# Supplementary material for: Metabolomics Analysis Reveals the Differences Between Bupleurum chinense DC. and Bupleurum scorzonerifolium Willd
Source: Front Plant Sci. 2022 Jul 13;13:933849. doi: 10.3389/fpls.2022.933849 (PMC9328751; doi:10.3389/fpls.2022.933849)
Supplement: Supplementary file 1 [file Table_1.XLSX]

## Sheet: Sheet1
Index	Platform	Formula	Compounds	物质	Class I	物质一级分类	Class II	物质二级分类	CAS	BcS1	BcS2	BcS3	BsS1	BsS2	BsS3	VIP	p_value	FDR	Fold_Change	Log2FC	Type
MWS2076	UPLC-MS/MS	C6H7NO	2-Aminophenol	2-氨基苯酚	Alkaloids	生物碱	Alkaloids	生物碱	95-55-6	30294	22511	37931	4264	6835.1	7198	1.35208	0.0281244	0.222536	0.201652	-2.31006	down
pmp001086	UPLC-MS/MS	C6H6O3	5-Hydroxymethylfurfural	5-羟甲基糠醛	Phenolic acids	酚酸类	Phenolic acids	酚酸类	67-47-0	21807	4536.9	29257	65277	68468	82460	1.13215	0.00544322	0.160623	3.88852	1.95922	up
ML10197929	UPLC-MS/MS	C4H9N3O2	Creatine	肌酸	Others	其它类	Others	其它	57-00-1	206370	77686	91769	29338	63456	57497	1.03841	0.200987	0.360195	0.399896	-1.3223	down
pme0243	UPLC-MS/MS	C5H8O4	Glutaric acid	戊二酸	Organic acids	有机酸	Organic acids	有机酸	110-94-1	271090	242810	315090	512890	2139400	1209600	1.19952	0.164777	0.340021	4.65855	2.21988	up
Lmgn000160	UPLC-MS/MS	C4H8N2O3	3-Ureidopropionic Acid	3-脲基丙酸	Organic acids	有机酸	Organic acids	有机酸	462-88-4	86219	16122	148260	14535	12152	14882	1.03922	0.209415	0.366064	0.165877	-2.59181	down
mws0001	UPLC-MS/MS	C4H8N2O3	L-Asparagine	L-天冬酰胺	Amino acids and derivatives	氨基酸及其衍生物	Amino acids and derivatives	氨基酸及其衍生物	70-47-3	4586500	1067200	6943800	921140	712100	786060	1.09234	0.18513	0.353083	0.192046	-2.38048	down
pme1173	UPLC-MS/MS	C5H4N4O	Allopurinol	别嘌呤醇	Nucleotides and derivatives	核苷酸及其衍生物	Nucleotides and derivatives	核苷酸及其衍生物	315-30-0	17874	66513	11927	7148.1	2469.8	9474.3	1.03959	0.274121	0.428325	0.198229	-2.33476	down
pme0033	UPLC-MS/MS	C5H4N4O	Hypoxanthine	次黄嘌呤	Nucleotides and derivatives	核苷酸及其衍生物	Nucleotides and derivatives	核苷酸及其衍生物	68-94-0	17778	53713	24768	13790	3748.4	9492.3	1.10536	0.163928	0.340021	0.280812	-1.83232	down
mws1336	UPLC-MS/MS	C7H7NO2	4-Aminobenzoic acid	对氨基苯甲酸	Phenolic acids	酚酸类	Phenolic acids	酚酸类	150-13-0	9	9619.5	7041	9	9	9	1.00449	0.19313	0.357087	0.00161972	-9.27004	down
mws0749	UPLC-MS/MS	C7H6O3	4-Hydroxybenzoic acid	4-羟基苯甲酸	Phenolic acids	酚酸类	Phenolic acids	酚酸类	99-96-7	754290	534250	570150	248880	228850	262670	1.35763	0.0296966	0.222536	0.398345	-1.32791	down
Hmgn001653	UPLC-MS/MS	C7H6O3	Protocatechualdehyde	原儿茶醛	Phenolic acids	酚酸类	Phenolic acids	酚酸类	139-85-5	929070	714370	881400	403750	375620	319010	1.36067	0.0103243	0.181558	0.43503	-1.20081	down
Hmbn004041	UPLC-MS/MS	C9H14O	2-Pentylfuran	2-戊基呋喃	Others	其它类	Others	其它	3777-69-3	118120	65924	130050	9	9	9	1.40176	0.0336033	0.225278	8.59615e-05	-13.5059	down
pmb0764	UPLC-MS/MS	C6H9NOS	4-Methyl-5-thiazoleethanol	4-甲基-5-噻唑乙醇	Others	其它类	Others	其它	137-00-8	30244	41406	28569	4399.5	14843	11960	1.1896	0.0122967	0.188646	0.311343	-1.68342	down
Hmsp000364	UPLC-MS/MS	C7H13NO2	L-Cyclopentylglycine	环戊基甘氨酸	Amino acids and derivatives	氨基酸及其衍生物	Amino acids and derivatives	氨基酸及其衍生物	2521-84-8	884240	625810	656730	1275300	1254700	2538900	1.19051	0.145995	0.319758	2.33937	1.22612	up
mws0567	UPLC-MS/MS	C5H11N3O2	4-Guanidinobutyric acid	4-胍基丁酸	Organic acids	有机酸	Organic acids	有机酸	463-00-3	4287600	3711000	2565300	9275700	10709000	15743000	1.32746	0.0431514	0.225278	3.38206	1.7579	up
mws1050	UPLC-MS/MS	C5H9NO4	O-Acetylserine	O-乙酰丝氨酸	Amino acids and derivatives	氨基酸及其衍生物	Amino acids and derivatives	氨基酸及其衍生物	5147-00-2	718600	665630	471680	237300	281030	264850	1.32509	0.0380599	0.225278	0.421992	-1.24471	down
Lmxp001668	UPLC-MS/MS	C9H10O2	2-Methoxy-4-ethenylphenol	2-甲氧基-4-乙烯基苯酚	Phenolic acids	酚酸类	Phenolic acids	酚酸类	7786-61-0	15627	15845	21790	48591	52423	54991	1.36814	0.0002468	0.0512276	2.92901	1.55041	up
pme2589	UPLC-MS/MS	C6H8O5	2-Oxoadipic acid	2-氧代己二酸	Organic acids	有机酸	Organic acids	有机酸	3184-35-8	9	9	9	773760	3328700	1187500	1.39937	0.155818	0.331416	195924	17.5799	up
mws1417	UPLC-MS/MS	C9H7NO2	Indole-3-carboxylic acid	吲哚-3-甲酸	Alkaloids	生物碱	Plumerane	吲哚类生物碱	771-50-6	38839	60325	30217	6109	11724	19088	1.20112	0.0585965	0.230553	0.285366	-1.80911	down
mws0102	UPLC-MS/MS	C9H7NO2	Indole-5-carboxylic acid	吲哚-5-甲酸	Alkaloids	生物碱	Plumerane	吲哚类生物碱	1670-81-1	14531	14282	18035	6895.5	4319.8	2441.2	1.27526	0.00338896	0.140188	0.291507	-1.7784	down
mws1346	UPLC-MS/MS	C6H11NO4	DL-2-Aminoadipic acid	DL-2-氨基己二酸	Alkaloids	生物碱	Alkaloids	生物碱	542-32-5	540080	577880	291340	3362700	6698800	6409700	1.36539	0.041468	0.225278	11.6875	3.5469	up
Lmcp000282	UPLC-MS/MS	C7H15NO3	L-Carnitine	左旋肉碱	Alkaloids	生物碱	Alkaloids	生物碱	541-15-1	561120	551900	1143800	4711000	4405200	5143900	1.35264	0.000168792	0.0512276	6.31867	2.65962	up
Hmqn002118	UPLC-MS/MS	C9H6O3	Umbelliferone	伞形酮	Lignans and Coumarins	木脂素和香豆素	Coumarins	香豆素	93-35-6	1366800	4098300	588490	323800	216530	433540	1.10427	0.252304	0.406617	0.160875	-2.63599	down
pme2914	UPLC-MS/MS	C6H10O5	3-Hydroxy-3-methylpentane-1,5-dioic acid	3-羟基-3-甲基谷氨酸	Amino acids and derivatives	氨基酸及其衍生物	Amino acids and derivatives	氨基酸及其衍生物	503-49-1	253350	301510	190120	9360400	880640	6627300	1.23197	0.164429	0.340021	22.6427	4.50097	up
Lmqp008175	UPLC-MS/MS	C10H10O2	Methyl Cinnamate	肉桂酸甲酯	Phenolic acids	酚酸类	Phenolic acids	酚酸类	103-26-4	261570	241100	157630	518840	564400	446090	1.31096	0.00355874	0.140188	2.31611	1.21171	up
Lmbp000123	UPLC-MS/MS	C6H13NO2S	L-Homomethionine	L-高甲硫氨酸	Amino acids and derivatives	氨基酸及其衍生物	Amino acids and derivatives	氨基酸及其衍生物	25148-30-5	9917.8	2799.8	3254.9	11313	25583	20198	1.17455	0.0604875	0.230553	3.57452	1.83775	up
mws0159	UPLC-MS/MS	C9H8O3	Phenylpyruvic acid	苯丙酮酸	Organic acids	有机酸	Organic acids	有机酸	156-06-9	35396	52710	44766	32148	7986.5	5345	1.09593	0.0549189	0.229052	0.342281	-1.54675	down
pme3083	UPLC-MS/MS	C8H7NO3	2-(Formylamino)benzoic acid	2-(甲酰氨基)苯甲酸	Phenolic acids	酚酸类	Phenolic acids	酚酸类	3342-77-6	266520	447120	543900	280260	124730	113530	1.12564	0.0743197	0.239969	0.412329	-1.27813	down
Lmrn003000	UPLC-MS/MS	C9H10O3	2-Hydroxy-3-phenylpropanoic acid	2-羟基-3-苯基丙酸	Phenolic acids	酚酸类	Phenolic acids	酚酸类	7326-19-4	387690	436600	347160	1355900	2636100	2429400	1.3597	0.0472166	0.225278	5.48158	2.45459	up
Lmbn005172	UPLC-MS/MS	C9H10O3	2,6-Dimethoxybenzaldehyde	2,6-二甲氧基苯甲醛	Phenolic acids	酚酸类	Phenolic acids	酚酸类	3392-97-0	129170	171500	78316	785420	1173900	1056300	1.36766	0.013093	0.188646	7.95707	2.99224	up
MWS0274	UPLC-MS/MS	C9H10O3	DL-3-Phenyllactic acid	DL-3-苯基乳酸	Organic acids	有机酸	Organic acids	有机酸	828-01-3	76045	85125	46104	394030	596790	541460	1.37402	0.0154885	0.191025	7.39253	2.88607	up
mws0467	UPLC-MS/MS	C9H10O3	3-(4-Hydroxyphenyl)-propionic acid	3-(4-羟基苯基)丙酸	Phenolic acids	酚酸类	Phenolic acids	酚酸类	501-97-3	187760	282610	144180	1128400	1635700	1334300	1.37019	0.0111496	0.183694	6.66894	2.73746	up
pma2400	UPLC-MS/MS	C11H18O	Dihydrojasmone	二氢茉莉酮	Organic acids	有机酸	Organic acids	有机酸	1128-08-1	65484	33778	41588	148250	287280	282390	1.32464	0.0465627	0.225278	5.09705	2.34966	up
pme2598	UPLC-MS/MS	C8H8O4	3,4-Dihydroxybenzeneacetic acid	3,4-二羟基苯乙酸	Phenolic acids	酚酸类	Phenolic acids	酚酸类	102-32-9	128570	44101	144460	9	35383	9	1.06475	0.0801041	0.245719	0.111629	-3.16322	down
pme3186	UPLC-MS/MS	C3H7O6P	DL-Glyceraldehyde-3-phosphate	DL-甘油醛-3-磷酸	Organic acids	有机酸	Organic acids	有机酸	591-59-3	9	23261	23533	9	9	9	1.00542	0.183517	0.352718	0.000576886	-10.7594	down
MA10039492	UPLC-MS/MS	C6H6O6	Dehydroascorbic acid	脱氢抗坏血酸	Others	其它类	Vitamin	维生素	490-83-5	1033700	629860	1307400	70919	71606	259400	1.28085	0.0387306	0.225278	0.135285	-2.88593	down
pme2550	UPLC-MS/MS	C6H6O6	Cis-Aconitic acid	顺式乌头酸	Organic acids	有机酸	Organic acids	有机酸	585-84-2	1077600	654010	991340	92650	134810	184370	1.35472	0.0232303	0.21559	0.151244	-2.72505	down
mws0154	UPLC-MS/MS	C7H10O5	Shikimic acid	莽草酸	Organic acids	有机酸	Organic acids	有机酸	138-59-0	3278500	1654700	3138500	180420	402260	559760	1.30079	0.0419148	0.225278	0.141536	-2.82075	down
mws0242	UPLC-MS/MS	C8H14O4	Suberic Acid	辛二酸	Organic acids	有机酸	Organic acids	有机酸	505-48-6	68408	102760	174380	18900	29374	25025	1.30945	0.0993899	0.26504	0.212124	-2.23702	down
mws4175	UPLC-MS/MS	C6H8O6	D-Glucurono-6,3-lactone	D-葡萄糖醛酸-6,3-内酯	Others	其它类	Saccharides and Alcohols	糖及醇类	32449-92-6	72736	39815	53828	111200	104570	168560	1.23678	0.0517885	0.225278	2.30997	1.20787	up
MWS2070	UPLC-MS/MS	C10H12O3	Propyl 4-hydroxybenzoate	4-羟基苯甲酸丙酯	Phenolic acids	酚酸类	Phenolic acids	酚酸类	94-13-3	4651.1	7945.6	4573.2	9874.1	20560	8560.4	1.0762	0.188804	0.355942	2.2711	1.18339	up
mws1350	UPLC-MS/MS	C9H10O4	Syringaldehyde; 4-Hydroxy-3,5-Dimethoxybenzaldehyde	丁香醛; 4-羟基-3,5-二甲氧基苯甲醛	Phenolic acids	酚酸类	Phenolic acids	酚酸类	134-96-3	188420	152460	230620	350030	335510	463580	1.27696	0.0232836	0.21559	2.01071	1.0077	up
Hmtn001288	UPLC-MS/MS	C9H10O4	Methyl 2,4-dihydroxyphenylacetate	2,4-二羟基苯乙酸甲酯	Phenolic acids	酚酸类	Phenolic acids	酚酸类	67828-42-6	12695	18950	10336	76446	110750	68563	1.36266	0.0276247	0.220879	6.09226	2.60698	up
Lmrn001951	UPLC-MS/MS	C9H10O4	(S)-2-Hydroxy-3-(4-Hydroxyphenyl)Propanoic Acid	2-羟基-(4-羟基苯基)丙酸	Phenolic acids	酚酸类	Phenolic acids	酚酸类	23508-35-2	18343	9228	6670.2	103730	141880	107250	1.36338	0.00857809	0.180987	10.3051	3.36529	up
mws1155	UPLC-MS/MS	C6H14O6	D-Mannitol	D-甘露醇	Others	其它类	Saccharides and Alcohols	糖及醇类	69-65-8	29485	113320	47924	29253	19083	23219	1.00283	0.257797	0.413324	0.375166	-1.4144	down
Lmcn002039	UPLC-MS/MS	C9H12O4	Antiarol; 3,4,5-Trimethoxyphenol	3,4,5-三甲氧基苯酚	Phenolic acids	酚酸类	Phenolic acids	酚酸类	642-71-7	485150	372310	574970	2128600	2345300	3240900	1.37085	0.022754	0.21559	5.38581	2.42916	up
mws0736	UPLC-MS/MS	C8H16N2O3	N-Glycyl-L-leucine	N-甘氨酰-L-亮氨酸	Amino acids and derivatives	氨基酸及其衍生物	Amino acids and derivatives	氨基酸及其衍生物	869-19-2	2179200	2769100	1693800	1030500	1181600	1000600	1.28387	0.0624167	0.230553	0.483687	-1.04785	down
pme0122	UPLC-MS/MS	C8H16N2O3	N6-Acetyl-L-lysine	N6-乙酰-L-赖氨酸	Amino acids and derivatives	氨基酸及其衍生物	Amino acids and derivatives	氨基酸及其衍生物	692-04-6	48064	54247	37576	13448	18323	26270	1.25187	0.0130323	0.188646	0.414913	-1.26912	down
Zmzp000145	UPLC-MS/MS	C9H20N2O2	Trimethyllysine	三甲基赖氨酸	Amino acids and derivatives	氨基酸及其衍生物	Amino acids and derivatives	氨基酸及其衍生物	23284-33-5	233660	140600	38700	3409.7	12174	9059.8	1.25006	0.147958	0.322422	0.0596753	-4.06672	down
pmp001232	UPLC-MS/MS	C12H14O2	Neoligustilide	新藁本内脂	Others	其它类	Others	其它	-	31116	22993	59579	9	9	9	1.40104	0.0760637	0.241723	0.000237492	-12.0398	down
MWSmce658	UPLC-MS/MS	C10H8O4	Noreugenin; 5,7-Dihydroxy-2-Methylchromone	去甲丁香色原酮; 5,7-二羟基-2-甲基色酮	Phenolic acids	酚酸类	Phenolic acids	酚酸类	1013-69-0	211540	616140	86388	3165.5	9	3342	1.16878	0.198967	0.359353	0.00712912	-7.13206	down
MWSCX014	UPLC-MS/MS	C10H8O4	Scopoletin (7-Hydroxy-6-methoxycoumarin)	东莨菪内酯	Lignans and Coumarins	木脂素和香豆素	Coumarins	香豆素	92-61-5	988220	1904000	1397500	598030	145290	106720	1.20928	0.0293291	0.222536	0.198157	-2.33528	down
Hmcp002123	UPLC-MS/MS	C10H8O4	Isoscopoletin (6-Hydroxy-7-Methoxycoumarin)	异莨菪亭	Lignans and Coumarins	木脂素和香豆素	Coumarins	香豆素	776-86-3	991800	1889700	1387600	502030	268250	241970	1.30534	0.042312	0.225278	0.237111	-2.07637	down
Lmdn003756	UPLC-MS/MS	C10H10O4	Methyl caffeate	咖啡酸甲酯	Phenolic acids	酚酸类	Phenolic acids	酚酸类	3843-74-1	113380	156350	97529	39436	22531	77751	1.13534	0.0343896	0.225278	0.380435	-1.39428	down
mws0027	UPLC-MS/MS	C9H10O5	Syringic acid	丁香酸	Phenolic acids	酚酸类	Phenolic acids	酚酸类	530-57-4	42501	53909	25992	162040	100130	89742	1.24574	0.0635613	0.230553	2.87505	1.52359	up
pma6599	UPLC-MS/MS	C11H10O4	6-Hydroxymethylherniarin	6-羟甲基脱肠草素	Lignans and Coumarins	木脂素和香豆素	Coumarins	香豆素	117597-79-2	96536	87894	79213	9	9	10960	1.14727	0.000288444	0.0512276	0.0416396	-4.5859	down
mws4173	UPLC-MS/MS	C11H10O4	5,7-Dimethoxycoumarin (Limettin)(Citropten)	5,7-二甲氧基香豆素 (柠檬内酯)(柠檬油素)	Lignans and Coumarins	木脂素和香豆素	Coumarins	香豆素	487-06-9	15861000	41080000	4853200	24848	14543	34103	1.36994	0.195031	0.357087	0.00118933	-9.71563	down
MA10107783	UPLC-MS/MS	C10H8O5	3-[(1-Carboxyvinyl)oxy]benzoic acid	3-[(1-羧乙烯基)氧基]苯甲酸	Phenolic acids	酚酸类	Phenolic acids	酚酸类	16929-37-6	1495000	1687600	1552200	6940700	11481000	10284000	1.38267	0.0275347	0.220879	6.06271	2.59996	up
mws0853	UPLC-MS/MS	C11H14O4	Sinapyl alcohol	芥子醇	Phenolic acids	酚酸类	Phenolic acids	酚酸类	537-33-7	785880	1090100	1562300	3476100	1589500	2062500	1.05402	0.15033	0.324405	2.07316	1.05183	up
pme1654	UPLC-MS/MS	C12H18O3	Jasmonic acid	茉莉酸	Organic acids	有机酸	Organic acids	有机酸	77026-92-7	803500	171050	2552000	92391	110340	45061	1.13318	0.264519	0.418331	0.0702647	-3.83106	down
MWSmce355	UPLC-MS/MS	C10H12O5	Methyl Syringate	丁香酸甲酯	Phenolic acids	酚酸类	Phenolic acids	酚酸类	884-35-5	9	9	9	21093	18960	12246	1.40105	0.0226133	0.21559	1937	10.9196	up
pmb2507	UPLC-MS/MS	C5H11O7P	2-Deoxyribose-1-phosphate	2-脱氧核糖-1-磷酸	Nucleotides and derivatives	核苷酸及其衍生物	Nucleotides and derivatives	核苷酸及其衍生物	17210-42-3	5035600	3908700	3829600	889870	943560	962970	1.39005	0.0132262	0.188646	0.218915	-2.19156	down
pme0170	UPLC-MS/MS	C8H16N4O3	N-Acetyl-L-Arginine	N-乙酰-L-精氨酸	Amino acids and derivatives	氨基酸及其衍生物	Amino acids and derivatives	氨基酸及其衍生物	155-84-0	31425	39646	19505	7916.6	9457.7	13033	1.25708	0.0672732	0.231097	0.33571	-1.57471	down
MWSmce257	UPLC-MS/MS	C9H17NO5	D-Pantothenic Acid	D-泛酸(维生素B5)	Others	其它类	Vitamin	维生素	79-83-4	1009500	621500	1343300	384430	542570	382980	1.18666	0.109201	0.277458	0.440433	-1.18301	down
Lmjp002764	UPLC-MS/MS	C11H10O5	Umckalin (7-hydroxy-5,6-dimethoxycoumarin)	5,6-二甲氧基-7-羟基香豆素	Lignans and Coumarins	木脂素和香豆素	Coumarins	香豆素	43053-62-9	247800	598490	288310	168120	105670	211030	1.07328	0.183108	0.352718	0.427305	-1.22666	down
Lmmp003517	UPLC-MS/MS	C13H20O3	Solatuberenol A	Solatuberenol A	Others	其它类	Others	其它	-	34278	56313	63200	1060900	2187300	1326900	1.38132	0.0492114	0.225278	29.7488	4.89476	up
Lmdp002381	UPLC-MS/MS	C11H14O5	Genipin	京尼平	Terpenoids	萜类	Monoterpenoids	倍萜	6902-77-8	59698	52360	37641	112740	146510	336370	1.23496	0.165162	0.340287	3.97878	1.99233	up
Cmsp002787	UPLC-MS/MS	C11H14O5	3,4'-Dihydroxy-3',5'-dimethoxypropiophenone	3,4'-二羟基-3',5'-二甲氧基苯乙酮	Phenolic acids	酚酸类	Phenolic acids	酚酸类	136196-47-9	232440	483260	183970	2097000	1372300	1303700	1.31469	0.0254976	0.22075	5.30528	2.40743	up
Zmnn007376	UPLC-MS/MS	C14H12O3	Xanthyletin	花椒内酯	Lignans and Coumarins	木脂素和香豆素	Coumarins	香豆素	553-19-5	86009	34238	31998	12645	6513.5	3465.8	1.24769	0.130934	0.307783	0.148605	-2.75045	down
Lmhp001670	UPLC-MS/MS	C11H22N2O3	L-Valyl-L-Leucine	L-缬氨酰-L-亮氨酸	Amino acids and derivatives	氨基酸及其衍生物	Amino acids and derivatives	氨基酸及其衍生物	3989-97-7	6276100	8396600	4425000	2238600	2044200	2492600	1.30178	0.0681688	0.231775	0.354776	-1.49502	down
Hmlp006964	UPLC-MS/MS	C12H12O5	5,6,7-Trimethoxycoumarin	5,6,7-三甲氧基香豆素	Lignans and Coumarins	木脂素和香豆素	Coumarins	香豆素	55085-47-7	89243	186140	42234	9	9	9	1.395	0.129715	0.306348	8.5008e-05	-13.522	down
mws0984	UPLC-MS/MS	C9H11N5O3	L-Sepiapterin	L-墨喋呤	Nucleotides and derivatives	核苷酸及其衍生物	Nucleotides and derivatives	核苷酸及其衍生物	17094-01-8	44437	13450	23510	9	9	9	1.39671	0.097026	0.261484	0.000331708	-11.5578	down
mws0221	UPLC-MS/MS	C6H12N2O4S2	L-Cystine	L-胱氨酸	Amino acids and derivatives	氨基酸及其衍生物	Amino acids and derivatives	氨基酸及其衍生物	56-89-3	6201.3	7450.7	6871.2	22204	13673	43468	1.23237	0.157119	0.33229	3.86611	1.95088	up
pmb2591	UPLC-MS/MS	C13H14N2O3	N-Acetyl-L-Tryptophan	N-乙酰-L-色氨酸	Amino acids and derivatives	氨基酸及其衍生物	Amino acids and derivatives	氨基酸及其衍生物	1218-34-4	344790	221680	591100	1730300	2707400	1690900	1.30779	0.0283963	0.222536	5.29437	2.40446	up
Lmrj002087	UPLC-MS/MS	C10H18N2O5	L-Isoleucyl-L-Aspartate	L-异亮氨酰-L-天冬氨酸	Amino acids and derivatives	氨基酸及其衍生物	Amino acids and derivatives	氨基酸及其衍生物	-	1139200	1242500	1028500	480720	661490	371680	1.29251	0.00501367	0.154142	0.44393	-1.1716	down
pme3961	UPLC-MS/MS	C10H13N5O3	2'-Deoxyadenosine	2'-脱氧腺苷	Nucleotides and derivatives	核苷酸及其衍生物	Nucleotides and derivatives	核苷酸及其衍生物	958-09-8	1608000	1871000	2156100	3591700	4081000	3635900	1.34928	0.00104979	0.103579	2.00681	1.00491	up
mws0120	UPLC-MS/MS	C8H20NO6P	Choline Alfoscerate	甘磷酸胆碱 GPC	Lipids	脂质	PC	磷脂酰胆碱	28319-77-9	256440	481660	168540	136290	85241	122480	1.11266	0.179059	0.351498	0.379435	-1.39808	down
mws1090	UPLC-MS/MS	C6H13O9P	Glucose-1-phosphate	葡萄糖-1-磷酸	Others	其它类	Saccharides and Alcohols	糖及醇类	59-56-3	201130	359850	510130	85592	118390	106510	1.2695	0.10307	0.270939	0.289879	-1.78648	down
mws0866	UPLC-MS/MS	C6H13O9P	D-Glucose 6-phosphate	D-葡萄糖-6-磷酸	Others	其它类	Saccharides and Alcohols	糖及醇类	56-73-5	187290	397410	591710	102690	83988	95338	1.25788	0.124933	0.30182	0.239726	-2.06054	down
Lmhp002001	UPLC-MS/MS	C14H20N2O3	L-Valyl-L-Phenylalanine	L-缬氨酰-L-苯丙氨酸	Amino acids and derivatives	氨基酸及其衍生物	Amino acids and derivatives	氨基酸及其衍生物	3918-92-1	1659200	2051400	808350	495400	492280	640900	1.181	0.117097	0.289643	0.360389	-1.47237	down
pmp001244	UPLC-MS/MS	C14H20NO4+	Caffeoylcholine	咖啡酰胆碱	Alkaloids	生物碱	Alkaloids	生物碱	87189-10-4	9	9	9	12394	37353	67619	1.39356	0.133958	0.308876	4346.89	12.0858	up
mws1175	UPLC-MS/MS	C16H14O4	Pinostrobin	球松素	Flavonoids	黄酮	Flavanones	二氢黄酮	480-37-5	10320	21774	81403	5547.7	3847.7	6963.1	1.11978	0.279373	0.43134	0.144132	-2.79454	down
mws1297	UPLC-MS/MS	C13H18O6	Benzyl glucoside	苄基葡萄糖苷	Phenolic acids	酚酸类	Phenolic acids	酚酸类	4304-12-5	28145	17022	13206	87415	74133	57167	1.31934	0.0124304	0.188646	3.74685	1.90568	up
mws0914	UPLC-MS/MS	C15H12O5	Pinobanksin	短叶松素	Flavonoids	黄酮	Flavanonols	二氢黄酮醇	548-82-3	256.67	3131.7	550.29	2360.2	3720.2	16264	1.00553	0.298465	0.448075	5.6731	2.50414	up
mws0629	UPLC-MS/MS	C13H16N2O5	L-Aspartyl-L-Phenylalanine	L-天冬氨酰-L-苯丙氨酸	Amino acids and derivatives	氨基酸及其衍生物	Amino acids and derivatives	氨基酸及其衍生物	13433-09-5	501140	408860	419660	182510	208050	193690	1.37724	0.0098814	0.181558	0.439398	-1.1864	down
mws0918	UPLC-MS/MS	C16H12O5	Prunetin (5,4'-Dihydroxy-7-methoxyisoflavone)	樱黄素	Flavonoids	黄酮	Isoflavones	异黄酮	552-59-0	25170	12549	16721	81850	40086	48878	1.24755	0.0826188	0.248154	3.13766	1.64969	up
mws1068	UPLC-MS/MS	C15H10O6	Kaempferol (3,5,7,4'-Tetrahydroxyflavone)	山奈酚	Flavonoids	黄酮	Flavonols	黄酮醇	520-18-3	651540	561490	198690	21820	15217	8007	1.34711	0.081095	0.247218	0.0319072	-4.96998	down
mws0064	UPLC-MS/MS	C15H12O6	Eriodictyol (5,7,3',4'-Tetrahydroxyflavanone)	圣草酚	Flavonoids	黄酮	Flavanones	二氢黄酮	552-58-9	6719.7	28633	5654.7	68650	35799	68328	1.17279	0.0351454	0.225278	4.21331	2.07495	up
pmn001686	UPLC-MS/MS	C16H32O4	10,16-Dihydroxypalmitic acid	10,16-二羟基棕榈酸	Lipids	脂质	Free fatty acids	游离脂肪酸	3233-90-7	9723.5	15256	12967	4198	10316	3175.7	1.06567	0.0762012	0.241723	0.466175	-1.10106	down
pmb2657	UPLC-MS/MS	C10H18N4O6	Argininosuccinic acid	精氨基琥珀酸	Organic acids	有机酸	Organic acids	有机酸	2387-71-5	16310	24711	29596	8227.1	13089	8494.2	1.24212	0.0568533	0.230553	0.422141	-1.2442	down
Zmyn004676	UPLC-MS/MS	C18H30O3	17-Hydroxylinolenic acid	17-羟基亚麻酸	Lipids	脂质	Free fatty acids	游离脂肪酸	-	244360	191330	241240	77464	106800	139680	1.25443	0.00913055	0.181558	0.478549	-1.06326	down
Lmqp000329	UPLC-MS/MS	C8H14N3O7P	5-Aminoimidazole ribonucleotide	5-氨基咪唑核糖核苷酸	Nucleotides and derivatives	核苷酸及其衍生物	Nucleotides and derivatives	核苷酸及其衍生物	25635-88-5	87173	186130	109650	48510	38039	43499	1.27761	0.104989	0.272138	0.339593	-1.55812	down
mws0724	UPLC-MS/MS	C10H13N5O6	8-Hydroxyguanosine	8-羟基鸟苷	Nucleotides and derivatives	核苷酸及其衍生物	Nucleotides and derivatives	核苷酸及其衍生物	3868-31-3	66143	57379	52774	9	9	9	1.40224	0.00442391	0.151094	0.000153152	-12.6728	down
Lmmn002230	UPLC-MS/MS	C15H8O7	Demethylwedelolactone	去甲基蟛蜞菊内酯	Lignans and Coumarins	木脂素和香豆素	Coumarins	香豆素	6468-55-9	1636400	6136000	1119200	161880	84278	377350	1.23601	0.225487	0.38067	0.0701233	-3.83396	down
MWSHY0009	UPLC-MS/MS	C16H12O6	Diosmetin (5,7,3'-Trihydroxy-4'-methoxyflavone)	香叶木素	Flavonoids	黄酮	Flavones	黄酮	520-34-3	9	6259.3	9	84434	52281	71860	1.18088	0.0151586	0.188668	33.2269	5.05428	up
Lmjp004941	UPLC-MS/MS	C16H12O6	Rhamnocitrin (7-MethylKaempferol)	鼠李柠檬素	Flavonoids	黄酮	Flavones	黄酮	569-92-6	10867	7940.3	7779.9	60184	73073	73411	1.39493	0.00365742	0.140188	7.77321	2.95851	up
MWS20189	UPLC-MS/MS	C16H12O6	Tectorigenin	鸢尾黄素	Flavonoids	黄酮	Isoflavones	异黄酮	548-77-6	7919.5	6337.8	3399.7	69196	72899	75922	1.38141	2.73024e-05	0.0484891	12.3473	3.62613	up
Hmtn001302	UPLC-MS/MS	C13H16O8	Glucosyloxybenzoic acid	葡萄糖氧基苯甲酸	Phenolic acids	酚酸类	Phenolic acids	酚酸类	-	39586000	33929000	23423000	16994000	6910200	8579800	1.22825	0.0250588	0.22075	0.335101	-1.57733	down
pme3514	UPLC-MS/MS	C15H10O7	Morin	桑色素	Flavonoids	黄酮	Flavonols	黄酮醇	480-16-0	2766100	2211400	1391000	241430	190400	382480	1.345	0.0410805	0.225278	0.127865	-2.9673	down
Zmpp002571	UPLC-MS/MS	C15H10O7	Robinetin	刺槐亭	Flavonoids	黄酮	Flavonols	黄酮醇	490-31-3	679280	619990	176780	42089	20841	27294	1.31357	0.100141	0.266358	0.0611253	-4.03209	down
mws1326	UPLC-MS/MS	C15H10O7	Herbacetin	草质素	Flavonoids	黄酮	Flavonols	黄酮醇	527-95-7	3494.6	7361	2755.1	9	9	9	1.39508	0.0867306	0.252836	0.00198373	-8.97757	down
Hmcn002875	UPLC-MS/MS	C15H10O7	6-Hydroxyluteolin	6-羟基木犀草素	Flavonoids	黄酮	Flavones	黄酮	18003-33-3	33303	39164	33670	9	9	9	1.4026	0.00285953	0.137257	0.000254388	-11.9407	down
Hmsn002598	UPLC-MS/MS	C13H18O8	Salirepin	柳匍匐次苷	Phenolic acids	酚酸类	Phenolic acids	酚酸类	26652-12-0	404070	346050	212980	150270	68287	86673	1.24041	0.0439087	0.225278	0.316925	-1.65779	down
pmn001610	UPLC-MS/MS	C20H36O2	Eicosadienoic acid	二十碳二烯酸	Lipids	脂质	Free fatty acids	游离脂肪酸	5598-38-9	129620	216240	146720	53776	89888	69180	1.24713	0.0568824	0.230553	0.4321	-1.21056	down
Zmyn004449	UPLC-MS/MS	C18H30O4	9-Hydroxy-12-oxo-10(E),15(Z)-octadecadienoic acid	9-羟基-12-氧代-10(E),15(Z)-十八碳二烯酸	Lipids	脂质	Free fatty acids	游离脂肪酸	-	45518	47279	34362	21395	17926	14792	1.32371	0.0139103	0.188646	0.425554	-1.23259	down
Jmbn003691	UPLC-MS/MS	C15H20O7	3,4-dihydroxy-allylbenzene-3-O-β-D-glucopyranoside	3,4-二羟基烯丙基-3-O-β-D-葡萄吡喃糖苷	Others	其它类	Others	其它	-	387710	278500	146890	614990	352400	905450	1.03524	0.14453	0.317387	2.30333	1.20372	up
Zmzp006646	UPLC-MS/MS	C16H12O7	Capillarisin	茵陈色原酮	Others	其它类	Others	其它	56365-38-9	1077600	844370	439960	171640	81997	225430	1.24611	0.0714634	0.237676	0.202829	-2.30167	down
mws0066	UPLC-MS/MS	C16H12O7	Isorhamnetin	异鼠李素	Flavonoids	黄酮	Flavonols	黄酮醇	480-19-3	929420	832320	366400	121140	67965	207210	1.23976	0.0729692	0.238358	0.186226	-2.42487	down
mws2627	UPLC-MS/MS	C16H12O7	Tamarixetin (3,3',5,7-Tetrahydroxy-4'-Methoxyflavone)	柽柳黄素	Flavonoids	黄酮	Flavonols	黄酮醇	603-61-2	263140	266840	101470	24938	9068.3	57368	1.19924	0.0723957	0.238102	0.144706	-2.78881	down
pmn001553	UPLC-MS/MS	C14H20O8	Cimidahurinine	北升麻宁	Phenolic acids	酚酸类	Phenolic acids	酚酸类	142542-89-0	294910	435930	233690	662030	811870	950960	1.28917	0.0114428	0.184749	2.51403	1.33	up
Hmtn001120	UPLC-MS/MS	C14H20O8	5-(2-Hydroxyethyl)-2-O-glucosylphenol	5-(2-羟乙基)-2-O-葡萄糖基苯酚	Phenolic acids	酚酸类	Phenolic acids	酚酸类	-	225200	367360	174400	579500	651810	746850	1.27901	0.00637491	0.16949	2.57922	1.36694	up
Lmyp010328	UPLC-MS/MS	C20H30O3	2-Oxokovalenic acid	2-Oxokovalenic acid	Terpenoids	萜类	Ditepenoids	二萜	-	21380	52907	25957	9	9	9	1.39949	0.0768271	0.242342	0.000269343	-11.8583	down
pme2074	UPLC-MS/MS	C18H29NO4	(-)-Jasmonoyl-L-Isoleucine	(-)-茉莉酰-L-异亮氨酸	Organic acids	有机酸	Organic acids	有机酸	120330-93-0	476450	109560	375540	50907	87718	27269	1.16815	0.132928	0.3082	0.172528	-2.5351	down
Lmbp003825	UPLC-MS/MS	C15H16O8	Skimmin (7-Hydroxycoumarin-7-O-glucoside)	茵芋苷	Lignans and Coumarins	木脂素和香豆素	Coumarins	香豆素	93-39-0	301730	1608400	504890	173240	133540	234920	1.08434	0.263479	0.417931	0.224305	-2.15647	down
Hmpp003624	UPLC-MS/MS	C20H20O4	1-(4-Hydroxyphenyl)-7-(3-methoxy-4-hydroxyphenyl)-4,6-heptadiene-3-one	1-(4-羟基苯基)-7-(3-甲氧基-4-羟基苯基)-4,6-庚二烯-3-酮	Phenolic acids	酚酸类	Phenolic acids	酚酸类	-	98459	168180	88109	283320	371180	422310	1.30449	0.0115833	0.185333	3.03542	1.6019	up
Zmhn002301	UPLC-MS/MS	C15H18O8	p-Coumaric acid-4-O-glucoside	对香豆酸-4-O-葡萄糖苷	Phenolic acids	酚酸类	Phenolic acids	酚酸类	117405-48-8	6284100	5892300	5606300	14278000	13362000	9889400	1.33579	0.0364125	0.225278	2.11044	1.07755	up
Smjp002269	UPLC-MS/MS	C18H17NO5	N-[3-(4-Hydroxyphenyl)acryloyl]-L-tyrosine	N-[3-(4-羟基苯基)丙烯酰基]-L-酪氨酸	Amino acids and derivatives	氨基酸及其衍生物	Amino acids and derivatives	氨基酸及其衍生物	77201-66-2	9	9	9	43902	54650	40206	1.40242	0.00866209	0.180987	5139.19	12.3273	up
pmn001690	UPLC-MS/MS	C16H24O7	3-Hydroxy-4-isopropylbenzylalcohol-3-O-glucoside	3-羟基-4-异丙基苯甲醇-3-O-葡萄糖苷	Phenolic acids	酚酸类	Phenolic acids	酚酸类	-	165970	334310	197320	6247	4151.9	10350	1.37724	0.0485213	0.225278	0.0297433	-5.07129	down
Lmtn002565	UPLC-MS/MS	C14H18O9	1-O-Vanilloyl-D-Glucose	1-O-香草酰-D-葡萄糖	Phenolic acids	酚酸类	Phenolic acids	酚酸类	-	288770	520300	80106	37460	7830.5	15679	1.22553	0.161415	0.337262	0.0685685	-3.86631	down
Lmmn003663	UPLC-MS/MS	C14H18O9	5-Glucosyloxy-2-Hydroxybenzoic acid methyl ester	5-葡萄糖氧基-2-羟基苯甲酸甲酯	Phenolic acids	酚酸类	Phenolic acids	酚酸类	-	267700	578950	68655	9	15124	9	1.16238	0.18058	0.351498	0.0165431	-5.91762	down
pme3184	UPLC-MS/MS	C10H14N5O6P	2'-Deoxyadenosine-5'-monophosphate	2'-脱氧腺苷-5'-单磷酸	Nucleotides and derivatives	核苷酸及其衍生物	Nucleotides and derivatives	核苷酸及其衍生物	653-63-4	42778	58292	60377	238150	248830	158630	1.35249	0.0260767	0.22075	3.9989	1.9996	up
pmb0789	UPLC-MS/MS	C14H21NO8	Pyridoxine-5'-O-glucoside	吡哆醇-5'-O-葡萄糖苷	Others	其它类	Vitamin	维生素	-	119010	210900	163690	799440	807500	426640	1.30611	0.0496251	0.225278	4.11989	2.04261	up
Zmhn001703	UPLC-MS/MS	C13H16O10	5-O-Galloyl-D-hamamelose	5-O-没食子酰-D-金缕梅糖	Phenolic acids	酚酸类	Phenolic acids	酚酸类	-	27651	447330	59649	3123700	3189800	4375000	1.27594	0.00859089	0.180987	19.9923	4.32137	up
Lmfn000604	UPLC-MS/MS	C13H16O10	6-O-Galloyl-D-glucose	6-O-没食子酰-D-葡萄糖	Phenolic acids	酚酸类	Phenolic acids	酚酸类	13186-19-1	42029	518920	59674	3355000	3326700	4271900	1.28025	0.00234259	0.128551	17.6494	4.14154	up
Hmln000659	UPLC-MS/MS	C13H16O10	3-O-Galloyl-D-glucose	3-O-没食子酰-D-葡萄糖	Phenolic acids	酚酸类	Phenolic acids	酚酸类	-	50324	9	31618	3415300	3317900	5232700	1.11379	0.0237756	0.21559	146.013	7.18995	up
pmn001421	UPLC-MS/MS	C16H18O8	3-O-p-Coumaroylquinic acid	3-O-对香豆酰奎宁酸	Phenolic acids	酚酸类	Phenolic acids	酚酸类	87099-71-6	392380	438750	2170700	58884	48508	150530	1.22289	0.258265	0.413465	0.0859216	-3.54084	down
Lmbn001162	UPLC-MS/MS	C15H16O9	Esculetin-7-O-glucoside	秦皮乙素-7-O-葡萄糖苷	Lignans and Coumarins	木脂素和香豆素	Coumarins	香豆素	-	1468400	3718600	1829200	5742000	3190100	5681100	1.05655	0.0835565	0.248154	2.08278	1.05851	up
Cmyn001328	UPLC-MS/MS	C15H16O9	Daphnin	瑞香苷	Lignans and Coumarins	木脂素和香豆素	Coumarins	香豆素	486-55-5	1435700	2731200	2117700	5357300	3563600	5919200	1.22109	0.0374187	0.225278	2.36134	1.23961	up
mws1015	UPLC-MS/MS	C15H16O9	Esculin (6,7-DihydroxyCoumarin-6-glucoside)	秦皮甲素	Lignans and Coumarins	木脂素和香豆素	Coumarins	香豆素	531-75-9	1254300	3549400	2223200	5270000	4071800	5482100	1.11002	0.0382807	0.225278	2.10959	1.07696	up
Hmjp006104	UPLC-MS/MS	C19H21NO5	N-Cis-Feruloyl-3'-O-methyldopamine	N-顺式阿魏酰基-3'-O-甲基多巴胺	Alkaloids	生物碱	Phenolamine	酚胺	-	2900900	4803500	2632000	13473	10689	16902	1.39709	0.0374464	0.225278	0.00397276	-7.97564	down
Zmhp004065	UPLC-MS/MS	C18H16O7	7,8-Dihydroxy-5,6,4'-trimethoxyflavone	7,8-二羟基-5,6,4'-三甲氧基黄酮	Flavonoids	黄酮	Flavones	黄酮	-	6705.3	9	9	40551	22063	27332	1.13176	0.0243939	0.218806	13.3783	3.74182	up
mws1474	UPLC-MS/MS	C18H16O7	5,7-Dihydroxy-3',4',5'-trimethoxyflavone	5,7-二羟基-3',4',5'-三甲氧基黄酮	Flavonoids	黄酮	Flavones	黄酮	18103-42-9	8071.5	9	9	66752	41274	43457	1.1512	0.0195582	0.206707	18.7259	4.22696	up
pmp000786	UPLC-MS/MS	C18H16O7	Eupatorin; 3',5-Dihydroxy-4',6,7-Trimethoxyflavone	泽兰黄素; 3',5-二羟基-4',6,7-三甲氧基黄酮	Flavonoids	黄酮	Flavones	黄酮	855-96-9	3782.7	9	9	28526	12891	11448	1.13683	0.0891603	0.253764	13.9093	3.79798	up
Lmmn000774	UPLC-MS/MS	C15H20O9	Dihydrocaffeoylglucose	二氢咖啡酰葡萄糖	Phenolic acids	酚酸类	Phenolic acids	酚酸类	-	199720	1049400	874470	146600	119110	78216	1.16967	0.148382	0.322949	0.161955	-2.62634	down
Zmln000899	UPLC-MS/MS	C15H20O9	Syringaldehyde-4-O-glucoside	丁香醛-4-O-葡萄糖苷	Phenolic acids	酚酸类	Phenolic acids	酚酸类	-	28818	37925	10886	79189	37269	62206	1.02334	0.0921024	0.255855	2.30151	1.20258	up
mws0609	UPLC-MS/MS	C10H12N5O7P	Guanosine 3',5'-cyclic monophosphate	鸟苷 3',5'-环单磷酸	Nucleotides and derivatives	核苷酸及其衍生物	Nucleotides and derivatives	核苷酸及其衍生物	7665-99-8	4414800	6864300	3249700	1046500	3112300	1420300	1.1063	0.0884711	0.253241	0.384003	-1.38081	down
pmb0801	UPLC-MS/MS	C14H19NO9	4-Pyridoxic acid-O-glucoside	4-吡哆酸-O-葡萄糖苷	Others	其它类	Vitamin	维生素	-	19223	8103.4	19880	26296	49806	53188	1.14199	0.0659227	0.230553	2.73882	1.45356	up
Lmdn001560	UPLC-MS/MS	C15H22O9	6-DeoxyCatalpol	6-脱氧梓醇	Terpenoids	萜类	Monoterpenoids	倍萜	99499-99-7	62204	36221	26390	80692	95796	126110	1.21352	0.0277029	0.220879	2.42437	1.27761	up
mws1629	UPLC-MS/MS	C15H22O9	Aucubin	桃叶珊瑚苷	Terpenoids	萜类	Sesquiterpenoids	倍半萜	479-98-1	32950	87558	94129	344570	477220	507950	1.30725	0.00985004	0.181558	6.1953	2.63117	up
Cmrn003066	UPLC-MS/MS	C16H26O8	Kankanoside P	甘蓝苷 P	Terpenoids	萜类	Monoterpenoids	倍萜	-	9	9	9	23213	26286	31432	1.40263	0.00781196	0.180182	2997.44	11.5495	up
Cmrn002988	UPLC-MS/MS	C16H26O8	Kankanoside A	甘蓝苷 A	Terpenoids	萜类	Monoterpenoids	倍萜	-	38289	74208	65835	27291	15884	3934.5	1.11346	0.035296	0.225278	0.264167	-1.92048	down
Lmhp011562	UPLC-MS/MS	C21H36O4	1-α-Linolenoyl-glycerol	1-α-亚麻酸甘油酯	Lipids	脂质	Glycerol ester	甘油酯	-	77488	81293	37870	466220	363200	266150	1.33397	0.0295391	0.222536	5.57114	2.47797	up
Lmhp011388	UPLC-MS/MS	C21H36O4	2-α-Linolenoyl-glycerol	2-α-亚麻酸甘油酯	Lipids	脂质	Glycerol ester	甘油酯	55268-58-1	33737	32589	11678	377520	313600	280130	1.35896	0.00639403	0.16949	12.4513	3.63822	up
pme1816	UPLC-MS/MS	C16H18O9	Neochlorogenic acid (5-O-Caffeoylquinic acid)*	新绿原酸 (5-O-咖啡酰奎宁酸)*	Phenolic acids	酚酸类	Phenolic acids	酚酸类	906-33-2	399630	611940	284600	76052	63129	121630	1.30964	0.0647658	0.230553	0.201217	-2.31318	down
Zmhn002422	UPLC-MS/MS	C16H20O9	1-O-Feruloyl-β-D-glucose	1-O-阿魏酰-β-D-葡萄糖	Phenolic acids	酚酸类	Phenolic acids	酚酸类	7196-71-6	717380	1402200	356200	223190	196390	369800	1.05439	0.205453	0.362708	0.318841	-1.64909	down
Hmmn002544	UPLC-MS/MS	C16H20O9	Ferulic acid-4-O-glucoside	阿魏酸-4-O-葡萄糖苷	Phenolic acids	酚酸类	Phenolic acids	酚酸类	117405-51-3	629160	1179400	593130	156450	136040	231680	1.31516	0.0776499	0.243221	0.21825	-2.19594	down
Lmcp005293	UPLC-MS/MS	C20H20O6	6,7-Dimethoxy-2-[2-(3'-Hydroxy-4'-Methoxyphenyl)Ethyl]Chromone	6,7-二甲氧基-2-[2-(3-羟基-4-甲氧基)苯乙基]色酮	Others	其它类	Others	其它	-	14883000	18746000	20058000	4743200	829830	3089900	1.24733	0.00207822	0.127273	0.16136	-2.63165	down
Zmhn003082	UPLC-MS/MS	C15H18O10	5-O-Galloyl-methyl quinine ester	5-O-没食子酰-奎宁酸甲酯	Phenolic acids	酚酸类	Phenolic acids	酚酸类	-	9	9	9	99744	119910	58977	1.40101	0.0352827	0.225278	10319.7	13.3331	up
Lmsp004450	UPLC-MS/MS	C20H22O6	Dehydrodiconiferyl alcohol	脱氢双松柏醇	Phenolic acids	酚酸类	Phenolic acids	酚酸类	97465-82-2	1721800	2898800	1357900	754480	719060	907070	1.22843	0.121047	0.296114	0.398195	-1.32845	down
pmb3107	UPLC-MS/MS	C15H20O10	Glucosyringic Acid	葡萄糖基丁香酸	Phenolic acids	酚酸类	Phenolic acids	酚酸类	-	470280	772650	1212200	3062100	3197300	2589300	1.28511	0.00183977	0.122764	3.60417	1.84967	up
Lmbp002309	UPLC-MS/MS	C17H22O9	Sinapaldehyde-4-O-Glucoside	芥子醛-4-O-葡萄糖苷	Phenolic acids	酚酸类	Phenolic acids	酚酸类	154461-65-1	16096	69113	51354	100860	215240	128710	1.10561	0.0787912	0.243786	3.25718	1.70362	up
mws1574	UPLC-MS/MS	C16H22O10	Geniposidic acid	京尼平苷酸	Terpenoids	萜类	Monoterpenoids	倍萜	27741-01-1	100620	225600	25874	9	7288.1	9	1.1607	0.187072	0.3542	0.0207504	-5.59072	down
Lmdn001501	UPLC-MS/MS	C16H22O10	Gardoside	栀子新苷	Terpenoids	萜类	Monoterpenoids	倍萜	54835-76-6	98863	220020	37376	9	9	9	1.39207	0.157351	0.33229	7.57876e-05	-13.6877	down
Hmlp002744	UPLC-MS/MS	C20H22O7	Nortrachelogenin	去甲络石苷元	Lignans and Coumarins	木脂素和香豆素	Lignans	木脂素	34444-37-6	1369400	3223700	1577700	394250	68883	293440	1.23884	0.0876585	0.252836	0.122605	-3.02791	down
Lmzn001983	UPLC-MS/MS	C16H24O10	D-Threo-guaiacylglycerol-7-O-β-D-glucoside	D-苏式-愈创木基甘油-7-O-β-D-葡萄糖苷	Phenolic acids	酚酸类	Phenolic acids	酚酸类	-	120500	108740	202340	203980	252380	445570	1.06828	0.156126	0.331675	2.08983	1.06339	up
Hmap007816	UPLC-MS/MS	C24H30O4	Feselol	Feselol	Lignans and Coumarins	木脂素和香豆素	Coumarins	香豆素	51020-36-1	38821	70342	40599	9	9	9	1.40117	0.0394881	0.225278	0.000180286	-12.4374	down
Lmjp003090	UPLC-MS/MS	C17H20O10	Isofraxidin-7-O-glucoside	异秦皮啶-7-O-葡萄糖苷	Lignans and Coumarins	木脂素和香豆素	Coumarins	香豆素	483-91-0	9	9	9	588110	73370	697060	1.38945	0.142749	0.317214	50316.3	15.6187	up
Zmcp102801	UPLC-MS/MS	C17H20O10	Saikochromoside A	柴胡色原酮苷A	Others	其它类	Others	其它	-	25798000	31208000	9918800	9505.9	4629.5	9980.5	1.39223	0.0731762	0.238358	0.000360343	-11.4383	down
Zmcp001750	UPLC-MS/MS	C17H20O10	Eleutheroside B1	刺五加苷 B1	Lignans and Coumarins	木脂素和香豆素	Coumarins	香豆素	16845-16-2	2318900	4799700	1457200	9	15601	27679	1.13945	0.104915	0.272138	0.00504781	-7.63013	down
Lmbp003208	UPLC-MS/MS	C17H20O10	Fraxidin-8-O-glucoside	秦皮啶-8-O-葡萄糖苷	Lignans and Coumarins	木脂素和香豆素	Coumarins	香豆素	-	2313600	3873800	925500	11122	8502	16089	1.37758	0.109347	0.277458	0.00502088	-7.63784	down
pme1286	UPLC-MS/MS	C14H20N6O5S	S-(5'-Adenosy)-L-homocysteine	S-(5-腺苷)-L-高半胱氨酸	Amino acids and derivatives	氨基酸及其衍生物	Amino acids and derivatives	氨基酸及其衍生物	979-92-0	109820	110090	81115	33903	51464	24885	1.27588	0.00761185	0.180182	0.366255	-1.44908	down
pmb3062	UPLC-MS/MS	C17H22O10	1-O-Eudesmoylquinic acid	1-O-菊酯酰奎宁酸	Phenolic acids	酚酸类	Phenolic acids	酚酸类	-	44543	29130	53988	97439	113260	95346	1.28759	0.00357467	0.140188	2.39733	1.26143	up
HJN003	UPLC-MS/MS	C17H22O10	1-O-Sinapoyl-D-glucose	1-O-芥子酰-D-葡萄糖	Phenolic acids	酚酸类	Phenolic acids	酚酸类	-	121660	64282	162820	518880	351720	272710	1.22445	0.0525684	0.225278	3.2782	1.7129	up
Cmdp003280	UPLC-MS/MS	C17H24O10	7-Dehydroxyzaluzioside	7-Dehydroxyzaluzioside	Terpenoids	萜类	Monoterpenoids	倍萜	-	443260	381560	380480	1980100	1487300	1705900	1.39118	0.0102051	0.181558	4.29213	2.10169	up
Zmjp003597	UPLC-MS/MS	C19H32O8	Ampelopsisionoside	蛇葡萄紫罗兰酮糖苷	Others	其它类	Others	其它	-	43207	21703	23618	140030	129670	363390	1.30046	0.139129	0.314768	7.1513	2.8382	up
pmb0489	UPLC-MS/MS	C19H28N2O7	N-Glucosyl-p-coumaroylputrescine	N-葡萄糖基对香豆酰腐胺	Alkaloids	生物碱	Phenolamine	酚胺	-	2194	5072.3	3389.9	11048	6130.4	14386	1.17668	0.0878371	0.252836	2.96207	1.56661	up
pme2735	UPLC-MS/MS	C15H22N6O5S	S-Adenosyl-L-methionine	S-腺苷-L-蛋氨酸	Amino acids and derivatives	氨基酸及其衍生物	Amino acids and derivatives	氨基酸及其衍生物	29908-03-0	78970	55899	33745	16483	5520.5	13800	1.23474	0.0691647	0.233277	0.21234	-2.23555	down
Hmln003529	UPLC-MS/MS	C18H26O10	Benzyl β-primeveroside	苯甲酰樱草糖苷	Phenolic acids	酚酸类	Phenolic acids	酚酸类	130622-31-0	31324	61580	66143	3366.2	9	2236.5	1.09831	0.0417401	0.225278	0.0352833	-4.82487	down
Cmjn004337	UPLC-MS/MS	C18H26O10	Benzyl-(2''-O-xylosyl)glucoside	苄基-(2''-O-木糖基)葡萄糖苷	Phenolic acids	酚酸类	Phenolic acids	酚酸类	-	322180	729910	1318600	217470	202430	227250	1.15484	0.185289	0.353083	0.27298	-1.87313	down
Lmhn001773	UPLC-MS/MS	C19H13NO10	Caffeoylnicotinoyltartaric acid	咖啡酰烟酰酒石酸	Phenolic acids	酚酸类	Phenolic acids	酚酸类	-	666120	1648800	470280	128210	84471	282390	1.19494	0.168238	0.343043	0.177751	-2.49207	down
mws0071	UPLC-MS/MS	C21H20O9	Apigenin-4'-O-rhamnoside	芹菜素-4'-O-鼠李糖苷	Flavonoids	黄酮	Flavones	黄酮	133538-77-9	7051	11857	12456	9	9	9	1.40195	0.025785	0.22075	0.00086086	-10.1819	down
Cmbn003192	UPLC-MS/MS	C18H24O11	Regaloside K	王百合苷K	Phenolic acids	酚酸类	Phenolic acids	酚酸类	138772-00-6	148450	128380	121940	53612	40647	32977	1.35638	0.00114992	0.107487	0.319071	-1.64805	down
Lmbp003668	UPLC-MS/MS	C20H18O10	Kaempferol-3-O-arabinoside	山奈酚-3-O-阿拉伯糖苷	Flavonoids	黄酮	Flavonols	黄酮醇	-	389320	432060	365870	9	9	9	1.40257	0.00238862	0.128551	2.27416e-05	-15.4243	down
MWSHY0181	UPLC-MS/MS	C21H20O10	Apigenin-8-C-Glucoside (Vitexin)	芹菜素-8-C-葡萄糖苷 (牡荆素)	Flavonoids	黄酮	Flavones	黄酮	3681-93-4	344870	389620	235630	539810	1139600	1122600	1.23159	0.0834404	0.248154	2.88831	1.53023	up
MWSHY0008	UPLC-MS/MS	C21H20O10	Isovitexin	异维新	Flavonoids	黄酮	Flavones	黄酮	38953-85-4	377590	431520	216780	694270	1334100	1509500	1.25375	0.0691964	0.233277	3.44859	1.786	up
pme0321	UPLC-MS/MS	C21H20O10	Kaempferol-7-O-rhamnoside	山奈酚-7-O-鼠李糖苷	Flavonoids	黄酮	Flavonols	黄酮醇	20196-89-8	12414000	8523100	6830300	35563	18094	9	1.19291	0.0305535	0.225107	0.0019327	-9.01517	down
pmp000413	UPLC-MS/MS	C21H20O10	Genistein-8-C-glucoside	染料木素-8-C-葡萄糖苷	Flavonoids	黄酮	Isoflavones	异黄酮	66026-80-0	502930	483170	304200	861950	1626500	1680500	1.27945	0.0611518	0.230553	3.23099	1.69198	up
mws0919	UPLC-MS/MS	C21H20O10	Kaempferol-3-O-rhamnoside (Afzelin)(Kaempferin)	山奈酚-3-O-鼠李糖苷 (阿福豆苷)(番泻叶山奈苷)	Flavonoids	黄酮	Flavonols	黄酮醇	482-39-3	2662800	5380400	2149400	46640	29619	156360	1.34516	0.0801078	0.245719	0.0228223	-5.45341	down
Lmfn004036	UPLC-MS/MS	C20H18O11	Morin-3-O-lyxoside	桑色素-3-O-来苏糖苷	Flavonoids	黄酮	Flavonols	黄酮醇	-	9033700	7263100	8359600	492720	1160400	1193200	1.35316	0.00152843	0.118022	0.115439	-3.11479	down
mws4183	UPLC-MS/MS	C20H18O11	Quercetin-3-O-arabinoside (Guaijaverin)	槲皮素-3-O-阿拉伯糖苷(番石榴苷)	Flavonoids	黄酮	Flavonols	黄酮醇	22255-13-6	7235000	6360600	8012600	148130	401800	323490	1.37777	0.00397965	0.141357	0.0404208	-4.62876	down
Lmfn004065	UPLC-MS/MS	C20H18O11	Morin-3-O-arabinoside	桑色素-3-O-阿拉伯糖苷	Flavonoids	黄酮	Flavonols	黄酮醇	-	7034000	6706900	8081400	538920	1260200	1414300	1.33853	0.000544789	0.0806287	0.147254	-2.76362	down
mws2186	UPLC-MS/MS	C20H18O11	Avicularin(Quercetin-3-O-α-L-arabinofuranoside)	扁蓄苷(广寄生苷)	Flavonoids	黄酮	Flavonols	黄酮醇	572-30-5	15732000	22902000	13993000	902580	2289700	2500600	1.33517	0.0258291	0.22075	0.108174	-3.20857	down
Hmcp002316	UPLC-MS/MS	C21H20O11	Isorhamnetin-3-O-arabinoside	异鼠李素-3-O-阿拉伯糖苷	Flavonoids	黄酮	Flavonols	黄酮醇	-	112440	701310	141640	923490	2828100	1708500	1.17324	0.100368	0.266447	5.71504	2.51476	up
mws0045	UPLC-MS/MS	C21H20O11	Quercetin-3-O-rhamnoside(Quercitrin)	槲皮素-3-O-鼠李糖苷(槲皮苷)	Flavonoids	黄酮	Flavonols	黄酮醇	522-12-3	61461	5422.4	22566	112710	109170	90349	1.07131	0.0318826	0.225107	3.49057	1.80346	up
MWSHY0136	UPLC-MS/MS	C21H20O11	Kaempferol-3-O-glucoside (Astragalin)	山奈酚-3-O-葡萄糖苷(紫云英苷)	Flavonoids	黄酮	Flavonols	黄酮醇	480-10-4	3916200	4226900	1980400	7011200	11907000	6018400	1.16069	0.0988784	0.264072	2.46324	1.30056	up
MWS20150	UPLC-MS/MS	C21H20O11	Luteolin-7-O-glucoside (Cynaroside)	木犀草素-7-O-葡萄糖苷 (木犀草苷)	Flavonoids	黄酮	Flavones	黄酮	5373-11-5	584470	2412300	475490	18537	37613	88453	1.2787	0.219392	0.373218	0.0416452	-4.58571	down
Hmpp003270	UPLC-MS/MS	C21H20O11	Luteolin-4'-O-glucoside	木犀草素-4'-O-葡萄糖苷	Flavonoids	黄酮	Flavones	黄酮	6920-38-3	2966000	4105700	1450900	5207500	8977800	5395300	1.10837	0.0752911	0.240807	2.29749	1.20006	up
MWS20145	UPLC-MS/MS	C21H22O11	Eriodictyol-7-O-glucoside	圣草酚-7-O-葡萄糖苷	Flavonoids	黄酮	Flavanones	二氢黄酮	38965-51-4	107280	83154	40044	176080	324560	128290	1.10783	0.14329	0.317214	2.72881	1.44827	up
HJN086	UPLC-MS/MS	C21H22O11	Eriodictyol-3'-O-glucoside	圣草酚-3'-O-葡萄糖苷	Flavonoids	黄酮	Flavanones	二氢黄酮	-	91190	24558	11710	211410	243510	324240	1.2315	0.00813055	0.180987	6.11307	2.6119	up
Lmmn004625	UPLC-MS/MS	C21H22O11	Dihydrokaempferol-7-O-glucoside	二氢山奈酚-7-O-葡萄糖苷	Flavonoids	黄酮	Flavanonols	二氢黄酮醇	-	53203	36003	13313	254610	301230	388630	1.32713	0.0134007	0.188646	9.21263	3.20361	up
pmn001415	UPLC-MS/MS	C24H20O9	Catechin-(7,8-bc)-4β-(3,4-dihydroxyphenyl)-dihydro-2-(3H)-one	儿茶素-(7,8-bc)-4β-(3,4-二羟基苯基)-二氢-2-(3h)-酮	Flavonoids	黄酮	Flavanols	黄烷醇类	-	183290	180800	83686	9	9	9	1.39938	0.0450431	0.225278	6.0298e-05	-14.0175	down
mws4167	UPLC-MS/MS	C21H18O12	Luteolin-7-O-glucuronide	木犀草素-7-O-葡萄糖醛酸苷	Flavonoids	黄酮	Flavones	黄酮	29741-10-4	25079	2332.9	7871.2	9750800	14609000	19014000	1.3798	0.0326217	0.225107	1229.31	10.2636	up
Lmzn001894	UPLC-MS/MS	C21H18O12	Kaempferol-3-O-glucuronide	山奈酚-3-O-葡萄糖醛酸苷	Flavonoids	黄酮	Flavonols	黄酮醇	22688-78-4	10135	9	9261	7155100	14338000	14624000	1.25356	0.0388472	0.225278	1861.23	10.862	up
MWSHY0035	UPLC-MS/MS	C21H18O12	Scutellarein-7-O-glucuronide (Scutellarin)	野黄芩素-7-O-葡萄糖醛酸苷 (野黄芩苷)	Flavonoids	黄酮	Flavones	黄酮	27740-01-8	34266	12630	7848.5	8738800	14338000	19559000	1.39186	0.0451884	0.225278	778.814	9.60514	up
Lmdp003171	UPLC-MS/MS	C22H22O11	Azalein (Azaleatin-3-O-rhamnoside)	杜鹃黄苷	Flavonoids	黄酮	Flavonols	黄酮醇	29028-02-2	3660700	4014200	1217400	9	9	9	1.39865	0.0778611	0.243453	3.03633e-06	-18.3292	down
pmp000579	UPLC-MS/MS	C22H22O11	Diosmetin-7-O-galactoside	香叶木素-7-O-半乳糖苷	Flavonoids	黄酮	Flavones	黄酮	-	36870	124590	28986	1407200	2256600	2780800	1.35865	0.0342758	0.225278	33.8395	5.08064	up
Lmjp003655	UPLC-MS/MS	C22H22O11	6-C-MethylKaempferol-3-glucoside	6-甲基山奈酚-3-O-葡萄糖苷	Flavonoids	黄酮	Flavones	黄酮	-	17511	88008	21314	1369800	2576600	3280300	1.35671	0.0511005	0.225278	56.9781	5.83233	up
Hmmp004965	UPLC-MS/MS	C22H22O11	Diosmetin-7-O-glucoside	香叶木素-7-O-葡萄糖苷	Flavonoids	黄酮	Flavones	黄酮	20126-59-4	37913	131840	30153	1329900	2479300	2645700	1.35496	0.0364617	0.225278	32.2897	5.013	up
Hmgp002189	UPLC-MS/MS	C22H22O11	Hispidulin-7-O-Glucoside	高车前素-7-O-葡萄糖苷	Flavonoids	黄酮	Flavones	黄酮	17680-84-1	20547	132340	10105	1255400	2585700	3043900	1.31601	0.0521033	0.225278	42.2413	5.40058	up
pmp001309	UPLC-MS/MS	C21H20O12	6-Hydroxykaempferol-7-O-glucoside	6-羟基山奈酚-7-O-葡萄糖苷	Flavonoids	黄酮	Flavonols	黄酮醇	-	55194	270890	98860	32961	13982	13497	1.20561	0.205296	0.362708	0.142231	-2.8137	down
Lmdp003286	UPLC-MS/MS	C21H20O12	Isohyperoside	异金丝桃苷	Flavonoids	黄酮	Flavonols	黄酮醇	35589-21-0	590970	1508700	479480	6825700	9256400	8734000	1.34521	0.00383892	0.140188	9.62181	3.26631	up
Smgp004575	UPLC-MS/MS	C21H20O12	Quercetin-5-O-β-D-glucoside	槲皮素-5-O-β-D-葡萄糖苷	Flavonoids	黄酮	Flavonols	黄酮醇	-	639570	1453800	488440	6988400	7487500	6526900	1.34728	0.000118633	0.0512276	8.13491	3.02413	up
Zmhn002545	UPLC-MS/MS	C22H24O11	4-O-(6'-O-Glucosylcaffeoyl)-3,4-dihydroxybenzyl alcohol	4-O-(6'-O-葡萄糖基咖啡酰)-3,4-二羟基苄醇	Phenolic acids	酚酸类	Phenolic acids	酚酸类	-	278500	1230700	192060	9	9	9	1.39377	0.230449	0.386308	1.58706e-05	-15.9433	down
Hmmp002121	UPLC-MS/MS	C23H16O11	Isorhamnetin-3-O-gallate	异鼠李素-3-O-没食子酸酯	Flavonoids	黄酮	Flavonols	黄酮醇	-	130420	186740	202370	63852	13708	79395	1.09797	0.0151771	0.188668	0.30211	-1.72686	down
Hmjn008136	UPLC-MS/MS	C30H46O4	Camaldulenic acid	脱氢山楂酸	Terpenoids	萜类	Triterpene	三萜	71850-15-2	195620	307420	58508	395600	609260	693390	1.1036	0.031296	0.225107	3.02423	1.59657	up
pmn001704	UPLC-MS/MS	C30H46O4	2,3-Dihydroxy-5(6),12(13)-diene-ursolic acid	2,3-二羟基-5(6),12(13)-二烯熊果酸	Terpenoids	萜类	Triterpene	三萜	-	2971.3	6351	1460.3	13245	23012	27650	1.26287	0.0413683	0.225278	5.92686	2.56727	up
Lmsn012627	UPLC-MS/MS	C30H46O4	2α,3α-Dihydroxyurs-12,18-dien-28-oic acid	2α,3α-二羟基熊果-12,18-二烯-28-酸	Terpenoids	萜类	Triterpene	三萜	-	9	3750.9	9	15517	23099	29028	1.15434	0.0235672	0.21559	17.9479	4.16575	up
Hmbn005207	UPLC-MS/MS	C30H48O4	hederagenin	常春藤皂苷元	Terpenoids	萜类	Triterpene Saponin	三萜皂苷	465-99-6	283330	909360	279130	54540	102580	207220	1.08928	0.21622	0.370936	0.247544	-2.01424	down
Smpn011792	UPLC-MS/MS	C30H48O4	2,3-dihydroxy-12-ursen-28-oic acid	2,3-二羟基-12-熊果烯-28-酸	Terpenoids	萜类	Triterpene	三萜	-	9	9	9	28022	200820	100820	1.3925	0.159515	0.334869	12209.7	13.5757	up
Lmgp002501	UPLC-MS/MS	C20H27NO12	Dhurrin-6'-O-Glucoside	蜀黍苷-6'-O-葡萄糖苷	Flavonoids	黄酮	Flavones	黄酮	-	25999	16896	17842	115800	59920	185870	1.29797	0.109635	0.277458	5.95337	2.57371	up
Lmhp008233	UPLC-MS/MS	C23H40NO7P	LysoPE 18:4	溶血磷脂酰乙醇胺 18:4	Lipids	脂质	LPE	溶血磷脂酰乙醇胺	-	6216.4	5932	2843.4	9	9	9	1.3961	0.0438222	0.225278	0.00180098	-9.117	down
mws1714	UPLC-MS/MS	C22H18O12	Chicoric Acid	菊苣酸	Phenolic acids	酚酸类	Phenolic acids	酚酸类	70831-56-0	13818	17568	56008	12935	9	9	1.05032	0.200076	0.35943	0.148214	-2.75425	down
Lmhp008801	UPLC-MS/MS	C23H42NO7P	LysoPE 18:3	溶血磷脂酰乙醇胺 18:3	Lipids	脂质	LPE	溶血磷脂酰乙醇胺	-	133690	155100	97753	278530	256890	293260	1.32605	0.00330114	0.140188	2.14382	1.10019	up
Lmhp008589	UPLC-MS/MS	C23H42NO7P	LysoPE 18:3(2n isomer)	溶血磷脂酰乙醇胺 18:3(2n异构)	Lipids	脂质	LPE	溶血磷脂酰乙醇胺	-	131640	121060	122250	265130	249820	344140	1.3639	0.0298921	0.22306	2.29121	1.19611	up
Zmhn004909	UPLC-MS/MS	C21H18O13	3,4-Digalloylshikimic acid	3,4-二没食子酰莽草酸	Phenolic acids	酚酸类	Phenolic acids	酚酸类	-	9	9	9	101940	102620	172410	1.4021	0.0329171	0.225107	13961.9	13.7692	up
Hmjp003123	UPLC-MS/MS	C21H18O13	Quercetin-5-O-glucuronide	槲皮素-5-O-葡萄糖醛酸苷	Flavonoids	黄酮	Flavonols	黄酮醇	-	5237.5	9	9836.8	9960300	10796000	15289000	1.26873	0.0184566	0.20602	2389.75	11.2226	up
Lmfn003760	UPLC-MS/MS	C21H18O13	Quercetin-4'-O-glucuronide	槲皮素-4'-O-葡萄糖醛酸苷	Flavonoids	黄酮	Flavonols	黄酮醇	201463-36-7	9	9	9	4007700	4208500	5803000	1.40269	0.014451	0.188668	519230	18.986	up
Hmcp002207	UPLC-MS/MS	C22H22O12	Isorhamnetin-7-O-glucoside (Brassicin)	异鼠李素-7-O-葡萄糖苷 (蔓菁苷)	Flavonoids	黄酮	Flavonols	黄酮醇	6743-96-0	107210	658250	104230	6499800	7366500	6535600	1.32874	0.00012677	0.0512276	23.4588	4.55206	up
Lmjp003044	UPLC-MS/MS	C22H22O12	Isorhamnetin-3-O-Glucoside	异鼠李素-3-O-葡萄糖苷	Flavonoids	黄酮	Flavonols	黄酮醇	5041-82-7	109020	619440	75073	6966300	8291200	7244200	1.32932	0.000816588	0.096684	28.0035	4.80753	up
Lmjp002906	UPLC-MS/MS	C22H22O12	Rhamnetin-3-O-Glucoside	鼠李素-3-O-葡萄糖苷	Flavonoids	黄酮	Flavonols	黄酮醇	27875-34-9	114530	616590	78051	6851200	8044500	6695600	1.32995	0.00122212	0.108524	26.6832	4.73786	up
Hmgp002148	UPLC-MS/MS	C22H22O12	Nepetin-7-O-alloside	泽兰黄酮-7-O-阿洛糖苷	Flavonoids	黄酮	Flavones	黄酮	-	104690	653560	67816	6003400	7237100	7170400	1.31706	0.000886933	0.0984496	24.7086	4.62694	up
Lmnn002886	UPLC-MS/MS	C23H26O11	1'-O-(3,4-Dihydroxyphenethyl)-O-caffeoyl-glucoside	1'-O-(3,4-二羟基苯乙基)-O-咖啡酰基-葡萄糖苷	Phenolic acids	酚酸类	Phenolic acids	酚酸类	-	9	9	9	24513000	26503000	36585000	1.40272	0.0159846	0.19312	3.24448e+06	21.6296	up
mws1454	UPLC-MS/MS	C23H26O11	Persicoside	桃苷	Flavonoids	黄酮	Flavanones	二氢黄酮	28978-03-2	43038	72606	21452	10385	9	9	1.10729	0.0973979	0.261947	0.0758811	-3.72011	down
Lmpp003296	UPLC-MS/MS	C21H19O13+	Delphinidin-3-O-glucuronide	飞燕草素-3-O-葡萄糖醛酸苷	Flavonoids	黄酮	Anthocyanidins	花青素	-	4422.2	876.25	9793	8099800	9746400	12260000	1.37823	0.014233	0.188646	1994.92	10.9621	up
Li512114	UPLC-MS/MS	C31H50O4	Corosolic Acid Methyl Ester	科罗索酸甲酯	Terpenoids	萜类	Triterpene	三萜	4518-70-1	6596.5	8093.2	5216.5	35052	46810	74888	1.36468	0.0603544	0.230553	7.87443	2.97718	up
Lmmn000214	UPLC-MS/MS	C18H32O15	Solatriose	茄三糖	Others	其它类	Saccharides and Alcohols	糖及醇类	528-40-5	195700	109930	152990	40732	44098	97143	1.1648	0.0445626	0.225278	0.396784	-1.33357	down
pmp001142	UPLC-MS/MS	C24H29NO10	Cimicifugamide A	升麻酰胺 A	Alkaloids	生物碱	Phenolamine	酚胺	-	20511	31793	44484	6524.7	3714	1433.9	1.29075	0.049287	0.225278	0.1206	-3.0517	down
pmp001164	UPLC-MS/MS	C23H24O12	Iristectorin B	鸢尾新苷	Flavonoids	黄酮	Isoflavones	异黄酮	94396-09-5	9	9	9	341650	451730	531030	1.40259	0.0151207	0.188668	49052.2	15.582	up
Lmtn002997	UPLC-MS/MS	C22H22O13	Mearnsetin-3-O-glucoside	3,5,7,3',5'-五羟基-4'-甲氧基黄酮-3-O-葡萄糖苷	Flavonoids	黄酮	Flavones	黄酮	-	2697700	5750000	897040	912120	261150	580570	1.06048	0.214294	0.369861	0.187682	-2.41364	down
Lmgp003989	UPLC-MS/MS	C25H22O11	Dicaffeoylshikimic acid	二咖啡酰基莽草酸	Phenolic acids	酚酸类	Phenolic acids	酚酸类	-	25962000	49093000	9664100	3220300	3987000	7807600	1.14912	0.17756	0.351498	0.177232	-2.49629	down
pmn001642	UPLC-MS/MS	C23H20O13	Kaempferol-3-O-(2''-O-acetyl)glucuronide	山奈酚-3-O-(2''-O-乙酰)葡萄糖醛酸苷	Flavonoids	黄酮	Flavonols	黄酮醇	-	3036400	1025500	2316800	142220	113520	324800	1.31019	0.079685	0.24527	0.0910123	-3.4578	down
Lmsn002288	UPLC-MS/MS	C21H28O14	1-O-Caffeoyl-(6-O-glucosyl)-β-D-glucose	1-O-咖啡酰-6-O-葡萄糖基-β-D-葡萄糖	Phenolic acids	酚酸类	Phenolic acids	酚酸类	-	2762900	2956100	3653600	834920	1113100	1085600	1.37237	0.0101029	0.181558	0.323669	-1.62741	down
pmp001141	UPLC-MS/MS	C25H31NO10	Cimicifugamide	升麻酰胺	Alkaloids	生物碱	Phenolamine	酚胺	-	44540	2418.6	10986	176130	136630	140150	1.18609	0.00186635	0.122764	7.81626	2.96648	up
MWSmce346	UPLC-MS/MS	C25H24O12	1,3-O-Dicaffeoylquinic Acid (Cynarin)	1,3-O-双咖啡酰奎宁酸(洋蓟酸)	Phenolic acids	酚酸类	Phenolic acids	酚酸类	30964-13-7	37274000	87253000	22029000	11402000	8845800	12134000	1.19046	0.192786	0.357087	0.220952	-2.1782	down
MWSmce328	UPLC-MS/MS	C25H24O12	Isochlorogenic acid C	异绿原酸 C	Phenolic acids	酚酸类	Phenolic acids	酚酸类	57378-72-0	39134000	82961000	21640000	11388000	9472100	11472000	1.20225	0.178521	0.351498	0.224942	-2.15237	down
Li512115	UPLC-MS/MS	C25H24O12	Isochlorogenic acid B	异绿原酸 B	Phenolic acids	酚酸类	Phenolic acids	酚酸类	14534-61-3	2977000	6358700	1850400	830030	557370	610890	1.26316	0.151698	0.32583	0.17864	-2.48487	down
pmn001382	UPLC-MS/MS	C25H24O12	Isochlorogenic acid A	异绿原酸 A	Phenolic acids	酚酸类	Phenolic acids	酚酸类	2450-53-5	2587300	8484100	1756100	946180	528610	854760	1.15646	0.239965	0.393879	0.181606	-2.46112	down
pmb0865	UPLC-MS/MS	C26H48NO7P	LysoPC 18:3(2n isomer)	溶血磷脂酰胆碱 18:3(2n异构)	Lipids	脂质	LPC	溶血磷脂酰胆碱	-	784260	1812200	852510	2386000	1947200	2905400	1.14004	0.0448296	0.225278	2.09877	1.06955	up
pmp000531	UPLC-MS/MS	C26H30O11	Phellamurin	黄柏苷	Flavonoids	黄酮	Flavanonols	二氢黄酮醇	52589-11-4	2264500	1004400	1735700	253900	752180	188560	1.19316	0.0547294	0.229052	0.238708	-2.06668	down
Smhp002357	UPLC-MS/MS	C26H30O11	tortoside f	tortoside f	Lignans and Coumarins	木脂素和香豆素	Lignans	木脂素	-	1208300	411800	943230	136140	300320	93315	1.2087	0.0926774	0.25598	0.206675	-2.27457	down
pmn001644	UPLC-MS/MS	C23H20O14	Quercetin-3-O-(2''-acetyl)glucuronide	槲皮素-3-O-(2''-乙酰)葡萄糖醛酸苷	Flavonoids	黄酮	Flavonols	黄酮醇	-	181580	303360	78640	765300	832640	1249400	1.27193	0.0237227	0.21559	5.05224	2.33692	up
Li512111	UPLC-MS/MS	C24H24O13	Isorhamnetin-3-O-(6''-acetylglucoside)	异鼠李素-3-O-(6''-乙酰)葡萄糖苷	Flavonoids	黄酮	Flavonols	黄酮醇	-	456520	1863100	291980	2187700	3061200	12036000	1.10832	0.258788	0.413688	6.61851	2.72651	up
Lmhn003801	UPLC-MS/MS	C25H24O13	Feruloylsinapoyltartaric acid	阿魏酰芥子酰酒石酸	Phenolic acids	酚酸类	Phenolic acids	酚酸类	-	9	9	9	51511	29186	69863	1.40041	0.0507892	0.225278	5576.3	12.4451	up
Lmhp007598	UPLC-MS/MS	C27H52NO7P	LysoPC 19:2(2n isomer)	溶血磷脂酰胆碱 19:2(2n异构)	Lipids	脂质	LPC	溶血磷脂酰胆碱	-	35264	48069	58245	7464.3	7368	32400	1.11343	0.0444939	0.225278	0.333613	-1.58375	down
pmn001375	UPLC-MS/MS	C26H32O12	1-Hydroxypinoresinol-1-O-Glucoside	1-羟基松脂醇-1-O-葡萄糖苷	Lignans and Coumarins	木脂素和香豆素	Lignans	木脂素	81495-71-8	108880	720620	228720	9	9	9	1.39524	0.200156	0.35943	2.55145e-05	-15.2583	down
pmb0608	UPLC-MS/MS	C25H24O14	Chrysoeriol-7-O-(6''-malonyl)glucoside	金圣草黄素-7-O-(6''-丙二酰)葡萄糖苷	Flavonoids	黄酮	Flavones	黄酮	-	21525	28653	5943.8	293620	432380	421060	1.34639	0.0131206	0.188646	20.4388	4.35324	up
pmp000588	UPLC-MS/MS	C25H24O14	Diosmetin-7-O-(6''-malonyl)glucoside	香叶木素-7-O-(6''-O-丙二酰)葡萄糖苷	Flavonoids	黄酮	Flavones	黄酮	-	9	9	9	21358	47406	41280	1.40074	0.0430284	0.225278	4075.7	11.9928	up
Hmln002355	UPLC-MS/MS	C27H34O12	5'-Methoxymatairesinoside	5'-甲氧基罗汉松脂苷	Lignans and Coumarins	木脂素和香豆素	Lignans	木脂素	1691201-82-7	287430	51776	305880	30780	8328.2	24706	1.1821	0.140481	0.315682	0.0989236	-3.33754	down
pmn001365	UPLC-MS/MS	C27H24O13	Salvianolic acid K	丹酚酸 K	Phenolic acids	酚酸类	Phenolic acids	酚酸类	203733-40-8	8492.4	9	9	27032	74962	27394	1.12804	0.122871	0.299804	15.2035	3.92633	up
HJAP064	UPLC-MS/MS	C25H24O15	Isorhamnetin-3-O-(6''-malonyl)glucoside	异鼠李素-3-O-(6''-丙二酰)葡萄糖苷	Flavonoids	黄酮	Flavonols	黄酮醇	-	1315800	6425600	518790	10709000	13237000	24171000	1.16061	0.0669566	0.231097	5.82517	2.5423	up
Zmhp005139	UPLC-MS/MS	C25H24O15	Tamarixetin-3-O-(6''-malonyl)glucoside	柽柳黄素-3-O-(6''-丙二酰)葡萄糖苷	Flavonoids	黄酮	Flavonols	黄酮醇	-	1537600	5506900	533380	10478000	12823000	23939000	1.18298	0.0721251	0.238102	6.23393	2.64014	up
Zmjp003463	UPLC-MS/MS	C26H28O14	Vitexin-2''-O-xyloside	牡荆素-2''-O-木糖苷	Flavonoids	黄酮	Flavonoid carbonoside	黄酮碳糖苷	-	7821700	5168700	6348700	9	9366.5	9	1.29475	0.0138895	0.188646	0.00048526	-11.009	down
Hmcp001858	UPLC-MS/MS	C26H28O14	Kaempferol-3-O-arabinoside-7-O-rhamnoside	山奈酚-3-O-阿拉伯糖苷-7-O-鼠李糖苷	Flavonoids	黄酮	Flavonols	黄酮醇	-	269800	207830	200150	9	9	9	1.40214	0.00939081	0.181558	3.98359e-05	-14.6156	down
Lmnp202580	UPLC-MS/MS	C26H28O14	Apigenin-8-C-(2''-xylosyl)glucoside	芹菜素-8-C-(2''-木糖基)葡萄糖苷	Flavonoids	黄酮	Flavonoid carbonoside	黄酮碳糖苷	-	6815900	6882900	6426400	9	9	9	1.40269	0.000449784	0.0726197	1.3416e-06	-19.5076	down
pmp000411	UPLC-MS/MS	C26H28O14	Genistein-8-C-apiosyl(1→6)glucoside	染料木素-8-C-芹糖基(1→6)葡萄糖苷	Flavonoids	黄酮	Isoflavones	异黄酮	-	731690	510200	623910	2778.2	9	9	1.29872	0.0104256	0.181558	0.00149866	-9.38211	down
Lmnp102580	UPLC-MS/MS	C26H28O14	Apigenin-6-C-(2''-xylosyl)glucoside	芹菜素-6-C-(2''-木糖基)葡萄糖苷	Flavonoids	黄酮	Flavonoid carbonoside	黄酮碳糖苷	-	30044000	30567000	25808000	54680	36995	19010	1.39717	0.00273068	0.137257	0.00128079	-9.60875	down
Lmqp007331	UPLC-MS/MS	C30H26O12	Kaempferol-3-O-(3''-O-p-Coumaroyl)rhamnoside	山奈酚-3-O-(3''-O-对香豆酰)鼠李糖苷	Flavonoids	黄酮	Flavonols	黄酮醇	-	33317	13717	36546	41745	80267	196700	1.04769	0.23258	0.388641	3.81326	1.93102	up
MWSHY0201	UPLC-MS/MS	C27H30O14	Kaempferol-3,7-O-dirhamnoside (Kaempferitrin)	山奈酚-3,7-O-二鼠李糖苷 (山奈苷)	Flavonoids	黄酮	Flavonols	黄酮醇	482-38-2	1674300	1374300	1724500	896.25	9	9	1.3493	0.0046904	0.154142	0.000191542	-12.3501	down
pme0368	UPLC-MS/MS	C27H30O14	Apigenin-7-O-rutinoside (Isorhoifolin)	芹菜素-7-O-芸香糖苷 (异野漆树苷)	Flavonoids	黄酮	Flavones	黄酮	552-57-8	145940	111610	65301	9	9	9	1.39963	0.04405	0.225278	8.36299e-05	-13.5456	down
HJAP148	UPLC-MS/MS	C26H28O15	Kaempferol-3-O-sambubioside	山奈酚-3-O-桑布双糖苷	Flavonoids	黄酮	Flavonols	黄酮醇	27661-51-4	5128600	5029700	4916500	9	9	9	1.40272	0.000148663	0.0512276	1.79107e-06	-19.0907	down
Hmcp001769	UPLC-MS/MS	C26H28O15	Quercetin-3-O-rhamnosyl(1→2)arabinoside	槲皮素-3-O-鼠李糖基(1→2)阿拉伯糖苷	Flavonoids	黄酮	Flavonols	黄酮醇	-	23971000	24769000	20131000	9	14181	9	1.30217	0.0038678	0.140188	0.000206168	-12.2439	down
mws0046	UPLC-MS/MS	C27H32O14	Naringenin-7-O-Neohesperidoside(Naringin)	柚皮素-7-O-新橙皮糖苷(柚皮苷)	Flavonoids	黄酮	Flavanones	二氢黄酮	10236-47-2	78404	37425	15793	9	5351	9	1.14163	0.147705	0.322266	0.0407911	-4.6156	down
Hmgp003641	UPLC-MS/MS	C28H32O14	Chrysoeriol-6-C-rhamnoside-7-O-rhamnoside	金圣草黄素-6-C-鼠李糖苷-7-O-鼠李糖苷	Flavonoids	黄酮	Flavones	黄酮	-	86721	80964	31785	9	9	9	1.3971	0.0623884	0.230553	0.000135359	-12.8509	down
Rfmb056	UPLC-MS/MS	C29H36O13	medioresinol-4'-O-(6'''-acetyl)glucoside	杜仲树脂酚-4'-O-(6'''-乙酰)葡萄糖苷	Lignans and Coumarins	木脂素和香豆素	Lignans	木脂素	-	560310	565140	293160	213770	140540	192800	1.22265	0.0764241	0.241723	0.385666	-1.37458	down
Lmdn004868	UPLC-MS/MS	C29H36O13	Jionoside C	焦地黄苯乙醇苷 C	Phenolic acids	酚酸类	Phenolic acids	酚酸类	120406-33-9	123470	142980	175920	9	9	9	1.40301	0.0106041	0.181558	6.10349e-05	-14	down
mws1290	UPLC-MS/MS	C30H26O13	Kaempferol-3-O-(6''-p-Coumaroyl)glucoside (Tiliroside)	山奈酚-3-O-(6''-对香豆酰)葡萄糖苷 (银锻苷)	Flavonoids	黄酮	Flavones	黄酮	20316-62-5	75327	64160	21594	9	9	9	1.39451	0.0817459	0.248154	0.000167618	-12.5425	down
pmb2586	UPLC-MS/MS	C30H26O13	Gallocatechin-(4α→8)-catechin	没食子儿茶素-(4α→8)-儿茶素	Flavonoids	黄酮	Flavanols	黄烷醇类	-	57515	111130	67902	9	9	3013.5	1.22632	0.041265	0.225278	0.0128156	-6.28595	down
Zmcp003989	UPLC-MS/MS	C27H30O15	Kaempferol-3-O-rhamnosyl(1→2)glucoside	山奈酚-3-O-鼠李糖基(1→2)葡萄糖苷	Flavonoids	黄酮	Flavonols	黄酮醇	-	24522000	24248000	19289000	128270	193580	353520	1.38915	0.00562391	0.160623	0.0099233	-6.65496	down
pmp000593	UPLC-MS/MS	C27H30O15	Luteolin-7-O-rutinoside	木犀草素-7-O-芸香糖苷	Flavonoids	黄酮	Flavones	黄酮	3563-98-2	2273800	9277200	1569400	228330	262260	170290	1.29294	0.23344	0.389286	0.0503704	-4.31128	down
Lmsn002815	UPLC-MS/MS	C27H30O15	Kaempferol-3-O-rutinoside(Nicotiflorin)	山奈酚-3-O-芸香糖苷(烟花苷)	Flavonoids	黄酮	Flavonols	黄酮醇	17650-84-9	1021000	3220400	595410	45222	42378	45611	1.3401	0.193729	0.357087	0.0275411	-5.18227	down
MWSslk254	UPLC-MS/MS	C27H30O15	Kaempferol-3-O-glucorhamnoside	山奈酚-3-O-葡萄糖鼠李糖苷	Flavonoids	黄酮	Flavonols	黄酮醇	40437-72-7	120200	635650	102510	11173	24229	6893	1.25436	0.259951	0.414801	0.0492742	-4.34302	down
pmp001106	UPLC-MS/MS	C27H30O15	Vitexin-2''-O-glucoside	牡荆素-2''-O-葡萄糖苷	Flavonoids	黄酮	Flavonoid carbonoside	黄酮碳糖苷	61360-94-9	2652000	3963400	2428900	7197600	9636200	9698400	1.33633	0.0071625	0.177684	2.93358	1.55266	up
Lmnp202682	UPLC-MS/MS	C27H30O15	5,7,4'-Trihydroxy-8-methoxyflavone-6-C-[Xylosyl-(1-2)]-glucoside	5,7,4'-三羟基-8-甲氧基黄酮-6-C-[木糖-(1-2)]-葡萄糖苷	Flavonoids	黄酮	Flavonoid carbonoside	黄酮碳糖苷	-	268750	10766000	929060	9	9	9	1.38064	0.360989	0.505612	2.25681e-06	-18.7573	down
MWSHY0061	UPLC-MS/MS	C27H30O15	Kaempferol-3-O-neohesperidoside	山奈酚-3-O-新橙皮糖苷	Flavonoids	黄酮	Flavonols	黄酮醇	32602-81-6	7867200	25494000	5226200	1033200	1084100	573560	1.2901	0.200652	0.359958	0.0697342	-3.84199	down
Lmnp102682	UPLC-MS/MS	C27H30O15	Hispidulin-8-C-(2''-O-xylosyl)glucoside	高车前素-8-C-(2''-O-木糖基)葡萄糖苷	Flavonoids	黄酮	Flavonoid carbonoside	黄酮碳糖苷	-	279400	10335000	907670	9	9	9	1.3814	0.359037	0.503607	2.34333e-06	-18.703	down
mws1073	UPLC-MS/MS	C27H30O15	Apigenin-6,8-di-C-glucoside (Vicenin-2)	芹菜素-6,8-二-C-葡萄糖苷 (新西兰牡荆苷 II)	Flavonoids	黄酮	Flavonoid carbonoside	黄酮碳糖苷	23666-13-9	20673000	24786000	18074000	40050000	49532000	49771000	1.35078	0.00486284	0.154142	2.1934	1.13317	up
MWSHY0080	UPLC-MS/MS	C27H30O15	Luteolin-7-O-neohesperidoside (Lonicerin)	木犀草素-7-O-新橘皮糖苷 (忍冬苷)	Flavonoids	黄酮	Flavones	黄酮	25694-72-8	8042700	26515000	5347700	1115800	1041000	694420	1.29157	0.204438	0.362378	0.0714495	-3.80693	down
Lmsp004670	UPLC-MS/MS	C27H30O15	Kaempferol-3-O-glucoside-7-O-rhamnoside	山奈酚-3-O-葡萄糖苷-7-O-鼠李糖苷	Flavonoids	黄酮	Flavonols	黄酮醇	-	7336900	26656000	6364700	998650	978500	671180	1.31059	0.197446	0.358293	0.0656216	-3.92969	down
Hmmp003156	UPLC-MS/MS	C27H30O15	Saponarin(Isovitexin-7-O-glucoside)	皂草苷(异牡荆素-7-O-葡萄糖苷)	Flavonoids	黄酮	Flavones	黄酮	20310-89-8	133600	214400	131020	429970	404860	505020	1.33453	0.0022013	0.128551	2.79706	1.48391	up
mws0791	UPLC-MS/MS	C28H34O14	Poncirin (Isosakuranetin-7-O-neohesperidoside)	枸橘苷	Flavonoids	黄酮	Flavanones	二氢黄酮	14941-08-3	88206	78694	19128	9	9	9	1.39083	0.103094	0.270939	0.000145139	-12.7503	down
Lmtp004044	UPLC-MS/MS	C26H28O16	Quercetin-3-O-apiosyl(1→2)galactoside	槲皮素-3-O-芹糖基(1→2)半乳糖苷	Flavonoids	黄酮	Flavonols	黄酮醇	-	713740	693910	507460	9	9	9	1.40199	0.0104286	0.181558	1.40984e-05	-16.1141	down
Lmjp002596	UPLC-MS/MS	C26H28O16	Quercetin-3-O-sambubioside	槲皮素-3-O-桑布双糖苷	Flavonoids	黄酮	Flavonols	黄酮醇	83048-35-5	695010	558490	560530	9	9	7335.1	1.24926	0.00546939	0.160623	0.00405346	-7.94663	down
Zmjp003031	UPLC-MS/MS	C27H30O16	Orientin-2''-O-galactoside	荭草素-2''-O-半乳糖苷	Flavonoids	黄酮	Flavonoid carbonoside	黄酮碳糖苷	-	3908500	5363300	2192400	1004700	606440	1189600	1.25766	0.0829182	0.248154	0.244303	-2.03326	down
Lmjp002461	UPLC-MS/MS	C27H30O16	Quercetin-3-O-neohesperidoside	槲皮素 3-O-新橘皮糖苷	Flavonoids	黄酮	Flavonols	黄酮醇	117611-67-3	166550	203450	69934	23312	13248	34120	1.25904	0.0874168	0.252836	0.16066	-2.63791	down
Zmhp003716	UPLC-MS/MS	C27H30O16	Rhodionidin	Rhodionidin	Flavonoids	黄酮	Flavonols	黄酮醇	-	19990000	19271000	10309000	4965400	2812900	6117600	1.24919	0.0516522	0.225278	0.280329	-1.83481	down
Zmhn002032	UPLC-MS/MS	C28H34O15	4-O-(6'-O-Glucosylcaffeoylglucosyl)-4-hydroxybenzyl alcohol	4-O-(6'-O-葡萄糖基咖啡酰葡萄糖基)-4-羟基苄醇	Phenolic acids	酚酸类	Phenolic acids	酚酸类	-	1002700	1021700	686340	240710	165000	229110	1.35922	0.0199393	0.207081	0.234187	-2.09427	down
Cmdn003997	UPLC-MS/MS	C25H38O17	6'-O-α-D-galactopyranosylbarlerin	6'-O-α-D-半乳糖基(8-O-乙酰山栀苷甲酯)	Terpenoids	萜类	Monoterpenoids	倍萜	927691-89-2	1572500	1244900	818300	249000	152710	334670	1.30909	0.0410073	0.225278	0.202541	-2.30371	down
pmp000241	UPLC-MS/MS	C27H28O17	Luteolin-6-C-(2''-glucuronyl)glucoside	木犀草素-6-C-(2''-葡萄糖醛酸基)葡萄糖苷	Flavonoids	黄酮	Flavones	黄酮	-	9	9	9	17708	53511	69768	1.3967	0.0924883	0.255855	5221.74	12.3503	up
Lmzn001664	UPLC-MS/MS	C27H28O17	Kaempferol-3-O-glucuronide-7-O-glucoside	山奈酚-3-O-葡萄糖醛酸苷-7-O-葡萄糖苷	Flavonoids	黄酮	Flavonols	黄酮醇	-	9	9	9	1271800	256400	1256100	1.39652	0.109818	0.277458	103122	16.654	up
Lmsp003939	UPLC-MS/MS	C28H32O16	Isorhamnetin-3-O-galactoide-7-O-rhamnoside	异鼠李素-3-O-半乳糖苷-7-O-鼠李糖苷	Flavonoids	黄酮	Flavonols	黄酮醇	-	8294700	38643000	9143300	52569000	61819000	62167000	1.14755	0.0460167	0.225278	3.14821	1.65453	up
Lmnp002584	UPLC-MS/MS	C28H32O16	Hispidulin-8-C-(2''-O-glucosyl)glucoside	高车前素-8-C-(2''-O-葡萄糖基)葡萄糖苷	Flavonoids	黄酮	Flavonoid carbonoside	黄酮碳糖苷	-	1770700	10597000	1905000	14774000	22422000	19256000	1.15783	0.0210936	0.211714	3.95524	1.98377	up
Lmsp004045	UPLC-MS/MS	C28H32O16	Isorhamnetin-3-O-glucoside-7-O-rhamnoside	异鼠李素-3-O-葡萄糖苷-7-O-鼠李糖苷	Flavonoids	黄酮	Flavonols	黄酮醇	-	7877800	34925000	9299700	52684000	61656000	59819000	1.17528	0.03417	0.225278	3.34262	1.74098	up
Lmmp002963	UPLC-MS/MS	C28H32O16	6-C-Methylquercetin-3-O-rutinoside	6-C-甲基槲皮素-3-O-芸香糖苷	Flavonoids	黄酮	Flavonols	黄酮醇	-	53529	213080	42481	367280	557830	491280	1.21756	0.00928093	0.181558	4.58245	2.19612	up
pme1540	UPLC-MS/MS	C28H32O16	Isorhamnetin-3-O-neohesperidoside	异鼠李素-3-O-新橙皮糖苷	Flavonoids	黄酮	Flavonols	黄酮醇	55033-90-4	1636400	9097200	1565700	12986000	17632000	16217000	1.15708	0.0255651	0.22075	3.80794	1.92901	up
pmp000127	UPLC-MS/MS	C28H32O16	Chrysoeriol-6,8-di-C-glucoside	金圣草黄素-6,8-二-C-葡萄糖苷	Flavonoids	黄酮	Flavonoid carbonoside	黄酮碳糖苷	-	9	9	9	149600	214260	266200	1.40229	0.0248333	0.22075	23335.6	14.5102	up
Zmhn002574	UPLC-MS/MS	C28H32O16	Rhamnazin 3-Glucosyl-Arabinofuranoside	鼠李秦素-3-O-葡萄糖-阿拉伯糖	Flavonoids	黄酮	Flavones	黄酮	-	16061	22343	21168	9	9	9	1.4027	0.00930628	0.181558	0.000453233	-11.1075	down
HJAP026	UPLC-MS/MS	C28H32O16	Chrysoeriol-6-C-glucoside-4'-O-glucoside	金圣草黄素-6-C-葡萄糖苷-4'-O-葡萄糖苷	Flavonoids	黄酮	Flavonoid carbonoside	黄酮碳糖苷	-	1895100	10080000	2210800	17295000	22432000	19241000	1.19244	0.0149034	0.188668	4.1568	2.05547	up
Lmcn005735	UPLC-MS/MS	C29H36O15	Methylhesperidin	甲基橙皮苷	Flavonoids	黄酮	Flavones	黄酮	11013-97-1	32856	22467	13863	11701	9	9	1.05138	0.052641	0.225278	0.169384	-2.56163	down
Zmhn000666	UPLC-MS/MS	C29H36O15	Magnoloside A	厚朴苷 A	Phenolic acids	酚酸类	Phenolic acids	酚酸类	113557-95-2	296910	715500	458580	9	9	9	1.40156	0.0565893	0.230553	1.8355e-05	-15.7335	down
pmp001311	UPLC-MS/MS	C27H30O17	6-Hydroxykaempferol-7,6'-O-Diglucoside	6-羟基山奈酚-7,6'-O-二葡萄糖苷	Flavonoids	黄酮	Flavonols	黄酮醇	-	222080	432470	126980	2638400	1947900	5135600	1.3273	0.0900717	0.253921	12.4396	3.63687	up
Zmcp002666	UPLC-MS/MS	C27H30O17	Quercetin-3,7-Di-O-glucoside	槲皮素-3,7-二-O-葡萄糖苷	Flavonoids	黄酮	Flavonols	黄酮醇	-	198820	284390	79905	1664400	1341300	3410800	1.31865	0.092322	0.255855	11.3947	3.51029	up
Zmhp003784	UPLC-MS/MS	C27H30O17	Rhodioflavonoside	Rhodioflavonoside	Flavonoids	黄酮	Flavonols	黄酮醇	-	9	9	9	250710	157250	340940	1.40152	0.0422875	0.225278	27737	14.7595	up
pmp001310	UPLC-MS/MS	C27H30O17	6-Hydroxykaempferol-3,6-O-Diglucoside	6-羟基山奈酚-3,6-O-二葡萄糖苷	Flavonoids	黄酮	Flavonols	黄酮醇	-	156490	368860	142450	1028800	1073400	1900200	1.31045	0.0514718	0.225278	5.99341	2.58338	up
pmb0645	UPLC-MS/MS	C28H34O16	Hesperetin-6-C-glucoside-7-O-glucoside	橙皮素-6-C-葡萄糖苷-7-O-葡萄糖苷	Flavonoids	黄酮	Flavonoid carbonoside	黄酮碳糖苷	-	11764	26760	2433.9	143200	112900	289080	1.25398	0.0882864	0.253241	13.3107	3.73452	up
pmb0618	UPLC-MS/MS	C28H34O16	Hesperetin-8-C-glucoside-3'-O-glucoside	橙皮素-8-C-葡萄糖苷-3'-O-葡萄糖苷	Flavonoids	黄酮	Flavonoid carbonoside	黄酮碳糖苷	-	45228	108280	19842	361850	326720	1009300	1.25672	0.147345	0.321876	9.79446	3.29197	up
Hmlp002975	UPLC-MS/MS	C28H30O17	Isorhamnetin-3-O-glucuronide-7-O-rhamnoside	异鼠李素-3-O-葡萄糖醛酸苷-7-O-鼠李糖苷	Flavonoids	黄酮	Flavonols	黄酮醇	-	7522	9	6634.2	212380	150410	323780	1.0971	0.0473047	0.225278	48.4688	5.59898	up
Lmmp002560	UPLC-MS/MS	C27H28O18	Quercetin-3-O-(2''-O-glucosyl)glucuronide	槲皮素-3-O-(2''-O-葡萄糖基)葡萄糖醛酸苷	Flavonoids	黄酮	Flavonols	黄酮醇	-	9	9	9	315320	244500	843100	1.39973	0.131631	0.307783	51960	15.6651	up
Hmcp001578	UPLC-MS/MS	C28H32O17	Isorhamnetin-3,7-O-diglucoside	异鼠李素-3,7-O-二葡萄糖苷	Flavonoids	黄酮	Flavonols	黄酮醇	6758-51-6	31880	158270	29960	4001100	1448600	3887800	1.33705	0.0671703	0.231097	42.422	5.40674	up
Lmhp002800	UPLC-MS/MS	C28H32O17	2'-Hydoxy,5-methoxyGenistein-4',7-O-diglucoside	2'-羟基-5-甲氧基染料木素-4',7-O-二葡萄糖	Flavonoids	黄酮	Isoflavones	异黄酮	-	55480	126690	13842	249670	312080	300330	1.15593	0.00830509	0.180987	4.3981	2.13688	up
Lmsp003252	UPLC-MS/MS	C28H32O17	Isorhamnetin-3-O-sophoroside	异鼠李素-3-O-槐糖苷	Flavonoids	黄酮	Flavonols	黄酮醇	-	124030	403360	62711	11210000	5337700	10879000	1.35043	0.0420952	0.225278	46.478	5.53848	up
mws1153	UPLC-MS/MS	C31H38O16	2'-Acetylacteoside	2'-乙酰毛蕊花糖苷	Phenolic acids	酚酸类	Phenolic acids	酚酸类	94492-24-7	223330	188950	81381	22764	17292	20864	1.32818	0.0775394	0.243221	0.123405	-3.01853	down
pmp001276	UPLC-MS/MS	C33H56O14	1-Linolenoyl-rac-glycerol-diglucoside	1-亚麻酰单甘油酯-二葡萄糖苷	Lipids	脂质	Free fatty acids	游离脂肪酸	-	1054300	1167100	1103400	2103000	2392200	2487400	1.38626	0.00569777	0.160623	2.10016	1.0705	up
Lmhp008513	UPLC-MS/MS	C33H56O14	2-α-Linolenoyl-glycerol-1,3-di-O-glucoside	2-α-亚麻酸甘油酯-1,3-二-O-葡萄糖苷	Lipids	脂质	Glycerol ester	甘油酯	-	59807	77825	52621	122380	139130	166000	1.32711	0.0103793	0.181558	2.24706	1.16804	up
Lmyn005812	UPLC-MS/MS	C33H56O14	Gingerglycolipid A	姜糖脂 A	Lipids	脂质	Glycerol ester	甘油酯	145937-22-0	544030	341530	210090	1250700	1511800	1607100	1.31577	0.00168842	0.122764	3.98813	1.99571	up
Lmhp008744	UPLC-MS/MS	C33H56O14	1-α-Linolenoyl-glycerol-2,3-di-O-glucoside	1-α-亚麻酸甘油酯-2,3-二-O-葡萄糖苷	Lipids	脂质	Glycerol ester	甘油酯	-	119320	86112	33987	217140	169500	175590	1.11605	0.0291489	0.222536	2.34831	1.23162	up
Lmyn006011	UPLC-MS/MS	C33H58O14	Gingerglycolipid B	姜糖脂 B	Lipids	脂质	Glycerol ester	甘油酯	88168-90-5	74051	89476	98775	391450	209690	363310	1.3259	0.0515065	0.225278	3.67687	1.87848	up
Lmhp009190	UPLC-MS/MS	C33H58O14	2-Linoleoylglycerol-1,3-di-O-glucoside	2-亚油酰甘油酯-1,3-二-O-葡萄糖苷	Lipids	脂质	Glycerol ester	甘油酯	-	78797	152950	163280	258440	216330	643070	1.06654	0.214729	0.37005	2.82978	1.50069	up
Lmhp009384	UPLC-MS/MS	C33H58O14	1-Linoleoylglycerol-2,3-di-O-glucoside	1-亚油酰甘油酯-2,3-二-O-葡萄糖苷	Lipids	脂质	Glycerol ester	甘油酯	-	9892.7	16573	27893	161760	46847	42612	1.11577	0.233237	0.389286	4.6215	2.20836	up
Lmyn006221	UPLC-MS/MS	C33H60O14	Gingerglycolipid C	姜糖脂 C	Lipids	脂质	Glycerol ester	甘油酯	-	3056.7	5900.4	4642.9	10945	6061.1	11450	1.10967	0.0841183	0.24899	2.09236	1.06513	up
Hmzn004430	UPLC-MS/MS	C32H40O17	Sesamolinol 4'-O-B-D-Glucosyl (1->6)-O-B-D-Glucoside	芝麻林素酚 4'-O-β-D-葡萄糖基 (1->6)-O-β-D-葡萄糖苷	Lignans and Coumarins	木脂素和香豆素	Lignans	木脂素	-	279640	1205100	261400	2001400	1244500	3341000	1.12319	0.10152	0.267904	3.77226	1.91543	up
Hmcp001947	UPLC-MS/MS	C31H34O19	Isorhamnetin-3-O-(6''-malonyl)glucoside-7-O-rhamnoside	异鼠李素-3-O-(6''-丙二酰)葡萄糖苷-7-O-鼠李糖苷	Flavonoids	黄酮	Flavonols	黄酮醇	-	1002300	1079200	485880	4601300	2374200	10003000	1.23813	0.16716	0.342022	6.61316	2.72534	up
Hmcp001658	UPLC-MS/MS	C31H34O20	Isorhamnetin-3-O-(6''-malonyl)glucoside-7-O-glucoside	异鼠李素-3-O-(6''-丙二酰)葡萄糖苷-7-O-葡萄糖苷	Flavonoids	黄酮	Flavonols	黄酮醇	-	55087	71340	7262.2	851190	450660	1686600	1.27075	0.120088	0.294582	22.3537	4.48244	up
Xmyp004678	UPLC-MS/MS	C32H38O19	Kaempferol-3-O-(2-O-Xylosyl-6-O-Rhamnosyl)Glucoside	山奈酚-3-O-(2''-O-木糖基-6''-O-鼠李糖基)葡萄糖苷	Flavonoids	黄酮	Flavonols	黄酮醇	-	837640	571160	605390	9	9	9	1.40211	0.0151912	0.188668	1.34049e-05	-16.1869	down
Zmlp003063	UPLC-MS/MS	C33H40O19	Luteolin-7-O-(2''-O-rhamnosyl)rutinoside	木犀草素-7-O-(2''-O-鼠李糖基)芸香糖苷	Flavonoids	黄酮	Flavones	黄酮	-	4525600	9186700	3887500	315020	171710	132250	1.36942	0.0769727	0.242342	0.0351697	-4.82952	down
Lmsp003881	UPLC-MS/MS	C33H40O19	Kaempferol-3-O-rutinoside-7-O-rhamnoside	山奈酚-3-O-芸香糖苷-7-O-鼠李糖苷	Flavonoids	黄酮	Flavonols	黄酮醇	-	2040100	2141700	1832200	99702	69164	50607	1.39317	0.00179606	0.122764	0.0364937	-4.77621	down
Hmdp103165	UPLC-MS/MS	C33H40O19	Clitorin	蝶豆素	Flavonoids	黄酮	Flavones	黄酮	55804-74-5	2332400	2313000	1800500	150730	53008	72362	1.37599	0.00591204	0.162174	0.0428334	-4.54512	down
mws1035	UPLC-MS/MS	C33H40O19	Kaempferol-3-O-robinoside-7-O-rhamnoside (Robinin)	山奈酚-3-O-刺槐糖苷-7-O-鼠李糖苷 (刺槐苷)	Flavonoids	黄酮	Flavonols	黄酮醇	301-19-9	3893600	7405200	3492100	245210	130640	108640	1.37579	0.0615435	0.230553	0.032756	-4.9321	down
Hmqp002870	UPLC-MS/MS	C32H38O20	Luteolin-7-O-Sophoroside-5-O-arabinoside	木犀草素-7-O-槐糖苷-5-O-阿拉伯糖苷	Flavonoids	黄酮	Flavones	黄酮	-	81862	24234	40456	9	9	9	1.39714	0.104424	0.272138	0.000184235	-12.4062	down
Hmgp003409	UPLC-MS/MS	C33H40O20	Quercetin-3-O-Soph-7-O-Rha b	Quercetin-3-O-Soph-7-O-Rha b	Flavonoids	黄酮	Flavones	黄酮	-	998990	2081400	363400	72052	33388	47068	1.30707	0.160136	0.335776	0.0442849	-4.49704	down
pmp001105	UPLC-MS/MS	C33H40O20	Kaempferol-3-O-neohesperidoside-7-O-glucoside	山奈酚-3-O-新橙皮糖苷-7-O-葡萄糖苷	Flavonoids	黄酮	Flavonols	黄酮醇	-	58777	49508	88731	9	6600.8	9	1.17021	0.0295693	0.222536	0.0335952	-4.8956	down
Zmgp002857	UPLC-MS/MS	C33H40O20	Quercetin-3-O-α-rhamnosyl (1→2)-[α-rhamnosyl (1→6)]-β-glucoside	槲皮素-3-O-α-鼠李糖基(1→2)-[α-鼠李糖基(1→6)]-β-葡萄糖苷	Flavonoids	黄酮	Flavonols	黄酮醇	-	1054000	2145700	375400	63287	36167	61028	1.30905	0.15796	0.333179	0.0448888	-4.4775	down
Zmmp003591	UPLC-MS/MS	C33H41O20+	Delphinidin-3-O-(2'''-O-p-coumaroyl)rutinoside	飞燕草素-3-O-(2'''-O-对香豆酰)芸香糖苷	Flavonoids	黄酮	Anthocyanidins	花青素	-	186040	100440	130450	9	9	9	1.40145	0.031051	0.225107	6.47591e-05	-13.9146	down
pmn001505	UPLC-MS/MS	C41H64O13	Oleanolic acid-3-O-xylosyl(1→3)glucuronide	齐墩果酸-3-O-木糖基(1→3)葡萄糖醛酸苷	Terpenoids	萜类	Triterpene Saponin	三萜皂苷	-	4671200	2375400	8200500	25968	19990	9	1.17198	0.0959565	0.260978	0.0030148	-8.37372	down
HJN098	UPLC-MS/MS	C42H68O13	Azukisaponin I	赤豆皂苷 I	Terpenoids	萜类	Triterpene Saponin	三萜皂苷	82793-02-0	12513000	13008000	27244000	38409	14359	18767	1.39584	0.067994	0.231775	0.00135573	-9.52672	down
Hmmp006067	UPLC-MS/MS	C42H68O13	Oleanolic acid-3-O-glucosyl(1→2)glucoside	齐墩果酸-3-O-葡萄糖基(1→2)葡萄糖苷	Terpenoids	萜类	Triterpene Saponin	三萜皂苷	-	132180	67612	391420	9	9	9	1.39727	0.184651	0.353083	4.56689e-05	-14.4184	down
Hmcp001589	UPLC-MS/MS	C34H42O21	Isorhamnetin-3-O-rutinoside-4'-O-glucoside	异鼠李素-3-O-芸香糖苷-4'-O-葡萄糖苷	Flavonoids	黄酮	Flavonols	黄酮醇	111393-97-6	25749	123350	18365	351100	146220	345930	1.16167	0.05969	0.230553	5.03541	2.33211	up
pmb0620	UPLC-MS/MS	C34H42O21	Chrysoeriol-6,8-di-C-glucoside-7-O-glucoside	金圣草黄素-6,8-二-C-葡萄糖苷-7-O-葡萄糖苷	Flavonoids	黄酮	Flavones	黄酮	-	13236	16852	8146	138090	58255	140860	1.33337	0.0653683	0.230553	8.81951	3.1407	up
Lmsp003790	UPLC-MS/MS	C34H42O21	Isorhamnetin-3-O-sophoroside-7-O-rhamnoside	异鼠李素-3-O-槐糖苷-7-O-鼠李糖苷	Flavonoids	黄酮	Flavonols	黄酮醇	41328-75-0	704410	108900	74889	2200600	4199100	1273400	1.20732	0.113085	0.282474	8.63894	3.11085	up
mws1150	UPLC-MS/MS	C35H46O20	Echinacoside	松果菊苷	Phenolic acids	酚酸类	Phenolic acids	酚酸类	82854-37-3	31654	7851.1	6120.8	274290	524100	114220	1.29102	0.135672	0.310107	20.002	4.32207	up
Cmdn004237	UPLC-MS/MS	C35H46O20	Betonyoside E	Betonyoside E	Phenolic acids	酚酸类	Phenolic acids	酚酸类	181301-30-4	56525	31016	9482.2	627600	1287700	310740	1.30268	0.132202	0.307783	22.9434	4.52001	up
Zmcp102720	UPLC-MS/MS	C47H76O17	Bupleurumwenchuanense	2''-O-β-D-吡喃木糖基-柴胡皂苷b2	Terpenoids	萜类	Triterpene Saponin	三萜皂苷	-	68122	82293	57318	9	9	9	1.40197	0.010734	0.181558	0.000129975	-12.9095	down
Zmcp102719	UPLC-MS/MS	C47H76O17	saikosaponin K	柴胡皂苷K	Terpenoids	萜类	Triterpene Saponin	三萜皂苷	-	78749	102070	74918	9	9	9	1.40225	0.00976355	0.181558	0.000105577	-13.2094	down
Zmcp102716	UPLC-MS/MS	C47H76O17	Rotundifolioside A	圆叶柴胡果苷A	Terpenoids	萜类	Triterpene Saponin	三萜皂苷	-	71300	89502	94496	9	9	9	1.40294	0.00679222	0.172328	0.000105759	-13.2069	down
Zmcp102715	UPLC-MS/MS	C47H76O17	Rotundifolioside H	圆叶柴胡果苷H	Terpenoids	萜类	Triterpene Saponin	三萜皂苷	-	89027	103190	106260	9	9	9	1.40293	0.00283386	0.137257	9.04592e-05	-13.4324	down
Hmmp005664	UPLC-MS/MS	C47H76O17	Akeboside Stf	木通皂苷 Stf	Terpenoids	萜类	Triterpene Saponin	三萜皂苷	-	12335	8489.6	24641	9	9	9	1.39953	0.0897264	0.253921	0.000593856	-10.7176	down
Zmcp007018	UPLC-MS/MS	C47H74O18	Durupcoside A	Durupcoside A	Terpenoids	萜类	Triterpene Saponin	三萜皂苷	107656-74-6	13913	9788.6	9573.6	9	9	9	1.40127	0.0158473	0.192772	0.000811415	-10.2673	down
Lmsp004090	UPLC-MS/MS	C43H48O23	Isorhamnetin-3-O-(6''-O-p-coumarol)sophoroside-7-O-rhamnoside	异鼠李素-3-O-(6''-O-对香豆酰)槐糖苷-7-O-鼠李糖苷	Flavonoids	黄酮	Flavonols	黄酮醇	-	24799	31362	24905	188640	546150	46687	1.10417	0.256715	0.412603	9.64001	3.26903	up
Lmmn005092	UPLC-MS/MS	C47H72O20	Medicagenic acid-3-O-glucuronide-28-O-rhamnosyl(1,2)-arabinoside	苜蓿酸-3-O-葡萄糖醛酸苷-28-O-鼠李糖基(1,2)-阿拉伯糖苷	Terpenoids	萜类	Triterpene Saponin	三萜皂苷	-	100080	472460	484810	9	9	9	1.39765	0.107917	0.276566	2.55355e-05	-15.2571	down
XMW0958	GC-MS	C11H23I	1-Iodoundecane	1-碘十一烷	Hydrocarbons	烃类	-	-	4282-44-4	337235	220760	302872	149465	80008.9	91180.1	1.28014	0.0169794	0.195112	0.372478	-1.42477	down
KMW0713	GC-MS	C17H28O2	2,6,10-Dodecatrien-1-ol, 3,7,11-trimethyl-, acetate, (E,E)-	（E，E）-醋酸法呢酯	Ester	酯	-	-	4128-17-0	54785.7	22247.3	43229.8	9	9	9	1.39982	0.0520913	0.225278	0.000224508	-12.1209	down
XMW0265	GC-MS	C17H36	Tetradecane, 2,6,10-trimethyl-	2,6,10-三甲基十四烷	Hydrocarbons	烃类	-	-	14905-56-7	41299.5	114344	49833.4	11898.8	8988.56	7645.8	1.32095	0.124424	0.30182	0.138863	-2.84827	down
D130	GC-MS	C16H16O2	Benzeneacetic acid, 2-phenylethyl ester	苯乙酸2-苯乙基酯	Ester	酯	-	-	102-20-5	9	9	9	5334	12428	8357	1.39958	0.0515629	0.225278	967.37	9.91792	up
XMW1264	GC-MS	C15H26O2	Acetic acid, 1-methyl-3-(2,6,6-trimethylcyclohex-1-enyl)propyl ester	4-（2,6,6-三甲基环己烯-1-基）丁烷-2-基乙酸酯	Ester	酯	-	-	86756-12-9	833031	404169	729907	1.88685e+06	1.90772e+06	3.47458e+06	1.27665	0.0707127	0.236063	3.69535	1.88571	up
KMW0638	GC-MS	C15H26O2	Geranyl isovalerate	异戊酸香叶基酯	Ester	酯	-	-	109-20-6	929575	342457	466109	1.6784e+06	1.6358e+06	3.35708e+06	1.23667	0.0898595	0.253921	3.83817	1.94042	up
NMW0280	GC-MS	C15H26O2	2-Furanmethanol, tetrahydro-.alpha.,.alpha.,5-trimethyl-5-(4-methyl-3-cyclohexen-1-yl)-, [2S-[2.alpha.,5.beta.(R*)]]-	[2S-[2α，5bR*）]]-四氢-α，α，5-三甲基-5-（4-甲基-3-环己烯-1-基）-2-呋喃甲醇	Terpenoids	萜类	-	-	26184-88-3	67152.5	52045.8	71686	21514	13683.8	17808.7	1.36224	0.00898957	0.181558	0.277689	-1.84846	down
XMW1184	GC-MS	C15H20O2	Butanoic acid, 3-methyl-, 8-decene-4,6-diynyl ester, (Z)-	（Z）-8-癸烯-4,6-二炔-1-基3-甲基丁酸酯	Ester	酯	-	-	126693-81-0	23747	12505	23013.2	9500	4143	6383.01	1.2186	0.0525832	0.225278	0.337905	-1.56531	down
D347	GC-MS	C14H28O2	n-Capric acid isobutyl ester	正癸酸异丁酯	Ester	酯	-	-	30673-38-2	32267.6	63474.7	36420.4	7248.32	5251.01	4939.37	1.36445	0.0589153	0.230553	0.131949	-2.92195	down
KMW0642	GC-MS	C16H34	Hexadecane	十六烷	Hydrocarbons	烃类	-	-	544-76-3	41468.8	23649	68562.3	23146.9	14151.9	21559.1	1.04642	0.192064	0.357087	0.440289	-1.18348	down
XMW0159	GC-MS	C16H34	2,6,10-Trimethyltridecane	2,6,10-三甲基十三烷	Hydrocarbons	烃类	-	-	3891-99-4	1.45764e+06	558754	551815	1.99721e+06	1.77636e+06	1.97152e+06	1.15587	0.0653177	0.230553	2.237	1.16156	up
D314	GC-MS	C14H26O2	8-Dodecen-1-ol, acetate, (Z)-	（Z）-8-十二烯-1-醇乙酸酯	Ester	酯	-	-	28079-04-1	534721	229869	324175	948193	856020	1.73347e+06	1.23245	0.0875787	0.252836	3.24926	1.70011	up
XMW0916	GC-MS	C11H15Br	(5-bromopentyl)-Benzene,	（5-溴戊基）-苯	Halogenated hydrocarbons	卤代烃	-	-	14469-83-1	5.31446e+06	2.15572e+06	3.15858e+06	9.02763e+06	1.01548e+07	5.34198e+06	1.12198	0.0653114	0.230553	2.30736	1.20624	up
KMW0558	GC-MS	C14H24O2	1,5-Dimethyl-1-vinyl-4-hexenyl butyrate	丁酸芳基酯	Ester	酯	-	-	78-36-4	4.51705e+06	3.77489e+07	4.84659e+06	2.86725e+06	1.81663e+06	1.33298e+06	1.03172	0.339853	0.483249	0.127712	-2.96903	down
D241	GC-MS	C15H26O	3-Cyclohexene-1-methanol, .alpha.,4-dimethyl-.alpha.-(4-methyl-3-pentenyl)-, [R-(R*,R*)]-	[R-（R *，R *）]-α，4-二甲基-α-（4-甲基-3-戊烯基）-3-环己烯-1-甲醇	Terpenoids	萜类	-	-	23178-88-3	1.27453e+06	444570	905972	3.4107e+06	3.56485e+06	6.50845e+06	1.28396	0.0625114	0.230553	5.13662	2.36082	up
KMW0687	GC-MS	C15H26O	1H-Cycloprop[e]azulen-4-ol, decahydro-1,1,4,7-tetramethyl-, [1aR-(1a.alpha.,4.beta.,4a.beta.,7.alpha.,7a.beta.,7b.alpha.)]-	（+）-香豆素醇	Terpenoids	萜类	-	-	552-02-3	351290	213407	571053	200911	117323	185413	1.07082	0.174491	0.349771	0.443449	-1.17316	down
KMW0671	GC-MS	C15H26O	(1R,4R)-1-methyl-4-(6-Methylhept-5-en-2-yl)cyclohex-2-enol	姜油烯醇	Alcohol	醇	-	-	58334-55-7	1.31041e+06	479680	935776	3.56663e+06	3.72052e+06	6.72149e+06	1.2915	0.0603706	0.230553	5.13915	2.36153	up
XMW0842	GC-MS	C15H26O	Palustrol (Ledum)	喇叭茶醇	Terpenoids	萜类	-	-	5986-49-2	93741.5	36966.1	102931	15433.2	12719.1	13868	1.30234	0.0901683	0.253921	0.179852	-2.47512	down
XMW0558	GC-MS	C15H26O	1,4-Methanoazulen-9-ol, decahydro-1,5,5,8a-tetramethyl-, [1R-(1.alpha.,3a.beta.,4.alpha.,8a.beta.,9S*)]-	[1R-（1α，3aβ，4α，8aβ，9S *） ]-十氢-1,5,5,8a-四甲基-1,4-甲烷七氮烯-9-醇	Terpenoids	萜类	-	-	465-24-7	28482	21541	27089	14639	10831	11887	1.32965	0.0111706	0.183694	0.484451	-1.04558	down
XMW0027	GC-MS	C15H26O	Ledol	勒多尔	Terpenoids	萜类	-	-	577-27-5	2.42157e+06	1.16949e+06	2.72513e+06	548500	425085	422395	1.31438	0.073833	0.239262	0.221016	-2.17778	down
KMW0656	GC-MS	C15H26O	2-Naphthalenemethanol, decahydro-.alpha.,.alpha.,4a-trimethyl-8-methylene-, [2R-(2.alpha.,4a.alpha.,8a.beta.)]-	β-乙醛	Terpenoids	萜类	-	-	473-15-4	7223.4	3861.08	9778.8	15783.5	29142.9	19496.7	1.21779	0.0509989	0.225278	3.08787	1.62661	up
XMW0854	GC-MS	C15H26O	4a(2H)-Naphthalenol, 1,3,4,5,6,8a-hexahydro-4,7-dimethyl-1-(1-methylethyl)-, (1S,4S,4aS,8aR)-	（1S，4S，4aS，8aR）-1,3,4,5,6,8a-六氢-4,7-二甲基-1-（1-甲基乙基）-4a（2H）-萘	Terpenoids	萜类	-	-	73365-77-2	1.08043e+06	477169	848445	2.84785e+06	2.67036e+06	5.14252e+06	1.29219	0.0682535	0.231775	4.43082	2.14757	up
XMW0705	GC-MS	C15H26O	2-Naphthalenemethanol, 1,2,3,4,4a,5,6,8a-octahydro-.alpha.,.alpha.,4a,8-tetramethyl-, [2R-(2.alpha.,4a.alpha.,8a.beta.)]-	[2R-（2α，4a ，8aβ]]-1,2,3,4,4a，5,6,8a-八氢-α，α，4a，8-四甲基-2-萘甲醇	Terpenoids	萜类	-	-	473-16-5	22009.5	10386.9	17990.4	5466.62	2919.63	4110.28	1.29521	0.0598536	0.230553	0.248012	-2.01152	down
NMW0350	GC-MS	C13H18O3	(S,E)-4-Hydroxy-3,5,5-trimethyl-4-(3-oxobut-1-en-1-yl)cyclohex-2-enone	（S，E）-4-羟基-3,5,5-三甲基-4-（3-氧代丁-1-烯-1-基）环己-2-烯酮	Terpenoids	萜类	-	-	39763-33-2	19221.3	6380.36	17446.2	7885.15	3319.07	5471.43	1.01632	0.150322	0.324405	0.387374	-1.3682	down
XMW1017	GC-MS	C16H28	1,E-11,Z-13-Hexadecatriene	Z-13-十六碳三烯-E-11-1	Hydrocarbons	烃类	-	-	80634-97-5	1.38827e+06	619723	1.1216e+06	3.07697e+06	3.12106e+06	5.58719e+06	1.27422	0.0648007	0.230553	3.76574	1.91293	up
XMW1167	GC-MS	C15H24O	(1R,3E,7E,11R)-1,5,5,8-Tetramethyl-12-oxabicyclo[9.1.0]dodeca-3,7-diene	（1R，3E，7E，11R）-1,5,5,8-四甲基-12-氧杂双环[9.1.0]十二烷基-3,7-二烯	Terpenoids	萜类	-	-	19888-34-7	594160	228179	326483	1.12168e+06	1.01884e+06	2.08164e+06	1.24087	0.0822697	0.248154	3.67521	1.87783	up
D337	GC-MS	C15H24O	2H-2a,7-Methanoazuleno[5,6-b]oxirene, octahydro-3,6,6,7a-tetramethyl-	α-雪松烯环氧化物	Terpenoids	萜类	-	-	29597-36-2	66318	26606.9	63795.2	105865	87134.8	170453	1.08581	0.0938799	0.257698	2.31912	1.21358	up
XMW0054	GC-MS	C15H24O	Farnesene epoxide, E-	E-法呢烯环氧化物	Terpenoids	萜类	-	-	83637-40-5	726437	303655	588020	1.92035e+06	1.98041e+06	3.4987e+06	1.29316	0.0578232	0.230553	4.5729	2.19311	up
w05	GC-MS	C15H24O	2,6,10-Dodecatrienal, 3,7,11-trimethyl-	3,7,11-三甲基-2,6,10-十二烷基	Terpenoids	萜类	-	-	19317-11-4	163756	47727.4	198013	9	9	21649.5	1.10968	0.1012	0.267858	0.0529125	-4.24025	down
KMW0636	GC-MS	C15H24O	1H-3a,7-Methanoazulen-5-ol, octahydro-3,8,8-trimethyl-6-methylene-	雪松醇	Alcohol	醇	-	-	28231-03-0	596755	271904	442451	1.03924e+06	895819	1.81498e+06	1.20815	0.0924832	0.255855	2.86021	1.51612	up
D428	GC-MS	C15H24O	6-Methyl-2-(4-methylcyclohex-3-en-1-yl)hepta-1,5-dien-4-ol	6-甲基-2-（4-甲基环己-3-烯-1-基）庚-1,5-二烯-4-醇	Terpenoids	萜类	-	-	38142-56-2	1.19094e+06	580120	1.01642e+06	2.09794e+06	1.52477e+06	3.06099e+06	1.16322	0.0857251	0.252066	2.39775	1.26168	up
D254	GC-MS	C15H24O	2H-2,4a-Methanonaphthalen-8(5H)-one, 1,3,4,6,7,8a-hexahydro-1,1,5,5-tetramethyl-	1，1,3,4,6,7,8a-六氢-1,1,5,5-四甲基-2H-2,4a-甲烷萘-8（5H）酮	Terpenoids	萜类	-	-	23787-90-8	399302	149052	331357	961461	974041	1.67494e+06	1.26349	0.0501619	0.225278	4.10412	2.03707	up
XMW0203	GC-MS	C14H20O2	2,5-di-tert-Butyl-1,4-benzoquinone	1,5-二叔丁基-1,4-苯醌	Aromatics	芳烃	-	-	2460-77-7	169350	102342	288556	100308	58140.5	91579.6	1.04349	0.193008	0.357087	0.44628	-1.16398	down
XMW0205	GC-MS	C15H10N2	Benzimidazo[2,1-a]isoquinoline	苯并咪唑[2,1-a]异喹啉	Heterocyclic compound	杂环化合物	-	-	239-44-1	40133.3	21844.1	44031.2	21634.1	12827.4	17484.1	1.11634	0.105345	0.272138	0.490013	-1.02911	down
w44	GC-MS	C11H20O4	Butanoic acid, 2-butoxy-1-methyl-2-oxoethyl ester	丁酸2-丁氧基-1-甲基-2-氧乙酯	Ester	酯	-	-	7492-70-8	92816.5	24409.3	78254.3	1.31457e+06	1.86944e+06	1.26464e+06	1.35385	0.0172731	0.196647	22.7575	4.50827	up
w42	GC-MS	C14H30O	2-Ethyl-1-dodecanol	2-乙基-1-十二烷醇	Alcohol	醇	-	-	19780-33-7	46006.6	24227.1	72886.2	25007	16158.3	21559.1	1.04134	0.193887	0.357087	0.438264	-1.19013	down
XMW1345	GC-MS	C13H26O2	Octanoic acid, 3-methylbutyl ester	3-甲基丁酯辛酸	Ester	酯	-	-	2035-99-6	1.68849e+06	590315	568793	2.39051e+06	2.10442e+06	2.35652e+06	1.15583	0.0615821	0.230553	2.40604	1.26666	up
XMW0419	GC-MS	C15H32	Tetradecane, 2-methyl-	二甲基十六烷	Hydrocarbons	烃类	-	-	1560-95-8	107879	53999.2	114584	40749.3	17242.2	22482.8	1.22817	0.0622592	0.230553	0.291086	-1.78048	down
XMW0200	GC-MS	C15H32	Tetradecane, 4-methyl-	四甲基十四烷	Hydrocarbons	烃类	-	-	25117-24-2	100796	47948.2	106567	32477	18397.8	19766.7	1.26061	0.0735495	0.238801	0.276687	-1.85367	down
KMW0640	GC-MS	C14H28O	Tetradecanal	十四烷基醛	Aldehyde	醛	-	-	124-25-4	39667.4	19298.4	32722.4	71255	53720.1	109034	1.1859	0.0869387	0.252836	2.55222	1.35175	up
WMW0130	GC-MS	C15H30	1-Pentadecene	1-十五碳烯	Hydrocarbons	烃类	-	-	13360-61-7	162069	121069	171527	68259.7	33972.4	34050.3	1.30267	0.00671366	0.172328	0.299742	-1.73821	down
XMW0062	GC-MS	C13H22O2	2-Propenoic acid, 2-methyl-, 3,3,5-trimethylcyclohexyl ester	甲基丙烯酸 3,3,5-三甲基环己酯	Ester	酯	-	-	7779-31-9	50969.3	26669.7	41021.8	236015	333027	214098	1.36292	0.0228203	0.21559	6.59982	2.72243	up
D354	GC-MS	C13H22O2	3-Cyclohexene-1-carboxAldehyde, 4-(4-hydroxy-4-methylpentyl)-	4-（4-羟基-4-甲基戊基）-3-环己烯-1-甲醛	Aldehyde	醛	-	-	31906-04-4	2.60445e+06	1.05132e+06	1.67721e+06	4.61918e+06	4.0456e+06	9.76458e+06	1.19825	0.131237	0.307783	3.45573	1.78899	up
XMW1113	GC-MS	C9H20FO2P	2-Octyl methylphosphonofluoridate	2-辛基甲基氟膦酸酯	Ester	酯	-	-	22925-97-9	31397.3	25000.1	24238.3	55059.7	63271.5	56635	1.36985	0.000788485	0.096684	2.16983	1.11758	up
NMW0258	GC-MS	C12H17NO2	Fenobucarb	异丁威	Ester	酯	-	-	3766-81-2	768560	318097	595386	1.22723e+06	1.01061e+06	2.03734e+06	1.14915	0.0937206	0.257659	2.54166	1.34577	up
XMW1336	GC-MS	C11H13NO3	N-Benzyloxy-2-carbomethoxyaziridine	1-苯基甲氧基氮丙啶-2-羧酸甲酯	Ester	酯	-	-	53084-33-6	4.06884e+06	9.935e+06	4.36614e+06	1.87136e+06	833993	1.14274e+06	1.26276	0.123062	0.299804	0.209477	-2.25514	down
XMW0195	GC-MS	C15H26	1H-Cycloprop[e]azulene, decahydro-1,1,4,7-tetramethyl-, [1aR-(1a.alpha.,4.beta.,4a.beta.,7.beta.,7a.beta.,7b.alpha.)]-	十氢-1,1,4,7-四甲基-1H-环丙烯腈	Terpenoids	萜类	-	-	28580-43-0	50946	1.46657e+06	67409.9	11845.4	9	9	1.15049	0.379954	0.52108	0.00748515	-7.06175	down
XMW1364	GC-MS	C15H26	7-Octylidenebicyclo[4.1.0]heptane	7-辛二烯双环[4.1.0]庚烷	Terpenoids	萜类	-	-	82253-11-0	2.57871e+06	3.23272e+06	2.35131e+06	1.14662e+06	601174	776052	1.32372	0.00673646	0.172328	0.309191	-1.69343	down
D216	GC-MS	C14H22O	.alpha.-Irone	甲基Α-紫罗兰酮	Ketone	酮	-	-	79-69-6	2.94449e+07	1.71309e+07	2.45732e+07	1.54619e+07	6.24022e+06	9.09495e+06	1.15308	0.0440427	0.225278	0.432853	-1.20805	down
NMW0265	GC-MS	C13H18O2	Ibuprofen	布洛芬	Acid	酸	-	-	15687-27-1	1.08143e+06	770370	873673	2.08108e+06	2.18462e+06	3.89491e+06	1.29708	0.0878377	0.252836	2.9942	1.58217	up
XMW1016	GC-MS	C13H18O2	(4,4-Dimethyl-2,4,5,6-tetrahydro-1H-inden-2-yl)acetic Acid	（4,4-二甲基-2,4,5,6-四氢-1H-茚满-2-基）乙酸	Acid	酸	-	-	113522-67-1	479675	169101	668328	119889	87320.9	98933.5	1.1871	0.146016	0.319758	0.232437	-2.10509	down
XMW0040	GC-MS	C12H14O3	Phenol, 2-methoxy-4-(1-propenyl)-, acetate	乙酸异丁香酚酯	Ester	酯	-	-	93-29-8	337749	125208	294312	799547	731015	1.31119e+06	1.24292	0.050079	0.225278	3.75263	1.9079	up
XMW1153	GC-MS	C15H24	1R,4R,7R,11R-1,3,4,7-Tetramethyltricyclo[5.3.1.0(4,11)]undec-2-ene	1R，4R，7R，11R-1,3,4,7-四甲基三环[5.3.1.0（4,11）]十一烷基-2-烯	Terpenoids	萜类	-	-	137235-59-7	373767	1.23828e+06	415454	263074	173930	120804	1.12235	0.222016	0.376215	0.275121	-1.86186	down
XMW0197	GC-MS	C15H24	(1S,4S,4aS)-1-Isopropyl-4,7-dimethyl-1,2,3,4,4a,5-hexahydronaphthalene	（1S，4S，4aS）-1-异丙基-4,7-二甲基-1,2,3,4,4a，5-六氢萘	Terpenoids	萜类	-	-	267665-20-3	1.65517e+07	8.08877e+06	1.69983e+07	6.1416e+06	2.87057e+06	3.68648e+06	1.22993	0.0670948	0.231097	0.304971	-1.71325	down
KMW0582	GC-MS	C15H24	.beta.-Guaiene	β-番石榴烯	Terpenoids	萜类	-	-	88-84-6	1.12641e+07	6.26907e+06	1.23083e+07	3.87391e+06	2.2706e+06	2.41471e+06	1.29008	0.0538702	0.229052	0.286823	-1.80177	down
XMW0382	GC-MS	C15H24	isoledene	（-)-异喇叭烯	Terpenoids	萜类	-	-	95910-36-4	1.38489e+06	3.89791e+07	1.63897e+06	483238	332737	270142	1.05826	0.388815	0.525809	0.0258581	-5.27324	down
XMW0743	GC-MS	C15H24	(-)-Aristolene	（-）-马兜铃烯	Terpenoids	萜类	-	-	6831-16-9	3.77768e+07	1.30674e+07	1.45776e+07	5.01716e+07	4.33539e+07	4.81163e+07	1.12599	0.0784559	0.243665	2.16505	1.1144	up
XMW0549	GC-MS	C15H24	(1S,4aR,7R)-1,4a-Dimethyl-7-(prop-1-en-2-yl)-1,2,3,4,4a,5,6,7-octahydronaphthalene	（1S，4aR，7R）-1,4a-二甲基-7-（丙烯基）-1,2,3,4,4a，5,6,7-八氢萘	Terpenoids	萜类	-	-	52026-55-8	7.28666e+06	2.41975e+06	2.37292e+06	1.01706e+07	8.8776e+06	1.00549e+07	1.14536	0.0656586	0.230553	2.40933	1.26863	up
XMW0182	GC-MS	C15H24	(3S,3aS,6R,8aS)-3,8,8-Trimethyl-7-methyleneoctahydro-1H-3a,6-methanoazulene	吡嗪烯	Terpenoids	萜类	-	-	31145-21-8	6.58314e+07	2.2194e+07	2.15943e+07	9.36978e+07	8.12593e+07	9.0522e+07	1.15002	0.0631989	0.230553	2.42182	1.27609	up
KMW0623	GC-MS	C15H24	1,5-Cyclodecadiene, 1,5-dimethyl-8-(1-methylethylidene)-, (E,E)-	大根香叶烯B	Terpenoids	萜类	-	-	15423-57-1	96865.6	195526	93990.9	85723.1	32086.6	61871.2	1.01123	0.163587	0.340021	0.465034	-1.10459	down
XMW0469	GC-MS	C15H24	(1R,3aS,8aS)-7-Isopropyl-1,4-dimethyl-1,2,3,3a,6,8a-hexahydroazulene	愈创木6,9-二烯	Terpenoids	萜类	-	-	36577-33-0	3.77815e+07	1.30698e+07	1.45776e+07	5.01724e+07	4.33539e+07	4.81194e+07	1.12595	0.0784827	0.243665	2.16488	1.11429	up
WMW0052	GC-MS	C15H24	(E)-1-Methyl-4-(6-methylhept-5-en-2-ylidene)cyclohex-1-ene	（E）-1-甲基-4-（6-甲基庚-5-烯-2-亚烷基）环己-1-烯	Terpenoids	萜类	-	-	53585-13-0	2.29087e+07	1.30791e+07	1.99216e+07	1.13944e+07	5.6674e+06	7.07341e+06	1.19432	0.0466398	0.225278	0.431684	-1.21195	down
KMW0548	GC-MS	C15H24	[1aR-(1a.alpha.,4.alpha.,4a.beta.,7b.alpha.)]-1a,2,3,4,4a,5,6,7b-octahydro-1,1,4,7-tetramethyl-1H-Cycloprop[e]azulene	(-)-alpha-古芸烯	Terpenoids	萜类	-	-	489-40-7	2.99545e+06	1.35024e+07	3.22238e+06	2.73871e+06	1.00948e+06	846811	1.03666	0.281419	0.432725	0.23301	-2.10154	down
XMW0817	GC-MS	C15H24	(1S,5S,6R)-6-Methyl-2-methylene-6-(4-methylpent-3-en-1-yl)bicyclo[3.1.1]heptane	（1S，5S，6R）-6-甲基-2-亚甲基-6-（4-甲基戊-3-烯-1-基）双环[3.1.1]庚烷	Terpenoids	萜类	-	-	15438-94-5	155295	123068	161088	67308.9	32347.7	35074.2	1.30617	0.00341383	0.140188	0.306588	-1.70563	down
XMW0147	GC-MS	C15H24	1-Methyl-4-(6-methylhept-5-en-2-yl)cyclohexa-1,3-diene	1-甲基-4-（6-甲基庚-5-烯-2-基）环己-1,3-二烯	Terpenoids	萜类	-	-	451-55-8	3.41197e+06	1.567e+06	2.20265e+06	5.28792e+06	6.14839e+06	3.19646e+06	1.08344	0.0863633	0.252836	2.03753	1.02682	up
WMW0008	GC-MS	C15H24	Longifolene	长叶烯	Terpenoids	萜类	-	-	475-20-7	1.54698e+07	6.70611e+07	1.65898e+07	1.42642e+07	5.256e+06	4.4034e+06	1.03656	0.276857	0.429605	0.241358	-2.05075	down
XMW0388	GC-MS	C15H24	(4aR,8aR)-5,8a-dimethyl-3-propan-2-ylidene-1,2,4,4a,7,8-hexahydronaphthalene	（4aR，8aR）-5,8a-二甲基-3-丙烷-2-亚烷基-1,2,4,4a，7,8-六氢萘	Terpenoids	萜类	-	-	6813-21-4	1.43913e+07	1.72094e+07	1.65091e+07	3.85985e+06	2.58709e+06	2.61937e+06	1.3854	0.000946741	0.0989066	0.188451	-2.40774	down
XMW1408	GC-MS	C15H24	1H-Cyclopropa[a]naphthalene, 1a,2,3,3a,4,5,6,7b-octahydro-1,1,3a,7-tetramethyl-, [1aR-(1a.alpha.,3a.alpha.,7b.alpha.)]-	[1aR-（1aα。，3a。 ，7b.α。）]-1a，2,3,3a，4,5,6,7b-八氢-1,1,3a，7-四甲基-1H-环丙烷[a]萘	Terpenoids	萜类	-	-	489-29-2	1.05275e+06	3.75689e+06	1.12742e+06	806234	313528	260345	1.11217	0.226752	0.382249	0.232457	-2.10497	down
D341	GC-MS	C15H24	Naphthalene, decahydro-1,6-bis(methylene)-4-(1-methylethyl)-, (4.alpha.,4a.alpha.,8a.alpha.)-	十氢-1,6-双（亚甲基）-4-（1-甲基乙基）-，（4α，4aα，8aα）-萘	Terpenoids	萜类	-	-	30021-46-6	1.47103e+06	727894	1.51746e+06	546688	260688	330638	1.23415	0.0659394	0.230553	0.306215	-1.70738	down
XMW0825	GC-MS	C15H24	Bicyclo[3.1.1]heptane, 6-methyl-2-methylene-6-(4-methyl-3-pentenyl)-, [1R-(1.alpha.,5.alpha.,6.beta.)]-	[1R-（1α，5α，6β）]-6-甲基-2-亚甲基-6-（4-甲基-3-戊烯基）-双环[3.1.1]庚烷	Terpenoids	萜类	-	-	55123-21-2	2.84667e+07	9.37638e+06	9.90961e+06	3.89563e+07	3.37736e+07	3.75941e+07	1.13527	0.0722234	0.238102	2.31032	1.20809	up
KMW0614	GC-MS	C15H24	Cubenene	卡丁二烯	Terpenoids	萜类	-	-	29837-12-5	1.26438e+07	7.82692e+06	1.1106e+07	6.2866e+06	3.16313e+06	3.86841e+06	1.22545	0.0295267	0.222536	0.421772	-1.24546	down
XMW0629	GC-MS	C15H24	3H-3a,7-Methanoazulene, 2,4,5,6,7,8-hexahydro-1,4,9,9-tetramethyl-, [3aR-(3a.alpha.,4.beta.,7.alpha.)]-	莎草烯	Terpenoids	萜类	-	-	2387-78-2	2.78637e+06	1.31698e+07	2.96119e+06	2.66236e+06	965124	815203	1.01516	0.293773	0.442925	0.234848	-2.0902	down
WMW0053	GC-MS	C15H24	Benzene, 1-(1,5-dimethylhexyl)-4-methyl-	1-（1,5-二甲基己基）-4-甲基-苯	Terpenoids	萜类	-	-	1461-02-5	2.87074e+07	9.53111e+06	1.022e+07	3.9224e+07	3.38978e+07	3.76926e+07	1.1345	0.0725387	0.238131	2.28679	1.19332	up
XMW0948	GC-MS	C15H24	Valerena-4,7(11)-diene	（4S，7R，7aR）-2,4,5,6,7,7a-六氢-3,7-二甲基-4-（2-甲基-1-丙烯-1-基）-1H-茚	Terpenoids	萜类	-	-	351222-66-7	4.86297e+06	2.26292e+06	4.73804e+06	1.39463e+06	704027	826162	1.27429	0.0643586	0.230553	0.24653	-2.02016	down
WMW0004	GC-MS	C15H24	Ylangene	衣兰烯	Terpenoids	萜类	-	-	14912-44-8	1.42116e+06	3.90662e+07	1.67055e+06	512359	350972	269216	1.05634	0.388343	0.525809	0.0268644	-5.21816	down
KMW0556	GC-MS	C15H24	Naphthalene, decahydro-4a-methyl-1-methylene-7-(1-methylethenyl)-, [4aR-(4a.alpha.,7.alpha.,8a.beta.)]-	β-芹子烯	Terpenoids	萜类	-	-	17066-67-0	1.0278e+06	431972	613700	1.94371e+06	2.14152e+06	1.09096e+06	1.15126	0.0645502	0.230553	2.49639	1.31984	up
XMW0131	GC-MS	C15H24	Di-epi-.alpha.-cedrene	双表-α-雪松烯	Terpenoids	萜类	-	-	50894-66-1	1.2763e+07	5.4842e+07	1.35553e+07	1.17536e+07	4.34337e+06	3.63952e+06	1.03538	0.276809	0.429605	0.243179	-2.03991	down
KMW0478	GC-MS	C15H24	cis-.beta.-Farnesene	（Z）-β-法呢烯	Terpenoids	萜类	-	-	28973-97-9	8.60035e+06	3.27616e+06	3.30191e+06	1.17801e+07	1.04324e+07	1.14637e+07	1.1534	0.0668039	0.231097	2.21869	1.14971	up
KMW0596	GC-MS	C15H24	Alloaromadendrene	阿古玛烯	Terpenoids	萜类	-	-	25246-27-9	3.34512e+06	1.79286e+06	3.8104e+06	1.40766e+06	685972	837616	1.22596	0.0677072	0.231775	0.327573	-1.61011	down
XMW0033	GC-MS	C15H24	(1R,3aS,4aS,8aS)-1,4,4,6-Tetramethyl-1,2,3,3a,4,4a,7,8-octahydrocyclopenta[1,4]cyclobuta[1,2]benzene	（1R，3aS，4aS，8aS）-1,4,4,6-四甲基-1,2,3,3a，4,4a，7,8-八氢环戊[1,4]环丁[1,2]苯	Terpenoids	萜类	-	-	94535-52-1	1.28235e+07	5.50986e+07	1.36051e+07	1.17861e+07	4.36511e+06	3.66281e+06	1.03563	0.27686	0.429605	0.243035	-2.04076	down
KMW0537	GC-MS	C15H24	Cyclohexane, 1-ethenyl-1-methyl-2,4-bis(1-methylethenyl)-, (1.alpha.,2.beta.,4.beta.)-	β-榄香烯	Terpenoids	萜类	-	-	33880-83-0	2.12999e+06	9.01441e+06	2.26217e+06	2.03507e+06	863650	693548	1.01005	0.285168	0.43585	0.267948	-1.89997	down
WMW0003	GC-MS	C15H24	Eremophilene	佛术烯	Terpenoids	萜类	-	-	10219-75-7	295487	271877	298785	129990	63908.9	69878.1	1.32159	0.00503392	0.154142	0.30454	-1.7153	down
D345	GC-MS	C14H20O	(3aR,6R,8aR)-7,7-Dimethyl-8-methylenehexahydro-1H-3a,6-methanoazulen-3(2H)-one	（3aR，6R，8aR）-7,7-二甲基-8-亚甲基六氢-1H-3a，6-甲磺腈-3（2H）-酮	Ester	酯	-	-	30557-76-7	1.16335e+06	537025	955926	2.01837e+06	1.50318e+06	3.00669e+06	1.16409	0.0835082	0.248154	2.45764	1.29727	up
XMW0552	GC-MS	C13H16O2	2,2'-Isopropylidenebis(5-methylfuran)	2,2'-异亚丙基双（5-甲基呋喃）	Heterocyclic compound	杂环化合物	-	-	59212-75-8	2.02158e+07	6.74712e+06	7.05017e+06	2.87267e+07	2.45406e+07	2.73898e+07	1.14695	0.0635936	0.230553	2.37135	1.24571	up
XMW0841	GC-MS	C13H16O2	1-Penten-3-one, 1-(4-methoxyphenyl)-4-methyl-	1-（4-甲氧基苯基）-4-甲基-1-戊烯-3-酮	Ketone	酮	-	-	103-13-9	1.33592e+06	1.1564e+07	1.52211e+06	629046	350125	310460	1.11979	0.324464	0.470792	0.0894206	-3.48325	down
XMW0992	GC-MS	C15H22	(2R,8R,8aS)-8,8a-Dimethyl-2-(prop-1-en-2-yl)-1,2,3,7,8,8a-hexahydronaphthalene	（2R，8R，8aS）-8,8a-二甲基-2-（丙-1-烯-2-基）-1,2,3,7,8,8a-六氢萘	Terpenoids	萜类	-	-	5090-61-9	3.2554e+06	1.47329e+06	3.08915e+06	1.00399e+06	460065	606467	1.24888	0.0682024	0.231775	0.264846	-1.91678	down
XMW0262	GC-MS	C15H22	1,1,7,7a-Tetramethyl-1a,2,6,7,7a,7b-hexahydro-1H-cyclopropa[a]naphthalene	1,1,7,7a-四甲基-1a，2,6,7,7a，7b-六氢-1H-环丙烷[a]萘	Terpenoids	萜类	-	-	154098-14-3	387346	124751	168056	542223	472797	547269	1.14581	0.0586348	0.230553	2.29697	1.19973	up
D310	GC-MS	C15H22	(8R,8aS)-8,8a-Dimethyl-2-(propan-2-ylidene)-1,2,3,7,8,8a-hexahydronaphthalene	（8R，8aS）-8,8a-二甲基-2-（丙烷-2-亚烷基）-1,2,3,7,8,8a-六氢萘	Terpenoids	萜类	-	-	27840-40-0	515467	686242	758468	2.67677e+06	1.34735e+06	923469	1.08963	0.198127	0.358689	2.52405	1.33574	up
KMW0542	GC-MS	C12H24O2	Decanoic acid, ethyl ester	癸酸乙酯	Ester	酯	-	-	110-38-3	3948.89	17354.8	4115.76	3467.58	1670.96	1190.22	1.02322	0.287101	0.437266	0.248973	-2.00594	down
KMW0704	GC-MS	C15H20	.alpha.-Calacorene	Α-二去氢菖蒲烯	Terpenoids	萜类	-	-	21391-99-1	26661.3	36633.9	31437.9	9134.7	6924.65	6385.81	1.37867	0.00941084	0.181558	0.236931	-2.07746	down
XMW0136	GC-MS	C15H20	4-Isopropyl-6-methyl-1-methylene-1,2,3,4-tetrahydronaphthalene	4-异丙基-6-甲基-1-亚甲基-1,2,3,4-四氢萘	Terpenoids	萜类	-	-	50277-34-4	1.31975e+06	1.86066e+06	1.35517e+06	409865	385540	477112	1.37376	0.0226215	0.21559	0.280564	-1.8336	down
XMW0422	GC-MS	C14H30	3,5-Dimethyldodecane	3,5-二甲基十二烷	Hydrocarbons	烃类	-	-	107770-99-0	12548	10758.5	16859.7	56333.7	18224.9	47723.2	1.12494	0.137894	0.313172	3.0444	1.60616	up
w10	GC-MS	C13H26O	2-Undecanone, 6,10-dimethyl-	6,10-二甲基-2-十一烷酮	Ketone	酮	-	-	1604-34-8	17093.1	67210.9	24540.1	17302.8	8975.33	7275.11	1.04301	0.246637	0.400758	0.308269	-1.69774	down
w45	GC-MS	C14H28	2-Tetradecene, (E)-	（E）-2-十四碳烯	Hydrocarbons	烃类	-	-	35953-54-9	549607	2.24142e+06	597658	542615	232113	181790	1.00592	0.280352	0.432209	0.282268	-1.82486	down
XMW1260	GC-MS	C13H24O	1-Cyclohexene-1-propanol, .alpha.,2,6,6-tetramethyl-	α，2,6,6-四甲基-1-环己烯-1-丙醇	Alcohol	醇	-	-	3293-47-8	3.98232e+06	1.3052e+06	1.26784e+06	5.84425e+06	5.03056e+06	5.62318e+06	1.15663	0.0576892	0.230553	2.51672	1.33154	up
NMW0142	GC-MS	C12H20O2	Cyclohexanol, 1-methyl-4-(1-methylethylidene)-, acetate	1-甲基-4-（1-甲基亚乙基）-环己醇乙酸酯	Ester	酯	-	-	10235-63-9	9	9	9	27150.1	19573.5	39835.4	1.40115	0.03952	0.225278	3205.89	11.6465	up
KMW0518	GC-MS	C12H20O2	2,6-Octadien-1-ol, 3,7-dimethyl-, acetate, (Z)-	乙酸橙花酯	Ester	酯	-	-	141-12-8	53975.3	28313.9	49432.3	27703.8	7845.72	9035.43	1.13514	0.0486571	0.225278	0.338479	-1.56286	down
KMW0501	GC-MS	C12H20O2	Dihydrocarvyl acetate	乙酸二氢戊酯	Ester	酯	-	-	20777-49-5	90510.1	5811.2	59755.8	1.00362e+06	2.53038e+06	1.63254e+06	1.27609	0.063273	0.230553	33.1025	5.04887	up
XMW0961	GC-MS	C12H20O2	Bornyl acetate	乙酸龙脑酯	Ester	酯	-	-	76-49-3	104179	68255.8	103206	291572	108252	343307	1.06146	0.1572	0.33229	2.69601	1.43083	up
WMW0219	GC-MS	C12H20O2	Isobornyl acetate	乙酸异冰片酯	Ester	酯	-	-	125-12-2	97789.7	63871.7	101475	278016	101375	323891	1.04838	0.159399	0.334869	2.67269	1.41829	up
WMW0016	GC-MS	C12H20O2	(-)-Bornyl acetate	（-）-乙酸龙脑酯	Terpenoids	萜类	-	-	5655-61-8	104179	68444.8	110439	291572	108252	343757	1.04327	0.160728	0.336222	2.62691	1.39337	up
XMW0803	GC-MS	C12H20O2	Iso-3-thujyl acetate	异-3-叔丁基乙酸酯	Ester	酯	-	-	62181-90-2	138665	89274.8	215431	280532	250944	457459	1.11185	0.0869329	0.252836	2.23049	1.15736	up
WMW0089	GC-MS	C13H22O	5,9-Undecadien-2-one, 6,10-dimethyl-	6,10-二甲基-5,9-十一碳烯-2-酮	Ketone	酮	-	-	689-67-8	2.34498e+07	8.36913e+06	8.08687e+06	3.3415e+07	2.92994e+07	3.24016e+07	1.15793	0.0610338	0.230553	2.38351	1.25309	up
KMW0563	GC-MS	C13H22O	5,9-Undecadien-2-one, 6,10-dimethyl-, (E)-	（E）-6,10-二甲基-5,9-十一碳烯-2-酮	Ketone	酮	-	-	3796-70-1	2.34498e+07	8.34608e+06	8.08734e+06	3.3415e+07	2.92994e+07	3.24016e+07	1.1578	0.0610803	0.230553	2.38486	1.25391	up
XMW0198	GC-MS	C13H22O	3-Buten-2-ol, 4-(2,6,6-trimethyl-2-cyclohexen-1-yl)-, (3E)-	（3E）-4-（2,6,6-三甲基-2-环己烯-1-基）-3-丁烯-2-醇	Alcohol	醇	-	-	25312-34-9	1.17455e+07	4.04109e+06	4.09341e+06	1.64337e+07	1.44264e+07	1.59528e+07	1.14974	0.0655543	0.230553	2.35477	1.23559	up
XMW0423	GC-MS	C13H22O	6,8-Nonadien-2-one, 8-methyl-5-(1-methylethyl)-, (E)-	（E）-8-甲基-5-（1-甲基乙基）-6,8-壬二烯-2-酮	Ketone	酮	-	-	54868-48-3	341369	8.78486e+06	355356	72307.8	9	9	1.13265	0.380759	0.521446	0.00762803	-7.03447	down
D425	GC-MS	C13H20O	3-Cyclohexene-1-carboxAldehyde, 4-(4-methyl-3-pentenyl)-	4-（4-甲基-3-戊烯基）-3-环己烯-1-甲醛	Aldehyde	醛	-	-	37677-14-8	379465	585339	435229	58286.3	66593.3	53057.2	1.38956	0.0216556	0.214862	0.127095	-2.97602	down
KMW0554	GC-MS	C13H20O	.alpha.-Ionone	α-紫罗兰酮	Terpenoids	萜类	-	-	127-41-3	2.1976e+06	1.66178e+07	2.35767e+06	1.43659e+06	869411	628170	1.04077	0.33124	0.477114	0.13858	-2.85121	down
NMW0184	GC-MS	C13H20O	Ionone	紫罗兰酮	Terpenoids	萜类	-	-	8013-90-9	2.30673e+06	1.66977e+07	2.42038e+06	1.46622e+06	887157	641866	1.0493	0.32723	0.473209	0.139802	-2.83854	down
D388	GC-MS	C12H16O2	Butanoic acid, 1-phenylethyl ester	丁酸1-苯乙基酯	Ester	酯	-	-	3460-44-4	1.41776e+06	3.90633e+07	1.6691e+06	511691	351319	270612	1.05574	0.388421	0.525809	0.0268949	-5.21653	down
XMW0858	GC-MS	C11H13FN2	6-fluoro-.beta.-methyl-1H-Indole-3-ethanAmine	6-氟-β-甲基-1H-吲哚-3-乙胺	Amine	胺	-	-	77590-52-4	43235.3	16891.3	31222.6	118544	121820	230519	1.29481	0.0695933	0.233644	5.15476	2.36591	up
XMW0813	GC-MS	C12H17NO	Pentanal O-benzyloxime	邻苄基肟戊醛	Nitrogen compounds	含氮化合物	-	-	72399-21-4	382413	158608	311192	649443	572013	1.08786e+06	1.17935	0.0781456	0.243485	2.70979	1.43818	up
XMW0097	GC-MS	C14H22	1,5-Cycloundecadiene, 8,8-dimethyl-9-methylene-	8,8-二甲基-9-亚甲基-1,5-环癸二烯	Hydrocarbons	烃类	-	-	62338-54-9	2.4984e+07	9.65747e+06	1.28246e+07	4.41489e+07	5.5187e+07	2.74156e+07	1.16299	0.0611053	0.230553	2.67036	1.41703	up
NMW0281	GC-MS	C12H14O2	3-Butylisobenzofuran-1(3H)-one	3-丁基异苯并呋喃-1（3H）-酮	Heterocyclic compound	杂环化合物	-	-	6066-49-5	310429	89771.2	381466	74509.5	30636.1	34131.3	1.1836	0.131622	0.307783	0.17818	-2.48859	down
XMW0971	GC-MS	C12H14O2	Benzyl angelate	苯甲酸苄酯	Ester	酯	-	-	37526-87-7	4.25381e+07	1.49824e+07	1.5533e+07	5.75315e+07	5.02996e+07	5.55434e+07	1.13766	0.0732791	0.238358	2.23637	1.16116	up
XMW0940	GC-MS	C13H16O	Benzenemethanol, .alpha.-2-cyclohexen-1-yl-	α.-2-环己烯-1-基-苯甲醇	Alcohol	醇	-	-	5723-89-7	733988	419319	1.20225e+06	429642	253790	387288	1.0279	0.195618	0.357425	0.454551	-1.13748	down
XMW1244	GC-MS	C11H22O2	Hexanoic acid, pentyl ester	己酸戊酯	Ester	酯	-	-	540-07-8	19420.1	14506.6	17070.3	34221.5	22423.5	46462.8	1.16202	0.124094	0.301493	2.02184	1.01567	up
KMW0488	GC-MS	C13H28	Tridecane	十三烷	Hydrocarbons	烃类	-	-	629-50-5	16434.9	12263.7	20598.3	53556.9	39303.5	33032.3	1.277	0.0380348	0.225278	2.55376	1.35262	up
XMW1401	GC-MS	C11H20O2	n-Valeric acid cis-3-hexenyl ester	顺-3-己烯基酯-正戊酸	Ester	酯	-	-	35852-46-1	78360.7	27562.3	29960.7	134940	143265	138482	1.24228	0.0277343	0.220879	3.0665	1.61659	up
NMW0209	GC-MS	C11H20O2	Undecylenic Acid	十一碳烯酸	Acid	酸	-	-	112-38-9	835322	349578	499093	1.36991e+06	1.68694e+06	850113	1.12603	0.0731543	0.238358	2.32006	1.21416	up
WMW0106	GC-MS	C11H20O2	6-Nonen-1-ol, acetate, (Z)-	顺-6-壬烯基乙酸酯	Ester	酯	-	-	76238-22-7	178645	10308.9	111558	1.94092e+06	4.99648e+06	3.17486e+06	1.27155	0.0659571	0.230553	33.6501	5.07254	up
XMW1403	GC-MS	C11H20O2	cis-3-Hexenyl isovalerate	顺-3-异戊基异戊酸酯	Ester	酯	-	-	35154-45-1	79973.5	27562.3	30877.1	141158	144964	142291	1.24268	0.0289187	0.222536	3.09518	1.63002	up
D380	GC-MS	C11H18O2	3(2H)-Furanone, 2-hexyl-5-methyl-	2-己基-5-甲基-3（2H）-呋喃酮	Ketone	酮	-	-	33922-66-6	62081.9	21163.6	22265.2	79145.9	70438	81120.8	1.12042	0.0826598	0.248154	2.18655	1.12866	up
KMW0480	GC-MS	C11H18O2	trans-Geranic acid methyl ester	香叶酸甲酯	Ester	酯	-	-	1189-09-9	5235.55	5676.06	5934.12	9	3022.88	9	1.06185	0.0398442	0.225278	0.180514	-2.46982	down
KMW0449	GC-MS	C11H18O2	Bicyclo[2.2.1]heptan-2-ol, 1,7,7-trimethyl-, formate, endo-	甲酸冰片	Acid	酸	-	-	7492-41-3	115421	51587.6	94301	653177	471624	772388	1.35121	0.020852	0.211618	7.26031	2.86003	up
XMW1158	GC-MS	C10H15NO2	Tricyclo[3.3.1.1(3,7)]decane, 2-nitro-	2-硝基-三环[3.3.1.1（3,7）]癸烷	Nitrogen compounds	含氮化合物	-	-	54564-31-7	13220.1	6681.28	14984.3	79190.9	30743.7	98921.2	1.25012	0.101216	0.267858	5.98687	2.5818	up
NMW0215	GC-MS	C5H11NS3	N,N-Dimethyl-1,2,3-trithian-5-Amine	N，N-二甲基-1,2,3-三噻吩-5-胺	Amine	胺	-	-	31895-21-3	26835.9	15975.4	29739.1	11159.5	6018.32	5194.58	1.25804	0.0406906	0.225278	0.308369	-1.69727	down
XMW1129	GC-MS	C10H12O3	Ethyl mandelate	扁桃酸乙酯	Ester	酯	-	-	774-40-3	3.10972e+06	2.36777e+07	3.33711e+06	2.10546e+06	1.25753e+06	930198	1.03015	0.333867	0.479979	0.142515	-2.81082	down
KMW0511	GC-MS	C11H14O2	Butyl benzoate	苯甲酸丁酯	Ester	酯	-	-	136-60-7	1.3855e+06	3.8989e+07	1.63897e+06	487015	333887	270142	1.0575	0.38886	0.525809	0.0259689	-5.26707	down
XMW1343	GC-MS	C11H14O2	1-(3-Ethoxyphenyl)acetone	1-（3-乙氧基苯基）丙酮	Ketone	酮	-	-	23037-47-0	3467.52	14184	4694.29	1561.87	1208.83	1537.92	1.20356	0.217687	0.371397	0.192816	-2.3747	down
KMW0523	GC-MS	C11H24O	1-Undecanol	十一烷醇	Alcohol	醇	-	-	112-42-5	67346.6	1.77158e+06	77538.8	17417.7	10631.2	6080.4	1.12664	0.383337	0.523295	0.0178084	-5.8113	down
D273	GC-MS	C10H20O2	Butanoic acid, 2-methyl-, 2-methylbutyl ester	2-甲基丁酸2-甲基丁酯	Ester	酯	-	-	2445-78-5	68547.9	29666.3	20260.9	8471.42	9064.44	9758.68	1.22125	0.175957	0.350728	0.230382	-2.1179	down
NMW0037	GC-MS	C10H20O2	Butanoic acid, 3-methyl-, 3-methylbutyl ester	3-甲基-丁酸3-甲基丁酯	Ester	酯	-	-	659-70-1	67080.9	28077.5	19351.6	7212.44	8778.26	9120.16	1.22061	0.179172	0.351498	0.21929	-2.18909	down
XMW1226	GC-MS	C10H20O2	Hexanoic acid, 2-methylpropyl ester	2-甲基丙酯-己酸	Ester	酯	-	-	105-79-3	3989.9	1359.28	1372.02	7521.07	4670.46	5173.14	1.14488	0.0458493	0.225278	2.58357	1.36936	up
D305	GC-MS	C10H20O2	Butanoic acid, 2-methyl-, 3-methylbutyl ester	丁酸，2-甲基-，3-甲基丁酯	Ester	酯	-	-	27625-35-0	66896.7	29709.3	19221.2	6743.58	8607.44	7130.51	1.2467	0.164201	0.340021	0.194096	-2.36516	down
D313	GC-MS	C10H20O2	3-Hexene, 1-(1-ethoxyethoxy)-, (Z)-	（Z）-1-（1-乙氧基乙氧基）己-3-烯	Aldehyde	醛	-	-	28069-74-1	15555.3	7335.81	3905.84	1139.21	1743.96	2233.2	1.20028	0.17066	0.344814	0.190931	-2.38888	down
w06	GC-MS	C12H26	Heptane, 2,2,4,6,6-pentamethyl-	2,2,4,6,6-五甲基-庚烷	Hydrocarbons	烃类	-	-	13475-82-6	187556	185590	208298	483609	526736	462560	1.39159	0.00148305	0.118022	2.53319	1.34095	up
XMW0373	GC-MS	C12H26	Undecane, 2-methyl-	2-甲基-十一烷	Hydrocarbons	烃类	-	-	7045-71-8	39648.3	37927.8	36088.8	111016	109604	190972	1.34839	0.0659241	0.230553	3.6211	1.85643	up
KMW0297	GC-MS	C10H18O2	trans-Linalool oxide (furanoid)	（E）-芳樟醇氧化物	Heterocyclic compound	杂环化合物	-	-	34995-77-2	1.42705e+06	636894	416519	90612.5	83302.3	166101	1.27279	0.144576	0.317387	0.137077	-2.86694	down
NMW0162	GC-MS	C10H18O2	8-Methyl-6-nonenoic Acid	8-甲基-6-壬烯酸	Acid	酸	-	-	21382-25-2	64819	1.754e+06	72665	9	9	9	1.37	0.378358	0.519981	1.42745e-05	-16.0962	down
NMW0127	GC-MS	C10H18O2	6-Octenoic Acid, 3,7-dimethyl-	3,7-二甲基-6-辛烯酸	Acid	酸	-	-	502-47-6	668312	731299	514144	97711.1	113644	181899	1.35038	0.00822428	0.180987	0.205488	-2.28288	down
XMW0775	GC-MS	C12H24	1-Undecene, 9-methyl-	9-甲基-1-十一碳烯	Hydrocarbons	烃类	-	-	74630-41-4	64760.9	66228.6	81693.3	609743	389219	813296	1.36998	0.0486534	0.225278	8.52094	3.09101	up
NMW0149	GC-MS	C10H16O2	Geranic acid	香叶酸	Terpenoids	萜类	-	-	459-80-3	50629.7	35924.9	40573.9	250231	354650	239365	1.38428	0.0215913	0.214862	6.64089	2.73138	up
NMW0101	GC-MS	C10H16O2	Ascaridole	阿斯利多	Terpenoids	萜类	-	-	512-85-6	89049.3	45196.1	51831.7	10908.9	18921.1	28392.2	1.20465	0.0748816	0.240488	0.312893	-1.67626	down
XMW0246	GC-MS	C10H16O2	OxiranecarboxAldehyde, 3-methyl-3-(4-methyl-3-pentenyl)-	3-甲基-3-（4-甲基-3-戊烯基）-环氧乙烷甲醛	Aldehyde	醛	-	-	16996-12-6	14196.3	10107.5	18514.2	36668.2	24527.5	39909.5	1.23263	0.0345994	0.225278	2.36127	1.23956	up
XMW0907	GC-MS	C9H12O3	2-(2-Acetoxy-1-propyl)furan, (S)	（S）-2-（2-乙酰氧基-1-丙基）呋喃	Heterocyclic compound	杂环化合物	-	-	60830-70-8	76403.2	43128.6	141421	749794	508846	793101	1.32121	0.0142187	0.188646	7.86251	2.97499	up
NMW0151	GC-MS	C10H14O2	Bicyclo[3.1.1]hept-2-ene-2-carboxylic acid, 6,6-dimethyl-	6,6-二甲基-双环[3.1.1]庚-2-烯-2-羧酸	Terpenoids	萜类	-	-	19250-17-0	450871	235315	399028	155070	66519	87734.6	1.25848	0.042442	0.225278	0.285035	-1.81079	down
D113	GC-MS	C10H14O2	Benzene, (2,2-dimethoxyethyl)-	（2,2-二甲氧基乙基）-苯	Aromatics	芳烃	-	-	101-48-4	1679.96	1025.3	3465.62	9977.79	3886.7	12610.6	1.14839	0.11082	0.279173	4.29033	2.10109	up
NMW0211	GC-MS	C10H14O2	1-Cyclohexene-1-carboxylic acid, 4-(1-methylethenyl)-	4-（1-甲基乙烯基）-1-环己烯-1-羧酸	Terpenoids	萜类	-	-	7694-45-3	530560	164398	202352	845600	1.14088e+06	526279	1.12343	0.073961	0.239262	2.80032	1.48559	up
XMW0472	GC-MS	C9H10O3	1,2-Ethanediol, monobenzoate	1,2-乙二醇单苯甲酸酯	Ester	酯	-	-	94-33-7	1.07226e+07	4.56471e+07	1.13186e+07	9.83536e+06	3.67319e+06	3.07307e+06	1.0354	0.276235	0.429605	0.24497	-2.02932	down
KMW0601	GC-MS	C10H12O2	2-Butanone, 4-(4-hydroxyphenyl)-	覆盆子酮	Ketone	酮	-	-	5471-51-2	871750	1.91017e+06	954471	342256	177546	245560	1.30215	0.0941326	0.257993	0.20484	-2.28743	down
D143	GC-MS	C10H12O2	Benzenepropanoic acid, methyl ester	苯丙酸甲酯	Ester	酯	-	-	103-25-3	2517.95	1861.74	3802.68	7497.35	9480.33	16034.7	1.28059	0.0786149	0.243665	4.03458	2.01242	up
NMW0264	GC-MS	C9H8O3	2-Propenoic Acid, 3-(3-hydroxyphenyl)-	3-（3-羟苯基）-2-丙酸	Acid	酸	-	-	588-30-7	337749	115926	294312	799719	731015	1.31119e+06	1.23135	0.0487473	0.225278	3.79943	1.92578	up
XMW0794	GC-MS	C12H18	1,5-Cyclooctadiene, 3-(1-methyl-2-propenyl)-	3-（1-甲基-2-丙烯基）-1,5-环辛二烯	Hydrocarbons	烃类	-	-	16538-88-8	929927	421898	383150	90262.1	9	9	1.11044	0.0855979	0.252066	0.0520354	-4.26436	down
XMW0470	GC-MS	C10H14N2	1-ButanAmine, N-(2-pyridinylmethylene)-	N-（2-吡啶基亚甲基）-1-丁胺	Amine	胺	-	-	7032-24-8	1.27743e+07	5.50632e+07	1.35909e+07	1.17518e+07	4.34456e+06	3.65063e+06	1.03576	0.27702	0.429605	0.242508	-2.0439	down
D102	GC-MS	C11H14O	1-Pentanone, 1-phenyl-	1-苯基-1-戊酮	Ketone	酮	-	-	1009-14-9	1.37846e+06	3.90662e+07	1.67088e+06	477881	350972	270142	1.05772	0.388644	0.525809	0.0260948	-5.2601	down
XMW0805	GC-MS	C10H10S	Benzo[b]thiophene, 2-ethyl-	2-乙基-苯并[b]噻吩	Heterocyclic compound	杂环化合物	-	-	1196-81-2	2.25753e+06	1.01007e+07	2.41187e+06	1.91255e+06	764240	648078	1.05503	0.277211	0.429605	0.225108	-2.15131	down
KMW0416	GC-MS	C6H8OS2	Furan, 2-[(methyldithio)methyl]-	糠基甲基二含硫化合物	Sulfur compounds	含硫化合物	-	-	57500-00-2	132899	87260.6	180439	906475	437460	1.20785e+06	1.29624	0.0833379	0.248154	6.36994	2.67128	up
NMW0086	GC-MS	C11H13N	Pargyline	矮牵牛	Amine	胺	-	-	555-57-7	418791	317740	497202	1.27373e+06	471302	1.54281e+06	1.04635	0.164171	0.340021	2.66496	1.41411	up
XMW1310	GC-MS	C9H18O2	Isobutyl isovalerate	异戊酸异丁酯	Ester	酯	-	-	589-59-3	6351.65	7204.39	4526.02	26206.3	20177	14171.7	1.31482	0.0491365	0.225278	3.3489	1.74369	up
D269	GC-MS	C9H18O2	Butanoic acid, 2-methyl-, 2-methylpropyl ester	丁酸2-甲基-2-甲基丙酯	Ester	酯	-	-	2445-67-2	34713.4	34522.4	21099.2	170197	127878	90955.4	1.33266	0.0444431	0.225278	4.30652	2.10652	up
XMW1211	GC-MS	C9H18O2	2-Heptanol, acetate	1-甲基己基乙酸酯	Ester	酯	-	-	5921-82-4	8341.24	6203.89	4309.5	50441.8	38578.1	28847.3	1.35752	0.0304079	0.225018	6.25137	2.64417	up
D199	GC-MS	C8H14O3	Hexanoic acid, 3-oxo-, ethyl ester	己酸-3-氧代乙酯	Ester	酯	-	-	3249-68-1	126657	127661	90932	36714.1	27490.9	46314.1	1.32792	0.0119859	0.188646	0.320113	-1.64335	down
NMW0198	GC-MS	C12H12	Naphthalene, 1,2-dimethyl-	1,2,2-二甲基萘	Aromatics	芳烃	-	-	573-98-8	115237	253214	92543.2	57653.1	51167.3	65403.5	1.13488	0.196485	0.358185	0.377931	-1.40381	down
KMW0342	GC-MS	C10H18O	Citronellal	香茅醛	Terpenoids	萜类	-	-	106-23-0	314937	382199	307916	2.39965e+06	1.46852e+06	2.24525e+06	1.37885	0.0267795	0.220879	6.08269	2.60471	up
D409	GC-MS	C10H18O	(S)-2,5-Dimethyl-3-vinylhex-4-en-2-ol	（S）-2,5-二甲基-3-乙烯基己基-4-烯-2-醇	Alcohol	醇	-	-	35671-15-9	1.93397e+06	695837	993985	1.77632e+07	1.21145e+07	7.4216e+06	1.33236	0.062073	0.230553	10.2929	3.36358	up
D306	GC-MS	C10H18O	1,5-Heptadien-4-ol, 3,3,6-trimethyl-	3,3,6-三甲基-1,5-庚二烯-4-醇	Terpenoids	萜类	-	-	27644-04-8	159764	71483.7	48981.3	33357.9	24077.6	40619.7	1.07922	0.212427	0.368068	0.349911	-1.51494	down
KMW0362	GC-MS	C10H18O	Isoborneol	异樟脑	Terpenoids	萜类	-	-	124-76-5	84407.1	71980.5	92816.4	815084	489664	727762	1.38262	0.0253554	0.22075	8.15601	3.02786	up
KMW0337	GC-MS	C10H18O	4-Isopropyl-1-methylcyclohex-2-enol	对-2-薄荷-1-醇	Alcohol	醇	-	-	619-62-5	5703.61	11567.3	8169.65	1701.09	1360.97	1112.46	1.35802	0.0516607	0.225278	0.164089	-2.60745	down
XMW1131	GC-MS	C8H10O3	2,5-Furandione, 3-methyl-4-propyl-	3-甲基-4-丙基-2,5-呋喃二酮	Ketone	酮	-	-	16493-20-2	14120.8	5429.09	13270.5	176977	246532	167502	1.3678	0.0165153	0.195112	18.0074	4.17052	up
NMW0234	GC-MS	C7H6O4	Patulin	帕特林	Alcohol	醇	-	-	149-29-1	321164	643804	376919	69149.4	60869.3	54862.1	1.3683	0.0604071	0.230553	0.137777	-2.8596	down
XMW0663	GC-MS	C9H16N2	3,5-Dimethyl-1-butylpyrazole	3,5-二甲基-1-丁基吡唑	Heterocyclic compound	杂环化合物	-	-	2655-37-0	41298.5	29554.6	54220.7	133351	110980	198524	1.30451	0.048005	0.225278	3.54074	1.82405	up
XMW0681	GC-MS	C10H16O	6-Octenal, 7-methyl-3-methylene-	7-甲基-3-亚甲基-6-辛烯醛	Aldehyde	醛	-	-	55050-40-3	17219.1	13263.7	9299	33700.1	20073.4	49668.4	1.16456	0.122993	0.299804	2.60024	1.37864	up
XMW1137	GC-MS	C10H16O	Ethanone, 1-(1,3-dimethyl-3-cyclohexen-1-yl)-	1-（1,3-二甲基-3-环己烯-1-基）-乙酮	Terpenoids	萜类	-	-	51733-68-7	42417.3	18428.1	84727.5	385067	234462	516723	1.27068	0.0492668	0.225278	7.80538	2.96447	up
KMW0324	GC-MS	C10H16O	Limonene oxide, cis-	（Z）-柠檬烯氧化物	Terpenoids	萜类	-	-	13837-75-7	45528.1	13390.1	32442.9	246791	119261	208824	1.28105	0.0439851	0.225278	6.29234	2.6536	up
XMW0526	GC-MS	C10H16O	AcetAldehyde, (3,3-dimethylcyclohexylidene)-, (Z)-	（Z）-（3,3-二甲基环己叉基）-乙醛	Aldehyde	醛	-	-	26532-24-1	71704.4	29114.9	72566.7	412087	196202	560045	1.27442	0.0856484	0.252066	6.73834	2.75239	up
NMW0046	GC-MS	C10H16O	Bicyclo[3.1.1]heptan-3-ol, 6,6-dimethyl-2-methylene-, [1S-(1.alpha.,3.alpha.,5.alpha.)]-	[1S-（1α，3α，5α）]-6,6-二甲基-2-亚甲基-双环[3.1.1]庚-3-醇	Terpenoids	萜类	-	-	547-61-5	141289	91880.9	150439	360841	217628	458507	1.22548	0.0811532	0.247218	2.70321	1.43467	up
XMW0189	GC-MS	C10H16O	3-Cyclohexene-1-acetAldehyde, .alpha.,4-dimethyl-	α，4-二甲基-3-环己烯-1-乙醛	Aldehyde	醛	-	-	29548-14-9	40325.6	15073.6	43269.7	244481	133250	332432	1.2857	0.0682119	0.231775	7.19744	2.84748	up
XMW0166	GC-MS	C10H16O	3,7-Nonadien-2-one, 8-methyl-, (E)-	（E）-8-甲基-3,7-壬二烯-2-酮	Ketone	酮	-	-	35408-14-1	20633.4	17870.5	12996.8	43292.9	29360.8	63268.4	1.2354	0.097004	0.261484	2.63923	1.40012	up
KMW0181	GC-MS	C10H16O	2,3-Dehydro-1,8-cineole	2,3-脱氢-1,8-桉树脑	Terpenoids	萜类	-	-	92760-25-3	15348.1	5817.39	10141.8	562671	559558	339886	1.38349	0.022956	0.21559	46.702	5.54541	up
XMW0654	GC-MS	C10H16O	Ethanone, 1-(1,4-dimethyl-3-cyclohexen-1-yl)-	1-（1,4-二甲基-3-环己烯-1-基）-乙酮	Terpenoids	萜类	-	-	43219-68-7	61354.5	22776.5	45202.9	279135	120108	292276	1.26021	0.0718551	0.238102	5.34677	2.41867	up
KMW0310	GC-MS	C10H16O	2-Cyclohexen-1-ol, 1-methyl-4-(1-methylethenyl)-, trans-	（1R，4R）-1-甲基-4-丙-1-烯-2-基环己基-2-烯-1-醇	Alcohol	醇	-	-	7212-40-0	33431.1	61726.6	23688.3	122767	126587	93625.8	1.24849	0.00859054	0.180987	2.88592	1.52903	up
WMW0159	GC-MS	C10H16O	(+)-(1R,4R,5R)-2-(10)-PINEN-4-OL	（+）-顺式-邻苯二酚	Terpenoids	萜类	-	-	13040-03-4	136807	54752.3	133887	454356	267589	467601	1.24042	0.0323057	0.225107	3.65512	1.86992	up
KMW0290	GC-MS	C10H16O	Hotrienol	丁烯醇	Alcohol	醇	-	-	20053-88-7	8.80898e+06	4.38672e+06	2.691e+06	794457	1.09292e+06	980645	1.27095	0.14004	0.315412	0.18053	-2.46969	down
XMW0720	GC-MS	C10H16O	cis-p-Mentha-2,8-dien-1-ol	顺式-p-薄荷（2,8-二烯-1-醇）	Terpenoids	萜类	-	-	3886-78-0	1.40733e+06	981109	1.43732e+06	3.05603e+06	1.61264e+06	3.74805e+06	1.11531	0.128915	0.306348	2.20001	1.13751	up
QWM0003	GC-MS	C10H16O	2H-Pyran, 3,6-dihydro-4-methyl-2-(2-methyl-1-propenyl)-	3,6-二氢-4-甲基-2-（2-甲基-1-丙烯基）-2H-吡喃	Terpenoids	萜类	-	-	1786-08-9	38990.8	38964.3	38678.2	401285	236221	320338	1.38714	0.0276866	0.220879	8.21244	3.03781	up
XMW1133	GC-MS	C10H16O	5-Isopropyl-3,3-dimethyl-2-methylene-2,3-dihydrofuran	5-异丙基-3,3-二甲基-2-亚甲基-2,3-二氢呋喃	Heterocyclic compound	杂环化合物	-	-	81250-44-4	301729	287578	184499	1.77861e+06	1.28274e+06	822233	1.32906	0.0618014	0.230553	5.01881	2.32734	up
KMW0459	GC-MS	C10H16O	2,6-Octadienal, 3,7-dimethyl-, (E)-	（E）-3,7-二甲基-2,6-辛二烯醛	Terpenoids	萜类	-	-	141-27-5	340283	101867	97462.9	18210.4	30343.5	17851.4	1.26805	0.187854	0.354984	0.123061	-3.02256	down
D329	GC-MS	C10H16O	Myroxide	肉豆蔻	Terpenoids	萜类	-	-	28977-57-3	489484	293698	413225	1.00642e+06	494470	1.13928e+06	1.09693	0.124865	0.30182	2.20675	1.14192	up
XMW0764	GC-MS	C10H16O	(S)-(-)-(4-Isopropenyl-1-cyclohexenyl)methanol	（S）-（-）-（4-异丙烯基-1-环己烯基）甲醇	Terpenoids	萜类	-	-	18457-55-1	28793.2	34157.2	25406.3	9	9	9	1.4021	0.0074035	0.177684	0.000305579	-11.6762	down
XMW1386	GC-MS	C9H12O2	2-Acetyl-4,4-dimethyl-cyclopent-2-enone	2-乙酰基-4,4-二甲基-环戊-2-烯酮	Ketone	酮	-	-	81979-96-6	386210	349902	285756	962167	572348	771691	1.28917	0.0546567	0.229052	2.25685	1.17431	up
NMW0236	GC-MS	C8H8O3	Benzeneacetic Acid, 4-hydroxy-	4-羟基-苯乙酸	Acid	酸	-	-	156-38-7	869834	1.87589e+06	945853	344910	177546	234677	1.30349	0.0909373	0.255142	0.205098	-2.28562	down
NMW0197	GC-MS	C8H8O3	Benzoic Acid, 4-methoxy-	4-甲氧基苯甲酸	Aromatics	芳烃	-	-	100-09-4	1.04787e+07	3.41401e+06	3.33477e+06	1.51205e+07	1.30505e+07	1.46239e+07	1.15136	0.0609632	0.230553	2.4841	1.31272	up
D384	GC-MS	C4H8S3	TriSulfur compounds, methyl 2-propenyl	烯丙基三硫	Sulfur compounds	含硫化合物	-	-	34135-85-8	5813.3	3095.23	6203.99	12760.9	6231.82	11554.5	1.03889	0.107479	0.275843	2.02132	1.0153	up
XMW0738	GC-MS	C8H9NO2	Benzoic acid, 4-amino-, methyl ester	苯甲酸4-氨基甲酯	Ester	酯	-	-	619-45-4	413847	1.17948e+07	495761	146643	99491.7	77891.8	1.05917	0.38893	0.525809	0.0255049	-5.29308	down
XMW1139	GC-MS	C11H18	Naphthalene, 1,2,3,4,4a,5,6,7-octahydro-4a-methyl-	1,2,3,4,4a，5,6,7-八氢-4a-甲基-萘	Aromatics	芳烃	-	-	13943-77-6	53828.1	28511.7	96190.8	532774	393695	1.06334e+06	1.30965	0.0963876	0.26135	11.1455	3.47839	up
XMW0690	GC-MS	C11H18	Cyclohexene, 2,4-dimethyl-1-(1-methylethenyl)-	2,4-二甲基-1-（1-甲基乙烯基）-环己烯	Hydrocarbons	烃类	-	-	56763-60-1	1.00143e+07	5.05905e+06	3.1563e+06	1.39667e+06	1.23222e+06	1.7567e+06	1.2273	0.15179	0.32583	0.240574	-2.05545	down
XMW0925	GC-MS	C10H14O	Camphenone, 6-	6-甲苯酮	Ketone	酮	-	-	55659-42-2	1.0019e+07	5.06005e+06	3.16062e+06	1.39091e+06	1.23202e+06	1.7605e+06	1.22754	0.151609	0.32583	0.240324	-2.05695	down
XMW0968	GC-MS	C10H14O	4,7,7-Trimethylbicyclo[4.1.0]hept-3-en-2-one	4,7,7-三甲基双环[4.1.0] 庚-3-烯-2-酮	Ketone	酮	-	-	81800-50-2	721796	802994	536984	108388	134971	209310	1.33963	0.0122233	0.188646	0.219554	-2.18735	down
XMW0721	GC-MS	C10H14O	Benzene, 1-methoxy-4-propyl-	1-甲氧基-4-丙基-苯	Aromatics	芳烃	-	-	104-45-0	14421.6	10473.6	21995.7	101643	82472.9	141073	1.35031	0.0290384	0.222536	6.93501	2.7939	up
KMW0473	GC-MS	C10H14O	4-Isopropylcyclohexa-1,3-dienecarbAldehyde	1,3-p-薄荷脑-7-醛	Aldehyde	醛	-	-	1197-15-5	55168.9	40409.8	79274	127317	127414	294235	1.18984	0.149373	0.324149	3.13959	1.65058	up
NMW0006	GC-MS	C10H14O	2-Cyclohexen-1-one, 3-methyl-6-(1-methylethylidene)-	3-甲基-6-（1-甲基亚乙基）-2-环己烯-1-酮	Terpenoids	萜类	-	-	491-09-8	26527.2	18399.5	27985	69334.2	62071.6	97024.8	1.3313	0.0319977	0.225107	3.13297	1.64753	up
XMW0909	GC-MS	C10H14O	2,6,6-Trimethylbicyclo[3.2.0]hept-2-en-7-one	2,6,6-三甲基双环[3.2.0]庚-2-烯-7-酮	Terpenoids	萜类	-	-	4613-37-0	3.86775e+06	1.97934e+06	1.23006e+06	767424	611070	955524	1.13376	0.179692	0.351498	0.329796	-1.60035	down
KMW0418	GC-MS	C10H14O	(1R)-(-)-Myrtenal	S-肉豆蔻醛	Aldehyde	醛	-	-	18486-69-6	217951	113265	221245	600613	358844	683516	1.23283	0.0514541	0.225278	2.97392	1.57236	up
XMW1252	GC-MS	C10H14O	2(1H)-Naphthalenone, 3,4,5,6,7,8-hexahydro-	3,4,5,6,7,8-六氢-2（1H）-萘酮	Ketone	酮	-	-	13837-12-2	105757	113041	130966	29708.3	34167.4	43249.8	1.37336	0.00229264	0.128551	0.306279	-1.70708	down
NMW0153	GC-MS	C10H14O	Phenol, 4-butyl-	4-丁基-苯酚	Phenol	酚	-	-	1638-22-8	622561	324751	536251	259947	101709	146076	1.20258	0.0465476	0.225278	0.342238	-1.54693	down
NMW0128	GC-MS	C10H14O	Phenol, 4-(1-methylpropyl)-	4-（1-甲基）苯酚	Phenol	酚	-	-	99-71-8	231377	248136	167981	45467.6	53446.3	87199.1	1.31277	0.0111466	0.183694	0.287436	-1.79869	down
XMW1088	GC-MS	C9H10O2	4-Hydroxy-2-methylacetophenone	4-羟基-2-甲基苯乙酮	Ketone	酮	-	-	875-59-2	109344	56389.8	99876.7	38002.4	13353.7	20736	1.23673	0.0414972	0.225278	0.271421	-1.8814	down
XMW0535	GC-MS	C9H10O2	p-Tolylacetic Acid	对甲苯甲酸	Aromatics	芳烃	-	-	622-47-9	424770	220237	388068	149855	56178.8	73058.1	1.24459	0.040234	0.225278	0.270156	-1.88813	down
XMW0545	GC-MS	C10H15N	Benzenemethanamine, N-(1-methylethyl)-	N-（1-甲基乙基）-苯甲胺	Aromatics	芳烃	-	-	102-97-6	133952	66469.8	183574	973898	340691	1.28023e+06	1.22924	0.114649	0.285177	6.75743	2.75647	up
NMW0143	GC-MS	C10H15N	BenzenAmine, 2,6-diethyl-	2,6-二乙基苯甲胺	Amine	胺	-	-	579-66-8	52899.7	65642.7	77790.4	9	14342.8	9	1.11359	0.00357847	0.140188	0.0731452	-3.77309	down
NMW0156	GC-MS	C8H7NS	Benzene, (isothiocyanatomethyl)-	苯异硫氰酸酯	Heterocyclic compound	杂环化合物	-	-	622-78-6	489406	245079	413583	167981	91538.3	71102	1.24891	0.0481089	0.225278	0.287981	-1.79595	down
XMW0941	GC-MS	C11H16	exo-7-(trans-1-Propenyl)bicyclo[4.2.0]oct-1(2)-ene	7-[（1E）-1-丙烯基]双环[4.2.0]辛-1-烯	Hydrocarbons	烃类	-	-	107983-42-6	507668	318808	512454	1.38469e+06	756862	1.7187e+06	1.2187	0.0899177	0.253921	2.88308	1.52761	up
XMW0550	GC-MS	C7H8N4	N-Cyanomethyl-2-cyanimino-pyrrolidine	N-氰基甲基-2-氰基亚氨基吡咯烷	Heterocyclic compound	杂环化合物	-	-	134881-46-2	114426	77942.8	195113	73029.5	42584.3	65828.8	1.06632	0.179315	0.351498	0.468261	-1.09462	down
KMW0213	GC-MS	C6H12O2S	3-Mercapto-3-methylbutyl formate (ester)	巯基甲基丁酸酯	Sulfur compounds	含硫化合物	-	-	50746-10-6	4075.43	3830.98	8024.97	13136.3	12158.1	17021.3	1.24412	0.0121892	0.188646	2.65612	1.40932	up
NMW0070	GC-MS	C9H8O2	1,2-Propanedione, 1-phenyl-	1-苯基-1,2-丙二酮	Ketone	酮	-	-	579-07-7	52132.8	42749.1	89427.4	157974	147399	238035	1.25766	0.034508	0.225278	2.94835	1.55991	up
XMW0811	GC-MS	C9H9NO	Phenethyl isocyanate	异氰酸苯乙酯	Ester	酯	-	-	1943-82-4	130755	66469.8	183574	973898	354495	1.28213e+06	1.23844	0.110258	0.278152	6.85538	2.77724	up
D455	GC-MS	C7H14O3	Pentanoic acid, 2-hydroxy-4-methyl-, methyl ester	2-羟基-4-甲基-戊酸甲酯	Ester	酯	-	-	40348-72-9	1.23631e+06	547717	942879	3.98846e+07	3.96251e+07	2.60958e+07	1.38692	0.0170284	0.195112	38.7272	5.27527	up
XMW1220	GC-MS	C6H10O4	Ethyl hydrogen succinate	琥珀酸氢乙酯	Ester	酯	-	-	1070-34-4	3521.37	2280.7	3600.79	7859.06	4768.58	9573.79	1.19698	0.0828933	0.248154	2.36114	1.23948	up
KMW0560	GC-MS	C9H6O2	Coumarin	香豆素	Heterocyclic compound	杂环化合物	-	-	91-64-5	1.15147e+06	367647	401290	1.58233e+06	1.3594e+06	1.5349e+06	1.1338	0.0709782	0.236505	2.33108	1.221	up
GMW0113	GC-MS	C6H10S2	Diallyl disulphide	二烯丙基二硫化物	Sulfur compounds	含硫化合物	-	-	2179-57-9	13471.1	20611.1	18900.8	34999.4	43934.2	55834.3	1.30015	0.0339355	0.225278	2.5436	1.34687	up
WMW0109	GC-MS	C8H16O2	Propanoic acid, 2-methyl-, 2-methylpropyl ester	异丁酸异丁酯	Ester	酯	-	-	97-85-8	15743.3	18219	5074.92	30925.5	22124.6	34764	1.05104	0.0420214	0.225278	2.2495	1.1696	up
KMW0204	GC-MS	C8H16O2	Acetic acid, hexyl ester	乙酸己酯	Ester	酯	-	-	142-92-7	19002.8	24491.4	6134.74	70230.2	61230.7	50783.5	1.21245	0.00484223	0.154142	3.67214	1.87662	up
XMW0605	GC-MS	C10H22	Heptane, 3-ethyl-2-methyl-	3-乙基-2-甲基-庚烷	Hydrocarbons	烃类	-	-	14676-29-0	41076.1	12173	37754.8	230642	191435	99273.6	1.24286	0.0596362	0.230553	5.7289	2.51826	up
KMW0208	GC-MS	C10H22	Decane	癸烷	Hydrocarbons	烃类	-	-	124-18-5	35504.1	34497.4	22195.4	166020	128201	89679.1	1.3349	0.043308	0.225278	4.16392	2.05794	up
XMW1299	GC-MS	C10H22	Heptane, 3,3,5-trimethyl-	3,3,5-三甲基-庚烷	Hydrocarbons	烃类	-	-	7154-80-5	15743.3	18204.7	5122.37	28159.8	23912.9	34764	1.05973	0.0383121	0.225278	2.22257	1.15223	up
WMW0100	GC-MS	C9H18O	3-Nonen-1-ol, (E)-	（E）-3-壬-1-醇	Alcohol	醇	-	-	10339-61-4	82078.2	48817.5	77196.7	193805	108217	233315	1.19359	0.0885487	0.253241	2.57259	1.36322	up
XMW0410	GC-MS	C9H18O	1-Nonen-4-ol	1-壬四醇	Alcohol	醇	-	-	35192-73-5	210651	94261.9	67750.5	30378	37437.4	42853.3	1.17045	0.184105	0.352718	0.296967	-1.75163	down
WMW0028	GC-MS	C9H18O	4-Heptanone, 2,6-dimethyl-	2,6-二甲基-4-庚酮	Ketone	酮	-	-	108-83-8	5041.73	2067.01	1649.69	26438.3	46833.7	14660.6	1.30197	0.105028	0.272138	10.0398	3.32765	up
NMW0016	GC-MS	C8H14O2	Acetic acid, cyclohexyl ester	醋酸环己酯	Ester	酯	-	-	622-45-7	427693	170912	235614	3.7851e+06	2.58715e+06	1.62235e+06	1.33695	0.0602916	0.230553	9.58331	3.26052	up
D417	GC-MS	C8H14O2	3-Hexen-1-ol, acetate, (E)-	反式-3-己烯基乙酸酯	Ester	酯	-	-	3681-82-1	31351	25478.6	33032.3	80366.7	38039.3	105484	1.11852	0.149481	0.324149	2.49149	1.31701	up
D229	GC-MS	C8H14O2	Allyl isovalerate	异戊酸烯丙酯	Ester	酯	-	-	2835-39-4	18516.2	22870.6	5371.24	36536.2	28293.7	43613.2	1.03763	0.0417994	0.225278	2.31924	1.21365	up
XMW0638	GC-MS	C8H14O2	2,3'-Bifuran, octahydro-	八氢-2,3'-双呋喃	Heterocyclic compound	杂环化合物	-	-	73373-15-6	10687.2	10468.7	46975.7	118046	164793	248090	1.25798	0.0450559	0.225278	7.79269	2.96212	up
w07	GC-MS	C11H10	1H-Indene, 1-ethylidene-	1-亚乙基-1H-茚	Hydrocarbons	烃类	-	-	2471-83-2	8754.88	8152.6	10448.2	20891.3	14673.6	27040.9	1.26299	0.0762958	0.241723	2.28859	1.19446	up
XMW0162	GC-MS	C7H10O3	3-Penten-2-one, 4-(acetyloxy)-, (Z)-	（Z）-4-（乙酰氧基）-3-戊烯酮	Ketone	酮	-	-	38365-58-1	1526.24	889.178	717.682	3987.92	3068.67	1662.84	1.16664	0.0969364	0.261484	2.783	1.47664	up
NMW0097	GC-MS	C8H15NO	8-Azabicyclo[3.2.1]octan-3-ol, 8-methyl-, exo-	8-甲基-8-氮杂双环[3.2.1]-3-辛烷醇	Alcohol	醇	-	-	135-97-7	19027.5	11066.8	27616.1	50330	30713.4	60869.7	1.13055	0.0662189	0.230598	2.45906	1.29811	up
XMW0119	GC-MS	C9H16O	Cyclopentanone, 2-methyl-3-(1-methylethyl)-	2-甲基-3-（1-甲基乙基）-环戊酮	Ketone	酮	-	-	54549-81-4	13728.4	9077.94	11190.2	46572.4	30046.8	55582.9	1.33538	0.0445587	0.225278	3.88869	1.95928	up
XMW0486	GC-MS	C9H16O	Cyclohexanone, 2,2,6-trimethyl-	2,2,6-三甲基-环己酮	Ketone	酮	-	-	2408-37-9	426442	165695	229637	3.77525e+06	2.58057e+06	1.61462e+06	1.33566	0.0602838	0.230553	9.69906	3.27784	up
WMW0056	GC-MS	C9H16O	4-Nonenal, (E)-	（E）-4-壬醛	Aldehyde	醛	-	-	2277-16-9	98366	48219.6	48749.2	25837.5	34784.3	31745.1	1.12573	0.172224	0.347184	0.472865	-1.0805	down
KMW0078	GC-MS	C9H16O	8-Nonen-2-one	8-壬烯-2-酮	Ketone	酮	-	-	5009-32-5	47219.6	21000.7	12978.1	3597.77	5160.95	7529.2	1.2035	0.169993	0.344758	0.200594	-2.31765	down
KMW0531	GC-MS	C9H16O	3,6-Nonadien-1-ol, (E,Z)-	（E，Z）-3,6-壬二烯-1-醇	Alcohol	醇	-	-	56805-23-3	134028	128673	135676	1.53682e+06	803841	1.26352e+06	1.38034	0.037785	0.225278	9.04716	3.17747	up
XMW0528	GC-MS	C8H12S	Thiophene, 2-butyl-	2-丁基噻吩	Heterocyclic compound	杂环化合物	-	-	1455-20-5	16971.1	15485.4	19248.4	34915	40639.3	56230.2	1.32996	0.0488445	0.225278	2.54878	1.34981	up
D264	GC-MS	C10H18	1,6-Octadiene, 3,7-dimethyl-	3,7-二甲基辛基-1,6-二烯	Terpenoids	萜类	-	-	2436-90-0	573835	182784	594639	3.13325e+06	2.91251e+06	1.50571e+06	1.24869	0.0479209	0.225278	5.58847	2.48245	up
XMW0202	GC-MS	C10H18	cis-2,6-Dimethyl-2,6-octadiene	顺式-2,6-二甲基-2,6-辛二烯	Hydrocarbons	烃类	-	-	2492-22-0	58627.4	24744.6	512812	3.83545e+06	3.92323e+06	2.47289e+06	1.24059	0.0135256	0.188646	17.1618	4.10113	up
XMW0902	GC-MS	C10H18	2,6-Dimethyl-2-trans-6-octadiene	2,6-二甲基-2-反式-6-辛二烯	Terpenoids	萜类	-	-	2609-23-6	1.23631e+06	547382	942756	3.98846e+07	3.96251e+07	2.6101e+07	1.38691	0.0170136	0.195112	38.7356	5.27559	up
XMW0034	GC-MS	C8H14N2	2-Dimethylamino-4-methyl-pent-4-enenitrile	2-二甲基氨基-4-甲基-戊-4-烯腈	Others	其它类	-	-	94492-10-1	1094.11	2457.88	623.175	4429.69	2453.5	3708.96	1.09301	0.0552463	0.229052	2.53694	1.34309	up
XMW0900	GC-MS	C9H14O	3-Cyclohexen-1-one, 3,5,5-trimethyl-	3,5,5-三甲基-3-环己烯-1-酮	Ketone	酮	-	-	471-01-2	162407	73576.1	93659	1.39765e+06	930703	578917	1.33708	0.0666621	0.231097	8.81947	3.14069	up
NMW0061	GC-MS	C7H7NO2	1-methyl-2-nitro-Benzene	1-甲基-2-硝基苯	Aromatics	芳烃	-	-	88-72-2	2169.34	3206.2	6030.89	21268.3	12036.7	31825.3	1.26365	0.0831714	0.248154	5.70996	2.51348	up
KMW0199	GC-MS	C10H16	.beta.-Myrcene	月桂烯	Terpenoids	萜类	-	-	123-35-3	640327	298650	508862	1.83944e+07	1.82431e+07	1.23664e+07	1.38749	0.0151304	0.188668	33.8462	5.08092	up
XMW0004	GC-MS	C10H16	Bicyclo[3.1.1]heptane, 6,6-dimethyl-2-methylene-, (1S)-	（1S）-6,6-二甲基-2-亚甲基-双环[3.1.1]庚烷	Terpenoids	萜类	-	-	18172-67-3	2.04381e+07	6.27976e+06	1.99274e+07	1.07357e+08	1.03004e+08	5.16165e+07	1.24761	0.0492006	0.225278	5.61639	2.48964	up
XMW0437	GC-MS	C10H16	1,5-Cyclooctadiene, 1,6-dimethyl-	1,6-二甲基-1,5-环辛二烯	Hydrocarbons	烃类	-	-	3760-13-2	297872	131985	88413.5	28076.4	32557.2	40246.4	1.24784	0.160623	0.336222	0.194648	-2.36106	down
KMW0172	GC-MS	C10H16	Camphene	莰烯	Terpenoids	萜类	-	-	79-92-5	281020	63044.3	178174	8.46686e+06	1.67089e+07	3.51454e+06	1.33665	0.134783	0.309382	54.9373	5.77971	up
KMW0220	GC-MS	C10H16	3-Carene	δ-3-蒈烯	Terpenoids	萜类	-	-	13466-78-9	4.98676e+07	4.84686e+07	3.12454e+07	2.22088e+08	1.74375e+08	1.24158e+08	1.33651	0.0389649	0.225278	4.01771	2.00637	up
XMW0678	GC-MS	C10H16	1,3-Cyclohexadiene, 1,5,5,6-tetramethyl-	1,5,5,6-四甲基-1,3-环己二烯	Terpenoids	萜类	-	-	514-94-3	63977.7	27513.3	674049	5.4884e+06	4.05983e+06	3.35326e+06	1.23061	0.0156029	0.191108	16.8528	4.07492	up
WMW0023	GC-MS	C10H16	(+)-alpha-Pinene	（+）-α-P烯	Terpenoids	萜类	-	-	7785-70-8	58995.2	26299.1	22613.5	788789	851309	308507	1.34441	0.0693526	0.233277	18.058	4.17457	up
KMW0217	GC-MS	C10H16	D-Limonene	（+）-柠檬烯	Terpenoids	萜类	-	-	5989-27-5	8110.98	8353.91	5175.29	149963	95321.8	178144	1.38714	0.0312173	0.225107	19.5668	4.29033	up
KMW0148	GC-MS	C10H16	.alpha.-Pinene	α-蒎烯	Terpenoids	萜类	-	-	80-56-8	157543	68561.8	375219	9.36216e+06	8.65344e+06	4.31035e+06	1.34164	0.0439936	0.225278	37.128	5.21443	up
KMW0178	GC-MS	C10H16	Bicyclo[3.1.0]hexane, 4-methylene-1-(1-methylethyl)-	沙宾烯	Terpenoids	萜类	-	-	3387-41-5	9	3679.34	2010.88	9	9	9	1.0021	0.216687	0.370936	0.00473749	-7.72166	down
KMW0198	GC-MS	C10H16	.alpha.-Phellandrene 1	（+）-α-芹烯1	Terpenoids	萜类	-	-	99-83-2	4.98348e+07	4.84516e+07	3.12297e+07	2.22045e+08	1.74345e+08	1.24133e+08	1.33654	0.0389602	0.225278	4.01899	2.00683	up
XMW0416	GC-MS	C10H16	1,3-Cyclohexadiene, 5-butyl-	5-丁基-1,3-环己二烯	Hydrocarbons	烃类	-	-	30168-57-1	6.8654e+06	2.40649e+06	3.15201e+06	5.65363e+07	3.92181e+07	2.416e+07	1.3277	0.0590238	0.230553	9.65191	3.27081	up
KMW0223	GC-MS	C10H16	1,3-Cyclohexadiene, 1-methyl-4-(1-methylethyl)-	α-萜类品烯	Terpenoids	萜类	-	-	99-86-5	3.08403e+06	2.9881e+06	1.90511e+06	1.81967e+07	1.32124e+07	8.49901e+06	1.33036	0.0603178	0.230553	5.00275	2.32272	up
XMW0084	GC-MS	C10H16	2,4,6-Octatriene, 2,6-dimethyl-	2,6-二甲基-2,4,6-辛三烯	Terpenoids	萜类	-	-	673-84-7	115698	47781.7	121361	363206	222091	392614	1.22736	0.0322413	0.225107	3.43319	1.77955	up
XMW0521	GC-MS	C10H16	1,7-Octadiene, 2-methyl-6-methylene-	2-甲基-6-亚甲基-1,7-辛二烯	Terpenoids	萜类	-	-	1686-30-2	11564.5	6817.77	62226.3	483044	485890	300371	1.27925	0.0169993	0.195112	15.7465	3.97696	up
XMW0709	GC-MS	C10H16	Cyclohexane, 1-methylene-4-(1-methylethenyl)-	1-亚甲基-4-（1-甲基乙烯基）-环己烷	Terpenoids	萜类	-	-	499-97-8	4.98321e+07	4.84486e+07	3.12297e+07	2.22047e+08	1.74347e+08	1.24133e+08	1.33655	0.0389614	0.225278	4.01919	2.0069	up
XMW0023	GC-MS	C10H16	4-methyl-1-(1-methylethyl)-Bicyclo[3.1.0]hex-2-ene	4-甲基-1-（1-甲基乙基）-双环[3.1.0]己-2-烯	Hydrocarbons	烃类	-	-	28634-89-1	297319	64001.6	181333	8.5701e+06	1.67979e+07	3.56957e+06	1.33516	0.133502	0.308322	53.326	5.73677	up
KMW0235	GC-MS	C10H16	1,3,6-Octatriene, 3,7-dimethyl-, (Z)-	（Z）-BETA-辛二烯	Terpenoids	萜类	-	-	3338-55-4	2.22191e+07	8.17848e+06	9.55254e+06	1.5354e+08	1.10647e+08	6.93186e+07	1.3241	0.0523333	0.225278	8.34807	3.06144	up
D316	GC-MS	C10H16	Adamantane	金刚烷	Hydrocarbons	烃类	-	-	281-23-2	1.29045e+06	629455	432617	154179	160830	221568	1.24783	0.143913	0.317387	0.228085	-2.13235	down
XMW0452	GC-MS	C10H16	2,4,6-Octatriene, 3,4-dimethyl-	3,4-二甲基-2,4,6-辛三烯	Hydrocarbons	烃类	-	-	57396-75-5	3.3935e+06	1.65428e+06	1.03013e+06	212311	245888	314310	1.30493	0.129274	0.306348	0.127101	-2.97595	down
XMW0632	GC-MS	C10H16	Bicyclo[3.1.1]hept-2-ene, 3,6,6-trimethyl-	3,6,6-三甲基-双环[3.1.1]庚-2-烯	Terpenoids	萜类	-	-	4889-83-2	2.04354e+07	6.28137e+06	1.99296e+07	1.07199e+08	1.02813e+08	5.16062e+07	1.24762	0.0490289	0.225278	5.60854	2.48763	up
WMW0215	GC-MS	C10H16	.beta.-Ocimene	β-奥西米尼	Terpenoids	萜类	-	-	13877-91-3	2.21891e+07	8.16321e+06	9.53556e+06	1.53505e+08	1.10623e+08	6.93037e+07	1.32415	0.0523191	0.225278	8.35921	3.06337	up
WMW0201	GC-MS	C10H16	Bicyclo[2.2.1]heptane, 7,7-dimethyl-2-methylene-	7,7-二甲基-2-亚甲基-双环[2.2.1]庚烷	Terpenoids	萜类	-	-	471-84-1	2.04432e+07	6.28067e+06	1.98888e+07	1.06822e+08	1.02454e+08	5.14155e+07	1.2473	0.0490827	0.225278	5.59273	2.48355	up
XMW1064	GC-MS	C8H12N2	1,4-Methano-1H-Cyclopropa[d]pyridazine, 4,4a,5,5a-tetrahydro-6,6-dimethyl-, (1.alpha.,4.alpha.,4a.alpha.,5a.alpha.)-	（1α，4α，4aα，5a.α 。）-4,4a，5,5a-四氢-6,6-二甲基-1,4-甲基-1H-环丙[d]哒嗪	Heterocyclic compound	杂环化合物	-	-	109746-10-3	93359.7	40595.4	109098	599553	207689	798921	1.22121	0.118308	0.291801	6.60829	2.72428	up
D414	GC-MS	C9H12O	Bicyclo[3.1.0]hex-3-en-2-one, 5-(1-methylethyl)-	脱氢沙棘酮	Ketone	酮	-	-	36262-12-1	9.98775e+06	5.03901e+06	3.1318e+06	1.34384e+06	1.16598e+06	1.66966e+06	1.23506	0.149428	0.324149	0.230166	-2.11925	down
WMW0081	GC-MS	C9H12O	cis-2-(2-Pentenyl)furan	顺-2-（2-戊烯基）呋喃	Heterocyclic compound	杂环化合物	-	-	70424-13-4	1.77115e+06	1.71465e+06	1.12881e+06	1.01077e+07	7.42552e+06	4.79761e+06	1.33214	0.0588692	0.230553	4.83916	2.27476	up
XMW0603	GC-MS	C9H12O	Benzene, 1-ethyl-4-methoxy-	1-乙基-4-甲氧基-苯	Aromatics	芳烃	-	-	1515-95-3	3.39621e+06	1.656e+06	1.04587e+06	257207	287561	373220	1.29134	0.133395	0.308322	0.150537	-2.73181	down
XMW0019	GC-MS	C8H8O2	Acetophenone, 4'-hydroxy-	4'-羟基-苯乙酮	Ketone	酮	-	-	99-93-4	2.1052e+07	6.99939e+06	7.37656e+06	2.9528e+07	2.5696e+07	2.86148e+07	1.14695	0.0654704	0.230553	2.36646	1.24273	up
XMW1318	GC-MS	C8H8O2	2-Methyl-3(2-furyl)acrolein	2-甲基-3（2-呋喃基）丙烯醛	Heterocyclic compound	杂环化合物	-	-	874-66-8	1.29193e+06	631292	434408	163017	153843	221568	1.24877	0.143425	0.317214	0.228377	-2.13051	down
NMW0157	GC-MS	C8H9NO	Acetamide, N-phenyl-	N-苯基-乙酰胺	Amine	胺	-	-	103-84-4	828627	434318	690759	317598	132696	183120	1.23052	0.0442719	0.225278	0.324212	-1.62499	down
NMW0176	GC-MS	C8H9NO	Benzeneacetamide	苯乙酰胺	Amine	胺	-	-	103-81-1	3.56683e+06	1.5132e+07	3.75949e+06	3.3063e+06	1.31387e+06	1.06755e+06	1.02653	0.279545	0.43134	0.253257	-1.98133	down
XMW0206	GC-MS	C5H5N5	1H-Pyrazolo[3,4-d]pyrimidin-4-amine	1H-吡唑并[3,4-d]嘧啶-4-胺	Heterocyclic compound	杂环化合物	-	-	2380-63-4	433016	257102	701738	272382	151103	240807	1.00829	0.195251	0.357122	0.477271	-1.06712	down
XMW0366	GC-MS	C10H14	Benzene, 1,2,3,5-tetramethyl-	1,2,3,5-四甲基苯	Aromatics	芳烃	-	-	527-53-7	403291	321081	262199	1.57522e+06	872128	1.87562e+06	1.32242	0.0620927	0.230553	4.38182	2.13153	up
NMW0794	GC-MS	C10H14	Benzene, (1-methylpropyl)-	（1-甲基丙基）-苯	Aromatics	芳烃	-	-	135-98-8	1.14918e+06	1.12554e+06	730607	6.52242e+06	4.76854e+06	3.08359e+06	1.32998	0.059791	0.230553	4.78303	2.25792	up
KMW0273	GC-MS	C10H14	Benzene, 1,2,4,5-tetramethyl-	杜罗尔	Aromatics	芳烃	-	-	95-93-2	407288	322184	263927	1.57531e+06	864236	1.87589e+06	1.31956	0.0635726	0.230553	4.34411	2.11906	up
KMW0431	GC-MS	C8H10N2	5H-5-Methyl-6,7-dihydrocyclopentapyrazine	二氢甲基环戊哌嗪	Heterocyclic compound	杂环化合物	-	-	23747-48-0	1.75455e+06	1.27981e+06	1.8822e+06	3.81777e+06	2.07232e+06	4.96132e+06	1.1118	0.137016	0.311974	2.20712	1.14216	up
XMW1378	GC-MS	C9H10O	4,6-Octadiyn-3-one, 2-methyl-	2-甲基-4,6-辛二炔-3-酮	Ketone	酮	-	-	29743-33-7	30252.4	20142.3	30570.7	51966.8	64530.8	90645	1.2771	0.0559681	0.230553	2.55841	1.35525	up
XMW0826	GC-MS	C7H6N2O	3-Methylisoxazolo[4,5-b]pyridine	3-甲基异唑并[4,5-b]吡啶	Heterocyclic compound	杂环化合物	-	-	83988-39-0	223840	127654	304068	594037	402956	757333	1.18692	0.0508123	0.225278	2.67606	1.42011	up
XMW0098	GC-MS	C8H6O2	1,4-BenzenedicarboxAldehyde	1,4-苯二甲醛	Aldehyde	醛	-	-	623-27-8	9	9	6489.12	28038.3	39337.9	84976.6	1.1352	0.10566	0.272354	23.4132	4.54925	up
XMW0901	GC-MS	C5H7ClO2	3-Chloro-2,4-pentanedione	3-氯-2,4-戊二酮	Halogenated hydrocarbons	卤代烃	-	-	1694-29-7	994.461	437.952	1292.23	22072.8	17095.8	10195.7	1.35037	0.0450606	0.225278	18.1177	4.17933	up
XMW0657	GC-MS	C8H7NO	Benzoxazole, 2-methyl-	2-甲基-苯并恶唑	Heterocyclic compound	杂环化合物	-	-	95-21-6	75700.2	56435	82163.6	166478	91136.4	217461	1.11854	0.13599	0.310435	2.21688	1.14853	up
NMW0010	GC-MS	C10H12	Dicyclopentadiene	双环戊二烯	Terpenoids	萜类	-	-	77-73-6	610184	595322	379945	3.26435e+06	2.40979e+06	1.57691e+06	1.32734	0.0575052	0.230553	4.57349	2.1933	up
KMW0219	GC-MS	C8H18O	1-Hexanol, 2-ethyl-	2-乙基己醇	Alcohol	醇	-	-	104-76-7	1394.27	1156.51	3625.54	8440.74	10599.1	14679.1	1.28114	0.0237926	0.21559	5.4594	2.44874	up
KMW0202	GC-MS	C8H18O	3-Octanol	3-辛醇	Alcohol	醇	-	-	589-98-0	5766.97	3416.3	5152.75	155858	158141	104748	1.39154	0.0161856	0.194227	29.2094	4.86836	up
KMW0194	GC-MS	C8H18O	2-Octanol	2-辛醇	Alcohol	醇	-	-	123-96-6	6805.45	6258.03	4332.49	24330	19040	13877	1.32295	0.0411088	0.225278	3.29082	1.71845	up
KMW0137	GC-MS	C9H20	Nonane	壬烷	Hydrocarbons	烃类	-	-	111-84-2	18203.5	21682.3	5255.59	36579.2	27260.6	43092.8	1.04769	0.038979	0.225278	2.36884	1.24418	up
WMW0058	GC-MS	C8H16O	5-Hepten-2-ol, 6-methyl-	6-甲基-5-庚-2-醇	Alcohol	醇	-	-	1569-60-4	191086	106218	144881	5.27469e+06	5.25509e+06	3.34949e+06	1.3908	0.0195961	0.206707	31.3879	4.97214	up
XMW0578	GC-MS	C8H16O	Furan, 2-butyltetrahydro-	2-丁基四氢-呋喃	Heterocyclic compound	杂环化合物	-	-	1004-29-1	37802	37511.1	22160.3	153442	113553	82556.3	1.3091	0.0474836	0.225278	3.58612	1.84242	up
KMW0187	GC-MS	C8H16O	2-Octanone	2-辛酮	Ketone	酮	-	-	111-13-7	20246	19623.1	12911.6	104407	74489.6	50919.2	1.32677	0.0593792	0.230553	4.35417	2.1224	up
w01	GC-MS	C8H16O	Cyclooctyl Alcohol	环辛醇	Alcohol	醇	-	-	696-71-9	6137.95	4687.78	7837.49	43483	24007.4	42518.4	1.3484	0.038315	0.225278	5.89442	2.55935	up
NMW0782	GC-MS	C7H12O2	2-Butenoic acid, 2-methyl-, ethyl ester	2-甲基2-丁酸乙酯	Ester	酯	-	-	55514-48-2	4492.44	7592.57	20582.7	64299.6	53254.9	28513.2	1.17811	0.0520357	0.225278	4.47132	2.1607	up
NMW0230	GC-MS	C5H8N2O2	5,6-Dihydro-5-methyluracil	5,6-二氢-5-甲基尿嘧啶	Heterocyclic compound	杂环化合物	-	-	696-04-8	167151	108050	145516	97189.2	42196.3	57177.9	1.16028	0.0350854	0.225278	0.467212	-1.09785	down
KMW0207	GC-MS	C6H8OS	2-Furanmethanethiol, 5-methyl-	甲基糠基硫醇	Heterocyclic compound	杂环化合物	-	-	59303-05-8	191320	107798	146957	5.27758e+06	5.2604e+06	3.34949e+06	1.39096	0.0196698	0.206707	31.1325	4.96035	up
KMW0184	GC-MS	C6H9NS	Thiazole, 2,4,5-trimethyl-	三甲基噻唑	Heterocyclic compound	杂环化合物	-	-	13623-11-5	626.143	993.54	1214.64	1689.1	1575.51	2480.5	1.15736	0.0550776	0.229052	2.02698	1.01933	up
w41	GC-MS	C8H14O	3-Octen-2-one, (E)-	（E）-3-辛烯酮	Ketone	酮	-	-	18402-82-9	2075.03	484.447	3996	414717	262560	474951	1.36167	0.0262837	0.220879	175.766	7.45751	up
KMW0230	GC-MS	C8H14O	3-Octen-2-one	3-辛烯-2-酮	Ketone	酮	-	-	1669-44-9	454264	163188	229660	3.68631e+06	2.6333e+06	1.73511e+06	1.33613	0.0478879	0.225278	9.50845	3.24921	up
XMW0028	GC-MS	C8H15N	Pyridine, 2,3,4,5-tetrahydro-6-propyl-	2,3,4,5-四氢-6-丙基-吡啶	Heterocyclic compound	杂环化合物	-	-	1604-01-9	9	9	9	8462.12	6785.61	10150.6	1.40207	0.0129373	0.188646	940.678	9.87756	up
XMW1124	GC-MS	C7H11NO	2-Azabicyclo[3.2.1]octan-3-one	2-氮杂双环[3.2.1] 辛烷-3-酮	Ketone	酮	-	-	26396-67-8	3434.98	9	2880.15	134432	83522.6	151736	1.14501	0.0271285	0.220879	58.4572	5.86931	up
WMW0099	GC-MS	C9H16	Cyclopentene, 1-butyl-	1-丁基-环戊烯	Hydrocarbons	烃类	-	-	2423-01-0	1.06079e+06	333556	1.04112e+06	5.69931e+06	5.41756e+06	2.68246e+06	1.24937	0.0515937	0.225278	5.666	2.50233	up
WMW0126	GC-MS	C9H16	1,3-Hexadiene, 3-ethyl-2-methyl-	3-乙基-2-甲基-1,3-己二烯	Hydrocarbons	烃类	-	-	61142-36-7	8495.25	8071.74	16836.5	923370	573974	1.0163e+06	1.38733	0.0254719	0.22075	75.2509	6.23364	up
XMW0289	GC-MS	C7H8O2	2-Acetyl-5-methylfuran	2-乙酰基-5-甲基呋喃	Heterocyclic compound	杂环化合物	-	-	1193-79-9	308999	190868	224121	1.48389e+06	1.05264e+06	843320	1.35005	0.0385736	0.225278	4.66838	2.22292	up
D210	GC-MS	C6H5NO2	Benzene, nitro-	硝基苯	Aromatics	芳烃	-	-	98-95-3	19384.1	18238.2	31019.5	41851	51794.2	83915.8	1.21572	0.092037	0.255855	2.58678	1.37115	up
XMW1229	GC-MS	C9H14	Bicyclo(3.3.1)non-2-ene	双环（3.3.1）非-2-烯	Hydrocarbons	烃类	-	-	6671-66-5	27046.3	6411.37	18883.6	745327	1.4675e+06	319886	1.3351	0.132278	0.307783	48.3885	5.59659	up
KMW0183	GC-MS	C7H10N2	Pyrazine, 2-ethyl-5-methyl-	乙基甲基吡嗪	Heterocyclic compound	杂环化合物	-	-	13360-64-0	3.08201e+06	2.98638e+06	1.90448e+06	1.81944e+07	1.32098e+07	8.49801e+06	1.33042	0.0603132	0.230553	5.00475	2.3233	up
KMW0190	GC-MS	C7H10N2	Pyrazine, trimethyl-	三甲基吡嗪	Heterocyclic compound	杂环化合物	-	-	14667-55-1	518257	514639	336989	2.35381e+06	1.83389e+06	1.28359e+06	1.33522	0.0430879	0.225278	3.99397	1.99782	up
KMW0192	GC-MS	C8H10O	Benzene, 1-methoxy-2-methyl-	2-甲基苯甲醚	Aromatics	芳烃	-	-	578-58-5	321742	310865	209050	1.90483e+06	1.37419e+06	884078	1.33252	0.0621212	0.230553	4.94631	2.30635	up
KMW0703	GC-MS	C8H10O	Phenol, 4-ethyl-	对氢乙苯	Aromatics	芳烃	-	-	123-07-9	48414.9	26006.8	54724.3	150030	84570.3	166017	1.22722	0.0553285	0.229052	3.10205	1.63322	up
KMW0214	GC-MS	C6H6N2O	Acetylpyrazine	乙酰吡嗪	Heterocyclic compound	杂环化合物	-	-	22047-25-2	426.732	549.224	1624.49	3748.14	2747.23	1893.08	1.1367	0.0483969	0.225278	3.22577	1.68964	up
WMW0085	GC-MS	C4H10S2	Diethyl diSulfur compounds	二乙基二硫	Sulfur compounds	含硫化合物	-	-	110-81-6	3199.91	1633.37	2423.88	25390.2	27622	12648.4	1.34707	0.0516574	0.225278	9.04771	3.17755	up
XMW0522	GC-MS	C8H11N	Pyridine, 3-propyl-	3-丙基吡啶	Heterocyclic compound	杂环化合物	-	-	4673-31-8	134064	51169.6	1.1779e+06	9.64633e+06	9.88529e+06	5.90594e+06	1.2406	0.0186765	0.20602	18.661	4.22196	up
XMW1385	GC-MS	C6H7N3	3-Imidazol-1-ylpropanenitrile	3-咪唑-1-基丙腈	Heterocyclic compound	杂环化合物	-	-	23996-53-4	236545	212806	271586	2.2354e+06	1.22258e+06	2.15604e+06	1.37242	0.0372055	0.225278	7.78712	2.96109	up
XMW0711	GC-MS	C7H7NO	Formamide, N-phenyl-	N-苯基-甲酰胺	Aromatics	芳烃	-	-	103-70-8	21154.1	9874.95	21792.8	122011	41991.1	152032	1.22561	0.114244	0.284569	5.98303	2.58088	up
NMW0789	GC-MS	C9H12	Benzene, 1-ethyl-3-methyl-	1-乙基-3-甲基-苯	Aromatics	芳烃	-	-	620-14-4	22547.3	4623.16	14770.7	688769	1.40246e+06	281116	1.33139	0.141185	0.316197	56.5636	5.8218	up
NMW0012	GC-MS	C9H12	Benzene, 1,2,3-trimethyl-	1,2,3-三甲基苯	Aromatics	芳烃	-	-	526-73-8	34558.3	21087.7	32112.2	125746	124214	174892	1.36448	0.0166276	0.195112	4.84117	2.27536	up
KMW0150	GC-MS	C9H12	Benzene, 1,2,4-trimethyl-	甲基对二甲苯	Aromatics	芳烃	-	-	95-63-6	228915	96046.9	173377	8.55001e+06	8.44282e+06	5.19878e+06	1.38507	0.0222413	0.21559	44.5312	5.47675	up
XMW0015	GC-MS	C8H8O	BenzAldehyde, 4-methyl-	4-甲基-苯甲醛	Aldehyde	醛	-	-	104-87-0	18686.2	18842.3	41387	48897.1	58993.2	94316.5	1.15523	0.0764911	0.241723	2.56232	1.35745	up
NMW0777	GC-MS	C4H8S2	DiSulfur compounds, methyl 2-propenyl	二硫化二甲基2-丙烯基	Sulfur compounds	含硫化合物	-	-	2179-58-0	13723	10874.9	13229.5	21106.7	28555.6	29790.5	1.32417	0.0268979	0.220879	2.1004	1.07066	up
NMW0774	GC-MS	C6H14O2	Ethanol, 2-butoxy-	2-丁氧基乙醇	Alcohol	醇	-	-	111-76-2	18690.2	22271.6	5800.05	37532.8	28891	43396.5	1.06582	0.033803	0.225278	2.3485	1.23174	up
XMW0770	GC-MS	C9H10	Indane	茚满	Aromatics	芳烃	-	-	496-11-7	19033	18400.7	34410.9	46212	40372.7	59119.5	1.17721	0.0321015	0.225107	2.02805	1.02009	up
NMW0011	GC-MS	C8H6O	Benzofuran	苯并呋喃	Heterocyclic compound	杂环化合物	-	-	271-89-6	35939.3	35562	22887.3	206075	151776	97751.5	1.33089	0.0588155	0.230553	4.82688	2.27109	up
KMW0128	GC-MS	C6H12O2	Hexanoic Acid	己酸	Acid	酸	-	-	142-62-1	39485	24680.5	42617.2	88795.6	66661.8	95183.5	1.26807	0.0139019	0.188646	2.3472	1.23094	up
KMW0167	GC-MS	C5H8OS	3(2H)-Thiophenone, dihydro-2-methyl-	甲基二氢噻吩酮	Heterocyclic compound	杂环化合物	-	-	13679-85-1	4287.32	4827.34	3302.88	19835.9	17187	11915.4	1.35351	0.030889	0.225107	3.94106	1.97858	up
XMW0291	GC-MS	C5H9NO2	N-Acetylisoxazolidine	N-乙酰乙二唑烷	Heterocyclic compound	杂环化合物	-	-	115615-36-6	1632.95	1205.67	4509.58	94284.6	86396.1	43359.5	1.34967	0.0442629	0.225278	30.4891	4.93022	up
KMW0152	GC-MS	C5H9NS	Butane, 1-isothiocyanato-	异硫氰酸丁酯	Ester	酯	-	-	592-82-5	1619.74	9	818.205	52217.8	102318	21741	1.18464	0.132402	0.307783	72.0393	6.17071	up
KMW0079	GC-MS	C8H18	Octane	辛烷	Hydrocarbons	烃类	-	-	111-65-9	32067.2	41618.9	9678.35	131683	61450	219546	1.15605	0.133172	0.308322	4.9503	2.30752	up
WMW0103	GC-MS	C7H14O	2-Cyclopentylethanol	2-环戊基乙醇	Alcohol	醇	-	-	766-00-7	4.15457e+06	4.00264e+06	2.57948e+06	2.04943e+07	1.55284e+07	1.05664e+07	1.33195	0.0491966	0.225278	4.33924	2.11744	up
XMW0279	GC-MS	C7H14O	E-1-Methoxy-4-hexene	E-1-甲氧基-4-己烯	Hydrocarbons	烃类	-	-	134777-60-9	53347.8	59403.2	13825.4	186696	83768.8	324837	1.12281	0.149851	0.324405	4.7031	2.23361	up
KMW0122	GC-MS	C7H14O	Heptanal	庚醛	Aldehyde	醛	-	-	111-71-7	51728.1	58573.8	17270.5	101904	73180.5	119295	1.07069	0.0401775	0.225278	2.30754	1.20636	up
XMW0488	GC-MS	C6H11NO	2-Acetylpyrrolidine	2-乙酰基吡咯烷	Heterocyclic compound	杂环化合物	-	-	60026-20-2	58473.1	29452.4	33356	358365	267556	180218	1.34327	0.0434829	0.225278	6.64685	2.73267	up
XMW0765	GC-MS	C7H12O	4-Heptenal	顺-4-庚烯醛	Aldehyde	醛	-	-	62238-34-0	6094.78	6906.45	3745.77	38144.6	22236.2	40015.4	1.3497	0.0354517	0.225278	5.99488	2.58373	up
KMW0123	GC-MS	C7H12O	4-Heptenal, (Z)-	4庚醛	Aldehyde	醛	-	-	6728-31-0	1514.74	2779.73	1279.14	11689.7	6958.18	13367.9	1.32766	0.0379181	0.225278	5.74418	2.5221	up
D373	GC-MS	C7H12O	2,4-Heptadien-1-ol, (E,E)-	（E，E）-2,4-庚二烯-1-醇	Alcohol	醇	-	-	33467-79-7	6.94306e+06	6.70458e+06	4.35799e+06	3.59235e+07	2.68645e+07	1.81763e+07	1.33352	0.0514819	0.225278	4.49661	2.16884	up
XMW0276	GC-MS	C7H12O	4-Hexen-3-one, 5-methyl-	5-甲基-4-己烯-3-酮	Ketone	酮	-	-	13905-10-7	20895.8	34605.5	29026.7	65795.4	74098.6	105126	1.30899	0.0358809	0.225278	2.89869	1.5354	up
GMW0039	GC-MS	C5H4O3	2-Furancarboxylic acid	2-呋喃甲酸	Heterocyclic compound	杂环化合物	-	-	88-14-2	178953	78854.8	49887.8	8860.2	7076.94	18455.9	1.27358	0.14405	0.317387	0.111776	-3.16132	down
KMW0136	GC-MS	C6H9NO	2-Acetyl-1-pyrroline	乙酰吡咯啉	Heterocyclic compound	杂环化合物	-	-	85213-22-5	29400.8	21391.8	32481.8	59352.6	63440.9	72304.7	1.33327	0.00195118	0.12376	2.34284	1.22826	up
XMW1467	GC-MS	C6H10N2	1H-Pyrazole, 1,3,5-trimethyl-	1,3,5-三甲基-1H-吡唑	Heterocyclic compound	杂环化合物	-	-	1072-91-9	20192.5	19391.1	16399.6	5.29194e+06	3.35401e+06	6.05829e+06	1.40017	0.0261021	0.22075	262.654	8.03702	up
XMW0884	GC-MS	C7H10O	5-Hexenal, 4-methylene-	4-亚甲基-5-己烯	Hydrocarbons	烃类	-	-	17844-21-2	18426.8	15460.8	20043.6	226739	184287	288898	1.39264	0.0191616	0.206249	12.9781	3.69801	up
XMW0910	GC-MS	C5H6N2O	1H-Imidazole, 1-acetyl-	1-乙酰基-1H-咪唑	Heterocyclic compound	杂环化合物	-	-	2466-76-4	502000	157042	498750	2.77216e+06	2.65767e+06	1.35107e+06	1.25603	0.0471287	0.225278	5.85676	2.5501	up
XMW0714	GC-MS	C6H7NO	3-Acetyl-1H-pyrroline	3-乙酰基-1H-吡咯啉	Heterocyclic compound	杂环化合物	-	-	1072-82-8	14359.1	9151.07	43036.9	79310.2	70024.8	93690.7	1.18085	0.0135125	0.188646	3.65193	1.86866	up
KMW0323	GC-MS	C7H8O	Benzyl Alcohol	苯甲醇	Alcohol	醇	-	-	100-51-6	6.72916e+06	2.34634e+06	3.09062e+06	5.64469e+07	3.91858e+07	2.42181e+07	1.32891	0.0583952	0.230553	9.8512	3.3003	up
XMW0651	GC-MS	C7H9N	Pyridine, 2,3-dimethyl-	2,3-二甲基吡啶	Heterocyclic compound	杂环化合物	-	-	583-61-9	1.18919e+06	370276	1.16611e+06	6.65107e+06	6.35205e+06	3.0407e+06	1.24974	0.0551088	0.229052	5.88641	2.55739	up
NMW0013	GC-MS	C7H9N	Benzylamine	苄胺	Aromatics	芳烃	-	-	100-46-9	10619.7	7555.01	11162.3	59636.9	59622.2	86157.5	1.3807	0.0205581	0.209835	7.00196	2.80776	up
XMW0114	GC-MS	C6H5NO	Benzene, nitroso-	亚硝基苯	Aromatics	芳烃	-	-	586-96-9	6.26039e+06	6.07483e+06	3.89357e+06	3.19923e+07	2.4222e+07	1.62929e+07	1.33268	0.0501976	0.225278	4.46781	2.15957	up
KMW0070	GC-MS	C8H10	Benzene, 1,3-dimethyl-	间二甲苯	Aromatics	芳烃	-	-	108-38-3	3861.99	4042.54	7132.74	17134.6	18731.8	6354.53	1.07126	0.136921	0.311974	2.80775	1.48942	up
KMW0158	GC-MS	C7H6O	BenzAldehyde	苯甲醛	Aldehyde	醛	-	-	100-52-7	55823.6	13073.7	33429.2	1.52479e+06	2.99585e+06	609889	1.33441	0.137331	0.312291	50.1388	5.64786	up
KMW0115	GC-MS	C8H8	Styrene	苯乙烯	Aromatics	芳烃	-	-	100-42-5	4498.68	5514.42	2603.86	9839.34	11740.7	7244.43	1.20095	0.0324562	0.225107	2.28458	1.19193	up
KMW0426	GC-MS	C7H5N	Benzonitrile	氰化苯	Aromatics	芳烃	-	-	100-47-0	11898.3	3805.34	106930	856202	865335	515930	1.22955	0.0191031	0.206249	18.2451	4.18944	up
WMW0187	GC-MS	C6H14O	2-Hexanol	2-己醇	Alcohol	醇	-	-	626-93-7	56076.3	56424.9	12821.4	186888	85705.1	295694	1.12467	0.128478	0.306348	4.5346	2.18097	up
XMW1116	GC-MS	C6H12O	4-Hexen-1-ol, (E)-	（E）-4-己烯-1-醇	Alcohol	醇	-	-	928-92-7	12168.6	4306.59	13920.6	30168.7	33399.4	38214.3	1.21488	0.00382548	0.140188	3.34856	1.74354	up
KMW0066	GC-MS	C6H12O	Hexanal	己醛	Aldehyde	醛	-	-	66-25-1	203760	254413	48161.2	814754	376206	1.43184e+06	1.13282	0.142816	0.317214	5.17998	2.37295	up
NMW0790	GC-MS	C5H8O2	2H-Pyran-2-one, tetrahydro-	四氢-2H-吡喃-2-酮	Ketone	酮	-	-	542-28-9	3442.03	3620.86	2937.53	51469.9	97947.9	23359	1.33911	0.130036	0.306699	17.277	4.11078	up
w28	GC-MS	C5H8O2	3(2H)-Furanone, dihydro-2-methyl-	二氢-2-甲基-3（2H）-呋喃酮	Ketone	酮	-	-	3188-00-9	200229	250923	47919.2	832038	389771	1.42831e+06	1.14516	0.135003	0.309382	5.31011	2.40874	up
NMW0017	GC-MS	C5H9NO	2-Pyrrolidinone, 1-methyl-	1-甲基-2-吡咯烷酮	Heterocyclic compound	杂环化合物	-	-	872-50-4	6864.39	9	9	38495.4	31658.8	25837.7	1.1363	0.00433519	0.150967	13.9475	3.80193	up
XMW1120	GC-MS	C4H5NS	Thiocyanic acid, 2-propenyl ester	硫氰酸烯丙酯	Ester	酯	-	-	764-49-8	17263.7	21562.3	5914.2	30615.5	23705.4	40691.2	1.01329	0.0692957	0.233277	2.12364	1.08654	up
KMW0067	GC-MS	C6H10O	3-Penten-2-one, 4-methyl-	4-甲基-3-戊烯-2-酮	Ketone	酮	-	-	141-79-7	13912.2	12116.2	5613.89	31089.5	15200.4	55125.7	1.08279	0.178206	0.351498	3.20507	1.68035	up
XMW1115	GC-MS	C6H10O	Isopropenyl ethyl ketone	异丙烯基乙基酮	Ketone	酮	-	-	25044-01-3	10012.4	8730.07	7826.12	27216.4	28439.4	43111.9	1.3648	0.0403708	0.225278	3.71747	1.89432	up
WMW0044	GC-MS	C6H10O	3-Hexenal	3-己烯醛	Aldehyde	醛	-	-	4440-65-7	111660	129934	31187.6	431785	186099	719698	1.13839	0.143306	0.317214	4.90348	2.29381	up
XMW0123	GC-MS	C4H3NO2	1H-Pyrrole-2,5-dione	1H-吡咯-2,5-二酮	Amine	胺	-	-	541-59-3	18104.9	12854.2	11197	62885.7	46461.7	34602.9	1.31955	0.046393	0.225278	3.41469	1.77176	up
KMW0129	GC-MS	C6H8O	2,4-Hexadienal, (E,E)-	2,4-己二醛	Aldehyde	醛	-	-	142-83-6	21292.6	23612.6	6456.61	36225.5	29037.9	47794.8	1.02718	0.0550427	0.229052	2.20121	1.13829	up
NMW0059	GC-MS	C5H6N2	4-Aminopyridine	4-氨基吡啶	Heterocyclic compound	杂环化合物	-	-	504-24-5	132897	125648	136630	1.77257e+06	1.10409e+06	1.37313e+06	1.39216	0.0220636	0.21559	10.7542	3.42683	up
KMW0060	GC-MS	C7H8	Toluene	甲苯	Aromatics	芳烃	-	-	108-88-3	32195.4	26781.3	32946.8	89038.1	44813.2	64071.4	1.21475	0.106861	0.275052	2.15312	1.10643	up
XMW0076	GC-MS	C5H4N2	1H-Pyrrole-3-carbonitrile	1H-吡咯-3-腈	Heterocyclic compound	杂环化合物	-	-	7126-38-7	5.72608e+06	1.90257e+06	2.60671e+06	5.32858e+07	3.63151e+07	2.19923e+07	1.32916	0.0624972	0.230553	10.9027	3.44662	up
KMW0048	GC-MS	C5H12O	1-Butanol, 3-methyl-	3-甲基-1-丁醇	Alcohol	醇	-	-	123-51-3	66573.5	59832.4	44874.5	170652	163308	232768	1.36019	0.0200551	0.207081	3.30877	1.7263	up
XMW0655	GC-MS	C4H8O2	2-Butene-1,4-diol, (Z)-	（Z）-2-丁烯-1,4-二醇	Alcohol	醇	-	-	6117-80-2	14945.8	15267.8	6035.96	27027.9	20072.2	33225.4	1.11519	0.0415083	0.225278	2.2159	1.1479	up
XMW1224	GC-MS	C2H4N2O2	Ethanediamide	乙二酰胺	Amine	胺	-	-	471-46-5	9128.3	3345.82	4974.89	38486.9	31623.8	22008.8	1.3094	0.0243508	0.218806	5.27936	2.40036	up
XMW0908	GC-MS	C2H4N2O2	1,2-HydrazinedicarboxAldehyde	1,2-肼二甲醛	Aldehyde	醛	-	-	628-36-4	1554.87	758.652	852.18	40551.6	38929.8	24800	1.3876	0.0210998	0.211714	32.941	5.04181	up
XMW0115	GC-MS	C4H9NO	5-Methyloxazolidine	5-甲基恶唑烷	Heterocyclic compound	杂环化合物	-	-	58328-22-6	27631	29302.2	8314.38	93900.4	39803.3	161394	1.12246	0.157022	0.33229	4.52274	2.1772	up
NMW0771	GC-MS	C4H9NO	N,N-Dimethylacetamide	N，N-二甲基乙酰胺	Amine	胺	-	-	127-19-5	11101	7006.29	10048.1	62130.6	56912.1	28405.8	1.32105	0.061121	0.230553	5.23697	2.38873	up
XMW0573	GC-MS	C4H8N2	1,5-Diazabicyclo[3.1.0]hexane	1,5-二氮杂双环[3.1.0]己烷	Heterocyclic compound	杂环化合物	-	-	13090-31-8	3979.78	2989.64	25320.5	67120	55433.6	78795.4	1.19578	0.00483664	0.154142	6.23565	2.64054	up
XMW1388	GC-MS	C4H8N2	1H-Imidazole, 4,5-dihydro-2-methyl-	1H-咪唑，4,5-二氢-2-甲基-	Heterocyclic compound	杂环化合物	-	-	534-26-9	22435.8	28013	8355.47	44539.3	29442	48934.8	1.02415	0.0618734	0.230553	2.09026	1.06368	up
KMW0047	GC-MS	C5H8O	2-Butenal, 2-methyl-	甲基-2-丁烯醛	Aldehyde	醛	-	-	1115-11-3	68256.1	56918.7	45384.6	156530	163461	239448	1.34908	0.0331893	0.225278	3.28002	1.71371	up
NMW0776	GC-MS	C4H4O2	2(5H)-Furanone	2（5H）-呋喃酮	Ketone	酮	-	-	497-23-4	12069.9	10022.5	13918.5	28302.9	22654.8	33933.5	1.31995	0.0273304	0.220879	2.35737	1.23718	up
XMW0132	GC-MS	C5H9N	Pyridine, 2,3,4,5-tetrahydro-	2,3,4,5-四氢吡啶	Heterocyclic compound	杂环化合物	-	-	505-18-0	58880.9	56349.3	43825.9	164451	156194	248719	1.35766	0.0407751	0.225278	3.57964	1.83982	up
