# Supplementary material for: Metabolomics Analysis Reveals the Differences Between Bupleurum chinense DC. and Bupleurum scorzonerifolium Willd
Source: Front Plant Sci. 2022 Jul 13;13:933849. doi: 10.3389/fpls.2022.933849 (PMC9328751; doi:10.3389/fpls.2022.933849)
Supplement: Supplementary file 4 [file Table_4.XLSX]

## Sheet: Sheet1
Index	Platform	Formula	Compounds	物质	Class I	物质一级分类	Class II	物质二级分类	CAS	BcL1	BcL2	BcL3	BsL1	BsL2	BsL3	VIP	p_value	FDR	Fold_Change	Log2FC	Type
pme1974	UPLC-MS/MS	C3H4O3	Pyruvic acid	丙酮酸	Organic acids	有机酸	Organic acids	有机酸	127-17-3	53800	38299	34580	100180	136460	74779	1.18453	0.0631635	0.157423	2.45833	1.29768	up
Lmbp000668	UPLC-MS/MS	C6H5NO2	Isonicotinic acid	异烟酸	Others	其它类	Vitamin	维生素	55-22-1	173890	135540	193380	665740	267560	452140	1.13565	0.121955	0.232995	2.75539	1.46226	up
mws0341	UPLC-MS/MS	C6H12O3	2-Hydroxyisocaproic acid	2-羟基异己酸	Organic acids	有机酸	Organic acids	有机酸	20312-37-2	245000	255850	151440	1097600	759660	1110700	1.27537	0.0155689	0.0986287	4.55006	2.18589	up
MWS1709	UPLC-MS/MS	C4H6O5	D-Malic acid	D-苹果酸	Organic acids	有机酸	Organic acids	有机酸	636-61-3	17966000	19085000	9639700	47275000	62770000	36049000	1.19905	0.0370726	0.121608	3.12897	1.64569	up
Lmbn000198	UPLC-MS/MS	C4H6O5	3-Dehydro-L-Threonic Acid	3-脱氢-L-苏糖酸	Others	其它类	Saccharides and Alcohols	糖及醇类	-	22926000	19853000	12254000	46675000	61812000	35153000	1.17475	0.0465076	0.136311	2.61007	1.38409	up
mws0275	UPLC-MS/MS	C4H6O5	L-Malic acid	L-苹果酸	Organic acids	有机酸	Organic acids	有机酸	97-67-6	4475500	3565400	2313000	12641000	17190000	8589100	1.21615	0.0562193	0.147545	3.71069	1.89169	up
pmb0374	UPLC-MS/MS	C5H5N5	2-Aminopurine	2-氨基嘌呤	Nucleotides and derivatives	核苷酸及其衍生物	Nucleotides and derivatives	核苷酸及其衍生物	452-06-2	70899	213740	56712	558430	548280	301590	1.14501	0.031117	0.115282	4.12567	2.04463	up
pme0040	UPLC-MS/MS	C5H5N5	Adenine	腺嘌呤	Nucleotides and derivatives	核苷酸及其衍生物	Nucleotides and derivatives	核苷酸及其衍生物	73-24-5	2388200	3292000	3232600	57892	62781	116200	1.31062	0.00980436	0.0967806	0.0265767	-5.23369	down
mws0889	UPLC-MS/MS	C4H8O5	D-Threonic Acid	D-苏糖酸	Others	其它类	Saccharides and Alcohols	糖及醇类	3909-12-4	1857100	2050900	1308900	4214700	3782300	3158900	1.22273	0.00820099	0.092265	2.13842	1.09654	up
pme1173	UPLC-MS/MS	C5H4N4O	Allopurinol	别嘌呤醇	Nucleotides and derivatives	核苷酸及其衍生物	Nucleotides and derivatives	核苷酸及其衍生物	315-30-0	55691	101500	158240	15201	8123.3	16158	1.23978	0.0890771	0.195728	0.125169	-2.99805	down
pme0033	UPLC-MS/MS	C5H4N4O	Hypoxanthine	次黄嘌呤	Nucleotides and derivatives	核苷酸及其衍生物	Nucleotides and derivatives	核苷酸及其衍生物	68-94-0	210190	141990	131620	13393	12611	15970	1.31174	0.0267067	0.111998	0.086759	-3.52684	down
mws1336	UPLC-MS/MS	C7H7NO2	4-Aminobenzoic acid	对氨基苯甲酸	Phenolic acids	酚酸类	Phenolic acids	酚酸类	150-13-0	41206	41401	61522	4442	12689	18424	1.14535	0.0158293	0.0986287	0.246689	-2.01924	down
pme1002	UPLC-MS/MS	C8H11NO	L-Tyramine	L-酪胺	Amino acids and derivatives	氨基酸及其衍生物	Amino acids and derivatives	氨基酸及其衍生物	51-67-2	50775	10222	52579	134450	295480	559000	1.12477	0.140754	0.255421	8.70721	3.12221	up
mws0749	UPLC-MS/MS	C7H6O3	4-Hydroxybenzoic acid	4-羟基苯甲酸	Phenolic acids	酚酸类	Phenolic acids	酚酸类	99-96-7	809400	683830	668580	232240	340940	274890	1.27839	0.00202039	0.072031	0.392296	-1.34998	down
Lmbn001981	UPLC-MS/MS	C7H6O3	2,5-Dihydroxybenzaldehyde	2,5-二羟基苯甲醛	Phenolic acids	酚酸类	Phenolic acids	酚酸类	1194-98-5	934210	804670	888140	384060	437560	318960	1.28567	0.000665707	0.05649	0.434173	-1.20366	down
Hmgn001653	UPLC-MS/MS	C7H6O3	Protocatechualdehyde	原儿茶醛	Phenolic acids	酚酸类	Phenolic acids	酚酸类	139-85-5	947270	818750	856760	327700	415440	281510	1.2817	0.000626824	0.056056	0.390673	-1.35597	down
mws0336	UPLC-MS/MS	C6H6N2O2	Urocanic acid	尿刊酸	Organic acids	有机酸	Organic acids	有机酸	104-98-3	286180	193090	328090	30849	70236	116550	1.14292	0.0200381	0.101539	0.269564	-1.8913	down
pme0295	UPLC-MS/MS	C6H11NO3	4-Acetamidobutyric acid	4-乙酰氨基丁酸	Organic acids	有机酸	Organic acids	有机酸	3025-96-5	4590800	1343400	2175400	575450	1330500	844790	1.01102	0.203683	0.320356	0.339196	-1.55981	down
Zmyn000247	UPLC-MS/MS	C5H8O5	2-Hydroxyglutaric Acid	2-羟基戊二酸	Organic acids	有机酸	Organic acids	有机酸	13095-48-2	446020	369070	382450	749940	1214200	959990	1.24885	0.046527	0.136311	2.44178	1.28793	up
Lmbn000216	UPLC-MS/MS	C5H8O5	3-Methylmalic acid	3-甲基苹果酸	Organic acids	有机酸	Organic acids	有机酸	152204-30-3	501260	325570	349170	845060	1147300	1028400	1.25011	0.00691638	0.092265	2.56867	1.36102	up
pmb2826	UPLC-MS/MS	C5H8O5	L-Citramalic acid	2-甲基苹果酸	Organic acids	有机酸	Organic acids	有机酸	6236-09-5	852830	566500	723840	1415200	2188900	1972400	1.23641	0.0272322	0.111998	2.60199	1.37961	up
ML10171848	UPLC-MS/MS	C5H8O5	D-Arabinono-1,4-lactone	D-阿拉伯-1,4-内酯	Others	其它类	Saccharides and Alcohols	糖及醇类	2782-09-4	83213	90052	70861	132720	257190	180190	1.18331	0.092355	0.199833	2.33527	1.22359	up
Lmgp000796	UPLC-MS/MS	C8H7NO2	4-Hydroxymandelonitrile	4-羟基扁桃腈	Alkaloids	生物碱	Phenolamine	酚胺	13093-65-7	1989400	1808800	1526500	4662900	3006900	4042600	1.23255	0.0395672	0.124794	2.19964	1.13726	up
pme1210	UPLC-MS/MS	C5H11NO2S	L-Methionine	L-甲硫氨酸	Amino acids and derivatives	氨基酸及其衍生物	Amino acids and derivatives	氨基酸及其衍生物	63-68-3	1595300	1661000	1511400	3915300	2768600	3368600	1.27305	0.0317377	0.116852	2.10846	1.07619	up
mws0847	UPLC-MS/MS	C6H7N5	1-Methyladenine	1-甲基腺嘌呤	Nucleotides and derivatives	核苷酸及其衍生物	Nucleotides and derivatives	核苷酸及其衍生物	5142-22-3	13613	20111	20549	80306	52111	46727	1.24671	0.0516214	0.141877	3.30079	1.72281	up
Lmxp001668	UPLC-MS/MS	C9H10O2	2-Methoxy-4-ethenylphenol	2-甲氧基-4-乙烯基苯酚	Phenolic acids	酚酸类	Phenolic acids	酚酸类	7786-61-0	27690	31629	58593	95891	64762	84855	1.10125	0.0332839	0.118781	2.08213	1.05806	up
pme2589	UPLC-MS/MS	C6H8O5	2-Oxoadipic acid	2-氧代己二酸	Organic acids	有机酸	Organic acids	有机酸	3184-35-8	9	9	9	223390	1398800	295040	1.31494	0.234994	0.35416	71008.5	16.1157	up
mws1346	UPLC-MS/MS	C6H11NO4	DL-2-Aminoadipic acid	DL-2-氨基己二酸	Alkaloids	生物碱	Alkaloids	生物碱	542-32-5	113820	136090	102480	396150	973810	302860	1.18098	0.170577	0.289308	4.74707	2.24704	up
pme3382	UPLC-MS/MS	C6H11NO4	N-Acetyl-L-threonine	N-乙酰-L-苏氨酸	Amino acids and derivatives	氨基酸及其衍生物	Amino acids and derivatives	氨基酸及其衍生物	17093-74-2	90811	129230	80938	38861	57861	39426	1.18676	0.0487157	0.138766	0.45235	-1.14449	down
pme2914	UPLC-MS/MS	C6H10O5	3-Hydroxy-3-methylpentane-1,5-dioic acid	3-羟基-3-甲基谷氨酸	Amino acids and derivatives	氨基酸及其衍生物	Amino acids and derivatives	氨基酸及其衍生物	503-49-1	283700	255570	179800	5680500	875900	1031600	1.12677	0.283463	0.403137	10.5525	3.39952	up
Lmqp008175	UPLC-MS/MS	C10H10O2	Methyl Cinnamate	肉桂酸甲酯	Phenolic acids	酚酸类	Phenolic acids	酚酸类	103-26-4	20318	6073.6	28886	121260	116710	61145	1.14569	0.0404401	0.1262	5.41114	2.43593	up
mws0159	UPLC-MS/MS	C9H8O3	Phenylpyruvic acid	苯丙酮酸	Organic acids	有机酸	Organic acids	有机酸	156-06-9	23690	37700	40714	20698	14019	12679	1.13426	0.0552006	0.14573	0.464193	-1.1072	down
pme3083	UPLC-MS/MS	C8H7NO3	2-(Formylamino)benzoic acid	2-(甲酰氨基)苯甲酸	Phenolic acids	酚酸类	Phenolic acids	酚酸类	3342-77-6	189500	319100	452450	135590	120440	175830	1.06264	0.140163	0.255421	0.449363	-1.15405	down
pme0282	UPLC-MS/MS	C8H6O4	Phthalic acid	邻苯二甲酸	Organic acids	有机酸	Organic acids	有机酸	88-99-3	46227	87488	72911	178280	177850	172650	1.2354	0.0110695	0.0986287	2.55912	1.35565	up
pme0281	UPLC-MS/MS	C8H6O4	Terephthalic acid	对苯二甲酸	Phenolic acids	酚酸类	Phenolic acids	酚酸类	100-21-0	385810	724410	541380	1663900	1859700	1558800	1.25964	0.00101625	0.0585686	3.07726	1.62165	up
mws0344	UPLC-MS/MS	C5H10O6	D-Xylonic acid	D-木糖酸	Others	其它类	Saccharides and Alcohols	糖及醇类	526-91-0	8696700	7582400	7563000	18200000	13553000	16774000	1.27173	0.0206906	0.102135	2.03535	1.02528	up
Lmrn003000	UPLC-MS/MS	C9H10O3	2-Hydroxy-3-phenylpropanoic acid	2-羟基-3-苯基丙酸	Phenolic acids	酚酸类	Phenolic acids	酚酸类	7326-19-4	821950	328530	345440	5165800	7579000	7570200	1.28328	0.0132821	0.0986287	13.5803	3.76344	up
Lmbn005172	UPLC-MS/MS	C9H10O3	2,6-Dimethoxybenzaldehyde	2,6-二甲氧基苯甲醛	Phenolic acids	酚酸类	Phenolic acids	酚酸类	3392-97-0	543690	167230	189640	5023800	6879200	8497200	1.28081	0.0216985	0.105072	22.6528	4.50162	up
MWS0274	UPLC-MS/MS	C9H10O3	DL-3-Phenyllactic acid	DL-3-苯基乳酸	Organic acids	有机酸	Organic acids	有机酸	828-01-3	290200	85972	144620	2797300	3819800	5622900	1.27995	0.0412623	0.127655	23.5027	4.55475	up
mws0467	UPLC-MS/MS	C9H10O3	3-(4-Hydroxyphenyl)-propionic acid	3-(4-羟基苯基)丙酸	Phenolic acids	酚酸类	Phenolic acids	酚酸类	501-97-3	758050	241460	274120	7166100	9255400	12617000	1.28186	0.0270857	0.111998	22.7998	4.51095	up
MWSmce165	UPLC-MS/MS	C6H14O5	L-Fucitol	L-岩藻糖醇	Others	其它类	Saccharides and Alcohols	糖及醇类	13074-06-1	986830	1017800	858040	2548500	1954100	2284800	1.2926	0.0118819	0.0986287	2.371	1.2455	up
pma2400	UPLC-MS/MS	C11H18O	Dihydrojasmone	二氢茉莉酮	Organic acids	有机酸	Organic acids	有机酸	1128-08-1	9	9	9	57231	27430	34678	1.32051	0.04732	0.13689	4419.96	12.1098	up
mws2125	UPLC-MS/MS	C3H5O6P	Phosphoenolpyruvate	磷酸烯醇式丙酮酸	Organic acids	有机酸	Organic acids	有机酸	138-08-9	8873.6	11292	4431.3	30307	27401	23152	1.20126	0.00291915	0.0800295	3.28741	1.71695	up
pme0253	UPLC-MS/MS	C8H15NO3	N-Acetyl-L-leucine	N-乙酰-L-亮氨酸	Amino acids and derivatives	氨基酸及其衍生物	Amino acids and derivatives	氨基酸及其衍生物	1188-21-2	105980	68443	92794	37676	59798	34890	1.13997	0.0339428	0.118781	0.495343	-1.0135	down
MA10039492	UPLC-MS/MS	C6H6O6	Dehydroascorbic acid	脱氢抗坏血酸	Others	其它类	Vitamin	维生素	490-83-5	5491600	3324700	6228400	464320	1496800	1350000	1.17302	0.0338284	0.118781	0.220085	-2.18386	down
pme2550	UPLC-MS/MS	C6H6O6	Cis-Aconitic acid	顺式乌头酸	Organic acids	有机酸	Organic acids	有机酸	585-84-2	9580200	7326500	11222000	1228200	3225900	3307100	1.1795	0.0113331	0.0986287	0.275917	-1.85769	down
mws0154	UPLC-MS/MS	C7H10O5	Shikimic acid	莽草酸	Organic acids	有机酸	Organic acids	有机酸	138-59-0	30727000	19043000	29314000	3543200	6772000	10951000	1.17736	0.0173733	0.0992405	0.268906	-1.89482	down
mws0242	UPLC-MS/MS	C8H14O4	Suberic Acid	辛二酸	Organic acids	有机酸	Organic acids	有机酸	505-48-6	72699	70010	117810	31002	33700	13352	1.16138	0.0438917	0.132793	0.29961	-1.73884	down
mws4175	UPLC-MS/MS	C6H8O6	D-Glucurono-6,3-lactone	D-葡萄糖醛酸-6,3-内酯	Others	其它类	Saccharides and Alcohols	糖及醇类	32449-92-6	106770	73988	120780	274090	240600	247230	1.25629	0.00127659	0.0585686	2.52678	1.3373	up
Lmbn001754	UPLC-MS/MS	C7H12O5	3-Isopropylmalic Acid	3-异丙基苹果酸	Organic acids	有机酸	Organic acids	有机酸	921-28-8	6419300	5016700	8987600	14145000	36391000	18137000	1.14783	0.139679	0.255289	3.36243	1.74951	up
pmb3101	UPLC-MS/MS	C7H12O5	2-Isopropylmalic Acid	2-异丙基苹果酸	Organic acids	有机酸	Organic acids	有机酸	49601-06-1	5265600	4514400	7521700	11860000	30883000	14632000	1.14402	0.150328	0.268421	3.31615	1.72951	up
Zmgn001448	UPLC-MS/MS	C7H12O5	2-Propylmalic Acid	2-丙基苹果酸	Organic acids	有机酸	Organic acids	有机酸	-	6128500	4221100	9090400	14024000	36486000	17566000	1.13244	0.140651	0.255421	3.50185	1.80812	up
pme0516	UPLC-MS/MS	C6H12O6	Inositol	肌醇	Others	其它类	Saccharides and Alcohols	糖及醇类	87-89-8	607530	796530	426090	1668900	1477400	1261700	1.21328	0.00581886	0.092265	2.40855	1.26816	up
Hmtn001288	UPLC-MS/MS	C9H10O4	Methyl 2,4-dihydroxyphenylacetate	2,4-二羟基苯乙酸甲酯	Phenolic acids	酚酸类	Phenolic acids	酚酸类	67828-42-6	34661	31017	29996	503520	456070	404990	1.31994	0.00441414	0.0864396	14.2628	3.83419	up
Lmrn001951	UPLC-MS/MS	C9H10O4	(S)-2-Hydroxy-3-(4-Hydroxyphenyl)Propanoic Acid	2-羟基-(4-羟基苯基)丙酸	Phenolic acids	酚酸类	Phenolic acids	酚酸类	23508-35-2	9	9	25285	271710	394760	226420	1.09	0.0262236	0.111998	35.2879	5.1411	up
Lmcn002039	UPLC-MS/MS	C9H12O4	Antiarol; 3,4,5-Trimethoxyphenol	3,4,5-三甲氧基苯酚	Phenolic acids	酚酸类	Phenolic acids	酚酸类	642-71-7	37871	31290	80677	581050	469760	538700	1.28455	0.00114038	0.0585686	10.6082	3.40711	up
Smcp001137	UPLC-MS/MS	C11H9NO2	naphthisoxazol A	naphthisoxazol A	Others	其它类	Others	其它	-	4849000	4244700	2367900	12102000	5869100	8654900	1.07362	0.0913534	0.198533	2.32306	1.21603	up
Zmzp000145	UPLC-MS/MS	C9H20N2O2	Trimethyllysine	三甲基赖氨酸	Amino acids and derivatives	氨基酸及其衍生物	Amino acids and derivatives	氨基酸及其衍生物	23284-33-5	56192	48316	26717	16085	19403	29471	1.01461	0.113199	0.223142	0.49502	-1.01444	down
pme0075	UPLC-MS/MS	C7H11NO5	N-Acetyl-L-glutamic acid	N-乙酰-L-谷氨酸	Amino acids and derivatives	氨基酸及其衍生物	Amino acids and derivatives	氨基酸及其衍生物	1188-37-0	64400	63744	62575	40883	32906	16923	1.10309	0.0411722	0.127598	0.475632	-1.07208	down
pmp001232	UPLC-MS/MS	C12H14O2	Neoligustilide	新藁本内脂	Others	其它类	Others	其它	-	77386	38307	77448	9	9	9	1.32084	0.0386531	0.123885	0.000139794	-12.8044	down
MWSmce658	UPLC-MS/MS	C10H8O4	Noreugenin; 5,7-Dihydroxy-2-Methylchromone	去甲丁香色原酮; 5,7-二羟基-2-甲基色酮	Phenolic acids	酚酸类	Phenolic acids	酚酸类	1013-69-0	734950	2185600	339090	9	9	1809.1	1.23511	0.192681	0.309053	0.000560522	-10.8009	down
MWSCX014	UPLC-MS/MS	C10H8O4	Scopoletin (7-Hydroxy-6-methoxycoumarin)	东莨菪内酯	Lignans and Coumarins	木脂素和香豆素	Coumarins	香豆素	92-61-5	574040	1124100	974480	341500	40716	269380	1.01909	0.0347637	0.119592	0.243804	-2.03621	down
Hmcp002123	UPLC-MS/MS	C10H8O4	Isoscopoletin (6-Hydroxy-7-Methoxycoumarin)	异莨菪亭	Lignans and Coumarins	木脂素和香豆素	Coumarins	香豆素	776-86-3	743710	1044600	993180	447560	56115	319660	1.00314	0.0128038	0.0986287	0.296005	-1.75631	down
Lmdn003756	UPLC-MS/MS	C10H10O4	Methyl caffeate	咖啡酸甲酯	Phenolic acids	酚酸类	Phenolic acids	酚酸类	3843-74-1	96782	110730	222020	57095	53241	91287	1.00316	0.188022	0.304254	0.469402	-1.09111	down
pme0534	UPLC-MS/MS	C6H12O7	Gluconic acid	葡萄糖酸	Others	其它类	Saccharides and Alcohols	糖及醇类	526-95-4	1159600	1038600	991080	3115300	2409200	2395200	1.29179	0.0184326	0.0992457	2.48323	1.31222	up
mws0027	UPLC-MS/MS	C9H10O5	Syringic acid	丁香酸	Phenolic acids	酚酸类	Phenolic acids	酚酸类	530-57-4	9	8559.8	5759.8	150330	125360	118380	1.00607	0.00377689	0.0841302	27.5023	4.78148	up
mws0282	UPLC-MS/MS	C11H12N2O2	L-Tryptophan	L-色氨酸	Amino acids and derivatives	氨基酸及其衍生物	Amino acids and derivatives	氨基酸及其衍生物	73-22-3	3140000	3121400	1880500	8030600	4730900	5405800	1.14515	0.0637535	0.158009	2.23133	1.15791	up
pmb0818	UPLC-MS/MS	C11H11NO3	Methoxyindoleacetic acid	甲氧基吲哚乙酸	Alkaloids	生物碱	Plumerane	吲哚类生物碱	3471-31-6	263870	216660	110250	762010	340010	492180	1.08138	0.0998243	0.208299	2.69847	1.43214	up
pme1261	UPLC-MS/MS	C9H19NO4	D-Panthenol	D-泛酰醇	Others	其它类	Saccharides and Alcohols	糖及醇类	81-13-0	12703	29594	9265	6227.8	6963.4	4938.5	1.039	0.217226	0.336607	0.35161	-1.50795	down
pma6599	UPLC-MS/MS	C11H10O4	6-Hydroxymethylherniarin	6-羟甲基脱肠草素	Lignans and Coumarins	木脂素和香豆素	Coumarins	香豆素	117597-79-2	480240	395760	449780	16285	42119	16503	1.29298	0.00147429	0.0610975	0.0565003	-4.1456	down
mws4173	UPLC-MS/MS	C11H10O4	5,7-Dimethoxycoumarin (Limettin)(Citropten)	5,7-二甲氧基香豆素 (柠檬内酯)(柠檬油素)	Lignans and Coumarins	木脂素和香豆素	Coumarins	香豆素	487-06-9	20623000	81381000	23166000	132020	34064	35692	1.29635	0.17063	0.289308	0.00161202	-9.27692	down
mws1076	UPLC-MS/MS	C11H10O4	Scoparone	滨蒿内酯	Lignans and Coumarins	木脂素和香豆素	Coumarins	香豆素	120-08-1	49822	67429	38591	9	17397	9	1.01824	0.0139153	0.0986287	0.111748	-3.16168	down
MA10107783	UPLC-MS/MS	C10H8O5	3-[(1-Carboxyvinyl)oxy]benzoic acid	3-[(1-羧乙烯基)氧基]苯甲酸	Phenolic acids	酚酸类	Phenolic acids	酚酸类	16929-37-6	4202200	1219000	1290000	25146000	35458000	33565000	1.26477	0.00721602	0.092265	14.0316	3.81061	up
pmb2620	UPLC-MS/MS	C11H12O4	3,4-Dimethoxycinnamic acid	3,4-二甲氧基肉桂酸	Phenolic acids	酚酸类	Phenolic acids	酚酸类	14737-89-4	17845	16625	42245	75970	47475	96575	1.10282	0.0574151	0.149363	2.86802	1.52005	up
Zmpn000199	UPLC-MS/MS	C6H10O8	D-Galactaric acid	D-半乳糖二酸	Others	其它类	Saccharides and Alcohols	糖及醇类	526-99-8	3092000	10686000	3058700	17047000	14518000	17412000	1.10345	0.0393881	0.124671	2.90894	1.5405	up
mws0853	UPLC-MS/MS	C11H14O4	Sinapyl alcohol	芥子醇	Phenolic acids	酚酸类	Phenolic acids	酚酸类	537-33-7	204220	422870	295580	1079500	760300	558800	1.14442	0.066833	0.161377	2.59963	1.37831	up
MWSmce355	UPLC-MS/MS	C10H12O5	Methyl Syringate	丁香酸甲酯	Phenolic acids	酚酸类	Phenolic acids	酚酸类	884-35-5	9	9	9	33087	28175	16648	1.32058	0.0334598	0.118781	2885.56	11.4946	up
mws0863	UPLC-MS/MS	C5H11O7P	2-Deoxyribose-5'-phosphate	2-脱氧核糖-5'-磷酸	Nucleotides and derivatives	核苷酸及其衍生物	Nucleotides and derivatives	核苷酸及其衍生物	102916-66-5	39268	15349	27237	7170.1	11427	7430.8	1.15423	0.109308	0.218021	0.31798	-1.65299	down
Lmmp003517	UPLC-MS/MS	C13H20O3	Solatuberenol A	Solatuberenol A	Others	其它类	Others	其它	-	183270	269650	206800	7134200	5594700	3620000	1.30991	0.0357278	0.120353	24.7816	4.6312	up
Lmyp003951	UPLC-MS/MS	C11H14O5	3-Hydroxy-1-(4-hydroxy-3,5-dimethoxyphenyl)propan-1-one	3-羟基-1-(4-羟基-3,5-二甲氧基苯基)丙-1-酮	Phenolic acids	酚酸类	Phenolic acids	酚酸类	-	90934	66456	96485	287580	168390	113780	1.04151	0.173079	0.292347	2.24421	1.16621	up
Cmsp002787	UPLC-MS/MS	C11H14O5	3,4'-Dihydroxy-3',5'-dimethoxypropiophenone	3,4'-二羟基-3',5'-二甲氧基苯乙酮	Phenolic acids	酚酸类	Phenolic acids	酚酸类	136196-47-9	183900	243850	119750	1907200	1110500	1200900	1.28097	0.0375307	0.122043	7.70521	2.94583	up
Zmnn007376	UPLC-MS/MS	C14H12O3	Xanthyletin	花椒内酯	Lignans and Coumarins	木脂素和香豆素	Coumarins	香豆素	553-19-5	147690	113980	91763	26956	16437	20332	1.28867	0.0239193	0.110712	0.180303	-2.47151	down
pmb0962	UPLC-MS/MS	C10H22N2O4	L-Lysine-Butanoic Acid	L-赖氨酸丁酸酯	Amino acids and derivatives	氨基酸及其衍生物	Amino acids and derivatives	氨基酸及其衍生物	80407-71-2	82283	41883	76275	24248	19643	21526	1.22646	0.0685007	0.164957	0.326365	-1.61544	down
Hmlp006964	UPLC-MS/MS	C12H12O5	5,6,7-Trimethoxycoumarin	5,6,7-三甲氧基香豆素	Lignans and Coumarins	木脂素和香豆素	Coumarins	香豆素	55085-47-7	18152	87056	27436	9	9	9	1.31263	0.177161	0.29699	0.000203552	-12.2623	down
MWSHY0202	UPLC-MS/MS	C16H12O2	6-Methylflavone	6-甲基黄酮	Flavonoids	黄酮	Flavones	黄酮	29976-75-8	43919	30070	17523	88480	55665	57414	1.06537	0.0547075	0.145289	2.20254	1.13917	up
mws0984	UPLC-MS/MS	C9H11N5O3	L-Sepiapterin	L-墨喋呤	Nucleotides and derivatives	核苷酸及其衍生物	Nucleotides and derivatives	核苷酸及其衍生物	17094-01-8	62033	8251.5	60322	9	9	9	1.30634	0.132505	0.245963	0.000206728	-12.24	down
pmb2591	UPLC-MS/MS	C13H14N2O3	N-Acetyl-L-Tryptophan	N-乙酰-L-色氨酸	Amino acids and derivatives	氨基酸及其衍生物	Amino acids and derivatives	氨基酸及其衍生物	1218-34-4	138660	77935	85430	1735800	1460800	744800	1.28299	0.0539232	0.14456	13.0499	3.70597	up
Lmrj002087	UPLC-MS/MS	C10H18N2O5	L-Isoleucyl-L-Aspartate	L-异亮氨酰-L-天冬氨酸	Amino acids and derivatives	氨基酸及其衍生物	Amino acids and derivatives	氨基酸及其衍生物	-	1029200	855490	813940	418330	339020	326220	1.2891	0.00673295	0.092265	0.401526	-1.31643	down
mws1090	UPLC-MS/MS	C6H13O9P	Glucose-1-phosphate	葡萄糖-1-磷酸	Others	其它类	Saccharides and Alcohols	糖及醇类	59-56-3	99638	92902	114530	59840	46916	43941	1.26171	0.00366774	0.0841302	0.490758	-1.02692	down
pmp001244	UPLC-MS/MS	C14H20NO4+	Caffeoylcholine	咖啡酰胆碱	Alkaloids	生物碱	Alkaloids	生物碱	87189-10-4	9	9	9	70487	53128	342960	1.31187	0.239359	0.357534	17280.6	14.0769	up
pme0230	UPLC-MS/MS	C10H13N5O4	Adenosine	腺苷	Nucleotides and derivatives	核苷酸及其衍生物	Nucleotides and derivatives	核苷酸及其衍生物	58-61-7	5037000	5558900	1027100	12880000	12588000	9399700	1.01311	0.0146642	0.0986287	2.99989	1.58491	up
mws1175	UPLC-MS/MS	C16H14O4	Pinostrobin	球松素	Flavonoids	黄酮	Flavanones	二氢黄酮	480-37-5	61081	74394	30891	13071	9968.5	17315	1.20485	0.0786892	0.181263	0.242565	-2.04356	down
mws1491	UPLC-MS/MS	C18H32O2	Linoleic acid	亚油酸	Lipids	脂质	Free fatty acids	游离脂肪酸	60-33-3	11564000	15245000	11682000	29487000	19591000	30114000	1.19918	0.0451205	0.134008	2.05742	1.04083	up
mws2623	UPLC-MS/MS	C18H34O2	11-Octadecanoic acid(Vaccenic acid)	11-十八碳烯酸	Lipids	脂质	Free fatty acids	游离脂肪酸	506-17-2	1045100	719500	990500	2092200	1721700	2858600	1.21159	0.0499171	0.140195	2.42187	1.27612	up
mws0668	UPLC-MS/MS	C10H12N4O6	Xanthosine	黄苷	Nucleotides and derivatives	核苷酸及其衍生物	Nucleotides and derivatives	核苷酸及其衍生物	146-80-5	126070	223370	73043	232210	302620	422840	1.02318	0.0690539	0.165468	2.26677	1.18064	up
mws1068	UPLC-MS/MS	C15H10O6	Kaempferol (3,5,7,4'-Tetrahydroxyflavone)	山奈酚	Flavonoids	黄酮	Flavonols	黄酮醇	520-18-3	602250	823010	160060	12733	8307.8	6220.4	1.27272	0.116679	0.227543	0.017196	-5.86178	down
pmn001511	UPLC-MS/MS	C13H18O7	3-Hydroxy-5-Methylphenol-1-O-Glucoside	3-羟基-5-甲基苯酚-1-氧-葡萄糖苷	Phenolic acids	酚酸类	Phenolic acids	酚酸类	-	9	9	9	603430	358470	195370	1.31991	0.0829187	0.187569	42861.9	15.3874	up
MWSslk035	UPLC-MS/MS	C13H18O7	Orcinol glucoside	苔黑酚葡萄糖苷	Phenolic acids	酚酸类	Phenolic acids	酚酸类	21082-33-7	9	9	9	553260	314390	168060	1.31957	0.0914676	0.198533	38359.6	15.2273	up
pmb3081	UPLC-MS/MS	C6H11PO11	Glucarate O-Phosphoric acid	磷酸葡萄糖酸	Others	其它类	Saccharides and Alcohols	糖及醇类	-	4713500	3825600	3410300	1026900	1392600	2449300	1.15185	0.0150433	0.0986287	0.407451	-1.2953	down
pme3163	UPLC-MS/MS	C7H15O10P	D-Sedoheptuiose 7-phosphate	D-景天庚酮糖 7-磷酸	Others	其它类	Saccharides and Alcohols	糖及醇类	2646-35-7	6104200	5239600	4454300	1934200	1900000	2313600	1.28825	0.0157225	0.0986287	0.389148	-1.36161	down
mws0724	UPLC-MS/MS	C10H13N5O6	8-Hydroxyguanosine	8-羟基鸟苷	Nucleotides and derivatives	核苷酸及其衍生物	Nucleotides and derivatives	核苷酸及其衍生物	3868-31-3	188080	201320	127740	42126	45375	34383	1.28808	0.02627	0.111998	0.235689	-2.08505	down
Lmmn002230	UPLC-MS/MS	C15H8O7	Demethylwedelolactone	去甲基蟛蜞菊内酯	Lignans and Coumarins	木脂素和香豆素	Coumarins	香豆素	6468-55-9	3427900	5292300	1170900	549210	184900	178000	1.18394	0.127152	0.239014	0.0922152	-3.43885	down
Lmjp004941	UPLC-MS/MS	C16H12O6	Rhamnocitrin (7-MethylKaempferol)	鼠李柠檬素	Flavonoids	黄酮	Flavones	黄酮	569-92-6	18443	7630.9	15740	210430	84071	148070	1.25609	0.0660375	0.16069	10.5843	3.40385	up
MWS20189	UPLC-MS/MS	C16H12O6	Tectorigenin	鸢尾黄素	Flavonoids	黄酮	Isoflavones	异黄酮	548-77-6	15601	15241	10830	215190	79624	166450	1.27516	0.0715887	0.168968	11.0689	3.46844	up
Hmtn001302	UPLC-MS/MS	C13H16O8	Glucosyloxybenzoic acid	葡萄糖氧基苯甲酸	Phenolic acids	酚酸类	Phenolic acids	酚酸类	-	19693000	23494000	26255000	9714300	4322300	9916800	1.1781	0.00457978	0.0877546	0.344941	-1.53558	down
pme3514	UPLC-MS/MS	C15H10O7	Morin	桑色素	Flavonoids	黄酮	Flavonols	黄酮醇	480-16-0	4555400	6390100	2130100	1064700	379530	600180	1.19165	0.0928518	0.199833	0.156353	-2.67712	down
Zmpp002571	UPLC-MS/MS	C15H10O7	Robinetin	刺槐亭	Flavonoids	黄酮	Flavonols	黄酮醇	490-31-3	128790	236630	153160	96420	59120	71111	1.14644	0.0841424	0.188844	0.437061	-1.19409	down
mws1326	UPLC-MS/MS	C15H10O7	Herbacetin	草质素	Flavonoids	黄酮	Flavonols	黄酮醇	527-95-7	6856.9	10465	6040.5	9	9	9	1.3202	0.029209	0.112178	0.0011557	-9.75701	down
Hmcn002875	UPLC-MS/MS	C15H10O7	6-Hydroxyluteolin	6-羟基木犀草素	Flavonoids	黄酮	Flavones	黄酮	18003-33-3	32627	61192	23126	8955.8	9	9	1.04348	0.0795003	0.181861	0.0767352	-3.70397	down
Zmhn000892	UPLC-MS/MS	C13H18O8	4-O-Glucosyl-3,4-dihydroxybenzyl alcohol	4-O-葡萄糖基-3,4-二羟基苄醇	Phenolic acids	酚酸类	Phenolic acids	酚酸类	-	367820	215900	176840	802800	700340	1018600	1.22687	0.009815	0.0967806	3.31564	1.72929	up
Hmsn002598	UPLC-MS/MS	C13H18O8	Salirepin	柳匍匐次苷	Phenolic acids	酚酸类	Phenolic acids	酚酸类	26652-12-0	233330	293990	339190	124320	73761	94660	1.2507	0.0125002	0.0986287	0.337839	-1.56559	down
Zmyn004449	UPLC-MS/MS	C18H30O4	9-Hydroxy-12-oxo-10(E),15(Z)-octadecadienoic acid	9-羟基-12-氧代-10(E),15(Z)-十八碳二烯酸	Lipids	脂质	Free fatty acids	游离脂肪酸	-	48470	45852	42155	14603	20818	10932	1.25042	0.00190351	0.0714409	0.33964	-1.55792	down
Lmlp004754	UPLC-MS/MS	C14H17NO7	Ehretioside B	2-(葡萄糖基氧基)-4-羟基苯乙腈	Alkaloids	生物碱	Alkaloids	生物碱	156368-84-2	84029	62612	101870	43115	38470	23811	1.16886	0.0336488	0.118781	0.42411	-1.23749	down
Jmbn003691	UPLC-MS/MS	C15H20O7	3,4-dihydroxy-allylbenzene-3-O-β-D-glucopyranoside	3,4-二羟基烯丙基-3-O-β-D-葡萄吡喃糖苷	Others	其它类	Others	其它	-	542940	380510	540340	1002000	1405200	1106300	1.24472	0.0172105	0.0992405	2.40028	1.2632	up
Lmbn005487	UPLC-MS/MS	C18H34O4	12,13-DHOME; (9Z)-12,13-Dihydroxyoctadec-9-enoic acid	12,13-二羟基十八烷基-9-烯酸	Lipids	脂质	Free fatty acids	游离脂肪酸	263399-35-5	18563	39606	29098	81104	77090	51383	1.14754	0.0277984	0.111998	2.40156	1.26397	up
Lmyp010328	UPLC-MS/MS	C20H30O3	2-Oxokovalenic acid	2-Oxokovalenic acid	Terpenoids	萜类	Ditepenoids	二萜	-	28880	52063	52085	9	9	9	1.32039	0.0290912	0.111998	0.000202965	-12.2665	down
mws0582	UPLC-MS/MS	C11H19N3O6S	S-(Methyl)glutathione	S-甲基谷胱甘肽	Amino acids and derivatives	氨基酸及其衍生物	Amino acids and derivatives	氨基酸及其衍生物	2922-56-7	11877	13548	18956	4290.9	5183.3	11309	1.03998	0.0625934	0.15688	0.46829	-1.09452	down
Hmpp003624	UPLC-MS/MS	C20H20O4	1-(4-Hydroxyphenyl)-7-(3-methoxy-4-hydroxyphenyl)-4,6-heptadiene-3-one	1-(4-羟基苯基)-7-(3-甲氧基-4-羟基苯基)-4,6-庚二烯-3-酮	Phenolic acids	酚酸类	Phenolic acids	酚酸类	-	552570	645020	257130	1086900	2100100	745430	1.00795	0.172009	0.291093	2.70322	1.43468	up
Lmsn000363	UPLC-MS/MS	C16H22O7	Raspberryketone glucoside	覆盆子苷	Phenolic acids	酚酸类	Phenolic acids	酚酸类	38963-94-9	620500	203390	654680	210880	78516	106180	1.06229	0.121849	0.232995	0.26754	-1.90218	down
Smjp002269	UPLC-MS/MS	C18H17NO5	N-[3-(4-Hydroxyphenyl)acryloyl]-L-tyrosine	N-[3-(4-羟基苯基)丙烯酰基]-L-酪氨酸	Amino acids and derivatives	氨基酸及其衍生物	Amino acids and derivatives	氨基酸及其衍生物	77201-66-2	9	9	9	173780	108540	156950	1.32163	0.0173742	0.0992405	16269.3	13.9899	up
pmn001690	UPLC-MS/MS	C16H24O7	3-Hydroxy-4-isopropylbenzylalcohol-3-O-glucoside	3-羟基-4-异丙基苯甲醇-3-O-葡萄糖苷	Phenolic acids	酚酸类	Phenolic acids	酚酸类	-	252220	575760	563520	26036	14440	37515	1.27555	0.0532638	0.144469	0.0560481	-4.15719	down
mws0884	UPLC-MS/MS	C10H12N5O6P	Cyclic 3',5'-Adenylic acid	环-3',5'-腺嘌呤核苷酸	Nucleotides and derivatives	核苷酸及其衍生物	Nucleotides and derivatives	核苷酸及其衍生物	60-92-4	181290	252160	59828	633990	498290	405920	1.08154	0.0168365	0.0992405	3.11832	1.64077	up
Lmtn002565	UPLC-MS/MS	C14H18O9	1-O-Vanilloyl-D-Glucose	1-O-香草酰-D-葡萄糖	Phenolic acids	酚酸类	Phenolic acids	酚酸类	-	219150	862720	67720	13152	8111	6710.5	1.19514	0.264752	0.385638	0.0243335	-5.36091	down
Lmmn003663	UPLC-MS/MS	C14H18O9	5-Glucosyloxy-2-Hydroxybenzoic acid methyl ester	5-葡萄糖氧基-2-羟基苯甲酸甲酯	Phenolic acids	酚酸类	Phenolic acids	酚酸类	-	223390	972330	57124	9	9	9	1.3044	0.276168	0.397521	2.1551e-05	-15.5019	down
pme3184	UPLC-MS/MS	C10H14N5O6P	2'-Deoxyadenosine-5'-monophosphate	2'-脱氧腺苷-5'-单磷酸	Nucleotides and derivatives	核苷酸及其衍生物	Nucleotides and derivatives	核苷酸及其衍生物	653-63-4	142450	186320	128910	718180	727530	492070	1.28896	0.0193653	0.100137	4.23392	2.08199	up
pmb0789	UPLC-MS/MS	C14H21NO8	Pyridoxine-5'-O-glucoside	吡哆醇-5'-O-葡萄糖苷	Others	其它类	Vitamin	维生素	-	389750	610690	370720	2038300	2343100	1679500	1.28573	0.00746728	0.092265	4.42027	2.14414	up
Zmhn001703	UPLC-MS/MS	C13H16O10	5-O-Galloyl-D-hamamelose	5-O-没食子酰-D-金缕梅糖	Phenolic acids	酚酸类	Phenolic acids	酚酸类	-	9	287360	9	2167300	1487800	2023300	1.04464	0.00527844	0.0909479	19.7593	4.30446	up
Lmfn000604	UPLC-MS/MS	C13H16O10	6-O-Galloyl-D-glucose	6-O-没食子酰-D-葡萄糖	Phenolic acids	酚酸类	Phenolic acids	酚酸类	13186-19-1	9	427560	9	3144300	1444800	2402900	1.03081	0.0383056	0.123695	16.3526	4.03145	up
Hmln000659	UPLC-MS/MS	C13H16O10	3-O-Galloyl-D-glucose	3-O-没食子酰-D-葡萄糖	Phenolic acids	酚酸类	Phenolic acids	酚酸类	-	9	9	9	2342300	1412500	3222900	1.32115	0.046971	0.136311	258433	17.9794	up
pmf0289	UPLC-MS/MS	C15H21N5O4	Riboprine	利波腺苷	Phenolic acids	酚酸类	Phenolic acids	酚酸类	7724-76-7	126810	77352	98445	78148	30892	24100	1.02157	0.0656695	0.160523	0.439977	-1.1845	down
pmn001421	UPLC-MS/MS	C16H18O8	3-O-p-Coumaroylquinic acid	3-O-对香豆酰奎宁酸	Phenolic acids	酚酸类	Phenolic acids	酚酸类	87099-71-6	1720200	2335100	9791800	311430	153700	462660	1.18193	0.238673	0.357407	0.0670025	-3.89964	down
MWSmce310	UPLC-MS/MS	C21H22O4	Bergamottin	佛手柑素	Lignans and Coumarins	木脂素和香豆素	Coumarins	香豆素	7380-40-7	18046	39472	14371	6105.7	5532.6	10550	1.10378	0.163986	0.282887	0.308647	-1.69597	down
Hmjp006104	UPLC-MS/MS	C19H21NO5	N-Cis-Feruloyl-3'-O-methyldopamine	N-顺式阿魏酰基-3'-O-甲基多巴胺	Alkaloids	生物碱	Phenolamine	酚胺	-	9668200	7248100	4294600	23774	21364	26423	1.31753	0.0453407	0.134438	0.00337378	-8.21142	down
mws1474	UPLC-MS/MS	C18H16O7	5,7-Dihydroxy-3',4',5'-trimethoxyflavone	5,7-二羟基-3',4',5'-三甲氧基黄酮	Flavonoids	黄酮	Flavones	黄酮	18103-42-9	15544	9	9	568450	99709	231610	1.09937	0.168917	0.288323	57.8183	5.85346	up
pmp000786	UPLC-MS/MS	C18H16O7	Eupatorin; 3',5-Dihydroxy-4',6,7-Trimethoxyflavone	泽兰黄素; 3',5-二羟基-4',6,7-三甲氧基黄酮	Flavonoids	黄酮	Flavones	黄酮	855-96-9	8227.8	9	9	151800	29794	67474	1.07943	0.155229	0.271303	30.2054	4.91674	up
pmb0801	UPLC-MS/MS	C14H19NO9	4-Pyridoxic acid-O-glucoside	4-吡哆酸-O-葡萄糖苷	Others	其它类	Vitamin	维生素	-	39921	37439	28669	56294	130560	59402	1.0578	0.191698	0.308124	2.32253	1.2157	up
mws1629	UPLC-MS/MS	C15H22O9	Aucubin	桃叶珊瑚苷	Terpenoids	萜类	Sesquiterpenoids	倍半萜	479-98-1	9	9	9	45828	37029	26393	1.32135	0.0229989	0.108423	4046.3	11.9824	up
Cmrn003066	UPLC-MS/MS	C16H26O8	Kankanoside P	甘蓝苷 P	Terpenoids	萜类	Monoterpenoids	倍萜	-	9	9	9	70518	85981	59466	1.32189	0.0112206	0.0986287	7998.7	12.9656	up
Cmrn002988	UPLC-MS/MS	C16H26O8	Kankanoside A	甘蓝苷 A	Terpenoids	萜类	Monoterpenoids	倍萜	-	24390	24738	18871	1176.6	4647	3001	1.23638	0.00261557	0.0785734	0.129775	-2.94591	down
Lmhp011562	UPLC-MS/MS	C21H36O4	1-α-Linolenoyl-glycerol	1-α-亚麻酸甘油酯	Lipids	脂质	Glycerol ester	甘油酯	-	60661	64615	34050	1205300	1568000	530880	1.28096	0.0745832	0.173663	20.7385	4.37424	up
Lmhp011388	UPLC-MS/MS	C21H36O4	2-α-Linolenoyl-glycerol	2-α-亚麻酸甘油酯	Lipids	脂质	Glycerol ester	甘油酯	55268-58-1	32422	40002	19683	1331600	1261100	611440	1.30098	0.0454299	0.134479	34.7871	5.12048	up
Lmhp012042	UPLC-MS/MS	C21H38O4	2-Linoleoylglycerol	2-亚油酰甘油酯	Lipids	脂质	Glycerol ester	甘油酯	3443-82-1	198990	181390	186160	502580	359790	337870	1.25079	0.0535267	0.14456	2.11854	1.08307	up
Lmhp112042	UPLC-MS/MS	C21H38O4	1-Linoleoylglycerol	1-亚油酰甘油酯	Lipids	脂质	Glycerol ester	甘油酯	2277-28-3	51729	38069	56529	251430	210850	152020	1.27709	0.028887	0.111998	4.19813	2.06975	up
Lmcp005293	UPLC-MS/MS	C20H20O6	6,7-Dimethoxy-2-[2-(3'-Hydroxy-4'-Methoxyphenyl)Ethyl]Chromone	6,7-二甲氧基-2-[2-(3-羟基-4-甲氧基)苯乙基]色酮	Others	其它类	Others	其它	-	15118000	19097000	31958000	3034700	666010	4463000	1.16464	0.0567579	0.148303	0.123369	-3.01895	down
pmb0296	UPLC-MS/MS	C21H40O4	1-Oleoyl-Sn-Glycerol	单酰甘油酯(18:1)	Lipids	脂质	Glycerol ester	甘油酯	129784-87-8	40904	32872	57072	298310	217260	244690	1.29372	0.00820658	0.092265	5.81025	2.5386	up
Zmhn003082	UPLC-MS/MS	C15H18O10	5-O-Galloyl-methyl quinine ester	5-O-没食子酰-奎宁酸甲酯	Phenolic acids	酚酸类	Phenolic acids	酚酸类	-	9	9	9	305540	244100	176610	1.32167	0.0228487	0.108288	26898.1	14.7152	up
pmb3107	UPLC-MS/MS	C15H20O10	Glucosyringic Acid	葡萄糖基丁香酸	Phenolic acids	酚酸类	Phenolic acids	酚酸类	-	171080	197720	287870	4678500	3881100	4386600	1.31458	0.00268966	0.0785734	19.7149	4.30122	up
pmb0752	UPLC-MS/MS	C17H20O9	3-O-Feruloylquinic acid*	3-O-阿魏酰奎宁酸*	Phenolic acids	酚酸类	Phenolic acids	酚酸类	1899-29-2	431770	382150	625000	2710100	1829300	3607300	1.27009	0.0462969	0.13618	5.66168	2.50123	up
Lmbp002309	UPLC-MS/MS	C17H22O9	Sinapaldehyde-4-O-Glucoside	芥子醛-4-O-葡萄糖苷	Phenolic acids	酚酸类	Phenolic acids	酚酸类	154461-65-1	2966.3	9461.8	14544	31196	38461	47348	1.13898	0.00836966	0.092265	4.338	2.11703	up
mws1574	UPLC-MS/MS	C16H22O10	Geniposidic acid	京尼平苷酸	Terpenoids	萜类	Monoterpenoids	倍萜	27741-01-1	138730	339860	104090	9	9	9	1.31818	0.11833	0.228704	4.63376e-05	-14.3975	down
Lmdn001501	UPLC-MS/MS	C16H22O10	Gardoside	栀子新苷	Terpenoids	萜类	Monoterpenoids	倍萜	54835-76-6	135140	314230	87940	9	9	9	1.31778	0.121661	0.232995	5.02503e-05	-14.2805	down
Hmlp002744	UPLC-MS/MS	C20H22O7	Nortrachelogenin	去甲络石苷元	Lignans and Coumarins	木脂素和香豆素	Lignans	木脂素	34444-37-6	580040	1103600	1660100	187140	48771	293000	1.12237	0.0883427	0.194594	0.158179	-2.66037	down
mws0232	UPLC-MS/MS	C17H20N4O6	Riboflavin (Vitamin B2)	核黄素 (维生素 B2)	Others	其它类	Vitamin	维生素	83-88-5	2206400	2054900	2668300	779020	1227900	871640	1.24729	0.00536804	0.0909479	0.415401	-1.26742	down
Hmap007816	UPLC-MS/MS	C24H30O4	Feselol	Feselol	Lignans and Coumarins	木脂素和香豆素	Coumarins	香豆素	51020-36-1	140540	232930	150320	9	9	9	1.32121	0.0270335	0.111998	5.15474e-05	-14.2437	down
Zmcp102801	UPLC-MS/MS	C17H20O10	Saikochromoside A	柴胡色原酮苷A	Others	其它类	Others	其它	-	18436000	26718000	15541000	17864	4614	11627	1.31347	0.0263539	0.111998	0.000561908	-10.7974	down
Zmcp001750	UPLC-MS/MS	C17H20O10	Eleutheroside B1	刺五加苷 B1	Lignans and Coumarins	木脂素和香豆素	Coumarins	香豆素	16845-16-2	5167900	13734000	8237000	9	11210	15355	1.15897	0.0690093	0.165468	0.000979185	-9.99613	down
Lmbp003208	UPLC-MS/MS	C17H20O10	Fraxidin-8-O-glucoside	秦皮啶-8-O-葡萄糖苷	Lignans and Coumarins	木脂素和香豆素	Coumarins	香豆素	-	4971400	12231000	7521200	11208	10676	3998.4	1.31119	0.0607009	0.154527	0.00104687	-9.8997	down
Cmdp003280	UPLC-MS/MS	C17H24O10	7-Dehydroxyzaluzioside	7-Dehydroxyzaluzioside	Terpenoids	萜类	Monoterpenoids	倍萜	-	718520	290990	570930	1958100	1001700	1357100	1.10742	0.0645491	0.159096	2.73145	1.44967	up
Lmzn001582	UPLC-MS/MS	C18H28O9	5'-Glucosyloxyjasmanic acid	5'-葡萄糖基氧代茉莉酸	Phenolic acids	酚酸类	Phenolic acids	酚酸类	-	553860	369930	1955500	199000	200900	284440	1.00121	0.281226	0.402154	0.237677	-2.07293	down
pmb0489	UPLC-MS/MS	C19H28N2O7	N-Glucosyl-p-coumaroylputrescine	N-葡萄糖基对香豆酰腐胺	Alkaloids	生物碱	Phenolamine	酚胺	-	10500	15675	9015.9	34023	20465	26235	1.17246	0.041613	0.128073	2.29386	1.19778	up
pme2735	UPLC-MS/MS	C15H22N6O5S	S-Adenosyl-L-methionine	S-腺苷-L-蛋氨酸	Amino acids and derivatives	氨基酸及其衍生物	Amino acids and derivatives	氨基酸及其衍生物	29908-03-0	281990	250940	111990	55639	50551	53106	1.21009	0.0902295	0.197074	0.247001	-2.01741	down
Cmbp005948	UPLC-MS/MS	C21H20O8	1-O-p-Hydroxycinnamoyl-3-O-caffeoylglycerol	1-O-对羟基肉桂酰基-3-O-咖啡酰甘油	Phenolic acids	酚酸类	Phenolic acids	酚酸类	-	97262	185000	64549	286080	298340	299150	1.13943	0.0365232	0.1212	2.5477	1.34919	up
Hmln003529	UPLC-MS/MS	C18H26O10	Benzyl β-primeveroside	苯甲酰樱草糖苷	Phenolic acids	酚酸类	Phenolic acids	酚酸类	130622-31-0	128170	56682	102420	1119.8	9	9	1.21549	0.0447902	0.133472	0.00396071	-7.98003	down
Cmjn004337	UPLC-MS/MS	C18H26O10	Benzyl-(2''-O-xylosyl)glucoside	苄基-(2''-O-木糖基)葡萄糖苷	Phenolic acids	酚酸类	Phenolic acids	酚酸类	-	810270	582140	587490	59710	100170	60170	1.30133	0.0138395	0.0986287	0.111142	-3.16952	down
mws0071	UPLC-MS/MS	C21H20O9	Apigenin-4'-O-rhamnoside	芹菜素-4'-O-鼠李糖苷	Flavonoids	黄酮	Flavones	黄酮	133538-77-9	42080	41313	33924	9	9	9	1.32203	0.0043943	0.0864396	0.000230146	-12.0852	down
Lmbp003668	UPLC-MS/MS	C20H18O10	Kaempferol-3-O-arabinoside	山奈酚-3-O-阿拉伯糖苷	Flavonoids	黄酮	Flavonols	黄酮醇	-	2404000	4211100	5641200	9	9	9	1.32099	0.0487473	0.138766	2.20295e-06	-18.7921	down
Zmbp003590	UPLC-MS/MS	C20H24O10	Rutarin	Rutarin	Lignans and Coumarins	木脂素和香豆素	Coumarins	香豆素	20320-81-4	278420	349020	139400	71275	36514	36571	1.21341	0.0732101	0.171658	0.188253	-2.40925	down
pmb0864	UPLC-MS/MS	C19H40NO7P	LysoPE 14:0	溶血磷脂酰乙醇胺 14:0	Lipids	脂质	LPE	溶血磷脂酰乙醇胺	-	4417	6426.1	5712.2	11647	17708	8138.2	1.11561	0.124336	0.23548	2.26472	1.17934	up
MWSHY0181	UPLC-MS/MS	C21H20O10	Apigenin-8-C-Glucoside (Vitexin)	芹菜素-8-C-葡萄糖苷 (牡荆素)	Flavonoids	黄酮	Flavones	黄酮	3681-93-4	613830	494970	142140	1204100	1206800	2130400	1.08535	0.0528115	0.143461	3.63031	1.86009	up
MWSHY0008	UPLC-MS/MS	C21H20O10	Isovitexin	异维新	Flavonoids	黄酮	Flavones	黄酮	38953-85-4	634460	764980	318210	1501400	1499600	2797000	1.16019	0.0769804	0.178155	3.37554	1.75512	up
pme0321	UPLC-MS/MS	C21H20O10	Kaempferol-7-O-rhamnoside	山奈酚-7-O-鼠李糖苷	Flavonoids	黄酮	Flavonols	黄酮醇	20196-89-8	11114000	11826000	5464800	9	9	9	1.32131	0.042321	0.129137	9.50544e-07	-20.0047	down
pmp000413	UPLC-MS/MS	C21H20O10	Genistein-8-C-glucoside	染料木素-8-C-葡萄糖苷	Flavonoids	黄酮	Isoflavones	异黄酮	66026-80-0	633770	1030500	330910	1728100	1436200	2976500	1.09931	0.0830785	0.187569	3.07782	1.62191	up
mws0919	UPLC-MS/MS	C21H20O10	Kaempferol-3-O-rhamnoside (Afzelin)(Kaempferin)	山奈酚-3-O-鼠李糖苷 (阿福豆苷)(番泻叶山奈苷)	Flavonoids	黄酮	Flavonols	黄酮醇	482-39-3	6522900	6751900	8792000	96603	55984	114680	1.31497	0.00967628	0.0967806	0.0121117	-6.36745	down
Lmfn004036	UPLC-MS/MS	C20H18O11	Morin-3-O-lyxoside	桑色素-3-O-来苏糖苷	Flavonoids	黄酮	Flavonols	黄酮醇	-	30830000	38417000	23996000	1406300	2173900	1506400	1.31034	0.0192209	0.100137	0.0545521	-4.19622	down
mws4183	UPLC-MS/MS	C20H18O11	Quercetin-3-O-arabinoside (Guaijaverin)	槲皮素-3-O-阿拉伯糖苷(番石榴苷)	Flavonoids	黄酮	Flavonols	黄酮醇	22255-13-6	23652000	35297000	27355000	223740	725650	446620	1.30294	0.0142863	0.0986287	0.0161755	-5.95005	down
Lmfn004065	UPLC-MS/MS	C20H18O11	Morin-3-O-arabinoside	桑色素-3-O-阿拉伯糖苷	Flavonoids	黄酮	Flavonols	黄酮醇	-	18624000	35792000	26314000	1472900	2637900	1705100	1.2961	0.036736	0.121229	0.0720414	-3.79503	down
mws2186	UPLC-MS/MS	C20H18O11	Avicularin(Quercetin-3-O-α-L-arabinofuranoside)	扁蓄苷(广寄生苷)	Flavonoids	黄酮	Flavonols	黄酮醇	572-30-5	45359000	69846000	45521000	3335100	4744600	4015700	1.30912	0.0256746	0.111998	0.0752548	-3.73207	down
Lman003972	UPLC-MS/MS	C21H22O10	6-O-Caffeoylarbutin	6-O-咖啡酰熊果苷	Phenolic acids	酚酸类	Phenolic acids	酚酸类	136172-60-6	436900	558390	250550	9	9	57718	1.05695	0.0422025	0.129137	0.046343	-4.4315	down
Lmhp008440	UPLC-MS/MS	C20H40NO7P	LysoPE 15:1	溶血磷脂酰乙醇胺 15:1	Lipids	脂质	LPE	溶血磷脂酰乙醇胺	-	2129.4	1926.2	2560.6	11915	15476	5346.3	1.21247	0.0985581	0.206895	4.94805	2.30686	up
Hmcp002316	UPLC-MS/MS	C21H20O11	Isorhamnetin-3-O-arabinoside	异鼠李素-3-O-阿拉伯糖苷	Flavonoids	黄酮	Flavonols	黄酮醇	-	178030	1466500	116140	2162200	5113100	2943900	1.08381	0.0663045	0.160755	5.80415	2.53709	up
mws0913	UPLC-MS/MS	C21H20O11	Kaempferol-3-O-galactoside (Trifolin)	山奈酚-3-O-半乳糖苷(三叶豆苷)	Flavonoids	黄酮	Flavonols	黄酮醇	23627-87-4	699800	2473500	1029000	300860	212840	455320	1.11342	0.184586	0.302606	0.230593	-2.11658	down
pmn001716	UPLC-MS/MS	C21H20O11	Carthamone	醌式红花苷	Flavonoids	黄酮	Chalcones	查耳酮	86579-00-2	483430	1822300	789860	251200	269960	436140	1.02433	0.218605	0.337839	0.309246	-1.69317	down
pmn001415	UPLC-MS/MS	C24H20O9	Catechin-(7,8-bc)-4β-(3,4-dihydroxyphenyl)-dihydro-2-(3H)-one	儿茶素-(7,8-bc)-4β-(3,4-二羟基苯基)-二氢-2-(3h)-酮	Flavonoids	黄酮	Flavanols	黄烷醇类	-	354980	206380	85712	9	9	9	1.3179	0.109378	0.218021	4.17264e-05	-14.5487	down
pmd0160	UPLC-MS/MS	C21H44NO7P	LysoPE 16:0(2n isomer)	溶血磷脂酰乙醇胺 16:0(2n异构)	Lipids	脂质	LPE	溶血磷脂酰乙醇胺	-	217030	196470	168420	418540	807430	269510	1.04687	0.197119	0.313072	2.56991	1.36172	up
Lmdn006811	UPLC-MS/MS	C30H48O3	Soyasapogenol E	大豆皂醇 E	Terpenoids	萜类	Triterpene	三萜	6750-59-0	5272.9	4915.6	5526.9	63036	51131	63397	1.3192	0.00546096	0.0909479	11.2987	3.49809	up
pmn001700	UPLC-MS/MS	C30H48O3	24,30-Dihydroxy-12(13)-enolupinol	24,30-二羟基-12(13)烯羽扇豆醇	Terpenoids	萜类	Triterpene	三萜	-	3403.3	7248	5631.5	62683	42717	37362	1.28599	0.0296494	0.113014	8.76766	3.13219	up
pmb0464	UPLC-MS/MS	C16H27NO14	L-Aspartic acid-O-diglucoside	L-天冬氨酸-O-二葡萄糖苷	Amino acids and derivatives	氨基酸及其衍生物	Amino acids and derivatives	氨基酸及其衍生物	-	26602	36920	18162	76492	60870	59622	1.19423	0.00744355	0.092265	2.41154	1.26995	up
mws4167	UPLC-MS/MS	C21H18O12	Luteolin-7-O-glucuronide	木犀草素-7-O-葡萄糖醛酸苷	Flavonoids	黄酮	Flavones	黄酮	29741-10-4	31258	55354	39948	35903000	42922000	37382000	1.32101	0.00303401	0.0806957	918.197	9.84266	up
Lmzn001894	UPLC-MS/MS	C21H18O12	Kaempferol-3-O-glucuronide	山奈酚-3-O-葡萄糖醛酸苷	Flavonoids	黄酮	Flavonols	黄酮醇	22688-78-4	9	9	9	21745000	25211000	22864000	1.32219	0.00192003	0.0714409	2.58593e+06	21.3022	up
MWSHY0035	UPLC-MS/MS	C21H18O12	Scutellarein-7-O-glucuronide (Scutellarin)	野黄芩素-7-O-葡萄糖醛酸苷 (野黄芩苷)	Flavonoids	黄酮	Flavones	黄酮	27740-01-8	40769	61079	33284	34817000	40822000	32743000	1.32052	0.00447685	0.0867146	802.045	9.64754	up
Lmdp003171	UPLC-MS/MS	C22H22O11	Azalein (Azaleatin-3-O-rhamnoside)	杜鹃黄苷	Flavonoids	黄酮	Flavonols	黄酮醇	29028-02-2	610520	13119000	1778700	9	9	9	1.30728	0.32441	0.447098	1.74101e-06	-19.1316	down
pmp000579	UPLC-MS/MS	C22H22O11	Diosmetin-7-O-galactoside	香叶木素-7-O-半乳糖苷	Flavonoids	黄酮	Flavones	黄酮	-	48972	263290	59206	3075300	3003900	3818400	1.26904	0.00428589	0.0864396	26.6446	4.73577	up
Lmjp003655	UPLC-MS/MS	C22H22O11	6-C-MethylKaempferol-3-glucoside	6-甲基山奈酚-3-O-葡萄糖苷	Flavonoids	黄酮	Flavones	黄酮	-	40933	211070	45230	3415100	3672900	3132500	1.27665	0.000792316	0.0585686	34.3855	5.10373	up
Hmmp004965	UPLC-MS/MS	C22H22O11	Diosmetin-7-O-glucoside	香叶木素-7-O-葡萄糖苷	Flavonoids	黄酮	Flavones	黄酮	20126-59-4	41972	260670	72446	3216500	2890100	3263500	1.26645	0.000127315	0.0354741	24.9811	4.64276	up
Hmgp002189	UPLC-MS/MS	C22H22O11	Hispidulin-7-O-Glucoside	高车前素-7-O-葡萄糖苷	Flavonoids	黄酮	Flavones	黄酮	17680-84-1	38906	179900	46452	3160400	3046000	3210500	1.28413	1.43533e-06	0.00255776	35.5009	5.14978	up
Lmdp003286	UPLC-MS/MS	C21H20O12	Isohyperoside	异金丝桃苷	Flavonoids	黄酮	Flavonols	黄酮醇	35589-21-0	1446100	2301200	374890	13654000	13656000	12644000	1.21459	0.000199069	0.0354741	9.69242	3.27686	up
Smgp004575	UPLC-MS/MS	C21H20O12	Quercetin-5-O-β-D-glucoside	槲皮素-5-O-β-D-葡萄糖苷	Flavonoids	黄酮	Flavonols	黄酮醇	-	1317400	2451700	386490	11383000	13060000	11968000	1.20758	0.00019441	0.0354741	8.76193	3.13125	up
Zmhn002545	UPLC-MS/MS	C22H24O11	4-O-(6'-O-Glucosylcaffeoyl)-3,4-dihydroxybenzyl alcohol	4-O-(6'-O-葡萄糖基咖啡酰)-3,4-二羟基苄醇	Phenolic acids	酚酸类	Phenolic acids	酚酸类	-	221810	407120	117730	9	9	9	1.31849	0.0987922	0.206895	3.6161e-05	-14.7552	down
HJAP154	UPLC-MS/MS	C23H16O11	Galloylisorhamnetin	没食子酰异鼠李素	Flavonoids	黄酮	Flavonols	黄酮醇	-	40523	80460	149130	17220	6646	18148	1.15812	0.136889	0.251038	0.155542	-2.68462	down
Hmmp002121	UPLC-MS/MS	C23H16O11	Isorhamnetin-3-O-gallate	异鼠李素-3-O-没食子酸酯	Flavonoids	黄酮	Flavonols	黄酮醇	-	80688	40017	165090	29088	16065	8982.5	1.1057	0.168053	0.2874	0.189421	-2.40033	down
pmn001704	UPLC-MS/MS	C30H46O4	2,3-Dihydroxy-5(6),12(13)-diene-ursolic acid	2,3-二羟基-5(6),12(13)-二烯熊果酸	Terpenoids	萜类	Triterpene	三萜	-	9	9	3202	10273	45311	20713	1.08781	0.142242	0.257311	23.6947	4.56649	up
Lmsn012627	UPLC-MS/MS	C30H46O4	2α,3α-Dihydroxyurs-12,18-dien-28-oic acid	2α,3α-二羟基熊果-12,18-二烯-28-酸	Terpenoids	萜类	Triterpene	三萜	-	9	9	3571.2	12293	52661	21210	1.08672	0.152333	0.269571	24.0065	4.58535	up
Hmbn005207	UPLC-MS/MS	C30H48O4	hederagenin	常春藤皂苷元	Terpenoids	萜类	Triterpene Saponin	三萜皂苷	465-99-6	1897000	343080	749300	9	9	111190	1.04965	0.174568	0.294304	0.037201	-4.74851	down
MWSmce560	UPLC-MS/MS	C30H48O4	23-Hydroxybetulinic acid	23-羟基白桦脂酸	Terpenoids	萜类	Triterpene	三萜	85999-40-2	9	2133.4	9	6929.4	5102.3	5260.7	1.04414	0.0059146	0.092265	8.03774	3.00679	up
Smpn011792	UPLC-MS/MS	C30H48O4	2,3-dihydroxy-12-ursen-28-oic acid	2,3-二羟基-12-熊果烯-28-酸	Terpenoids	萜类	Triterpene	三萜	-	9	9	9	29006	572980	127730	1.3011	0.283221	0.403137	27026.5	14.7221	up
Lmgp002501	UPLC-MS/MS	C20H27NO12	Dhurrin-6'-O-Glucoside	蜀黍苷-6'-O-葡萄糖苷	Flavonoids	黄酮	Flavones	黄酮	-	35428	12592	35094	266580	43866	348580	1.0323	0.16863	0.28811	7.92918	2.98717	up
pmb1912	UPLC-MS/MS	C20H23N7O7	10-Formyltetrahydrofolic Acid	10-甲酰四氢叶酸	Alkaloids	生物碱	Alkaloids	生物碱	2800-34-2	125000	138840	159840	477180	185710	265640	1.03534	0.191123	0.307661	2.19158	1.13197	up
mws1714	UPLC-MS/MS	C22H18O12	Chicoric Acid	菊苣酸	Phenolic acids	酚酸类	Phenolic acids	酚酸类	70831-56-0	47302	106480	90065	9	9	9	1.31972	0.0440148	0.13294	0.000110725	-13.1407	down
Lmhp008801	UPLC-MS/MS	C23H42NO7P	LysoPE 18:3	溶血磷脂酰乙醇胺 18:3	Lipids	脂质	LPE	溶血磷脂酰乙醇胺	-	310590	479770	133170	956730	1056600	840640	1.13105	0.00900633	0.0963146	3.09028	1.62774	up
Lmhp008589	UPLC-MS/MS	C23H42NO7P	LysoPE 18:3(2n isomer)	溶血磷脂酰乙醇胺 18:3(2n异构)	Lipids	脂质	LPE	溶血磷脂酰乙醇胺	-	278240	479100	139400	810000	1046800	861770	1.13778	0.00958354	0.0967806	3.03161	1.60009	up
pmb0874	UPLC-MS/MS	C23H44NO7P	LysoPE 18:2(2n isomer)	溶血磷脂酰乙醇胺 18:2(2n异构)	Lipids	脂质	LPE	溶血磷脂酰乙醇胺	-	1143600	1561400	952360	4912000	4692200	3907400	1.28684	0.00192433	0.0714409	3.69436	1.88532	up
pmb0881	UPLC-MS/MS	C23H44NO7P	LysoPE 18:2	溶血磷脂酰乙醇胺 18:2	Lipids	脂质	LPE	溶血磷脂酰乙醇胺	-	1121500	1524200	827810	4602800	4729600	3817500	1.27569	0.00123954	0.0585686	3.78577	1.92059	up
Zmhn004909	UPLC-MS/MS	C21H18O13	3,4-Digalloylshikimic acid	3,4-二没食子酰莽草酸	Phenolic acids	酚酸类	Phenolic acids	酚酸类	-	9	9	9	254210	218490	157060	1.32178	0.0177808	0.0992405	23324.4	14.5096	up
Hmjp003123	UPLC-MS/MS	C21H18O13	Quercetin-5-O-glucuronide	槲皮素-5-O-葡萄糖醛酸苷	Flavonoids	黄酮	Flavonols	黄酮醇	-	3518.8	9	4286.2	1435900	15247000	18531000	1.19907	0.154355	0.270729	4506.51	12.1378	up
Lmfn003760	UPLC-MS/MS	C21H18O13	Quercetin-4'-O-glucuronide	槲皮素-4'-O-葡萄糖醛酸苷	Flavonoids	黄酮	Flavonols	黄酮醇	201463-36-7	9	9	9	8227200	9373000	7302000	1.32216	0.00516667	0.0909479	922304	19.8149	up
Hmcp002207	UPLC-MS/MS	C22H22O12	Isorhamnetin-7-O-glucoside (Brassicin)	异鼠李素-7-O-葡萄糖苷 (蔓菁苷)	Flavonoids	黄酮	Flavonols	黄酮醇	6743-96-0	78813	1586500	168950	8182700	6556400	6272500	1.15822	0.00134841	0.0585686	11.4551	3.51791	up
Lmjp003044	UPLC-MS/MS	C22H22O12	Isorhamnetin-3-O-Glucoside	异鼠李素-3-O-葡萄糖苷	Flavonoids	黄酮	Flavonols	黄酮醇	5041-82-7	102530	1778500	179780	7511500	8075100	6932600	1.16136	0.0011531	0.0585686	10.9274	3.44987	up
Lmjp002906	UPLC-MS/MS	C22H22O12	Rhamnetin-3-O-Glucoside	鼠李素-3-O-葡萄糖苷	Flavonoids	黄酮	Flavonols	黄酮醇	27875-34-9	102660	1770200	165030	7983000	7624600	6796000	1.16089	0.00103332	0.0585686	10.9935	3.45858	up
Hmgp002148	UPLC-MS/MS	C22H22O12	Nepetin-7-O-alloside	泽兰黄酮-7-O-阿洛糖苷	Flavonoids	黄酮	Flavones	黄酮	-	77384	1696100	153530	7628000	7407700	7061900	1.1548	0.00333311	0.0838222	11.4673	3.51945	up
Lmnn002886	UPLC-MS/MS	C23H26O11	1'-O-(3,4-Dihydroxyphenethyl)-O-caffeoyl-glucoside	1'-O-(3,4-二羟基苯乙基)-O-咖啡酰基-葡萄糖苷	Phenolic acids	酚酸类	Phenolic acids	酚酸类	-	9	9	9	43721000	44089000	56655000	1.3221	0.00770416	0.092265	5.35056e+06	22.3513	up
mws1454	UPLC-MS/MS	C23H26O11	Persicoside	桃苷	Flavonoids	黄酮	Flavanones	二氢黄酮	28978-03-2	56632	95291	45022	14117	9	9	1.04541	0.0466551	0.136311	0.0717713	-3.80045	down
Lmpp003296	UPLC-MS/MS	C21H19O13+	Delphinidin-3-O-glucuronide	飞燕草素-3-O-葡萄糖醛酸苷	Flavonoids	黄酮	Anthocyanidins	花青素	-	891.75	1673.9	1720.5	16536000	11858000	18494000	1.32061	0.0154991	0.0986287	10939.4	13.4172	up
pmb2260	UPLC-MS/MS	C23H46NO7P	LysoPC 15:1	溶血磷脂酰胆碱 15:1	Lipids	脂质	LPC	溶血磷脂酰胆碱	-	4888.7	26820	9821.7	41110	36409	28667	1.00728	0.0628799	0.157224	2.55683	1.35435	up
pmb0856	UPLC-MS/MS	C23H46NO7P	LysoPE 18:1(2n isomer)	溶血磷脂酰乙醇胺 18:1(2n异构)	Lipids	脂质	LPE	溶血磷脂酰乙醇胺	-	29689	30854	13706	149750	140970	102470	1.25371	0.0103104	0.0967806	5.29556	2.40478	up
mws0289	UPLC-MS/MS	C23H46NO7P	LysoPE 18:1	溶血磷脂酰乙醇胺 18:1	Lipids	脂质	LPE	溶血磷脂酰乙醇胺	89576-29-4	73822	62258	37247	308100	247210	171550	1.24037	0.0352438	0.119841	4.19358	2.06818	up
pmb0883	UPLC-MS/MS	C23H48NO7P	LysoPE 18:0	溶血磷脂酰乙醇胺 18:0	Lipids	脂质	LPE	溶血磷脂酰乙醇胺	69747-55-3	18537	18388	13388	54632	77739	35228	1.21362	0.0835407	0.187967	3.33113	1.73601	up
Li512114	UPLC-MS/MS	C31H50O4	Corosolic Acid Methyl Ester	科罗索酸甲酯	Terpenoids	萜类	Triterpene	三萜	4518-70-1	2334.2	679.64	1455.8	27482	123160	79348	1.26619	0.112818	0.222885	51.456	5.68527	up
Lmmn003398	UPLC-MS/MS	C23H22O12	Kaempferol-3-O-(6''-acetyl)glucoside	山奈酚-3-O-(6''-O-乙酰)葡萄糖苷	Flavonoids	黄酮	Flavonols	黄酮醇	-	684860	627240	557210	1868500	2491600	756750	1.02785	0.165825	0.284337	2.73729	1.45275	up
pmp001142	UPLC-MS/MS	C24H29NO10	Cimicifugamide A	升麻酰胺 A	Alkaloids	生物碱	Phenolamine	酚胺	-	91726	159250	192980	10755	4434.1	4195	1.28507	0.0408755	0.127016	0.0436622	-4.51747	down
pma1303	UPLC-MS/MS	C24H46NO7P	LysoPC 16:2	溶血磷脂酰胆碱 16:2	Lipids	脂质	LPC	溶血磷脂酰胆碱	-	46598	65564	29989	121510	120360	134500	1.20837	0.00805234	0.092265	2.64768	1.40473	up
pmb0863	UPLC-MS/MS	C24H46NO7P	LysoPC 16:2(2n isomer)	溶血磷脂酰胆碱 16:2(2n异构)	Lipids	脂质	LPC	溶血磷脂酰胆碱	-	38850	63218	32051	106490	130950	136430	1.22691	0.00376516	0.0841302	2.7876	1.47902	up
pmp001164	UPLC-MS/MS	C23H24O12	Iristectorin B	鸢尾新苷	Flavonoids	黄酮	Isoflavones	异黄酮	94396-09-5	9	9	9	558790	606150	536600	1.3222	0.00130524	0.0585686	63020	15.9435	up
pmp001270	UPLC-MS/MS	C24H48NO7P	LysoPC 16:1	溶血磷脂酰胆碱 16:1	Lipids	脂质	LPC	溶血磷脂酰胆碱	76790-27-7	87208	199290	63266	345710	248240	406730	1.11493	0.0257337	0.111998	2.86101	1.51653	up
Lmsn004321	UPLC-MS/MS	C22H22O13	1-O-Caffeoyl-3-O-galloyl-β-D-glucose	1-O-咖啡酰-3-O-没食子酰-β-D-葡萄糖	Phenolic acids	酚酸类	Phenolic acids	酚酸类	-	9	9	9	59552	52378	130550	1.31937	0.0835254	0.187967	8980.74	13.1326	up
pmb0855	UPLC-MS/MS	C24H50NO7P	LysoPC 16:0	溶血磷脂酰胆碱 16:0	Lipids	脂质	LPC	溶血磷脂酰胆碱	17364-16-8	3878100	7385400	2635600	8650600	10899000	8571300	1.04375	0.0590992	0.1523	2.02322	1.01665	up
pmd0132	UPLC-MS/MS	C24H50NO7P	LysoPC 16:0(2n isomer)	溶血磷脂酰胆碱 16:0(2n异构)	Lipids	脂质	LPC	溶血磷脂酰胆碱	-	865080	1232000	746910	1976500	2600700	2125600	1.23478	0.00674453	0.092265	2.35683	1.23685	up
pmb3000	UPLC-MS/MS	C24H24O12	Chrysoeriol-7-O-(6''-acetyl)glucoside	金圣草黄素-7-O-(6''-乙酰)葡萄糖苷	Flavonoids	黄酮	Flavones	黄酮	-	91442	63654	69506	221410	167250	114860	1.15319	0.0850814	0.190471	2.24183	1.16468	up
Lmsn002288	UPLC-MS/MS	C21H28O14	1-O-Caffeoyl-(6-O-glucosyl)-β-D-glucose	1-O-咖啡酰-6-O-葡萄糖基-β-D-葡萄糖	Phenolic acids	酚酸类	Phenolic acids	酚酸类	-	3653600	4150200	6777300	1256500	1475800	948550	1.25222	0.0610615	0.155008	0.25244	-1.98599	down
pmp001141	UPLC-MS/MS	C25H31NO10	Cimicifugamide	升麻酰胺	Alkaloids	生物碱	Phenolamine	酚胺	-	112470	17231	24426	454890	425880	438050	1.19653	0.00383994	0.0844787	8.55671	3.09706	up
Lmhp010514	UPLC-MS/MS	C25H48NO7P	LysoPE 20:2(2n isomer)	溶血磷脂酰乙醇胺 20:2(2n异构)	Lipids	脂质	LPE	溶血磷脂酰乙醇胺	-	14196	23574	14075	35833	44628	35117	1.2082	0.00840554	0.092265	2.2293	1.15659	up
Lmhp010757	UPLC-MS/MS	C25H48NO7P	LysoPE 20:2	溶血磷脂酰乙醇胺 20:2	Lipids	脂质	LPE	溶血磷脂酰乙醇胺	-	14514	24885	14640	30996	49347	38197	1.15816	0.0352324	0.119841	2.1936	1.1333	up
Lmhp009590	UPLC-MS/MS	C25H50NO7P	LysoPC 17:1	溶血磷脂酰胆碱 17:1	Lipids	脂质	LPC	溶血磷脂酰胆碱	-	43013	56980	25112	200770	139240	177100	1.24541	0.00752225	0.092265	4.13341	2.04733	up
pmb2406	UPLC-MS/MS	C25H52NO7P	LysoPC 17:0	溶血磷脂酰胆碱 17:0	Lipids	脂质	LPC	溶血磷脂酰胆碱	50930-23-9	15947	22290	14895	38606	53684	37990	1.24111	0.0231741	0.108961	2.45201	1.29396	up
Lmhp010515	UPLC-MS/MS	C25H52NO7P	LysoPC 17:0(2n isomer)	溶血磷脂酰胆碱 17:0(2n异构)	Lipids	脂质	LPC	溶血磷脂酰胆碱	-	27716	29692	20499	49144	59291	59653	1.25393	0.00287076	0.0800295	2.15755	1.10939	up
Lmhp009773	UPLC-MS/MS	C27H46O9	1-α-Linolenoyl-glycerol-3-O-glucoside	1-α-亚麻酸甘油酯-3-O-葡萄糖苷	Lipids	脂质	Glycerol ester	甘油酯	-	64243	69180	47405	340870	235400	238790	1.29136	0.0225317	0.107645	4.50738	2.17229	up
Lmhp010573	UPLC-MS/MS	C27H48O9	1-Linoleoylglycerol-3-O-glucoside	1-亚油酰甘油酯-3-O-葡萄糖苷	Lipids	脂质	Glycerol ester	甘油酯	-	2941.2	2230.9	5369	16793	14289	39746	1.20869	0.129378	0.241923	6.71922	2.74829	up
pmb0865	UPLC-MS/MS	C26H48NO7P	LysoPC 18:3(2n isomer)	溶血磷脂酰胆碱 18:3(2n异构)	Lipids	脂质	LPC	溶血磷脂酰胆碱	-	2660500	8534900	1391600	11201000	9675900	12456000	1.0089	0.0741426	0.172935	2.6482	1.40501	up
pmb0854	UPLC-MS/MS	C26H48NO7P	LysoPC 18:3	溶血磷脂酰胆碱 18:3	Lipids	脂质	LPC	溶血磷脂酰胆碱	-	3584800	7950000	1423900	10947000	9585300	12606000	1.00257	0.0548481	0.145445	2.55722	1.35458	up
pmp000531	UPLC-MS/MS	C26H30O11	Phellamurin	黄柏苷	Flavonoids	黄酮	Flavanonols	二氢黄酮醇	52589-11-4	246940	236740	230230	56462	123760	61602	1.21281	0.0148013	0.0986287	0.338732	-1.56178	down
pmp001273	UPLC-MS/MS	C26H50NO7P	LysoPC 18:2	溶血磷脂酰胆碱 18:2	Lipids	脂质	LPC	溶血磷脂酰胆碱	-	2128900	3697200	2150100	6341600	5990000	7961800	1.22168	0.00724639	0.092265	2.54424	1.34724	up
pmn001644	UPLC-MS/MS	C23H20O14	Quercetin-3-O-(2''-acetyl)glucuronide	槲皮素-3-O-(2''-乙酰)葡萄糖醛酸苷	Flavonoids	黄酮	Flavonols	黄酮醇	-	133110	280560	143720	382240	602050	954350	1.149	0.100273	0.208918	3.47807	1.79829	up
Li512111	UPLC-MS/MS	C24H24O13	Isorhamnetin-3-O-(6''-acetylglucoside)	异鼠李素-3-O-(6''-乙酰)葡萄糖苷	Flavonoids	黄酮	Flavonols	黄酮醇	-	310560	790150	459030	2874400	4056500	2847300	1.26548	0.0127759	0.0986287	6.26912	2.64826	up
pmn001378	UPLC-MS/MS	C26H32O11	Pinoresinol-4-O-glucoside	松脂醇-4-O-葡萄糖苷	Lignans and Coumarins	木脂素和香豆素	Lignans	木脂素	41607-20-9	3174100	2609600	2450600	963480	217690	519430	1.18134	0.00212195	0.0722192	0.206526	-2.2756	down
Lmhp010190	UPLC-MS/MS	C26H52NO7P	LysoPC 18:1(2n isomer)	溶血磷脂酰胆碱 18:1(2n异构)	Lipids	脂质	LPC	溶血磷脂酰胆碱	-	4322400	4151300	3498800	10616000	9850700	7988900	1.28385	0.0130255	0.0986287	2.37675	1.24899	up
pmp001281	UPLC-MS/MS	C26H52NO7P	LysoPC 18:1	溶血磷脂酰胆碱 18:1	Lipids	脂质	LPC	溶血磷脂酰胆碱	-	811520	997840	405220	5179400	4634900	5272400	1.27479	9.47462e-05	0.0354741	6.81244	2.76817	up
pmb3041	UPLC-MS/MS	C23H22O14	Tricin-7-O-saccharic acid	苜蓿素-7-O-葡萄糖二酸苷	Flavonoids	黄酮	Flavones	黄酮	-	1071300	1779800	947550	822920	241920	459360	1.0244	0.0808521	0.184008	0.401248	-1.31743	down
pmn001710	UPLC-MS/MS	C24H26O13	Rosmarinic acid-3'-O-glucoside	迷迭香酸-3'-O-葡萄糖苷	Phenolic acids	酚酸类	Phenolic acids	酚酸类	910028-78-3	859120	715460	375530	89250	169120	139340	1.22786	0.0654033	0.160094	0.203942	-2.29377	down
Jmzn003343	UPLC-MS/MS	C26H34O11	Saikolignanoside A	Saikolignanoside A	Lignans and Coumarins	木脂素和香豆素	Lignans	木脂素	-	4920700	5867000	4808100	3491200	1179600	2360700	1.06669	0.0324588	0.118286	0.450859	-1.14925	down
Lmjp003822	UPLC-MS/MS	C26H26O12	3,5-O-Dicaffeoylquinic Acid Methyl Ester	3,5-O-双咖啡酰奎宁酸甲酯	Phenolic acids	酚酸类	Phenolic acids	酚酸类	159934-13-1	3129600	3019000	2280200	8742600	3399000	12863000	1.006	0.180137	0.300003	2.96657	1.56879	up
Lmjp003731	UPLC-MS/MS	C26H26O12	3,4-O-Dicaffeoylquinic Acid Methyl Ester	3,4-O-双咖啡酰奎宁酸甲酯	Phenolic acids	酚酸类	Phenolic acids	酚酸类	-	3265700	2863600	2166700	8875900	3439700	13020000	1.01399	0.175621	0.295499	3.05395	1.61068	up
MWStz043	UPLC-MS/MS	C26H26O12	3,4-Di-O-caffeoylquinic acid methyl ester	3,4-O-二咖啡酰基奎宁酸甲酯	Phenolic acids	酚酸类	Phenolic acids	酚酸类	114637-83-1	1411800	1165100	1066400	3708600	1598400	5612400	1.04468	0.170562	0.289308	2.99712	1.58358	up
Lmhp007598	UPLC-MS/MS	C27H52NO7P	LysoPC 19:2(2n isomer)	溶血磷脂酰胆碱 19:2(2n异构)	Lipids	脂质	LPC	溶血磷脂酰胆碱	-	81229	49903	203660	15119	21977	30473	1.1234	0.197042	0.313072	0.201824	-2.30883	down
Lmdp004892	UPLC-MS/MS	C24H22O14	Kaempferol-3-O-(6''-malonyl)galactoside	山奈酚-3-O-(6''-丙二酰)半乳糖苷	Flavonoids	黄酮	Flavonols	黄酮醇	-	2705400	2204600	1968800	7824000	11402000	9202900	1.29503	0.0170654	0.0992405	4.13283	2.04713	up
Lmmp003817	UPLC-MS/MS	C24H22O14	Kaempferol-3-O-(6''-malonyl)glucoside	山奈酚-3-O-(6''-丙二酰)葡萄糖苷	Flavonoids	黄酮	Flavonols	黄酮醇	-	2971400	1826300	1741000	6413400	8877000	8678000	1.26275	0.00756493	0.092265	3.66562	1.87406	up
mws1642	UPLC-MS/MS	C27H34O11	Phillyrin	连翘苷	Lignans and Coumarins	木脂素和香豆素	Lignans	木脂素	487-41-2	22959	34665	41471	407050	67969	551130	1.10326	0.163448	0.282232	10.3552	3.37228	up
mws0092	UPLC-MS/MS	C27H34O11	Arctiin	牛蒡子苷	Lignans and Coumarins	木脂素和香豆素	Lignans	木脂素	20362-31-6	61394	55803	15186	348600	103610	550170	1.09382	0.152142	0.269571	7.57182	2.92064	up
Lmhp010908	UPLC-MS/MS	C27H54NO7P	LysoPC 19:1	溶血磷脂酰胆碱 19:1	Lipids	脂质	LPC	溶血磷脂酰胆碱	-	27969	38639	23099	68186	79781	63013	1.23901	0.00399534	0.0864396	2.35188	1.23381	up
pmn001375	UPLC-MS/MS	C26H32O12	1-Hydroxypinoresinol-1-O-Glucoside	1-羟基松脂醇-1-O-葡萄糖苷	Lignans and Coumarins	木脂素和香豆素	Lignans	木脂素	81495-71-8	100830	204580	241380	9	9	9	1.31986	0.0493915	0.13993	4.93791e-05	-14.3057	down
Hmln002100	UPLC-MS/MS	C26H32O12	Nortrachelogenin-4-O-glucoside	去甲络石苷元-4-O-葡萄糖苷	Lignans and Coumarins	木脂素和香豆素	Lignans	木脂素	33464-78-7	386830	687380	408360	161760	34488	171630	1.07895	0.0442549	0.132989	0.248135	-2.0108	down
Lmdn001925	UPLC-MS/MS	C26H34O12	Olivil-4'-O-glucoside	橄榄树脂素-4'-O-葡萄糖苷	Lignans and Coumarins	木脂素和香豆素	Lignans	木脂素	76880-93-8	316190	653260	1154700	252150	169600	272050	1.03006	0.187648	0.304254	0.326625	-1.61429	down
pmc0960	UPLC-MS/MS	C28H50NO7P	LysoPC 20:4	溶血磷脂酰胆碱 20:4	Lipids	脂质	LPC	溶血磷脂酰胆碱	-	18392	4783.5	17329	9	9	4267.5	1.02388	0.0982478	0.206895	0.105803	-3.24055	down
pmb0608	UPLC-MS/MS	C25H24O14	Chrysoeriol-7-O-(6''-malonyl)glucoside	金圣草黄素-7-O-(6''-丙二酰)葡萄糖苷	Flavonoids	黄酮	Flavones	黄酮	-	7062	22738	7613.2	565510	658130	666240	1.30129	0.00222185	0.0727185	50.5137	5.6586	up
pmp000588	UPLC-MS/MS	C25H24O14	Diosmetin-7-O-(6''-malonyl)glucoside	香叶木素-7-O-(6''-O-丙二酰)葡萄糖苷	Flavonoids	黄酮	Flavones	黄酮	-	9	9	9	87693	77475	150710	1.32081	0.0441948	0.132989	11699.2	13.5141	up
Lmhp011549	UPLC-MS/MS	C28H56NO7P	LysoPC 20:1	溶血磷脂酰胆碱 20:1	Lipids	脂质	LPC	溶血磷脂酰胆碱	-	13512	6363.6	14755	32447	22925	26076	1.11554	0.0153297	0.0986287	2.35191	1.23383	up
Hmln002355	UPLC-MS/MS	C27H34O12	5'-Methoxymatairesinoside	5'-甲氧基罗汉松脂苷	Lignans and Coumarins	木脂素和香豆素	Lignans	木脂素	1691201-82-7	249410	78651	571170	18130	14738	94292	1.03243	0.213803	0.332168	0.14141	-2.82205	down
Lmmn002260	UPLC-MS/MS	C27H36O12	5'-Methoxyisolariciresinol-9'-O-glucoside	5'-甲氧基异落叶松脂醇-9'-O-葡萄糖苷	Lignans and Coumarins	木脂素和香豆素	Lignans	木脂素	-	198790	316690	558660	975450	639390	643150	1.0288	0.0623208	0.156518	2.10214	1.07186	up
HJAP064	UPLC-MS/MS	C25H24O15	Isorhamnetin-3-O-(6''-malonyl)glucoside	异鼠李素-3-O-(6''-丙二酰)葡萄糖苷	Flavonoids	黄酮	Flavonols	黄酮醇	-	449950	1850700	542620	9109100	9369800	19548000	1.24172	0.0737916	0.172795	13.3744	3.7414	up
Zmhp005139	UPLC-MS/MS	C25H24O15	Tamarixetin-3-O-(6''-malonyl)glucoside	柽柳黄素-3-O-(6''-丙二酰)葡萄糖苷	Flavonoids	黄酮	Flavonols	黄酮醇	-	470840	2087100	514870	9129100	9722400	15976000	1.23544	0.034128	0.118781	11.3341	3.5026	up
Zmjp003463	UPLC-MS/MS	C26H28O14	Vitexin-2''-O-xyloside	牡荆素-2''-O-木糖苷	Flavonoids	黄酮	Flavonoid carbonoside	黄酮碳糖苷	-	28799000	28650000	31138000	9	9	9	1.32221	0.00074355	0.0576089	3.04785e-07	-21.6457	down
Hmcp001858	UPLC-MS/MS	C26H28O14	Kaempferol-3-O-arabinoside-7-O-rhamnoside	山奈酚-3-O-阿拉伯糖苷-7-O-鼠李糖苷	Flavonoids	黄酮	Flavonols	黄酮醇	-	1395500	1252300	1343200	9	9	9	1.32225	0.000987505	0.0585686	6.76522e-06	-17.1734	down
Lmnp202580	UPLC-MS/MS	C26H28O14	Apigenin-8-C-(2''-xylosyl)glucoside	芹菜素-8-C-(2''-木糖基)葡萄糖苷	Flavonoids	黄酮	Flavonoid carbonoside	黄酮碳糖苷	-	22184000	24654000	21651000	9	9	9	1.32215	0.00163782	0.0648576	3.94224e-07	-21.2745	down
pmp000411	UPLC-MS/MS	C26H28O14	Genistein-8-C-apiosyl(1→6)glucoside	染料木素-8-C-芹糖基(1→6)葡萄糖苷	Flavonoids	黄酮	Isoflavones	异黄酮	-	3407200	1565800	3573800	9	9	9	1.32141	0.0474015	0.136904	3.15908e-06	-18.2721	down
Lmnp102580	UPLC-MS/MS	C26H28O14	Apigenin-6-C-(2''-xylosyl)glucoside	芹菜素-6-C-(2''-木糖基)葡萄糖苷	Flavonoids	黄酮	Flavonoid carbonoside	黄酮碳糖苷	-	74915000	69636000	65923000	17038	9937.8	12552	1.32129	0.0013804	0.0585686	0.000187804	-12.3785	down
Lmqp007331	UPLC-MS/MS	C30H26O12	Kaempferol-3-O-(3''-O-p-Coumaroyl)rhamnoside	山奈酚-3-O-(3''-O-对香豆酰)鼠李糖苷	Flavonoids	黄酮	Flavonols	黄酮醇	-	99184	63765	99537	180910	196970	267190	1.21614	0.0257103	0.111998	2.45754	1.29722	up
Lmqp007185	UPLC-MS/MS	C30H26O12	Kaempferol-3-O-(4''-O-p-Coumaroyl)rhamnoside	山奈酚-3-O-(4''-O-对香豆酰)鼠李糖苷	Flavonoids	黄酮	Flavonols	黄酮醇	-	102430	53404	99408	207660	207990	372820	1.17359	0.0740091	0.172849	3.08911	1.62719	up
Lmmp006709	UPLC-MS/MS	C30H26O12	Kaempferol-3-O-(4''-p-coumaroyl)rhamnoside	山奈酚-3-O-(4''-对香豆酰基)鼠李糖苷	Flavonoids	黄酮	Flavonols	黄酮醇	-	9	9	9	14447	16537	27492	1.3203	0.0405086	0.1262	2165.78	11.0807	up
MWSHY0201	UPLC-MS/MS	C27H30O14	Kaempferol-3,7-O-dirhamnoside (Kaempferitrin)	山奈酚-3,7-O-二鼠李糖苷 (山奈苷)	Flavonoids	黄酮	Flavonols	黄酮醇	482-38-2	1815900	1799900	2090600	9	9	9	1.32218	0.00245118	0.0766315	4.73153e-06	-17.6893	down
pme0368	UPLC-MS/MS	C27H30O14	Apigenin-7-O-rutinoside (Isorhoifolin)	芹菜素-7-O-芸香糖苷 (异野漆树苷)	Flavonoids	黄酮	Flavones	黄酮	552-57-8	245730	127320	101920	9	9	9	1.32063	0.0702006	0.167243	5.68457e-05	-14.1026	down
HJAP148	UPLC-MS/MS	C26H28O15	Kaempferol-3-O-sambubioside	山奈酚-3-O-桑布双糖苷	Flavonoids	黄酮	Flavonols	黄酮醇	27661-51-4	6436500	6159500	6942700	9	9	9	1.32222	0.00123718	0.0585686	1.38187e-06	-19.4649	down
Hmcp001769	UPLC-MS/MS	C26H28O15	Quercetin-3-O-rhamnosyl(1→2)arabinoside	槲皮素-3-O-鼠李糖基(1→2)阿拉伯糖苷	Flavonoids	黄酮	Flavonols	黄酮醇	-	56197000	64567000	47349000	9	9	9	1.32206	0.00777761	0.092265	1.60606e-07	-22.57	down
mws1066	UPLC-MS/MS	C27H32O14	Naringenin-7-O-Rutinoside(Narirutin)	柚皮素-7-O-芸香糖苷(芸香柚皮苷)	Flavonoids	黄酮	Flavanones	二氢黄酮	14259-46-2	187840	133560	23453	9	9	9	1.30937	0.140611	0.255421	7.82942e-05	-13.6407	down
mws0046	UPLC-MS/MS	C27H32O14	Naringenin-7-O-Neohesperidoside(Naringin)	柚皮素-7-O-新橙皮糖苷(柚皮苷)	Flavonoids	黄酮	Flavanones	二氢黄酮	10236-47-2	692370	343460	60926	9	9	9	1.30946	0.183249	0.302373	2.46181e-05	-15.3099	down
Lmqn001932	UPLC-MS/MS	C28H36O13	Syringaresinol-4'-O-glucoside	丁香树脂酚-4'-O-葡萄糖苷	Lignans and Coumarins	木脂素和香豆素	Lignans	木脂素	7374-79-0	93858	98137	108920	598040	768560	829510	1.31419	0.0115514	0.0986287	7.29811	2.86752	up
Hmgp003641	UPLC-MS/MS	C28H32O14	Chrysoeriol-6-C-rhamnoside-7-O-rhamnoside	金圣草黄素-6-C-鼠李糖苷-7-O-鼠李糖苷	Flavonoids	黄酮	Flavones	黄酮	-	48185	66840	14002	9	9	9	1.31324	0.10874	0.217493	0.000209259	-12.2224	down
Lmdn004868	UPLC-MS/MS	C29H36O13	Jionoside C	焦地黄苯乙醇苷 C	Phenolic acids	酚酸类	Phenolic acids	酚酸类	120406-33-9	148450	216250	222830	9	9	9	1.32154	0.014418	0.0986287	4.59551e-05	-14.4094	down
mws1290	UPLC-MS/MS	C30H26O13	Kaempferol-3-O-(6''-p-Coumaroyl)glucoside (Tiliroside)	山奈酚-3-O-(6''-对香豆酰)葡萄糖苷 (银锻苷)	Flavonoids	黄酮	Flavones	黄酮	20316-62-5	54974	65070	36547	9	9	9	1.32103	0.0246574	0.111998	0.000172424	-12.5018	down
pmb2586	UPLC-MS/MS	C30H26O13	Gallocatechin-(4α→8)-catechin	没食子儿茶素-(4α→8)-儿茶素	Flavonoids	黄酮	Flavanols	黄烷醇类	-	115010	249610	95660	9	9	9	1.31926	0.0868158	0.1929	5.86599e-05	-14.0573	down
Zmcp003989	UPLC-MS/MS	C27H30O15	Kaempferol-3-O-rhamnosyl(1→2)glucoside	山奈酚-3-O-鼠李糖基(1→2)葡萄糖苷	Flavonoids	黄酮	Flavonols	黄酮醇	-	35404000	57668000	34663000	302960	141270	423570	1.30828	0.0303978	0.113987	0.00679375	-7.20158	down
pmp000593	UPLC-MS/MS	C27H30O15	Luteolin-7-O-rutinoside	木犀草素-7-O-芸香糖苷	Flavonoids	黄酮	Flavones	黄酮	3563-98-2	2259000	6716200	2368200	597250	1483300	1191700	1.04694	0.205365	0.321299	0.288472	-1.7935	down
Lmsn002815	UPLC-MS/MS	C27H30O15	Kaempferol-3-O-rutinoside(Nicotiflorin)	山奈酚-3-O-芸香糖苷(烟花苷)	Flavonoids	黄酮	Flavonols	黄酮醇	17650-84-9	922780	2178100	933000	111240	440960	310920	1.11889	0.120106	0.231029	0.213968	-2.22454	down
MWSslk254	UPLC-MS/MS	C27H30O15	Kaempferol-3-O-glucorhamnoside	山奈酚-3-O-葡萄糖鼠李糖苷	Flavonoids	黄酮	Flavonols	黄酮醇	40437-72-7	214520	451460	154720	25605	107330	72876	1.06078	0.144691	0.259657	0.250775	-1.99553	down
pmp001106	UPLC-MS/MS	C27H30O15	Vitexin-2''-O-glucoside	牡荆素-2''-O-葡萄糖苷	Flavonoids	黄酮	Flavonoid carbonoside	黄酮碳糖苷	61360-94-9	2534200	6331800	3232200	10988000	10215000	13396000	1.18247	0.0084395	0.092265	2.85985	1.51594	up
Lmnp202682	UPLC-MS/MS	C27H30O15	5,7,4'-Trihydroxy-8-methoxyflavone-6-C-[Xylosyl-(1-2)]-glucoside	5,7,4'-三羟基-8-甲氧基黄酮-6-C-[木糖-(1-2)]-葡萄糖苷	Flavonoids	黄酮	Flavonoid carbonoside	黄酮碳糖苷	-	342900	25909000	1507600	8280.8	9	9	1.17446	0.382626	0.504952	0.000298954	-11.7078	down
MWSHY0061	UPLC-MS/MS	C27H30O15	Kaempferol-3-O-neohesperidoside	山奈酚-3-O-新橙皮糖苷	Flavonoids	黄酮	Flavonols	黄酮醇	32602-81-6	10200000	17683000	7520100	2773200	5728800	5174400	1.06939	0.130763	0.243489	0.386305	-1.37219	down
Lmnp102682	UPLC-MS/MS	C27H30O15	Hispidulin-8-C-(2''-O-xylosyl)glucoside	高车前素-8-C-(2''-O-木糖基)葡萄糖苷	Flavonoids	黄酮	Flavonoid carbonoside	黄酮碳糖苷	-	389190	27774000	1860800	9	9	9	1.29512	0.377335	0.500679	8.99281e-07	-20.0847	down
mws1073	UPLC-MS/MS	C27H30O15	Apigenin-6,8-di-C-glucoside (Vicenin-2)	芹菜素-6,8-二-C-葡萄糖苷 (新西兰牡荆苷 II)	Flavonoids	黄酮	Flavonoid carbonoside	黄酮碳糖苷	23666-13-9	17129000	38368000	20077000	53708000	49351000	56188000	1.12991	0.0427373	0.130185	2.10717	1.0753	up
MWSHY0080	UPLC-MS/MS	C27H30O15	Luteolin-7-O-neohesperidoside (Lonicerin)	木犀草素-7-O-新橘皮糖苷 (忍冬苷)	Flavonoids	黄酮	Flavones	黄酮	25694-72-8	9902900	17641000	6760300	2646500	5138000	4252500	1.09117	0.142692	0.257626	0.35089	-1.51091	down
Lmsp004670	UPLC-MS/MS	C27H30O15	Kaempferol-3-O-glucoside-7-O-rhamnoside	山奈酚-3-O-葡萄糖苷-7-O-鼠李糖苷	Flavonoids	黄酮	Flavonols	黄酮醇	-	9408900	20641000	7336900	2770100	5176100	4978400	1.05722	0.183649	0.302376	0.3457	-1.53241	down
Hmmp003156	UPLC-MS/MS	C27H30O15	Saponarin(Isovitexin-7-O-glucoside)	皂草苷(异牡荆素-7-O-葡萄糖苷)	Flavonoids	黄酮	Flavones	黄酮	20310-89-8	152780	310680	136360	549810	470820	625440	1.18419	0.00907372	0.0963146	2.74427	1.45642	up
mws0791	UPLC-MS/MS	C28H34O14	Poncirin (Isosakuranetin-7-O-neohesperidoside)	枸橘苷	Flavonoids	黄酮	Flavanones	二氢黄酮	14941-08-3	44204	87613	27608	9	9	9	1.31766	0.0971247	0.206028	0.000169359	-12.5276	down
Lmtp004044	UPLC-MS/MS	C26H28O16	Quercetin-3-O-apiosyl(1→2)galactoside	槲皮素-3-O-芹糖基(1→2)半乳糖苷	Flavonoids	黄酮	Flavonols	黄酮醇	-	583510	603100	647980	9	9	22744	1.12871	0.000227058	0.0367834	0.0124071	-6.33269	down
Zmjp003031	UPLC-MS/MS	C27H30O16	Orientin-2''-O-galactoside	荭草素-2''-O-半乳糖苷	Flavonoids	黄酮	Flavonoid carbonoside	黄酮碳糖苷	-	10265000	15036000	4609700	3175100	992240	2334900	1.10893	0.116708	0.227543	0.217388	-2.20165	down
Lmjp002461	UPLC-MS/MS	C27H30O16	Quercetin-3-O-neohesperidoside	槲皮素 3-O-新橘皮糖苷	Flavonoids	黄酮	Flavonols	黄酮醇	117611-67-3	560180	632390	206720	98252	33971	69760	1.18516	0.0907921	0.198031	0.144347	-2.79239	down
Zmhp003716	UPLC-MS/MS	C27H30O16	Rhodionidin	Rhodionidin	Flavonoids	黄酮	Flavonols	黄酮醇	-	47408000	50720000	21427000	18452000	4756900	11346000	1.06459	0.0755893	0.175163	0.289029	-1.79071	down
Zmhn002032	UPLC-MS/MS	C28H34O15	4-O-(6'-O-Glucosylcaffeoylglucosyl)-4-hydroxybenzyl alcohol	4-O-(6'-O-葡萄糖基咖啡酰葡萄糖基)-4-羟基苄醇	Phenolic acids	酚酸类	Phenolic acids	酚酸类	-	3541500	4050800	1377800	726540	195290	679920	1.12582	0.0899378	0.196891	0.178565	-2.48548	down
Cmdn003997	UPLC-MS/MS	C25H38O17	6'-O-α-D-galactopyranosylbarlerin	6'-O-α-D-半乳糖基(8-O-乙酰山栀苷甲酯)	Terpenoids	萜类	Monoterpenoids	倍萜	927691-89-2	3617600	5785400	1471800	614310	217700	636000	1.1604	0.126455	0.238206	0.134992	-2.88906	down
Lhcp102427	UPLC-MS/MS	C36H58O8	3-O-β-D-Fucopyranosyl saikogenin F(iso-02)	前柴胡皂苷元F(iso-02)	Terpenoids	萜类	Triterpene Saponin	三萜皂苷	-	12384	38733	4669.9	9	9	9	1.30292	0.213262	0.331617	0.000483985	-11.0128	down
pmp000241	UPLC-MS/MS	C27H28O17	Luteolin-6-C-(2''-glucuronyl)glucoside	木犀草素-6-C-(2''-葡萄糖醛酸基)葡萄糖苷	Flavonoids	黄酮	Flavones	黄酮	-	9	9	9	28248	38222	51762	1.32092	0.0286281	0.111998	4378.96	12.0964	up
Lmzn001664	UPLC-MS/MS	C27H28O17	Kaempferol-3-O-glucuronide-7-O-glucoside	山奈酚-3-O-葡萄糖醛酸苷-7-O-葡萄糖苷	Flavonoids	黄酮	Flavonols	黄酮醇	-	9	9	9	4236200	753000	2661500	1.31762	0.12692	0.238828	283359	18.1123	up
Hmlp004943	UPLC-MS/MS	C28H32O16	Nitensoside B	Nitensoside B	Lignans and Coumarins	木脂素和香豆素	Coumarins	香豆素	-	83226	506290	117800	692070	728280	1159400	1.07506	0.037248	0.121791	3.64724	1.8668	up
Lmsp003939	UPLC-MS/MS	C28H32O16	Isorhamnetin-3-O-galactoide-7-O-rhamnoside	异鼠李素-3-O-半乳糖苷-7-O-鼠李糖苷	Flavonoids	黄酮	Flavonols	黄酮醇	-	2486300	34849000	6855000	54708000	53769000	51058000	1.02202	0.0614424	0.155626	3.61018	1.85207	up
Lmnp002584	UPLC-MS/MS	C28H32O16	Hispidulin-8-C-(2''-O-glucosyl)glucoside	高车前素-8-C-(2''-O-葡萄糖基)葡萄糖苷	Flavonoids	黄酮	Flavonoid carbonoside	黄酮碳糖苷	-	446110	8580500	1448600	17514000	18765000	13228000	1.04929	0.0179707	0.0992405	4.72611	2.24065	up
Lmsp004045	UPLC-MS/MS	C28H32O16	Isorhamnetin-3-O-glucoside-7-O-rhamnoside	异鼠李素-3-O-葡萄糖苷-7-O-鼠李糖苷	Flavonoids	黄酮	Flavonols	黄酮醇	-	2506900	34373000	7192000	51051000	59017000	46240000	1.01604	0.049906	0.140195	3.54666	1.82646	up
Lmmp002963	UPLC-MS/MS	C28H32O16	6-C-Methylquercetin-3-O-rutinoside	6-C-甲基槲皮素-3-O-芸香糖苷	Flavonoids	黄酮	Flavonols	黄酮醇	-	22026	313000	40397	546450	428400	404560	1.02312	0.0525562	0.143068	3.67428	1.87746	up
Lmmp002463	UPLC-MS/MS	C28H32O16	Sexangularetin-3-O-glucoside-7-O-rhamnoside	3,5,7,4'-四羟基-8-甲氧基黄酮-3-O-葡萄糖苷-7-O-鼠李糖苷	Flavonoids	黄酮	Flavonols	黄酮醇	-	64585	427600	117640	474180	835490	844270	1.05657	0.0367147	0.121229	3.53206	1.82051	up
Lmsp004721	UPLC-MS/MS	C28H32O16	Tamarixetin-3-O-glucoside-7-O-rhamnoside	柽柳黄素-3-O-葡萄糖苷-7-O-鼠李糖苷	Flavonoids	黄酮	Flavonols	黄酮醇	-	79075	518450	167670	543470	733070	1212000	1.01827	0.0838833	0.188499	3.25216	1.7014	up
pme1540	UPLC-MS/MS	C28H32O16	Isorhamnetin-3-O-neohesperidoside	异鼠李素-3-O-新橙皮糖苷	Flavonoids	黄酮	Flavonols	黄酮醇	55033-90-4	691700	10125000	1370900	15522000	11770000	16411000	1.01494	0.0560557	0.147545	3.58586	1.84232	up
MWSHY0135	UPLC-MS/MS	C28H32O16	Isorhamnetin-3-O-rutinoside (Narcissin)	异鼠李素-3-O-芸香糖苷 (水仙苷)	Flavonoids	黄酮	Flavones	黄酮	604-80-8	75819	506300	138950	551510	865490	1150300	1.0497	0.0516711	0.141877	3.56041	1.83204	up
Lmhp003217	UPLC-MS/MS	C28H32O16	2'-Hydoxy,5-methoxyGenistein-O-rhamnosyl-glucoside	2'-羟基-5-甲氧基染料木素-O-鼠李糖-葡萄糖	Flavonoids	黄酮	Isoflavones	异黄酮	-	73232	543660	138310	658330	750340	1203300	1.04122	0.0514905	0.141877	3.45864	1.7902	up
pmp000127	UPLC-MS/MS	C28H32O16	Chrysoeriol-6,8-di-C-glucoside	金圣草黄素-6,8-二-C-葡萄糖苷	Flavonoids	黄酮	Flavonoid carbonoside	黄酮碳糖苷	-	9	9	9	145240	119300	182260	1.32173	0.0147166	0.0986287	16548.1	14.0144	up
Zmhn002574	UPLC-MS/MS	C28H32O16	Rhamnazin 3-Glucosyl-Arabinofuranoside	鼠李秦素-3-O-葡萄糖-阿拉伯糖	Flavonoids	黄酮	Flavones	黄酮	-	134540	25916	21639	9	9	9	1.31097	0.242125	0.360157	0.000148274	-12.7194	down
HJAP026	UPLC-MS/MS	C28H32O16	Chrysoeriol-6-C-glucoside-4'-O-glucoside	金圣草黄素-6-C-葡萄糖苷-4'-O-葡萄糖苷	Flavonoids	黄酮	Flavonoid carbonoside	黄酮碳糖苷	-	652640	10173000	1922600	18194000	17265000	14759000	1.03134	0.040913	0.127016	3.93921	1.97791	up
Lmcn005735	UPLC-MS/MS	C29H36O15	Methylhesperidin	甲基橙皮苷	Flavonoids	黄酮	Flavones	黄酮	11013-97-1	149620	33198	19698	9	9	9	1.30998	0.243357	0.361386	0.000133323	-12.8728	down
Zmhn000666	UPLC-MS/MS	C29H36O15	Magnoloside A	厚朴苷 A	Phenolic acids	酚酸类	Phenolic acids	酚酸类	113557-95-2	51824	126320	121540	9	9	9	1.31905	0.0534757	0.14456	9.00949e-05	-13.4382	down
pmp001311	UPLC-MS/MS	C27H30O17	6-Hydroxykaempferol-7,6'-O-Diglucoside	6-羟基山奈酚-7,6'-O-二葡萄糖苷	Flavonoids	黄酮	Flavonols	黄酮醇	-	1773900	2314300	553410	8099900	8267200	5285200	1.16011	0.0133275	0.0986287	4.66483	2.22182	up
Zmcp002666	UPLC-MS/MS	C27H30O17	Quercetin-3,7-Di-O-glucoside	槲皮素-3,7-二-O-葡萄糖苷	Flavonoids	黄酮	Flavonols	黄酮醇	-	1420100	1777600	329730	5721900	4031000	2611900	1.03174	0.0629159	0.157224	3.50533	1.80955	up
pmp001310	UPLC-MS/MS	C27H30O17	6-Hydroxykaempferol-3,6-O-Diglucoside	6-羟基山奈酚-3,6-O-二葡萄糖苷	Flavonoids	黄酮	Flavonols	黄酮醇	-	200260	431050	113320	1627600	1916200	1485100	1.23679	0.00118697	0.0585686	6.75356	2.75565	up
pmb0645	UPLC-MS/MS	C28H34O16	Hesperetin-6-C-glucoside-7-O-glucoside	橙皮素-6-C-葡萄糖苷-7-O-葡萄糖苷	Flavonoids	黄酮	Flavonoid carbonoside	黄酮碳糖苷	-	46116	47356	25542	208930	231410	199790	1.28605	0.000195152	0.0354741	5.37861	2.42723	up
pmb0618	UPLC-MS/MS	C28H34O16	Hesperetin-8-C-glucoside-3'-O-glucoside	橙皮素-8-C-葡萄糖苷-3'-O-葡萄糖苷	Flavonoids	黄酮	Flavonoid carbonoside	黄酮碳糖苷	-	356100	382540	125970	1240400	1086600	1149700	1.19221	0.0022444	0.0727185	4.02112	2.0076	up
Hmlp002975	UPLC-MS/MS	C28H30O17	Isorhamnetin-3-O-glucuronide-7-O-rhamnoside	异鼠李素-3-O-葡萄糖醛酸苷-7-O-鼠李糖苷	Flavonoids	黄酮	Flavonols	黄酮醇	-	9	9	9	313450	271680	438940	1.32165	0.0209988	0.103085	37928.5	15.211	up
Lmmp002560	UPLC-MS/MS	C27H28O18	Quercetin-3-O-(2''-O-glucosyl)glucuronide	槲皮素-3-O-(2''-O-葡萄糖基)葡萄糖醛酸苷	Flavonoids	黄酮	Flavonols	黄酮醇	-	9	9	9	433190	122300	249340	1.31886	0.0969804	0.205982	29808.5	14.8634	up
Hmcp001578	UPLC-MS/MS	C28H32O17	Isorhamnetin-3,7-O-diglucoside	异鼠李素-3,7-O-二葡萄糖苷	Flavonoids	黄酮	Flavonols	黄酮醇	6758-51-6	47878	326580	40965	4298500	1991200	3317000	1.23285	0.0420951	0.129111	23.1251	4.53139	up
Lmhp002800	UPLC-MS/MS	C28H32O17	2'-Hydoxy,5-methoxyGenistein-4',7-O-diglucoside	2'-羟基-5-甲氧基染料木素-4',7-O-二葡萄糖	Flavonoids	黄酮	Isoflavones	异黄酮	-	10202	66930	20956	248730	295020	92257	1.11924	0.0902426	0.197074	6.48404	2.69689	up
Lmsp003252	UPLC-MS/MS	C28H32O17	Isorhamnetin-3-O-sophoroside	异鼠李素-3-O-槐糖苷	Flavonoids	黄酮	Flavonols	黄酮醇	-	152880	994600	163260	13875000	7925500	9892000	1.24868	0.0261283	0.111998	24.1791	4.59569	up
mws1153	UPLC-MS/MS	C31H38O16	2'-Acetylacteoside	2'-乙酰毛蕊花糖苷	Phenolic acids	酚酸类	Phenolic acids	酚酸类	94492-24-7	276830	548800	236980	77978	85141	165120	1.1309	0.120627	0.231507	0.308899	-1.69479	down
pmp001276	UPLC-MS/MS	C33H56O14	1-Linolenoyl-rac-glycerol-diglucoside	1-亚麻酰单甘油酯-二葡萄糖苷	Lipids	脂质	Free fatty acids	游离脂肪酸	-	905210	992320	823960	2146600	4019300	2148300	1.22763	0.0952552	0.203287	3.05502	1.61118	up
Lmhp008513	UPLC-MS/MS	C33H56O14	2-α-Linolenoyl-glycerol-1,3-di-O-glucoside	2-α-亚麻酸甘油酯-1,3-二-O-葡萄糖苷	Lipids	脂质	Glycerol ester	甘油酯	-	37844	26284	109240	177260	170860	197780	1.11035	0.0316846	0.116852	3.14879	1.6548	up
Lmyn005812	UPLC-MS/MS	C33H56O14	Gingerglycolipid A	姜糖脂 A	Lipids	脂质	Glycerol ester	甘油酯	145937-22-0	327930	646320	437970	4049800	4880200	3329800	1.29706	0.0122391	0.0986287	8.68123	3.1179	up
Lmhp008744	UPLC-MS/MS	C33H56O14	1-α-Linolenoyl-glycerol-2,3-di-O-glucoside	1-α-亚麻酸甘油酯-2,3-二-O-葡萄糖苷	Lipids	脂质	Glycerol ester	甘油酯	-	45263	118910	102140	280130	685630	194280	1.09608	0.185857	0.303727	4.35593	2.12298	up
Lmyn006011	UPLC-MS/MS	C33H58O14	Gingerglycolipid B	姜糖脂 B	Lipids	脂质	Glycerol ester	甘油酯	88168-90-5	17634	28736	50860	349660	298360	299480	1.28004	0.000499457	0.0556271	9.74493	3.28465	up
Lmhp009190	UPLC-MS/MS	C33H58O14	2-Linoleoylglycerol-1,3-di-O-glucoside	2-亚油酰甘油酯-1,3-二-O-葡萄糖苷	Lipids	脂质	Glycerol ester	甘油酯	-	53352	106510	79486	172620	181230	186130	1.19944	0.0176003	0.0992405	2.25605	1.1738	up
Lmhp009384	UPLC-MS/MS	C33H58O14	1-Linoleoylglycerol-2,3-di-O-glucoside	1-亚油酰甘油酯-2,3-二-O-葡萄糖苷	Lipids	脂质	Glycerol ester	甘油酯	-	7846.9	7411.1	9754.4	50346	47903	57745	1.3139	0.00302678	0.0806957	6.23667	2.64078	up
Lmyn006221	UPLC-MS/MS	C33H60O14	Gingerglycolipid C	姜糖脂 C	Lipids	脂质	Glycerol ester	甘油酯	-	2824.6	1987.3	3388.2	17243	13306	17541	1.29468	0.00653214	0.092265	5.86456	2.55202	up
Hmln001931	UPLC-MS/MS	C32H42O16	Matairesinol-4,4'-di-O-glucoside	罗汉松脂酚-4,4'-di-O-葡萄糖苷	Lignans and Coumarins	木脂素和香豆素	Lignans	木脂素	-	168090	2928200	88879	26696	9866.2	26044	1.04309	0.38087	0.504007	0.0196555	-5.66892	down
Hmcp001947	UPLC-MS/MS	C31H34O19	Isorhamnetin-3-O-(6''-malonyl)glucoside-7-O-rhamnoside	异鼠李素-3-O-(6''-丙二酰)葡萄糖苷-7-O-鼠李糖苷	Flavonoids	黄酮	Flavonols	黄酮醇	-	76343	162090	156940	1614900	465960	1044100	1.21279	0.110153	0.219077	7.90383	2.98255	up
pmb0706	UPLC-MS/MS	C30H32O20	Quercetin-3-O-(6''-O-malonyl)glucosyl-5-O-glucoside	槲皮素-3-O-(6''-O-丙二酰)葡萄糖苷-5-O-葡萄糖苷	Flavonoids	黄酮	Flavonols	黄酮醇	-	72129	46796	14353	198550	154750	251210	1.13531	0.0137899	0.0986287	4.53571	2.18133	up
pmn001372	UPLC-MS/MS	C33H44O17	medioresinol-4,4'-di-O-glucoside	杜仲树脂酚-4,4'-二-O-葡萄糖苷	Lignans and Coumarins	木脂素和香豆素	Lignans	木脂素	88142-63-6	158550	134350	151920	584310	202280	356260	1.06957	0.170431	0.289308	2.56924	1.36134	up
Hmcp001658	UPLC-MS/MS	C31H34O20	Isorhamnetin-3-O-(6''-malonyl)glucoside-7-O-glucoside	异鼠李素-3-O-(6''-丙二酰)葡萄糖苷-7-O-葡萄糖苷	Flavonoids	黄酮	Flavonols	黄酮醇	-	11455	17799	9779.2	374560	381080	448870	1.31515	0.00343379	0.0838222	30.8586	4.9476	up
Xmyp004678	UPLC-MS/MS	C32H38O19	Kaempferol-3-O-(2-O-Xylosyl-6-O-Rhamnosyl)Glucoside	山奈酚-3-O-(2''-O-木糖基-6''-O-鼠李糖基)葡萄糖苷	Flavonoids	黄酮	Flavonols	黄酮醇	-	4027100	2723800	3087600	9	9	9	1.32218	0.0137292	0.0986287	2.74432e-06	-18.4751	down
Zmlp003063	UPLC-MS/MS	C33H40O19	Luteolin-7-O-(2''-O-rhamnosyl)rutinoside	木犀草素-7-O-(2''-O-鼠李糖基)芸香糖苷	Flavonoids	黄酮	Flavones	黄酮	-	4282500	17126000	4122800	268810	280420	271170	1.26632	0.196024	0.312299	0.0321331	-4.9598	down
Lmsp003881	UPLC-MS/MS	C33H40O19	Kaempferol-3-O-rutinoside-7-O-rhamnoside	山奈酚-3-O-芸香糖苷-7-O-鼠李糖苷	Flavonoids	黄酮	Flavonols	黄酮醇	-	1735900	5130500	1826000	158940	134250	154610	1.27987	0.132979	0.246329	0.0515163	-4.27883	down
Hmdp103165	UPLC-MS/MS	C33H40O19	Clitorin	蝶豆素	Flavonoids	黄酮	Flavones	黄酮	55804-74-5	1696500	6783500	1836500	125770	123410	144390	1.2651	0.186628	0.303796	0.0381496	-4.71219	down
mws1035	UPLC-MS/MS	C33H40O19	Kaempferol-3-O-robinoside-7-O-rhamnoside (Robinin)	山奈酚-3-O-刺槐糖苷-7-O-鼠李糖苷 (刺槐苷)	Flavonoids	黄酮	Flavonols	黄酮醇	301-19-9	3326600	12759000	4032000	168490	207360	251290	1.27607	0.1655	0.284225	0.0311737	-5.00353	down
Hmqp002870	UPLC-MS/MS	C32H38O20	Luteolin-7-O-Sophoroside-5-O-arabinoside	木犀草素-7-O-槐糖苷-5-O-阿拉伯糖苷	Flavonoids	黄酮	Flavones	黄酮	-	103950	72916	141940	9	9	9	1.32134	0.0335179	0.118781	8.4691e-05	-13.5274	down
Hmgp003409	UPLC-MS/MS	C33H40O20	Quercetin-3-O-Soph-7-O-Rha b	Quercetin-3-O-Soph-7-O-Rha b	Flavonoids	黄酮	Flavones	黄酮	-	3451400	3125700	901600	382880	184120	401190	1.17624	0.11247	0.222443	0.12946	-2.94943	down
pmp001105	UPLC-MS/MS	C33H40O20	Kaempferol-3-O-neohesperidoside-7-O-glucoside	山奈酚-3-O-新橙皮糖苷-7-O-葡萄糖苷	Flavonoids	黄酮	Flavonols	黄酮醇	-	25384	26940	25948	9	9	4889	1.07747	0.00255964	0.0785734	0.0626916	-3.99558	down
Zmgp002857	UPLC-MS/MS	C33H40O20	Quercetin-3-O-α-rhamnosyl (1→2)-[α-rhamnosyl (1→6)]-β-glucoside	槲皮素-3-O-α-鼠李糖基(1→2)-[α-鼠李糖基(1→6)]-β-葡萄糖苷	Flavonoids	黄酮	Flavonols	黄酮醇	-	3444700	3346300	635210	378610	148310	355820	1.11058	0.140459	0.255421	0.118868	-3.07257	down
Zmmp003591	UPLC-MS/MS	C33H41O20+	Delphinidin-3-O-(2'''-O-p-coumaroyl)rutinoside	飞燕草素-3-O-(2'''-O-对香豆酰)芸香糖苷	Flavonoids	黄酮	Anthocyanidins	花青素	-	293520	139320	320040	9	9	9	1.32089	0.0468904	0.136311	3.58623e-05	-14.7672	down
pmn001505	UPLC-MS/MS	C41H64O13	Oleanolic acid-3-O-xylosyl(1→3)glucuronide	齐墩果酸-3-O-木糖基(1→3)葡萄糖醛酸苷	Terpenoids	萜类	Triterpene Saponin	三萜皂苷	-	14416000	6208700	11612000	58637	27614	9	1.09341	0.0469722	0.136311	0.00267583	-8.5458	down
HJAP119	UPLC-MS/MS	C34H42O20	Rhamnetin-3-O-Rutinoside-5-O-rhamnoside	鼠李素-3-O-芸香糖苷-5-O-鼠李糖苷	Flavonoids	黄酮	Flavonols	黄酮醇	-	363460	857040	1327800	3265900	4714900	4167300	1.19877	0.00513654	0.0909479	4.76714	2.25312	up
pmb0592	UPLC-MS/MS	C34H42O20	Chrysoeriol-7-O-rutinoside-5-O-glucoside	金圣草黄素-7-O-芸香糖苷-5-O-葡萄糖苷	Flavonoids	黄酮	Flavones	黄酮	-	380100	881580	1236800	3944300	5212300	6603800	1.23162	0.0206225	0.102135	6.308	2.65718	up
MWSHY0122	UPLC-MS/MS	C34H42O20	Typhaneoside	香蒲新苷	Flavonoids	黄酮	Flavones	黄酮	104472-68-6	308390	909030	1151700	3960800	4583200	4097300	1.20881	0.000587816	0.056056	5.33586	2.41572	up
HJN098	UPLC-MS/MS	C42H68O13	Azukisaponin I	赤豆皂苷 I	Terpenoids	萜类	Triterpene Saponin	三萜皂苷	82793-02-0	21964000	23277000	42971000	19317	20435	9	1.1694	0.0495023	0.140021	0.000450744	-11.1154	down
mws2190	UPLC-MS/MS	C42H68O13	Saikosaponin D	柴胡皂苷 D	Terpenoids	萜类	Triterpene	三萜	20874-52-6	18395	26354	905.88	9	9	9	1.25977	0.180331	0.300046	0.000591394	-10.7236	down
mws2188	UPLC-MS/MS	C42H68O13	Saikosaponin A	柴胡皂苷 A	Terpenoids	萜类	Triterpene	三萜	20736-09-8	48610	128660	6898.6	9	9	9	1.29363	0.227915	0.346539	0.000146605	-12.7358	down
Hmmp006067	UPLC-MS/MS	C42H68O13	Oleanolic acid-3-O-glucosyl(1→2)glucoside	齐墩果酸-3-O-葡萄糖基(1→2)葡萄糖苷	Terpenoids	萜类	Triterpene Saponin	三萜皂苷	-	452210	191430	123960	9	9	9	1.31895	0.124971	0.235909	3.51746e-05	-14.7951	down
pme2746	UPLC-MS/MS	C27H33N9O15P2	Riboflavin 5'-Adenosine Diphosphate	核黄素-5'-腺嘌呤二磷酸	Nucleotides and derivatives	核苷酸及其衍生物	Nucleotides and derivatives	核苷酸及其衍生物	146-14-5	172310	110650	208970	71988	94494	70916	1.13859	0.0890587	0.195728	0.482585	-1.05115	down
Hmcp001589	UPLC-MS/MS	C34H42O21	Isorhamnetin-3-O-rutinoside-4'-O-glucoside	异鼠李素-3-O-芸香糖苷-4'-O-葡萄糖苷	Flavonoids	黄酮	Flavonols	黄酮醇	111393-97-6	7968.2	19283	9355.4	168170	133710	122060	1.29124	0.00804338	0.092265	11.581	3.53368	up
Lmhp003162	UPLC-MS/MS	C34H42O21	Chrysoeriol-6,8-di-C-glucoside-4'-O-glucoside	金圣草黄素-6,8-二-C-葡萄糖苷-4'-O-葡萄糖苷	Flavonoids	黄酮	Flavonoid carbonoside	黄酮碳糖苷	-	9	9	6104	62134	40396	36585	1.08968	0.0248615	0.111998	22.7238	4.50613	up
pmb0620	UPLC-MS/MS	C34H42O21	Chrysoeriol-6,8-di-C-glucoside-7-O-glucoside	金圣草黄素-6,8-二-C-葡萄糖苷-7-O-葡萄糖苷	Flavonoids	黄酮	Flavones	黄酮	-	6105.2	3055.2	7433.5	56846	32298	25105	1.23696	0.0746499	0.173663	6.885	2.78346	up
Lmsp003790	UPLC-MS/MS	C34H42O21	Isorhamnetin-3-O-sophoroside-7-O-rhamnoside	异鼠李素-3-O-槐糖苷-7-O-鼠李糖苷	Flavonoids	黄酮	Flavonols	黄酮醇	41328-75-0	18396	71124	32743	1195300	1363500	852910	1.28813	0.0173898	0.0992405	27.9047	4.80244	up
mws1150	UPLC-MS/MS	C35H46O20	Echinacoside	松果菊苷	Phenolic acids	酚酸类	Phenolic acids	酚酸类	82854-37-3	9	4404	9	103740	135400	29288	1.13444	0.107202	0.21606	60.7028	5.92369	up
Cmdn004237	UPLC-MS/MS	C35H46O20	Betonyoside E	Betonyoside E	Phenolic acids	酚酸类	Phenolic acids	酚酸类	181301-30-4	8897.2	13394	5029.3	314000	328490	113320	1.27714	0.0727552	0.171268	27.6646	4.78997	up
Zmcp102720	UPLC-MS/MS	C47H76O17	Bupleurumwenchuanense	2''-O-β-D-吡喃木糖基-柴胡皂苷b2	Terpenoids	萜类	Triterpene Saponin	三萜皂苷	-	179710	194670	203850	9	9	9	1.32213	0.00132963	0.0585686	4.66942e-05	-14.3864	down
Zmcp102719	UPLC-MS/MS	C47H76O17	saikosaponin K	柴胡皂苷K	Terpenoids	萜类	Triterpene Saponin	三萜皂苷	-	222790	270200	256370	9	9	9	1.32202	0.0031609	0.0816337	3.60307e-05	-14.7604	down
Zmcp102716	UPLC-MS/MS	C47H76O17	Rotundifolioside A	圆叶柴胡果苷A	Terpenoids	萜类	Triterpene Saponin	三萜皂苷	-	205750	259850	265180	9	9	9	1.32191	0.00601932	0.092265	3.69468e-05	-14.7242	down
Zmcp102715	UPLC-MS/MS	C47H76O17	Rotundifolioside H	圆叶柴胡果苷H	Terpenoids	萜类	Triterpene Saponin	三萜皂苷	-	218070	215800	305600	9	9	9	1.3219	0.0140818	0.0986287	3.65126e-05	-14.7412	down
Hmmp005664	UPLC-MS/MS	C47H76O17	Akeboside Stf	木通皂苷 Stf	Terpenoids	萜类	Triterpene Saponin	三萜皂苷	-	27060	29730	50383	9	9	9	1.32073	0.0400392	0.125857	0.000251929	-11.9547	down
Lmsp004090	UPLC-MS/MS	C43H48O23	Isorhamnetin-3-O-(6''-O-p-coumarol)sophoroside-7-O-rhamnoside	异鼠李素-3-O-(6''-O-对香豆酰)槐糖苷-7-O-鼠李糖苷	Flavonoids	黄酮	Flavonols	黄酮醇	-	1722.5	5093.5	6810.8	98261	494880	106440	1.2478	0.222695	0.34093	51.3386	5.68197	up
Lmmn005092	UPLC-MS/MS	C47H72O20	Medicagenic acid-3-O-glucuronide-28-O-rhamnosyl(1,2)-arabinoside	苜蓿酸-3-O-葡萄糖醛酸苷-28-O-鼠李糖基(1,2)-阿拉伯糖苷	Terpenoids	萜类	Triterpene Saponin	三萜皂苷	-	371500	120700	205430	9	9	9	1.32013	0.0873862	0.193684	3.87025e-05	-14.6572	down
XMW0757	GC-MS	C18H36O2	Hexadecanoic acid, 15-methyl-, methyl ester	十六酸十五甲酯	Ester	酯	-	-	6929-04-0	3958.34	1572.37	3020.26	28618.7	24528.8	33859.9	1.28232	0.00740707	0.092265	10.1752	3.34698	up
KMW0719	GC-MS	C20H42	Eicosane	二十烷	Hydrocarbons	烃类	-	-	112-95-8	9412.6	6588.66	12656	27023.9	22516.7	17491.3	1.1704	0.0235621	0.110494	2.33909	1.22595	up
XMW0958	GC-MS	C11H23I	1-Iodoundecane	1-碘十一烷	Hydrocarbons	烃类	-	-	4282-44-4	348199	514348	447042	1.12427e+06	903175	1.10768e+06	1.26723	0.00335004	0.0838222	2.39398	1.25941	up
XMW0755	GC-MS	C20H32	m-Camphorene	间樟脑	Terpenoids	萜类	-	-	20016-73-3	13498.1	17669.5	35440.7	78341.7	46309.6	57382.5	1.1302	0.0337509	0.118781	2.7329	1.45043	up
XMW0017	GC-MS	C17H34O2	Hexadecanoic acid, methyl ester	十六酸甲酯	Ester	酯	-	-	112-39-0	4126.97	1579.91	3199.23	28042.9	24420.5	33744.6	1.2775	0.00740112	0.092265	9.67966	3.27496	up
KMW0713	GC-MS	C17H28O2	2,6,10-Dodecatrien-1-ol, 3,7,11-trimethyl-, acetate, (E,E)-	（E，E）-醋酸法呢酯	Ester	酯	-	-	4128-17-0	28091.2	22928.7	30516.2	9	9	9	1.32208	0.00671278	0.092265	0.000331141	-11.5603	down
WMW0203	GC-MS	C16H30O2	Palmitoleic Acid	棕榈油酸	Acid	酸	-	-	373-49-9	16448.7	13226.1	29228.3	57906.8	40212.5	37076.6	1.11847	0.0388132	0.124174	2.29522	1.19864	up
XMW1491	GC-MS	C16H28O2	Lavandulyl caproate	辛酸癸酸	Acid	酸	-	-	59550-36-6	383141	412384	834082	930257	1.87997e+06	940350	1.02859	0.140204	0.255421	2.30152	1.20259	up
NMW0333	GC-MS	C15H21NO2	Meperidine	哌替啶	Heterocyclic compound	杂环化合物	-	-	57-42-1	7001.49	6550.89	11821.1	19606.8	16734.8	14603.6	1.15107	0.0193603	0.100137	2.00781	1.00562	up
D130	GC-MS	C16H16O2	Benzeneacetic acid, 2-phenylethyl ester	苯乙酸2-苯乙基酯	Ester	酯	-	-	102-20-5	9	9	9	16315	27043	15188	1.32077	0.035523	0.120117	2168.37	11.0824	up
NMW0362	GC-MS	C17H21N	BenzphetAmine	苯丙胺	Amine	胺	-	-	156-08-1	103113	88037.8	158235	280934	239658	221563	1.18954	0.00989129	0.0967806	2.12417	1.0869	up
D441	GC-MS	C15H26O2	Butanoic acid, 3-methyl-, 3,7-dimethyl-2,6-octadienyl ester, (Z)-	异戊酸内酯	Ester	酯	-	-	3915-83-1	175719	230256	133499	361812	527946	462174	1.2235	0.0142986	0.0986287	2.50602	1.3254	up
XMW1264	GC-MS	C15H26O2	Acetic acid, 1-methyl-3-(2,6,6-trimethylcyclohex-1-enyl)propyl ester	4-（2,6,6-三甲基环己烯-1-基）丁烷-2-基乙酸酯	Ester	酯	-	-	86756-12-9	339180	446586	466752	1.44903e+06	2.91791e+06	2.10205e+06	1.27392	0.0536983	0.14456	5.16478	2.36871	up
KMW0638	GC-MS	C15H26O2	Geranyl isovalerate	异戊酸香叶基酯	Ester	酯	-	-	109-20-6	360372	295462	390633	1.50633e+06	2.58321e+06	2.25321e+06	1.2945	0.0302244	0.113987	6.0611	2.59958	up
XMW1441	GC-MS	C12H15N3S	Thiazol-2-Amine, N-(4-dimethylaminobenzyl)-	N-（4-二甲基氨基苄基）-噻唑-2-胺	Amine	胺	-	-	13159-95-0	7722.2	8822.76	18716.7	39280.9	21914.9	19701.7	1.02901	0.117372	0.22764	2.2942	1.19799	up
XMW0159	GC-MS	C16H34	2,6,10-Trimethyltridecane	2,6,10-三甲基十三烷	Hydrocarbons	烃类	-	-	3891-99-4	805396	823955	797689	3.79413e+06	4.44259e+06	5.42366e+06	1.31233	0.0156071	0.0986287	5.62841	2.49273	up
KMW0585	GC-MS	C14H26O2	Citronellyl isobutyrate	异丁酸香茅酯	Ester	酯	-	-	97-89-2	1.27306e+06	1.24092e+06	2.08157e+06	7.31621e+06	1.09989e+07	7.16508e+06	1.28146	0.0263692	0.111998	5.54454	2.47107	up
D314	GC-MS	C14H26O2	8-Dodecen-1-ol, acetate, (Z)-	（Z）-8-十二烯-1-醇乙酸酯	Ester	酯	-	-	28079-04-1	281342	233849	315935	1.0997e+06	1.6023e+06	1.51468e+06	1.30006	0.0165481	0.0992405	5.07345	2.34297	up
XMW1308	GC-MS	C10H17F3O2	1-Octyl trifluoroacetate	1-辛基三氟乙酸酯	Ester	酯	-	-	2561-21-9	685839	1.22307e+06	1.52246e+06	5.02897e+06	3.87753e+06	6.1414e+06	1.24562	0.0175067	0.0992405	4.38539	2.13271	up
XMW0916	GC-MS	C11H15Br	(5-bromopentyl)-Benzene,	（5-溴戊基）-苯	Halogenated hydrocarbons	卤代烃	-	-	14469-83-1	2.96712e+06	2.95582e+06	4.86568e+06	2.25519e+07	3.2063e+07	2.08403e+07	1.29223	0.0222981	0.106815	6.99397	2.80611	up
KMW0591	GC-MS	C14H24O2	Butanoic acid, 1,7,7-trimethylbicyclo[2.2.1]hept-2-yl ester, endo-	丁酸冰片酯	Ester	酯	-	-	13109-70-1	124887	79580.8	84675.8	839163	1.74657e+06	3.08724e+06	1.27115	0.110742	0.220002	19.6199	4.29424	up
D246	GC-MS	C14H24O2	Propanoic acid, 2-methyl-, 3,7-dimethyl-2,6-octadienyl ester, (Z)-	[（2Z）-3,7-二甲基辛基-2,6-二烯基] 2-甲基丙酸酯	Ester	酯	-	-	2345-24-6	3.53928e+06	2.30208e+06	2.32612e+06	1.41077e+07	4.6629e+07	8.02785e+07	1.22441	0.14626	0.262209	17.2654	4.10982	up
KMW0647	GC-MS	C13H20O3	Methyl jasmonate	茉莉酸甲酯	Ester	酯	-	-	1211-29-6	74414.5	74431.8	157725	215194	401910	182319	1.07315	0.124422	0.23548	2.60763	1.38274	up
D241	GC-MS	C15H26O	3-Cyclohexene-1-methanol, .alpha.,4-dimethyl-.alpha.-(4-methyl-3-pentenyl)-, [R-(R*,R*)]-	[R-（R *，R *）]-α，4-二甲基-α-（4-甲基-3-戊烯基）-3-环己烯-1-甲醇	Terpenoids	萜类	-	-	23178-88-3	399230	444596	502813	2.05714e+06	4.85648e+06	3.47194e+06	1.2795	0.0648086	0.159295	7.7122	2.94714	up
KMW0652	GC-MS	C15H26O	Cubenol	（-）-小茴香酚	Phenol	酚	-	-	21284-22-0	143356	258331	284169	505266	711464	470720	1.16781	0.0276522	0.111998	2.46036	1.29887	up
KMW0671	GC-MS	C15H26O	(1R,4R)-1-methyl-4-(6-Methylhept-5-en-2-yl)cyclohex-2-enol	姜油烯醇	Alcohol	醇	-	-	58334-55-7	459536	418464	559966	2.20298e+06	5.23538e+06	3.76224e+06	1.27694	0.0650392	0.159642	7.7892	2.96148	up
KMW0656	GC-MS	C15H26O	2-Naphthalenemethanol, decahydro-.alpha.,.alpha.,4a-trimethyl-8-methylene-, [2R-(2.alpha.,4a.alpha.,8a.beta.)]-	β-乙醛	Terpenoids	萜类	-	-	473-15-4	2478.99	3911.07	6875.57	13831.4	34825.5	16213.4	1.17602	0.117242	0.22764	4.8901	2.28986	up
XMW0854	GC-MS	C15H26O	4a(2H)-Naphthalenol, 1,3,4,5,6,8a-hexahydro-4,7-dimethyl-1-(1-methylethyl)-, (1S,4S,4aS,8aR)-	（1S，4S，4aS，8aR）-1,3,4,5,6,8a-六氢-4,7-二甲基-1-（1-甲基乙基）-4a（2H）-萘	Terpenoids	萜类	-	-	73365-77-2	485450	465884	554292	1.93169e+06	3.7936e+06	2.95803e+06	1.28593	0.0467782	0.136311	5.76725	2.52788	up
WMW0149	GC-MS	C15H26O	Cedrol	雪松	Terpenoids	萜类	-	-	77-53-2	484697	286571	579344	1.34018e+06	1.58961e+06	1.76424e+06	1.24407	0.00268805	0.0785734	3.47548	1.79721	up
XMW1017	GC-MS	C16H28	1,E-11,Z-13-Hexadecatriene	Z-13-十六碳三烯-E-11-1	Hydrocarbons	烃类	-	-	80634-97-5	562956	591290	739188	2.16949e+06	4.40901e+06	3.25795e+06	1.27467	0.0538356	0.14456	5.19503	2.37713	up
XMW1167	GC-MS	C15H24O	(1R,3E,7E,11R)-1,5,5,8-Tetramethyl-12-oxabicyclo[9.1.0]dodeca-3,7-diene	（1R，3E，7E，11R）-1,5,5,8-四甲基-12-氧杂双环[9.1.0]十二烷基-3,7-二烯	Terpenoids	萜类	-	-	19888-34-7	334036	247665	346405	1.39703e+06	1.98845e+06	2.01119e+06	1.29942	0.015948	0.0987791	5.81471	2.53971	up
D337	GC-MS	C15H24O	2H-2a,7-Methanoazuleno[5,6-b]oxirene, octahydro-3,6,6,7a-tetramethyl-	α-雪松烯环氧化物	Terpenoids	萜类	-	-	29597-36-2	26788.9	23330.3	43694.3	88031.7	152419	111506	1.23842	0.034011	0.118781	3.75166	1.90753	up
XMW0054	GC-MS	C15H24O	Farnesene epoxide, E-	E-法呢烯环氧化物	Terpenoids	萜类	-	-	83637-40-5	273058	326651	391800	1.30351e+06	2.77121e+06	1.99101e+06	1.27592	0.0565854	0.148069	6.11767	2.61298	up
KMW0636	GC-MS	C15H24O	1H-3a,7-Methanoazulen-5-ol, octahydro-3,8,8-trimethyl-6-methylene-	雪松醇	Alcohol	醇	-	-	28231-03-0	343017	272350	457970	1.43233e+06	1.90067e+06	1.93651e+06	1.28913	0.00790293	0.092265	4.90947	2.29557	up
D428	GC-MS	C15H24O	6-Methyl-2-(4-methylcyclohex-3-en-1-yl)hepta-1,5-dien-4-ol	6-甲基-2-（4-甲基环己-3-烯-1-基）庚-1,5-二烯-4-醇	Terpenoids	萜类	-	-	38142-56-2	733147	616140	1.04218e+06	2.88021e+06	3.45302e+06	3.36334e+06	1.28706	0.000625648	0.056056	4.05465	2.01958	up
D254	GC-MS	C15H24O	2H-2,4a-Methanonaphthalen-8(5H)-one, 1,3,4,6,7,8a-hexahydro-1,1,5,5-tetramethyl-	1，1,3,4,6,7,8a-六氢-1,1,5,5-四甲基-2H-2,4a-甲烷萘-8（5H）酮	Terpenoids	萜类	-	-	23787-90-8	140539	125696	228396	737503	1.36637e+06	964319	1.27262	0.0395129	0.124794	6.20301	2.63297	up
NMW0247	GC-MS	C15H22O	Furan, 3-(4,8-dimethyl-3,7-nonadienyl)-, (E)-	（E）-3-（4,8-二甲基-3,7-壬二烯基）-呋喃	Terpenoids	萜类	-	-	23262-34-2	24574.8	30522.3	56060.4	94904.7	139293	113780	1.20457	0.00966803	0.0967806	3.1305	1.64639	up
XMW0754	GC-MS	C15H22O	Methanol, (cyclohexyl)(2,3-dimethylphenyl)-	（环己基）（2,3-二甲基苯基）-甲醇	Alcohol	醇	-	-	349498-47-1	44496.8	39771.2	73801.7	128291	109629	91598.7	1.15331	0.019009	0.100137	2.08464	1.0598	up
w44	GC-MS	C11H20O4	Butanoic acid, 2-butoxy-1-methyl-2-oxoethyl ester	丁酸2-丁氧基-1-甲基-2-氧乙酯	Ester	酯	-	-	7492-70-8	45788.7	14466.1	19995.7	214624	362092	169181	1.24293	0.0588983	0.1523	9.29459	3.21639	up
D204	GC-MS	C13H26O2	Pentyl octanoate	辛酸戊酯	Ester	酯	-	-	638-25-5	233178	164302	152833	695379	3.06163e+06	5.27726e+06	1.18455	0.165943	0.284337	16.4166	4.03708	up
XMW1345	GC-MS	C13H26O2	Octanoic acid, 3-methylbutyl ester	3-甲基丁酯辛酸	Ester	酯	-	-	2035-99-6	884534	909012	821041	4.71175e+06	5.59822e+06	6.90567e+06	1.31214	0.0165814	0.0992405	6.58446	2.71906	up
XMW1242	GC-MS	C12H22O3	Hexanoic acid, anhydride	己酸己酯	Ester	酯	-	-	2051-49-2	13147.2	11463	33910.2	36676.3	40464.8	42691.6	1.02116	0.0979552	0.206895	2.04771	1.03401	up
KMW0640	GC-MS	C14H28O	Tetradecanal	十四烷基醛	Aldehyde	醛	-	-	124-25-4	27188	24648.7	33735.6	109549	130596	135576	1.30625	0.00341027	0.0838222	4.39068	2.13445	up
D354	GC-MS	C13H22O2	3-Cyclohexene-1-carboxAldehyde, 4-(4-hydroxy-4-methylpentyl)-	4-（4-羟基-4-甲基戊基）-3-环己烯-1-甲醛	Aldehyde	醛	-	-	31906-04-4	1.10077e+06	918571	1.04359e+06	3.53192e+06	7.15791e+06	4.87563e+06	1.27687	0.0585029	0.151529	5.08189	2.34536	up
XMW1113	GC-MS	C9H20FO2P	2-Octyl methylphosphonofluoridate	2-辛基甲基氟膦酸酯	Ester	酯	-	-	22925-97-9	13624.2	17677.4	15626.6	134187	125270	104043	1.31606	0.00638114	0.092265	7.74589	2.95343	up
KMW0639	GC-MS	C13H20O2	3-Buten-2-one, 4-(2,2,6-trimethyl-7-oxabicyclo[4.1.0]hept-1-yl)-	环氧-β-紫罗兰酮	Terpenoids	萜类	-	-	23267-57-4	96215.3	72160.6	67131.2	3.49183e+06	1.38636e+06	2.23818e+06	1.30272	0.0642658	0.15883	30.2172	4.9173	up
NMW0258	GC-MS	C12H17NO2	Fenobucarb	异丁威	Ester	酯	-	-	3766-81-2	461758	344245	598788	1.72092e+06	2.19611e+06	2.20172e+06	1.28387	0.00376022	0.0841302	4.35562	2.12288	up
D216	GC-MS	C14H22O	.alpha.-Irone	甲基Α-紫罗兰酮	Ketone	酮	-	-	79-69-6	3.0892e+07	3.7018e+07	3.67886e+07	1.01935e+08	5.67469e+07	8.45262e+07	1.20855	0.0693503	0.16566	2.32294	1.21595	up
D352	GC-MS	C14H22O	2-Butenal, 2-methyl-4-(2,6,6-trimethyl-1-cyclohexen-1-yl)-	2-甲基-4-（2,6,6-三甲基-1-环己烯-1-基）-2-丁烯醛	Aldehyde	醛	-	-	3155-71-3	196752	203779	238200	523042	862977	718731	1.27678	0.0363945	0.1212	3.2952	1.72037	up
XMW0473	GC-MS	C13H18O2	Benzoic acid, hexyl ester	苯甲酸己酯	Ester	酯	-	-	6789-88-4	102889	136583	173939	353684	654060	515989	1.24393	0.044462	0.133042	3.68576	1.88196	up
NMW0265	GC-MS	C13H18O2	Ibuprofen	布洛芬	Acid	酸	-	-	15687-27-1	482617	751324	552962	1.41816e+06	2.90635e+06	2.15243e+06	1.23377	0.0633474	0.157661	3.62467	1.85785	up
XMW0040	GC-MS	C12H14O3	Phenol, 2-methoxy-4-(1-propenyl)-, acetate	乙酸异丁香酚酯	Ester	酯	-	-	93-29-8	123796	111564	204683	625393	1.0682e+06	762955	1.27205	0.0308285	0.114844	5.58252	2.48092	up
KMW0566	GC-MS	C15H24	(4aR-trans)-decahydro-4a-methyl-1-methylene-7-(1-methylethylidene)-Naphthalene	γ-芹子烯	Terpenoids	萜类	-	-	515-17-3	276170	255437	266651	5.99954e+06	3.15476e+06	5.2338e+06	1.30967	0.0334382	0.118781	18.0244	4.17188	up
D300	GC-MS	C15H24	Aristolochene	马兜铃属	Terpenoids	萜类	-	-	26620-71-3	2.37561e+06	2.26725e+06	3.91992e+06	1.41946e+07	2.39698e+07	1.57551e+07	1.28025	0.0345682	0.119505	6.29696	2.65465	up
GMW0078	GC-MS	C15H24	.beta.-Bisabolene	β-红没药烯	Terpenoids	萜类	-	-	495-61-4	1.76357e+07	2.21775e+07	2.4049e+07	5.53824e+07	3.57889e+07	4.53979e+07	1.22247	0.0391865	0.124475	2.1385	1.0966	up
XMW0743	GC-MS	C15H24	(-)-Aristolene	（-）-马兜铃烯	Terpenoids	萜类	-	-	6831-16-9	2.02078e+07	2.07775e+07	2.1004e+07	1.04716e+08	1.20597e+08	1.46866e+08	1.31389	0.0138104	0.0986287	6.00392	2.58591	up
XMW0549	GC-MS	C15H24	(1S,4aR,7R)-1,4a-Dimethyl-7-(prop-1-en-2-yl)-1,2,3,4,4a,5,6,7-octahydronaphthalene	（1S，4aR，7R）-1,4a-二甲基-7-（丙烯基）-1,2,3,4,4a，5,6,7-八氢萘	Terpenoids	萜类	-	-	52026-55-8	3.74731e+06	3.92554e+06	3.61181e+06	2.17057e+07	2.5816e+07	3.14471e+07	1.31357	0.0152271	0.0986287	6.99789	2.80692	up
XMW0182	GC-MS	C15H24	(3S,3aS,6R,8aS)-3,8,8-Trimethyl-7-methyleneoctahydro-1H-3a,6-methanoazulene	吡嗪烯	Terpenoids	萜类	-	-	31145-21-8	3.31243e+07	3.42726e+07	3.09405e+07	1.88715e+08	2.25597e+08	2.66844e+08	1.31429	0.013099	0.0986287	6.92674	2.79218	up
XMW0469	GC-MS	C15H24	(1R,3aS,8aS)-7-Isopropyl-1,4-dimethyl-1,2,3,3a,6,8a-hexahydroazulene	愈创木6,9-二烯	Terpenoids	萜类	-	-	36577-33-0	2.02078e+07	2.07791e+07	2.10022e+07	1.04716e+08	1.20405e+08	1.46242e+08	1.31407	0.013477	0.0986287	5.99077	2.58274	up
WMW0012	GC-MS	C15H24	(+)-epi-Bicyclosesquiphellandrene	（+）-表-双环倍半萜类烯	Terpenoids	萜类	-	-	54274-73-6	2.97731e+06	2.6982e+06	4.91273e+06	1.78965e+07	1.5341e+07	1.26702e+07	1.27236	0.00711011	0.092265	4.33572	2.11627	up
D353	GC-MS	C15H24	(S,1Z,6Z)-8-Isopropyl-1-methyl-5-methylenecyclodeca-1,6-diene	（1Z，6Z，8S）-1-甲基-5-亚甲基-8-丙-2-基环癸-1,6-二烯	Terpenoids	萜类	-	-	317819-80-0	2.26722e+07	2.26702e+07	2.72807e+07	1.11431e+08	1.1919e+08	1.44138e+08	1.31235	0.00824983	0.092265	5.16032	2.36746	up
WMW0052	GC-MS	C15H24	(E)-1-Methyl-4-(6-methylhept-5-en-2-ylidene)cyclohex-1-ene	（E）-1-甲基-4-（6-甲基庚-5-烯-2-亚烷基）环己-1-烯	Terpenoids	萜类	-	-	53585-13-0	2.216e+07	3.34434e+07	2.86714e+07	7.72096e+07	6.03171e+07	7.5648e+07	1.26632	0.00474883	0.0881501	2.52952	1.33886	up
D338	GC-MS	C15H24	1-methyl-4-(1,2,2-trimethylcyclopentyl)cyclohexa-1,3-diene	1-甲基-4-(1,2,2-三甲基环戊基)环己-1,3-二烯	Terpenoids	萜类	-	-	29621-78-1	1.46553e+08	1.61307e+08	2.00971e+08	4.41459e+08	2.66004e+08	3.62576e+08	1.19387	0.055091	0.14573	2.10293	1.0724	up
KMW0597	GC-MS	C15H24	.gamma.-Muurolene	γ-茂丁烯	Terpenoids	萜类	-	-	30021-74-0	5.33744e+06	1.04673e+07	7.28103e+06	2.12834e+07	3.70374e+07	5.12009e+07	1.22051	0.0753238	0.174775	4.74411	2.24614	up
XMW0142	GC-MS	C15H24	3a,7-Methano-3aH-cyclopentacyclooctene, 1,4,5,6,7,8,9,9a-octahydro-1,1,7-trimethyl-, [3aR-(3a.alpha.,7.alpha.,9a.beta.)]-	（-）-丁香三环烯	Terpenoids	萜类	-	-	469-92-1	729473	969462	1.50343e+06	6.28365e+06	1.8116e+06	3.3087e+06	1.08473	0.169625	0.288911	3.5611	1.83232	up
KMW0509	GC-MS	C15H24	Cyclohexene, 4-ethenyl-4-methyl-3-(1-methylethenyl)-1-(1-methylethyl)-, (3R-trans)-	δ-榄香烯	Terpenoids	萜类	-	-	20307-84-0	34765.6	25687.7	74788.9	112943	201976	111424	1.1244	0.0639441	0.158262	3.15244	1.65647	up
XMW0825	GC-MS	C15H24	Bicyclo[3.1.1]heptane, 6-methyl-2-methylene-6-(4-methyl-3-pentenyl)-, [1R-(1.alpha.,5.alpha.,6.beta.)]-	[1R-（1α，5α，6β）]-6-甲基-2-亚甲基-6-（4-甲基-3-戊烯基）-双环[3.1.1]庚烷	Terpenoids	萜类	-	-	55123-21-2	1.48069e+07	1.51891e+07	1.39026e+07	8.19099e+07	9.6014e+07	1.16634e+08	1.31382	0.014151	0.0986287	6.70997	2.74631	up
KMW0622	GC-MS	C15H24	Cyclohexene, 3-(1,5-dimethyl-4-hexenyl)-6-methylene-, [S-(R*,S*)]-	β-倍半萜类烯	Terpenoids	萜类	-	-	20307-83-9	1.90067e+06	1.22829e+06	2.82477e+06	8.57505e+06	1.02692e+07	1.09293e+07	1.26363	0.0013579	0.0585686	5.00081	2.32216	up
KMW0614	GC-MS	C15H24	Cubenene	卡丁二烯	Terpenoids	萜类	-	-	29837-12-5	1.27441e+07	1.90914e+07	1.65277e+07	4.34238e+07	3.46282e+07	4.36557e+07	1.26793	0.00419008	0.0864396	2.51654	1.33144	up
KMW0210	GC-MS	C15H24	1H-Cyclopenta[1,3]cyclopropa[1,2]benzene, octahydro-7-methyl-3-methylene-4-(1-methylethyl)-, [3aS-(3a.alpha.,3b.beta.,4.beta.,7.alpha.,7aS*)]-	β-立方萜类烯	Terpenoids	萜类	-	-	13744-15-5	21023.9	20852.3	19967.3	50153.3	65821.7	159492	1.17534	0.172274	0.291264	4.45427	2.15519	up
KMW0603	GC-MS	C15H24	Germacrene D	大根香叶烯D	Terpenoids	萜类	-	-	23986-74-5	5.34491e+06	1.04673e+07	7.244e+06	2.09555e+07	3.70359e+07	5.11907e+07	1.21793	0.0774321	0.178967	4.73547	2.24351	up
D293	GC-MS	C15H24	Cyclohexene, 4-[(1E)-1,5-dimethyl-1,4-hexadien-1-yl]-1-methyl-	4-[（（1E）-1,5-二甲基-1,4-己二-1-基] -1-甲基-环己烯	Terpenoids	萜类	-	-	25532-79-0	7.64753e+07	9.20041e+07	1.06065e+08	2.49132e+08	1.48701e+08	2.04216e+08	1.20254	0.0542759	0.144645	2.1929	1.13284	up
WMW0053	GC-MS	C15H24	Benzene, 1-(1,5-dimethylhexyl)-4-methyl-	1-（1,5-二甲基己基）-4-甲基-苯	Terpenoids	萜类	-	-	1461-02-5	1.48808e+07	1.52974e+07	1.53051e+07	8.22379e+07	9.64702e+07	1.12275e+08	1.3157	0.0110361	0.0986287	6.39758	2.67753	up
KMW0556	GC-MS	C15H24	Naphthalene, decahydro-4a-methyl-1-methylene-7-(1-methylethenyl)-, [4aR-(4a.alpha.,7.alpha.,8a.beta.)]-	β-芹子烯	Terpenoids	萜类	-	-	17066-67-0	581329	590826	979376	3.72983e+06	5.92093e+06	3.69881e+06	1.28197	0.0333068	0.118781	6.20468	2.63336	up
KMW0478	GC-MS	C15H24	cis-.beta.-Farnesene	（Z）-β-法呢烯	Terpenoids	萜类	-	-	28973-97-9	4.79859e+06	4.89925e+06	4.65956e+06	2.22845e+07	2.69815e+07	3.3588e+07	1.30955	0.0199634	0.101539	5.77082	2.52878	up
XMW0975	GC-MS	C15H24	4-(1,5-dimethyl-1,4-hexadienyl)-1-methyl-Cyclohexene	4-（1,5-二甲基-1,4-己二烯基）-1-甲基-环己烯	Terpenoids	萜类	-	-	17627-44-0	7.6721e+07	9.20886e+07	1.06655e+08	2.51269e+08	1.49232e+08	2.04302e+08	1.20123	0.0554045	0.146052	2.19557	1.1346	up
XMW0742	GC-MS	C15H24	10,10-Dimethyl-2,6-dimethylenebicyclo[7.2.0]undecane	10,10-二甲基-2,6-二亚甲基双环[7.2.0]十一烷	Terpenoids	萜类	-	-	357414-37-0	1.98756e+07	2.00036e+07	2.23619e+07	9.93776e+07	1.10784e+08	1.33513e+08	1.31382	0.0108588	0.0986287	5.52167	2.4651	up
D345	GC-MS	C14H20O	(3aR,6R,8aR)-7,7-Dimethyl-8-methylenehexahydro-1H-3a,6-methanoazulen-3(2H)-one	（3aR，6R，8aR）-7,7-二甲基-8-亚甲基六氢-1H-3a，6-甲磺腈-3（2H）-酮	Ester	酯	-	-	30557-76-7	716122	597025	963489	2.70356e+06	3.37213e+06	3.25826e+06	1.29078	0.00202107	0.072031	4.09988	2.03558	up
XMW0552	GC-MS	C13H16O2	2,2'-Isopropylidenebis(5-methylfuran)	2,2'-异亚丙基双（5-甲基呋喃）	Heterocyclic compound	杂环化合物	-	-	59212-75-8	1.00135e+07	1.04056e+07	9.92103e+06	6.01846e+07	7.10731e+07	8.56495e+07	1.31473	0.0137521	0.0986287	7.14917	2.83778	up
WMW0059	GC-MS	C13H16O2	E-2-Hexenyl benzoate	E-2-己烯基苯甲酸酯	Ester	酯	-	-	76841-70-8	109291	132147	199939	353684	653794	515559	1.2248	0.0429884	0.130726	3.45065	1.78687	up
D327	GC-MS	C15H22	(4R,4aR)-4,4a-Dimethyl-6-(prop-1-en-2-yl)-1,2,3,4,4a,7-hexahydronaphthalene	（4R，4aR）-4,4a-二甲基-6-（丙-1-烯-2-基）-1,2,3,4,4a，7-六氢萘	Terpenoids	萜类	-	-	28908-26-1	61431.8	71172.1	68739.3	203082	107392	149309	1.195	0.0880624	0.194217	2.28358	1.1913	up
KMW0620	GC-MS	C15H22	Benzene, 1-(1,5-dimethyl-4-hexenyl)-4-methyl-	α-姜黄素	Terpenoids	萜类	-	-	644-30-4	1.87274e+06	1.79781e+06	3.08792e+06	1.22146e+07	2.05816e+07	1.34204e+07	1.28382	0.0344216	0.119337	6.83833	2.77364	up
XMW0227	GC-MS	C15H22	aR-Himachalene	aR-雪松烯	Terpenoids	萜类	-	-	19419-67-1	59473.3	65975.5	65748.4	203475	107630	149741	1.21068	0.0826167	0.187307	2.41032	1.26922	up
XMW0262	GC-MS	C15H22	1,1,7,7a-Tetramethyl-1a,2,6,7,7a,7b-hexahydro-1H-cyclopropa[a]naphthalene	1,1,7,7a-四甲基-1a，2,6,7,7a，7b-六氢-1H-环丙烷[a]萘	Terpenoids	萜类	-	-	154098-14-3	225983	214828	262442	1.25262e+06	1.39162e+06	1.66262e+06	1.31333	0.00913421	0.0963146	6.1242	2.61452	up
XMW0386	GC-MS	C15H22	cis-Calamenene	顺式卡拉曼烯	Terpenoids	萜类	-	-	72937-55-4	263852	278111	288919	789740	487252	655209	1.2498	0.0514847	0.141877	2.32548	1.21753	up
D310	GC-MS	C15H22	(8R,8aS)-8,8a-Dimethyl-2-(propan-2-ylidene)-1,2,3,7,8,8a-hexahydronaphthalene	（8R，8aS）-8,8a-二甲基-2-（丙烷-2-亚烷基）-1,2,3,7,8,8a-六氢萘	Terpenoids	萜类	-	-	27840-40-0	266097	312904	336588	1.04122e+06	533267	730734	1.2021	0.0857914	0.191163	2.51775	1.33213	up
XMW0155	GC-MS	C13H13NO	5-Phenyl-o-anisidine	5-苯基邻茴香胺	Amine	胺	-	-	39811-17-1	9728.15	6092.26	16109.4	56457.8	19594.3	107340	1.07614	0.184106	0.302376	5.7436	2.52196	up
XMW0422	GC-MS	C14H30	3,5-Dimethyldodecane	3,5-二甲基十二烷	Hydrocarbons	烃类	-	-	107770-99-0	10273	7925.3	13387.5	144046	120644	137325	1.31132	0.00212241	0.0722192	12.7277	3.6699	up
KMW0598	GC-MS	C13H26O	Tridecanal	十三烷醛	Aldehyde	醛	-	-	10486-19-8	3.02767e+06	3.15552e+06	4.16001e+06	9.17352e+06	5.63214e+06	7.4825e+06	1.20317	0.0475894	0.137224	2.15486	1.1076	up
XMW0394	GC-MS	C14H14O	Phenol, 4-(1-phenylethyl)-	4-（1-苯乙基）-苯酚	Phenol	酚	-	-	1988-89-2	38290.7	23287.2	56349.8	94892.3	79800.5	65749.9	1.0681	0.0334307	0.118781	2.0389	1.02779	up
XMW1179	GC-MS	C8H16Cl2O	Butane, 1,1'-oxybis[4-chloro-	双（4-氯丁基）醚	Halogenated hydrocarbons	卤代烃	-	-	6334-96-9	9	9	48304.3	181350	86776.2	240130	1.01441	0.0618476	0.156108	10.518	3.39479	up
XMW1260	GC-MS	C13H24O	1-Cyclohexene-1-propanol, .alpha.,2,6,6-tetramethyl-	α，2,6,6-四甲基-1-环己烯-1-丙醇	Alcohol	醇	-	-	3293-47-8	2.0009e+06	2.03211e+06	1.87139e+06	1.21016e+07	1.44593e+07	1.76258e+07	1.31379	0.015298	0.0986287	7.48368	2.90375	up
NMW0142	GC-MS	C12H20O2	Cyclohexanol, 1-methyl-4-(1-methylethylidene)-, acetate	1-甲基-4-（1-甲基亚乙基）-环己醇乙酸酯	Ester	酯	-	-	10235-63-9	9	9	9	45963.7	66499.4	43218.5	1.32161	0.0194606	0.100137	5765.98	12.4934	up
KMW0518	GC-MS	C12H20O2	2,6-Octadien-1-ol, 3,7-dimethyl-, acetate, (Z)-	乙酸橙花酯	Ester	酯	-	-	141-12-8	53424.9	55786.5	73219.3	201391	94448.4	156775	1.15445	0.0955719	0.203666	2.48102	1.31093	up
KMW0501	GC-MS	C12H20O2	Dihydrocarvyl acetate	乙酸二氢戊酯	Ester	酯	-	-	20777-49-5	75017.7	56206.6	23095	372087	2.57492e+06	1.49419e+06	1.21686	0.153596	0.270729	28.7793	4.84696	up
XMW0961	GC-MS	C12H20O2	Bornyl acetate	乙酸龙脑酯	Ester	酯	-	-	76-49-3	54214.1	54937.5	85448	720207	572406	764670	1.30813	0.00720764	0.092265	10.5719	3.40216	up
WMW0219	GC-MS	C12H20O2	Isobornyl acetate	乙酸异冰片酯	Ester	酯	-	-	125-12-2	47977.4	44686.9	75394.7	712419	551470	737352	1.30718	0.00763652	0.092265	11.908	3.57385	up
WMW0175	GC-MS	C12H20O2	.delta.-Terpineol, acetate	δ-松油醇，醋酸盐	Terpenoids	萜类	-	-	93836-50-1	433132	568637	358199	83074.1	35777.6	97966.3	1.2449	0.0181457	0.0992405	0.159429	-2.64902	down
WMW0016	GC-MS	C12H20O2	(-)-Bornyl acetate	（-）-乙酸龙脑酯	Terpenoids	萜类	-	-	5655-61-8	54022	53074.4	85448	724181	572097	741750	1.30767	0.00599167	0.092265	10.5847	3.40391	up
XMW0803	GC-MS	C12H20O2	Iso-3-thujyl acetate	异-3-叔丁基乙酸酯	Ester	酯	-	-	62181-90-2	73692.6	44651.4	148513	456178	691365	512833	1.23326	0.0119629	0.0986287	6.22198	2.63737	up
WMW0089	GC-MS	C13H22O	5,9-Undecadien-2-one, 6,10-dimethyl-	6,10-二甲基-5,9-十一碳烯-2-酮	Ketone	酮	-	-	689-67-8	1.23823e+07	1.27673e+07	1.15279e+07	6.37558e+07	7.62928e+07	8.60415e+07	1.31524	0.0100927	0.0967806	6.16427	2.62393	up
KMW0563	GC-MS	C13H22O	5,9-Undecadien-2-one, 6,10-dimethyl-, (E)-	（E）-6,10-二甲基-5,9-十一碳烯-2-酮	Ketone	酮	-	-	3796-70-1	1.23819e+07	1.27544e+07	1.1528e+07	6.37558e+07	7.62928e+07	8.56659e+07	1.3154	0.00980957	0.0967806	6.15626	2.62205	up
XMW0198	GC-MS	C13H22O	3-Buten-2-ol, 4-(2,6,6-trimethyl-2-cyclohexen-1-yl)-, (3E)-	（3E）-4-（2,6,6-三甲基-2-环己烯-1-基）-3-丁烯-2-醇	Alcohol	醇	-	-	25312-34-9	6.02293e+06	6.19751e+06	5.83226e+06	3.35206e+07	3.99058e+07	4.87752e+07	1.3132	0.0158045	0.0986287	6.76916	2.75898	up
XMW0951	GC-MS	C12H18O2	2-Cyclohexen-1-ol, 2-methyl-5-(1-methylethenyl)-, acetate, (1R-cis)-	（1S-顺式）-2-甲基-5-（1-甲基乙烯基）-2-环己烯-1-基乙酸酯	Ester	酯	-	-	7111-29-7	9	9	10365.8	57174	23297	80214.4	1.04973	0.0880413	0.194217	15.4747	3.95184	up
XMW0858	GC-MS	C11H13FN2	6-fluoro-.beta.-methyl-1H-Indole-3-ethanAmine	6-氟-β-甲基-1H-吲哚-3-乙胺	Amine	胺	-	-	77590-52-4	15911.9	11292	19779.3	72459.9	171564	126046	1.26642	0.0629953	0.157224	7.87666	2.97758	up
XMW0813	GC-MS	C12H17NO	Pentanal O-benzyloxime	邻苄基肟戊醛	Nitrogen compounds	含氮化合物	-	-	72399-21-4	119640	130336	202588	486529	996224	748661	1.25366	0.0524909	0.143068	4.93061	2.30177	up
XMW0097	GC-MS	C14H22	1,5-Cycloundecadiene, 8,8-dimethyl-9-methylene-	8,8-二甲基-9-亚甲基-1,5-环癸二烯	Hydrocarbons	烃类	-	-	62338-54-9	1.34435e+07	1.37135e+07	2.23021e+07	8.77353e+07	1.66334e+08	1.0986e+08	1.28215	0.0444968	0.133042	7.35817	2.87935	up
XMW0971	GC-MS	C12H14O2	Benzyl angelate	苯甲酸苄酯	Ester	酯	-	-	37526-87-7	2.26131e+07	2.30686e+07	2.21934e+07	1.16827e+08	1.38141e+08	1.69576e+08	1.31264	0.016182	0.0992405	6.25479	2.64496	up
NMW0357	GC-MS	C11H10O3	7-Ethoxycoumarin	7-乙氧基香豆素	Heterocyclic compound	杂环化合物	-	-	31005-02-4	15190.9	15431.8	19921.7	40144.5	32646.6	30001.8	1.2497	0.0149098	0.0986287	2.03371	1.02412	up
KMW0629	GC-MS	C12H26O	1-Dodecanol	月桂醇	Alcohol	醇	-	-	112-53-8	415395	366100	294248	1.34304e+06	5.22764e+06	8.60291e+06	1.19535	0.154335	0.270729	14.1052	3.81816	up
XMW1079	GC-MS	C11H22O2	Butanoic acid, 1-methylhexyl ester	庚烷-2-基丁酸酯	Ester	酯	-	-	39026-94-3	309319	443278	687216	3.27061e+06	1.47639e+06	2.51192e+06	1.2263	0.0592538	0.152367	5.04157	2.33387	up
XMW1244	GC-MS	C11H22O2	Hexanoic acid, pentyl ester	己酸戊酯	Ester	酯	-	-	540-07-8	12654.9	11583.3	13563.6	59643	48838.9	65181.9	1.31104	0.0102263	0.0967806	4.59407	2.19977	up
KMW0488	GC-MS	C13H28	Tridecane	十三烷	Hydrocarbons	烃类	-	-	629-50-5	8120.89	8728.67	13523	57729	59132.8	44315	1.29223	0.00614919	0.092265	5.30665	2.4078	up
KMW0674	GC-MS	C12H24O	trans-2-Dodecen-1-ol	（E）-2-十二烯-1-醇	Alcohol	醇	-	-	69064-37-5	120101	86332.7	80878.1	950903	1.5582e+06	2.99881e+06	1.28195	0.103199	0.212601	19.1705	4.26082	up
XMW1401	GC-MS	C11H20O2	n-Valeric acid cis-3-hexenyl ester	顺-3-己烯基酯-正戊酸	Ester	酯	-	-	35852-46-1	26395	11912.8	17564.9	64451.4	83376	47927.4	1.20869	0.030951	0.114905	3.50359	1.80883	up
NMW0209	GC-MS	C11H20O2	Undecylenic Acid	十一碳烯酸	Acid	酸	-	-	112-38-9	460808	463351	766180	2.96514e+06	4.78403e+06	3.27403e+06	1.28655	0.0278903	0.111998	6.52129	2.70516	up
WMW0106	GC-MS	C11H20O2	6-Nonen-1-ol, acetate, (Z)-	顺-6-壬烯基乙酸酯	Ester	酯	-	-	76238-22-7	129175	105607	55694.4	781392	5.15701e+06	2.9274e+06	1.23448	0.151952	0.269571	30.5215	4.93176	up
XMW1403	GC-MS	C11H20O2	cis-3-Hexenyl isovalerate	顺-3-异戊基异戊酸酯	Ester	酯	-	-	35154-45-1	27688.1	11865.7	18241.5	67184.8	87908.7	50733.1	1.20397	0.0297555	0.113014	3.56131	1.83241	up
KMW0637	GC-MS	C11H20O2	2H-Pyran-2-one, 6-hexyltetrahydro-	δ-十一内酯	Ester	酯	-	-	710-04-3	16648.3	15688.5	27610.6	55879.1	56475.9	53614.4	1.25045	0.00880147	0.0956355	2.76859	1.46915	up
D380	GC-MS	C11H18O2	3(2H)-Furanone, 2-hexyl-5-methyl-	2-己基-5-甲基-3（2H）-呋喃酮	Ketone	酮	-	-	33922-66-6	35936.1	39507.8	40729.3	181354	204849	248724	1.31311	0.0124414	0.0986287	5.46535	2.45031	up
KMW0449	GC-MS	C11H18O2	Bicyclo[2.2.1]heptan-2-ol, 1,7,7-trimethyl-, formate, endo-	甲酸冰片	Acid	酸	-	-	7492-41-3	84207.5	101528	143465	3.04155e+06	1.8581e+06	3.13792e+06	1.30882	0.0245246	0.111998	24.4154	4.60972	up
NMW0190	GC-MS	C12H23N	CyclohexanAmine, N-cyclohexyl-	N-环己基-环己胺	Amine	胺	-	-	101-83-7	2120.02	1221.27	1792.14	8733.43	3282.55	4983.83	1.1454	0.129879	0.242349	3.31159	1.72752	up
XMW1158	GC-MS	C10H15NO2	Tricyclo[3.3.1.1(3,7)]decane, 2-nitro-	2-硝基-三环[3.3.1.1（3,7）]癸烷	Nitrogen compounds	含氮化合物	-	-	54564-31-7	13328.8	14961.7	27416	517081	328319	604239	1.30209	0.0290562	0.111998	26.0228	4.7017	up
WMW0077	GC-MS	C13H24	1-Tridecyne	1-十三炔	Hydrocarbons	烃类	-	-	26186-02-7	125642	83256.6	254985	694501	1.04465e+06	765408	1.22924	0.0117184	0.0986287	5.39912	2.43272	up
XMW0280	GC-MS	C10H12O3	Carbonic acid, phenyl propyl ester	碳酸苯丙酯	Ester	酯	-	-	13183-16-9	10863.2	8438.33	23347.4	27363.5	36029.2	26732.2	1.04788	0.054384	0.144645	2.11318	1.07941	up
NMW0353	GC-MS	C9H9NO3	Hippuric Acid	N-苯甲酰甘氨酸	Acid	酸	-	-	495-69-2	60199.6	59870.3	119626	200313	180940	190509	1.18173	0.0238354	0.110611	2.38536	1.25421	up
D170	GC-MS	C11H14O2	p-Tolyl isobutyrate	对甲苯基异丁酸酯	Ester	酯	-	-	103-93-5	33495.2	16345.7	48200.8	189255	85557.2	237883	1.16325	0.0858195	0.191163	5.22936	2.38663	up
D145	GC-MS	C11H14O2	Propanoic acid, 2-methyl-, phenylmethyl ester	2-甲基丙酸苄酯	Ester	酯	-	-	103-28-6	215233	138597	437022	1.21706e+06	1.87146e+06	1.29376e+06	1.2265	0.0165005	0.0992405	5.54122	2.4702	up
XMW1343	GC-MS	C11H14O2	1-(3-Ethoxyphenyl)acetone	1-（3-乙氧基苯基）丙酮	Ketone	酮	-	-	23037-47-0	7275.4	18903.1	18558.3	6334.03	4203.68	6708.68	1.0355	0.133416	0.246625	0.385507	-1.37517	down
XMW0682	GC-MS	C12H16O	Benzenemethanol, .alpha.-methyl-.alpha.-(1-methyl-2-propenyl)-	α-甲基-α-（1-甲基-2-丙烯基）-苯甲醇	Alcohol	醇	-	-	61967-11-1	82931	58487.8	30363.5	370735	2.5368e+06	1.46802e+06	1.217	0.154246	0.270729	25.4715	4.67081	up
D422	GC-MS	C11H24O	Undecanol-5	5-十一醇	Alcohol	醇	-	-	37493-70-2	83695.7	85565.7	118431	395489	423335	487307	1.30362	0.00236711	0.0753249	4.54002	2.1827	up
D273	GC-MS	C10H20O2	Butanoic acid, 2-methyl-, 2-methylbutyl ester	2-甲基丁酸2-甲基丁酯	Ester	酯	-	-	2445-78-5	18319.7	15104.1	11248.5	5034.42	6940.74	5010.97	1.24025	0.0360199	0.12088	0.380238	-1.39502	down
D141	GC-MS	C10H20O2	Acetic acid, 2-ethylhexyl ester	乙酸2-乙基己酯	Ester	酯	-	-	103-09-3	8043.92	18489.4	6812.26	26788.4	36160.7	21403.1	1.09609	0.0414626	0.128052	2.52963	1.33893	up
NMW0037	GC-MS	C10H20O2	Butanoic acid, 3-methyl-, 3-methylbutyl ester	3-甲基-丁酸3-甲基丁酯	Ester	酯	-	-	659-70-1	18319.7	14945.2	11248.5	4227.2	6224.4	4309.66	1.25102	0.0304035	0.113987	0.331614	-1.59242	down
D289	GC-MS	C10H20O2	n-Amyl isovalerate	戊基异戊酸酯	Ester	酯	-	-	25415-62-7	61310.7	49637.5	56223.6	195734	98055.3	122643	1.18826	0.103429	0.212603	2.49104	1.31675	up
D240	GC-MS	C10H20O2	Propanoic acid, 2,2-dimethyl-, pentyl ester	丙酸2,2-二甲基戊酯	Ester	酯	-	-	2313-68-0	137805	243372	303037	924501	718794	1.10925e+06	1.24053	0.014548	0.0986287	4.02293	2.00825	up
XMW1226	GC-MS	C10H20O2	Hexanoic acid, 2-methylpropyl ester	2-甲基丙酯-己酸	Ester	酯	-	-	105-79-3	2634.18	1456.2	1865.4	13450.2	18403.3	20328.9	1.29605	0.0151641	0.0986287	8.76164	3.1312	up
D305	GC-MS	C10H20O2	Butanoic acid, 2-methyl-, 3-methylbutyl ester	丁酸，2-甲基-，3-甲基丁酯	Ester	酯	-	-	27625-35-0	19286.8	14945.2	11248.5	3931.88	6016.43	3757.85	1.24461	0.0352777	0.119841	0.301363	-1.73042	down
D313	GC-MS	C10H20O2	3-Hexene, 1-(1-ethoxyethoxy)-, (Z)-	（Z）-1-（1-乙氧基乙氧基）己-3-烯	Aldehyde	醛	-	-	28069-74-1	4209.95	3357.88	3061.74	1207.17	1439.61	2481.11	1.12905	0.0251815	0.111998	0.482418	-1.05164	down
XMW1218	GC-MS	C10H20O2	2-Nonanone, 3-(hydroxymethyl)-	3-（羟甲基）-2-壬酮	Ketone	酮	-	-	67801-33-6	2420.02	3056.25	3920.35	23100.2	19964.9	32126.2	1.29906	0.0251643	0.111998	8.00195	3.00035	up
NMW0208	GC-MS	C9H16O3	9-Oxononanoic Acid	9-氧代壬酸	Acid	酸	-	-	2553-17-5	11556.7	10941.4	14276.3	42438	74877.5	47455.2	1.27943	0.0502223	0.140276	4.48059	2.16369	up
XMW0282	GC-MS	C12H26	2,6-Dimethyldecane	2,6-二甲基癸烷	Hydrocarbons	烃类	-	-	13150-81-7	79593.9	91301.2	61565.6	30850.9	34775.7	24991.2	1.25745	0.0229733	0.108423	0.38982	-1.35912	down
w06	GC-MS	C12H26	Heptane, 2,2,4,6,6-pentamethyl-	2,2,4,6,6-五甲基-庚烷	Hydrocarbons	烃类	-	-	13475-82-6	147451	98056.4	151965	661048	461370	449747	1.27415	0.0237189	0.110611	3.95541	1.98383	up
XMW0373	GC-MS	C12H26	Undecane, 2-methyl-	2-甲基-十一烷	Hydrocarbons	烃类	-	-	7045-71-8	12421.2	14742.2	6286.68	83971.3	49723.6	73898.8	1.25761	0.0238288	0.110611	6.20608	2.63368	up
KMW0297	GC-MS	C10H18O2	trans-Linalool oxide (furanoid)	（E）-芳樟醇氧化物	Heterocyclic compound	杂环化合物	-	-	34995-77-2	378464	287221	232636	87927.7	135484	114724	1.23421	0.0377681	0.122369	0.376408	-1.40963	down
NMW0127	GC-MS	C10H18O2	6-Octenoic Acid, 3,7-dimethyl-	3,7-二甲基-6-辛烯酸	Acid	酸	-	-	502-47-6	1.86076e+06	2.5179e+06	1.43937e+06	374107	161111	249133	1.26976	0.0293484	0.112471	0.134814	-2.89096	down
XMW0775	GC-MS	C12H24	1-Undecene, 9-methyl-	9-甲基-1-十一碳烯	Hydrocarbons	烃类	-	-	74630-41-4	28492.2	25842.4	21038.3	505090	290546	252343	1.3022	0.0540275	0.14456	13.9039	3.79742	up
KMW0370	GC-MS	C11H20O	2-Methylisoborneol	甲基异冰片	Terpenoids	萜类	-	-	2371-42-8	153977	66230	112085	782044	488872	725900	1.25937	0.0190044	0.100137	6.00922	2.58718	up
NMW0087	GC-MS	C10H16O2	2-Oxabicyclo[2.2.2]octan-6-one, 1,3,3-trimethyl-	1,3,3-三甲基-2-氧杂双环[2.2.2]辛酮	Terpenoids	萜类	-	-	107598-08-3	600375	869407	1.36605e+06	6.96895e+06	3.57927e+06	5.49739e+06	1.2488	0.0404232	0.1262	5.65816	2.50033	up
WMW0208	GC-MS	C10H16O2	2H-Pyran-2-one, tetrahydro-6-(2-pentenyl)-, (Z)-	（Z）-四氢-6-（2-戊烯基）-2H-吡喃-2-酮	Ketone	酮	-	-	25524-95-2	13528.8	11253.9	34034	40484.5	40629.2	38191.9	1.01871	0.106787	0.21606	2.02843	1.02036	up
XMW0907	GC-MS	C9H12O3	2-(2-Acetoxy-1-propyl)furan, (S)	（S）-2-（2-乙酰氧基-1-丙基）呋喃	Heterocyclic compound	杂环化合物	-	-	60830-70-8	20066.3	22959.7	85548	522964	308644	267405	1.2137	0.0468846	0.136311	8.54771	3.09554	up
XMW0424	GC-MS	C11H18O	2,6-Dimethyl-1-nonen-3-yn-5-ol	2,6-二甲基-1-壬烯基-5-醇	Alcohol	醇	-	-	19780-98-4	34641.4	22138.3	68993.5	186331	305633	211733	1.22582	0.0222843	0.106815	5.59497	2.48413	up
NMW0151	GC-MS	C10H14O2	Bicyclo[3.1.1]hept-2-ene-2-carboxylic acid, 6,6-dimethyl-	6,6-二甲基-双环[3.1.1]庚-2-烯-2-羧酸	Terpenoids	萜类	-	-	19250-17-0	422803	481964	578733	1.57352e+06	713943	1.27473e+06	1.13028	0.10633	0.21606	2.40121	1.26376	up
D113	GC-MS	C10H14O2	Benzene, (2,2-dimethoxyethyl)-	（2,2-二甲氧基乙基）-苯	Aromatics	芳烃	-	-	101-48-4	2007.03	1625.32	3247.24	69633.6	41871.5	73950.8	1.30398	0.0271078	0.111998	26.9574	4.75261	up
NMW0211	GC-MS	C10H14O2	1-Cyclohexene-1-carboxylic acid, 4-(1-methylethenyl)-	4-（1-甲基乙烯基）-1-环己烯-1-羧酸	Terpenoids	萜类	-	-	7694-45-3	281334	287638	475147	1.28753e+06	3.8488e+06	1.25263e+06	1.1919	0.173317	0.292473	6.119	2.6133	up
KMW0365	GC-MS	C10H14O2	2-((3,3-Dimethyloxiran-2-yl)methyl)-3-methylfuran	（环氧甲基丁基）-甲基呋喃	Heterocyclic compound	杂环化合物	-	-	92356-06-4	9	9	73543	242636	153995	198996	1.00152	0.0080183	0.092265	8.09706	3.0174	up
XMW1439	GC-MS	C9H11NO2	Benzene, (1-nitropropyl)-	（1-硝基丙基）-苯	Nitrogen compounds	含氮化合物	-	-	5279-14-1	939341	1.02452e+06	614748	213954	143847	359528	1.19915	0.0218247	0.105235	0.278184	-1.84589	down
D359	GC-MS	C10H16N2	Pyrazine, 2,3-dimethyl-5-(1-methylpropyl)-	2,3-二甲基-5-（1-甲基丙基）-吡嗪	Heterocyclic compound	杂环化合物	-	-	32263-00-6	63199.2	55037.4	132814	185401	201947	230130	1.1445	0.0215253	0.104518	2.45958	1.29841	up
D143	GC-MS	C10H12O2	Benzenepropanoic acid, methyl ester	苯丙酸甲酯	Ester	酯	-	-	103-25-3	2167.26	1806.46	3510.57	7057.58	9245.48	12644	1.23378	0.0377573	0.122369	3.86771	1.95148	up
XMW1406	GC-MS	C10H12O2	2'-Ethoxyacetophenone	2'-乙氧基苯乙酮	Ketone	酮	-	-	2142-67-8	104982	56535.9	119068	47759.2	39641.3	33970.9	1.12383	0.101421	0.210155	0.432564	-1.20901	down
NMW0264	GC-MS	C9H8O3	2-Propenoic Acid, 3-(3-hydroxyphenyl)-	3-（3-羟苯基）-2-丙酸	Acid	酸	-	-	588-30-7	123796	106424	204683	604542	1.0682e+06	774873	1.26716	0.033197	0.118781	5.62796	2.49261	up
XMW0794	GC-MS	C12H18	1,5-Cyclooctadiene, 3-(1-methyl-2-propenyl)-	3-（1-甲基-2-丙烯基）-1,5-环辛二烯	Hydrocarbons	烃类	-	-	16538-88-8	611528	388232	441195	9	9	9	1.32205	0.0191077	0.100137	1.87376e-05	-15.7037	down
XMW0786	GC-MS	C12H18	Benzene, 1,3,5-triethyl-	1,3,5-三乙基-苯	Aromatics	芳烃	-	-	102-25-0	11624.5	20308.1	27659.4	89064.8	89635.2	101627	1.2609	0.000311168	0.042654	4.7041	2.23392	up
XMW0793	GC-MS	C12H18	1,7-Octadiene, 2,7-dimethyl-3,6-bis(methylene)-	2,7-二甲基-3,6-双（亚甲基）-1,7-辛二烯	Hydrocarbons	烃类	-	-	16714-60-6	170399	121402	272130	399435	705979	599878	1.17588	0.0336325	0.118781	3.02394	1.59643	up
XMW1303	GC-MS	C8H16O3	Pentanoic acid, 2-hydroxy-4-methyl-, ethyl ester	2-羟基-4-甲基戊酸乙酯	Ester	酯	-	-	10348-47-7	685948	1.22358e+06	1.52266e+06	5.03379e+06	3.87872e+06	6.14997e+06	1.2456	0.0176332	0.0992405	4.3886	2.13376	up
XMW0718	GC-MS	C7H12O4	Butanedioic acid, methyl-, dimethyl ester	甲基丁二酸二甲酯	Ester	酯	-	-	1604-11-1	90677.5	164026	202810	615963	494705	737305	1.24116	0.0108574	0.0986287	4.03916	2.01406	up
KMW0416	GC-MS	C6H8OS2	Furan, 2-[(methyldithio)methyl]-	糠基甲基二含硫化合物	Sulfur compounds	含硫化合物	-	-	57500-00-2	170300	175689	292309	6.48264e+06	3.89285e+06	6.8846e+06	1.30694	0.027272	0.111998	27.0408	4.75706	up
NMW0086	GC-MS	C11H13N	Pargyline	矮牵牛	Amine	胺	-	-	555-57-7	465449	768917	1.22632e+06	7.10357e+06	3.71297e+06	5.60594e+06	1.25	0.0362091	0.121053	6.67395	2.73854	up
XMW1310	GC-MS	C9H18O2	Isobutyl isovalerate	异戊酸异丁酯	Ester	酯	-	-	589-59-3	4393.59	9122.95	4648.55	35806.5	23957.5	32753.4	1.26322	0.0102744	0.0967806	5.09315	2.34856	up
D270	GC-MS	C9H18O2	Propanoic acid, 2-methyl-, pentyl ester	丙酸2-甲基戊酯	Ester	酯	-	-	2445-72-9	295759	530616	670462	2.3494e+06	1.76222e+06	2.86862e+06	1.24669	0.0202326	0.101539	4.66333	2.22136	up
WMW0087	GC-MS	C9H18O2	Butanoic Acid, 3-methylbutyl ester	丁酸异戊酯	Acid	酸	-	-	106-27-4	2182.87	3664.7	5402.58	13300.8	9462.63	21524.5	1.1769	0.0819914	0.186126	3.93665	1.97697	up
KMW0279	GC-MS	C9H18O2	Butanoic acid, pentyl ester	丁酸戊酯	Ester	酯	-	-	540-18-1	27390.6	22106.3	28960.2	67582.2	48839.8	113761	1.1763	0.118264	0.228704	2.93388	1.55281	up
XMW1127	GC-MS	C9H18O2	Formic acid, octyl ester	甲酸辛酯	Ester	酯	-	-	112-32-3	561821	423694	476360	187367	277314	229746	1.24151	0.00911334	0.0963146	0.475025	-1.07393	down
D269	GC-MS	C9H18O2	Butanoic acid, 2-methyl-, 2-methylpropyl ester	丁酸2-甲基-2-甲基丙酯	Ester	酯	-	-	2445-67-2	14887.8	32725.1	16349.1	207443	143418	194551	1.28521	0.00982049	0.0967806	8.52713	3.09206	up
XMW1211	GC-MS	C9H18O2	2-Heptanol, acetate	1-甲基己基乙酸酯	Ester	酯	-	-	5921-82-4	7557.57	6720.47	6324.35	59979.6	43371.6	44345.9	1.31284	0.0154148	0.0986287	7.16893	2.84176	up
D199	GC-MS	C8H14O3	Hexanoic acid, 3-oxo-, ethyl ester	己酸-3-氧代乙酯	Ester	酯	-	-	3249-68-1	160587	181113	177851	31682	24948.5	50556.5	1.27991	0.000196232	0.0354741	0.206307	-2.27714	down
XMW0281	GC-MS	C11H24	Decane, 5-methyl-	5-甲基-癸烷	Hydrocarbons	烃类	-	-	13151-35-4	137540	240786	299958	911781	708297	1.1125e+06	1.24038	0.0168259	0.0992405	4.02866	2.0103	up
D440	GC-MS	C10H20O	Cyclohexanol, 1-methyl-4-(1-methylethyl)-, cis-	1-甲基-4-（1-甲基乙基）-环己醇	Terpenoids	萜类	-	-	3901-95-9	51994.9	21912.9	17018.5	75065.9	79558.4	76972.7	1.10898	0.0485165	0.138766	2.54709	1.34885	up
KMW0250	GC-MS	C10H20O	7-Octen-2-ol, 2,6-dimethyl-	6（10）-二氢月桂烯醇	Terpenoids	萜类	-	-	18479-58-8	92274.5	164603	203096	619341	496052	740574	1.24317	0.0111936	0.0986287	4.03494	2.01255	up
NMW0098	GC-MS	C8H13NO2	Arecoline	槟榔碱	Heterocyclic compound	杂环化合物	-	-	63-75-2	3412.66	3417.68	5326.92	2207.8	1440.76	1002.98	1.15763	0.0389787	0.124475	0.382614	-1.38604	down
XMW1472	GC-MS	C11H22	Cyclohexane, 1-ethyl-2-propyl-	1-乙基-2-丙基-环己烷	Hydrocarbons	烃类	-	-	62238-33-9	56244.1	20072.7	23512.8	102211	115201	111113	1.18023	0.0147143	0.0986287	3.29085	1.71846	up
KMW0342	GC-MS	C10H18O	Citronellal	香茅醛	Terpenoids	萜类	-	-	106-23-0	109778	161100	90582.6	2.1399e+06	1.45217e+06	1.27683e+06	1.30342	0.0287199	0.111998	13.4701	3.75169	up
D409	GC-MS	C10H18O	(S)-2,5-Dimethyl-3-vinylhex-4-en-2-ol	（S）-2,5-二甲基-3-乙烯基己基-4-烯-2-醇	Alcohol	醇	-	-	35671-15-9	1.81652e+06	841794	1.00938e+06	1.96952e+07	1.58093e+07	1.57888e+07	1.29954	0.0047439	0.0881501	13.9851	3.80582	up
D401	GC-MS	C10H18O	2-Isopropyl-5-methylhex-2-enal	2-异丙基-5-甲基己烯醛	Aldehyde	醛	-	-	35158-25-9	48281.8	39644.2	30219.9	108879	85334.4	80119.1	1.23249	0.0122642	0.0986287	2.32198	1.21536	up
XMW0217	GC-MS	C10H18O	cis-7-Decen-1-al	Cis-7-癸烯醛	Aldehyde	醛	-	-	21661-97-2	148257	202568	255795	1.18993e+06	855140	1.16725e+06	1.29026	0.0104172	0.0971904	5.29543	2.40475	up
KMW0588	GC-MS	C10H18O	3-Cyclohexene-1-ethanol, .beta.,4-dimethyl-	2-（4-甲基环己-3-烯-1-基）丙-1-醇	Alcohol	醇	-	-	18479-68-0	81647.3	51797.6	170563	480882	721408	519875	1.22573	0.01194	0.0986287	5.66487	2.50204	up
KMW0385	GC-MS	C10H18O	2-methyl-5-(1-methylethenyl)-Cyclohexanol	二氢香芹醇	Terpenoids	萜类	-	-	619-01-2	893847	236118	380044	1.58695e+06	937333	1.1692e+06	1.01891	0.0576931	0.149868	2.446	1.29042	up
KMW0301	GC-MS	C10H18O	Bicyclo[3.1.0]hexan-2-ol, 2-methyl-5-(1-methylethyl)-, (1.alpha.,2.alpha.,5.alpha.)-	(1.alpha.,2.alpha.,5.alpha.)-2-甲基-5-(1-甲基乙基)-双环[3.1.0]己-2-醇	Terpenoids	萜类	-	-	17699-16-0	2.63596e+06	2.23688e+06	3.05719e+06	8.12815e+06	5.8118e+06	1.36887e+07	1.20652	0.105321	0.214739	3.48405	1.80077	up
KMW0362	GC-MS	C10H18O	Isoborneol	异樟脑	Terpenoids	萜类	-	-	124-76-5	60426.6	37755.9	35283.2	660769	567263	498713	1.30765	0.00648865	0.092265	12.9377	3.69351	up
XMW1074	GC-MS	C10H18O	1-Cyclopentene-1-methanol, 2-methyl-5-(1-methylethyl)-	2-甲基-5-（1-甲基乙基）-1-环戊烯-1-甲醇	Alcohol	醇	-	-	80113-82-2	883020	236331	375333	1.58732e+06	933793	1.15757e+06	1.02286	0.0569409	0.148563	2.46118	1.29935	up
XMW1227	GC-MS	C9H14O2	(E)-2-Methylbut-2-en-1-yl methacrylate	（E）-2-甲基丙烯酸-2-甲基丁-2-烯-1-基酯	Ester	酯	-	-	88142-95-4	133678	118344	245182	852112	1.63846e+06	1.22286e+06	1.2692	0.0385503	0.123778	7.46864	2.90084	up
XMW1131	GC-MS	C8H10O3	2,5-Furandione, 3-methyl-4-propyl-	3-甲基-4-丙基-2,5-呋喃二酮	Ketone	酮	-	-	16493-20-2	15115.8	12441.6	9958.62	32580.5	49777.6	24453.9	1.19654	0.0851962	0.190489	2.8471	1.50949	up
XMW1440	GC-MS	C8H10O3	2-methylprop-2-enoyl 2-methylprop-2-enoate	2-甲基丙-2-烯丙基2-甲基丙-2-烯酸酯	Ester	酯	-	-	760-93-0	165666	186189	228752	1.06399e+06	778083	1.29606e+06	1.29394	0.0279584	0.111998	5.40491	2.43427	up
XMW0663	GC-MS	C9H16N2	3,5-Dimethyl-1-butylpyrazole	3,5-二甲基-1-丁基吡唑	Heterocyclic compound	杂环化合物	-	-	2655-37-0	54348	25697.2	29137.4	141796	170176	139180	1.2541	0.00109475	0.0585686	4.1321	2.04687	up
XMW0681	GC-MS	C10H16O	6-Octenal, 7-methyl-3-methylene-	7-甲基-3-亚甲基-6-辛烯醛	Aldehyde	醛	-	-	55050-40-3	8444.49	6481.41	10100.3	47338	50381	67371	1.30038	0.0153058	0.0986287	6.59669	2.72174	up
XMW1137	GC-MS	C10H16O	Ethanone, 1-(1,3-dimethyl-3-cyclohexen-1-yl)-	1-（1,3-二甲基-3-环己烯-1-基）-乙酮	Terpenoids	萜类	-	-	51733-68-7	28471	15228.6	45450.7	281888	175890	132251	1.22682	0.0591424	0.1523	6.61837	2.72648	up
KMW0324	GC-MS	C10H16O	Limonene oxide, cis-	（Z）-柠檬烯氧化物	Terpenoids	萜类	-	-	13837-75-7	36348.5	11819.4	14799.3	227574	177300	123585	1.24659	0.0290783	0.111998	8.39262	3.06912	up
XMW0526	GC-MS	C10H16O	AcetAldehyde, (3,3-dimethylcyclohexylidene)-, (Z)-	（Z）-（3,3-二甲基环己叉基）-乙醛	Aldehyde	醛	-	-	26532-24-1	71752	71493.7	129277	3.29614e+06	1.9167e+06	3.5068e+06	1.30574	0.0298025	0.113014	31.996	4.99982	up
XMW0725	GC-MS	C10H16O	(-)-cis-Isopiperitenol	（-）-顺式异胡椒醇	Terpenoids	萜类	-	-	96555-02-1	112391	39297.6	35099.6	144598	129269	189551	1.05619	0.0459124	0.135457	2.48099	1.31091	up
NMW0046	GC-MS	C10H16O	Bicyclo[3.1.1]heptan-3-ol, 6,6-dimethyl-2-methylene-, [1S-(1.alpha.,3.alpha.,5.alpha.)]-	[1S-（1α，3α，5α）]-6,6-二甲基-2-亚甲基-双环[3.1.1]庚-3-醇	Terpenoids	萜类	-	-	547-61-5	140918	126567	189870	1.19611e+06	897314	1.53097e+06	1.29815	0.0276566	0.111998	7.92467	2.98635	up
XMW0189	GC-MS	C10H16O	3-Cyclohexene-1-acetAldehyde, .alpha.,4-dimethyl-	α，4-二甲基-3-环己烯-1-乙醛	Aldehyde	醛	-	-	29548-14-9	38687.2	37589.5	66389.6	1.63066e+06	980584	1.72787e+06	1.30717	0.0268268	0.111998	30.4144	4.92668	up
XMW0166	GC-MS	C10H16O	3,7-Nonadien-2-one, 8-methyl-, (E)-	（E）-8-甲基-3,7-壬二烯-2-酮	Ketone	酮	-	-	35408-14-1	8103.19	6887.97	12326.7	67048.8	56917.6	100346	1.28772	0.0358832	0.120649	8.2112	3.03759	up
WMW0042	GC-MS	C10H16O	Bicyclo[3.1.1]heptan-3-ol, 6,6-dimethyl-2-methylene-	反式松香酚	Terpenoids	萜类	-	-	5947-36-4	9266.79	4279.7	4250.57	15232.5	11954.4	13062.9	1.12577	0.0268431	0.111998	2.2616	1.17735	up
KMW0181	GC-MS	C10H16O	2,3-Dehydro-1,8-cineole	2,3-脱氢-1,8-桉树脑	Terpenoids	萜类	-	-	92760-25-3	6342.79	6133.35	7149.84	1.16303e+06	556821	672945	1.31641	0.0509659	0.141877	121.92	6.92979	up
KMW0329	GC-MS	C10H16O	Camphor	樟脑	Terpenoids	萜类	-	-	76-22-2	22338.7	9846.91	20383.8	50640.9	54330.5	53826.6	1.20343	0.00760055	0.092265	3.02073	1.5949	up
KMW0254	GC-MS	C10H16O	1,5-Heptadien-4-one, 3,3,6-trimethyl-	蒿酮	Terpenoids	萜类	-	-	546-49-6	50641.4	78653.9	97616.9	304856	237101	375454	1.25637	0.0198996	0.101539	4.04302	2.01543	up
XMW0654	GC-MS	C10H16O	Ethanone, 1-(1,4-dimethyl-3-cyclohexen-1-yl)-	1-（1,4-二甲基-3-环己烯-1-基）-乙酮	Terpenoids	萜类	-	-	43219-68-7	33585	15176.4	34603.3	315730	420355	286460	1.28699	0.0147157	0.0986287	12.2659	3.61658	up
KMW0310	GC-MS	C10H16O	2-Cyclohexen-1-ol, 1-methyl-4-(1-methylethenyl)-, trans-	（1R，4R）-1-甲基-4-丙-1-烯-2-基环己基-2-烯-1-醇	Alcohol	醇	-	-	7212-40-0	9371.6	17758.3	15708.4	99863.5	39320.7	31305	1.12174	0.186676	0.303796	3.97983	1.99271	up
D193	GC-MS	C10H16O	p-Mentha-1,8-dien-7-ol	对-孟沙-1,8-二烯-7-醇	Terpenoids	萜类	-	-	536-59-4	53674.6	36959.7	112285	297866	440749	324628	1.22756	0.0101005	0.0967806	5.23974	2.3895	up
D287	GC-MS	C10H16O	Cyclopentanone, 2-(3-methyl-2-buten-1-yl)-	2-（3-甲基-2-丁烯基）环戊酮	Ketone	酮	-	-	2520-60-7	91286.3	46818.1	44359.7	165160	193695	185147	1.21891	0.00544274	0.0909479	2.98142	1.576	up
WMW0159	GC-MS	C10H16O	(+)-(1R,4R,5R)-2-(10)-PINEN-4-OL	（+）-顺式-邻苯二酚	Terpenoids	萜类	-	-	13040-03-4	122038	55534.6	63007	506528	426611	411175	1.26972	0.00087836	0.0585686	5.58781	2.48228	up
XMW0766	GC-MS	C10H16O	Cyclohexanone, 5-methyl-2-(1-methylethylidene)-	5-甲基-2-（1-甲基亚乙基）-环己酮	Terpenoids	萜类	-	-	15932-80-6	156716	263772	387103	1.8403e+06	1.00707e+06	1.50112e+06	1.24252	0.0320585	0.117548	5.38452	2.42882	up
KMW0290	GC-MS	C10H16O	Hotrienol	丁烯醇	Alcohol	醇	-	-	20053-88-7	6.38438e+06	4.31085e+06	5.07031e+06	774436	868487	692758	1.31083	0.0172625	0.0992405	0.148151	-2.75486	down
XMW0720	GC-MS	C10H16O	cis-p-Mentha-2,8-dien-1-ol	顺式-p-薄荷（2,8-二烯-1-醇）	Terpenoids	萜类	-	-	3886-78-0	1.43892e+06	1.96636e+06	2.82044e+06	1.72447e+07	1.17189e+07	2.19577e+07	1.28212	0.0351841	0.119841	8.17919	3.03196	up
QWM0003	GC-MS	C10H16O	2H-Pyran, 3,6-dihydro-4-methyl-2-(2-methyl-1-propenyl)-	3,6-二氢-4-甲基-2-（2-甲基-1-丙烯基）-2H-吡喃	Terpenoids	萜类	-	-	1786-08-9	25283.5	24771.7	29202.9	412339	483746	369058	1.31921	0.00700157	0.092265	15.9623	3.9966	up
XMW1133	GC-MS	C10H16O	5-Isopropyl-3,3-dimethyl-2-methylene-2,3-dihydrofuran	5-异丙基-3,3-二甲基-2-亚甲基-2,3-二氢呋喃	Heterocyclic compound	杂环化合物	-	-	81250-44-4	122320	264437	110350	2.28706e+06	1.38486e+06	2.05601e+06	1.28406	0.0204038	0.101848	11.5225	3.52639	up
KMW0459	GC-MS	C10H16O	2,6-Octadienal, 3,7-dimethyl-, (E)-	（E）-3,7-二甲基-2,6-辛二烯醛	Terpenoids	萜类	-	-	141-27-5	184863	104474	130272	26267.2	50427.4	21342.8	1.22441	0.0328196	0.118781	0.233639	-2.09764	down
D329	GC-MS	C10H16O	Myroxide	肉豆蔻	Terpenoids	萜类	-	-	28977-57-3	422922	549605	795746	4.91011e+06	3.43726e+06	6.24518e+06	1.28638	0.0321924	0.117797	8.25243	3.04482	up
XMW1147	GC-MS	C10H16O	Tricyclo[2.2.1.0(2,6)]heptane-3-methanol, 2,3-dimethyl-	2,3-二甲基-三环[2.2.1.0（2,6）]庚烷-3-甲醇	Terpenoids	萜类	-	-	29550-55-8	88688.5	51921	132090	603746	201316	812797	1.13477	0.12745	0.239322	5.93276	2.5687	up
XMW0764	GC-MS	C10H16O	(S)-(-)-(4-Isopropenyl-1-cyclohexenyl)methanol	（S）-（-）-（4-异丙烯基-1-环己烯基）甲醇	Terpenoids	萜类	-	-	18457-55-1	81566.9	95625.6	50175.5	9	9	12553.6	1.06723	0.0250509	0.111998	0.0552919	-4.17679	down
XMW1386	GC-MS	C9H12O2	2-Acetyl-4,4-dimethyl-cyclopent-2-enone	2-乙酰基-4,4-二甲基-环戊-2-烯酮	Ketone	酮	-	-	81979-96-6	385428	441709	452350	1.59955e+06	1.20891e+06	1.33315e+06	1.30563	0.0122062	0.0986287	3.23692	1.69462	up
NMW0197	GC-MS	C8H8O3	Benzoic Acid, 4-methoxy-	4-甲氧基苯甲酸	Aromatics	芳烃	-	-	100-09-4	5.08223e+06	5.24255e+06	4.73181e+06	3.1605e+07	3.74936e+07	4.4973e+07	1.3147	0.0133553	0.0986287	7.57619	2.92147	up
D384	GC-MS	C4H8S3	TriSulfur compounds, methyl 2-propenyl	烯丙基三硫	Sulfur compounds	含硫化合物	-	-	34135-85-8	4682.48	6360.37	10237.8	56849.6	36804.2	71022.1	1.27051	0.0374201	0.121924	7.7383	2.95202	up
XMW1139	GC-MS	C11H18	Naphthalene, 1,2,3,4,4a,5,6,7-octahydro-4a-methyl-	1,2,3,4,4a，5,6,7-八氢-4a-甲基-萘	Aromatics	芳烃	-	-	13943-77-6	24966.8	26869.9	61285.5	580580	293348	252066	1.25513	0.0803995	0.183447	9.9538	3.31525	up
XMW0690	GC-MS	C11H18	Cyclohexene, 2,4-dimethyl-1-(1-methylethenyl)-	2,4-二甲基-1-（1-甲基乙烯基）-环己烯	Hydrocarbons	烃类	-	-	56763-60-1	7.18749e+06	4.86319e+06	5.706e+06	2.13065e+06	1.35711e+06	1.40246e+06	1.27321	0.0152046	0.0986287	0.275402	-1.86039	down
XMW0925	GC-MS	C10H14O	Camphenone, 6-	6-甲苯酮	Ketone	酮	-	-	55659-42-2	7.19643e+06	4.87266e+06	5.71928e+06	2.12657e+06	1.35128e+06	1.39799e+06	1.27338	0.0150312	0.0986287	0.274103	-1.86721	down
NMW0093	GC-MS	C10H14O	D-Verbenone	D-马鞭草酮	Terpenoids	萜类	-	-	18309-32-5	23412.7	24857.7	108576	238757	148589	165893	1.08813	0.0285847	0.111998	3.52727	1.81855	up
XMW0968	GC-MS	C10H14O	4,7,7-Trimethylbicyclo[4.1.0]hept-3-en-2-one	4,7,7-三甲基双环[4.1.0] 庚-3-烯-2-酮	Ketone	酮	-	-	81800-50-2	2.01591e+06	2.73241e+06	1.55934e+06	397781	158621	261403	1.2658	0.0289848	0.111998	0.129653	-2.94728	down
XMW0721	GC-MS	C10H14O	Benzene, 1-methoxy-4-propyl-	1-甲氧基-4-丙基-苯	Aromatics	芳烃	-	-	104-45-0	6462.99	4353.5	6812.63	105702	70968.8	65668.2	1.30577	0.0265887	0.111998	13.7465	3.78099	up
KMW0473	GC-MS	C10H14O	4-Isopropylcyclohexa-1,3-dienecarbAldehyde	1,3-p-薄荷脑-7-醛	Aldehyde	醛	-	-	1197-15-5	32914.7	23948.3	66895.3	216615	321696	355060	1.25384	0.0180795	0.0992405	7.21867	2.85173	up
NMW0006	GC-MS	C10H14O	2-Cyclohexen-1-one, 3-methyl-6-(1-methylethylidene)-	3-甲基-6-（1-甲基亚乙基）-2-环己烯-1-酮	Terpenoids	萜类	-	-	491-09-8	10613.7	9510.92	15581.2	108456	140527	108427	1.30745	0.00827334	0.092265	10.0098	3.32335	up
XMW0909	GC-MS	C10H14O	2,6,6-Trimethylbicyclo[3.2.0]hept-2-en-7-one	2,6,6-三甲基双环[3.2.0]庚-2-烯-7-酮	Terpenoids	萜类	-	-	4613-37-0	2.7924e+06	1.91432e+06	2.2217e+06	1.24588e+06	635439	705235	1.20071	0.0128477	0.0986287	0.373325	-1.4215	down
KMW0418	GC-MS	C10H14O	(1R)-(-)-Myrtenal	S-肉豆蔻醛	Aldehyde	醛	-	-	18486-69-6	193228	140633	172730	1.38168e+06	1.02351e+06	1.59303e+06	1.30534	0.0190842	0.100137	7.8924	2.98046	up
NMW0052	GC-MS	C10H14O	2-Methyl-6-methyleneocta-2,7-dien-4-one	2-甲基-6-亚甲基辛基-2,7-二烯酮	Terpenoids	萜类	-	-	539-70-8	9333.29	11511.1	19256.6	30965.5	58503.4	49553.3	1.20259	0.0422564	0.129137	3.4668	1.7936	up
D376	GC-MS	C10H14O	(Z)-2,6-Dimethylocta-2,5,7-trien-4-one	（Z）-2,6-二甲基-2,5,7-辛三烯-4-酮	Ketone	酮	-	-	33746-71-3	8839.16	6173.78	58169.8	208095	93445.8	95111.5	1.08192	0.0877123	0.193951	5.42002	2.4383	up
XMW1252	GC-MS	C10H14O	2(1H)-Naphthalenone, 3,4,5,6,7,8-hexahydro-	3,4,5,6,7,8-六氢-2（1H）-萘酮	Ketone	酮	-	-	13837-12-2	271372	361304	204320	58102.6	22577	48185.2	1.24842	0.0298072	0.113014	0.153961	-2.69936	down
NMW0153	GC-MS	C10H14O	Phenol, 4-butyl-	4-丁基-苯酚	Phenol	酚	-	-	1638-22-8	648375	718608	812812	2.60588e+06	1.17661e+06	2.06515e+06	1.17288	0.0972936	0.206028	2.68266	1.42366	up
KMW0408	GC-MS	C10H14O	Benzenemethanol, .alpha.,.alpha.,4-trimethyl-	对苯三酚	Terpenoids	萜类	-	-	1197-01-9	9	9	9	580580	293348	252066	1.32079	0.0681207	0.164264	41703.5	15.3479	up
NMW0128	GC-MS	C10H14O	Phenol, 4-(1-methylpropyl)-	4-（1-甲基）苯酚	Phenol	酚	-	-	99-71-8	628632	851014	487403	125231	53519.1	83231.7	1.26988	0.0290993	0.111998	0.133185	-2.9085	down
XMW1088	GC-MS	C9H10O2	4-Hydroxy-2-methylacetophenone	4-羟基-2-甲基苯乙酮	Ketone	酮	-	-	875-59-2	102835	112291	140986	372120	165755	295290	1.1134	0.113694	0.223746	2.33962	1.22627	up
XMW0535	GC-MS	C9H10O2	p-Tolylacetic Acid	对甲苯甲酸	Aromatics	芳烃	-	-	622-47-9	389084	440145	540252	1.46907e+06	685594	1.17875e+06	1.14546	0.0984135	0.206895	2.43407	1.28337	up
NMW0039	GC-MS	C6H14S2	DiSulfur compounds, dipropyl	二硫化二丙基	Sulfur compounds	含硫化合物	-	-	629-19-6	203501	308561	591547	1.73851e+06	1.82097e+06	2.43955e+06	1.24122	0.0071325	0.092265	5.43583	2.4425	up
XMW0545	GC-MS	C10H15N	Benzenemethanamine, N-(1-methylethyl)-	N-（1-甲基乙基）-苯甲胺	Aromatics	芳烃	-	-	102-97-6	153280	177475	341070	7.23433e+06	4.41703e+06	7.90367e+06	1.30146	0.0273078	0.111998	29.1073	4.86331	up
NMW0143	GC-MS	C10H15N	BenzenAmine, 2,6-diethyl-	2,6-二乙基苯甲胺	Amine	胺	-	-	579-66-8	48037.1	48051.6	58196.5	9	4055.57	9	1.12513	0.00163035	0.0648576	0.0264028	-5.24316	down
NMW0156	GC-MS	C8H7NS	Benzene, (isothiocyanatomethyl)-	苯异硫氰酸酯	Heterocyclic compound	杂环化合物	-	-	622-78-6	456713	514096	628506	1.7216e+06	775330	1.34031e+06	1.12997	0.108689	0.217493	2.3993	1.26261	up
NMW0135	GC-MS	C8H7NS	Thiocyanic acid, phenylmethyl ester	苯甲基酯硫氰酸	Sulfur compounds	含硫化合物	-	-	3012-37-1	17283.8	12307.5	32108.9	35959	51324.6	42398.1	1.06251	0.042037	0.129111	2.1018	1.07163	up
XMW0941	GC-MS	C11H16	exo-7-(trans-1-Propenyl)bicyclo[4.2.0]oct-1(2)-ene	7-[（1E）-1-丙烯基]双环[4.2.0]辛-1-烯	Hydrocarbons	烃类	-	-	107983-42-6	475018	489206	725843	4.83923e+06	3.64227e+06	6.27295e+06	1.29803	0.0280015	0.111998	8.7301	3.126	up
XMW0931	GC-MS	C10H12O	8,9-Dehydrothymol	8,9-脱氢百里酚	Phenol	酚	-	-	18612-99-2	48532.9	72622.1	113328	351813	360763	393308	1.265	0.000473747	0.0556271	4.71626	2.23764	up
XMW0936	GC-MS	C10H12O	Ethanone, 1-(4-ethylphenyl)-	1-（4-乙基苯基）-乙酮	Ketone	酮	-	-	937-30-4	69604.9	52866.9	107301	29407.7	30091.5	36459.1	1.17569	0.10659	0.21606	0.417622	-1.25973	down
KMW0213	GC-MS	C6H12O2S	3-Mercapto-3-methylbutyl formate (ester)	巯基甲基丁酸酯	Sulfur compounds	含硫化合物	-	-	50746-10-6	2434.44	1164	8098.57	24077.7	32968.2	20545.1	1.16543	0.012116	0.0986287	6.63341	2.72975	up
XMW0533	GC-MS	C9H8S	3-Methylbenzothiophene	3-甲基苯并噻吩	Heterocyclic compound	杂环化合物	-	-	1455-18-1	16850.6	22377	12841.2	8549.64	5757.44	6638.32	1.20796	0.0542345	0.144645	0.402264	-1.31379	down
XMW0811	GC-MS	C9H9NO	Phenethyl isocyanate	异氰酸苯乙酯	Ester	酯	-	-	1943-82-4	141865	180695	340500	7.23202e+06	4.39868e+06	7.74287e+06	1.30033	0.0263621	0.111998	29.2184	4.86881	up
D455	GC-MS	C7H14O3	Pentanoic acid, 2-hydroxy-4-methyl-, methyl ester	2-羟基-4-甲基-戊酸甲酯	Ester	酯	-	-	40348-72-9	506029	464312	554256	8.257e+07	3.97299e+07	4.63939e+07	1.31597	0.0525866	0.143068	110.648	6.78984	up
XMW1220	GC-MS	C6H10O4	Ethyl hydrogen succinate	琥珀酸氢乙酯	Ester	酯	-	-	1070-34-4	3306.8	5075.34	7411.79	47101.3	28491.7	61038.5	1.26756	0.0486462	0.138766	8.65089	3.11285	up
KMW0560	GC-MS	C9H6O2	Coumarin	香豆素	Heterocyclic compound	杂环化合物	-	-	91-64-5	593241	586965	603410	3.48083e+06	4.05893e+06	4.84152e+06	1.31539	0.0122195	0.0986287	6.94168	2.79528	up
D387	GC-MS	C9H20O	1-Hexanol, 3,5,5-trimethyl-	3,5,5-三甲基-1-己醇	Alcohol	醇	-	-	3452-97-9	35824.4	39937.6	49250.5	206094	152215	251449	1.2912	0.0281554	0.111998	4.87757	2.28616	up
KMW0204	GC-MS	C8H16O2	Acetic acid, hexyl ester	乙酸己酯	Ester	酯	-	-	142-92-7	2281.13	24162.5	15361.7	115508	43446.1	57556	1.0375	0.108868	0.217493	5.17901	2.37268	up
XMW0605	GC-MS	C10H22	Heptane, 3-ethyl-2-methyl-	3-乙基-2-甲基-庚烷	Hydrocarbons	烃类	-	-	14676-29-0	3180.44	4953.31	15464.5	503858	219111	270026	1.2762	0.0660975	0.16069	42.0792	5.39503	up
KMW0208	GC-MS	C10H22	Decane	癸烷	Hydrocarbons	烃类	-	-	124-18-5	14858.5	32725.1	16349.1	205397	140780	191534	1.2844	0.0103189	0.0967806	8.41057	3.0722	up
XMW0226	GC-MS	C9H18O	2-Heptanone, 4,6-dimethyl-	4,6-二甲基-2-庚酮	Ketone	酮	-	-	19549-80-5	62506.2	67152.5	78164.7	424378	312662	525267	1.30023	0.0285941	0.111998	6.07394	2.60263	up
WMW0100	GC-MS	C9H18O	3-Nonen-1-ol, (E)-	（E）-3-壬-1-醇	Alcohol	醇	-	-	10339-61-4	79046.3	106024	151511	944819	660754	1.21868e+06	1.28527	0.0338241	0.118781	8.39099	3.06884	up
KMW0282	GC-MS	C9H18O	Nonanal	正壬醛	Aldehyde	醛	-	-	124-19-6	39330.4	34345.7	26298.5	10191	9641.08	7075.42	1.28265	0.0184345	0.0992457	0.269143	-1.89355	down
QWM0006	GC-MS	C9H18O	2-Nonanone	2-壬基酮	Ketone	酮	-	-	821-55-6	2697.24	3056.25	3920.35	23100.2	19964.9	32126.2	1.30237	0.0257793	0.111998	7.77264	2.9584	up
WMW0028	GC-MS	C9H18O	4-Heptanone, 2,6-dimethyl-	2,6-二甲基-4-庚酮	Ketone	酮	-	-	108-83-8	1557.96	1235.3	444.565	33521.6	102135	32099.4	1.27466	0.140973	0.255558	51.8114	5.6952	up
XMW1085	GC-MS	C8H14O2	2-Butenoic acid, butyl ester	2-丁酸-丁酯	Ester	酯	-	-	7299-91-4	166389	186320	229297	1.06533e+06	779039	1.29819e+06	1.29394	0.0280255	0.111998	5.39953	2.43283	up
NMW0016	GC-MS	C8H14O2	Acetic acid, cyclohexyl ester	醋酸环己酯	Ester	酯	-	-	622-45-7	401636	206417	235458	4.21015e+06	3.38632e+06	3.39332e+06	1.30307	0.00474297	0.0881501	13.0286	3.70361	up
D309	GC-MS	C8H14O2	Ethyl 2-hexenoate, trans-	2-己酸乙酯	Ester	酯	-	-	27829-72-7	57256.2	64079	81156.8	277889	208518	335273	1.28356	0.0264912	0.111998	4.05784	2.02071	up
XMW0434	GC-MS	C8H14O2	4-Hexen-1-ol, acetate	4-己烯-1-醇，乙酸	Others	其它类	-	-	72237-36-6	81302.8	62927.9	112416	234136	337154	241561	1.2465	0.0180191	0.0992405	3.1672	1.66321	up
XMW0362	GC-MS	C8H14O2	2H-Pyran-2-one, tetrahydro-4,6,6-trimethyl-	四氢-4,6,6-三甲基-2H-吡喃-2-酮	Ketone	酮	-	-	20628-36-8	6256.91	6519.68	9799.34	55794.1	38527.6	73398.6	1.28645	0.039162	0.124475	7.42917	2.8932	up
XMW0638	GC-MS	C8H14O2	2,3'-Bifuran, octahydro-	八氢-2,3'-双呋喃	Heterocyclic compound	杂环化合物	-	-	73373-15-6	20350.7	6358.59	9934.26	176355	76652.7	98342.7	1.24065	0.0714927	0.168966	9.58833	3.26128	up
w07	GC-MS	C11H10	1H-Indene, 1-ethylidene-	1-亚乙基-1H-茚	Hydrocarbons	烃类	-	-	2471-83-2	16639.9	12792.9	14053.5	50494.8	60754.5	90191.3	1.28141	0.0463103	0.13618	4.63227	2.21172	up
XMW0162	GC-MS	C7H10O3	3-Penten-2-one, 4-(acetyloxy)-, (Z)-	（Z）-4-（乙酰氧基）-3-戊烯酮	Ketone	酮	-	-	38365-58-1	614.628	566.186	369.57	4796.28	2598.35	4286.68	1.28423	0.0351444	0.119841	7.53446	2.9135	up
NMW0031	GC-MS	C8H15NO	Hygrine	古豆碱	Heterocyclic compound	杂环化合物	-	-	496-49-1	87750.7	79199	179465	562619	1.09051e+06	847295	1.25864	0.0374255	0.121924	7.21802	2.8516	up
NMW0097	GC-MS	C8H15NO	8-Azabicyclo[3.2.1]octan-3-ol, 8-methyl-, exo-	8-甲基-8-氮杂双环[3.2.1]-3-辛烷醇	Alcohol	醇	-	-	135-97-7	6530.12	5336.74	11258.1	39784.8	27213.8	23872.1	1.23246	0.0308701	0.114844	3.92955	1.97436	up
NMW0091	GC-MS	C8H15NO	8-Azabicyclo[3.2.1]octan-3-ol, 8-methyl-, endo-	8-甲基-8-氮杂双环[3.2.1]辛烷-3-醇	Alcohol	醇	-	-	120-29-6	22740	16514.4	30216	688556	387599	664848	1.3052	0.0285991	0.111998	25.0611	4.64738	up
KMW0251	GC-MS	C9H16O	5-Heptenal, 2,6-dimethyl-	二甲基庚醛	Aldehyde	醛	-	-	106-72-9	170684	186378	253677	604676	459589	729908	1.25344	0.0275964	0.111998	2.93771	1.55469	up
XMW0119	GC-MS	C9H16O	Cyclopentanone, 2-methyl-3-(1-methylethyl)-	2-甲基-3-（1-甲基乙基）-环戊酮	Ketone	酮	-	-	54549-81-4	16455.3	5097.16	11673.7	80456.6	133196	67281.6	1.2386	0.0512858	0.141877	8.45519	3.07984	up
XMW0486	GC-MS	C9H16O	Cyclohexanone, 2,2,6-trimethyl-	2,2,6-三甲基-环己酮	Ketone	酮	-	-	2408-37-9	396041	200156	228325	4.17812e+06	3.36933e+06	3.33528e+06	1.30235	0.00491607	0.0893922	13.1988	3.72234	up
WMW0057	GC-MS	C9H16O	6-Nonenal, (Z)-	（Z）-6-壬醛	Aldehyde	醛	-	-	2277-19-2	45635.7	35603.3	28589	90971.9	86390.9	67690.6	1.22641	0.00888286	0.0959349	2.23125	1.15785	up
KMW0078	GC-MS	C9H16O	8-Nonen-2-one	8-壬烯-2-酮	Ketone	酮	-	-	5009-32-5	12361.9	9865.61	8318.15	2533.51	5807.29	3935.58	1.15687	0.0172308	0.0992405	0.401902	-1.31508	down
KMW0531	GC-MS	C9H16O	3,6-Nonadien-1-ol, (E,Z)-	（E，Z）-3,6-壬二烯-1-醇	Alcohol	醇	-	-	56805-23-3	70498.5	64825.2	67979.3	1.40469e+06	1.34251e+06	1.09855e+06	1.32028	0.00585654	0.092265	18.9163	4.24156	up
XMW0643	GC-MS	C7H12N2O	Butyramide, 2-cyano-2-ethyl-	2-氰基-2-乙基-丁酰胺	Amine	胺	-	-	18705-38-9	38985.7	27230.3	59794.8	218725	106806	288350	1.19002	0.0870586	0.193199	4.87166	2.28441	up
XMW0168	GC-MS	C8H12S	3-Butylthiophene	3-丁基噻吩	Heterocyclic compound	杂环化合物	-	-	34722-01-5	11915.2	8581.06	27219.7	54291.7	85589	56789.7	1.18535	0.0206361	0.102135	4.1217	2.04324	up
XMW0528	GC-MS	C8H12S	Thiophene, 2-butyl-	2-丁基噻吩	Heterocyclic compound	杂环化合物	-	-	1455-20-5	15538.5	13276.5	14212.4	44618.6	27309.7	31301	1.24426	0.0596579	0.152745	2.39915	1.26253	up
XMW1212	GC-MS	C7H8O3	2-Furancarboxylic acid, ethyl ester	2-呋喃甲酸乙酯	Ester	酯	-	-	614-99-3	209280	225495	279354	1.46278e+06	1.05784e+06	1.7743e+06	1.29751	0.027835	0.111998	6.0142	2.58837	up
D264	GC-MS	C10H18	1,6-Octadiene, 3,7-dimethyl-	3,7-二甲基辛基-1,6-二烯	Terpenoids	萜类	-	-	2436-90-0	49768.7	75334.8	233867	6.71622e+06	3.42315e+06	3.66724e+06	1.27832	0.0511805	0.141877	38.4617	5.26535	up
XMW0202	GC-MS	C10H18	cis-2,6-Dimethyl-2,6-octadiene	顺式-2,6-二甲基-2,6-辛二烯	Hydrocarbons	烃类	-	-	2492-22-0	233418	47397.3	134552	8.30683e+06	3.94617e+06	5.30369e+06	1.27588	0.0470432	0.136311	42.2679	5.40149	up
XMW0902	GC-MS	C10H18	2,6-Dimethyl-2-trans-6-octadiene	2,6-二甲基-2-反式-6-辛二烯	Terpenoids	萜类	-	-	2609-23-6	506029	463825	553512	7.22765e+07	3.97705e+07	4.65753e+07	1.31796	0.0339189	0.118781	104.126	6.70219	up
XMW0900	GC-MS	C9H14O	3-Cyclohexen-1-one, 3,5,5-trimethyl-	3,5,5-三甲基-3-环己烯-1-酮	Ketone	酮	-	-	471-01-2	165005	92746.6	127782	1.58964e+06	1.32695e+06	1.25238e+06	1.30613	0.00500918	0.0901652	10.8135	3.43476	up
XMW0008	GC-MS	C9H14O	Isophorone	异佛尔酮	Ketone	酮	-	-	78-59-1	18422.8	20530.4	41021.7	190664	227410	209286	1.2855	0.000308213	0.042654	7.84446	2.97167	up
D364	GC-MS	C7H10N2O	2-Ethoxy-3-methylpyrazine	2-乙氧基-3-甲基吡嗪	Heterocyclic compound	杂环化合物	-	-	32737-14-7	4.39281e+06	8.02723e+06	9.97844e+06	3.4099e+07	2.62043e+07	4.18085e+07	1.24558	0.0180811	0.0992405	4.55887	2.18868	up
D296	GC-MS	C7H10N2O	2-Ethyl-3-methoxypyrazine	2-乙基-3-甲氧基吡嗪	Heterocyclic compound	杂环化合物	-	-	25680-58-4	36087.1	67843.2	90150.8	337992	259040	416033	1.24707	0.0177974	0.0992405	5.2198	2.384	up
NMW0061	GC-MS	C7H7NO2	1-methyl-2-nitro-Benzene	1-甲基-2-硝基苯	Aromatics	芳烃	-	-	88-72-2	1357.73	1543.88	3998.54	16975	11343.4	10700.7	1.22666	0.0201978	0.101539	5.65481	2.49948	up
KMW0199	GC-MS	C10H16	.beta.-Myrcene	月桂烯	Terpenoids	萜类	-	-	123-35-3	268522	247082	296939	3.25656e+07	1.82939e+07	2.12315e+07	1.3179	0.0319376	0.117346	88.7226	6.47123	up
XMW0004	GC-MS	C10H16	Bicyclo[3.1.1]heptane, 6,6-dimethyl-2-methylene-, (1S)-	（1S）-6,6-二甲基-2-亚甲基-双环[3.1.1]庚烷	Terpenoids	萜类	-	-	18172-67-3	1.75189e+06	2.45451e+06	7.87116e+06	2.34788e+08	1.18919e+08	1.28149e+08	1.27988	0.0516578	0.141877	39.8968	5.3182	up
XMW0437	GC-MS	C10H16	1,5-Cyclooctadiene, 1,6-dimethyl-	1,6-二甲基-1,5-环辛二烯	Hydrocarbons	烃类	-	-	3760-13-2	91953.2	73381.6	56540.1	33182.4	33998.5	31828.6	1.24528	0.056552	0.148069	0.44624	-1.16411	down
KMW0172	GC-MS	C10H16	Camphene	莰烯	Terpenoids	萜类	-	-	79-92-5	134774	58898.1	113521	1.17739e+07	3.71533e+07	1.04009e+07	1.2992	0.152085	0.269571	193.13	7.59343	up
KMW0220	GC-MS	C10H16	3-Carene	δ-3-蒈烯	Terpenoids	萜类	-	-	13466-78-9	2.08931e+07	4.32861e+07	1.74926e+07	2.6614e+08	1.85566e+08	2.48194e+08	1.27879	0.00833381	0.092265	8.56966	3.09924	up
KMW0259	GC-MS	C10H16	.gamma.-Terpinene	γ-萜类品烯	Terpenoids	萜类	-	-	99-85-4	6.24976e+07	1.10033e+08	1.32786e+08	3.82417e+08	3.07932e+08	4.52926e+08	1.2409	0.0100663	0.0967806	3.74456	1.9048	up
KMW0252	GC-MS	C10H16	1,3,7-Octatriene, 3,7-dimethyl-	α-柠檬烯	Terpenoids	萜类	-	-	502-99-8	1.65191e+07	1.84658e+07	2.12893e+07	1.16133e+08	8.45289e+07	1.3886e+08	1.30074	0.025969	0.111998	6.03335	2.59296	up
XMW0678	GC-MS	C10H16	1,3-Cyclohexadiene, 1,5,5,6-tetramethyl-	1,5,5,6-四甲基-1,3-环己二烯	Terpenoids	萜类	-	-	514-94-3	299724	50494.1	149255	1.30817e+07	3.7626e+06	5.61281e+06	1.25503	0.123835	0.23501	44.9616	5.49062	up
WMW0023	GC-MS	C10H16	(+)-alpha-Pinene	（+）-α-P烯	Terpenoids	萜类	-	-	7785-70-8	17978	21039.6	12474.2	947589	1.64346e+06	1.00782e+06	1.31459	0.0336447	0.118781	69.892	6.12705	up
KMW0217	GC-MS	C10H16	D-Limonene	（+）-柠檬烯	Terpenoids	萜类	-	-	5989-27-5	79900.7	42766.7	31596.5	287389	409966	233578	1.24842	0.0307476	0.114844	6.03467	2.59328	up
KMW0148	GC-MS	C10H16	.alpha.-Pinene	α-蒎烯	Terpenoids	萜类	-	-	80-56-8	301817	183905	303363	3.10899e+07	9.42827e+06	1.42925e+07	1.29923	0.111088	0.220199	69.4611	6.11813	up
KMW0198	GC-MS	C10H16	.alpha.-Phellandrene 1	（+）-α-芹烯1	Terpenoids	萜类	-	-	99-83-2	2.08798e+07	4.32696e+07	1.74818e+07	2.66111e+08	1.85561e+08	2.48124e+08	1.27879	0.00832418	0.092265	8.57266	3.09974	up
XMW0416	GC-MS	C10H16	1,3-Cyclohexadiene, 5-butyl-	5-丁基-1,3-环己二烯	Hydrocarbons	烃类	-	-	30168-57-1	5.69747e+06	2.56955e+06	2.61073e+06	6.42631e+07	4.96117e+07	5.11819e+07	1.29567	0.00602806	0.092265	15.1738	3.92351	up
KMW0223	GC-MS	C10H16	1,3-Cyclohexadiene, 1-methyl-4-(1-methylethyl)-	α-萜类品烯	Terpenoids	萜类	-	-	99-86-5	1.25951e+06	2.65426e+06	1.0415e+06	2.29675e+07	1.42418e+07	2.07898e+07	1.28341	0.0183222	0.0992405	11.7045	3.54899	up
XMW0084	GC-MS	C10H16	2,4,6-Octatriene, 2,6-dimethyl-	2,6-二甲基-2,4,6-辛三烯	Terpenoids	萜类	-	-	673-84-7	111722	43737.9	50923.8	361229	308327	272049	1.23423	0.00214793	0.0722192	4.56239	2.18979	up
XMW0521	GC-MS	C10H16	1,7-Octadiene, 2-methyl-6-methylene-	2-甲基-6-亚甲基-1,7-辛二烯	Terpenoids	萜类	-	-	1686-30-2	31948.3	10874.7	19917.9	1.29333e+06	495962	668166	1.28736	0.0809638	0.184027	39.1684	5.29162	up
D342	GC-MS	C10H16	2,4,6-Octatriene, 2,6-dimethyl-, (E,E)-	(E,E)-2,6-二甲基-2,4,6-辛三烯	Terpenoids	萜类	-	-	3016-19-1	430897	496714	588737	3.59054e+06	2.28588e+06	4.74519e+06	1.28511	0.0501148	0.140195	7.00473	2.80833	up
XMW0709	GC-MS	C10H16	Cyclohexane, 1-methylene-4-(1-methylethenyl)-	1-亚甲基-4-（1-甲基乙烯基）-环己烷	Terpenoids	萜类	-	-	499-97-8	2.08792e+07	4.32691e+07	1.74802e+07	2.66111e+08	1.85561e+08	2.48129e+08	1.27879	0.0083243	0.092265	8.573	3.0998	up
XMW0023	GC-MS	C10H16	4-methyl-1-(1-methylethyl)-Bicyclo[3.1.0]hex-2-ene	4-甲基-1-（1-甲基乙基）-双环[3.1.0]己-2-烯	Hydrocarbons	烃类	-	-	28634-89-1	136114	57070.2	113818	1.21177e+07	3.72082e+07	1.04255e+07	1.29899	0.149347	0.267205	194.628	7.60458	up
XMW0771	GC-MS	C10H16	1,5-Cyclooctadiene, 3,4-dimethyl-	3,4-二甲基-1,5-环辛二烯	Terpenoids	萜类	-	-	21284-05-9	405597	440304	493045	2.86466e+06	2.05065e+06	3.37432e+06	1.30258	0.0261494	0.111998	6.19117	2.63021	up
KMW0235	GC-MS	C10H16	1,3,6-Octatriene, 3,7-dimethyl-, (Z)-	（Z）-BETA-辛二烯	Terpenoids	萜类	-	-	3338-55-4	1.62781e+07	7.94484e+06	7.12286e+06	1.8044e+08	1.35956e+08	1.45473e+08	1.29566	0.00671043	0.092265	14.7346	3.88114	up
XMW0417	GC-MS	C10H16	Cyclohexene, 4-methyl-1-(1-methylethenyl)-	4-甲基-1-（1-甲基乙烯基）-环己烯	Hydrocarbons	烃类	-	-	586-67-4	510393	383829	528969	1.34589e+06	952428	2.50203e+06	1.16824	0.135246	0.24887	3.37295	1.75401	up
D316	GC-MS	C10H16	Adamantane	金刚烷	Hydrocarbons	烃类	-	-	281-23-2	921027	619156	755964	340117	245935	315532	1.26027	0.0245946	0.111998	0.392651	-1.34868	down
XMW0452	GC-MS	C10H16	2,4,6-Octatriene, 3,4-dimethyl-	3,4-二甲基-2,4,6-辛三烯	Hydrocarbons	烃类	-	-	57396-75-5	2.39415e+06	1.59561e+06	1.90158e+06	304929	289391	288571	1.31304	0.0188212	0.100137	0.149863	-2.73829	down
XMW0632	GC-MS	C10H16	Bicyclo[3.1.1]hept-2-ene, 3,6,6-trimethyl-	3,6,6-三甲基-双环[3.1.1]庚-2-烯	Terpenoids	萜类	-	-	4889-83-2	1.75019e+06	2.45431e+06	7.87178e+06	2.34572e+08	1.18654e+08	1.27928e+08	1.27979	0.0518264	0.142084	39.843	5.31625	up
WMW0215	GC-MS	C10H16	.beta.-Ocimene	β-奥西米尼	Terpenoids	萜类	-	-	13877-91-3	1.62561e+07	7.91988e+06	7.09442e+06	1.80269e+08	1.35858e+08	1.45238e+08	1.29556	0.00671024	0.092265	14.7541	3.88304	up
WMW0201	GC-MS	C10H16	Bicyclo[2.2.1]heptane, 7,7-dimethyl-2-methylene-	7,7-二甲基-2-亚甲基-双环[2.2.1]庚烷	Terpenoids	萜类	-	-	471-84-1	1.73051e+06	2.45191e+06	7.84777e+06	2.32614e+08	1.18341e+08	1.27236e+08	1.27966	0.0511431	0.141877	39.7492	5.31285	up
XMW1064	GC-MS	C8H12N2	1,4-Methano-1H-Cyclopropa[d]pyridazine, 4,4a,5,5a-tetrahydro-6,6-dimethyl-, (1.alpha.,4.alpha.,4a.alpha.,5a.alpha.)-	（1α，4α，4aα，5a.α 。）-4,4a，5,5a-四氢-6,6-二甲基-1,4-甲基-1H-环丙[d]哒嗪	Heterocyclic compound	杂环化合物	-	-	109746-10-3	101313	100733	188498	4.73125e+06	2.76765e+06	5.0495e+06	1.30498	0.0294516	0.112624	32.1305	5.00587	up
D335	GC-MS	C8H12N2	Pyrazine, (2-methylpropyl)-	2-甲基丙基吡嗪	Heterocyclic compound	杂环化合物	-	-	29460-92-2	239567	191879	268124	692605	487285	1.18521e+06	1.19136	0.113891	0.223746	3.3808	1.75736	up
KMW0244	GC-MS	C8H12N2	Pyrazine, 2-methyl-5-(1-methylethyl)-	5-异丙基-2-甲基吡嗪	Heterocyclic compound	杂环化合物	-	-	13925-05-8	1.3061e+07	2.4704e+07	3.10222e+07	1.07969e+08	8.36518e+07	1.30391e+08	1.24432	0.0148865	0.0986287	4.68127	2.2269	up
D414	GC-MS	C9H12O	Bicyclo[3.1.0]hex-3-en-2-one, 5-(1-methylethyl)-	脱氢沙棘酮	Ketone	酮	-	-	36262-12-1	7.18079e+06	4.85299e+06	5.6947e+06	2.04984e+06	1.28221e+06	1.3377e+06	1.27446	0.0149133	0.0986287	0.263405	-1.92465	down
WMW0081	GC-MS	C9H12O	cis-2-(2-Pentenyl)furan	顺-2-（2-戊烯基）呋喃	Heterocyclic compound	杂环化合物	-	-	70424-13-4	726886	1.53111e+06	630979	1.27665e+07	8.03023e+06	1.1588e+07	1.28473	0.0172238	0.0992405	11.2097	3.48668	up
XMW0603	GC-MS	C9H12O	Benzene, 1-ethyl-4-methoxy-	1-乙基-4-甲氧基-苯	Aromatics	芳烃	-	-	1515-95-3	2.41712e+06	1.61692e+06	1.92236e+06	404862	379059	362606	1.30934	0.0202569	0.101539	0.192487	-2.37717	down
XMW1389	GC-MS	C9H12O	2,3-Dimethylanisole	2,3-二甲基苯甲醚	Ether	醚	-	-	2944-49-2	212611	245341	296044	1.77879e+06	1.1178e+06	2.36593e+06	1.28258	0.0524133	0.143068	6.97951	2.80313	up
D253	GC-MS	C7H8N2O	2-Acetyl-3-methylpyrazine	2-乙酰基-3-甲基吡嗪	Heterocyclic compound	杂环化合物	-	-	23787-80-6	24156	17500.7	48820.2	83434.1	61117.1	67255.6	1.09367	0.0303336	0.113987	2.34101	1.22713	up
NMW0025	GC-MS	C8H8O2	Acetic acid, phenyl ester	醋酸苯酯	Ester	酯	-	-	122-79-2	7.68364e+06	1.42707e+07	1.77933e+07	6.09407e+07	4.71572e+07	7.37381e+07	1.24504	0.0155021	0.0986287	4.57476	2.1937	up
XMW0019	GC-MS	C8H8O2	Acetophenone, 4'-hydroxy-	4'-羟基-苯乙酮	Ketone	酮	-	-	99-93-4	1.05899e+07	1.08336e+07	1.04797e+07	6.19335e+07	7.35051e+07	8.8269e+07	1.31456	0.0138996	0.0986287	7.01206	2.80984	up
XMW1318	GC-MS	C8H8O2	2-Methyl-3(2-furyl)acrolein	2-甲基-3（2-呋喃基）丙烯醛	Heterocyclic compound	杂环化合物	-	-	874-66-8	924561	624042	758166	348967	250253	326854	1.25621	0.0240782	0.111159	0.401459	-1.31667	down
XMW1063	GC-MS	C4H4N6	4,4'-Bitriazolyl	4,4'-双氮唑基	Heterocyclic compound	杂环化合物	-	-	16227-15-9	220787	108289	348655	1.46391e+06	452951	2.02047e+06	1.09532	0.138479	0.253357	5.80958	2.53843	up
NMW0157	GC-MS	C8H9NO	Acetamide, N-phenyl-	N-苯基-乙酰胺	Amine	胺	-	-	103-84-4	838900	927338	1.07082e+06	3.41687e+06	1.49688e+06	2.68822e+06	1.16106	0.102884	0.212199	2.67953	1.42198	up
KMW0425	GC-MS	C7H5NS	Benzothiazole	苯并噻唑	Heterocyclic compound	杂环化合物	-	-	95-16-9	7753.26	5366.26	55269.3	171915	69390.6	63909.5	1.02331	0.13992	0.255421	4.46294	2.158	up
XMW0037	GC-MS	C10H14	Benzene, 1-ethyl-3,5-dimethyl-	1-乙基-3,5-二甲基-苯	Aromatics	芳烃	-	-	934-74-7	3.17614e+06	6.03378e+06	7.56409e+06	2.6484e+07	2.04029e+07	3.20605e+07	1.24381	0.0157219	0.0986287	4.70653	2.23466	up
XMW0659	GC-MS	C10H14	Benzene, n-butyl-	正丁基苯	Aromatics	芳烃	-	-	104-51-8	7.15136e+06	8.0218e+06	9.22374e+06	5.21404e+07	3.72486e+07	6.26976e+07	1.29976	0.0281084	0.111998	6.23385	2.64012	up
XMW0366	GC-MS	C10H14	Benzene, 1,2,3,5-tetramethyl-	1,2,3,5-四甲基苯	Aromatics	芳烃	-	-	527-53-7	261532	248699	172299	2.61563e+06	833820	1.11382e+06	1.22401	0.143979	0.258639	6.68582	2.74111	up
KMW0234	GC-MS	C10H14	p-Cymene	对异丙基苯	Aromatics	芳烃	-	-	99-87-6	92888.7	69382.5	58688.5	261590	102901	140968	1.0348	0.181428	0.301029	2.28756	1.19381	up
NMW0794	GC-MS	C10H14	Benzene, (1-methylpropyl)-	（1-甲基丙基）-苯	Aromatics	芳烃	-	-	135-98-8	481142	1.01197e+06	389698	8.20898e+06	5.19842e+06	7.43737e+06	1.28168	0.0163481	0.0992405	11.0711	3.46873	up
KMW0273	GC-MS	C10H14	Benzene, 1,2,4,5-tetramethyl-	杜罗尔	Aromatics	芳烃	-	-	95-93-2	262376	242579	166059	2.61563e+06	833820	1.11382e+06	1.22413	0.143262	0.258342	6.80057	2.76566	up
XMW0011	GC-MS	C10H14	Benzene, 1,4-diethyl-	1,4-二乙基-苯	Aromatics	芳烃	-	-	105-05-5	6.50064e+06	2.49858e+06	7.97549e+06	1.05366e+07	1.14454e+07	2.16916e+07	1.00315	0.114886	0.225221	2.57287	1.36338	up
KMW0431	GC-MS	C8H10N2	5H-5-Methyl-6,7-dihydrocyclopentapyrazine	二氢甲基环戊哌嗪	Heterocyclic compound	杂环化合物	-	-	23747-48-0	1.89424e+06	2.61826e+06	3.73598e+06	2.30225e+07	1.55361e+07	2.94754e+07	1.28135	0.0364947	0.1212	8.24807	3.04406	up
D173	GC-MS	C9H10O	BenzeneacetAldehyde, 4-methyl-	4-甲基-苯乙醛	Aldehyde	醛	-	-	104-09-6	2275.93	3455.54	5645.53	20995.1	12982.4	28980.9	1.22543	0.0594305	0.152381	5.53384	2.46828	up
XMW1378	GC-MS	C9H10O	4,6-Octadiyn-3-one, 2-methyl-	2-甲基-4,6-辛二炔-3-酮	Ketone	酮	-	-	29743-33-7	17365.9	13067.6	35368.1	102505	146649	126475	1.24891	0.00530694	0.0909479	5.7085	2.51311	up
XMW0717	GC-MS	C9H10O	Ethanone, 1-(2-methylphenyl)-	1-（2-甲基苯基）-乙酮	Ketone	酮	-	-	577-16-2	207358	302615	482258	1.93327e+06	1.20486e+06	1.66081e+06	1.25007	0.0170161	0.0992405	4.83652	2.27397	up
XMW0826	GC-MS	C7H6N2O	3-Methylisoxazolo[4,5-b]pyridine	3-甲基异唑并[4,5-b]吡啶	Heterocyclic compound	杂环化合物	-	-	83988-39-0	221399	138120	165905	1.05499e+06	867970	1.31185e+06	1.29482	0.016922	0.0992405	6.15658	2.62213	up
XMW0098	GC-MS	C8H6O2	1,4-BenzenedicarboxAldehyde	1,4-苯二甲醛	Aldehyde	醛	-	-	623-27-8	8894.57	9	9	16415.5	31249.4	68300.5	1.0311	0.142373	0.257311	13.0114	3.70171	up
XMW0901	GC-MS	C5H7ClO2	3-Chloro-2,4-pentanedione	3-氯-2,4-戊二酮	Halogenated hydrocarbons	卤代烃	-	-	1694-29-7	1236.77	593.579	1440.42	47205.3	19960.3	25391.7	1.28904	0.0699844	0.166951	28.2983	4.82264	up
XMW0657	GC-MS	C8H7NO	Benzoxazole, 2-methyl-	2-甲基-苯并恶唑	Heterocyclic compound	杂环化合物	-	-	95-21-6	84468.8	115308	163658	1.04675e+06	689865	1.33507e+06	1.28184	0.0383976	0.123733	8.45181	3.07926	up
XMW1193	GC-MS	C7H16O2	1,2-Hexanediol, 2-methyl-	2-甲基-1,2-己二醇	Alcohol	醇	-	-	56255-50-6	30106.3	55941.4	71405.6	245517	189015	301214	1.24326	0.0174058	0.0992405	4.67279	2.22429	up
NMW0010	GC-MS	C10H12	Dicyclopentadiene	双环戊二烯	Terpenoids	萜类	-	-	77-73-6	249970	527935	210942	4.13897e+06	2.56186e+06	3.70956e+06	1.28088	0.0181807	0.0992405	10.5278	3.39613	up
XMW0490	GC-MS	C10H12	1-Methyl-2-phenylcyclopropane	1-甲基-2-苯基环丙烷	Aromatics	芳烃	-	-	3145-76-4	711398	1.33911e+06	1.67799e+06	5.89199e+06	4.49097e+06	7.12123e+06	1.2441	0.0167552	0.0992405	4.69471	2.23104	up
XMW0447	GC-MS	C10H12	Benzene, (2-methyl-1-propenyl)-	（2-甲基-1-丙烯基）-苯	Aromatics	芳烃	-	-	768-49-0	86443	70086.1	94793.1	172559	128656	267933	1.13447	0.119228	0.230189	2.26462	1.17927	up
KMW0219	GC-MS	C8H18O	1-Hexanol, 2-ethyl-	2-乙基己醇	Alcohol	醇	-	-	104-76-7	2414.8	998.223	1796.78	12999	30552.4	16967.6	1.26581	0.0731457	0.171658	11.6164	3.53809	up
KMW0202	GC-MS	C8H18O	3-Octanol	3-辛醇	Alcohol	醇	-	-	589-98-0	2463.65	2714.48	3495.02	272444	163342	179948	1.31729	0.0269895	0.111998	70.9931	6.14961	up
KMW0194	GC-MS	C8H18O	2-Octanol	2-辛醇	Alcohol	醇	-	-	123-96-6	4597.15	7127.93	3974.7	27763.5	21395	27157.2	1.28677	0.00350114	0.0841302	4.86095	2.28124	up
XMW1397	GC-MS	C10H10	2-Methylindene	2-甲基茚	Aromatics	芳烃	-	-	2177-47-1	6400.21	11256.3	14511.5	50048.7	40559.7	63948.3	1.25227	0.017883	0.0992405	4.80468	2.26444	up
WMW0058	GC-MS	C8H16O	5-Hepten-2-ol, 6-methyl-	6-甲基-5-庚-2-醇	Alcohol	醇	-	-	1569-60-4	110458	102165	108565	1.27658e+07	5.22045e+06	6.22546e+06	1.31144	0.0780425	0.180145	75.3815	6.23614	up
XMW0642	GC-MS	C8H16O	Cyclohexanol, 3,5-dimethyl-	3,5-二甲基环己醇	Alcohol	醇	-	-	5441-52-1	8221.61	4214.23	9878	30781.9	19957.2	27441.3	1.20473	0.0138841	0.0986287	3.50367	1.80887	up
XMW0578	GC-MS	C8H16O	Furan, 2-butyltetrahydro-	2-丁基四氢-呋喃	Heterocyclic compound	杂环化合物	-	-	1004-29-1	19841.6	38533.7	22517.4	190643	128296	180060	1.2825	0.0127705	0.0986287	6.16866	2.62496	up
KMW0187	GC-MS	C8H16O	2-Octanone	2-辛酮	Ketone	酮	-	-	111-13-7	9308.78	18581	10769.5	129084	81467.4	115479	1.28956	0.0179061	0.0992405	8.43341	3.07612	up
WMW0127	GC-MS	C8H16O	3-Octen-1-ol, (Z)-	（Z）-3-辛烯-1-醇	Alcohol	醇	-	-	20125-84-2	2.13714e+06	3.68021e+06	4.50596e+06	1.33978e+07	1.04872e+07	1.61782e+07	1.24229	0.0152193	0.0986287	3.88085	1.95637	up
w01	GC-MS	C8H16O	Cyclooctyl Alcohol	环辛醇	Alcohol	醇	-	-	696-71-9	4623.12	4010.44	8790.87	82426.8	102342	97027.7	1.30168	0.00291808	0.0800295	16.1725	4.01547	up
XMW1237	GC-MS	C7H12O2	3-Pentenoic Acid, 2,2-dimethyl-	2,2-二甲基-3-戊烯酸	Acid	酸	-	-	16642-52-7	16426.8	36575.7	34084.5	42216.5	130105	81214.3	1.03151	0.154209	0.270729	2.91129	1.54166	up
NMW0782	GC-MS	C7H12O2	2-Butenoic acid, 2-methyl-, ethyl ester	2-甲基2-丁酸乙酯	Ester	酯	-	-	55514-48-2	4441.78	3260.81	7341.93	198101	60869.2	91349.3	1.2755	0.115018	0.225232	23.2855	4.54136	up
NMW0230	GC-MS	C5H8N2O2	5,6-Dihydro-5-methyluracil	5,6-二氢-5-甲基尿嘧啶	Heterocyclic compound	杂环化合物	-	-	696-04-8	177188	271107	228435	603101	475202	596510	1.26224	0.00433812	0.0864396	2.47486	1.30735	up
KMW0207	GC-MS	C6H8OS	2-Furanmethanethiol, 5-methyl-	甲基糠基硫醇	Heterocyclic compound	杂环化合物	-	-	59303-05-8	110458	109133	119299	1.28597e+07	5.22882e+06	6.22546e+06	1.31107	0.0792698	0.181567	71.7458	6.16482	up
XMW0405	GC-MS	C7H13NO	4-Piperidinone, 1,3-dimethyl-	1,3-二甲基-4-哌啶酮	Ketone	酮	-	-	4629-80-5	21892.9	41109.6	51169.2	173019	131957	204909	1.24189	0.0144083	0.0986287	4.46595	2.15897	up
KMW0184	GC-MS	C6H9NS	Thiazole, 2,4,5-trimethyl-	三甲基噻唑	Heterocyclic compound	杂环化合物	-	-	13623-11-5	1529.12	3317.24	3469.46	3825.68	11319.9	7240.37	1.00606	0.154672	0.271017	2.69197	1.42866	up
w41	GC-MS	C8H14O	3-Octen-2-one, (E)-	（E）-3-辛烯酮	Ketone	酮	-	-	18402-82-9	8395.75	2821.73	5338.47	792603	1.19996e+06	629021	1.30761	0.0361451	0.121053	158.347	7.30695	up
KMW0230	GC-MS	C8H14O	3-Octen-2-one	3-辛烯-2-酮	Ketone	酮	-	-	1669-44-9	421807	189965	228817	4.04267e+06	3.33456e+06	3.33105e+06	1.29692	0.00281592	0.0800295	12.739	3.67118	up
KMW0243	GC-MS	C8H14O	(E)-2-Octenal	E-2-辛烯醛	Aldehyde	醛	-	-	2548-87-0	3.39256e+06	5.71414e+06	6.98114e+06	2.16457e+07	1.62987e+07	2.65012e+07	1.24387	0.0218501	0.105235	4.00586	2.00211	up
XMW1454	GC-MS	C6H6O3	Isomaltol	1-（3-羟基呋喃-2-基）乙酮	Ketone	酮	-	-	3420-59-5	44138.1	91471.8	85549.1	103632	309506	191246	1.02554	0.159065	0.27654	2.73281	1.45038	up
XMW0028	GC-MS	C8H15N	Pyridine, 2,3,4,5-tetrahydro-6-propyl-	2,3,4,5-四氢-6-丙基-吡啶	Heterocyclic compound	杂环化合物	-	-	1604-01-9	9	9	9	16026.7	23813.2	12213.3	1.32056	0.0366268	0.121229	1927.9	10.9128	up
KMW0221	GC-MS	C7H11NO	2-Acetyl-1,4,5,6-tetrahydropyridine	2-乙酰基1,4,5,6-四氢吡啶	Heterocyclic compound	杂环化合物	-	-	25343-57-1	402316	730283	915086	3.18055e+06	2.42845e+06	3.90625e+06	1.24674	0.018979	0.100137	4.64683	2.21625	up
XMW1124	GC-MS	C7H11NO	2-Azabicyclo[3.2.1]octan-3-one	2-氮杂双环[3.2.1] 辛烷-3-酮	Ketone	酮	-	-	26396-67-8	7021	4584.87	4908.26	239039	364195	192113	1.31248	0.0369529	0.121495	48.1615	5.58981	up
WMW0099	GC-MS	C9H16	Cyclopentene, 1-butyl-	1-丁基-环戊烯	Hydrocarbons	烃类	-	-	2423-01-0	91129.5	127214	410003	1.33016e+07	6.30227e+06	6.78687e+06	1.27906	0.0623614	0.156518	42.0004	5.39233	up
WMW0126	GC-MS	C9H16	1,3-Hexadiene, 3-ethyl-2-methyl-	3-乙基-2-甲基-1,3-己二烯	Hydrocarbons	烃类	-	-	61142-36-7	18463.7	7939.26	10883.5	1.6931e+06	2.4728e+06	1.30486e+06	1.31149	0.0341129	0.118781	146.723	7.19695	up
D321	GC-MS	C6H8N2O	Pyrazine, 2-methoxy-3-methyl-	2-甲氧基-3-甲基吡嗪	Heterocyclic compound	杂环化合物	-	-	2847-30-5	1426.86	2037.14	2626.84	11295.8	9127.37	10167.1	1.29022	0.00120198	0.0585686	5.02233	2.32836	up
XMW0289	GC-MS	C7H8O2	2-Acetyl-5-methylfuran	2-乙酰基-5-甲基呋喃	Heterocyclic compound	杂环化合物	-	-	1193-79-9	294102	223464	239724	1.79525e+06	1.34248e+06	1.27091e+06	1.30626	0.0164171	0.0992405	5.82161	2.54142	up
KMW0258	GC-MS	C7H8O2	2-methoxy-Phenol	愈创木酚	Phenol	酚	-	-	90-05-1	59562	48197.3	97256.3	275613	539167	389469	1.25836	0.0442428	0.132989	5.87394	2.55433	up
D210	GC-MS	C6H5NO2	Benzene, nitro-	硝基苯	Aromatics	芳烃	-	-	98-95-3	28006.5	16444	26667.8	64906.1	38298.7	49234.9	1.1327	0.0539597	0.14456	2.14347	1.09995	up
XMW1229	GC-MS	C9H14	Bicyclo(3.3.1)non-2-ene	双环（3.3.1）非-2-烯	Hydrocarbons	烃类	-	-	6671-66-5	13156.7	7780.01	10372.1	1.04231e+06	3.26013e+06	905322	1.30204	0.152177	0.269571	166.336	7.37795	up
KMW0183	GC-MS	C7H10N2	Pyrazine, 2-ethyl-5-methyl-	乙基甲基吡嗪	Heterocyclic compound	杂环化合物	-	-	13360-64-0	1.259e+06	2.65263e+06	1.0408e+06	2.29626e+07	1.42395e+07	2.07769e+07	1.28342	0.0183117	0.0992405	11.7072	3.54932	up
KMW0190	GC-MS	C7H10N2	Pyrazine, trimethyl-	三甲基吡嗪	Heterocyclic compound	杂环化合物	-	-	14667-55-1	222052	455377	192276	2.90712e+06	1.9471e+06	2.69979e+06	1.28027	0.0117534	0.0986287	8.68572	3.11865	up
KMW0192	GC-MS	C8H10O	Benzene, 1-methoxy-2-methyl-	2-甲基苯甲醚	Aromatics	芳烃	-	-	578-58-5	135101	277379	125863	2.4448e+06	1.48454e+06	2.1953e+06	1.28814	0.0205569	0.102135	11.3768	3.50803	up
NMW0022	GC-MS	C8H10O	Benzenemethanol, .alpha.-methyl-	α-甲基-苯甲醇	Alcohol	醇	-	-	98-85-1	2.27205e+07	4.07955e+07	5.01037e+07	1.6269e+08	1.25926e+08	1.97417e+08	1.24452	0.0163902	0.0992405	4.27772	2.09684	up
KMW0703	GC-MS	C8H10O	Phenol, 4-ethyl-	对氢乙苯	Aromatics	芳烃	-	-	123-07-9	46486.4	38359.9	51248.7	367697	265649	413661	1.30579	0.0194991	0.100137	7.69321	2.94359	up
KMW0214	GC-MS	C6H6N2O	Acetylpyrazine	乙酰吡嗪	Heterocyclic compound	杂环化合物	-	-	22047-25-2	416.577	624.969	2076.55	5864.79	5509.99	4435.76	1.17105	0.00375303	0.0841302	5.07057	2.34215	up
XMW3734	GC-MS	C7H6O2	2-hydroxy-BenzAldehyde	2-羟基苯甲醛	Aldehyde	醛	-	-	90-02-8	211568	236711	273056	1.68941e+06	1.17699e+06	2.04407e+06	1.29957	0.0304477	0.113987	6.80748	2.76712	up
WMW0085	GC-MS	C4H10S2	Diethyl diSulfur compounds	二乙基二硫	Sulfur compounds	含硫化合物	-	-	110-81-6	2926.37	1909.5	2763.78	28030.8	43161.6	31266.5	1.30785	0.0201111	0.101539	13.4821	3.75297	up
NMW0044	GC-MS	C8H11N	BenzenAmine, N-ethyl-	N-乙基-苯胺	Amine	胺	-	-	103-69-5	5042.65	5371.82	1320.41	13492.4	10724.3	15451.7	1.09293	0.00793633	0.092265	3.38038	1.75719	up
XMW0522	GC-MS	C8H11N	Pyridine, 3-propyl-	3-丙基吡啶	Heterocyclic compound	杂环化合物	-	-	4673-31-8	520493	96024.1	266997	2.73273e+07	9.90352e+06	1.52688e+07	1.27376	0.079081	0.181367	59.4213	5.89291	up
XMW1385	GC-MS	C6H7N3	3-Imidazol-1-ylpropanenitrile	3-咪唑-1-基丙腈	Heterocyclic compound	杂环化合物	-	-	23996-53-4	158365	135924	222202	3.27352e+06	3.71431e+06	3.32476e+06	1.3153	0.00133413	0.0585686	19.9667	4.31952	up
XMW0711	GC-MS	C7H7NO	Formamide, N-phenyl-	N-苯基-甲酰胺	Aromatics	芳烃	-	-	103-70-8	16101.6	22672.5	35332.6	891472	525474	934619	1.30423	0.0278137	0.111998	31.7322	4.98787	up
NMW0789	GC-MS	C9H12	Benzene, 1-ethyl-3-methyl-	1-乙基-3-甲基-苯	Aromatics	芳烃	-	-	620-14-4	10908.2	4399.46	9316.53	958033	3.1674e+06	848892	1.29696	0.160563	0.27833	202.01	7.65828	up
NMW0012	GC-MS	C9H12	Benzene, 1,2,3-trimethyl-	1,2,3-三甲基苯	Aromatics	芳烃	-	-	526-73-8	32092.2	26460.1	29513	240718	203840	279573	1.31467	0.0101518	0.0967806	8.22265	3.0396	up
KMW0150	GC-MS	C9H12	Benzene, 1,2,4-trimethyl-	甲基对二甲苯	Aromatics	芳烃	-	-	95-63-6	91855	82960	98348	1.69376e+07	8.44929e+06	9.76145e+06	1.31688	0.047832	0.137478	128.672	7.00755	up
NMW0027	GC-MS	C8H8O	BenzAldehyde, 3-methyl-	3-甲基苯甲醛	Aldehyde	醛	-	-	620-23-5	1.33163e+06	1.11211e+06	1.52159e+06	3.91257e+06	2.85877e+06	6.64191e+06	1.20377	0.106221	0.21606	3.38263	1.75815	up
KMW0233	GC-MS	C8H8O	Acetophenone	苯乙酮	Ketone	酮	-	-	98-86-2	1.3226e+07	2.47365e+07	3.06781e+07	1.04333e+08	8.05048e+07	1.26527e+08	1.24348	0.0160342	0.0988682	4.53616	2.18147	up
KMW0212	GC-MS	C8H8O	BenzeneacetAldehyde	苯乙醛	Aldehyde	醛	-	-	122-78-1	7.17424e+06	8.04229e+06	9.25534e+06	5.2371e+07	3.73535e+07	6.2764e+07	1.29983	0.0279172	0.111998	6.23118	2.6395	up
NMW0023	GC-MS	C8H8O	BenzAldehyde, 2-methyl-	2-甲基-苯甲醛	Aldehyde	醛	-	-	529-20-4	3.03564e+07	5.48789e+07	6.73254e+07	2.1439e+08	1.66893e+08	2.57047e+08	1.24296	0.0142611	0.0986287	4.1841	2.06492	up
NMW0777	GC-MS	C4H8S2	DiSulfur compounds, methyl 2-propenyl	二硫化二甲基2-丙烯基	Sulfur compounds	含硫化合物	-	-	2179-58-0	2710.56	3221.97	11204.4	18519.5	24424.9	16301.4	1.11294	0.0191841	0.100137	3.4572	1.7896	up
XMW0770	GC-MS	C9H10	Indane	茚满	Aromatics	芳烃	-	-	496-11-7	21494.8	16410.9	11367	68670.4	24969.9	34314.2	1.04006	0.182345	0.301707	2.59686	1.37677	up
NMW0011	GC-MS	C8H6O	Benzofuran	苯并呋喃	Heterocyclic compound	杂环化合物	-	-	271-89-6	15128.1	32217.4	12755.5	262221	162729	239249	1.28173	0.01828	0.0992405	11.0514	3.46615	up
KMW0167	GC-MS	C5H8OS	3(2H)-Thiophenone, dihydro-2-methyl-	甲基二氢噻吩酮	Heterocyclic compound	杂环化合物	-	-	13679-85-1	1441.81	4201.04	4449.26	26110.2	17114.4	22861.6	1.23428	0.0115298	0.0986287	6.5483	2.71112	up
XMW0291	GC-MS	C5H9NO2	N-Acetylisoxazolidine	N-乙酰乙二唑烷	Heterocyclic compound	杂环化合物	-	-	115615-36-6	3621.6	1834.79	3709.09	309538	92251.8	144380	1.29307	0.111838	0.22144	59.59	5.897	up
KMW0152	GC-MS	C5H9NS	Butane, 1-isothiocyanato-	异硫氰酸丁酯	Ester	酯	-	-	592-82-5	707.219	9	1068.88	71662.8	232520	62664.2	1.17695	0.158216	0.275333	205.505	7.68303	up
WMW0103	GC-MS	C7H14O	2-Cyclopentylethanol	2-环戊基乙醇	Alcohol	醇	-	-	766-00-7	1.73286e+06	3.59683e+06	1.47297e+06	2.54983e+07	1.65213e+07	2.32673e+07	1.28092	0.0143896	0.0986287	9.59726	3.26262	up
w43	GC-MS	C6H10O2	2-Oxepanone	2-氧戊酮	Ketone	酮	-	-	502-44-3	281981	488604	589397	2.01157e+06	1.50169e+06	2.5062e+06	1.24857	0.0247451	0.111998	4.42614	2.14605	up
XMW1203	GC-MS	C5H6O3	2,5-Furandione, dihydro-3-methyl-	二氢-3-甲基-2,5-呋喃二酮	Ketone	酮	-	-	4100-80-5	278103	488604	589276	2.00639e+06	1.4899e+06	2.48613e+06	1.24653	0.02442	0.111998	4.41187	2.14139	up
XMW0488	GC-MS	C6H11NO	2-Acetylpyrrolidine	2-乙酰基吡咯烷	Heterocyclic compound	杂环化合物	-	-	60026-20-2	48563.9	31591.7	31910.9	416392	329865	332436	1.30831	0.00609166	0.092265	9.62547	3.26686	up
XMW0765	GC-MS	C7H12O	4-Heptenal	顺-4-庚烯醛	Aldehyde	醛	-	-	62238-34-0	2473.71	3433.9	1301.25	20666.7	18894.5	17663.4	1.27801	0.000194317	0.0354741	7.93808	2.98879	up
KMW0123	GC-MS	C7H12O	4-Heptenal, (Z)-	4庚醛	Aldehyde	醛	-	-	6728-31-0	877.464	757.975	9	14043.6	13185.1	9806.25	1.07546	0.0094082	0.0967806	22.5213	4.49322	up
D373	GC-MS	C7H12O	2,4-Heptadien-1-ol, (E,E)-	（E，E）-2,4-庚二烯-1-醇	Alcohol	醇	-	-	33467-79-7	2.87273e+06	5.98737e+06	2.4153e+06	4.48013e+07	2.89401e+07	4.07564e+07	1.28194	0.0146971	0.0986287	10.1547	3.34407	up
GMW0039	GC-MS	C5H4O3	2-Furancarboxylic acid	2-呋喃甲酸	Heterocyclic compound	杂环化合物	-	-	88-14-2	49429.9	36731.3	29800.7	10606.4	13359.3	11301.9	1.27577	0.040321	0.1262	0.304131	-1.71724	down
KMW0136	GC-MS	C6H9NO	2-Acetyl-1-pyrroline	乙酰吡咯啉	Heterocyclic compound	杂环化合物	-	-	85213-22-5	8631.36	9638.52	26385	92537.9	99478.7	81628	1.24013	0.000629135	0.056056	6.12799	2.61541	up
NMW0036	GC-MS	C6H9NO	1-ethenyl-2-Pyrrolidinone	1-乙烯基-2-吡咯烷酮	Heterocyclic compound	杂环化合物	-	-	88-12-0	31777.7	29363.8	21752.3	9279.14	10190.9	6291.82	1.25936	0.0146001	0.0986287	0.310781	-1.68603	down
XMW1467	GC-MS	C6H10N2	1H-Pyrazole, 1,3,5-trimethyl-	1,3,5-三甲基-1H-吡唑	Heterocyclic compound	杂环化合物	-	-	1072-91-9	17253.5	17766.5	27627.7	9.94244e+06	1.50697e+07	7.95196e+06	1.31839	0.0353998	0.119929	526.182	9.03942	up
XMW0884	GC-MS	C7H10O	5-Hexenal, 4-methylene-	4-亚甲基-5-己烯	Hydrocarbons	烃类	-	-	17844-21-2	14720.6	23153.2	28438.1	299084	406715	321425	1.30735	0.00950816	0.0967806	15.4908	3.95334	up
XMW0910	GC-MS	C5H6N2O	1H-Imidazole, 1-acetyl-	1-乙酰基-1H-咪唑	Heterocyclic compound	杂环化合物	-	-	2466-76-4	44182.4	63769.1	190210	6.45242e+06	3.10346e+06	3.32625e+06	1.28216	0.0602171	0.153515	43.2052	5.43313	up
XMW0714	GC-MS	C6H7NO	3-Acetyl-1H-pyrroline	3-乙酰基-1H-吡咯啉	Heterocyclic compound	杂环化合物	-	-	1072-82-8	27598.9	13136.2	15580	162401	152837	115922	1.28456	0.00784671	0.092265	7.65621	2.93663	up
KMW0240	GC-MS	C6H7NO	Ethanone, 1-(1H-pyrrol-2-yl)-	2-乙酰基吡咯	Heterocyclic compound	杂环化合物	-	-	1072-83-9	7.64183e+06	1.42679e+07	1.77886e+07	6.09278e+07	4.71557e+07	7.3736e+07	1.24447	0.0154428	0.0986287	4.58004	2.19536	up
NMW0021	GC-MS	C6H8N2	2-PyridinemethanAmine	2-吡啶甲胺	Amine	胺	-	-	3731-51-9	2.16771e+06	2.42612e+06	2.80575e+06	1.59163e+07	1.13612e+07	1.92674e+07	1.29937	0.028797	0.111998	6.29021	2.65311	up
KMW0382	GC-MS	C7H8O	Phenol, 2-methyl-	邻甲酚	Aromatics	芳烃	-	-	95-48-7	145006	167767	198409	1.03152e+06	721828	1.20689e+06	1.29586	0.0276699	0.111998	5.79097	2.5338	up
KMW0323	GC-MS	C7H8O	Benzyl Alcohol	苯甲醇	Alcohol	醇	-	-	100-51-6	5.61787e+06	2.4732e+06	2.53458e+06	6.34341e+07	4.93209e+07	5.09892e+07	1.29498	0.00543775	0.0909479	15.4103	3.94582	up
KMW0271	GC-MS	C7H8O	Phenol, 3-methyl-	间甲酚	Aromatics	芳烃	-	-	108-39-4	39575.9	32334.7	44320.4	111680	77026.6	188795	1.18358	0.1172	0.22764	3.24786	1.69949	up
KMW0261	GC-MS	C7H8O	p-Cresol	对甲酚	Aromatics	芳烃	-	-	106-44-5	218055	167164	218949	604803	422610	1.03264e+06	1.19397	0.114008	0.223746	3.40973	1.76966	up
XMW0651	GC-MS	C7H9N	Pyridine, 2,3-dimethyl-	2,3-二甲基吡啶	Heterocyclic compound	杂环化合物	-	-	583-61-9	104333	147694	455778	1.68161e+07	7.39859e+06	8.05446e+06	1.28008	0.0739355	0.172849	45.5905	5.51066	up
NMW0013	GC-MS	C7H9N	Benzylamine	苄胺	Aromatics	芳烃	-	-	100-46-9	12056.1	9291.37	10862.6	87968.9	97599.1	110391	1.31595	0.00488156	0.0893922	9.1884	3.19981	up
XMW0114	GC-MS	C6H5NO	Benzene, nitroso-	亚硝基苯	Aromatics	芳烃	-	-	586-96-9	2.60494e+06	5.39888e+06	2.16866e+06	3.98481e+07	2.58248e+07	3.62122e+07	1.28155	0.0143645	0.0986287	10.0158	3.3242	up
KMW0070	GC-MS	C8H10	Benzene, 1,3-dimethyl-	间二甲苯	Aromatics	芳烃	-	-	108-38-3	5373.35	5816.74	13258.9	20470.2	25972	37886.9	1.16985	0.0415858	0.128073	3.44919	1.78626	up
KMW0158	GC-MS	C7H6O	BenzAldehyde	苯甲醛	Aldehyde	醛	-	-	100-52-7	26010.1	11537.1	20643.6	2.1192e+06	6.64491e+06	1.85598e+06	1.29924	0.151754	0.269571	182.505	7.51179	up
NMW0028	GC-MS	C6H4N2	2-Pyridinecarbonitrile	2-吡啶甲腈	Heterocyclic compound	杂环化合物	-	-	100-70-9	38863.7	31041.8	40910.7	94035	63545.5	153667	1.15498	0.125793	0.23721	2.80868	1.48989	up
KMW0426	GC-MS	C7H5N	Benzonitrile	氰化苯	Aromatics	芳烃	-	-	100-47-0	46116.9	7276.2	25283.1	2.40145e+06	878149	1.33322e+06	1.26709	0.0787304	0.181263	58.6304	5.87358	up
XMW0892	GC-MS	C3H6N2O2	Propanediamide	丙二酰胺	Amine	胺	-	-	108-13-4	6937.66	6428.98	7271.3	27412.3	20671.4	32681.9	1.29456	0.0282718	0.111998	3.91345	1.96844	up
XMW1116	GC-MS	C6H12O	4-Hexen-1-ol, (E)-	（E）-4-己烯-1-醇	Alcohol	醇	-	-	928-92-7	5287.85	5223.41	20666.6	44097.4	58176.4	33499.6	1.14449	0.0200794	0.101539	4.3548	2.12261	up
NMW0790	GC-MS	C5H8O2	2H-Pyran-2-one, tetrahydro-	四氢-2H-吡喃-2-酮	Ketone	酮	-	-	542-28-9	2038.65	1339.95	745.366	67478.5	211736	58200.1	1.28745	0.154938	0.271217	81.818	6.35435	up
XMW0710	GC-MS	CH4N6	1H-Tetrazole-1,5-diAmine	1H-四唑-1,5-二胺	Amine	胺	-	-	2165-21-1	1.49687e+07	1.63635e+07	2.11833e+07	5.58002e+07	3.11248e+07	4.32192e+07	1.20836	0.0597931	0.152871	2.47821	1.3093	up
XMW1115	GC-MS	C6H10O	Isopropenyl ethyl ketone	异丙烯基乙基酮	Ketone	酮	-	-	25044-01-3	8371.92	8219.43	16569.9	29820.4	43228.2	33355.9	1.2176	0.0101189	0.0967806	3.2087	1.68199	up
XMW0123	GC-MS	C4H3NO2	1H-Pyrrole-2,5-dione	1H-吡咯-2,5-二酮	Amine	胺	-	-	541-59-3	16048.4	16457.8	22852.4	85878.6	90871.7	62267	1.29073	0.0156422	0.0986287	4.31761	2.11023	up
NMW0059	GC-MS	C5H6N2	4-Aminopyridine	4-氨基吡啶	Heterocyclic compound	杂环化合物	-	-	504-24-5	82867.1	65492.3	59642.6	1.4475e+06	1.78496e+06	1.0806e+06	1.3132	0.0212823	0.103904	20.7357	4.37404	up
KMW0060	GC-MS	C7H8	Toluene	甲苯	Aromatics	芳烃	-	-	108-88-3	31826.8	32498.5	47075.5	168337	157245	209383	1.29747	0.00770674	0.092265	4.80217	2.26369	up
XMW0076	GC-MS	C5H4N2	1H-Pyrrole-3-carbonitrile	1H-吡咯-3-腈	Heterocyclic compound	杂环化合物	-	-	7126-38-7	4.88563e+06	2.07622e+06	2.26602e+06	5.97537e+07	4.66666e+07	4.74636e+07	1.29589	0.00579953	0.092265	16.676	4.0597	up
KMW0048	GC-MS	C5H12O	1-Butanol, 3-methyl-	3-甲基-1-丁醇	Alcohol	醇	-	-	123-51-3	52645.4	45248.3	99018.7	173902	243982	192018	1.20901	0.00782007	0.092265	3.09732	1.63102	up
KMW0051	GC-MS	C5H12O	1-Butanol, 2-methyl-	2-甲基-1-丁醇	Alcohol	醇	-	-	137-32-6	3745.23	2796.94	3805.51	7166.08	12671.7	12145.1	1.23474	0.0501035	0.140195	3.09083	1.62799	up
XMW1224	GC-MS	C2H4N2O2	Ethanediamide	乙二酰胺	Amine	胺	-	-	471-46-5	5299.51	4560.71	3023.35	51285.4	36506	39931.5	1.30343	0.0119212	0.0986287	9.91362	3.30941	up
XMW0908	GC-MS	C2H4N2O2	1,2-HydrazinedicarboxAldehyde	1,2-肼二甲醛	Aldehyde	醛	-	-	628-36-4	581.792	472.32	1167.29	81528.7	41214.2	45863.2	1.30571	0.0488475	0.13883	75.9009	6.24604	up
NMW0771	GC-MS	C4H9NO	N,N-Dimethylacetamide	N，N-二甲基乙酰胺	Amine	胺	-	-	127-19-5	2471.77	3065.47	6799.58	126780	64110.4	70861.2	1.28603	0.051991	0.142316	21.2171	4.40715	up
XMW0573	GC-MS	C4H8N2	1,5-Diazabicyclo[3.1.0]hexane	1,5-二氮杂双环[3.1.0]己烷	Heterocyclic compound	杂环化合物	-	-	13090-31-8	2080.77	1865.98	9705.04	52766.5	97571.3	55611.4	1.23512	0.043694	0.13242	15.0859	3.91513	up
XMW0650	GC-MS	C5H8O	2-Butenal, 3-methyl-	3-甲基-2-丁醛	Aldehyde	醛	-	-	107-86-8	34394	40618.5	54278.8	123075	107093	121357	1.27516	0.000743526	0.0576089	2.71886	1.443	up
KMW0047	GC-MS	C5H8O	2-Butenal, 2-methyl-	甲基-2-丁烯醛	Aldehyde	醛	-	-	1115-11-3	49362.3	49535.8	94403.2	172324	231519	195521	1.2293	0.00430325	0.0864396	3.10067	1.63258	up
NMW0776	GC-MS	C4H4O2	2(5H)-Furanone	2（5H）-呋喃酮	Ketone	酮	-	-	497-23-4	6005.32	8057.5	27746.3	48998.2	47117.7	50676.8	1.11907	0.0346255	0.119505	3.51102	1.81189	up
XMW0132	GC-MS	C5H9N	Pyridine, 2,3,4,5-tetrahydro-	2,3,4,5-四氢吡啶	Heterocyclic compound	杂环化合物	-	-	505-18-0	50393.9	50012.5	87924.8	182288	237911	196567	1.25398	0.00311017	0.0815048	3.2749	1.71145	up
