# Supplementary material for: Metabolomics Analysis Reveals the Differences Between Bupleurum chinense DC. and Bupleurum scorzonerifolium Willd
Source: Front Plant Sci. 2022 Jul 13;13:933849. doi: 10.3389/fpls.2022.933849 (PMC9328751; doi:10.3389/fpls.2022.933849)
Supplement: Supplementary file 5 [file Table_5.XLSX]

## Sheet: Sheet1
Index	Platform	Formula	Compounds	物质	Class I	物质一级分类	Class II	物质二级分类	CAS	BcF1	BcF2	BcF3	BsF1	BsF2	BsF3	VIP	p_value	FDR	Fold_Change	Log2FC	Type
Lmbn000193	UPLC-MS/MS	C3H4O4	Tartronate semialdehyde	羟基丙二酸半醛	Organic acids	有机酸	Organic acids	有机酸	2480-77-5	873880	813340	1878700	610170	388220	545130	1.12205	0.18663	0.353028	0.432853	-1.20805	down
ML10172161	UPLC-MS/MS	C3H4O4	Hydroxypyruvic acid	羟基丙酮酸	Organic acids	有机酸	Organic acids	有机酸	1113-60-6	1215900	1182400	2675000	781720	567080	753930	1.15854	0.179725	0.347002	0.41447	-1.27066	down
mws0576	UPLC-MS/MS	C4H8O3	3-Hydroxybutyric acid	3-羟基丁酸	Organic acids	有机酸	Organic acids	有机酸	300-85-6	6008400	5113200	13718000	3907300	2868300	3700600	1.09155	0.22047	0.392142	0.421754	-1.24553	down
MWS2076	UPLC-MS/MS	C6H7NO	2-Aminophenol	2-氨基苯酚	Alkaloids	生物碱	Alkaloids	生物碱	95-55-6	59052	84752	41849	25290	16316	22578	1.27436	0.0772031	0.228788	0.34572	-1.53232	down
MWS5173	UPLC-MS/MS	C4H5N3O	Isocytosine	异胞嘧啶	Nucleotides and derivatives	核苷酸及其衍生物	Nucleotides and derivatives	核苷酸及其衍生物	108-53-2	22746	53585	79479	179180	136690	228150	1.21238	0.0204033	0.124232	3.49156	1.80387	up
pme0006	UPLC-MS/MS	C5H9NO2	L-Proline	L-脯氨酸	Amino acids and derivatives	氨基酸及其衍生物	Amino acids and derivatives	氨基酸及其衍生物	147-85-3	1582800	3125800	1266400	3287800	5589000	3122600	1.05055	0.117159	0.281309	2.00827	1.00595	up
mws0491	UPLC-MS/MS	C8H11N	Phenethylamine	2-苯乙胺	Alkaloids	生物碱	Alkaloids	生物碱	64-04-0	478330	402540	248520	101630	174750	116030	1.26344	0.0562574	0.193157	0.347453	-1.52511	down
mws0628	UPLC-MS/MS	C7H6O2	4-Hydroxybenzaldehyde	对羟基苯甲醛	Phenolic acids	酚酸类	Phenolic acids	酚酸类	123-08-0	297520	195720	447080	121390	116700	105500	1.26199	0.111814	0.275141	0.365397	-1.45246	down
pme2693	UPLC-MS/MS	C6H14N2O	N-Acetylputrescine	N-乙酰腐胺	Alkaloids	生物碱	Phenolamine	酚胺	18233-70-0	245830	194180	281150	81071	64672	94391	1.35501	0.0159221	0.11392	0.332983	-1.58648	down
pme3034	UPLC-MS/MS	C5H8O4	Ethylmalonic acid	乙基丙二酸	Organic acids	有机酸	Organic acids	有机酸	601-75-2	27727	27292	20350	114850	180060	133720	1.386	0.024571	0.132431	5.68709	2.50769	up
pme0243	UPLC-MS/MS	C5H8O4	Glutaric acid	戊二酸	Organic acids	有机酸	Organic acids	有机酸	110-94-1	543280	513800	531140	2804300	5247900	3835100	1.38778	0.0400088	0.162587	7.48467	2.90394	up
MWS1709	UPLC-MS/MS	C4H6O5	D-Malic acid	D-苹果酸	Organic acids	有机酸	Organic acids	有机酸	636-61-3	9540900	14474000	13233000	25484000	24557000	25496000	1.3267	0.0106292	0.0924999	2.02795	1.02002	up
MWSmce701	UPLC-MS/MS	C9H10O	4-Ethylbenzaldehyde	4-乙基苯甲醛	Others	其它类	Others	其它	4748-78-1	140000	174870	326230	83089	85093	75405	1.23413	0.145954	0.308876	0.379952	-1.39611	down
pme0040	UPLC-MS/MS	C5H5N5	Adenine	腺嘌呤	Nucleotides and derivatives	核苷酸及其衍生物	Nucleotides and derivatives	核苷酸及其衍生物	73-24-5	974920	435040	1717000	174570	171630	325660	1.19062	0.156242	0.321729	0.21486	-2.21853	down
mws0889	UPLC-MS/MS	C4H8O5	D-Threonic Acid	D-苏糖酸	Others	其它类	Saccharides and Alcohols	糖及醇类	3909-12-4	812390	947070	900940	2307700	2002400	1866000	1.38195	0.00779823	0.0813569	2.32149	1.21505	up
pme1173	UPLC-MS/MS	C5H4N4O	Allopurinol	别嘌呤醇	Nucleotides and derivatives	核苷酸及其衍生物	Nucleotides and derivatives	核苷酸及其衍生物	315-30-0	61649	35879	81320	43841	14676	23600	1.02153	0.120836	0.285514	0.459144	-1.12298	down
mws0749	UPLC-MS/MS	C7H6O3	4-Hydroxybenzoic acid	4-羟基苯甲酸	Phenolic acids	酚酸类	Phenolic acids	酚酸类	99-96-7	7378000	7347300	3380300	723320	808130	470620	1.35693	0.0552838	0.191795	0.110577	-3.17687	down
Lmbn001981	UPLC-MS/MS	C7H6O3	2,5-Dihydroxybenzaldehyde	2,5-二羟基苯甲醛	Phenolic acids	酚酸类	Phenolic acids	酚酸类	1194-98-5	8211000	8252500	3671500	887620	1073000	654330	1.34793	0.0606927	0.200511	0.129871	-2.94485	down
Hmgn001653	UPLC-MS/MS	C7H6O3	Protocatechualdehyde	原儿茶醛	Phenolic acids	酚酸类	Phenolic acids	酚酸类	139-85-5	7821800	8448600	3809400	973360	1026000	617170	1.35137	0.0559996	0.193157	0.130307	-2.94002	down
mws0336	UPLC-MS/MS	C6H6N2O2	Urocanic acid	尿刊酸	Organic acids	有机酸	Organic acids	有机酸	104-98-3	141810	85172	87211	5244.9	7341.2	42680	1.18098	0.0233084	0.129341	0.175899	-2.50718	down
Hmbn004041	UPLC-MS/MS	C9H14O	2-Pentylfuran	2-戊基呋喃	Others	其它类	Others	其它	3777-69-3	103860	42490	119970	9	9	9	1.40618	0.0640004	0.205724	0.000101382	-13.2679	down
Hmsp000364	UPLC-MS/MS	C7H13NO2	L-Cyclopentylglycine	环戊基甘氨酸	Amino acids and derivatives	氨基酸及其衍生物	Amino acids and derivatives	氨基酸及其衍生物	2521-84-8	4633100	4479100	4013200	10176000	6792600	10820000	1.30647	0.0566273	0.193902	2.11716	1.08213	up
Zmyn000247	UPLC-MS/MS	C5H8O5	2-Hydroxyglutaric Acid	2-羟基戊二酸	Organic acids	有机酸	Organic acids	有机酸	13095-48-2	584940	581300	588930	1107500	1320000	1154400	1.39384	0.0109499	0.09437	2.04077	1.02911	up
Lmbn000216	UPLC-MS/MS	C5H8O5	3-Methylmalic acid	3-甲基苹果酸	Organic acids	有机酸	Organic acids	有机酸	152204-30-3	570820	660250	590330	1192000	1207400	1382800	1.39118	0.00322027	0.0598059	2.07653	1.05418	up
pmb2826	UPLC-MS/MS	C5H8O5	L-Citramalic acid	2-甲基苹果酸	Organic acids	有机酸	Organic acids	有机酸	6236-09-5	1180300	1106000	1057900	1903800	2736500	2525500	1.35353	0.0341734	0.153953	2.14275	1.09947	up
Zmyn000230	UPLC-MS/MS	C5H8O5	2-Dehydro-3-deoxy-L-arabinonate	2-脱氢-3-脱氧-L-阿拉伯糖	Others	其它类	Saccharides and Alcohols	糖及醇类	-	511050	481050	512020	995790	1097700	943050	1.39391	0.00579823	0.0713382	2.01881	1.01351	up
Lmgp000796	UPLC-MS/MS	C8H7NO2	4-Hydroxymandelonitrile	4-羟基扁桃腈	Alkaloids	生物碱	Phenolamine	酚胺	13093-65-7	1463600	1307000	6072200	15684000	8343500	11889000	1.17745	0.0303502	0.146459	4.06167	2.02207	up
pme1210	UPLC-MS/MS	C5H11NO2S	L-Methionine	L-甲硫氨酸	Amino acids and derivatives	氨基酸及其衍生物	Amino acids and derivatives	氨基酸及其衍生物	63-68-3	1594000	1135600	5609200	13199000	7067900	9362900	1.1484	0.038484	0.161683	3.55325	1.82914	up
mws0847	UPLC-MS/MS	C6H7N5	1-Methyladenine	1-甲基腺嘌呤	Nucleotides and derivatives	核苷酸及其衍生物	Nucleotides and derivatives	核苷酸及其衍生物	5142-22-3	21012	28979	95074	287110	108000	142320	1.11548	0.125766	0.290923	3.70475	1.88938	up
Lmxn006423	UPLC-MS/MS	C7H5NOS	2(3H)-Benzothiazolone	2-羟基苯并噻唑	Alkaloids	生物碱	Alkaloids	生物碱	934-34-9	2560	5415.4	5111.6	12396	11754	24402	1.25786	0.0964614	0.255143	3.70994	1.8914	up
mws0183	UPLC-MS/MS	C7H6O4	3,4-Dihydroxybenzoic acid (Protocatechuic acid)	3,4-二羟基苯甲酸; 原儿茶酸	Phenolic acids	酚酸类	Phenolic acids	酚酸类	99-50-3	6223600	7481300	2543500	891380	798380	783480	1.31661	0.0901552	0.247061	0.152214	-2.71582	down
mws0180	UPLC-MS/MS	C7H6O4	2,5-Dihydroxybenzoic acid; Gentisic Acid	2,5-二羟基苯甲酸; 龙胆酸	Phenolic acids	酚酸类	Phenolic acids	酚酸类	490-79-9	2678100	3475200	1113500	328400	342200	328560	1.31991	0.0948121	0.25359	0.137497	-2.86253	down
mws0639	UPLC-MS/MS	C7H6O4	2,3-Dihydroxybenzoic Acid	2,3-二羟基苯甲酸	Organic acids	有机酸	Organic acids	有机酸	303-38-8	5599600	7034900	2052800	741820	661030	695130	1.29735	0.105171	0.267272	0.142843	-2.8075	down
pme2589	UPLC-MS/MS	C6H8O5	2-Oxoadipic acid	2-氧代己二酸	Organic acids	有机酸	Organic acids	有机酸	3184-35-8	9	42543	9	279130	774710	294760	1.14377	0.114747	0.278894	31.6863	4.98579	up
mws1417	UPLC-MS/MS	C9H7NO2	Indole-3-carboxylic acid	吲哚-3-甲酸	Alkaloids	生物碱	Plumerane	吲哚类生物碱	771-50-6	132370	64294	247270	10390000	1387000	7160800	1.30539	0.144004	0.307301	42.659	5.41478	up
mws0102	UPLC-MS/MS	C9H7NO2	Indole-5-carboxylic acid	吲哚-5-甲酸	Alkaloids	生物碱	Plumerane	吲哚类生物碱	1670-81-1	36874	23675	88454	4706200	596530	3345600	1.3155	0.143742	0.30711	58.0413	5.85901	up
mws1346	UPLC-MS/MS	C6H11NO4	DL-2-Aminoadipic acid	DL-2-氨基己二酸	Alkaloids	生物碱	Alkaloids	生物碱	542-32-5	339770	481960	693040	898990	1227400	1394200	1.23045	0.024025	0.131072	2.32417	1.21672	up
pme2914	UPLC-MS/MS	C6H10O5	3-Hydroxy-3-methylpentane-1,5-dioic acid	3-羟基-3-甲基谷氨酸	Amino acids and derivatives	氨基酸及其衍生物	Amino acids and derivatives	氨基酸及其衍生物	503-49-1	719660	692450	291940	40184000	1511300	13820000	1.15599	0.256458	0.424023	32.5784	5.02585	up
Lmrn003000	UPLC-MS/MS	C9H10O3	2-Hydroxy-3-phenylpropanoic acid	2-羟基-3-苯基丙酸	Phenolic acids	酚酸类	Phenolic acids	酚酸类	7326-19-4	178700	141940	87930	1109800	2201700	1886500	1.37772	0.0381332	0.161481	12.7224	3.6693	up
Lmbn005172	UPLC-MS/MS	C9H10O3	2,6-Dimethoxybenzaldehyde	2,6-二甲氧基苯甲醛	Phenolic acids	酚酸类	Phenolic acids	酚酸类	3392-97-0	96407	65012	42724	399010	815570	1147000	1.34977	0.0791003	0.232452	11.5683	3.5321	up
MWS0274	UPLC-MS/MS	C9H10O3	DL-3-Phenyllactic acid	DL-3-苯基乳酸	Organic acids	有机酸	Organic acids	有机酸	828-01-3	57588	43105	25378	232700	404190	695840	1.34281	0.0961437	0.255143	10.5713	3.40208	up
mws0467	UPLC-MS/MS	C9H10O3	3-(4-Hydroxyphenyl)-propionic acid	3-(4-羟基苯基)丙酸	Phenolic acids	酚酸类	Phenolic acids	酚酸类	501-97-3	144340	76746	78415	620430	1198200	1561800	1.36208	0.0635075	0.205432	11.2869	3.49657	up
pma2400	UPLC-MS/MS	C11H18O	Dihydrojasmone	二氢茉莉酮	Organic acids	有机酸	Organic acids	有机酸	1128-08-1	10794	9	15060	803990	538000	520970	1.11431	0.021453	0.126143	72.0319	6.17056	up
pme2598	UPLC-MS/MS	C8H8O4	3,4-Dihydroxybenzeneacetic acid	3,4-二羟基苯乙酸	Phenolic acids	酚酸类	Phenolic acids	酚酸类	102-32-9	175390	21193	156030	9	9	9	1.39399	0.1363	0.300487	7.65712e-05	-13.6728	down
mws0028	UPLC-MS/MS	C8H8O4	Vanillic acid	香草酸	Phenolic acids	酚酸类	Phenolic acids	酚酸类	121-34-6	2886200	1873500	2198500	616340	546260	400930	1.37379	0.0224895	0.126565	0.224703	-2.15391	down
pme1383	UPLC-MS/MS	C8H11NO3	Pyridoxine	吡哆醇	Others	其它类	Vitamin	维生素	65-23-6	230750	165280	289840	1419700	691420	358770	1.11465	0.1967	0.364017	3.60111	1.84844	up
MWSslk138	UPLC-MS/MS	C7H6O5	2,3,4-Trihydroxybenzoic acid	2,3,4-三羟基苯甲酸	Phenolic acids	酚酸类	Phenolic acids	酚酸类	610-02-6	2310500	3916700	541990	74474	45755	67533	1.31973	0.153229	0.318601	0.0277377	-5.17201	down
MA10039492	UPLC-MS/MS	C6H6O6	Dehydroascorbic acid	脱氢抗坏血酸	Others	其它类	Vitamin	维生素	490-83-5	3289500	1772800	2322000	290630	275620	631640	1.32379	0.0360754	0.156245	0.162221	-2.62397	down
pme2550	UPLC-MS/MS	C6H6O6	Cis-Aconitic acid	顺式乌头酸	Organic acids	有机酸	Organic acids	有机酸	585-84-2	5427500	2838400	3577100	960100	821590	1478000	1.2996	0.0573886	0.196133	0.275242	-1.86123	down
mws0154	UPLC-MS/MS	C7H10O5	Shikimic acid	莽草酸	Organic acids	有机酸	Organic acids	有机酸	138-59-0	14676000	7620300	8078800	2709500	1403800	4019500	1.22764	0.0707717	0.216784	0.267746	-1.90107	down
mws1401	UPLC-MS/MS	C7H14N2O3	L-Theanine	L-茶氨酸	Amino acids and derivatives	氨基酸及其衍生物	Amino acids and derivatives	氨基酸及其衍生物	3081-61-6	5750.1	23263	18479	630960	135930	146320	1.26962	0.219151	0.390966	19.2287	4.26519	up
Zmyn000155	UPLC-MS/MS	C7H14N2O3	N-α-Acetyl-L-ornithine	N-α-乙酰基-L-鸟氨酸	Amino acids and derivatives	氨基酸及其衍生物	Amino acids and derivatives	氨基酸及其衍生物	6205-08-9	32069	56819	85353	100750	90600	230730	1.03188	0.201221	0.37008	2.42239	1.27643	up
MWSmce119	UPLC-MS/MS	C6H14N4O2	L-Arginine	L-精氨酸	Amino acids and derivatives	氨基酸及其衍生物	Amino acids and derivatives	氨基酸及其衍生物	74-79-3	188970	263070	336330	633950	482490	1085500	1.22287	0.114601	0.278894	2.79303	1.48183	up
mws4175	UPLC-MS/MS	C6H8O6	D-Glucurono-6,3-lactone	D-葡萄糖醛酸-6,3-内酯	Others	其它类	Saccharides and Alcohols	糖及醇类	32449-92-6	124580	95046	92597	197400	213220	258660	1.34874	0.00965126	0.0911279	2.1436	1.10003	up
Lmbn001754	UPLC-MS/MS	C7H12O5	3-Isopropylmalic Acid	3-异丙基苹果酸	Organic acids	有机酸	Organic acids	有机酸	921-28-8	2870900	1289100	2807000	9889700	7833100	7527100	1.30036	0.00375616	0.0599359	3.62421	1.85767	up
pmb3101	UPLC-MS/MS	C7H12O5	2-Isopropylmalic Acid	2-异丙基苹果酸	Organic acids	有机酸	Organic acids	有机酸	49601-06-1	2231100	1172100	2744800	8792700	6408700	6128500	1.288	0.0123717	0.102557	3.4694	1.79469	up
Zmgn001448	UPLC-MS/MS	C7H12O5	2-Propylmalic Acid	2-丙基苹果酸	Organic acids	有机酸	Organic acids	有机酸	-	2846200	1171500	3069700	10159000	6795300	7216900	1.24928	0.0163346	0.114056	3.41045	1.76996	up
mws2212	UPLC-MS/MS	C9H8O4	Caffeic acid	咖啡酸	Phenolic acids	酚酸类	Phenolic acids	酚酸类	331-39-5	2019500	3084400	813450	640750	850310	606860	1.04643	0.190338	0.355564	0.354537	-1.49599	down
mws0093	UPLC-MS/MS	C10H12O3	Coniferyl alcohol	松柏醇	Phenolic acids	酚酸类	Phenolic acids	酚酸类	458-35-5	16984	24164	25920	3997	3739.8	5330.5	1.37845	0.0195853	0.123665	0.194837	-2.35966	down
Hmcn006267	UPLC-MS/MS	C9H10O4	2,6-Dimethoxybenzoic acid	2,6-二甲氧基苯甲酸	Phenolic acids	酚酸类	Phenolic acids	酚酸类	1466-76-8	1458300	1506500	1122900	554500	552190	665130	1.35529	0.0166731	0.11439	0.433452	-1.20606	down
MWSmce455	UPLC-MS/MS	C9H10O4	Vanillic acid methyl ester	香草酸甲酯	Phenolic acids	酚酸类	Phenolic acids	酚酸类	3943-74-6	1456100	1480000	1118600	516760	537540	616610	1.36536	0.0159641	0.11392	0.412092	-1.27896	down
Hmtn001288	UPLC-MS/MS	C9H10O4	Methyl 2,4-dihydroxyphenylacetate	2,4-二羟基苯乙酸甲酯	Phenolic acids	酚酸类	Phenolic acids	酚酸类	67828-42-6	11195	14141	10828	55390	71129	82863	1.39437	0.0171186	0.114651	5.78979	2.53351	up
Lmrn001951	UPLC-MS/MS	C9H10O4	(S)-2-Hydroxy-3-(4-Hydroxyphenyl)Propanoic Acid	2-羟基-(4-羟基苯基)丙酸	Phenolic acids	酚酸类	Phenolic acids	酚酸类	23508-35-2	4627.2	9	9	69589	77338	83238	1.21591	0.000889704	0.0457805	49.549	5.63078	up
Lmcn002039	UPLC-MS/MS	C9H12O4	Antiarol; 3,4,5-Trimethoxyphenol	3,4,5-三甲氧基苯酚	Phenolic acids	酚酸类	Phenolic acids	酚酸类	642-71-7	29510	19011	312860	8193200	6304700	6212200	1.3202	0.00785757	0.0814009	57.3082	5.84067	up
mws0237	UPLC-MS/MS	C9H16O4	Azelaic acid	壬二酸	Organic acids	有机酸	Organic acids	有机酸	123-99-9	342740	255640	664710	1044800	648010	857650	1.08254	0.0645998	0.206443	2.01922	1.0138	up
Zmzp000145	UPLC-MS/MS	C9H20N2O2	Trimethyllysine	三甲基赖氨酸	Amino acids and derivatives	氨基酸及其衍生物	Amino acids and derivatives	氨基酸及其衍生物	23284-33-5	1278300	1383500	685800	132010	139680	208450	1.35239	0.0463726	0.175752	0.143428	-2.8016	down
pmp001232	UPLC-MS/MS	C12H14O2	Neoligustilide	新藁本内脂	Others	其它类	Others	其它	-	62352	29226	54057	9	9	9	1.40741	0.0395637	0.162411	0.000185395	-12.3971	down
MWSmce658	UPLC-MS/MS	C10H8O4	Noreugenin; 5,7-Dihydroxy-2-Methylchromone	去甲丁香色原酮; 5,7-二羟基-2-甲基色酮	Phenolic acids	酚酸类	Phenolic acids	酚酸类	1013-69-0	259670	453290	232250	54273	16268	63874	1.27416	0.0548995	0.191795	0.142206	-2.81394	down
Hmcp002123	UPLC-MS/MS	C10H8O4	Isoscopoletin (6-Hydroxy-7-Methoxycoumarin)	异莨菪亭	Lignans and Coumarins	木脂素和香豆素	Coumarins	香豆素	776-86-3	5032200	2024000	3297300	2402700	1523200	1155900	1.01462	0.170765	0.338119	0.490829	-1.02671	down
mws1189	UPLC-MS/MS	C6H10O7	D-Galacturonic acid	D-半乳糖醛酸	Organic acids	有机酸	Organic acids	有机酸	685-73-4	196990	220100	88404	401000	403980	421270	1.21536	0.0250847	0.134076	2.42584	1.27849	up
pme1261	UPLC-MS/MS	C9H19NO4	D-Panthenol	D-泛酰醇	Others	其它类	Saccharides and Alcohols	糖及醇类	81-13-0	18804	19757	35046	6628.6	9910.3	11679	1.23021	0.0932459	0.251665	0.383359	-1.38323	down
pma6599	UPLC-MS/MS	C11H10O4	6-Hydroxymethylherniarin	6-羟甲基脱肠草素	Lignans and Coumarins	木脂素和香豆素	Coumarins	香豆素	117597-79-2	148320	99940	148330	10706	10586	9	1.02955	0.0130377	0.105245	0.0537104	-4.21866	down
mws4173	UPLC-MS/MS	C11H10O4	5,7-Dimethoxycoumarin (Limettin)(Citropten)	5,7-二甲氧基香豆素 (柠檬内酯)(柠檬油素)	Lignans and Coumarins	木脂素和香豆素	Coumarins	香豆素	487-06-9	10539000	18489000	8640300	1040800	153730	1026300	1.2877	0.0581559	0.197362	0.0589575	-4.08418	down
MA10107783	UPLC-MS/MS	C10H8O5	3-[(1-Carboxyvinyl)oxy]benzoic acid	3-[(1-羧乙烯基)氧基]苯甲酸	Phenolic acids	酚酸类	Phenolic acids	酚酸类	16929-37-6	775300	389720	335130	5644100	8864000	9695700	1.38196	0.0244371	0.132108	16.1343	4.01205	up
pme3443	UPLC-MS/MS	C11H12O4	Sinapinaldehyde	芥子醛	Phenolic acids	酚酸类	Phenolic acids	酚酸类	4206-58-0	77870	61732	128980	141280	276890	171020	1.12597	0.104683	0.266411	2.19371	1.13337	up
Zmyn000108	UPLC-MS/MS	C6H10O8	D-Saccharic acid	D-蔗糖酸	Others	其它类	Saccharides and Alcohols	糖及醇类	87-73-0	12888000	14829000	13579000	25810000	28521000	28698000	1.39491	0.000644352	0.042575	2.01058	1.00761	up
Hmcn000192	UPLC-MS/MS	C7H14O7	Sedoheptulose	景天庚酮糖	Others	其它类	Saccharides and Alcohols	糖及醇类	3019-74-7	5241800	5373000	5402200	8751600	11390000	12012000	1.36103	0.0325625	0.151154	2.00747	1.00538	up
pme1654	UPLC-MS/MS	C12H18O3	Jasmonic acid	茉莉酸	Organic acids	有机酸	Organic acids	有机酸	77026-92-7	1450400	370350	1781900	337270	447400	258970	1.01711	0.181434	0.348041	0.289687	-1.78743	down
mws1512	UPLC-MS/MS	C10H12O5	Propyl gallate	没食子酸丙酯(PG)	Phenolic acids	酚酸类	Phenolic acids	酚酸类	121-79-9	47818	65735	18695	9	9	9	1.40295	0.0846266	0.240788	0.000204162	-12.258	down
Hmln002597	UPLC-MS/MS	C10H9NaO4	Sodium ferulate	阿魏酸钠	Phenolic acids	酚酸类	Phenolic acids	酚酸类	24276-84-4	7137000	3283100	3178500	194870	347900	257230	1.3725	0.0817419	0.234827	0.0588296	-4.08731	down
mws0677	UPLC-MS/MS	C12H14N2O2	N-Acetyl-5-hydroxytryptamine	N-乙酰-5-羟基色胺	Alkaloids	生物碱	Plumerane	吲哚类生物碱	1210-83-9	258480	284040	184910	9	9	9	1.40883	0.014688	0.112461	3.7117e-05	-14.7176	down
mws1639	UPLC-MS/MS	C11H10O5	Isofraxidin	异嗪皮啶	Lignans and Coumarins	木脂素和香豆素	Coumarins	香豆素	486-21-5	2492700	1784200	1283400	1224100	381730	605120	1.11448	0.067199	0.210691	0.397631	-1.3305	down
Lmjp002764	UPLC-MS/MS	C11H10O5	Umckalin (7-hydroxy-5,6-dimethoxycoumarin)	5,6-二甲氧基-7-羟基香豆素	Lignans and Coumarins	木脂素和香豆素	Coumarins	香豆素	43053-62-9	65770	85220	51100	241400	162930	156880	1.30785	0.0357631	0.156245	2.77703	1.47354	up
pmp000284	UPLC-MS/MS	C11H10O5	Fraxidin (8-Hydroxy-6,7-dimethoxycoumarin)	秦皮啶	Lignans and Coumarins	木脂素和香豆素	Coumarins	香豆素	525-21-3	871910	727070	511390	390530	129830	219670	1.19276	0.028212	0.142578	0.350664	-1.51184	down
mws0520	UPLC-MS/MS	C11H13NO4	N-Acetyl-L-tyrosine	N-乙酰-L-酪氨酸	Amino acids and derivatives	氨基酸及其衍生物	Amino acids and derivatives	氨基酸及其衍生物	537-55-3	44264	39424	56691	135160	82095	81335	1.22978	0.08782	0.245559	2.12703	1.08884	up
Lmmp003517	UPLC-MS/MS	C13H20O3	Solatuberenol A	Solatuberenol A	Others	其它类	Others	其它	-	516700	451300	832680	3124600	3207600	1796900	1.32137	0.036869	0.158111	4.51446	2.17455	up
Cmsp002787	UPLC-MS/MS	C11H14O5	3,4'-Dihydroxy-3',5'-dimethoxypropiophenone	3,4'-二羟基-3',5'-二甲氧基苯乙酮	Phenolic acids	酚酸类	Phenolic acids	酚酸类	136196-47-9	29036	13940	34930	590650	281950	422460	1.36641	0.0445111	0.171138	16.6234	4.05514	up
Zmnn007376	UPLC-MS/MS	C14H12O3	Xanthyletin	花椒内酯	Lignans and Coumarins	木脂素和香豆素	Coumarins	香豆素	553-19-5	283010	136220	172460	32284	20965	37982	1.34528	0.0617	0.202712	0.154187	-2.69725	down
pmb0962	UPLC-MS/MS	C10H22N2O4	L-Lysine-Butanoic Acid	L-赖氨酸丁酸酯	Amino acids and derivatives	氨基酸及其衍生物	Amino acids and derivatives	氨基酸及其衍生物	80407-71-2	23287	24276	54077	62501	81578	79543	1.16964	0.0357114	0.156245	2.20014	1.13759	up
Hmlp006964	UPLC-MS/MS	C12H12O5	5,6,7-Trimethoxycoumarin	5,6,7-三甲氧基香豆素	Lignans and Coumarins	木脂素和香豆素	Coumarins	香豆素	55085-47-7	62388	26840	29166	149930	80061	165360	1.23199	0.0550676	0.191795	3.33928	1.73954	up
mws0984	UPLC-MS/MS	C9H11N5O3	L-Sepiapterin	L-墨喋呤	Nucleotides and derivatives	核苷酸及其衍生物	Nucleotides and derivatives	核苷酸及其衍生物	17094-01-8	102560	31857	51775	9	9	9	1.40479	0.0983679	0.258404	0.000145012	-12.7515	down
mws0221	UPLC-MS/MS	C6H12N2O4S2	L-Cystine	L-胱氨酸	Amino acids and derivatives	氨基酸及其衍生物	Amino acids and derivatives	氨基酸及其衍生物	56-89-3	9657.9	11871	7779.8	22749	16909	19304	1.299	0.0115312	0.0984287	2.01176	1.00846	up
pmb2591	UPLC-MS/MS	C13H14N2O3	N-Acetyl-L-Tryptophan	N-乙酰-L-色氨酸	Amino acids and derivatives	氨基酸及其衍生物	Amino acids and derivatives	氨基酸及其衍生物	1218-34-4	222510	34212	406920	799000	2437300	1087100	1.12528	0.131454	0.297482	6.51466	2.70369	up
Lmhp001732	UPLC-MS/MS	C14H18N2O3	L-Prolyl-L-Phenylalanine	L-脯氨酰-L-苯丙氨酸	Amino acids and derivatives	氨基酸及其衍生物	Amino acids and derivatives	氨基酸及其衍生物	13589-02-1	153490	263840	160290	373210	478940	432400	1.28413	0.0078937	0.0814009	2.22387	1.15307	up
pme3250	UPLC-MS/MS	C16H12O5	Biochanin A	鹰嘴豆芽素 A	Flavonoids	黄酮	Isoflavones	异黄酮	491-80-5	9	9	15065	64140	6847.5	23547	1.00696	0.256054	0.423748	6.26762	2.64792	up
mws1068	UPLC-MS/MS	C15H10O6	Kaempferol (3,5,7,4'-Tetrahydroxyflavone)	山奈酚	Flavonoids	黄酮	Flavonols	黄酮醇	520-18-3	14023000	18894000	5296700	12770	31492	15223	1.39345	0.0854553	0.241523	0.00155664	-9.32735	down
MWSslk035	UPLC-MS/MS	C13H18O7	Orcinol glucoside	苔黑酚葡萄糖苷	Phenolic acids	酚酸类	Phenolic acids	酚酸类	21082-33-7	9	9	9	177660	31344	18993	1.38861	0.274387	0.439808	8444.33	13.0438	up
pmb2657	UPLC-MS/MS	C10H18N4O6	Argininosuccinic acid	精氨基琥珀酸	Organic acids	有机酸	Organic acids	有机酸	2387-71-5	400800	205020	106210	788360	506280	538190	1.12427	0.0397535	0.162411	2.57409	1.36406	up
Lmmn002230	UPLC-MS/MS	C15H8O7	Demethylwedelolactone	去甲基蟛蜞菊内酯	Lignans and Coumarins	木脂素和香豆素	Coumarins	香豆素	6468-55-9	51480000	36811000	17595000	1394900	1126500	1179600	1.38077	0.0738783	0.223388	0.0349527	-4.83845	down
Hmtn001302	UPLC-MS/MS	C13H16O8	Glucosyloxybenzoic acid	葡萄糖氧基苯甲酸	Phenolic acids	酚酸类	Phenolic acids	酚酸类	-	65261000	41278000	55686000	29370000	21519000	25862000	1.29096	0.0439772	0.170185	0.473115	-1.07974	down
Lmqn008288	UPLC-MS/MS	C18H36O3	3-Hydroxyoctadecanoic Acid	3-羟基十八烷酸	Lipids	脂质	Free fatty acids	游离脂肪酸	45261-96-9	267330	410560	204680	1187000	503780	780330	1.19039	0.105856	0.267867	2.7999	1.48538	up
pme3514	UPLC-MS/MS	C15H10O7	Morin	桑色素	Flavonoids	黄酮	Flavonols	黄酮醇	480-16-0	48425000	60325000	32647000	3501400	4989000	4642000	1.38501	0.0330522	0.152365	0.0928761	-3.42855	down
Zmpp002571	UPLC-MS/MS	C15H10O7	Robinetin	刺槐亭	Flavonoids	黄酮	Flavonols	黄酮醇	490-31-3	19238000	19797000	5110300	68860	123370	112240	1.37913	0.0932397	0.251665	0.006897	-7.17982	down
mws1326	UPLC-MS/MS	C15H10O7	Herbacetin	草质素	Flavonoids	黄酮	Flavonols	黄酮醇	527-95-7	126030	167720	59894	9457.1	13395	8775.7	1.35458	0.0756161	0.224832	0.089434	-3.48303	down
Hmcn002875	UPLC-MS/MS	C15H10O7	6-Hydroxyluteolin	6-羟基木犀草素	Flavonoids	黄酮	Flavones	黄酮	18003-33-3	413980	532540	292860	18382	30493	30140	1.38513	0.0301899	0.146355	0.0637537	-3.97135	down
pme2954	UPLC-MS/MS	C15H10O7	Quercetin	槲皮素	Flavonoids	黄酮	Flavonols	黄酮醇	117-39-5	5172100	6797600	2164100	137810	388600	292560	1.3343	0.0817381	0.234827	0.0579441	-4.10919	down
mws0463	UPLC-MS/MS	C16H14O6	Hesperetin	橙皮素	Flavonoids	黄酮	Flavanones	二氢黄酮	520-33-2	532960	363380	97336	8201.3	12504	10264	1.33644	0.126999	0.292306	0.0311664	-5.00386	down
Zmhn000892	UPLC-MS/MS	C13H18O8	4-O-Glucosyl-3,4-dihydroxybenzyl alcohol	4-O-葡萄糖基-3,4-二羟基苄醇	Phenolic acids	酚酸类	Phenolic acids	酚酸类	-	62992	26071	18014	154770	222600	387790	1.29659	0.0814359	0.234827	7.14589	2.83711	up
Hmsn002598	UPLC-MS/MS	C13H18O8	Salirepin	柳匍匐次苷	Phenolic acids	酚酸类	Phenolic acids	酚酸类	26652-12-0	766530	456600	593930	300020	222270	272200	1.29459	0.0550992	0.191795	0.437239	-1.19351	down
pmn001610	UPLC-MS/MS	C20H36O2	Eicosadienoic acid	二十碳二烯酸	Lipids	脂质	Free fatty acids	游离脂肪酸	5598-38-9	164900	457460	74280	568420	622510	565850	1.06007	0.0889188	0.245559	2.52179	1.33445	up
pmn001606	UPLC-MS/MS	C20H38O2	Eicosenoic acid	二十碳烯酸	Lipids	脂质	Free fatty acids	游离脂肪酸	26764-41-0	16046	16744	9229	30626	28118	45051	1.25948	0.0426151	0.166722	2.47019	1.30462	up
Jmbn003691	UPLC-MS/MS	C15H20O7	3,4-dihydroxy-allylbenzene-3-O-β-D-glucopyranoside	3,4-二羟基烯丙基-3-O-β-D-葡萄吡喃糖苷	Others	其它类	Others	其它	-	396420	244190	197070	769290	638110	850470	1.30004	0.00538944	0.069171	2.69538	1.43049	up
pmn001689	UPLC-MS/MS	C18H32O4	9-Hydroxy-12-oxo-15(Z)-octadecenoic acid	9-羟基-12-氧代-15(Z)-十八碳烯酸	Lipids	脂质	Free fatty acids	游离脂肪酸	-	23499	18559	33634	83476	53116	98360	1.28861	0.0460103	0.175016	3.10405	1.63415	up
Zmzp006646	UPLC-MS/MS	C16H12O7	Capillarisin	茵陈色原酮	Others	其它类	Others	其它	56365-38-9	18071000	20917000	20982000	1269900	1538200	1512400	1.40662	0.0024976	0.0554158	0.0720444	-3.79497	down
mws0066	UPLC-MS/MS	C16H12O7	Isorhamnetin	异鼠李素	Flavonoids	黄酮	Flavonols	黄酮醇	480-19-3	11229000	15547000	20302000	997880	1147200	1136300	1.39807	0.0306985	0.147477	0.0697009	-3.84268	down
mws2627	UPLC-MS/MS	C16H12O7	Tamarixetin (3,3',5,7-Tetrahydroxy-4'-Methoxyflavone)	柽柳黄素	Flavonoids	黄酮	Flavonols	黄酮醇	603-61-2	4275200	5707300	6107400	345720	399070	398270	1.40411	0.0121687	0.101957	0.0710421	-3.81518	down
pmb2221	UPLC-MS/MS	C18H39NO3	4-Hydroxysphinganine	4-羟基鞘氨醇	Lipids	脂质	Sphingolipids	鞘脂	554-62-1	278190	304610	176020	25789	28408	25216	1.39154	0.0286255	0.143449	0.104653	-3.25631	down
Lmyp010328	UPLC-MS/MS	C20H30O3	2-Oxokovalenic acid	2-Oxokovalenic acid	Terpenoids	萜类	Ditepenoids	二萜	-	187580	224820	141850	9	9	9	1.40881	0.0164523	0.114056	4.87145e-05	-14.3253	down
Lmsp013116	UPLC-MS/MS	C20H32O3	Ent-16α,17-Dihydroxykauran-2-one	对映-16α,17-二羟基-贝壳杉-2-酮	Terpenoids	萜类	Ditepenoids	二萜	-	24543	7956.9	22666	135810	98895	72962	1.28055	0.0354945	0.156245	5.57712	2.47952	up
pme2074	UPLC-MS/MS	C18H29NO4	(-)-Jasmonoyl-L-Isoleucine	(-)-茉莉酰-L-异亮氨酸	Organic acids	有机酸	Organic acids	有机酸	120330-93-0	1262200	417940	712110	91749	235870	42885	1.22178	0.105601	0.267602	0.154877	-2.69081	down
mws0983	UPLC-MS/MS	C20H39NO2	N-Oleoylethanolamine	油酰单乙醇胺	Alkaloids	生物碱	Alkaloids	生物碱	111-58-0	9	9	14917	113980	111160	217250	1.15441	0.0524906	0.189178	29.621	4.88855	up
Jmzp008213	UPLC-MS/MS	C20H22O4	Dehydrodiisoeugenol	去氢二异丁香酚	Lignans and Coumarins	木脂素和香豆素	Lignans	木脂素	2680-81-1	54228	36099	651570	9	9	9	1.38623	0.345887	0.494296	3.63932e-05	-14.746	down
Zmgp004718	UPLC-MS/MS	C20H22O4	1-(4-hydroxy-3-methoxyphenyl)-7-phenyl-3,5-diheptanone	1-(4-羟基-3-甲氧基苯基)-7-苯基-3,5-二庚酮	Others	其它类	Others	其它	-	24276	47836	509540	15625	9	9	1.11643	0.354773	0.501983	0.0268941	-5.21657	down
Smjp002269	UPLC-MS/MS	C18H17NO5	N-[3-(4-Hydroxyphenyl)acryloyl]-L-tyrosine	N-[3-(4-羟基苯基)丙烯酰基]-L-酪氨酸	Amino acids and derivatives	氨基酸及其衍生物	Amino acids and derivatives	氨基酸及其衍生物	77201-66-2	9	9	9	36493	39696	48229	1.40983	0.00705965	0.0787151	4608.07	12.1699	up
pmn001690	UPLC-MS/MS	C16H24O7	3-Hydroxy-4-isopropylbenzylalcohol-3-O-glucoside	3-羟基-4-异丙基苯甲醇-3-O-葡萄糖苷	Phenolic acids	酚酸类	Phenolic acids	酚酸类	-	162300	157450	211030	13543	4559.5	11399	1.37214	0.00899649	0.0881854	0.0555814	-4.16925	down
MWSHY0095	UPLC-MS/MS	C17H14O7	Tricin (5,7,4'-Trihydroxy-3',5'-dimethoxyflavone)	苜蓿素(麦黄酮)	Flavonoids	黄酮	Flavones	黄酮	520-32-1	316650	545190	76125	9	9	9	1.39912	0.14727	0.310189	2.87857e-05	-15.0843	down
Lmtn002565	UPLC-MS/MS	C14H18O9	1-O-Vanilloyl-D-Glucose	1-O-香草酰-D-葡萄糖	Phenolic acids	酚酸类	Phenolic acids	酚酸类	-	137550	87649	79228	24070	17364	39232	1.28524	0.0422749	0.165755	0.264976	-1.91606	down
Lmmn003663	UPLC-MS/MS	C14H18O9	5-Glucosyloxy-2-Hydroxybenzoic acid methyl ester	5-葡萄糖氧基-2-羟基苯甲酸甲酯	Phenolic acids	酚酸类	Phenolic acids	酚酸类	-	111450	89076	74276	9	9	9	1.40877	0.0136333	0.107619	9.82526e-05	-13.3131	down
pme3184	UPLC-MS/MS	C10H14N5O6P	2'-Deoxyadenosine-5'-monophosphate	2'-脱氧腺苷-5'-单磷酸	Nucleotides and derivatives	核苷酸及其衍生物	Nucleotides and derivatives	核苷酸及其衍生物	653-63-4	85986	34310	47648	466900	194320	275980	1.29489	0.0816048	0.234827	5.58043	2.48038	up
pmb0789	UPLC-MS/MS	C14H21NO8	Pyridoxine-5'-O-glucoside	吡哆醇-5'-O-葡萄糖苷	Others	其它类	Vitamin	维生素	-	229780	122550	213370	1562100	611180	743310	1.28644	0.117133	0.281309	5.15572	2.36617	up
Zmhn001703	UPLC-MS/MS	C13H16O10	5-O-Galloyl-D-hamamelose	5-O-没食子酰-D-金缕梅糖	Phenolic acids	酚酸类	Phenolic acids	酚酸类	-	9	9	9	3319200	2102100	3307200	1.40932	0.018715	0.119668	323278	18.3024	up
Lmfn000604	UPLC-MS/MS	C13H16O10	6-O-Galloyl-D-glucose	6-O-没食子酰-D-葡萄糖	Phenolic acids	酚酸类	Phenolic acids	酚酸类	13186-19-1	9	9	9	2909700	2040300	3406400	1.40951	0.0199296	0.124232	309496	18.2396	up
Hmln000659	UPLC-MS/MS	C13H16O10	3-O-Galloyl-D-glucose	3-O-没食子酰-D-葡萄糖	Phenolic acids	酚酸类	Phenolic acids	酚酸类	-	9	9	9	2699500	2036400	3223800	1.4096	0.0163561	0.114056	294804	18.1694	up
MWSmce232	UPLC-MS/MS	C19H12O6	Dicumarol	双香豆素	Lignans and Coumarins	木脂素和香豆素	Coumarins	香豆素	66-76-2	9	9	9	16760	9	21193	1.00212	0.189022	0.354247	1406	10.4574	up
MWSmce310	UPLC-MS/MS	C21H22O4	Bergamottin	佛手柑素	Lignans and Coumarins	木脂素和香豆素	Coumarins	香豆素	7380-40-7	65380	145510	47204	41928	34265	29431	1.0559	0.233196	0.403969	0.409246	-1.28896	down
Xmgp006913	UPLC-MS/MS	C20H20O5	2,4,2',4'-tetrahydroxy-3'-prenylchalcone	2,4,2',4'-四羟基-3'-异戊烯基查尔酮	Flavonoids	黄酮	Chalcones	查耳酮	-	2445100	4084300	1377600	832170	973560	648570	1.20014	0.145372	0.308743	0.310396	-1.68782	down
Hmjp006104	UPLC-MS/MS	C19H21NO5	N-Cis-Feruloyl-3'-O-methyldopamine	N-顺式阿魏酰基-3'-O-甲基多巴胺	Alkaloids	生物碱	Phenolamine	酚胺	-	1492000	1221900	796510	9	11330	9177.3	1.16169	0.0289412	0.144625	0.00584442	-7.41873	down
Zmhp004065	UPLC-MS/MS	C18H16O7	7,8-Dihydroxy-5,6,4'-trimethoxyflavone	7,8-二羟基-5,6,4'-三甲氧基黄酮	Flavonoids	黄酮	Flavones	黄酮	-	8361.9	9	9	138770	37682	121830	1.17614	0.089482	0.245972	35.5949	5.1536	up
mws1474	UPLC-MS/MS	C18H16O7	5,7-Dihydroxy-3',4',5'-trimethoxyflavone	5,7-二羟基-3',4',5'-三甲氧基黄酮	Flavonoids	黄酮	Flavones	黄酮	18103-42-9	8738.4	9	9	239960	60863	215550	1.19852	0.0941194	0.252495	58.9709	5.88193	up
pmp000786	UPLC-MS/MS	C18H16O7	Eupatorin; 3',5-Dihydroxy-4',6,7-Trimethoxyflavone	泽兰黄素; 3',5-二羟基-4',6,7-三甲氧基黄酮	Flavonoids	黄酮	Flavones	黄酮	855-96-9	6160.5	9	9	79316	21833	71175	1.16797	0.0891608	0.245751	27.8909	4.80172	up
Lmmn000774	UPLC-MS/MS	C15H20O9	Dihydrocaffeoylglucose	二氢咖啡酰葡萄糖	Phenolic acids	酚酸类	Phenolic acids	酚酸类	-	134400	240720	337810	125750	33612	36818	1.16199	0.080151	0.233304	0.275174	-1.86158	down
Lmdn001560	UPLC-MS/MS	C15H22O9	6-DeoxyCatalpol	6-脱氧梓醇	Terpenoids	萜类	Monoterpenoids	倍萜	99499-99-7	12987	3949.2	2213.1	11209	45993	18210	1.05303	0.213341	0.384833	3.93811	1.9775	up
mws1629	UPLC-MS/MS	C15H22O9	Aucubin	桃叶珊瑚苷	Terpenoids	萜类	Sesquiterpenoids	倍半萜	479-98-1	9	9	11741	70034	45942	48492	1.11473	0.00976147	0.0911279	13.9866	3.80597	up
Cmrn003066	UPLC-MS/MS	C16H26O8	Kankanoside P	甘蓝苷 P	Terpenoids	萜类	Monoterpenoids	倍萜	-	9	9	9	26410	28073	47002	1.40937	0.0360836	0.156245	3758.7	11.876	up
Cmrn002988	UPLC-MS/MS	C16H26O8	Kankanoside A	甘蓝苷 A	Terpenoids	萜类	Monoterpenoids	倍萜	-	183620	136340	121480	2019	5282.5	6125.6	1.37559	0.0164656	0.114056	0.0304166	-5.039	down
Lmhp011562	UPLC-MS/MS	C21H36O4	1-α-Linolenoyl-glycerol	1-α-亚麻酸甘油酯	Lipids	脂质	Glycerol ester	甘油酯	-	40442	36161	35645	277210	226640	290650	1.4055	0.00699143	0.0784447	7.07808	2.82336	up
Lmhp011388	UPLC-MS/MS	C21H36O4	2-α-Linolenoyl-glycerol	2-α-亚麻酸甘油酯	Lipids	脂质	Glycerol ester	甘油酯	55268-58-1	13994	16476	13681	147270	230850	209950	1.40195	0.0185469	0.119668	13.3195	3.73547	up
MWSmce024	UPLC-MS/MS	C16H18O9	Scopoletin-7-O-glucoside (Scopolin)	东莨菪内酯-7-O-葡萄糖苷 (东莨菪苷)	Lignans and Coumarins	木脂素和香豆素	Coumarins	香豆素	531-44-2	11588000	7510400	8107000	24599000	34849000	26405000	1.35354	0.0148798	0.112935	3.15573	1.65798	up
Lmhp012042	UPLC-MS/MS	C21H38O4	2-Linoleoylglycerol	2-亚油酰甘油酯	Lipids	脂质	Glycerol ester	甘油酯	3443-82-1	609750	617250	571760	137550	321730	198130	1.27635	0.0149624	0.112935	0.36548	-1.45214	down
Zmhn002422	UPLC-MS/MS	C16H20O9	1-O-Feruloyl-β-D-glucose	1-O-阿魏酰-β-D-葡萄糖	Phenolic acids	酚酸类	Phenolic acids	酚酸类	7196-71-6	1406200	2159500	453200	232960	213110	340130	1.16475	0.159948	0.325738	0.195626	-2.35383	down
Lmcp005293	UPLC-MS/MS	C20H20O6	6,7-Dimethoxy-2-[2-(3'-Hydroxy-4'-Methoxyphenyl)Ethyl]Chromone	6,7-二甲氧基-2-[2-(3-羟基-4-甲氧基)苯乙基]色酮	Others	其它类	Others	其它	-	2071000	1029200	1241500	400420	105800	222420	1.27778	0.0546546	0.191795	0.167824	-2.57498	down
Lmdn009099	UPLC-MS/MS	C20H20O6	Coniferyl ferulate	阿魏酸松柏酯	Phenolic acids	酚酸类	Phenolic acids	酚酸类	63644-62-2	42988	49769	40926	6416.9	12813	32131	1.08022	0.0582912	0.197362	0.384199	-1.38007	down
Zmhn003082	UPLC-MS/MS	C15H18O10	5-O-Galloyl-methyl quinine ester	5-O-没食子酰-奎宁酸甲酯	Phenolic acids	酚酸类	Phenolic acids	酚酸类	-	9	9	9	69160	62080	67955	1.40954	0.00108342	0.0458236	7377.59	12.8489	up
pmb3107	UPLC-MS/MS	C15H20O10	Glucosyringic Acid	葡萄糖基丁香酸	Phenolic acids	酚酸类	Phenolic acids	酚酸类	-	439470	910860	3166200	12649000	9266800	13205000	1.25806	0.0037012	0.0599359	7.77606	2.95904	up
pmb0752	UPLC-MS/MS	C17H20O9	3-O-Feruloylquinic acid*	3-O-阿魏酰奎宁酸*	Phenolic acids	酚酸类	Phenolic acids	酚酸类	1899-29-2	1229900	513990	371900	1715700	1988900	2369100	1.20466	0.0189702	0.120867	2.87065	1.52138	up
Lmbp002309	UPLC-MS/MS	C17H22O9	Sinapaldehyde-4-O-Glucoside	芥子醛-4-O-葡萄糖苷	Phenolic acids	酚酸类	Phenolic acids	酚酸类	154461-65-1	7396.8	2266.3	1122.4	19050	4993	21908	1.0463	0.142593	0.305853	4.26044	2.091	up
Hmln003558	UPLC-MS/MS	C21H24O6	Arctigenin	牛蒡子苷元	Lignans and Coumarins	木脂素和香豆素	Lignans	木脂素	7770-78-7	24602	77510	11650	882.21	9	9	1.26882	0.202767	0.371775	0.0079131	-6.98154	down
mws1574	UPLC-MS/MS	C16H22O10	Geniposidic acid	京尼平苷酸	Terpenoids	萜类	Monoterpenoids	倍萜	27741-01-1	69322	56294	56603	9	9	31010	1.03458	0.0260947	0.137325	0.170279	-2.55403	down
Lmdn001501	UPLC-MS/MS	C16H22O10	Gardoside	栀子新苷	Terpenoids	萜类	Monoterpenoids	倍萜	54835-76-6	46592	61812	61918	9	9	28808	1.03553	0.0219254	0.126143	0.169244	-2.56282	down
Cmlp002163	UPLC-MS/MS	C16H22O10	Gentioflavoside	龙胆黄苷	Terpenoids	萜类	Monoterpenoids	倍萜	34239-17-3	216490	201930	152980	78683	111400	38361	1.18365	0.0163611	0.114056	0.399797	-1.32266	down
Hmlp002744	UPLC-MS/MS	C20H22O7	Nortrachelogenin	去甲络石苷元	Lignans and Coumarins	木脂素和香豆素	Lignans	木脂素	34444-37-6	102720	135920	77779	44950	24347	24656	1.3036	0.0337918	0.153497	0.296926	-1.75183	down
Lmzn001983	UPLC-MS/MS	C16H24O10	D-Threo-guaiacylglycerol-7-O-β-D-glucoside	D-苏式-愈创木基甘油-7-O-β-D-葡萄糖苷	Phenolic acids	酚酸类	Phenolic acids	酚酸类	-	97382	73218	80046	844850	1729500	1073000	1.39	0.050616	0.187221	14.5518	3.86313	up
Hmap007816	UPLC-MS/MS	C24H30O4	Feselol	Feselol	Lignans and Coumarins	木脂素和香豆素	Coumarins	香豆素	51020-36-1	353860	392850	528210	9	9	9	1.40949	0.0151059	0.113068	2.11778e-05	-15.5271	down
Lmjp003090	UPLC-MS/MS	C17H20O10	Isofraxidin-7-O-glucoside	异秦皮啶-7-O-葡萄糖苷	Lignans and Coumarins	木脂素和香豆素	Coumarins	香豆素	483-91-0	9	19456	9	947460	68209	1077300	1.17635	0.160934	0.326884	107.475	6.74786	up
Zmcp102801	UPLC-MS/MS	C17H20O10	Saikochromoside A	柴胡色原酮苷A	Others	其它类	Others	其它	-	6468900	3840300	4211400	1105900	288270	1387600	1.22001	0.0281779	0.142578	0.191574	-2.38403	down
Zmhn002227	UPLC-MS/MS	C17H22O10	4-O-Glucosyl-sinapate	4-O-葡萄糖基芥子酸	Phenolic acids	酚酸类	Phenolic acids	酚酸类	-	1190300	921210	1437000	2642700	2390900	2330900	1.32153	0.00358063	0.0599359	2.07538	1.05337	up
HJN003	UPLC-MS/MS	C17H22O10	1-O-Sinapoyl-D-glucose	1-O-芥子酰-D-葡萄糖	Phenolic acids	酚酸类	Phenolic acids	酚酸类	-	356230	781130	651820	1735600	2261000	2427800	1.31296	0.00600488	0.0722457	3.5907	1.84426	up
Zmbp010005	UPLC-MS/MS	C21H22O7	Pteryxin	Pteryxin	Lignans and Coumarins	木脂素和香豆素	Coumarins	香豆素	13161-75-6	9	9	9	44098	28992	17804	1.40483	0.0578315	0.196892	3366.44	11.717	up
Cmdp003280	UPLC-MS/MS	C17H24O10	7-Dehydroxyzaluzioside	7-Dehydroxyzaluzioside	Terpenoids	萜类	Monoterpenoids	倍萜	-	172660	113460	163370	490420	538730	697740	1.37184	0.0150032	0.112935	3.84189	1.94182	up
Zmjp003597	UPLC-MS/MS	C19H32O8	Ampelopsisionoside	蛇葡萄紫罗兰酮糖苷	Others	其它类	Others	其它	-	388850	688880	742140	2927500	911730	4902300	1.12217	0.182073	0.348892	4.80338	2.26405	up
Lmwp011196	UPLC-MS/MS	C24H38O4	Bis(2-ethylhexyl)phthalate	邻苯二甲酸二(2-乙基己基)酯	Phenolic acids	酚酸类	Phenolic acids	酚酸类	117-81-7	631130	209440	836050	3039600	3647600	1520700	1.20246	0.0650899	0.207358	4.8955	2.29146	up
pmb0489	UPLC-MS/MS	C19H28N2O7	N-Glucosyl-p-coumaroylputrescine	N-葡萄糖基对香豆酰腐胺	Alkaloids	生物碱	Phenolamine	酚胺	-	3898.8	3431.4	3923.2	10386	6582.6	11756	1.31335	0.0624525	0.203684	2.55253	1.35193	up
Cmbp005948	UPLC-MS/MS	C21H20O8	1-O-p-Hydroxycinnamoyl-3-O-caffeoylglycerol	1-O-对羟基肉桂酰基-3-O-咖啡酰甘油	Phenolic acids	酚酸类	Phenolic acids	酚酸类	-	820170	698990	291400	137960	260620	318790	1.02318	0.139874	0.303941	0.396214	-1.33565	down
Hmln003529	UPLC-MS/MS	C18H26O10	Benzyl β-primeveroside	苯甲酰樱草糖苷	Phenolic acids	酚酸类	Phenolic acids	酚酸类	130622-31-0	127470	72694	78799	2802.8	1677	9	1.18916	0.0338141	0.153497	0.016091	-5.9576	down
Cmjn004337	UPLC-MS/MS	C18H26O10	Benzyl-(2''-O-xylosyl)glucoside	苄基-(2''-O-木糖基)葡萄糖苷	Phenolic acids	酚酸类	Phenolic acids	酚酸类	-	283700	369530	561750	51998	105360	109050	1.302	0.0552626	0.191795	0.219269	-2.18922	down
Cmbn003192	UPLC-MS/MS	C18H24O11	Regaloside K	王百合苷K	Phenolic acids	酚酸类	Phenolic acids	酚酸类	138772-00-6	19201	23044	11500	46723	39737	47793	1.28889	0.00411942	0.0622801	2.49796	1.32075	up
Lmbp003668	UPLC-MS/MS	C20H18O10	Kaempferol-3-O-arabinoside	山奈酚-3-O-阿拉伯糖苷	Flavonoids	黄酮	Flavonols	黄酮醇	-	18518000	28803000	12101000	9	46051	9	1.26933	0.055429	0.191795	0.000775285	-10.333	down
Hmcn002743	UPLC-MS/MS	C22H26O8	Lirioresinol A	鹅掌揪树脂醇 A	Lignans and Coumarins	木脂素和香豆素	Lignans	木脂素	-	113650	115470	214720	247460	288820	436590	1.17427	0.0712513	0.217286	2.19194	1.13221	up
MWS20152	UPLC-MS/MS	C22H26O8	Syringaresinol	丁香树脂酚	Lignans and Coumarins	木脂素和香豆素	Lignans	木脂素	21453-71-4	18405	22139	38954	47807	51605	74450	1.18565	0.0432272	0.168012	2.187	1.12895	up
Lmhp008337	UPLC-MS/MS	C19H40NO7P	LysoPE 14:0(2n isomer)	溶血磷脂酰乙醇胺 14:0(2n异构)	Lipids	脂质	LPE	溶血磷脂酰乙醇胺	-	55964	103990	106860	288120	210340	193750	1.25291	0.0215497	0.126143	2.59435	1.37538	up
pmb0864	UPLC-MS/MS	C19H40NO7P	LysoPE 14:0	溶血磷脂酰乙醇胺 14:0	Lipids	脂质	LPE	溶血磷脂酰乙醇胺	-	58337	111040	98351	261470	199260	204190	1.27418	0.00750235	0.0801448	2.48357	1.31241	up
Cmbn003996	UPLC-MS/MS	C19H26O11	Regaloside G	王百合苷G	Phenolic acids	酚酸类	Phenolic acids	酚酸类	120601-64-1	24918	14743	43414	65528	59386	42160	1.04992	0.064415	0.206313	2.01112	1.008	up
pme0321	UPLC-MS/MS	C21H20O10	Kaempferol-7-O-rhamnoside	山奈酚-7-O-鼠李糖苷	Flavonoids	黄酮	Flavonols	黄酮醇	20196-89-8	12233000	10887000	4191400	9	63436	9	1.23688	0.0674535	0.211118	0.00232335	-8.74958	down
Lmfn004036	UPLC-MS/MS	C20H18O11	Morin-3-O-lyxoside	桑色素-3-O-来苏糖苷	Flavonoids	黄酮	Flavonols	黄酮醇	-	17909000	30405000	28214000	1303500	3807700	1918500	1.35511	0.0231149	0.129269	0.0918579	-3.44445	down
mws4183	UPLC-MS/MS	C20H18O11	Quercetin-3-O-arabinoside (Guaijaverin)	槲皮素-3-O-阿拉伯糖苷(番石榴苷)	Flavonoids	黄酮	Flavonols	黄酮醇	22255-13-6	19934000	37358000	27791000	864270	1904900	1090400	1.3853	0.0324916	0.151154	0.0453624	-4.46236	down
Lmfn004065	UPLC-MS/MS	C20H18O11	Morin-3-O-arabinoside	桑色素-3-O-阿拉伯糖苷	Flavonoids	黄酮	Flavonols	黄酮醇	-	21185000	34929000	28187000	1375500	4781400	2343700	1.34044	0.0186502	0.119668	0.100836	-3.30991	down
mws2186	UPLC-MS/MS	C20H18O11	Avicularin(Quercetin-3-O-α-L-arabinofuranoside)	扁蓄苷(广寄生苷)	Flavonoids	黄酮	Flavonols	黄酮醇	572-30-5	60340000	79158000	46401000	3735500	10493000	6031500	1.34968	0.0242966	0.131748	0.108984	-3.19781	down
HJN087	UPLC-MS/MS	C21H22O10	Naringenin-4'-O-glucoside	柚皮素-4'-O-葡萄糖苷	Flavonoids	黄酮	Flavones	黄酮	-	122140	119480	116790	162600	639730	372860	1.1259	0.187344	0.353028	3.2789	1.71321	up
Lman003972	UPLC-MS/MS	C21H22O10	6-O-Caffeoylarbutin	6-O-咖啡酰熊果苷	Phenolic acids	酚酸类	Phenolic acids	酚酸类	136172-60-6	72995	125350	39822	9	9	9	1.40516	0.0858817	0.241661	0.000113366	-13.1067	down
HJN090	UPLC-MS/MS	C21H22O10	Butin-7-O-glucoside	紫铆素-7-O-葡萄糖苷	Flavonoids	黄酮	Flavones	黄酮	-	117710	120400	72832	206630	594140	333150	1.23229	0.135617	0.300487	3.64673	1.8666	up
Lmhp008440	UPLC-MS/MS	C20H40NO7P	LysoPE 15:1	溶血磷脂酰乙醇胺 15:1	Lipids	脂质	LPE	溶血磷脂酰乙醇胺	-	17588	14504	23232	107730	43484	62543	1.27676	0.106704	0.269117	3.86373	1.94999	up
Lmhp008885	UPLC-MS/MS	C20H42NO7P	LysoPE 15:0(2n isomer)	溶血磷脂酰乙醇胺 15:0(2n异构)	Lipids	脂质	LPE	溶血磷脂酰乙醇胺	-	13133	6235.8	3229.4	41534	37947	18699	1.20284	0.0548612	0.191795	4.34459	2.11922	up
Lmhp009187	UPLC-MS/MS	C20H42NO7P	LysoPE 15:0	溶血磷脂酰乙醇胺 15:0	Lipids	脂质	LPE	溶血磷脂酰乙醇胺	-	57778	73543	49050	264470	215270	193270	1.3726	0.0097944	0.0911279	3.73125	1.89966	up
mws0913	UPLC-MS/MS	C21H20O11	Kaempferol-3-O-galactoside (Trifolin)	山奈酚-3-O-半乳糖苷(三叶豆苷)	Flavonoids	黄酮	Flavonols	黄酮醇	23627-87-4	1751800	3475500	1543200	508240	241580	495510	1.29817	0.0922158	0.250341	0.183935	-2.44273	down
pmn001716	UPLC-MS/MS	C21H20O11	Carthamone	醌式红花苷	Flavonoids	黄酮	Chalcones	查耳酮	86579-00-2	1708700	2427300	1122700	216260	110840	215570	1.35534	0.0519228	0.188657	0.103195	-3.27656	down
MWS20150	UPLC-MS/MS	C21H20O11	Luteolin-7-O-glucoside (Cynaroside)	木犀草素-7-O-葡萄糖苷 (木犀草苷)	Flavonoids	黄酮	Flavones	黄酮	5373-11-5	6834400	15224000	6464000	289980	537930	382070	1.37803	0.0860475	0.241746	0.0424221	-4.55904	down
mws0089	UPLC-MS/MS	C21H20O11	Kaempferol-7-O-glucoside	山奈酚-7-O-葡萄糖苷	Flavonoids	黄酮	Flavonols	黄酮醇	16290-07-6	1820400	3670200	1830000	308040	348370	492020	1.34596	0.0777445	0.22963	0.156876	-2.6723	down
pmd0160	UPLC-MS/MS	C21H44NO7P	LysoPE 16:0(2n isomer)	溶血磷脂酰乙醇胺 16:0(2n异构)	Lipids	脂质	LPE	溶血磷脂酰乙醇胺	-	575510	574680	675370	2114500	1461800	1151700	1.29826	0.0743516	0.224439	2.58989	1.37289	up
Lmqn012798	UPLC-MS/MS	C30H46O3	Urs-12(13)-en-3-one-28-oic acid	乌苏-12(13)-烯-3-酮-28-羧酸	Terpenoids	萜类	Triterpene	三萜	-	9	9	9	9	33296	13169	1.00638	0.250819	0.419031	1721.26	10.7492	up
Lmdn006811	UPLC-MS/MS	C30H48O3	Soyasapogenol E	大豆皂醇 E	Terpenoids	萜类	Triterpene	三萜	6750-59-0	7547.9	3282.8	5850.9	75089	28272	67720	1.33456	0.0702948	0.216784	10.2557	3.35835	up
mws4053	UPLC-MS/MS	C30H48O3	Ursolic acid	熊果酸	Terpenoids	萜类	Triterpene	三萜	77-52-1	9	1532.6	3869.7	42707	157670	95430	1.14508	0.100216	0.261314	54.6647	5.77254	up
pmn001700	UPLC-MS/MS	C30H48O3	24,30-Dihydroxy-12(13)-enolupinol	24,30-二羟基-12(13)烯羽扇豆醇	Terpenoids	萜类	Triterpene	三萜	-	3810.4	1472.3	5756.5	60776	34471	57471	1.3407	0.0271241	0.139885	13.8342	3.79016	up
pmb0464	UPLC-MS/MS	C16H27NO14	L-Aspartic acid-O-diglucoside	L-天冬氨酸-O-二葡萄糖苷	Amino acids and derivatives	氨基酸及其衍生物	Amino acids and derivatives	氨基酸及其衍生物	-	449820	485340	473180	895410	1797400	1768100	1.30784	0.0749784	0.224581	3.1675	1.66334	up
mws4167	UPLC-MS/MS	C21H18O12	Luteolin-7-O-glucuronide	木犀草素-7-O-葡萄糖醛酸苷	Flavonoids	黄酮	Flavones	黄酮	29741-10-4	55254	13444	59716	30487000	31726000	43322000	1.39573	0.0132644	0.105641	821.834	9.6827	up
Lmzn001894	UPLC-MS/MS	C21H18O12	Kaempferol-3-O-glucuronide	山奈酚-3-O-葡萄糖醛酸苷	Flavonoids	黄酮	Flavonols	黄酮醇	22688-78-4	9	9	9	27173000	21854000	33772000	1.40969	0.0152428	0.113068	3.06663e+06	21.5482	up
MWSHY0035	UPLC-MS/MS	C21H18O12	Scutellarein-7-O-glucuronide (Scutellarin)	野黄芩素-7-O-葡萄糖醛酸苷 (野黄芩苷)	Flavonoids	黄酮	Flavones	黄酮	27740-01-8	27690	30262	9012.2	32974000	32569000	42757000	1.40344	0.00841465	0.0843356	1617.28	10.6594	up
Lmdp003171	UPLC-MS/MS	C22H22O11	Azalein (Azaleatin-3-O-rhamnoside)	杜鹃黄苷	Flavonoids	黄酮	Flavonols	黄酮醇	29028-02-2	6437700	16914000	8689900	9	9	9	1.40849	0.0785357	0.231201	8.42655e-07	-20.1786	down
pmp000579	UPLC-MS/MS	C22H22O11	Diosmetin-7-O-galactoside	香叶木素-7-O-半乳糖苷	Flavonoids	黄酮	Flavones	黄酮	-	1229400	1644700	722990	3374700	3138100	3417400	1.28839	0.00980743	0.0911279	2.76062	1.46499	up
Lmjp003655	UPLC-MS/MS	C22H22O11	6-C-MethylKaempferol-3-glucoside	6-甲基山奈酚-3-O-葡萄糖苷	Flavonoids	黄酮	Flavones	黄酮	-	1283600	1771500	805010	3142200	3207500	3720500	1.28328	0.00551896	0.0693368	2.60879	1.38338	up
Hmmp004965	UPLC-MS/MS	C22H22O11	Diosmetin-7-O-glucoside	香叶木素-7-O-葡萄糖苷	Flavonoids	黄酮	Flavones	黄酮	20126-59-4	1105400	1706500	795860	3063300	3602400	3577300	1.30519	0.0038672	0.0605994	2.83916	1.50546	up
Hmgp002189	UPLC-MS/MS	C22H22O11	Hispidulin-7-O-Glucoside	高车前素-7-O-葡萄糖苷	Flavonoids	黄酮	Flavones	黄酮	17680-84-1	1311400	1651500	818460	2791200	3400300	3599000	1.29369	0.00427925	0.0625753	2.58915	1.37248	up
Lmdp003286	UPLC-MS/MS	C21H20O12	Isohyperoside	异金丝桃苷	Flavonoids	黄酮	Flavonols	黄酮醇	35589-21-0	814430	2044200	479920	20851000	34428000	20329000	1.35818	0.0336228	0.153409	22.647	4.50125	up
mws0061	UPLC-MS/MS	C21H20O12	Quercetin-3-O-galactoside (Hyperin)	槲皮素-3-O-半乳糖苷 (金丝桃苷)	Flavonoids	黄酮	Flavonols	黄酮醇	482-36-0	19206000	43556000	19041000	46790000	69636000	49222000	1.10931	0.0631932	0.205344	2.02496	1.0179	up
Smgp004575	UPLC-MS/MS	C21H20O12	Quercetin-5-O-β-D-glucoside	槲皮素-5-O-β-D-葡萄糖苷	Flavonoids	黄酮	Flavonols	黄酮醇	-	969120	2318600	469690	18662000	31213000	19685000	1.3455	0.0300846	0.146355	18.5128	4.21045	up
pmd0130	UPLC-MS/MS	C22H46NO7P	LysoPC 14:0	溶血磷脂酰胆碱 14:0	Lipids	脂质	LPC	溶血磷脂酰胆碱	20559-16-4	1241900	1654400	653160	3698400	3997100	2846700	1.25548	0.00717504	0.0790032	2.97009	1.5705	up
HJAP154	UPLC-MS/MS	C23H16O11	Galloylisorhamnetin	没食子酰异鼠李素	Flavonoids	黄酮	Flavonols	黄酮醇	-	251610	104780	88467	40527	10709	61338	1.07403	0.158502	0.323666	0.253057	-1.98247	down
Hmmp002121	UPLC-MS/MS	C23H16O11	Isorhamnetin-3-O-gallate	异鼠李素-3-O-没食子酸酯	Flavonoids	黄酮	Flavonols	黄酮醇	-	274300	82519	105090	31231	14467	80128	1.04188	0.198151	0.366178	0.272404	-1.87618	down
Hmjn008136	UPLC-MS/MS	C30H46O4	Camaldulenic acid	脱氢山楂酸	Terpenoids	萜类	Triterpene	三萜	71850-15-2	34875	16951	119640	691790	471330	397390	1.26709	0.0241341	0.131266	9.10099	3.18602	up
pmn001704	UPLC-MS/MS	C30H46O4	2,3-Dihydroxy-5(6),12(13)-diene-ursolic acid	2,3-二羟基-5(6),12(13)-二烯熊果酸	Terpenoids	萜类	Triterpene	三萜	-	9	9	5782	29533	21130	15696	1.10837	0.0222057	0.126143	11.4412	3.51617	up
Lmsn012627	UPLC-MS/MS	C30H46O4	2α,3α-Dihydroxyurs-12,18-dien-28-oic acid	2α,3α-二羟基熊果-12,18-二烯-28-酸	Terpenoids	萜类	Triterpene	三萜	-	9	9	7405.2	29901	19453	15734	1.08413	0.0260644	0.137325	8.76819	3.13228	up
Lmmn009932	UPLC-MS/MS	C31H50O3	Ambolic acid	阿波醇酸	Terpenoids	萜类	Triterpene	三萜	13878-93-8	51441	37114	62796	134420	108010	96780	1.28204	0.0131967	0.105574	2.24121	1.16428	up
MWSmce560	UPLC-MS/MS	C30H48O4	23-Hydroxybetulinic acid	23-羟基白桦脂酸	Terpenoids	萜类	Triterpene	三萜	85999-40-2	2282.8	7815.8	5311	34716	15853	16199	1.20606	0.102805	0.263166	4.33288	2.11533	up
Smpn011792	UPLC-MS/MS	C30H48O4	2,3-dihydroxy-12-ursen-28-oic acid	2,3-二羟基-12-熊果烯-28-酸	Terpenoids	萜类	Triterpene	三萜	-	9	9	9	82985	113640	101000	1.4095	0.00794388	0.0814476	11023.1	13.4282	up
pmb0874	UPLC-MS/MS	C23H44NO7P	LysoPE 18:2(2n isomer)	溶血磷脂酰乙醇胺 18:2(2n异构)	Lipids	脂质	LPE	溶血磷脂酰乙醇胺	-	2873700	2359700	2916300	8591900	5915300	6202200	1.34782	0.0339899	0.153514	2.54112	1.34547	up
pmb0881	UPLC-MS/MS	C23H44NO7P	LysoPE 18:2	溶血磷脂酰乙醇胺 18:2	Lipids	脂质	LPE	溶血磷脂酰乙醇胺	-	2580500	2659400	2338300	7959500	6599500	5588100	1.37035	0.024004	0.131072	2.65856	1.41065	up
Zmhn004909	UPLC-MS/MS	C21H18O13	3,4-Digalloylshikimic acid	3,4-二没食子酰莽草酸	Phenolic acids	酚酸类	Phenolic acids	酚酸类	-	9	9	9	263390	298260	278660	1.40956	0.00129567	0.0460721	31122.6	14.9257	up
Hmjp003123	UPLC-MS/MS	C21H18O13	Quercetin-5-O-glucuronide	槲皮素-5-O-葡萄糖醛酸苷	Flavonoids	黄酮	Flavonols	黄酮醇	-	9	9	852.63	2126400	2177300	1250400	1.35119	0.0254111	0.135324	6379.4	12.6392	up
Lmfn003760	UPLC-MS/MS	C21H18O13	Quercetin-4'-O-glucuronide	槲皮素-4'-O-葡萄糖醛酸苷	Flavonoids	黄酮	Flavonols	黄酮醇	201463-36-7	9	9	9	10367000	12067000	13202000	1.40974	0.0047751	0.0650452	1.31985e+06	20.3319	up
Hmcp002207	UPLC-MS/MS	C22H22O12	Isorhamnetin-7-O-glucoside (Brassicin)	异鼠李素-7-O-葡萄糖苷 (蔓菁苷)	Flavonoids	黄酮	Flavonols	黄酮醇	6743-96-0	342680	2709600	742380	14401000	15452000	11922000	1.28648	0.000995458	0.0457805	11.0089	3.4606	up
Lmjp003044	UPLC-MS/MS	C22H22O12	Isorhamnetin-3-O-Glucoside	异鼠李素-3-O-葡萄糖苷	Flavonoids	黄酮	Flavonols	黄酮醇	5041-82-7	344270	2428800	1155600	13541000	15141000	12776000	1.28974	0.000193136	0.0265042	10.5527	3.39954	up
Lmjp002906	UPLC-MS/MS	C22H22O12	Rhamnetin-3-O-Glucoside	鼠李素-3-O-葡萄糖苷	Flavonoids	黄酮	Flavonols	黄酮醇	27875-34-9	342010	2697900	1227700	14729000	16513000	12719000	1.27655	0.00119733	0.0458236	10.3011	3.36472	up
Hmgp002148	UPLC-MS/MS	C22H22O12	Nepetin-7-O-alloside	泽兰黄酮-7-O-阿洛糖苷	Flavonoids	黄酮	Flavones	黄酮	-	340010	2589700	953930	12642000	15058000	12218000	1.28434	0.000595962	0.0419233	10.2785	3.36156	up
Lmnn002886	UPLC-MS/MS	C23H26O11	1'-O-(3,4-Dihydroxyphenethyl)-O-caffeoyl-glucoside	1'-O-(3,4-二羟基苯乙基)-O-咖啡酰基-葡萄糖苷	Phenolic acids	酚酸类	Phenolic acids	酚酸类	-	9	9	9	58399000	60777000	76672000	1.40977	0.00763155	0.0805603	7.25363e+06	22.7903	up
mws1454	UPLC-MS/MS	C23H26O11	Persicoside	桃苷	Flavonoids	黄酮	Flavanones	二氢黄酮	28978-03-2	18725	54274	27022	9	9	9	1.40567	0.089987	0.24698	0.000269943	-11.8551	down
Lmpp003296	UPLC-MS/MS	C21H19O13+	Delphinidin-3-O-glucuronide	飞燕草素-3-O-葡萄糖醛酸苷	Flavonoids	黄酮	Anthocyanidins	花青素	-	839.96	1732.5	818.72	21381000	19715000	24835000	1.40809	0.00467432	0.0650452	19441.9	14.2469	up
pmb2260	UPLC-MS/MS	C23H46NO7P	LysoPC 15:1	溶血磷脂酰胆碱 15:1	Lipids	脂质	LPC	溶血磷脂酰胆碱	-	37154	64838	40556	203240	202760	245220	1.3732	0.00123292	0.0458236	4.56843	2.1917	up
pmb0856	UPLC-MS/MS	C23H46NO7P	LysoPE 18:1(2n isomer)	溶血磷脂酰乙醇胺 18:1(2n异构)	Lipids	脂质	LPE	溶血磷脂酰乙醇胺	-	193800	148520	224670	562300	478580	457410	1.35398	0.00216507	0.0521958	2.64253	1.40192	up
pmb2319	UPLC-MS/MS	C23H48NO7P	LysoPC 15:0	溶血磷脂酰胆碱 15:0	Lipids	脂质	LPC	溶血磷脂酰胆碱	108273-89-8	1409700	1284400	1090200	3348100	3783800	3193600	1.38782	0.00157597	0.0469042	2.72851	1.44811	up
Lmhp009129	UPLC-MS/MS	C23H48NO7P	LysoPC 15:0(2n isomer)	溶血磷脂酰胆碱 15:0(2n异构)	Lipids	脂质	LPC	溶血磷脂酰胆碱	-	67473	102690	37324	350060	374150	226520	1.29713	0.0202545	0.124232	4.58212	2.19601	up
pmb0883	UPLC-MS/MS	C23H48NO7P	LysoPE 18:0	溶血磷脂酰乙醇胺 18:0	Lipids	脂质	LPE	溶血磷脂酰乙醇胺	69747-55-3	87927	107570	74483	312930	292940	210750	1.34792	0.0206516	0.124468	3.02474	1.59681	up
Li512114	UPLC-MS/MS	C31H50O4	Corosolic Acid Methyl Ester	科罗索酸甲酯	Terpenoids	萜类	Triterpene	三萜	4518-70-1	2092.5	1462.4	10081	99680	23728	60349	1.24758	0.120439	0.285514	13.476	3.75232	up
pmp001142	UPLC-MS/MS	C24H29NO10	Cimicifugamide A	升麻酰胺 A	Alkaloids	生物碱	Phenolamine	酚胺	-	32946	34502	67462	2267.3	5416.3	20782	1.13117	0.0680953	0.211843	0.210997	-2.24471	down
pma1303	UPLC-MS/MS	C24H46NO7P	LysoPC 16:2	溶血磷脂酰胆碱 16:2	Lipids	脂质	LPC	溶血磷脂酰胆碱	-	74977	50743	47652	138060	151180	134770	1.3452	0.00276867	0.0570085	2.44567	1.29023	up
pmb0863	UPLC-MS/MS	C24H46NO7P	LysoPC 16:2(2n isomer)	溶血磷脂酰胆碱 16:2(2n异构)	Lipids	脂质	LPC	溶血磷脂酰胆碱	-	70527	56000	28945	143140	134120	127710	1.25181	0.0126419	0.103455	2.60478	1.38116	up
pmp001164	UPLC-MS/MS	C23H24O12	Iristectorin B	鸢尾新苷	Flavonoids	黄酮	Isoflavones	异黄酮	94396-09-5	9	9	9	883950	680360	782970	1.40935	0.00559509	0.0698016	86936.3	16.4077	up
pmp001270	UPLC-MS/MS	C24H48NO7P	LysoPC 16:1	溶血磷脂酰胆碱 16:1	Lipids	脂质	LPC	溶血磷脂酰胆碱	76790-27-7	267150	508560	276240	1675500	976890	1203400	1.30819	0.0323093	0.151154	3.66537	1.87396	up
Lmtn002997	UPLC-MS/MS	C22H22O13	Mearnsetin-3-O-glucoside	3,5,7,3',5'-五羟基-4'-甲氧基黄酮-3-O-葡萄糖苷	Flavonoids	黄酮	Flavones	黄酮	-	3165700	11665000	909840	493090	93772	673140	1.08055	0.278223	0.441428	0.0800482	-3.64299	down
Lmsn004321	UPLC-MS/MS	C22H22O13	1-O-Caffeoyl-3-O-galloyl-β-D-glucose	1-O-咖啡酰-3-O-没食子酰-β-D-葡萄糖	Phenolic acids	酚酸类	Phenolic acids	酚酸类	-	9	9	9	9	12274	35511	1.00861	0.265772	0.432475	1770.15	10.7897	up
pmb0855	UPLC-MS/MS	C24H50NO7P	LysoPC 16:0	溶血磷脂酰胆碱 16:0	Lipids	脂质	LPC	溶血磷脂酰胆碱	17364-16-8	7769200	7865600	6522500	17534000	21415000	15740000	1.36852	0.0178959	0.117293	2.46822	1.30347	up
pmd0132	UPLC-MS/MS	C24H50NO7P	LysoPC 16:0(2n isomer)	溶血磷脂酰胆碱 16:0(2n异构)	Lipids	脂质	LPC	溶血磷脂酰胆碱	-	1841600	1843800	1663700	5856700	6797500	4666700	1.37971	0.0221967	0.126143	3.2381	1.69515	up
pmn001642	UPLC-MS/MS	C23H20O13	Kaempferol-3-O-(2''-O-acetyl)glucuronide	山奈酚-3-O-(2''-O-乙酰)葡萄糖醛酸苷	Flavonoids	黄酮	Flavonols	黄酮醇	-	2784300	1278000	1256500	784360	499800	854030	1.13554	0.166074	0.331438	0.402006	-1.31471	down
pmb3000	UPLC-MS/MS	C24H24O12	Chrysoeriol-7-O-(6''-acetyl)glucoside	金圣草黄素-7-O-(6''-乙酰)葡萄糖苷	Flavonoids	黄酮	Flavones	黄酮	-	125650	44415	35220	316160	177080	228900	1.20659	0.0303754	0.146459	3.51774	1.81465	up
pmp001141	UPLC-MS/MS	C25H31NO10	Cimicifugamide	升麻酰胺	Alkaloids	生物碱	Phenolamine	酚胺	-	60148	15076	39064	197350	137520	120370	1.21853	0.0217955	0.126143	3.98327	1.99395	up
Lmhp008718	UPLC-MS/MS	C25H48NO7P	LysoPC 17:2	溶血磷脂酰胆碱 17:2	Lipids	脂质	LPC	溶血磷脂酰胆碱	-	123170	123710	53258	349170	371800	360650	1.3064	0.00508718	0.0672262	3.60374	1.8495	up
Lmhp010514	UPLC-MS/MS	C25H48NO7P	LysoPE 20:2(2n isomer)	溶血磷脂酰乙醇胺 20:2(2n异构)	Lipids	脂质	LPE	溶血磷脂酰乙醇胺	-	131650	123040	106590	368490	308760	216560	1.31037	0.0532358	0.189683	2.47401	1.30685	up
Lmhp010757	UPLC-MS/MS	C25H48NO7P	LysoPE 20:2	溶血磷脂酰乙醇胺 20:2	Lipids	脂质	LPE	溶血磷脂酰乙醇胺	-	135240	136610	103390	358770	322480	233200	1.32128	0.0322358	0.151154	2.43697	1.28509	up
Hmln002199	UPLC-MS/MS	C23H22O13	Quercetin-3-O-(6''-O-acetyl)galactoside	槲皮素-3-O-(6''-O-乙酰)半乳糖苷	Flavonoids	黄酮	Flavonols	黄酮醇	-	2361200	2632700	1280300	14642000	12040000	12190000	1.36887	0.00160379	0.0469042	6.19553	2.63123	up
Lmhp009590	UPLC-MS/MS	C25H50NO7P	LysoPC 17:1	溶血磷脂酰胆碱 17:1	Lipids	脂质	LPC	溶血磷脂酰胆碱	-	91585	77927	44357	175860	167330	91716	1.06814	0.0918378	0.250341	2.03352	1.02398	up
pmb2406	UPLC-MS/MS	C25H52NO7P	LysoPC 17:0	溶血磷脂酰胆碱 17:0	Lipids	脂质	LPC	溶血磷脂酰胆碱	50930-23-9	84686	81168	55637	333610	348790	203730	1.33974	0.036233	0.156513	4.00075	2.00027	up
Lmhp010515	UPLC-MS/MS	C25H52NO7P	LysoPC 17:0(2n isomer)	溶血磷脂酰胆碱 17:0(2n异构)	Lipids	脂质	LPC	溶血磷脂酰胆碱	-	83648	96055	65118	346000	445510	210170	1.32029	0.0635898	0.205432	4.09148	2.03262	up
pmb0865	UPLC-MS/MS	C26H48NO7P	LysoPC 18:3(2n isomer)	溶血磷脂酰胆碱 18:3(2n异构)	Lipids	脂质	LPC	溶血磷脂酰胆碱	-	4870700	5951900	2713900	12156000	10752000	11536000	1.27277	0.00919338	0.0889832	2.54453	1.3474	up
pmb0854	UPLC-MS/MS	C26H48NO7P	LysoPC 18:3	溶血磷脂酰胆碱 18:3	Lipids	脂质	LPC	溶血磷脂酰胆碱	-	3863700	5223100	2849300	12161000	9964800	11079000	1.33185	0.00166774	0.0470293	2.78188	1.47606	up
pmp001273	UPLC-MS/MS	C26H50NO7P	LysoPC 18:2	溶血磷脂酰胆碱 18:2	Lipids	脂质	LPC	溶血磷脂酰胆碱	-	4117800	3807900	2338300	10872000	7424700	7861000	1.28651	0.022866	0.128279	2.54849	1.34964	up
pmn001644	UPLC-MS/MS	C23H20O14	Quercetin-3-O-(2''-acetyl)glucuronide	槲皮素-3-O-(2''-乙酰)葡萄糖醛酸苷	Flavonoids	黄酮	Flavonols	黄酮醇	-	276100	527230	190220	3128300	3568000	3211700	1.36827	0.000103215	0.0167396	9.97232	3.31793	up
Li512111	UPLC-MS/MS	C24H24O13	Isorhamnetin-3-O-(6''-acetylglucoside)	异鼠李素-3-O-(6''-乙酰)葡萄糖苷	Flavonoids	黄酮	Flavonols	黄酮醇	-	819240	2673700	1761300	18689000	13684000	13473000	1.3385	0.0100546	0.0912701	8.72552	3.12524	up
pmp000682	UPLC-MS/MS	C26H32O11	Matairesinol-4'-O-glucoside (Matairesinoside)	罗汉松脂酚-4'-O-葡萄糖苷 (罗汉松树脂酚苷)	Lignans and Coumarins	木脂素和香豆素	Lignans	木脂素	23202-85-9	5125800	87305000	11959000	380720	178620	275650	1.3035	0.32014	0.477134	0.00799877	-6.96601	down
pmn001378	UPLC-MS/MS	C26H32O11	Pinoresinol-4-O-glucoside	松脂醇-4-O-葡萄糖苷	Lignans and Coumarins	木脂素和香豆素	Lignans	木脂素	41607-20-9	12689000	8446100	5988700	4354800	3933000	3533700	1.22072	0.119009	0.28422	0.435835	-1.19815	down
pmp001281	UPLC-MS/MS	C26H52NO7P	LysoPC 18:1	溶血磷脂酰胆碱 18:1	Lipids	脂质	LPC	溶血磷脂酰胆碱	-	3727500	3987800	3306900	9899000	9717100	10319000	1.40215	2.08531e-05	0.00744037	2.71589	1.44143	up
pmb3041	UPLC-MS/MS	C23H22O14	Tricin-7-O-saccharic acid	苜蓿素-7-O-葡萄糖二酸苷	Flavonoids	黄酮	Flavones	黄酮	-	1421100	2545100	1688800	306020	530300	207730	1.32687	0.0371511	0.158559	0.184624	-2.43734	down
pmn001710	UPLC-MS/MS	C24H26O13	Rosmarinic acid-3'-O-glucoside	迷迭香酸-3'-O-葡萄糖苷	Phenolic acids	酚酸类	Phenolic acids	酚酸类	910028-78-3	346960	473110	473930	66522	115360	115750	1.35293	0.00847258	0.0844418	0.230009	-2.12024	down
Jmzn003632	UPLC-MS/MS	C26H34O11	Manglieside D	Manglieside D	Lignans and Coumarins	木脂素和香豆素	Lignans	木脂素	-	1543400	2835900	1745600	342370	571860	328360	1.34341	0.0510379	0.187349	0.202875	-2.30134	down
Hmln003754	UPLC-MS/MS	C26H34O11	Icariside E5	淫羊藿次苷 E5	Others	其它类	Others	其它	126176-79-2	304940	4255000	462870	68965	27200	66479	1.1986	0.336331	0.489361	0.0323811	-4.94871	down
Lmmn002274	UPLC-MS/MS	C26H34O11	Isolariciresinol-9'-O-glucoside	异落叶松脂素-9'-O-葡萄糖苷	Lignans and Coumarins	木脂素和香豆素	Lignans	木脂素	63358-12-3	170420	363950	374490	112550	105250	120720	1.23296	0.102579	0.263166	0.372467	-1.42482	down
Lmtn002596	UPLC-MS/MS	C26H34O11	Dihydrodehydrodiconiferyl alcohol-4-O-glucoside	二氢脱氢二松柏醇-4-O-葡萄糖苷	Lignans and Coumarins	木脂素和香豆素	Lignans	木脂素	-	154880	319160	408860	100270	119180	88524	1.20803	0.121334	0.285539	0.348821	-1.51944	down
Jmzn003343	UPLC-MS/MS	C26H34O11	Saikolignanoside A	Saikolignanoside A	Lignans and Coumarins	木脂素和香豆素	Lignans	木脂素	-	12146000	14944000	14554000	3272100	4332000	2749800	1.38345	0.00170774	0.0470293	0.248629	-2.00793	down
HJN083	UPLC-MS/MS	C26H34O11	Lariciresinol-4'-O-glucoside	落叶松脂素-4'-O-葡萄糖苷	Lignans and Coumarins	木脂素和香豆素	Lignans	木脂素	143663-00-7	247360	4568900	566590	53952	25131	42618	1.22198	0.334381	0.488564	0.022609	-5.46696	down
mws0126	UPLC-MS/MS	C26H54NO7P	LysoPC 18:0	溶血磷脂酰胆碱 18:0	Lipids	脂质	LPC	溶血磷脂酰胆碱	19420-57-6	2132400	2237900	2150600	6026300	8690700	6027000	1.37646	0.0331887	0.1526	3.18116	1.66955	up
pmd0136	UPLC-MS/MS	C26H54NO7P	LysoPC 18:0(2n isomer)	溶血磷脂酰胆碱 18:0(2n异构)	Lipids	脂质	LPC	溶血磷脂酰胆碱	-	126410	221430	115580	540970	709080	355730	1.27588	0.0532393	0.189683	3.46506	1.79288	up
Lmhn003801	UPLC-MS/MS	C25H24O13	Feruloylsinapoyltartaric acid	阿魏酰芥子酰酒石酸	Phenolic acids	酚酸类	Phenolic acids	酚酸类	-	67806	51291	237200	2781400	1359300	1190200	1.31213	0.0794836	0.232715	14.962	3.90323	up
Lmbn001181	UPLC-MS/MS	C22H28O15	Fraxetin-7,8-di-O-glucoside	秦皮素-7,8-二-O-葡萄糖苷	Lignans and Coumarins	木脂素和香豆素	Coumarins	香豆素	-	151330	63543	312660	607260	413550	324590	1.03677	0.0708437	0.216784	2.55036	1.3507	up
pmn001375	UPLC-MS/MS	C26H32O12	1-Hydroxypinoresinol-1-O-Glucoside	1-羟基松脂醇-1-O-葡萄糖苷	Lignans and Coumarins	木脂素和香豆素	Lignans	木脂素	81495-71-8	39434	268140	202480	9	9	9	1.39988	0.129562	0.295235	5.29356e-05	-14.2054	down
Hmln002100	UPLC-MS/MS	C26H32O12	Nortrachelogenin-4-O-glucoside	去甲络石苷元-4-O-葡萄糖苷	Lignans and Coumarins	木脂素和香豆素	Lignans	木脂素	33464-78-7	173580	544620	204150	36490	10997	37854	1.2812	0.142818	0.305866	0.0925256	-3.434	down
Lmdn001925	UPLC-MS/MS	C26H34O12	Olivil-4'-O-glucoside	橄榄树脂素-4'-O-葡萄糖苷	Lignans and Coumarins	木脂素和香豆素	Lignans	木脂素	76880-93-8	747510	945220	1355700	102000	67738	120290	1.38016	0.0350788	0.156061	0.0951401	-3.3938	down
pmc0960	UPLC-MS/MS	C28H50NO7P	LysoPC 20:4	溶血磷脂酰胆碱 20:4	Lipids	脂质	LPC	溶血磷脂酰胆碱	-	6921.4	136290	21188	9	9	9	1.3783	0.312764	0.470464	0.000164234	-12.572	down
pmd0146	UPLC-MS/MS	C28H54NO7P	LysoPC 20:2(2n isomer)	溶血磷脂酰胆碱 20:2(2n异构)	Lipids	脂质	LPC	溶血磷脂酰胆碱	-	39645	78034	30433	106360	130680	80107	1.11715	0.0523967	0.189178	2.14126	1.09846	up
pmd0147	UPLC-MS/MS	C28H54NO7P	LysoPC 20:2	溶血磷脂酰胆碱 20:2	Lipids	脂质	LPC	溶血磷脂酰胆碱	-	490650	457180	234340	1453100	1696600	884640	1.26113	0.0468538	0.176551	3.41266	1.7709	up
Lmhp011549	UPLC-MS/MS	C28H56NO7P	LysoPC 20:1	溶血磷脂酰胆碱 20:1	Lipids	脂质	LPC	溶血磷脂酰胆碱	-	19401	11118	16201	62552	58050	58181	1.36989	0.000323591	0.0384857	3.82669	1.9361	up
pmp000589	UPLC-MS/MS	C24H22O15	Quercetin-7-O-(6''-malonyl)glucoside	槲皮素-7-O-(6''-丙二酰)葡萄糖苷	Flavonoids	黄酮	Flavonols	黄酮醇	-	6921600	5441200	1779300	35422000	26957000	22993000	1.28601	0.0128718	0.104855	6.03673	2.59377	up
mws1138	UPLC-MS/MS	C24H26N2O13	Betanin (Betanidin-5-O-glucoside)	甜菜红苷 (甜菜苷-5-O-葡萄糖苷)	Alkaloids	生物碱	Plumerane	吲哚类生物碱	7659-95-2	6799100	4429900	1685300	29403000	22380000	29623000	1.30233	0.0025589	0.0554158	6.30355	2.65617	up
Hmln002355	UPLC-MS/MS	C27H34O12	5'-Methoxymatairesinoside	5'-甲氧基罗汉松脂苷	Lignans and Coumarins	木脂素和香豆素	Lignans	木脂素	1691201-82-7	119220	11050	343630	2443.9	4290.8	11129	1.09407	0.260779	0.427895	0.0376951	-4.72948	down
Lmmn002260	UPLC-MS/MS	C27H36O12	5'-Methoxyisolariciresinol-9'-O-glucoside	5'-甲氧基异落叶松脂醇-9'-O-葡萄糖苷	Lignans and Coumarins	木脂素和香豆素	Lignans	木脂素	-	451510	199980	343360	1065500	719850	858470	1.2503	0.0140235	0.109249	2.65751	1.41007	up
Rfmb25702	UPLC-MS/MS	C28H34O12	Pinoresinol-4-O-(6''-acetyl)glucoside	松脂醇-4-O-(6''-乙酰)葡萄糖苷	Lignans and Coumarins	木脂素和香豆素	Lignans	木脂素	-	169560	215910	208920	1230900	473340	406170	1.18525	0.195832	0.363543	3.55055	1.82804	up
HJAP064	UPLC-MS/MS	C25H24O15	Isorhamnetin-3-O-(6''-malonyl)glucoside	异鼠李素-3-O-(6''-丙二酰)葡萄糖苷	Flavonoids	黄酮	Flavonols	黄酮醇	-	2016600	6409800	4810500	64354000	57498000	47234000	1.35634	0.00624571	0.07334	12.7738	3.67512	up
Zmhp005139	UPLC-MS/MS	C25H24O15	Tamarixetin-3-O-(6''-malonyl)glucoside	柽柳黄素-3-O-(6''-丙二酰)葡萄糖苷	Flavonoids	黄酮	Flavonols	黄酮醇	-	1813800	5947200	5184300	58639000	57824000	46646000	1.35013	0.00303932	0.0589364	12.5999	3.65534	up
Zmjp003463	UPLC-MS/MS	C26H28O14	Vitexin-2''-O-xyloside	牡荆素-2''-O-木糖苷	Flavonoids	黄酮	Flavonoid carbonoside	黄酮碳糖苷	-	31676000	29420000	24997000	6145.8	9	7491.2	1.29696	0.00464118	0.0650452	0.000158503	-12.6232	down
Hmcp001858	UPLC-MS/MS	C26H28O14	Kaempferol-3-O-arabinoside-7-O-rhamnoside	山奈酚-3-O-阿拉伯糖苷-7-O-鼠李糖苷	Flavonoids	黄酮	Flavonols	黄酮醇	-	1301500	1209200	1010300	9	9	9	1.40928	0.00531647	0.0687289	7.66828e-06	-16.9927	down
Lmnp202580	UPLC-MS/MS	C26H28O14	Apigenin-8-C-(2''-xylosyl)glucoside	芹菜素-8-C-(2''-木糖基)葡萄糖苷	Flavonoids	黄酮	Flavonoid carbonoside	黄酮碳糖苷	-	20709000	26595000	15566000	9	9	9	1.40907	0.0223437	0.126143	4.29458e-07	-21.151	down
pmp000411	UPLC-MS/MS	C26H28O14	Genistein-8-C-apiosyl(1→6)glucoside	染料木素-8-C-芹糖基(1→6)葡萄糖苷	Flavonoids	黄酮	Isoflavones	异黄酮	-	3684300	2929200	2924400	9	9	9	1.40932	0.0062487	0.07334	2.83081e-06	-18.4304	down
Lmnp102580	UPLC-MS/MS	C26H28O14	Apigenin-6-C-(2''-xylosyl)glucoside	芹菜素-6-C-(2''-木糖基)葡萄糖苷	Flavonoids	黄酮	Flavonoid carbonoside	黄酮碳糖苷	-	63512000	70261000	54730000	8101.2	4492	4493.8	1.40883	0.00508224	0.0672262	9.06458e-05	-13.4294	down
MWSHY0201	UPLC-MS/MS	C27H30O14	Kaempferol-3,7-O-dirhamnoside (Kaempferitrin)	山奈酚-3,7-O-二鼠李糖苷 (山奈苷)	Flavonoids	黄酮	Flavonols	黄酮醇	482-38-2	1318900	481580	2159000	9	9	9	1.40597	0.11237	0.275292	6.81908e-06	-17.162	down
pme0368	UPLC-MS/MS	C27H30O14	Apigenin-7-O-rutinoside (Isorhoifolin)	芹菜素-7-O-芸香糖苷 (异野漆树苷)	Flavonoids	黄酮	Flavones	黄酮	552-57-8	177500	110510	54465	9	9	9	1.4048	0.08489	0.240886	7.88379e-05	-13.6308	down
HJAP148	UPLC-MS/MS	C26H28O15	Kaempferol-3-O-sambubioside	山奈酚-3-O-桑布双糖苷	Flavonoids	黄酮	Flavonols	黄酮醇	27661-51-4	4938300	2005200	6430600	9	9	9	1.4077	0.0755152	0.224832	2.01883e-06	-18.9181	down
Hmcp001769	UPLC-MS/MS	C26H28O15	Quercetin-3-O-rhamnosyl(1→2)arabinoside	槲皮素-3-O-鼠李糖基(1→2)阿拉伯糖苷	Flavonoids	黄酮	Flavonols	黄酮醇	-	51854000	57233000	36577000	9	9	9	1.40916	0.015851	0.11392	1.85358e-07	-22.3632	down
Lmqn001932	UPLC-MS/MS	C28H36O13	Syringaresinol-4'-O-glucoside	丁香树脂酚-4'-O-葡萄糖苷	Lignans and Coumarins	木脂素和香豆素	Lignans	木脂素	7374-79-0	18892	69890	114970	259400	285590	224490	1.14954	0.00746129	0.0801448	3.77655	1.91707	up
Hmgp003641	UPLC-MS/MS	C28H32O14	Chrysoeriol-6-C-rhamnoside-7-O-rhamnoside	金圣草黄素-6-C-鼠李糖苷-7-O-鼠李糖苷	Flavonoids	黄酮	Flavones	黄酮	-	149800	69605	261240	9	9	9	1.40564	0.102186	0.263166	5.61745e-05	-14.1197	down
Rfmb056	UPLC-MS/MS	C29H36O13	medioresinol-4'-O-(6'''-acetyl)glucoside	杜仲树脂酚-4'-O-(6'''-乙酰)葡萄糖苷	Lignans and Coumarins	木脂素和香豆素	Lignans	木脂素	-	110300	50758	84940	281260	278280	232110	1.31209	0.00153331	0.0469042	3.21812	1.68622	up
Lmdn004868	UPLC-MS/MS	C29H36O13	Jionoside C	焦地黄苯乙醇苷 C	Phenolic acids	酚酸类	Phenolic acids	酚酸类	120406-33-9	82514	65180	19685	9	9	9	1.40076	0.0967059	0.255143	0.000161311	-12.5979	down
pmb2586	UPLC-MS/MS	C30H26O13	Gallocatechin-(4α→8)-catechin	没食子儿茶素-(4α→8)-儿茶素	Flavonoids	黄酮	Flavanols	黄烷醇类	-	34630	75301	71137	9	9	9	1.40785	0.0429022	0.167112	0.000149115	-12.7113	down
Zmcp003989	UPLC-MS/MS	C27H30O15	Kaempferol-3-O-rhamnosyl(1→2)glucoside	山奈酚-3-O-鼠李糖基(1→2)葡萄糖苷	Flavonoids	黄酮	Flavonols	黄酮醇	-	13991000	33386000	21341000	113340	34628	151450	1.38427	0.0563014	0.193157	0.0043572	-7.84238	down
pmp000593	UPLC-MS/MS	C27H30O15	Luteolin-7-O-rutinoside	木犀草素-7-O-芸香糖苷	Flavonoids	黄酮	Flavones	黄酮	3563-98-2	30629000	38683000	19278000	2232900	2570800	2510300	1.38743	0.0405149	0.163157	0.0825601	-3.59841	down
Lmsn002815	UPLC-MS/MS	C27H30O15	Kaempferol-3-O-rutinoside(Nicotiflorin)	山奈酚-3-O-芸香糖苷(烟花苷)	Flavonoids	黄酮	Flavonols	黄酮醇	17650-84-9	13832000	16777000	7089800	325160	573380	447100	1.38303	0.0515998	0.187865	0.0356945	-4.80815	down
MWSslk254	UPLC-MS/MS	C27H30O15	Kaempferol-3-O-glucorhamnoside	山奈酚-3-O-葡萄糖鼠李糖苷	Flavonoids	黄酮	Flavonols	黄酮醇	40437-72-7	3392700	4242700	1463100	203850	215040	202960	1.36482	0.0752595	0.224832	0.0683464	-3.87099	down
pmp001106	UPLC-MS/MS	C27H30O15	Vitexin-2''-O-glucoside	牡荆素-2''-O-葡萄糖苷	Flavonoids	黄酮	Flavonoid carbonoside	黄酮碳糖苷	61360-94-9	3174900	3702400	980680	5422900	6105700	6367200	1.07154	0.0451069	0.172314	2.2774	1.18739	up
Lmsp004247	UPLC-MS/MS	C27H30O15	Isorhamnetin-3-O-arabinoside-7-O-rhamnoside	异鼠李素-3-O-阿拉伯糖苷-7-O-鼠李糖苷	Flavonoids	黄酮	Flavonols	黄酮醇	-	8375600	12775000	18093000	839460	1436300	2108500	1.34117	0.0515944	0.187865	0.111719	-3.16205	down
Lmnp202682	UPLC-MS/MS	C27H30O15	5,7,4'-Trihydroxy-8-methoxyflavone-6-C-[Xylosyl-(1-2)]-glucoside	5,7,4'-三羟基-8-甲氧基黄酮-6-C-[木糖-(1-2)]-葡萄糖苷	Flavonoids	黄酮	Flavonoid carbonoside	黄酮碳糖苷	-	8820400	39035000	18718000	9	9	9	1.40744	0.130015	0.29585	4.05567e-07	-21.2336	down
MWSHY0061	UPLC-MS/MS	C27H30O15	Kaempferol-3-O-neohesperidoside	山奈酚-3-O-新橙皮糖苷	Flavonoids	黄酮	Flavonols	黄酮醇	32602-81-6	54979000	57937000	47456000	9430000	10544000	9449000	1.40432	0.00460357	0.0650452	0.183467	-2.44641	down
Lmnp102682	UPLC-MS/MS	C27H30O15	Hispidulin-8-C-(2''-O-xylosyl)glucoside	高车前素-8-C-(2''-O-木糖基)葡萄糖苷	Flavonoids	黄酮	Flavonoid carbonoside	黄酮碳糖苷	-	6885700	36490000	19562000	9	9	9	1.40686	0.134243	0.299362	4.28996e-07	-21.1525	down
mws1073	UPLC-MS/MS	C27H30O15	Apigenin-6,8-di-C-glucoside (Vicenin-2)	芹菜素-6,8-二-C-葡萄糖苷 (新西兰牡荆苷 II)	Flavonoids	黄酮	Flavonoid carbonoside	黄酮碳糖苷	23666-13-9	15805000	25570000	7497400	34432000	33164000	34817000	1.08919	0.0747074	0.224581	2.09552	1.06731	up
MWSHY0080	UPLC-MS/MS	C27H30O15	Luteolin-7-O-neohesperidoside (Lonicerin)	木犀草素-7-O-新橘皮糖苷 (忍冬苷)	Flavonoids	黄酮	Flavones	黄酮	25694-72-8	51131000	55318000	46131000	8695900	11441000	9268500	1.39928	0.0020929	0.0520087	0.192721	-2.37541	down
Lmsp004670	UPLC-MS/MS	C27H30O15	Kaempferol-3-O-glucoside-7-O-rhamnoside	山奈酚-3-O-葡萄糖苷-7-O-鼠李糖苷	Flavonoids	黄酮	Flavonols	黄酮醇	-	53438000	62355000	48172000	9105300	11762000	8576500	1.39628	0.00607447	0.0722457	0.179574	-2.47735	down
Lmtp004044	UPLC-MS/MS	C26H28O16	Quercetin-3-O-apiosyl(1→2)galactoside	槲皮素-3-O-芹糖基(1→2)半乳糖苷	Flavonoids	黄酮	Flavonols	黄酮醇	-	1129000	707320	1030900	9	9	49130	1.16098	0.0166303	0.11439	0.0171413	-5.86638	down
Lmjp002596	UPLC-MS/MS	C26H28O16	Quercetin-3-O-sambubioside	槲皮素-3-O-桑布双糖苷	Flavonoids	黄酮	Flavonols	黄酮醇	83048-35-5	1004700	657310	924570	78830	106780	48399	1.38141	0.0155675	0.113658	0.0904704	-3.46641	down
Lmmp000897	UPLC-MS/MS	C30H26O14	Gallocatechin-(4α→8)-gallocatechin	没食子儿茶素-(4α→8)-没食子儿茶素	Flavonoids	黄酮	Flavanols	黄烷醇类	-	2765700	5887800	1144800	431320	268190	537620	1.23255	0.176444	0.343268	0.12626	-2.98553	down
pmp000686	UPLC-MS/MS	C28H34O15	Forsythiaside J	连翘酯苷 J	Phenolic acids	酚酸类	Phenolic acids	酚酸类	-	58412	86887	43921	152310	197970	109960	1.21507	0.0515987	0.187865	2.4323	1.28232	up
pmp000241	UPLC-MS/MS	C27H28O17	Luteolin-6-C-(2''-glucuronyl)glucoside	木犀草素-6-C-(2''-葡萄糖醛酸基)葡萄糖苷	Flavonoids	黄酮	Flavones	黄酮	-	9	9	5183.5	10756	41393	20276	1.11288	0.127104	0.292306	13.9239	3.79949	up
Lmzn001664	UPLC-MS/MS	C27H28O17	Kaempferol-3-O-glucuronide-7-O-glucoside	山奈酚-3-O-葡萄糖醛酸苷-7-O-葡萄糖苷	Flavonoids	黄酮	Flavonols	黄酮醇	-	9	9	9	3218200	1410400	5194500	1.408	0.0956595	0.255143	363819	18.4729	up
Lmsp003939	UPLC-MS/MS	C28H32O16	Isorhamnetin-3-O-galactoide-7-O-rhamnoside	异鼠李素-3-O-半乳糖苷-7-O-鼠李糖苷	Flavonoids	黄酮	Flavonols	黄酮醇	-	7779000	35973000	20693000	84506000	89673000	95200000	1.2281	0.00741759	0.0801448	4.17998	2.0635	up
Lmnp002584	UPLC-MS/MS	C28H32O16	Hispidulin-8-C-(2''-O-glucosyl)glucoside	高车前素-8-C-(2''-O-葡萄糖基)葡萄糖苷	Flavonoids	黄酮	Flavonoid carbonoside	黄酮碳糖苷	-	2029300	9894700	5492300	35851000	39588000	43888000	1.28803	0.000475183	0.0418729	6.85146	2.77641	up
Lmsp004045	UPLC-MS/MS	C28H32O16	Isorhamnetin-3-O-glucoside-7-O-rhamnoside	异鼠李素-3-O-葡萄糖苷-7-O-鼠李糖苷	Flavonoids	黄酮	Flavonols	黄酮醇	-	7310700	36499000	20439000	85988000	90469000	99070000	1.2211	0.00604473	0.0722457	4.28844	2.10045	up
Lmmp002963	UPLC-MS/MS	C28H32O16	6-C-Methylquercetin-3-O-rutinoside	6-C-甲基槲皮素-3-O-芸香糖苷	Flavonoids	黄酮	Flavonols	黄酮醇	-	54534	239110	128970	749880	969450	1105300	1.29427	0.00632125	0.0737067	6.68371	2.74065	up
pme1540	UPLC-MS/MS	C28H32O16	Isorhamnetin-3-O-neohesperidoside	异鼠李素-3-O-新橙皮糖苷	Flavonoids	黄酮	Flavonols	黄酮醇	55033-90-4	1863000	7413500	3213600	28323000	29896000	38831000	1.32057	0.00472774	0.0650452	7.77015	2.95794	up
pmp000127	UPLC-MS/MS	C28H32O16	Chrysoeriol-6,8-di-C-glucoside	金圣草黄素-6,8-二-C-葡萄糖苷	Flavonoids	黄酮	Flavonoid carbonoside	黄酮碳糖苷	-	9	9	9	64489	134520	113890	1.40866	0.0374731	0.159551	11588.9	13.5005	up
Zmhn002574	UPLC-MS/MS	C28H32O16	Rhamnazin 3-Glucosyl-Arabinofuranoside	鼠李秦素-3-O-葡萄糖-阿拉伯糖	Flavonoids	黄酮	Flavones	黄酮	-	64511	21085	68196	9	9	9	1.40406	0.0771565	0.228788	0.000175562	-12.4757	down
HJAP026	UPLC-MS/MS	C28H32O16	Chrysoeriol-6-C-glucoside-4'-O-glucoside	金圣草黄素-6-C-葡萄糖苷-4'-O-葡萄糖苷	Flavonoids	黄酮	Flavonoid carbonoside	黄酮碳糖苷	-	2173500	9632900	4081800	34654000	45328000	47960000	1.31262	0.00352038	0.0599359	8.05264	3.00946	up
Lmcn005735	UPLC-MS/MS	C29H36O15	Methylhesperidin	甲基橙皮苷	Flavonoids	黄酮	Flavones	黄酮	11013-97-1	78870	34135	79728	9	9	9	1.40677	0.0507932	0.187221	0.00014009	-12.8014	down
Zmhn000666	UPLC-MS/MS	C29H36O15	Magnoloside A	厚朴苷 A	Phenolic acids	酚酸类	Phenolic acids	酚酸类	113557-95-2	53498	153040	120240	9	9	9	1.40688	0.0653002	0.207657	8.26249e-05	-13.5631	down
pmp001311	UPLC-MS/MS	C27H30O17	6-Hydroxykaempferol-7,6'-O-Diglucoside	6-羟基山奈酚-7,6'-O-二葡萄糖苷	Flavonoids	黄酮	Flavonols	黄酮醇	-	1323800	1992200	448720	19170000	16357000	13402000	1.33763	0.00838759	0.0843356	12.9967	3.70008	up
Zmcp002666	UPLC-MS/MS	C27H30O17	Quercetin-3,7-Di-O-glucoside	槲皮素-3,7-二-O-葡萄糖苷	Flavonoids	黄酮	Flavonols	黄酮醇	-	872760	1474200	296940	12764000	11052000	10943000	1.33577	0.000389148	0.0385689	13.1469	3.71665	up
pmp001310	UPLC-MS/MS	C27H30O17	6-Hydroxykaempferol-3,6-O-Diglucoside	6-羟基山奈酚-3,6-O-二葡萄糖苷	Flavonoids	黄酮	Flavonols	黄酮醇	-	6064000	14930000	4322300	15199000	29319000	17556000	1.08048	0.0935674	0.25196	2.45194	1.29392	up
pmb0645	UPLC-MS/MS	C28H34O16	Hesperetin-6-C-glucoside-7-O-glucoside	橙皮素-6-C-葡萄糖苷-7-O-葡萄糖苷	Flavonoids	黄酮	Flavonoid carbonoside	黄酮碳糖苷	-	106920	354910	49345	738360	1087800	751810	1.20549	0.0104894	0.0924999	5.04322	2.33435	up
pmb0618	UPLC-MS/MS	C28H34O16	Hesperetin-8-C-glucoside-3'-O-glucoside	橙皮素-8-C-葡萄糖苷-3'-O-葡萄糖苷	Flavonoids	黄酮	Flavonoid carbonoside	黄酮碳糖苷	-	226580	319000	114100	1515400	1119700	1627100	1.34121	0.00872656	0.0864899	6.46101	2.69176	up
Hmlp002975	UPLC-MS/MS	C28H30O17	Isorhamnetin-3-O-glucuronide-7-O-rhamnoside	异鼠李素-3-O-葡萄糖醛酸苷-7-O-鼠李糖苷	Flavonoids	黄酮	Flavonols	黄酮醇	-	9	9	7509.8	420510	227920	486100	1.23547	0.0398746	0.162411	150.712	7.23565	up
Lmmp002560	UPLC-MS/MS	C27H28O18	Quercetin-3-O-(2''-O-glucosyl)glucuronide	槲皮素-3-O-(2''-O-葡萄糖基)葡萄糖醛酸苷	Flavonoids	黄酮	Flavonols	黄酮醇	-	9	9	9	928350	181200	472650	1.40374	0.136096	0.300487	58600	15.8386	up
Hmcp001578	UPLC-MS/MS	C28H32O17	Isorhamnetin-3,7-O-diglucoside	异鼠李素-3,7-O-二葡萄糖苷	Flavonoids	黄酮	Flavonols	黄酮醇	6758-51-6	273340	1848100	624540	7015400	3704700	7906000	1.2315	0.0404371	0.163157	6.78304	2.76193	up
Lmsp003252	UPLC-MS/MS	C28H32O17	Isorhamnetin-3-O-sophoroside	异鼠李素-3-O-槐糖苷	Flavonoids	黄酮	Flavonols	黄酮醇	-	858160	5236400	1771000	30838000	20774000	26970000	1.29769	0.00667031	0.0767731	9.99064	3.32058	up
mws1153	UPLC-MS/MS	C31H38O16	2'-Acetylacteoside	2'-乙酰毛蕊花糖苷	Phenolic acids	酚酸类	Phenolic acids	酚酸类	94492-24-7	203320	228780	116650	24451	34926	18252	1.35609	0.0412334	0.163439	0.141465	-2.82148	down
pmp001276	UPLC-MS/MS	C33H56O14	1-Linolenoyl-rac-glycerol-diglucoside	1-亚麻酰单甘油酯-二葡萄糖苷	Lipids	脂质	Free fatty acids	游离脂肪酸	-	746510	911290	582530	1862500	1242900	1720400	1.28095	0.0268396	0.139885	2.15406	1.10706	up
Lmyn005812	UPLC-MS/MS	C33H56O14	Gingerglycolipid A	姜糖脂 A	Lipids	脂质	Glycerol ester	甘油酯	145937-22-0	445340	492340	311410	1393200	985320	1298400	1.34492	0.011821	0.0999461	2.94368	1.55762	up
Lmhp008744	UPLC-MS/MS	C33H56O14	1-α-Linolenoyl-glycerol-2,3-di-O-glucoside	1-α-亚麻酸甘油酯-2,3-二-O-葡萄糖苷	Lipids	脂质	Glycerol ester	甘油酯	-	41993	36646	78439	110350	141750	193750	1.24798	0.0384615	0.161683	2.8384	1.50508	up
Lmyn006011	UPLC-MS/MS	C33H58O14	Gingerglycolipid B	姜糖脂 B	Lipids	脂质	Glycerol ester	甘油酯	88168-90-5	26277	32630	40493	272610	146690	211570	1.36838	0.0381394	0.161481	6.34678	2.66602	up
Lmhp009190	UPLC-MS/MS	C33H58O14	2-Linoleoylglycerol-1,3-di-O-glucoside	2-亚油酰甘油酯-1,3-二-O-葡萄糖苷	Lipids	脂质	Glycerol ester	甘油酯	-	44176	55263	27856	104590	118510	117470	1.3123	0.00369987	0.0599359	2.67544	1.41978	up
Lmhp009384	UPLC-MS/MS	C33H58O14	1-Linoleoylglycerol-2,3-di-O-glucoside	1-亚油酰甘油酯-2,3-二-O-葡萄糖苷	Lipids	脂质	Glycerol ester	甘油酯	-	13639	14286	14132	49629	47519	46418	1.40747	0.000492899	0.0418729	3.41361	1.7713	up
pmn001370	UPLC-MS/MS	C32H42O16	Pinoresinol-4,4'-O-di-O-glucoside	松脂醇-4,4'-O-二-O-葡萄糖苷	Lignans and Coumarins	木脂素和香豆素	Lignans	木脂素	63902-38-5	2326300	1504000	896240	4648600	4008000	3199300	1.20782	0.0157221	0.113724	2.50837	1.32675	up
Hmln001931	UPLC-MS/MS	C32H42O16	Matairesinol-4,4'-di-O-glucoside	罗汉松脂酚-4,4'-di-O-葡萄糖苷	Lignans and Coumarins	木脂素和香豆素	Lignans	木脂素	-	166950	5619500	384450	10270	9932	11873	1.25817	0.369734	0.512513	0.00519778	-7.58789	down
Hmcp001629	UPLC-MS/MS	C30H32O19	Kaempferol-3-O-(6''-Malonyl)glucoside-7-O-Glucoside	山奈酚-3-O-(6''-丙二酰)葡萄糖苷-7-O-葡萄糖苷	Flavonoids	黄酮	Flavonols	黄酮醇	-	121590	139090	51052	14317	20977	17986	1.30643	0.0845176	0.240788	0.170916	-2.54864	down
Hmzn004430	UPLC-MS/MS	C32H40O17	Sesamolinol 4'-O-B-D-Glucosyl (1->6)-O-B-D-Glucoside	芝麻林素酚 4'-O-β-D-葡萄糖基 (1->6)-O-β-D-葡萄糖苷	Lignans and Coumarins	木脂素和香豆素	Lignans	木脂素	-	45413	40146	107440	317120	215570	180710	1.24662	0.0324876	0.151154	3.69639	1.88612	up
pmn001368	UPLC-MS/MS	C32H44O17	Olivil-4,4'-Di-O-glucoside	橄榄树脂素-4,4'-二-O-葡萄糖苷	Lignans and Coumarins	木脂素和香豆素	Lignans	木脂素	-	40512	29020	60427	212310	117230	110080	1.25705	0.0792213	0.232452	3.38276	1.7582	up
Hmcp001947	UPLC-MS/MS	C31H34O19	Isorhamnetin-3-O-(6''-malonyl)glucoside-7-O-rhamnoside	异鼠李素-3-O-(6''-丙二酰)葡萄糖苷-7-O-鼠李糖苷	Flavonoids	黄酮	Flavonols	黄酮醇	-	886090	462590	613060	3121700	3070000	5379200	1.35789	0.0488185	0.182967	5.89828	2.5603	up
pmb0706	UPLC-MS/MS	C30H32O20	Quercetin-3-O-(6''-O-malonyl)glucosyl-5-O-glucoside	槲皮素-3-O-(6''-O-丙二酰)葡萄糖苷-5-O-葡萄糖苷	Flavonoids	黄酮	Flavonols	黄酮醇	-	84770	22148	12580	440900	175830	322760	1.24521	0.0604343	0.200348	7.86197	2.97489	up
Hmcp001658	UPLC-MS/MS	C31H34O20	Isorhamnetin-3-O-(6''-malonyl)glucoside-7-O-glucoside	异鼠李素-3-O-(6''-丙二酰)葡萄糖苷-7-O-葡萄糖苷	Flavonoids	黄酮	Flavonols	黄酮醇	-	147760	188970	174040	2021600	1211200	2276600	1.38967	0.0350463	0.156061	10.7865	3.43115	up
Xmyp004678	UPLC-MS/MS	C32H38O19	Kaempferol-3-O-(2-O-Xylosyl-6-O-Rhamnosyl)Glucoside	山奈酚-3-O-(2''-O-木糖基-6''-O-鼠李糖基)葡萄糖苷	Flavonoids	黄酮	Flavonols	黄酮醇	-	9330900	8508500	4673400	9	9	9	1.40844	0.0346855	0.155085	1.19932e-06	-19.6694	down
Zmlp003063	UPLC-MS/MS	C33H40O19	Luteolin-7-O-(2''-O-rhamnosyl)rutinoside	木犀草素-7-O-(2''-O-鼠李糖基)芸香糖苷	Flavonoids	黄酮	Flavones	黄酮	-	16881000	34497000	9616600	1694900	3627300	1653100	1.29527	0.133955	0.299362	0.114359	-3.12835	down
Lmsp003881	UPLC-MS/MS	C33H40O19	Kaempferol-3-O-rutinoside-7-O-rhamnoside	山奈酚-3-O-芸香糖苷-7-O-鼠李糖苷	Flavonoids	黄酮	Flavonols	黄酮醇	-	8206000	19294000	4039100	800370	1445500	593160	1.28213	0.169968	0.337666	0.0900162	-3.47367	down
Hmdp103165	UPLC-MS/MS	C33H40O19	Clitorin	蝶豆素	Flavonoids	黄酮	Flavones	黄酮	55804-74-5	8397500	9445700	5350300	979590	1605400	820560	1.3602	0.029156	0.145291	0.146832	-2.76776	down
mws1035	UPLC-MS/MS	C33H40O19	Kaempferol-3-O-robinoside-7-O-rhamnoside (Robinin)	山奈酚-3-O-刺槐糖苷-7-O-鼠李糖苷 (刺槐苷)	Flavonoids	黄酮	Flavonols	黄酮醇	301-19-9	15165000	30352000	8962400	1400600	2574900	1320500	1.32335	0.122492	0.286131	0.0972111	-3.36274	down
Hmqp002870	UPLC-MS/MS	C32H38O20	Luteolin-7-O-Sophoroside-5-O-arabinoside	木犀草素-7-O-槐糖苷-5-O-阿拉伯糖苷	Flavonoids	黄酮	Flavones	黄酮	-	93104	11538	125180	9	9	9	1.38923	0.151823	0.316787	0.000117482	-13.0553	down
pmp001105	UPLC-MS/MS	C33H40O20	Kaempferol-3-O-neohesperidoside-7-O-glucoside	山奈酚-3-O-新橙皮糖苷-7-O-葡萄糖苷	Flavonoids	黄酮	Flavonols	黄酮醇	-	134440	262400	122200	30819	11026	34336	1.28595	0.0775792	0.229521	0.146773	-2.76834	down
Zmgp002857	UPLC-MS/MS	C33H40O20	Quercetin-3-O-α-rhamnosyl (1→2)-[α-rhamnosyl (1→6)]-β-glucoside	槲皮素-3-O-α-鼠李糖基(1→2)-[α-鼠李糖基(1→6)]-β-葡萄糖苷	Flavonoids	黄酮	Flavonols	黄酮醇	-	2450200	3597200	421380	6531800	5915400	5106800	1.00075	0.0410644	0.163439	2.71365	1.44023	up
Zmmp003591	UPLC-MS/MS	C33H41O20+	Delphinidin-3-O-(2'''-O-p-coumaroyl)rutinoside	飞燕草素-3-O-(2'''-O-对香豆酰)芸香糖苷	Flavonoids	黄酮	Anthocyanidins	花青素	-	244750	75808	497100	9	9	9	1.40188	0.155883	0.321729	3.30211e-05	-14.8863	down
pmn001505	UPLC-MS/MS	C41H64O13	Oleanolic acid-3-O-xylosyl(1→3)glucuronide	齐墩果酸-3-O-木糖基(1→3)葡萄糖醛酸苷	Terpenoids	萜类	Triterpene Saponin	三萜皂苷	-	9781200	5811100	14175000	9	9	9	1.40881	0.0544651	0.191648	9.07036e-07	-20.0723	down
Zmcn007922	UPLC-MS/MS	C41H64O13	Tarasaponin VI	龙牙楤木皂苷VI	Terpenoids	萜类	Triterpene Saponin	三萜皂苷	59252-95-8	4482.4	2904.5	2123.3	9	9	9	1.4047	0.0449542	0.172314	0.00283906	-8.46037	down
HJAP119	UPLC-MS/MS	C34H42O20	Rhamnetin-3-O-Rutinoside-5-O-rhamnoside	鼠李素-3-O-芸香糖苷-5-O-鼠李糖苷	Flavonoids	黄酮	Flavonols	黄酮醇	-	1304500	7660500	1821300	18842000	31885000	26683000	1.26187	0.0133654	0.105973	7.1767	2.84332	up
pmb0592	UPLC-MS/MS	C34H42O20	Chrysoeriol-7-O-rutinoside-5-O-glucoside	金圣草黄素-7-O-芸香糖苷-5-O-葡萄糖苷	Flavonoids	黄酮	Flavones	黄酮	-	2848500	9059200	3247000	24654000	27004000	27650000	1.30544	0.00312951	0.0593941	5.23323	2.3877	up
MWSHY0122	UPLC-MS/MS	C34H42O20	Typhaneoside	香蒲新苷	Flavonoids	黄酮	Flavones	黄酮	104472-68-6	1727600	8794800	2368800	21475000	33622000	25770000	1.2634	0.00915137	0.0889832	6.27304	2.64916	up
Zmqp002952	UPLC-MS/MS	C33H41O21+	Delphinidin-3-O-rutinoside-7-O-glucoside	飞燕草素-3-O-芸香糖苷-7-O-葡萄糖苷	Flavonoids	黄酮	Anthocyanidins	花青素	-	14968	7226.1	5770.5	55239	35965	94277	1.30797	0.0883933	0.245559	6.63271	2.7296	up
HJN098	UPLC-MS/MS	C42H68O13	Azukisaponin I	赤豆皂苷 I	Terpenoids	萜类	Triterpene Saponin	三萜皂苷	82793-02-0	4490000	15474000	18045000	9	9	9	1.40749	0.0928823	0.251445	7.10358e-07	-20.425	down
Hmmp006067	UPLC-MS/MS	C42H68O13	Oleanolic acid-3-O-glucosyl(1→2)glucoside	齐墩果酸-3-O-葡萄糖基(1→2)葡萄糖苷	Terpenoids	萜类	Triterpene Saponin	三萜皂苷	-	664350	270100	1684100	78389	49666	36193	1.29288	0.191545	0.357407	0.0627248	-3.99482	down
Hmcp001589	UPLC-MS/MS	C34H42O21	Isorhamnetin-3-O-rutinoside-4'-O-glucoside	异鼠李素-3-O-芸香糖苷-4'-O-葡萄糖苷	Flavonoids	黄酮	Flavonols	黄酮醇	111393-97-6	78636	238750	128120	1229500	822080	873900	1.3268	0.014386	0.110624	6.56665	2.71516	up
Lmhp003162	UPLC-MS/MS	C34H42O21	Chrysoeriol-6,8-di-C-glucoside-4'-O-glucoside	金圣草黄素-6,8-二-C-葡萄糖苷-4'-O-葡萄糖苷	Flavonoids	黄酮	Flavonoid carbonoside	黄酮碳糖苷	-	19623	42241	18801	243290	166880	281190	1.36041	0.0217148	0.126143	8.57076	3.09942	up
pmb0620	UPLC-MS/MS	C34H42O21	Chrysoeriol-6,8-di-C-glucoside-7-O-glucoside	金圣草黄素-6,8-二-C-葡萄糖苷-7-O-葡萄糖苷	Flavonoids	黄酮	Flavones	黄酮	-	14946	41999	20362	275600	146510	239160	1.33928	0.0320508	0.151154	8.55382	3.09657	up
Lmsp003790	UPLC-MS/MS	C34H42O21	Isorhamnetin-3-O-sophoroside-7-O-rhamnoside	异鼠李素-3-O-槐糖苷-7-O-鼠李糖苷	Flavonoids	黄酮	Flavonols	黄酮醇	41328-75-0	136090	223520	244980	2469900	2949900	1888200	1.38369	0.0174213	0.115537	12.0875	3.59545	up
mws1150	UPLC-MS/MS	C35H46O20	Echinacoside	松果菊苷	Phenolic acids	酚酸类	Phenolic acids	酚酸类	82854-37-3	17991	35820	65884	129820	200990	78160	1.1315	0.0989604	0.258864	3.41677	1.77263	up
Cmdn004237	UPLC-MS/MS	C35H46O20	Betonyoside E	Betonyoside E	Phenolic acids	酚酸类	Phenolic acids	酚酸类	181301-30-4	21058	52955	114920	447120	464050	241910	1.23144	0.03289	0.15201	6.10312	2.60955	up
Zmcp102720	UPLC-MS/MS	C47H76O17	Bupleurumwenchuanense	2''-O-β-D-吡喃木糖基-柴胡皂苷b2	Terpenoids	萜类	Triterpene Saponin	三萜皂苷	-	36010	110220	38987	9	9	9	1.40471	0.125893	0.290923	0.000145775	-12.744	down
Zmcp102719	UPLC-MS/MS	C47H76O17	saikosaponin K	柴胡皂苷K	Terpenoids	萜类	Triterpene Saponin	三萜皂苷	-	61942	148830	48368	9	9	9	1.40528	0.111072	0.275141	0.000104191	-13.2285	down
Zmcp102716	UPLC-MS/MS	C47H76O17	Rotundifolioside A	圆叶柴胡果苷A	Terpenoids	萜类	Triterpene Saponin	三萜皂苷	-	58208	147080	49500	9	9	9	1.40538	0.112493	0.275292	0.00010597	-13.2041	down
Zmcp102715	UPLC-MS/MS	C47H76O17	Rotundifolioside H	圆叶柴胡果苷H	Terpenoids	萜类	Triterpene Saponin	三萜皂苷	-	79504	152380	70845	9	9	9	1.40754	0.0598335	0.19952	8.91887e-05	-13.4528	down
Hmmp005664	UPLC-MS/MS	C47H76O17	Akeboside Stf	木通皂苷 Stf	Terpenoids	萜类	Triterpene Saponin	三萜皂苷	-	1554.4	5304	12216	9	9	9	1.38676	0.179044	0.346436	0.00141551	-9.46446	down
Lmsp004090	UPLC-MS/MS	C43H48O23	Isorhamnetin-3-O-(6''-O-p-coumarol)sophoroside-7-O-rhamnoside	异鼠李素-3-O-(6''-O-对香豆酰)槐糖苷-7-O-鼠李糖苷	Flavonoids	黄酮	Flavonols	黄酮醇	-	19552	23905	15900	1165800	2150300	400040	1.36033	0.137872	0.302166	62.6066	5.96824	up
Lmmn005092	UPLC-MS/MS	C47H72O20	Medicagenic acid-3-O-glucuronide-28-O-rhamnosyl(1,2)-arabinoside	苜蓿酸-3-O-葡萄糖醛酸苷-28-O-鼠李糖基(1,2)-阿拉伯糖苷	Terpenoids	萜类	Triterpene Saponin	三萜皂苷	-	234540	99655	414770	9	9	9	1.40531	0.111726	0.275141	3.60497e-05	-14.7597	down
XMW0636	GC-MS	C10H21I	1-iodo-Decane	1-碘-癸烷	Others	其它类	-	-	2050-77-3	2935.96	5288.38	4165.74	10539.9	20373.5	9585.06	1.25175	0.107843	0.270594	3.26861	1.70868	up
KMW0713	GC-MS	C17H28O2	2,6,10-Dodecatrien-1-ol, 3,7,11-trimethyl-, acetate, (E,E)-	（E，E）-醋酸法呢酯	Ester	酯	-	-	4128-17-0	76259.4	63285.7	138782	9	9	9	1.40821	0.0577082	0.196848	9.70082e-05	-13.3315	down
w14	GC-MS	C16H34O	Octane, 1,1'-oxybis-	1,1'-氧双-辛烷	Hydrocarbons	烃类	-	-	629-82-3	66324	58035	146422	41679.2	31956.7	40694.4	1.12171	0.204248	0.372709	0.422224	-1.24392	down
XMW0265	GC-MS	C17H36	Tetradecane, 2,6,10-trimethyl-	2,6,10-三甲基十四烷	Hydrocarbons	烃类	-	-	14905-56-7	110466	329509	128840	38046.5	28802.8	27478.4	1.30062	0.152571	0.317975	0.165832	-2.59221	down
D130	GC-MS	C16H16O2	Benzeneacetic acid, 2-phenylethyl ester	苯乙酸2-苯乙基酯	Ester	酯	-	-	102-20-5	9	3048.36	9	10088	45296	26378	1.17051	0.121823	0.285588	26.6642	4.73683	up
KMW0638	GC-MS	C15H26O2	Geranyl isovalerate	异戊酸香叶基酯	Ester	酯	-	-	109-20-6	897103	567122	1.01975e+06	1.63255e+06	2.24529e+06	2.42736e+06	1.28703	0.0171592	0.114651	2.53835	1.34389	up
NMW0280	GC-MS	C15H26O2	2-Furanmethanol, tetrahydro-.alpha.,.alpha.,5-trimethyl-5-(4-methyl-3-cyclohexen-1-yl)-, [2S-[2.alpha.,5.beta.(R*)]]-	[2S-[2α，5bR*）]]-四氢-α，α，5-三甲基-5-（4-甲基-3-环己烯-1-基）-2-呋喃甲醇	Terpenoids	萜类	-	-	26184-88-3	67413.2	98874	129310	38673.7	31739.6	33435.5	1.31907	0.0681578	0.211843	0.351318	-1.50915	down
XMW1184	GC-MS	C15H20O2	Butanoic acid, 3-methyl-, 8-decene-4,6-diynyl ester, (Z)-	（Z）-8-癸烯-4,6-二炔-1-基3-甲基丁酸酯	Ester	酯	-	-	126693-81-0	20163	22807	55052.3	14316	9875	15361	1.08268	0.222422	0.393698	0.4035	-1.30936	down
D347	GC-MS	C14H28O2	n-Capric acid isobutyl ester	正癸酸异丁酯	Ester	酯	-	-	30673-38-2	84857.7	181173	96053.7	28158.8	20901	23003.9	1.3438	0.0856053	0.241523	0.199025	-2.32898	down
XMW0259	GC-MS	C16H34	Pentadecane, 2-methyl-	2-甲基-十五烷	Hydrocarbons	烃类	-	-	1560-93-6	45620.4	266951	63055.5	28438.3	29249	30041.4	1.02134	0.309319	0.468044	0.233553	-2.09818	down
KMW0558	GC-MS	C14H24O2	1,5-Dimethyl-1-vinyl-4-hexenyl butyrate	丁酸芳基酯	Ester	酯	-	-	78-36-4	1.81251e+07	1.24331e+08	2.8277e+07	1.36736e+07	1.03864e+07	1.04261e+07	1.03048	0.311561	0.470128	0.201988	-2.30766	down
XMW0842	GC-MS	C15H26O	Palustrol (Ledum)	喇叭茶醇	Terpenoids	萜类	-	-	5986-49-2	244773	146371	225209	71615.6	49217.2	66387.7	1.33696	0.0360399	0.156245	0.303756	-1.71902	down
XMW0558	GC-MS	C15H26O	1,4-Methanoazulen-9-ol, decahydro-1,5,5,8a-tetramethyl-, [1R-(1.alpha.,3a.beta.,4.alpha.,8a.beta.,9S*)]-	[1R-（1α，3aβ，4α，8aβ，9S *） ]-十氢-1,5,5,8a-四甲基-1,4-甲烷七氮烯-9-醇	Terpenoids	萜类	-	-	465-24-7	68912	58255	62451	32706	28364	27479	1.38704	0.00233238	0.0540386	0.466986	-1.09855	down
WMW0075	GC-MS	C15H26O	1,6,10-Dodecatrien-3-ol, 3,7,11-trimethyl-	3,7,11-三甲基-1,6,10-十二碳三烯-3-醇	Terpenoids	萜类	-	-	7212-44-4	167417	1.2112e+06	185303	90267.3	86206.5	86079.3	1.01741	0.335536	0.48905	0.167882	-2.57448	down
XMW0027	GC-MS	C15H26O	Ledol	勒多尔	Terpenoids	萜类	-	-	577-27-5	8.08679e+06	4.75288e+06	7.61331e+06	2.3693e+06	1.79988e+06	2.08929e+06	1.34343	0.0422286	0.165755	0.305993	-1.70843	down
XMW0854	GC-MS	C15H26O	4a(2H)-Naphthalenol, 1,3,4,5,6,8a-hexahydro-4,7-dimethyl-1-(1-methylethyl)-, (1S,4S,4aS,8aR)-	（1S，4S，4aS，8aR）-1,3,4,5,6,8a-六氢-4,7-二甲基-1-（1-甲基乙基）-4a（2H）-萘	Terpenoids	萜类	-	-	73365-77-2	1.23744e+06	1.00488e+06	1.47341e+06	1.76193e+06	3.77174e+06	5.47127e+06	1.16408	0.149579	0.313719	2.96172	1.56644	up
XMW0705	GC-MS	C15H26O	2-Naphthalenemethanol, 1,2,3,4,4a,5,6,8a-octahydro-.alpha.,.alpha.,4a,8-tetramethyl-, [2R-(2.alpha.,4a.alpha.,8a.beta.)]-	[2R-（2α，4a ，8aβ]]-1,2,3,4,4a，5,6,8a-八氢-α，α，4a，8-四甲基-2-萘甲醇	Terpenoids	萜类	-	-	473-16-5	26028.2	29810.8	53812.1	14133	14023.5	13347.4	1.27402	0.120574	0.285514	0.378509	-1.4016	down
XMW1167	GC-MS	C15H24O	(1R,3E,7E,11R)-1,5,5,8-Tetramethyl-12-oxabicyclo[9.1.0]dodeca-3,7-diene	（1R，3E，7E，11R）-1,5,5,8-四甲基-12-氧杂双环[9.1.0]十二烷基-3,7-二烯	Terpenoids	萜类	-	-	19888-34-7	827981	540007	1.13592e+06	1.49386e+06	1.53576e+06	2.05854e+06	1.18923	0.0263455	0.138237	2.03208	1.02296	up
XMW1180	GC-MS	C15H24O	(1R,1aR,2aS,5R,6R,6aS,7aS)-1,6,6a-trimethyldecahydro-1,2a-methanocyclopropa[b]naphthalen-5-ol	（1R，1aR，2aS，5R，6R，6aS，7aS）-1,6,6a-三甲基十氢-1,2-a-甲基环丙烷[b]萘-5-醇	Terpenoids	萜类	-	-	860769-47-7	23818.2	72906.8	67544.4	25130.5	6710.77	7827	1.14632	0.102039	0.263166	0.241483	-2.05001	down
w05	GC-MS	C15H24O	2,6,10-Dodecatrienal, 3,7,11-trimethyl-	3,7,11-三甲基-2,6,10-十二烷基	Terpenoids	萜类	-	-	19317-11-4	272292	193468	521464	117167	214551	117685	1.02909	0.20453	0.372709	0.45522	-1.13536	down
D254	GC-MS	C15H24O	2H-2,4a-Methanonaphthalen-8(5H)-one, 1,3,4,6,7,8a-hexahydro-1,1,5,5-tetramethyl-	1，1,3,4,6,7,8a-六氢-1,1,5,5-四甲基-2H-2,4a-甲烷萘-8（5H）酮	Terpenoids	萜类	-	-	23787-90-8	570939	289534	724708	690419	1.27906e+06	1.79123e+06	1.05209	0.137377	0.301823	2.37241	1.24636	up
XMW0479	GC-MS	C13H16O3	cis-3-Hexenyl salicylate	顺-3-己烯基水杨酸酯	Ester	酯	-	-	65405-77-8	2.33578e+06	4.11444e+06	5.46631e+06	1.21358e+06	1.15335e+06	1.64847e+06	1.24833	0.0968227	0.255143	0.336961	-1.56935	down
XMW1000	GC-MS	C15H22O	(E)-5-((1R,3R,6S)-2,3-Dimethyltricyclo[2.2.1.02,6]heptan-3-yl)-2-methylpent-2-enal	（E）-5-（（（1R，3R，6S）-2,3-二甲基三环[2.2.1.02,6]庚基-3-基）-2-甲基-戊-2-烯	Terpenoids	萜类	-	-	19903-70-9	2.90476e+06	4392499	8.49891e+06	2158399	1941937	2825150	1.05094	0.216924	0.388943	0.438428	-1.18959	down
XMW0617	GC-MS	C12H24O3	Propanoic acid, 2-methyl-, 3-hydroxy-2,2,4-trimethylpentyl ester	2,2,4-三甲基戊烷-1,3-二醇单异丁酸酯	Ester	酯	-	-	77-68-9	17824.6	341633	17358.6	7078.39	5390.88	6600.48	1.003	0.384647	0.518677	0.0506075	-4.3045	down
w44	GC-MS	C11H20O4	Butanoic acid, 2-butoxy-1-methyl-2-oxoethyl ester	丁酸2-丁氧基-1-甲基-2-氧乙酯	Ester	酯	-	-	7492-70-8	35148.7	11614.9	23349.3	207513	414386	269980	1.35405	0.0450267	0.172314	12.7206	3.6691	up
XMW0419	GC-MS	C15H32	Tetradecane, 2-methyl-	二甲基十六烷	Hydrocarbons	烃类	-	-	1560-95-8	383517	223440	464206	195372	121397	132235	1.20341	0.0875149	0.245482	0.419175	-1.25438	down
XMW0200	GC-MS	C15H32	Tetradecane, 4-methyl-	四甲基十四烷	Hydrocarbons	烃类	-	-	25117-24-2	370104	211368	444727	186571	124228	126098	1.19932	0.0936378	0.25196	0.425744	-1.23194	down
WMW0130	GC-MS	C15H30	1-Pentadecene	1-十五碳烯	Hydrocarbons	烃类	-	-	13360-61-7	524619	495719	538833	265710	170931	243925	1.34031	0.00364129	0.0599359	0.436492	-1.19597	down
XMW1336	GC-MS	C11H13NO3	N-Benzyloxy-2-carbomethoxyaziridine	1-苯基甲氧基氮丙啶-2-羧酸甲酯	Ester	酯	-	-	53084-33-6	1.26563e+07	2.79374e+07	1.37567e+07	7.05859e+06	4.24999e+06	5.81397e+06	1.24868	0.12418	0.289591	0.31504	-1.66639	down
XMW0195	GC-MS	C15H26	1H-Cycloprop[e]azulene, decahydro-1,1,4,7-tetramethyl-, [1aR-(1a.alpha.,4.beta.,4a.beta.,7.beta.,7a.beta.,7b.alpha.)]-	十氢-1,1,4,7-四甲基-1H-环丙烯腈	Terpenoids	萜类	-	-	28580-43-0	218646	4.40201e+06	242537	96205.8	53276.7	61140.2	1.04522	0.38075	0.516604	0.0433096	-4.52917	down
XMW1016	GC-MS	C13H18O2	(4,4-Dimethyl-2,4,5,6-tetrahydro-1H-inden-2-yl)acetic Acid	（4,4-二甲基-2,4,5,6-四氢-1H-茚满-2-基）乙酸	Acid	酸	-	-	113522-67-1	339008	314319	1.29531e+06	135861	177012	187371	1.09151	0.273404	0.439022	0.256714	-1.96177	down
XMW1153	GC-MS	C15H24	1R,4R,7R,11R-1,3,4,7-Tetramethyltricyclo[5.3.1.0(4,11)]undec-2-ene	1R，4R，7R，11R-1,3,4,7-四甲基三环[5.3.1.0（4,11）]十一烷基-2-烯	Terpenoids	萜类	-	-	137235-59-7	1.48429e+06	3.63321e+06	2.44582e+06	1.00689e+06	898930	800060	1.23983	0.119833	0.285043	0.357764	-1.48292	down
XMW0197	GC-MS	C15H24	(1S,4S,4aS)-1-Isopropyl-4,7-dimethyl-1,2,3,4,4a,5-hexahydronaphthalene	（1S，4S，4aS）-1-异丙基-4,7-二甲基-1,2,3,4,4a，5-六氢萘	Terpenoids	萜类	-	-	267665-20-3	5.84954e+07	3.40799e+07	7.1975e+07	2.85321e+07	1.7515e+07	2.17155e+07	1.20622	0.0907469	0.248301	0.411805	-1.27997	down
KMW0559	GC-MS	C15H24	Bicyclo[7.2.0]undec-4-ene, 4,11,11-trimethyl-8-methylene-,[1R-(1R*,4Z,9S*)]-	异烟碱	Terpenoids	萜类	-	-	118-65-0	2.08454e+06	6.63291e+06	2.99054e+06	2.19123e+06	1.25723e+06	1.52215e+06	1.00559	0.244874	0.415085	0.424549	-1.236	down
KMW0582	GC-MS	C15H24	.beta.-Guaiene	β-番石榴烯	Terpenoids	萜类	-	-	88-84-6	4.1928e+07	2.45934e+07	4.14117e+07	1.69528e+07	1.15621e+07	1.3985e+07	1.2855	0.0532428	0.189683	0.393761	-1.34461	down
XMW0382	GC-MS	C15H24	isoledene	（-)-异喇叭烯	Terpenoids	萜类	-	-	95910-36-4	5.78744e+06	1.23802e+08	6.33544e+06	2.19494e+06	1.39369e+06	1.59356e+06	1.05306	0.382435	0.516604	0.0381253	-4.71311	down
KMW0623	GC-MS	C15H24	1,5-Cyclodecadiene, 1,5-dimethyl-8-(1-methylethylidene)-, (E,E)-	大根香叶烯B	Terpenoids	萜类	-	-	15423-57-1	287771	374628	388640	97604.7	209765	106945	1.2509	0.0117781	0.0999461	0.394196	-1.34301	down
KMW0548	GC-MS	C15H24	[1aR-(1a.alpha.,4.alpha.,4a.beta.,7b.alpha.)]-1a,2,3,4,4a,5,6,7b-octahydro-1,1,4,7-tetramethyl-1H-Cycloprop[e]azulene	(-)-alpha-古芸烯	Terpenoids	萜类	-	-	489-40-7	1.38351e+07	5.47582e+07	2.10752e+07	1.40121e+07	7.57136e+06	9.03382e+06	1.02656	0.257316	0.424779	0.341449	-1.55026	down
KMW0509	GC-MS	C15H24	Cyclohexene, 4-ethenyl-4-methyl-3-(1-methylethenyl)-1-(1-methylethyl)-, (3R-trans)-	δ-榄香烯	Terpenoids	萜类	-	-	20307-84-0	130850	54708.7	134155	429379	479583	517833	1.31791	0.000536795	0.0419233	4.46272	2.15792	up
WMW0008	GC-MS	C15H24	Longifolene	长叶烯	Terpenoids	萜类	-	-	475-20-7	6.89458e+07	2.33909e+08	1.00495e+08	6.99673e+07	3.84673e+07	4.58903e+07	1.03382	0.2398	0.410687	0.382608	-1.38606	down
XMW0388	GC-MS	C15H24	(4aR,8aR)-5,8a-dimethyl-3-propan-2-ylidene-1,2,4,4a,7,8-hexahydronaphthalene	（4aR，8aR）-5,8a-二甲基-3-丙烷-2-亚烷基-1,2,4,4a，7,8-六氢萘	Terpenoids	萜类	-	-	6813-21-4	4.41603e+07	5.37229e+07	4.71953e+07	1.40548e+07	1.01132e+07	1.18166e+07	1.39346	0.00227366	0.0540142	0.248035	-2.01138	down
XMW1408	GC-MS	C15H24	1H-Cyclopropa[a]naphthalene, 1a,2,3,3a,4,5,6,7b-octahydro-1,1,3a,7-tetramethyl-, [1aR-(1a.alpha.,3a.alpha.,7b.alpha.)]-	[1aR-（1aα。，3a。 ，7b.α。）]-1a，2,3,3a，4,5,6,7b-八氢-1,1,3a，7-四甲基-1H-环丙烷[a]萘	Terpenoids	萜类	-	-	489-29-2	4.64409e+06	1.52583e+07	6.56225e+06	4.02348e+06	2.10656e+06	2.68478e+06	1.1072	0.210687	0.380816	0.333079	-1.58606	down
D341	GC-MS	C15H24	Naphthalene, decahydro-1,6-bis(methylene)-4-(1-methylethyl)-, (4.alpha.,4a.alpha.,8a.alpha.)-	十氢-1,6-双（亚甲基）-4-（1-甲基乙基）-，（4α，4aα，8aα）-萘	Terpenoids	萜类	-	-	30021-46-6	5.15692e+06	2.9813e+06	6.32157e+06	2.53749e+06	1.54042e+06	1.78702e+06	1.20764	0.0888056	0.245559	0.405603	-1.30186	down
XMW0629	GC-MS	C15H24	3H-3a,7-Methanoazulene, 2,4,5,6,7,8-hexahydro-1,4,9,9-tetramethyl-, [3aR-(3a.alpha.,4.beta.,7.alpha.)]-	莎草烯	Terpenoids	萜类	-	-	2387-78-2	1.29345e+07	4.83729e+07	1.96474e+07	1.37258e+07	7.31003e+06	8.76944e+06	1.01132	0.255219	0.423506	0.368171	-1.44155	down
XMW0948	GC-MS	C15H24	Valerena-4,7(11)-diene	（4S，7R，7aR）-2,4,5,6,7,7a-六氢-3,7-二甲基-4-（2-甲基-1-丙烯-1-基）-1H-茚	Terpenoids	萜类	-	-	351222-66-7	1.63221e+07	9.62184e+06	1.99919e+07	7.97921e+06	4.86016e+06	5.64018e+06	1.21857	0.0837072	0.239132	0.402291	-1.31369	down
WMW0004	GC-MS	C15H24	Ylangene	衣兰烯	Terpenoids	萜类	-	-	14912-44-8	5.96719e+06	1.24323e+08	6.5603e+06	2.30218e+06	1.46558e+06	1.67059e+06	1.05228	0.381517	0.516604	0.0397394	-4.65329	down
XMW0131	GC-MS	C15H24	Di-epi-.alpha.-cedrene	双表-α-雪松烯	Terpenoids	萜类	-	-	50894-66-1	5.60615e+07	1.86489e+08	8.11143e+07	5.72348e+07	3.15625e+07	3.75255e+07	1.03144	0.238812	0.409655	0.390289	-1.35739	down
KMW0596	GC-MS	C15H24	Alloaromadendrene	阿古玛烯	Terpenoids	萜类	-	-	25246-27-9	1.20878e+07	6.77057e+06	1.1943e+07	5.17348e+06	3.44024e+06	3.58979e+06	1.26149	0.0599754	0.19962	0.396201	-1.3357	down
XMW0033	GC-MS	C15H24	(1R,3aS,4aS,8aS)-1,4,4,6-Tetramethyl-1,2,3,3a,4,4a,7,8-octahydrocyclopenta[1,4]cyclobuta[1,2]benzene	（1R，3aS，4aS，8aS）-1,4,4,6-四甲基-1,2,3,3a，4,4a，7,8-八氢环戊[1,4]环丁[1,2]苯	Terpenoids	萜类	-	-	94535-52-1	5.67925e+07	1.94367e+08	8.20632e+07	5.756e+07	3.17116e+07	3.77627e+07	1.03063	0.243176	0.413562	0.38123	-1.39127	down
KMW0537	GC-MS	C15H24	Cyclohexane, 1-ethenyl-1-methyl-2,4-bis(1-methylethenyl)-, (1.alpha.,2.beta.,4.beta.)-	β-榄香烯	Terpenoids	萜类	-	-	33880-83-0	9.22845e+06	3.1132e+07	1.32695e+07	9.41863e+06	5.23863e+06	6.31115e+06	1.02352	0.244729	0.415085	0.390984	-1.35482	down
XMW0841	GC-MS	C13H16O2	1-Penten-3-one, 1-(4-methoxyphenyl)-4-methyl-	1-（4-甲氧基苯基）-4-甲基-1-戊烯-3-酮	Ketone	酮	-	-	103-13-9	4.47145e+06	3.25476e+07	4.43588e+06	1.18893e+06	928554	996946	1.19392	0.305593	0.465606	0.0751281	-3.7345	down
XMW0992	GC-MS	C15H22	(2R,8R,8aS)-8,8a-Dimethyl-2-(prop-1-en-2-yl)-1,2,3,7,8,8a-hexahydronaphthalene	（2R，8R，8aS）-8,8a-二甲基-2-（丙-1-烯-2-基）-1,2,3,7,8,8a-六氢萘	Terpenoids	萜类	-	-	5090-61-9	1.0699e+07	5.96677e+06	1.30108e+07	5.07097e+06	3.25208e+06	4.34513e+06	1.1812	0.103772	0.265229	0.426875	-1.22812	down
KMW0542	GC-MS	C12H24O2	Decanoic acid, ethyl ester	癸酸乙酯	Ester	酯	-	-	110-38-3	16721.4	62679.4	24539.1	17313.1	9690.88	11186.7	1.01023	0.260958	0.427895	0.367431	-1.44446	down
KMW0704	GC-MS	C15H20	.alpha.-Calacorene	Α-二去氢菖蒲烯	Terpenoids	萜类	-	-	21391-99-1	46800.1	59314	54780	18440.1	13409.7	16092.1	1.38628	0.00417477	0.0625369	0.297971	-1.74675	down
XMW0136	GC-MS	C15H20	4-Isopropyl-6-methyl-1-methylene-1,2,3,4-tetrahydronaphthalene	4-异丙基-6-甲基-1-亚甲基-1,2,3,4-四氢萘	Terpenoids	萜类	-	-	50277-34-4	1.66557e+06	3.0209e+06	2.24629e+06	759144	638483	731275	1.34724	0.0540364	0.190516	0.307079	-1.70332	down
XMW0155	GC-MS	C13H13NO	5-Phenyl-o-anisidine	5-苯基邻茴香胺	Amine	胺	-	-	39811-17-1	13062.4	13120.3	39637.1	81341	29578.5	61551.4	1.02671	0.128357	0.293953	2.62035	1.38976	up
KMW0551	GC-MS	C14H30	Tetradecane	十四烷	Hydrocarbons	烃类	-	-	629-59-4	323093	966507	467424	335129	192837	229237	1.02965	0.225881	0.397408	0.430957	-1.21438	down
XMW0422	GC-MS	C14H30	3,5-Dimethyldodecane	3,5-二甲基十二烷	Hydrocarbons	烃类	-	-	107770-99-0	33989	32623.6	66780.2	206473	121665	280016	1.29014	0.066964	0.210324	4.55912	2.18876	up
w10	GC-MS	C13H26O	2-Undecanone, 6,10-dimethyl-	6,10-二甲基-2-十一烷酮	Ketone	酮	-	-	1604-34-8	71174.3	216882	99257.5	72317.8	40257.7	47328	1.03786	0.228055	0.399394	0.412852	-1.2763	down
w45	GC-MS	C14H28	2-Tetradecene, (E)-	（E）-2-十四碳烯	Hydrocarbons	烃类	-	-	35953-54-9	2.2969e+06	7.18678e+06	3.28498e+06	2.36587e+06	1.35285e+06	1.6077e+06	1.02465	0.235482	0.406286	0.417147	-1.26137	down
NMW0142	GC-MS	C12H20O2	Cyclohexanol, 1-methyl-4-(1-methylethylidene)-, acetate	1-甲基-4-（1-甲基亚乙基）-环己醇乙酸酯	Ester	酯	-	-	10235-63-9	9	9	9	227329	142072	240810	1.4091	0.0223269	0.126143	22600.4	14.4641	up
KMW0501	GC-MS	C12H20O2	Dihydrocarvyl acetate	乙酸二氢戊酯	Ester	酯	-	-	20777-49-5	97336	9	9	102209	903429	202228	1.06582	0.278762	0.441663	12.4069	3.63308	up
XMW0961	GC-MS	C12H20O2	Bornyl acetate	乙酸龙脑酯	Ester	酯	-	-	76-49-3	299321	211661	429135	1.25479e+06	689230	1.49342e+06	1.27142	0.0646872	0.206443	3.6564	1.87042	up
WMW0219	GC-MS	C12H20O2	Isobornyl acetate	乙酸异冰片酯	Ester	酯	-	-	125-12-2	275192	167287	405989	1.03179e+06	634918	1.43844e+06	1.24608	0.0730188	0.22154	3.65971	1.87173	up
WMW0175	GC-MS	C12H20O2	.delta.-Terpineol, acetate	δ-松油醇，醋酸盐	Terpenoids	萜类	-	-	93836-50-1	82011.9	50593.7	75932	28333.6	18790.8	14945.3	1.31975	0.0237534	0.130629	0.297642	-1.74835	down
WMW0016	GC-MS	C12H20O2	(-)-Bornyl acetate	（-）-乙酸龙脑酯	Terpenoids	萜类	-	-	5655-61-8	276033	199138	407217	1.20868e+06	652935	1.45861e+06	1.27004	0.0681604	0.211843	3.76277	1.91179	up
XMW0803	GC-MS	C12H20O2	Iso-3-thujyl acetate	异-3-叔丁基乙酸酯	Ester	酯	-	-	62181-90-2	399570	213014	401819	1.31289e+06	1.62829e+06	1.61938e+06	1.3556	0.00154434	0.0469042	4.4958	2.16858	up
w39	GC-MS	C13H22O	2-Butanone, 4-(2,6,6-trimethyl-2-cyclohexen-1-yl)-	4-（2,6,6-三甲基-2-环己烯-1-基）-2-丁酮	Ketone	酮	-	-	31499-72-6	7.1551e+06	2.69394e+07	1.05428e+07	7.32185e+06	3.95787e+06	4.82916e+06	1.01622	0.258106	0.424779	0.360884	-1.47039	down
XMW0423	GC-MS	C13H22O	6,8-Nonadien-2-one, 8-methyl-5-(1-methylethyl)-, (E)-	（E）-8-甲基-5-（1-甲基乙基）-6,8-壬二烯-2-酮	Ketone	酮	-	-	54868-48-3	1.3578e+06	2.87374e+07	1.3845e+06	425951	271683	308844	1.08061	0.381366	0.516604	0.0319723	-4.96704	down
XMW0951	GC-MS	C12H18O2	2-Cyclohexen-1-ol, 2-methyl-5-(1-methylethenyl)-, acetate, (1R-cis)-	（1S-顺式）-2-甲基-5-（1-甲基乙烯基）-2-环己烯-1-基乙酸酯	Ester	酯	-	-	7111-29-7	9	9	9	16118.8	9	23127.8	1.00215	0.196232	0.363906	1453.91	10.5057	up
D425	GC-MS	C13H20O	3-Cyclohexene-1-carboxAldehyde, 4-(4-methyl-3-pentenyl)-	4-（4-甲基-3-戊烯基）-3-环己烯-1-甲醛	Aldehyde	醛	-	-	37677-14-8	1.08083e+06	2.03877e+06	1.18981e+06	336892	240146	213980	1.35884	0.0586187	0.197362	0.183556	-2.44571	down
KMW0554	GC-MS	C13H20O	.alpha.-Ionone	α-紫罗兰酮	Terpenoids	萜类	-	-	127-41-3	8.49523e+06	5.3269e+07	1.28736e+07	6.1166e+06	4.77543e+06	4.67728e+06	1.05142	0.301132	0.462817	0.208598	-2.2612	down
NMW0184	GC-MS	C13H20O	Ionone	紫罗兰酮	Terpenoids	萜类	-	-	8013-90-9	8.9448e+06	5.34388e+07	1.39066e+07	6.2899e+06	5.09221e+06	4.79336e+06	1.06916	0.290542	0.454673	0.212025	-2.23769	down
D388	GC-MS	C12H16O2	Butanoic acid, 1-phenylethyl ester	丁酸1-苯乙基酯	Ester	酯	-	-	3460-44-4	5.9595e+06	1.25124e+08	6.55426e+06	2.29998e+06	1.46384e+06	1.67607e+06	1.05132	0.381845	0.516604	0.0395234	-4.66115	down
XMW0858	GC-MS	C11H13FN2	6-fluoro-.beta.-methyl-1H-Indole-3-ethanAmine	6-氟-β-甲基-1H-吲哚-3-乙胺	Amine	胺	-	-	77590-52-4	48005.4	23953.9	34264.6	65265.2	160392	252844	1.20285	0.146879	0.30973	4.50464	2.17141	up
NMW0281	GC-MS	C12H14O2	3-Butylisobenzofuran-1(3H)-one	3-丁基异苯并呋喃-1（3H）-酮	Heterocyclic compound	杂环化合物	-	-	6066-49-5	449430	351294	1.00583e+06	215103	311291	179898	1.09545	0.210502	0.380816	0.39096	-1.35491	down
XMW1244	GC-MS	C11H22O2	Hexanoic acid, pentyl ester	己酸戊酯	Ester	酯	-	-	540-07-8	43696.5	23854.8	44180.3	95857.9	68812	104073	1.24674	0.0201098	0.124232	2.40525	1.26619	up
KMW0488	GC-MS	C13H28	Tridecane	十三烷	Hydrocarbons	烃类	-	-	629-50-5	27766.6	17119.6	25239.7	90050	90811.5	93055.2	1.37893	0.00116229	0.0458236	3.90607	1.96572	up
XMW1401	GC-MS	C11H20O2	n-Valeric acid cis-3-hexenyl ester	顺-3-己烯基酯-正戊酸	Ester	酯	-	-	35852-46-1	32236	8337.17	15119.9	55420.4	109451	66988.4	1.22524	0.0532686	0.189683	4.16317	2.05768	up
WMW0106	GC-MS	C11H20O2	6-Nonen-1-ol, acetate, (Z)-	顺-6-壬烯基乙酸酯	Ester	酯	-	-	76238-22-7	210368	9	9	257740	1.88442e+06	483899	1.06804	0.252968	0.422165	12.4821	3.64179	up
XMW1403	GC-MS	C11H20O2	cis-3-Hexenyl isovalerate	顺-3-异戊基异戊酸酯	Ester	酯	-	-	35154-45-1	33240	8986.52	19258.4	61633	105358	69547.8	1.22772	0.030752	0.147477	3.84709	1.94377	up
WMW0181	GC-MS	C11H20O2	4-Decenoic acid, methyl ester, Z-	Z-4-癸烯酸甲酯	Ester	酯	-	-	7367-83-1	3185.36	1499.44	4011.65	8209.93	8161.29	6670.92	1.21391	0.00834501	0.0843356	2.6496	1.40578	up
KMW0449	GC-MS	C11H18O2	Bicyclo[2.2.1]heptan-2-ol, 1,7,7-trimethyl-, formate, endo-	甲酸冰片	Acid	酸	-	-	7492-41-3	399863	256594	774843	1.37315e+06	1.09703e+06	1.76048e+06	1.21028	0.0210891	0.125722	2.95581	1.56356	up
XMW1158	GC-MS	C10H15NO2	Tricyclo[3.3.1.1(3,7)]decane, 2-nitro-	2-硝基-三环[3.3.1.1（3,7）]癸烷	Nitrogen compounds	含氮化合物	-	-	54564-31-7	62204.9	47600.2	153010	220462	170549	269871	1.13753	0.0394991	0.162411	2.51462	1.33034	up
NMW0215	GC-MS	C5H11NS3	N,N-Dimethyl-1,2,3-trithian-5-Amine	N，N-二甲基-1,2,3-三噻吩-5-胺	Amine	胺	-	-	31895-21-3	91559.5	49455.1	84078.1	23922	32537.6	24011.4	1.29416	0.0592975	0.198474	0.357501	-1.48398	down
WMW0077	GC-MS	C13H24	1-Tridecyne	1-十三炔	Hydrocarbons	烃类	-	-	26186-02-7	667408	368476	701515	1.96278e+06	2.43218e+06	2.29254e+06	1.34584	0.000972873	0.0457805	3.84915	1.94454	up
XMW1129	GC-MS	C10H12O3	Ethyl mandelate	扁桃酸乙酯	Ester	酯	-	-	774-40-3	1.22728e+07	7.66944e+07	1.95505e+07	9.06815e+06	7.11459e+06	6.93395e+06	1.05216	0.297044	0.460402	0.213022	-2.23092	down
XMW0280	GC-MS	C10H12O3	Carbonic acid, phenyl propyl ester	碳酸苯丙酯	Ester	酯	-	-	13183-16-9	28909.1	14712.8	31092.3	113465	90313	144051	1.3337	0.019642	0.123665	4.65547	2.21893	up
KMW0511	GC-MS	C11H14O2	Butyl benzoate	苯甲酸丁酯	Ester	酯	-	-	136-60-7	5.84798e+06	1.2491e+08	6.50518e+06	2.28208e+06	1.45162e+06	1.62552e+06	1.05085	0.382266	0.516604	0.0390434	-4.67878	down
D170	GC-MS	C11H14O2	p-Tolyl isobutyrate	对甲苯基异丁酸酯	Ester	酯	-	-	103-93-5	137782	98069.2	135164	580805	232640	483518	1.25953	0.094628	0.253478	3.49572	1.80559	up
D145	GC-MS	C11H14O2	Propanoic acid, 2-methyl-, phenylmethyl ester	2-甲基丙酸苄酯	Ester	酯	-	-	103-28-6	1.16859e+06	619579	1.09167e+06	3.57486e+06	4.51538e+06	4.12359e+06	1.35572	0.00143284	0.0469042	4.24115	2.08445	up
XMW0553	GC-MS	C10H10O3	2-Acetoxyacetophenone	2-乙酰氧基苯乙酮	Aromatics	芳烃	-	-	7250-94-4	7.09245e+06	2.68981e+07	1.05292e+07	7.2672e+06	3.94202e+06	4.803e+06	1.01589	0.258458	0.424968	0.359666	-1.47527	down
NMW0272	GC-MS	C10H7NO2	Naphthalene, 2-nitro-	2-硝基-萘	Phenol	酚	-	-	581-89-5	51505	53050	76182	26934.1	35004	24198.7	1.29167	0.0433968	0.168304	0.476587	-1.06919	down
XMW0364	GC-MS	C11H24O	6-Undecanol	6-十一烷醇	Alcohol	醇	-	-	23708-56-7	9	3646.39	9	13582.9	6538.34	9830.96	1.09543	0.0297585	0.146245	8.17385	3.03102	up
KMW0523	GC-MS	C11H24O	1-Undecanol	十一烷醇	Alcohol	醇	-	-	112-42-5	286394	5.15989e+06	275525	96752.2	64092.4	77262.2	1.06352	0.377811	0.516604	0.0416139	-4.58679	down
D273	GC-MS	C10H20O2	Butanoic acid, 2-methyl-, 2-methylbutyl ester	2-甲基丁酸2-甲基丁酯	Ester	酯	-	-	2445-78-5	27170.2	9092.03	14227.9	6121.34	8113.38	6412.81	1.08451	0.204269	0.372709	0.408942	-1.29003	down
NMW0037	GC-MS	C10H20O2	Butanoic acid, 3-methyl-, 3-methylbutyl ester	3-甲基-丁酸3-甲基丁酯	Ester	酯	-	-	659-70-1	27170.2	9092.03	14227.9	5937.66	7883.08	5644.12	1.11221	0.192619	0.358323	0.385519	-1.37513	down
XMW1226	GC-MS	C10H20O2	Hexanoic acid, 2-methylpropyl ester	2-甲基丙酯-己酸	Ester	酯	-	-	105-79-3	4685.61	1801.36	5252.69	8898.12	11863.4	8604.69	1.14973	0.0169975	0.114428	2.50145	1.32277	up
D305	GC-MS	C10H20O2	Butanoic acid, 2-methyl-, 3-methylbutyl ester	丁酸，2-甲基-，3-甲基丁酯	Ester	酯	-	-	27625-35-0	27170.2	9092.03	14227.9	5729.09	7904.04	5057.73	1.12347	0.184826	0.352084	0.370189	-1.43367	down
D313	GC-MS	C10H20O2	3-Hexene, 1-(1-ethoxyethoxy)-, (Z)-	（Z）-1-（1-乙氧基乙氧基）己-3-烯	Aldehyde	醛	-	-	28069-74-1	6299.96	2076.35	4035.28	707.466	1776.59	928.888	1.17153	0.125074	0.290537	0.27498	-1.8626	down
XMW1218	GC-MS	C10H20O2	2-Nonanone, 3-(hydroxymethyl)-	3-（羟甲基）-2-壬酮	Ketone	酮	-	-	67801-33-6	9262.85	8517.14	13330.3	21315.4	18730.4	23922.1	1.29908	0.00663938	0.0767731	2.05617	1.03996	up
w06	GC-MS	C12H26	Heptane, 2,2,4,6,6-pentamethyl-	2,2,4,6,6-五甲基-庚烷	Hydrocarbons	烃类	-	-	13475-82-6	77416.7	46936.1	111425	389509	382670	385871	1.3469	0.00335211	0.0598059	4.91161	2.2962	up
NMW0162	GC-MS	C10H18O2	8-Methyl-6-nonenoic Acid	8-甲基-6-壬烯酸	Acid	酸	-	-	21382-25-2	232808	5.49869e+06	289397	99381.6	56971.5	59335.6	1.05656	0.383157	0.517059	0.0358234	-4.80295	down
NMW0127	GC-MS	C10H18O2	6-Octenoic Acid, 3,7-dimethyl-	3,7-二甲基-6-辛烯酸	Acid	酸	-	-	502-47-6	333502	126847	367742	126500	67819	75306.3	1.14078	0.1247	0.290044	0.325598	-1.61884	down
XMW0775	GC-MS	C12H24	1-Undecene, 9-methyl-	9-甲基-1-十一碳烯	Hydrocarbons	烃类	-	-	74630-41-4	19523.7	12228.4	48176.2	184626	134490	235518	1.29991	0.0215304	0.126143	6.93914	2.79476	up
D110	GC-MS	C10H16O2	Bicyclo[3.1.1]heptan-3-one, 2-hydroxy-2,6,6-trimethyl-	2-羟基-2,6,6-三甲基-双环[3.1.1]庚-3-酮	Ketone	酮	-	-	10136-65-9	92695.8	54065.9	107089	244324	193060	301253	1.28927	0.0196865	0.123665	2.90973	1.54088	up
NMW0087	GC-MS	C10H16O2	2-Oxabicyclo[2.2.2]octan-6-one, 1,3,3-trimethyl-	1,3,3-三甲基-2-氧杂双环[2.2.2]辛酮	Terpenoids	萜类	-	-	107598-08-3	1.26774e+06	1.71264e+06	3.35889e+06	3.58761e+06	3.46469e+06	5.98319e+06	1.06361	0.102076	0.263166	2.05631	1.04006	up
XMW0246	GC-MS	C10H16O2	OxiranecarboxAldehyde, 3-methyl-3-(4-methyl-3-pentenyl)-	3-甲基-3-（4-甲基-3-戊烯基）-环氧乙烷甲醛	Aldehyde	醛	-	-	16996-12-6	9	9	24115.4	36621.6	41761.7	47818.3	1.03735	0.0371365	0.158559	5.22934	2.38663	up
XMW1400	GC-MS	C6H14FO2P	n-Pentyl methylphosphonofluoridate	正戊基甲基氟膦酸酯	Ester	酯	-	-	13454-59-6	1177.39	1932.87	803.794	3378.54	4935.39	5487.91	1.29243	0.0187149	0.119668	3.52623	1.81813	up
D344	GC-MS	C11H18O	(E,E)-2,4-Undecadienal	（E，E）-2,4-十一烯醛	Aldehyde	醛	-	-	30361-29-6	1.58753e+07	1.11745e+08	2.35287e+07	1.20853e+07	8.9614e+06	9.25414e+06	1.0143	0.320523	0.477306	0.20047	-2.31854	down
XMW0424	GC-MS	C11H18O	2,6-Dimethyl-1-nonen-3-yn-5-ol	2,6-二甲基-1-壬烯基-5-醇	Alcohol	醇	-	-	19780-98-4	159925	87322.9	167300	551495	737345	656297	1.35572	0.00401746	0.0615797	4.69219	2.23026	up
D113	GC-MS	C10H14O2	Benzene, (2,2-dimethoxyethyl)-	（2,2-二甲氧基乙基）-苯	Aromatics	芳烃	-	-	101-48-4	8887.4	6650.88	18184.9	30440.6	21298.3	35317.5	1.17731	0.0314843	0.150584	2.5815	1.36821	up
XMW0472	GC-MS	C9H10O3	1,2-Ethanediol, monobenzoate	1,2-乙二醇单苯甲酸酯	Ester	酯	-	-	94-33-7	4.69733e+07	1.59981e+08	6.7391e+07	4.73689e+07	2.63082e+07	3.12236e+07	1.03104	0.243437	0.413611	0.382367	-1.38697	down
D343	GC-MS	C10H12O2	3-Methoxyphenyl acetone	3-甲氧苯基丙酮	Ketone	酮	-	-	3027-13-2	162749	913766	269379	137253	108768	109344	1.01506	0.294511	0.458395	0.264036	-1.92119	down
XMW1140	GC-MS	C10H12O2	2-methyl-5-propan-2-ylcyclohexa-2,5-diene-1,4-dione	2-甲基-5-丙-2-基环己-2,5-二烯-1,4-二酮	Ketone	酮	-	-	490-91-5	57784.3	338189	57838.5	6018.99	7181.78	4370.18	1.30199	0.259996	0.427102	0.0387186	-4.69083	down
KMW0601	GC-MS	C10H12O2	2-Butanone, 4-(4-hydroxyphenyl)-	覆盆子酮	Ketone	酮	-	-	5471-51-2	2.31287e+06	6.40153e+06	3.12453e+06	1.49746e+06	942352	1.21018e+06	1.21081	0.158567	0.323666	0.308304	-1.69758	down
D143	GC-MS	C10H12O2	Benzenepropanoic acid, methyl ester	苯丙酸甲酯	Ester	酯	-	-	103-25-3	4358.77	2676.46	5477.74	14546.6	17737.9	17741.2	1.34629	0.00100081	0.0457805	3.99791	1.99924	up
XMW0794	GC-MS	C12H18	1,5-Cyclooctadiene, 3-(1-methyl-2-propenyl)-	3-（1-甲基-2-丙烯基）-1,5-环辛二烯	Hydrocarbons	烃类	-	-	16538-88-8	727713	325294	207665	9	9	9	1.40532	0.116387	0.281155	2.14172e-05	-15.5109	down
XMW0470	GC-MS	C10H14N2	1-ButanAmine, N-(2-pyridinylmethylene)-	N-（2-吡啶基亚甲基）-1-丁胺	Amine	胺	-	-	7032-24-8	5.65195e+07	1.91985e+08	8.19002e+07	5.74121e+07	3.16494e+07	3.76827e+07	1.03123	0.241643	0.412132	0.383603	-1.38231	down
D102	GC-MS	C11H14O	1-Pentanone, 1-phenyl-	1-苯基-1-戊酮	Ketone	酮	-	-	1009-14-9	5.96719e+06	1.24323e+08	6.5603e+06	2.30218e+06	1.46553e+06	1.67059e+06	1.05228	0.381517	0.516604	0.039739	-4.6533	down
XMW0805	GC-MS	C10H10S	Benzo[b]thiophene, 2-ethyl-	2-乙基-苯并[b]噻吩	Heterocyclic compound	杂环化合物	-	-	1196-81-2	1.02312e+07	4.08898e+07	1.57815e+07	1.05752e+07	5.19257e+06	6.81034e+06	1.02272	0.255886	0.423748	0.337479	-1.56713	down
KMW0416	GC-MS	C6H8OS2	Furan, 2-[(methyldithio)methyl]-	糠基甲基二含硫化合物	Sulfur compounds	含硫化合物	-	-	57500-00-2	820664	511528	1.59476e+06	2.84266e+06	2.10608e+06	3.42876e+06	1.19237	0.0232296	0.129341	2.86219	1.51712	up
NMW0086	GC-MS	C11H13N	Pargyline	矮牵牛	Amine	胺	-	-	555-57-7	1.26774e+06	1.71264e+06	3.38314e+06	3.50426e+06	3.38047e+06	6.1007e+06	1.04383	0.120991	0.285514	2.04061	1.029	up
XMW1310	GC-MS	C9H18O2	Isobutyl isovalerate	异戊酸异丁酯	Ester	酯	-	-	589-59-3	10318.1	5686.61	10923.4	28478.9	15460.2	28438.8	1.21664	0.0583799	0.197362	2.68781	1.42643	up
D271	GC-MS	C9H18O2	Propanoic acid, hexyl ester	丙酸己酯	Ester	酯	-	-	2445-76-3	237712	84354.5	149206	290555	239077	423440	1.0573	0.088337	0.245559	2.02234	1.01602	up
D269	GC-MS	C9H18O2	Butanoic acid, 2-methyl-, 2-methylpropyl ester	丁酸2-甲基-2-甲基丙酯	Ester	酯	-	-	2445-67-2	54057	32783.1	56226.2	181544	111441	169687	1.31273	0.0284528	0.142985	3.23397	1.69331	up
XMW1211	GC-MS	C9H18O2	2-Heptanol, acetate	1-甲基己基乙酸酯	Ester	酯	-	-	5921-82-4	18363.5	4216.49	11216.9	59239.9	61355.3	54757.2	1.27195	0.00230105	0.0540142	5.18842	2.37529	up
XMW0403	GC-MS	C11H24	Nonane, 2,5-dimethyl-	2,5-二甲基壬烷	Hydrocarbons	烃类	-	-	17302-27-1	17907.5	6006.37	22128.7	36513.4	35611.9	38132.2	1.0998	0.0444494	0.171138	2.39469	1.25984	up
WMW0083	GC-MS	C10H20O	2-Decen-1-ol, (E)-	反式-2-癸烯醇	Alcohol	醇	-	-	18409-18-2	67559.9	45504.6	75181.7	130671	123994	155587	1.30199	0.00492299	0.066535	2.17934	1.12389	up
KMW0342	GC-MS	C10H18O	Citronellal	香茅醛	Terpenoids	萜类	-	-	106-23-0	107389	78441.5	230986	1.08505e+06	829322	1.33097e+06	1.33961	0.0155752	0.113658	7.78603	2.96089	up
D409	GC-MS	C10H18O	(S)-2,5-Dimethyl-3-vinylhex-4-en-2-ol	（S）-2,5-二甲基-3-乙烯基己基-4-烯-2-醇	Alcohol	醇	-	-	35671-15-9	2.54455e+06	672032	1.6361e+06	2.09045e+07	2.16481e+07	2.00892e+07	1.35402	1.40633e-05	0.00627224	12.9087	3.69027	up
XMW1072	GC-MS	C10H18O	(E)-2,6-Dimethylocta-5,7-dien-2-ol	（E）-2,6-二甲基辛基-5,7-二烯-2-醇	Alcohol	醇	-	-	7643-60-9	9	28420.9	9	181558	88981.1	280635	1.1248	0.0837768	0.239132	19.381	4.27657	up
XMW0217	GC-MS	C10H18O	cis-7-Decen-1-al	Cis-7-癸烯醛	Aldehyde	醛	-	-	21661-97-2	283517	308565	630328	919054	844988	1.3479e+06	1.21284	0.0356367	0.156245	2.54574	1.34809	up
KMW0588	GC-MS	C10H18O	3-Cyclohexene-1-ethanol, .beta.,4-dimethyl-	2-（4-甲基环己-3-烯-1-基）丙-1-醇	Alcohol	醇	-	-	18479-68-0	456356	250220	473733	1.36303e+06	1.68739e+06	1.60171e+06	1.34792	0.000977456	0.0457805	3.94145	1.97873	up
KMW0362	GC-MS	C10H18O	Isoborneol	异樟脑	Terpenoids	萜类	-	-	124-76-5	61297.1	24878.2	94683.7	483003	553913	639129	1.33435	0.00291101	0.0577026	9.26714	3.21212	up
XMW1227	GC-MS	C9H14O2	(E)-2-Methylbut-2-en-1-yl methacrylate	（E）-2-甲基丙烯酸-2-甲基丁-2-烯-1-基酯	Ester	酯	-	-	88142-95-4	673705	180294	767411	2.22152e+06	2.30884e+06	3.03299e+06	1.23447	0.00461515	0.0650452	4.66468	2.22178	up
XMW1131	GC-MS	C8H10O3	2,5-Furandione, 3-methyl-4-propyl-	3-甲基-4-丙基-2,5-呋喃二酮	Ketone	酮	-	-	16493-20-2	5880.35	1790.75	5006	28015.6	57040.6	38312.9	1.32654	0.0464994	0.175752	9.73165	3.28268	up
NMW0234	GC-MS	C7H6O4	Patulin	帕特林	Alcohol	醇	-	-	149-29-1	918557	1.94615e+06	1.00841e+06	296125	219013	217590	1.3457	0.0851038	0.240992	0.189183	-2.40215	down
XMW0681	GC-MS	C10H16O	6-Octenal, 7-methyl-3-methylene-	7-甲基-3-亚甲基-6-辛烯醛	Aldehyde	醛	-	-	55050-40-3	14937.6	9104	26228.1	41761.5	37931	48465.9	1.20001	0.0175702	0.115665	2.54942	1.35017	up
KMW0324	GC-MS	C10H16O	Limonene oxide, cis-	（Z）-柠檬烯氧化物	Terpenoids	萜类	-	-	13837-75-7	19001.9	8728.25	20387.6	112700	178698	186531	1.36302	0.0234176	0.129341	9.93248	3.31215	up
XMW0526	GC-MS	C10H16O	AcetAldehyde, (3,3-dimethylcyclohexylidene)-, (Z)-	（Z）-（3,3-二甲基环己叉基）-乙醛	Aldehyde	醛	-	-	26532-24-1	390553	243277	765700	1.34471e+06	963680	1.61801e+06	1.17985	0.0280828	0.142578	2.80552	1.48827	up
XMW0189	GC-MS	C10H16O	3-Cyclohexene-1-acetAldehyde, .alpha.,4-dimethyl-	α，4-二甲基-3-环己烯-1-乙醛	Aldehyde	醛	-	-	29548-14-9	193437	122698	389659	740135	540032	881139	1.20661	0.0204287	0.124232	3.06223	1.61458	up
KMW0181	GC-MS	C10H16O	2,3-Dehydro-1,8-cineole	2,3-脱氢-1,8-桉树脑	Terpenoids	萜类	-	-	92760-25-3	21276.1	3197.52	17143.6	387414	310553	375703	1.33376	0.00334797	0.0598059	25.7987	4.68923	up
KMW0329	GC-MS	C10H16O	Camphor	樟脑	Terpenoids	萜类	-	-	76-22-2	39102.7	12472.6	24203.2	56181.2	80434.2	62292.1	1.17974	0.0180851	0.117751	2.62485	1.39224	up
XMW0654	GC-MS	C10H16O	Ethanone, 1-(1,4-dimethyl-3-cyclohexen-1-yl)-	1-（1,4-二甲基-3-环己烯-1-基）-乙酮	Terpenoids	萜类	-	-	43219-68-7	95604.7	32048.9	126600	585089	634244	709104	1.31366	0.000362663	0.0385689	7.58468	2.92309	up
KMW0310	GC-MS	C10H16O	2-Cyclohexen-1-ol, 1-methyl-4-(1-methylethenyl)-, trans-	（1R，4R）-1-甲基-4-丙-1-烯-2-基环己基-2-烯-1-醇	Alcohol	醇	-	-	7212-40-0	10751.6	9718.61	16961.7	35787.2	33858.7	45086.9	1.33641	0.00550531	0.0693368	3.06511	1.61594	up
D193	GC-MS	C10H16O	p-Mentha-1,8-dien-7-ol	对-孟沙-1,8-二烯-7-醇	Terpenoids	萜类	-	-	536-59-4	281880	157618	300659	811523	1.01068e+06	953560	1.34395	0.0011023	0.0458236	3.75023	1.90698	up
XMW0766	GC-MS	C10H16O	Cyclohexanone, 5-methyl-2-(1-methylethylidene)-	5-甲基-2-（1-甲基亚乙基）-环己酮	Terpenoids	萜类	-	-	15932-80-6	447319	526153	1.03685e+06	1.0634e+06	1.09134e+06	1.92992e+06	1.06572	0.122536	0.286131	2.03184	1.02279	up
KMW0290	GC-MS	C10H16O	Hotrienol	丁烯醇	Alcohol	醇	-	-	20053-88-7	8.36406e+06	2.61006e+06	3.70901e+06	608034	664400	778052	1.31246	0.139488	0.303472	0.139649	-2.84012	down
QWM0003	GC-MS	C10H16O	2H-Pyran, 3,6-dihydro-4-methyl-2-(2-methyl-1-propenyl)-	3,6-二氢-4-甲基-2-（2-甲基-1-丙烯基）-2H-吡喃	Terpenoids	萜类	-	-	1786-08-9	46470.3	23789	86720.1	421224	479969	511211	1.33963	0.000387319	0.0385689	8.99739	3.16951	up
XMW1133	GC-MS	C10H16O	5-Isopropyl-3,3-dimethyl-2-methylene-2,3-dihydrofuran	5-异丙基-3,3-二甲基-2-亚甲基-2,3-二氢呋喃	Heterocyclic compound	杂环化合物	-	-	81250-44-4	442846	254722	470522	1.82712e+06	999709	1.66905e+06	1.30847	0.0407663	0.163362	3.84891	1.94445	up
KMW0459	GC-MS	C10H16O	2,6-Octadienal, 3,7-dimethyl-, (E)-	（E）-3,7-二甲基-2,6-辛二烯醛	Terpenoids	萜类	-	-	141-27-5	300004	117144	114067	14287.3	22349.5	25740.9	1.32219	0.125679	0.290923	0.117425	-3.09019	down
XMW1147	GC-MS	C10H16O	Tricyclo[2.2.1.0(2,6)]heptane-3-methanol, 2,3-dimethyl-	2,3-二甲基-三环[2.2.1.0（2,6）]庚烷-3-甲醇	Terpenoids	萜类	-	-	29550-55-8	514834	357722	512671	2.42376e+06	673741	1.64729e+06	1.14715	0.156127	0.321729	3.42528	1.77622	up
XMW0764	GC-MS	C10H16O	(S)-(-)-(4-Isopropenyl-1-cyclohexenyl)methanol	（S）-（-）-（4-异丙烯基-1-环己烯基）甲醇	Terpenoids	萜类	-	-	18457-55-1	14083.1	5268.56	16041.1	9	9	9	1.40288	0.0707094	0.216784	0.000762867	-10.3563	down
XMW1386	GC-MS	C9H12O2	2-Acetyl-4,4-dimethyl-cyclopent-2-enone	2-乙酰基-4,4-二甲基-环戊-2-烯酮	Ketone	酮	-	-	81979-96-6	473299	379840	855996	1.552e+06	1.40787e+06	2.09988e+06	1.27222	0.0156088	0.113658	2.96042	1.5658	up
NMW0236	GC-MS	C8H8O3	Benzeneacetic Acid, 4-hydroxy-	4-羟基-苯乙酸	Acid	酸	-	-	156-38-7	2.31189e+06	6.08072e+06	3.12453e+06	1.48159e+06	941148	1.19759e+06	1.22361	0.145904	0.308876	0.314343	-1.66959	down
XMW0738	GC-MS	C8H9NO2	Benzoic acid, 4-amino-, methyl ester	苯甲酸4-氨基甲酯	Ester	酯	-	-	619-45-4	1.74994e+06	4.07489e+07	1.93754e+06	681109	433233	498784	1.04165	0.385797	0.518715	0.0363019	-4.78381	down
XMW1139	GC-MS	C11H18	Naphthalene, 1,2,3,4,4a,5,6,7-octahydro-4a-methyl-	1,2,3,4,4a，5,6,7-八氢-4a-甲基-萘	Aromatics	芳烃	-	-	13943-77-6	29269.5	17524.2	70508.8	132663	111285	183028	1.20792	0.0205428	0.124232	3.63996	1.86392	up
XMW0690	GC-MS	C11H18	Cyclohexene, 2,4-dimethyl-1-(1-methylethenyl)-	2,4-二甲基-1-（1-甲基乙烯基）-环己烯	Hydrocarbons	烃类	-	-	56763-60-1	9.53839e+06	2.99878e+06	4.36671e+06	1.10346e+06	1.06528e+06	1.53237e+06	1.24881	0.156973	0.321729	0.21895	-2.19132	down
XMW0925	GC-MS	C10H14O	Camphenone, 6-	6-甲苯酮	Ketone	酮	-	-	55659-42-2	9.53934e+06	2.99687e+06	4.36131e+06	1.09975e+06	1.05538e+06	1.52489e+06	1.24945	0.156862	0.321729	0.217785	-2.19903	down
NMW0120	GC-MS	C10H14O	Phenol, p-tert-butyl-	对叔丁基苯酚	Phenol	酚	-	-	98-54-4	212880	123256	225128	624338	767958	715813	1.35139	0.00085151	0.0457805	3.75601	1.9092	up
XMW0968	GC-MS	C10H14O	4,7,7-Trimethylbicyclo[4.1.0]hept-3-en-2-one	4,7,7-三甲基双环[4.1.0] 庚-3-烯-2-酮	Ketone	酮	-	-	81800-50-2	374509	142521	405221	122394	74368.9	67202.8	1.191	0.11244	0.275292	0.28622	-1.80481	down
XMW0721	GC-MS	C10H14O	Benzene, 1-methoxy-4-propyl-	1-甲氧基-4-丙基-苯	Aromatics	芳烃	-	-	104-45-0	18837.5	11945	21962.9	51470.3	40245.8	64440.2	1.30506	0.0251017	0.134076	2.96057	1.56587	up
KMW0473	GC-MS	C10H14O	4-Isopropylcyclohexa-1,3-dienecarbAldehyde	1,3-p-薄荷脑-7-醛	Aldehyde	醛	-	-	1197-15-5	206633	120355	250013	635782	762839	754638	1.3372	0.000738775	0.0454474	3.73181	1.89988	up
NMW0006	GC-MS	C10H14O	2-Cyclohexen-1-one, 3-methyl-6-(1-methylethylidene)-	3-甲基-6-（1-甲基亚乙基）-2-环己烯-1-酮	Terpenoids	萜类	-	-	491-09-8	22054.8	13466.8	23236.5	489680	321367	525221	1.39513	0.0208985	0.125111	22.7418	4.50728	up
XMW0615	GC-MS	C10H14O	Phenol, m-tert-butyl-	间叔丁基-苯酚	Phenol	酚	-	-	585-34-2	216954	123256	225128	629416	777482	717075	1.34991	0.000907513	0.0457805	3.757	1.90958	up
XMW0909	GC-MS	C10H14O	2,6,6-Trimethylbicyclo[3.2.0]hept-2-en-7-one	2,6,6-三甲基双环[3.2.0]庚-2-烯-7-酮	Terpenoids	萜类	-	-	4613-37-0	3.69019e+06	1.1877e+06	1.67385e+06	487821	439607	700371	1.22059	0.164079	0.328654	0.248453	-2.00896	down
XMW1252	GC-MS	C10H14O	2(1H)-Naphthalenone, 3,4,5,6,7,8-hexahydro-	3,4,5,6,7,8-六氢-2（1H）-萘酮	Ketone	酮	-	-	13837-12-2	58848.3	18712.9	64257.5	22770.7	11542.4	15932.8	1.03034	0.162001	0.327676	0.354296	-1.49697	down
KMW0408	GC-MS	C10H14O	Benzenemethanol, .alpha.,.alpha.,4-trimethyl-	对苯三酚	Terpenoids	萜类	-	-	1197-01-9	29034.8	17524.2	70508.8	132663	111285	183028	1.20819	0.0205023	0.124232	3.64726	1.86681	up
NMW0128	GC-MS	C10H14O	Phenol, 4-(1-methylpropyl)-	4-（1-甲基）苯酚	Phenol	酚	-	-	99-71-8	111694	44941.2	115509	41193	21684.1	23614.8	1.17796	0.105359	0.267369	0.317817	-1.65373	down
NMW0039	GC-MS	C6H14S2	DiSulfur compounds, dipropyl	二硫化二丙基	Sulfur compounds	含硫化合物	-	-	629-19-6	892506	449143	1.223e+06	2.76486e+06	2.28788e+06	3.9694e+06	1.25674	0.0339088	0.153514	3.51788	1.81471	up
XMW0545	GC-MS	C10H15N	Benzenemethanamine, N-(1-methylethyl)-	N-（1-甲基乙基）-苯甲胺	Aromatics	芳烃	-	-	102-97-6	865836	612084	1.87271e+06	3.05622e+06	2.27475e+06	3.64085e+06	1.17345	0.0274607	0.141038	2.67765	1.42097	up
D355	GC-MS	C10H15N	2,6-Octadienenitrile, 3,7-dimethyl-, (Z)-	（2Z）-3,7-二甲基辛基-2,6-二烯腈	Nitrogen compounds	含氮化合物	-	-	31983-27-4	9	9	7753.08	8981.43	9278.39	12432.2	1.01712	0.0810902	0.234827	3.94951	1.98168	up
NMW0143	GC-MS	C10H15N	BenzenAmine, 2,6-diethyl-	2,6-二乙基苯甲胺	Amine	胺	-	-	579-66-8	55783.8	70750	61884.2	9	3529.54	9	1.22248	0.00302359	0.0589364	0.018828	-5.73097	down
NMW0135	GC-MS	C8H7NS	Thiocyanic acid, phenylmethyl ester	苯甲基酯硫氰酸	Sulfur compounds	含硫化合物	-	-	3012-37-1	32231.1	17163	38662.1	152394	116659	192176	1.33761	0.022254	0.126143	5.2379	2.38899	up
XMW0926	GC-MS	C10H12O	Ethanone, 1-(2,4-dimethylphenyl)-	1-（2,4-二甲基苯基）-乙酮	Ketone	酮	-	-	89-74-7	30305.6	51449.1	22621.3	9	24536.7	9	1.02561	0.0888394	0.245559	0.235252	-2.08772	down
KMW0213	GC-MS	C6H12O2S	3-Mercapto-3-methylbutyl formate (ester)	巯基甲基丁酸酯	Sulfur compounds	含硫化合物	-	-	50746-10-6	17769.6	5923.64	22217.8	73783.9	74940	64316.3	1.26239	0.00121872	0.0458236	4.64028	2.21421	up
NMW0070	GC-MS	C9H8O2	1,2-Propanedione, 1-phenyl-	1-苯基-1,2-丙二酮	Ketone	酮	-	-	579-07-7	84748.4	59976.6	102759	311971	460024	503813	1.36636	0.0233959	0.129341	5.15512	2.36601	up
XMW0533	GC-MS	C9H8S	3-Methylbenzothiophene	3-甲基苯并噻吩	Heterocyclic compound	杂环化合物	-	-	1455-18-1	5358.1	5588.44	7424.97	12248.8	14362.1	13260.1	1.35267	0.00134291	0.0460721	2.17026	1.11787	up
XMW0811	GC-MS	C9H9NO	Phenethyl isocyanate	异氰酸苯乙酯	Ester	酯	-	-	1943-82-4	859200	608813	1.87271e+06	3.05148e+06	2.26621e+06	3.6385e+06	1.17213	0.0279099	0.142261	2.68091	1.42272	up
D455	GC-MS	C7H14O3	Pentanoic acid, 2-hydroxy-4-methyl-, methyl ester	2-羟基-4-甲基-戊酸甲酯	Ester	酯	-	-	40348-72-9	1.80933e+06	276410	1.4692e+06	2.90207e+07	2.41986e+07	2.8659e+07	1.33032	0.00182091	0.0477721	23.0323	4.52558	up
WMW0109	GC-MS	C8H16O2	Propanoic acid, 2-methyl-, 2-methylpropyl ester	异丁酸异丁酯	Ester	酯	-	-	97-85-8	17759	7254.14	23347.3	47681.2	28822.3	41451.5	1.10782	0.0345733	0.155085	2.43908	1.28634	up
KMW0204	GC-MS	C8H16O2	Acetic acid, hexyl ester	乙酸己酯	Ester	酯	-	-	142-92-7	32183.8	17638.7	26852.1	48488.4	51295.9	55784.9	1.26648	0.0122303	0.101957	2.02896	1.02074	up
XMW0605	GC-MS	C10H22	Heptane, 3-ethyl-2-methyl-	3-乙基-2-甲基-庚烷	Hydrocarbons	烃类	-	-	14676-29-0	15700.7	3037.55	44656.9	149240	133171	140299	1.17586	0.00515037	0.0675607	6.66785	2.73722	up
KMW0208	GC-MS	C10H22	Decane	癸烷	Hydrocarbons	烃类	-	-	124-18-5	53171.4	32616.7	55709.5	179155	109184	167261	1.3121	0.0297558	0.146245	3.21984	1.68699	up
XMW1299	GC-MS	C10H22	Heptane, 3,3,5-trimethyl-	3,3,5-三甲基-庚烷	Hydrocarbons	烃类	-	-	7154-80-5	17757.1	7254.14	23347.3	38788.4	27485.6	37084.7	1.06707	0.0396808	0.162411	2.13734	1.09582	up
KMW0282	GC-MS	C9H18O	Nonanal	正壬醛	Aldehyde	醛	-	-	124-19-6	37224.7	21790.3	20451.2	9392.63	15712.3	10283	1.19385	0.0984948	0.258404	0.44532	-1.16709	down
QWM0006	GC-MS	C9H18O	2-Nonanone	2-壬基酮	Ketone	酮	-	-	821-55-6	8928.21	8517.14	13339.3	21315.4	18730.4	23934.6	1.29648	0.00681732	0.0771342	2.07832	1.05542	up
WMW0028	GC-MS	C9H18O	4-Heptanone, 2,6-dimethyl-	2,6-二甲基-4-庚酮	Ketone	酮	-	-	108-83-8	2883.61	1679.23	2776.9	15927.7	38322.2	18243.2	1.35329	0.0921203	0.250341	9.8768	3.30404	up
NMW0016	GC-MS	C8H14O2	Acetic acid, cyclohexyl ester	醋酸环己酯	Ester	酯	-	-	622-45-7	565873	178341	386042	4.4893e+06	4.63235e+06	4.32496e+06	1.36352	1.37347e-05	0.00627224	11.897	3.57252	up
D417	GC-MS	C8H14O2	3-Hexen-1-ol, acetate, (E)-	反式-3-己烯基乙酸酯	Ester	酯	-	-	3681-82-1	37449.5	30433.4	46350.3	260654	106273	182431	1.31591	0.0813259	0.234827	4.80911	2.26577	up
D229	GC-MS	C8H14O2	Allyl isovalerate	异戊酸烯丙酯	Ester	酯	-	-	2835-39-4	20015.6	8862.85	25983.4	52933.2	35568.2	52177.1	1.16225	0.0199649	0.124232	2.56423	1.35853	up
XMW0434	GC-MS	C8H14O2	4-Hexen-1-ol, acetate	4-己烯-1-醇，乙酸	Others	其它类	-	-	72237-36-6	153638	49688.4	174604	760088	793269	744705	1.30207	0.00138333	0.0465633	6.08065	2.60423	up
XMW1117	GC-MS	C8H14O2	2-Propenoic acid, pentyl ester	2-丙酸戊酯	Ester	酯	-	-	2998-23-4	86449.5	50831.8	121828	175769	207540	194319	1.20599	0.0213245	0.126143	2.22929	1.15658	up
XMW0574	GC-MS	C8H14O2	4-Penten-1-ol, propanoate	4-戊烯-1-醇丙酸酯	Ester	酯	-	-	30563-30-5	36332.2	32779.7	69969.2	116688	116588	124021	1.26927	0.0217715	0.126143	2.56898	1.3612	up
w07	GC-MS	C11H10	1H-Indene, 1-ethylidene-	1-亚乙基-1H-茚	Hydrocarbons	烃类	-	-	2471-83-2	17060.5	16360.2	15315.9	50657.4	39796.6	49368.1	1.3938	0.0111658	0.0957683	2.86893	1.52051	up
XMW0162	GC-MS	C7H10O3	3-Penten-2-one, 4-(acetyloxy)-, (Z)-	（Z）-4-（乙酰氧基）-3-戊烯酮	Ketone	酮	-	-	38365-58-1	976.808	784.821	1069.94	4319.94	2617.02	3833.31	1.36121	0.0318218	0.151154	3.80364	1.92738	up
NMW0031	GC-MS	C8H15NO	Hygrine	古豆碱	Heterocyclic compound	杂环化合物	-	-	496-49-1	530230	140270	606434	1.43986e+06	1.48608e+06	1.91541e+06	1.19252	0.0047763	0.0650452	3.79138	1.92272	up
NMW0097	GC-MS	C8H15NO	8-Azabicyclo[3.2.1]octan-3-ol, 8-methyl-, exo-	8-甲基-8-氮杂双环[3.2.1]-3-辛烷醇	Alcohol	醇	-	-	135-97-7	14067.8	4321.4	21471.1	54443.9	63134	63427.7	1.22589	0.00285176	0.0571633	4.54099	2.18301	up
NMW0091	GC-MS	C8H15NO	8-Azabicyclo[3.2.1]octan-3-ol, 8-methyl-, endo-	8-甲基-8-氮杂双环[3.2.1]辛烷-3-醇	Alcohol	醇	-	-	120-29-6	61599.2	62932.2	147633	275079	275964	322340	1.27399	0.00774003	0.0812248	3.20903	1.68214	up
XMW0119	GC-MS	C9H16O	Cyclopentanone, 2-methyl-3-(1-methylethyl)-	2-甲基-3-（1-甲基乙基）-环戊酮	Ketone	酮	-	-	54549-81-4	4811.65	3332.77	5405.28	266266	207153	292475	1.40452	0.0099396	0.0911279	56.5248	5.82081	up
XMW0486	GC-MS	C9H16O	Cyclohexanone, 2,2,6-trimethyl-	2,2,6-三甲基-环己酮	Ketone	酮	-	-	2408-37-9	544307	169702	357321	4.44281e+06	4.60955e+06	4.26519e+06	1.36479	1.06221e-05	0.00627224	12.4308	3.63585	up
XMW0181	GC-MS	C9H16O	5-Hepten-2-one, 4,6-dimethyl-	4,6-二甲基-5-庚-2-酮	Ketone	酮	-	-	31162-48-8	1614.17	894.166	2770.91	6735.95	16397.6	17514.2	1.29575	0.0714356	0.217476	7.69955	2.94477	up
KMW0078	GC-MS	C9H16O	8-Nonen-2-one	8-壬烯-2-酮	Ketone	酮	-	-	5009-32-5	16126.7	4664.06	10142.4	3111.57	5727.03	2961.74	1.02674	0.187583	0.353028	0.381478	-1.39033	down
KMW0531	GC-MS	C9H16O	3,6-Nonadien-1-ol, (E,Z)-	（E，Z）-3,6-壬二烯-1-醇	Alcohol	醇	-	-	56805-23-3	109471	55405.3	175917	951202	1.29557e+06	1.35177e+06	1.35467	0.00898011	0.0881854	10.5593	3.40044	up
XMW0643	GC-MS	C7H12N2O	Butyramide, 2-cyano-2-ethyl-	2-氰基-2-乙基-丁酰胺	Amine	胺	-	-	18705-38-9	199441	132856	197618	771666	269704	566417	1.1791	0.129547	0.295235	3.03405	1.60124	up
XMW0168	GC-MS	C8H12S	3-Butylthiophene	3-丁基噻吩	Heterocyclic compound	杂环化合物	-	-	34722-01-5	25287.7	9896.19	49676.5	130504	139911	173653	1.25253	0.00251262	0.0554158	5.23294	2.38762	up
D264	GC-MS	C10H18	1,6-Octadiene, 3,7-dimethyl-	3,7-二甲基辛基-1,6-二烯	Terpenoids	萜类	-	-	2436-90-0	247257	28424.9	706508	2.4087e+06	2.08045e+06	2.28391e+06	1.13329	0.00376279	0.0599359	6.89588	2.78574	up
w09	GC-MS	C10H18	2,6-Octadiene, 2,6-dimethyl-	2,6-二甲基-2,6-辛二烯	Hydrocarbons	烃类	-	-	2792-39-4	61702.8	39983.1	87366.7	135300	140010	159694	1.24711	0.0124172	0.102557	2.30097	1.20224	up
XMW0202	GC-MS	C10H18	cis-2,6-Dimethyl-2,6-octadiene	顺式-2,6-二甲基-2,6-辛二烯	Hydrocarbons	烃类	-	-	2492-22-0	432015	19679.8	807584	2.87696e+06	2.3485e+06	2.88936e+06	1.06284	0.00173987	0.0470293	6.44402	2.68796	up
XMW0902	GC-MS	C10H18	2,6-Dimethyl-2-trans-6-octadiene	2,6-二甲基-2-反式-6-辛二烯	Terpenoids	萜类	-	-	2609-23-6	1.80638e+06	275292	1.46766e+06	2.90207e+07	2.42061e+07	2.86584e+07	1.33021	0.0018117	0.0477721	23.0706	4.52798	up
D374	GC-MS	C10H18	(-)-trans-Pinane	（-）-反戊烷	Terpenoids	萜类	-	-	33626-25-4	86449.5	50812.9	121828	154057	207903	194319	1.17576	0.0211416	0.125722	2.14705	1.10236	up
XMW0900	GC-MS	C9H14O	3-Cyclohexen-1-one, 3,5,5-trimethyl-	3,5,5-三甲基-3-环己烯-1-酮	Ketone	酮	-	-	471-01-2	272248	67541.7	176521	1.68097e+06	1.74182e+06	1.58835e+06	1.33469	6.09828e-05	0.013679	9.70568	3.27883	up
XMW0008	GC-MS	C9H14O	Isophorone	异佛尔酮	Ketone	酮	-	-	78-59-1	88855.7	52329.2	142089	306321	296411	443372	1.28161	0.0168478	0.11439	3.69291	1.88476	up
NMW0061	GC-MS	C7H7NO2	1-methyl-2-nitro-Benzene	1-甲基-2-硝基苯	Aromatics	芳烃	-	-	88-72-2	9	9	2634.79	6565.37	2080.75	6640.62	1.04391	0.0888827	0.245559	5.76252	2.5267	up
KMW0199	GC-MS	C10H16	.beta.-Myrcene	月桂烯	Terpenoids	萜类	-	-	123-35-3	921185	145485	763550	1.37833e+07	1.17055e+07	1.34622e+07	1.32869	0.000981096	0.0457805	21.2821	4.41157	up
XMW0004	GC-MS	C10H16	Bicyclo[3.1.1]heptane, 6,6-dimethyl-2-methylene-, (1S)-	（1S）-6,6-二甲基-2-亚甲基-双环[3.1.1]庚烷	Terpenoids	萜类	-	-	18172-67-3	8.36138e+06	798770	2.36267e+07	8.22575e+07	7.06719e+07	7.7773e+07	1.12142	0.00332478	0.0598059	7.03643	2.81484	up
XMW0437	GC-MS	C10H16	1,5-Cyclooctadiene, 1,6-dimethyl-	1,6-二甲基-1,5-环辛二烯	Hydrocarbons	烃类	-	-	3760-13-2	131551	39406.5	65485.6	21509.8	33572.1	21396.6	1.13233	0.188977	0.354247	0.323454	-1.62837	down
KMW0172	GC-MS	C10H16	Camphene	莰烯	Terpenoids	萜类	-	-	79-92-5	440801	25606.6	173136	4.29713e+06	1.29875e+07	4.43183e+06	1.27763	0.134208	0.299362	33.9562	5.0856	up
KMW0220	GC-MS	C10H16	3-Carene	δ-3-蒈烯	Terpenoids	萜类	-	-	13466-78-9	7.31226e+07	4.43814e+07	7.50903e+07	2.27752e+08	1.46768e+08	2.13805e+08	1.31385	0.022198	0.126143	3.05473	1.61105	up
XMW0678	GC-MS	C10H16	1,3-Cyclohexadiene, 1,5,5,6-tetramethyl-	1,5,5,6-四甲基-1,3-环己二烯	Terpenoids	萜类	-	-	514-94-3	527384	26724.6	1.06343e+06	2.84708e+06	2.75064e+06	3.98132e+06	1.05159	0.00715653	0.0790032	5.92197	2.56608	up
WMW0023	GC-MS	C10H16	(+)-alpha-Pinene	（+）-α-P烯	Terpenoids	萜类	-	-	7785-70-8	54913.8	8783.88	32732.1	427582	678990	575603	1.32634	0.0160351	0.11397	17.4446	4.1247	up
KMW0217	GC-MS	C10H16	D-Limonene	（+）-柠檬烯	Terpenoids	萜类	-	-	5989-27-5	9117.26	3360.94	7873.56	853738	661181	939975	1.39759	0.0101297	0.0912701	120.623	6.91436	up
KMW0148	GC-MS	C10H16	.alpha.-Pinene	α-蒎烯	Terpenoids	萜类	-	-	80-56-8	335657	59561.4	492384	7.72191e+06	5.99212e+06	7.13876e+06	1.31793	0.00387239	0.0605994	23.4934	4.55418	up
KMW0198	GC-MS	C10H16	.alpha.-Phellandrene 1	（+）-α-芹烯1	Terpenoids	萜类	-	-	99-83-2	7.30914e+07	4.43653e+07	7.50602e+07	2.27707e+08	1.46733e+08	2.13754e+08	1.31388	0.022201	0.126143	3.05529	1.61131	up
XMW0416	GC-MS	C10H16	1,3-Cyclohexadiene, 5-butyl-	5-丁基-1,3-环己二烯	Hydrocarbons	烃类	-	-	30168-57-1	8.69193e+06	1.95149e+06	5.30775e+06	6.49968e+07	6.64091e+07	6.24973e+07	1.33941	6.9807e-05	0.0138373	12.1561	3.6036	up
KMW0223	GC-MS	C10H16	1,3-Cyclohexadiene, 1-methyl-4-(1-methylethyl)-	α-萜类品烯	Terpenoids	萜类	-	-	99-86-5	4.66699e+06	2.73171e+06	4.9762e+06	1.86577e+07	1.03803e+07	1.70474e+07	1.30901	0.0391446	0.162411	3.7241	1.89689	up
XMW0521	GC-MS	C10H16	1,7-Octadiene, 2-methyl-6-methylene-	2-甲基-6-亚甲基-1,7-辛二烯	Terpenoids	萜类	-	-	1686-30-2	58877.5	3806.76	103541	359062	292402	363766	1.08384	0.00188308	0.048687	6.10757	2.6106	up
XMW0709	GC-MS	C10H16	Cyclohexane, 1-methylene-4-(1-methylethenyl)-	1-亚甲基-4-（1-甲基乙烯基）-环己烷	Terpenoids	萜类	-	-	499-97-8	7.30897e+07	4.43644e+07	7.50602e+07	2.27707e+08	1.46733e+08	2.13754e+08	1.31388	0.0222006	0.126143	3.05533	1.61133	up
XMW0023	GC-MS	C10H16	4-methyl-1-(1-methylethyl)-Bicyclo[3.1.0]hex-2-ene	4-甲基-1-（1-甲基乙基）-双环[3.1.0]己-2-烯	Hydrocarbons	烃类	-	-	28634-89-1	442806	24729.9	173710	4.32324e+06	1.30208e+07	4.47439e+06	1.27586	0.133156	0.29862	34.0251	5.08853	up
KMW0235	GC-MS	C10H16	1,3,6-Octatriene, 3,7-dimethyl-, (Z)-	（Z）-BETA-辛二烯	Terpenoids	萜类	-	-	3338-55-4	2.60142e+07	5.90303e+06	1.58885e+07	1.71624e+08	1.70804e+08	1.6593e+08	1.33353	0.000610989	0.0419233	10.6338	3.41059	up
D316	GC-MS	C10H16	Adamantane	金刚烷	Hydrocarbons	烃类	-	-	281-23-2	1.26745e+06	402589	625629	292045	259142	422465	1.00987	0.228404	0.399394	0.424126	-1.23744	down
XMW0452	GC-MS	C10H16	2,4,6-Octatriene, 3,4-dimethyl-	3,4-二甲基-2,4,6-辛三烯	Hydrocarbons	烃类	-	-	57396-75-5	3.25289e+06	1.0075e+06	1.4573e+06	261749	266975	386509	1.28965	0.144281	0.307523	0.16007	-2.64322	down
XMW0632	GC-MS	C10H16	Bicyclo[3.1.1]hept-2-ene, 3,6,6-trimethyl-	3,6,6-三甲基-双环[3.1.1]庚-2-烯	Terpenoids	萜类	-	-	4889-83-2	8.35593e+06	801583	2.36265e+07	8.21551e+07	7.05491e+07	7.76989e+07	1.12154	0.00332623	0.0598059	7.0279	2.81309	up
WMW0215	GC-MS	C10H16	.beta.-Ocimene	β-奥西米尼	Terpenoids	萜类	-	-	13877-91-3	2.60142e+07	5.90303e+06	1.58885e+07	1.71369e+08	1.70688e+08	1.65662e+08	1.33345	0.000600647	0.0419233	10.6205	3.40877	up
WMW0201	GC-MS	C10H16	Bicyclo[2.2.1]heptane, 7,7-dimethyl-2-methylene-	7,7-二甲基-2-亚甲基-双环[2.2.1]庚烷	Terpenoids	萜类	-	-	471-84-1	8.33696e+06	799609	2.35888e+07	8.18167e+07	7.03675e+07	7.73969e+07	1.12123	0.00341568	0.0599359	7.01538	2.81052	up
XMW1064	GC-MS	C8H12N2	1,4-Methano-1H-Cyclopropa[d]pyridazine, 4,4a,5,5a-tetrahydro-6,6-dimethyl-, (1.alpha.,4.alpha.,4a.alpha.,5a.alpha.)-	（1α，4α，4aα，5a.α 。）-4,4a，5,5a-四氢-6,6-二甲基-1,4-甲基-1H-环丙[d]哒嗪	Heterocyclic compound	杂环化合物	-	-	109746-10-3	560888	363438	1.1313e+06	1.93533e+06	1.38696e+06	2.32379e+06	1.17474	0.0294713	0.146046	2.74665	1.45767	up
D414	GC-MS	C9H12O	Bicyclo[3.1.0]hex-3-en-2-one, 5-(1-methylethyl)-	脱氢沙棘酮	Ketone	酮	-	-	36262-12-1	9.52927e+06	3.0024e+06	4.34754e+06	1.06899e+06	1.01787e+06	1.48726e+06	1.25443	0.154885	0.321329	0.211747	-2.23959	down
WMW0081	GC-MS	C9H12O	cis-2-(2-Pentenyl)furan	顺-2-（2-戊烯基）呋喃	Heterocyclic compound	杂环化合物	-	-	70424-13-4	2.6972e+06	1.57616e+06	2.77355e+06	1.04831e+07	5.86907e+06	9.59924e+06	1.31141	0.0389029	0.162411	3.68267	1.88075	up
XMW0603	GC-MS	C9H12O	Benzene, 1-ethyl-4-methoxy-	1-乙基-4-甲氧基-苯	Aromatics	芳烃	-	-	1515-95-3	3.27956e+06	1.00553e+06	1.47505e+06	336561	339248	478553	1.25845	0.156557	0.321729	0.200405	-2.31901	down
XMW1318	GC-MS	C8H8O2	2-Methyl-3(2-furyl)acrolein	2-甲基-3（2-呋喃基）丙烯醛	Heterocyclic compound	杂环化合物	-	-	874-66-8	1.26976e+06	408743	630639	291930	259142	422142	1.02009	0.223642	0.395027	0.421461	-1.24653	down
XMW1063	GC-MS	C4H4N6	4,4'-Bitriazolyl	4,4'-双氮唑基	Heterocyclic compound	杂环化合物	-	-	16227-15-9	1.2745e+06	908902	1.24755e+06	6.27891e+06	1.71091e+06	4.2022e+06	1.15586	0.156502	0.321729	3.55355	1.82926	up
NMW0176	GC-MS	C8H9NO	Benzeneacetamide	苯乙酰胺	Amine	胺	-	-	103-81-1	1.55199e+07	5.39386e+07	2.22681e+07	1.55313e+07	8.56253e+06	1.01716e+07	1.03352	0.245003	0.415085	0.37356	-1.42059	down
XMW0366	GC-MS	C10H14	Benzene, 1,2,3,5-tetramethyl-	1,2,3,5-四甲基苯	Aromatics	芳烃	-	-	527-53-7	253764	174256	246737	572211	328810	779780	1.19158	0.118718	0.283904	2.49097	1.31671	up
NMW0794	GC-MS	C10H14	Benzene, (1-methylpropyl)-	（1-甲基丙基）-苯	Aromatics	芳烃	-	-	135-98-8	1.74362e+06	1.0279e+06	1.81471e+06	6.65637e+06	3.75276e+06	6.0769e+06	1.30971	0.0381979	0.161481	3.59468	1.84586	up
KMW0273	GC-MS	C10H14	Benzene, 1,2,4,5-tetramethyl-	杜罗尔	Aromatics	芳烃	-	-	95-93-2	254142	174383	246737	571808	330125	780477	1.19302	0.118156	0.28294	2.49149	1.31701	up
XMW1378	GC-MS	C9H10O	4,6-Octadiyn-3-one, 2-methyl-	2-甲基-4,6-辛二炔-3-酮	Ketone	酮	-	-	29743-33-7	51951.9	15446.8	58335.2	242745	276602	259555	1.29321	0.000323544	0.0384857	6.19485	2.63107	up
XMW0901	GC-MS	C5H7ClO2	3-Chloro-2,4-pentanedione	3-氯-2,4-戊二酮	Halogenated hydrocarbons	卤代烃	-	-	1694-29-7	1456.77	293.843	2164.56	15284.2	12563.9	13335.6	1.27649	0.00046519	0.0418729	10.519	3.39492	up
NMW0010	GC-MS	C10H12	Dicyclopentadiene	双环戊二烯	Terpenoids	萜类	-	-	77-73-6	905677	531375	929998	3.30825e+06	1.9164e+06	3.02059e+06	1.3104	0.0346772	0.155085	3.48334	1.80047	up
KMW0219	GC-MS	C8H18O	1-Hexanol, 2-ethyl-	2-乙基己醇	Alcohol	醇	-	-	104-76-7	7369.06	3657.91	8023.05	40193.5	50351.3	44714.6	1.36546	0.00168149	0.0470293	7.10022	2.82786	up
KMW0202	GC-MS	C8H18O	3-Octanol	3-辛醇	Alcohol	醇	-	-	589-98-0	7000.14	1207.6	6343.53	115813	98030.3	116934	1.33475	0.00173347	0.0470293	22.7319	4.50664	up
KMW0194	GC-MS	C8H18O	2-Octanol	2-辛醇	Alcohol	醇	-	-	123-96-6	9259.26	5395.74	9696.53	25066.7	16681.4	22604.3	1.2833	0.0168878	0.11439	2.64264	1.40198	up
KMW0105	GC-MS	C7H14O2	1-Butanol, 3-methyl-, acetate	乙酸异戊酯	Ester	酯	-	-	123-92-2	2578.49	656.764	6689.52	10140.7	9749.26	18022.8	1.0839	0.0530166	0.189683	3.82001	1.93358	up
KMW0137	GC-MS	C9H20	Nonane	壬烷	Hydrocarbons	烃类	-	-	111-84-2	20697.2	7614.83	25489.8	54321.3	35996.4	52591.5	1.13665	0.0201916	0.124232	2.65622	1.40937	up
WMW0058	GC-MS	C8H16O	5-Hepten-2-ol, 6-methyl-	6-甲基-5-庚-2-醇	Alcohol	醇	-	-	1569-60-4	236813	71882	183127	3.71858e+06	3.07289e+06	3.64601e+06	1.37363	0.00249391	0.0554158	21.222	4.40749	up
XMW0578	GC-MS	C8H16O	Furan, 2-butyltetrahydro-	2-丁基四氢-呋喃	Heterocyclic compound	杂环化合物	-	-	1004-29-1	64409.7	31527.4	58331.8	159520	101195	150818	1.24834	0.0237972	0.130629	2.66764	1.41556	up
KMW0187	GC-MS	C8H16O	2-Octanone	2-辛酮	Ketone	酮	-	-	111-13-7	28874.8	17251.8	29228	102299	59556.8	95455.9	1.31145	0.0357273	0.156245	3.41468	1.77175	up
w01	GC-MS	C8H16O	Cyclooctyl Alcohol	环辛醇	Alcohol	醇	-	-	696-71-9	15948.2	6165.8	27200.8	128136	107838	149101	1.30779	0.00369084	0.0599359	7.80853	2.96505	up
NMW0782	GC-MS	C7H12O2	2-Butenoic acid, 2-methyl-, ethyl ester	2-甲基2-丁酸乙酯	Ester	酯	-	-	55514-48-2	4430.91	3611.46	7166.96	43122.8	31203.8	35985.3	1.37334	0.0072915	0.0793172	7.25291	2.85856	up
KMW0207	GC-MS	C6H8OS	2-Furanmethanethiol, 5-methyl-	甲基糠基硫醇	Heterocyclic compound	杂环化合物	-	-	59303-05-8	236813	71972.6	183127	3.71858e+06	3.07468e+06	3.66012e+06	1.37374	0.00253674	0.0554158	21.2505	4.40942	up
w41	GC-MS	C8H14O	3-Octen-2-one, (E)-	（E）-3-辛烯酮	Ketone	酮	-	-	18402-82-9	1687.05	152.291	3078.23	2.57492e+06	1.99404e+06	2.84173e+06	1.37185	0.0101196	0.0912701	1506.98	10.5574	up
KMW0230	GC-MS	C8H14O	3-Octen-2-one	3-辛烯-2-酮	Ketone	酮	-	-	1669-44-9	637271	152859	411051	4.27286e+06	4.41108e+06	4.12873e+06	1.33721	9.85504e-05	0.0167396	10.6667	3.41505	up
KMW0168	GC-MS	C8H14O	5-Methyl-(E)-2-hepten-4-one	5-甲基-2-庚-4-酮	Ketone	酮	-	-	102322-83-8	59789.5	40830.9	92834.4	124145	142460	147191	1.20872	0.0249364	0.133996	2.13898	1.09693	up
KMW0170	GC-MS	C8H14O	1-Octen-3-one	辛烯酮	Ketone	酮	-	-	4312-99-6	86598.9	50814.4	123014	175769	208977	213338	1.21174	0.0161262	0.114056	2.29654	1.19946	up
XMW0028	GC-MS	C8H15N	Pyridine, 2,3,4,5-tetrahydro-6-propyl-	2,3,4,5-四氢-6-丙基-吡啶	Heterocyclic compound	杂环化合物	-	-	1604-01-9	9	9	9	46244.2	36123.7	51260.3	1.40949	0.00984476	0.0911279	4949.19	12.273	up
XMW1124	GC-MS	C7H11NO	2-Azabicyclo[3.2.1]octan-3-one	2-氮杂双环[3.2.1] 辛烷-3-酮	Ketone	酮	-	-	26396-67-8	3144.8	9	5191.07	777336	600695	847257	1.22685	0.00968956	0.0911279	266.665	8.05889	up
WMW0099	GC-MS	C9H16	Cyclopentene, 1-butyl-	1-丁基-环戊烯	Hydrocarbons	烃类	-	-	2423-01-0	439135	51928.7	1.25182e+06	4.32881e+06	3.72437e+06	4.07648e+06	1.13717	0.00342968	0.0599359	6.95953	2.79899	up
WMW0126	GC-MS	C9H16	1,3-Hexadiene, 3-ethyl-2-methyl-	3-乙基-2-甲基-1,3-己二烯	Hydrocarbons	烃类	-	-	61142-36-7	17411.5	4531.42	24106	5.13658e+06	3.95387e+06	5.59916e+06	1.38834	0.00991518	0.0911279	319	8.31741	up
XMW0289	GC-MS	C7H8O2	2-Acetyl-5-methylfuran	2-乙酰基-5-甲基呋喃	Heterocyclic compound	杂环化合物	-	-	1193-79-9	308409	182616	247887	1.66412e+06	1.71934e+06	1.61158e+06	1.39251	9.52231e-06	0.00627224	6.75999	2.75702	up
KMW0258	GC-MS	C7H8O2	2-methoxy-Phenol	愈创木酚	Phenol	酚	-	-	90-05-1	201852	52928	222932	745770	760983	1.04582e+06	1.25362	0.00759794	0.0805603	5.34333	2.41774	up
XMW1229	GC-MS	C9H14	Bicyclo(3.3.1)non-2-ene	双环（3.3.1）非-2-烯	Hydrocarbons	烃类	-	-	6671-66-5	41249.4	4514.59	19655.6	377455	1.137e+06	401333	1.30245	0.131566	0.297482	29.2847	4.87207	up
KMW0183	GC-MS	C7H10N2	Pyrazine, 2-ethyl-5-methyl-	乙基甲基吡嗪	Heterocyclic compound	杂环化合物	-	-	13360-64-0	4.6634e+06	2.73261e+06	4.97177e+06	1.86524e+07	1.03772e+07	1.70424e+07	1.30923	0.0391643	0.162411	3.72516	1.8973	up
KMW0190	GC-MS	C7H10N2	Pyrazine, trimethyl-	三甲基吡嗪	Heterocyclic compound	杂环化合物	-	-	14667-55-1	756041	468313	780515	2.44346e+06	1.52995e+06	2.28334e+06	1.31546	0.0265509	0.138905	3.12078	1.64191	up
KMW0192	GC-MS	C8H10O	Benzene, 1-methoxy-2-methyl-	2-甲基苯甲醚	Aromatics	芳烃	-	-	578-58-5	493110	292138	535694	1.96002e+06	1.07603e+06	1.79808e+06	1.3041	0.0416074	0.16422	3.65961	1.87169	up
WMW0085	GC-MS	C4H10S2	Diethyl diSulfur compounds	二乙基二硫	Sulfur compounds	含硫化合物	-	-	110-81-6	2816	827.135	2223.9	13097.2	18342.6	19122.8	1.33371	0.0103038	0.0923719	8.61808	3.10737	up
XMW0522	GC-MS	C8H11N	Pyridine, 3-propyl-	3-丙基吡啶	Heterocyclic compound	杂环化合物	-	-	4673-31-8	954642	45970.3	1.85975e+06	7.06019e+06	5.70013e+06	7.05909e+06	1.07781	0.00133652	0.0460721	6.92898	2.79264	up
XMW1385	GC-MS	C6H7N3	3-Imidazol-1-ylpropanenitrile	3-咪唑-1-基丙腈	Heterocyclic compound	杂环化合物	-	-	23996-53-4	499429	183648	845330	4.31296e+06	3.63885e+06	5.13087e+06	1.31007	0.00522103	0.0679878	8.55968	3.09756	up
XMW0711	GC-MS	C7H7NO	Formamide, N-phenyl-	N-苯基-甲酰胺	Aromatics	芳烃	-	-	103-70-8	111119	78187.3	220218	374362	262868	444247	1.17897	0.0320715	0.151154	2.64081	1.40098	up
NMW0789	GC-MS	C9H12	Benzene, 1-ethyl-3-methyl-	1-乙基-3-甲基-苯	Aromatics	芳烃	-	-	620-14-4	34734.5	919.632	13255.5	357959	1.08256e+06	365355	1.23998	0.134842	0.30019	36.9227	5.20643	up
NMW0012	GC-MS	C9H12	Benzene, 1,2,3-trimethyl-	1,2,3-三甲基苯	Aromatics	芳烃	-	-	526-73-8	83543.3	41113.7	100275	242990	278820	249055	1.29604	0.00197884	0.0504321	3.4271	1.77699	up
KMW0150	GC-MS	C9H12	Benzene, 1,2,4-trimethyl-	甲基对二甲苯	Aromatics	芳烃	-	-	95-63-6	331920	48408.7	263681	5.87025e+06	4.77019e+06	5.67875e+06	1.33158	0.00267495	0.0561424	25.3399	4.66334	up
KMW0169	GC-MS	C5H12OS	3-Mercapto-3-methylbutanol	巯基甲基丁醇	Sulfur compounds	含硫化合物	-	-	34300-94-2	40347.1	32517.3	75049	105253	126243	125712	1.23445	0.0175293	0.115665	2.41498	1.27201	up
NMW0777	GC-MS	C4H8S2	DiSulfur compounds, methyl 2-propenyl	二硫化二甲基2-丙烯基	Sulfur compounds	含硫化合物	-	-	2179-58-0	16765.6	2504.4	28710.2	77328.4	60164.6	68787.2	1.09838	0.00676381	0.0771342	4.29928	2.10409	up
NMW0774	GC-MS	C6H14O2	Ethanol, 2-butoxy-	2-丁氧基乙醇	Alcohol	醇	-	-	111-76-2	20354.4	8655.42	25744.3	52834	35554.9	52619.4	1.15763	0.020197	0.124232	2.5753	1.36474	up
NMW0011	GC-MS	C8H6O	Benzofuran	苯并呋喃	Heterocyclic compound	杂环化合物	-	-	271-89-6	53877.2	31005.2	55907.6	215134	119743	194041	1.3108	0.0385175	0.161683	3.75678	1.9095	up
KMW0159	GC-MS	C7H16O	1-Heptanol	1-庚醇	Alcohol	醇	-	-	111-70-6	45418.6	37154.4	88863.6	121601	132623	143037	1.21233	0.0298392	0.146245	2.31725	1.21241	up
XMW0310	GC-MS	C6H12O2	2H-Pyran-2-methanol, tetrahydro-	四氢-2H-吡喃-2-甲醇	Heterocyclic compound	杂环化合物	-	-	100-72-1	9660.51	7099.71	13381.6	34899.8	33789.1	35020.5	1.35219	0.00403858	0.0615797	3.44071	1.78271	up
KMW0167	GC-MS	C5H8OS	3(2H)-Thiophenone, dihydro-2-methyl-	甲基二氢噻吩酮	Heterocyclic compound	杂环化合物	-	-	13679-85-1	6291.49	3971.71	6635.52	20860.4	12909.2	18539.7	1.31558	0.0270122	0.139885	3.09546	1.63015	up
XMW0291	GC-MS	C5H9NO2	N-Acetylisoxazolidine	N-乙酰乙二唑烷	Heterocyclic compound	杂环化合物	-	-	115615-36-6	4125.17	839.723	6437.22	76933.2	58132.6	69737.6	1.31084	0.00424157	0.0625369	17.9619	4.16687	up
KMW0152	GC-MS	C5H9NS	Butane, 1-isothiocyanato-	异硫氰酸丁酯	Ester	酯	-	-	592-82-5	3496.68	9	726.519	26015.2	81056	26541.7	1.13167	0.14158	0.304679	31.5706	4.98051	up
D372	GC-MS	C7H14O	2-Hepten-1-ol, (E)-	（E）-2-庚-1-醇	Alcohol	醇	-	-	33467-76-4	36332.2	32779.7	69116.7	116553	116690	124021	1.27423	0.0203697	0.124232	2.58459	1.36994	up
WMW0103	GC-MS	C7H14O	2-Cyclopentylethanol	2-环戊基乙醇	Alcohol	醇	-	-	766-00-7	6.08321e+06	3.65505e+06	6.2155e+06	2.12923e+07	1.26612e+07	1.96356e+07	1.31357	0.0322423	0.151154	3.35902	1.74804	up
D350	GC-MS	C6H10O2	2-Pentenoic Acid, 2-methyl-	2-甲基-2-戊烯酸	Acid	酸	-	-	3142-72-1	39911	31063.1	71872.8	96263.7	112852	124506	1.22215	0.017401	0.115537	2.33552	1.22374	up
XMW0488	GC-MS	C6H11NO	2-Acetylpyrrolidine	2-乙酰基吡咯烷	Heterocyclic compound	杂环化合物	-	-	60026-20-2	73312.6	22874.6	49418.8	412445	423050	396634	1.34868	0.000192262	0.0265042	8.46207	3.08101	up
D378	GC-MS	C5H7NS	1-Butene, 4-isothiocyanato-	4-异硫氰酸根丁-1-烯	Sulfur compounds	含硫化合物	-	-	3386-97-8	13482.1	9820.35	22813.6	28921.2	40425.7	29782.8	1.1719	0.0299792	0.146355	2.14957	1.10405	up
D373	GC-MS	C7H12O	2,4-Heptadien-1-ol, (E,E)-	（E，E）-2,4-庚二烯-1-醇	Alcohol	醇	-	-	33467-79-7	1.0298e+07	6.13878e+06	1.04745e+07	3.72101e+07	2.18563e+07	3.42489e+07	1.31512	0.0334171	0.153109	3.46751	1.7939	up
XMW1118	GC-MS	C7H12O	CyclohexanecarboxAldehyde	环己烷甲醛	Aldehyde	醛	-	-	2043-61-0	85613.6	51364.9	123588	178744	210284	212426	1.21731	0.0167371	0.11439	2.30826	1.2068	up
KMW0539	GC-MS	C6H8O2	2(5H)-Furanone, 5-ethyl-	乙基呋喃酮	Heterocyclic compound	杂环化合物	-	-	2407-43-4	41736.9	55751.3	106381	172507	193615	219236	1.25548	0.00828381	0.0843356	2.87125	1.52168	up
GMW0039	GC-MS	C5H4O3	2-Furancarboxylic acid	2-呋喃甲酸	Heterocyclic compound	杂环化合物	-	-	88-14-2	66346.9	16357.7	39093.6	8739.14	14926	9748.56	1.12478	0.176311	0.343268	0.274337	-1.86598	down
KMW0136	GC-MS	C6H9NO	2-Acetyl-1-pyrroline	乙酰吡咯啉	Heterocyclic compound	杂环化合物	-	-	85213-22-5	38983.2	21195.6	78326.3	195188	161070	205337	1.25753	0.00335235	0.0598059	4.05469	2.01959	up
XMW1467	GC-MS	C6H10N2	1H-Pyrazole, 1,3,5-trimethyl-	1,3,5-三甲基-1H-吡唑	Heterocyclic compound	杂环化合物	-	-	1072-91-9	44283.9	24286.4	39155.2	3.165e+07	2.4635e+07	3.48823e+07	1.40735	0.0097837	0.0911279	846.293	9.72501	up
XMW0884	GC-MS	C7H10O	5-Hexenal, 4-methylene-	4-亚甲基-5-己烯	Hydrocarbons	烃类	-	-	17844-21-2	51748.4	40548.9	81018.5	895425	749621	909986	1.39191	0.00278012	0.0570085	14.7421	3.88187	up
XMW0910	GC-MS	C5H6N2O	1H-Imidazole, 1-acetyl-	1-乙酰基-1H-咪唑	Heterocyclic compound	杂环化合物	-	-	2466-76-4	209855	24395.4	591479	2.19942e+06	1.88579e+06	2.12016e+06	1.14777	0.002099	0.0520087	7.51502	2.90978	up
KMW0174	GC-MS	C6H6O2	2-FurancarboxAldehyde, 5-methyl-	5-甲基糠醛	Aldehyde	醛	-	-	620-02-0	1.16421e+06	338397	1.16706e+06	1.75094e+06	1.94125e+06	1.80673e+06	1.01768	0.0704133	0.216784	2.05978	1.04249	up
XMW0714	GC-MS	C6H7NO	3-Acetyl-1H-pyrroline	3-乙酰基-1H-吡咯啉	Heterocyclic compound	杂环化合物	-	-	1072-82-8	28701.8	7586.91	34195.8	267318	217616	292790	1.31991	0.00421475	0.0625369	11.034	3.46388	up
KMW0323	GC-MS	C7H8O	Benzyl Alcohol	苯甲醇	Alcohol	醇	-	-	100-51-6	8.40217e+06	1.83461e+06	5.11151e+06	6.46132e+07	6.53801e+07	6.16498e+07	1.33844	6.13406e-05	0.013679	12.4863	3.64227	up
XMW0651	GC-MS	C7H9N	Pyridine, 2,3-dimethyl-	2,3-二甲基吡啶	Heterocyclic compound	杂环化合物	-	-	583-61-9	498644	57274.1	1.3859e+06	4.96876e+06	4.23423e+06	4.68698e+06	1.14	0.00258858	0.0554158	7.15309	2.83857	up
NMW0013	GC-MS	C7H9N	Benzylamine	苄胺	Aromatics	芳烃	-	-	100-46-9	30040.4	14059.2	35290.2	143778	168406	136423	1.33947	0.000916277	0.0457805	5.65068	2.49842	up
XMW0114	GC-MS	C6H5NO	Benzene, nitroso-	亚硝基苯	Aromatics	芳烃	-	-	586-96-9	9.27261e+06	5.54288e+06	9.56435e+06	3.29566e+07	1.9558e+07	3.03278e+07	1.31324	0.0320362	0.151154	3.39799	1.76468	up
KMW0070	GC-MS	C8H10	Benzene, 1,3-dimethyl-	间二甲苯	Aromatics	芳烃	-	-	108-38-3	8053.97	11679.8	14789.3	32650.9	39881.8	39445.3	1.34341	0.00122305	0.0458236	3.24357	1.69758	up
KMW0160	GC-MS	C4H10OS	1-Propanol, 3-(methylthio)-	3-（甲硫基）-1-丙醇	Alcohol	醇	-	-	505-10-2	1.21107e+06	397558	953618	2.49428e+06	2.99592e+06	2.48377e+06	1.23087	0.00502785	0.0672262	3.1121	1.63789	up
KMW0158	GC-MS	C7H6O	BenzAldehyde	苯甲醛	Aldehyde	醛	-	-	100-52-7	80277.4	5982.28	35365.1	747572	2.30096e+06	778667	1.28421	0.137354	0.301823	31.4673	4.97578	up
KMW0426	GC-MS	C7H5N	Benzonitrile	氰化苯	Aromatics	芳烃	-	-	100-47-0	91059.2	3377.69	164505	625008	494020	612334	1.05467	0.00149447	0.0469042	6.68631	2.74121	up
XMW1116	GC-MS	C6H12O	4-Hexen-1-ol, (E)-	（E）-4-己烯-1-醇	Alcohol	醇	-	-	928-92-7	25929.7	10090.2	52752.5	124612	104110	147797	1.20987	0.00565551	0.0700655	4.2414	2.08454	up
NMW0790	GC-MS	C5H8O2	2H-Pyran-2-one, tetrahydro-	四氢-2H-吡喃-2-酮	Ketone	酮	-	-	542-28-9	4096.06	2292.11	4544.59	27207.9	78405.8	28450.9	1.33419	0.135119	0.30019	12.2627	3.6162	up
XMW0710	GC-MS	CH4N6	1H-Tetrazole-1,5-diAmine	1H-四唑-1,5-二胺	Amine	胺	-	-	2165-21-1	8.41214e+07	4.18958e+07	1.06979e+08	4.53434e+07	3.19753e+07	3.76488e+07	1.03817	0.17068	0.338119	0.493431	-1.01908	down
XMW1120	GC-MS	C4H5NS	Thiocyanic acid, 2-propenyl ester	硫氰酸烯丙酯	Ester	酯	-	-	764-49-8	15860.3	5059.05	23955.7	53311	31517.8	43706	1.0939	0.0297125	0.146245	2.86429	1.51818	up
XMW1115	GC-MS	C6H10O	Isopropenyl ethyl ketone	异丙烯基乙基酮	Ketone	酮	-	-	25044-01-3	22891.5	5183.68	28126.2	141899	134189	140279	1.27047	0.001447	0.0469042	7.40847	2.88918	up
XMW0444	GC-MS	C2H3N5	1,2,4,5-Tetrazin-3-Amine	1,2,4,5-替他嗪-3-胺	Amine	胺	-	-	79329-74-1	8087.94	8784.26	20287.1	27602.4	29813.5	31631.6	1.19637	0.0394901	0.162411	2.39637	1.26085	up
NMW0059	GC-MS	C5H6N2	4-Aminopyridine	4-氨基吡啶	Heterocyclic compound	杂环化合物	-	-	504-24-5	97356.5	45700.8	151976	1.24161e+06	1.92426e+06	1.64254e+06	1.3643	0.015151	0.113068	16.2978	4.02661	up
XMW0076	GC-MS	C5H4N2	1H-Pyrrole-3-carbonitrile	1H-吡咯-3-腈	Heterocyclic compound	杂环化合物	-	-	7126-38-7	7.38685e+06	1.6355e+06	4.48656e+06	6.20291e+07	6.35131e+07	5.96484e+07	1.34396	2.73516e-05	0.00813253	13.7088	3.77703	up
KMW0048	GC-MS	C5H12O	1-Butanol, 3-methyl-	3-甲基-1-丁醇	Alcohol	醇	-	-	123-51-3	123507	27849.9	166350	741599	717820	678251	1.25109	0.00127937	0.0460721	6.72843	2.75027	up
KMW0051	GC-MS	C5H12O	1-Butanol, 2-methyl-	2-甲基-1-丁醇	Alcohol	醇	-	-	137-32-6	7277.23	1180.84	10621.6	29865.6	44303.1	46346.3	1.18892	0.00996073	0.0911279	6.31641	2.6591	up
XMW1224	GC-MS	C2H4N2O2	Ethanediamide	乙二酰胺	Amine	胺	-	-	471-46-5	13472.6	4611.52	6239.65	43120.5	39581.3	46927.1	1.32859	0.000704378	0.0448789	5.32932	2.41395	up
XMW0908	GC-MS	C2H4N2O2	1,2-HydrazinedicarboxAldehyde	1,2-肼二甲醛	Aldehyde	醛	-	-	628-36-4	2334.53	969.091	1689.38	28598.8	22794.3	27043.8	1.38575	0.00350812	0.0599359	15.7094	3.97355	up
NMW0771	GC-MS	C4H9NO	N,N-Dimethylacetamide	N，N-二甲基乙酰胺	Amine	胺	-	-	127-19-5	3196.53	4755.79	13854.1	45490.8	40334.7	42148.3	1.28157	0.00312422	0.0593941	5.86864	2.55303	up
XMW0042	GC-MS	C2H3N3O	3H-1,2,4-Triazol-3-one, 1,2-dihydro-	1,2-二氢-3H-1,2,4-三唑-3-酮	Heterocyclic compound	杂环化合物	-	-	930-33-6	6757.26	2656.33	10227	20214	12258.3	12744.1	1.03672	0.0667484	0.210016	2.30219	1.203	up
XMW0573	GC-MS	C4H8N2	1,5-Diazabicyclo[3.1.0]hexane	1,5-二氮杂双环[3.1.0]己烷	Heterocyclic compound	杂环化合物	-	-	13090-31-8	4701.84	3939.12	14488	182709	146686	219006	1.36461	0.0122281	0.101957	23.7106	4.56746	up
KMW0047	GC-MS	C5H8O	2-Butenal, 2-methyl-	甲基-2-丁烯醛	Aldehyde	醛	-	-	1115-11-3	124234	23479.2	172526	741651	719353	781297	1.23311	0.00158835	0.0469042	7.00195	2.80776	up
NMW0776	GC-MS	C4H4O2	2(5H)-Furanone	2（5H）-呋喃酮	Ketone	酮	-	-	497-23-4	19795.8	9607.62	40625.8	83679.1	72453.8	99601.6	1.21428	0.00721834	0.0790032	3.65182	1.86862	up
XMW0132	GC-MS	C5H9N	Pyridine, 2,3,4,5-tetrahydro-	2,3,4,5-四氢吡啶	Heterocyclic compound	杂环化合物	-	-	505-18-0	126603	28545.3	162316	723585	673750	736156	1.25564	0.00107375	0.0458236	6.72041	2.74855	up
XMW1208	GC-MS	CH2N4	1H-Tetrazole	1H-四唑	Heterocyclic compound	杂环化合物	-	-	288-94-8	17445.6	5768.47	19227.5	56616.7	60786.2	59322.8	1.26112	0.00551663	0.0693368	4.16397	2.05796	up
