# Supplementary material for: Metabolomics Analysis Reveals the Differences Between Bupleurum chinense DC. and Bupleurum scorzonerifolium Willd
Source: Front Plant Sci. 2022 Jul 13;13:933849. doi: 10.3389/fpls.2022.933849 (PMC9328751; doi:10.3389/fpls.2022.933849)
Supplement: Supplementary file 6 [file Table_6.XLSX]

## Sheet: Sheet1
Index	Platform	Formula	Compounds	物质	Class I	物质一级分类	Class II	物质二级分类	CAS	BcR1	BcR2	BcR3	BcF1	BcF2	BcF3	VIP	p_value	FDR	Fold_Change	Log2FC	Type
pmb0782	UPLC-MS/MS	C5H11N	Piperidine	哌啶	Alkaloids	生物碱	Alkaloids	生物碱	110-89-4	2099000	1989700	5159400	7414700	9038700	11121000	1.0707	0.0149942	0.121219	2.98163	1.5761	up
Lmbn000193	UPLC-MS/MS	C3H4O4	Tartronate semialdehyde	羟基丙二酸半醛	Organic acids	有机酸	Organic acids	有机酸	2480-77-5	6171600	6391500	6303400	873880	813340	1878700	1.17305	0.00358078	0.0868581	0.189008	-2.40348	down
ML10172161	UPLC-MS/MS	C3H4O4	Hydroxypyruvic acid	羟基丙酮酸	Organic acids	有机酸	Organic acids	有机酸	1113-60-6	8083500	9065900	8410200	1215900	1182400	2675000	1.16913	0.000871826	0.0601896	0.198489	-2.33287	down
mws0574	UPLC-MS/MS	C4H8O3	2-Hydroxyisobutyric acid	2-羟基异丁酸	Organic acids	有机酸	Organic acids	有机酸	594-61-6	58468	35737	83180	378620	297310	401890	1.17803	0.00462085	0.0906345	6.07616	2.60316	up
mws0576	UPLC-MS/MS	C4H8O3	3-Hydroxybutyric acid	3-羟基丁酸	Organic acids	有机酸	Organic acids	有机酸	300-85-6	41316000	45844000	41328000	6008400	5113200	13718000	1.15752	0.00132677	0.0701746	0.193322	-2.37092	down
pme1975	UPLC-MS/MS	C3H4O4	Malonic acid	丙二酸	Organic acids	有机酸	Organic acids	有机酸	141-82-2	33789000	38126000	32601000	4020200	3949000	11193000	1.1469	0.00107332	0.0679322	0.183342	-2.44739	down
MWS2076	UPLC-MS/MS	C6H7NO	2-Aminophenol	2-氨基苯酚	Alkaloids	生物碱	Alkaloids	生物碱	95-55-6	7209.5	2925.6	5035.4	59052	84752	41849	1.18472	0.043691	0.149953	12.2378	3.61327	up
MWS5173	UPLC-MS/MS	C4H5N3O	Isocytosine	异胞嘧啶	Nucleotides and derivatives	核苷酸及其衍生物	Nucleotides and derivatives	核苷酸及其衍生物	108-53-2	171250	169290	581110	22746	53585	79479	1.03028	0.201865	0.285989	0.169055	-2.56443	down
mws0255	UPLC-MS/MS	C4H5N3O	Cytosine	胞嘧啶	Nucleotides and derivatives	核苷酸及其衍生物	Nucleotides and derivatives	核苷酸及其衍生物	71-30-7	470170	483860	371180	916000	1642000	1714800	1.14402	0.0586697	0.162558	3.22424	1.68896	up
MWStz040	UPLC-MS/MS	C5H9NO2	Pterolactam	蕨内酰胺	Alkaloids	生物碱	Pyrrole alkaloids	吡咯类生物碱	38072-88-7	213020	126850	144420	1168600	2411900	921060	1.17335	0.100519	0.197257	9.29517	3.21648	up
pme0006	UPLC-MS/MS	C5H9NO2	L-Proline	L-脯氨酸	Amino acids and derivatives	氨基酸及其衍生物	Amino acids and derivatives	氨基酸及其衍生物	147-85-3	308720	193780	235050	1582800	3125800	1266400	1.1751	0.092833	0.191416	8.10115	3.01813	up
mws0256	UPLC-MS/MS	C5H11NO2	L-Valine	L-缬氨酸	Amino acids and derivatives	氨基酸及其衍生物	Amino acids and derivatives	氨基酸及其衍生物	72-18-4	5191100	3823000	5805800	9683800	9043300	12289000	1.12784	0.0154256	0.121231	2.09287	1.06548	up
pme0120	UPLC-MS/MS	C5H11NO2	5-Aminovaleric acid	5-氨基戊酸	Organic acids	有机酸	Organic acids	有机酸	660-88-8	30729	15205	34426	87779	73868	61161	1.08692	0.00947191	0.119733	2.77262	1.47125	up
pmp001287	UPLC-MS/MS	C8H9N	N-Benzylmethylene isomethylamine	N-苯亚甲基异甲胺	Alkaloids	生物碱	Alkaloids	生物碱	-	2132800	1596900	3363100	6272900	6712800	6432300	1.133	0.0120329	0.120616	2.73771	1.45297	up
pme0195	UPLC-MS/MS	C3H7NO2S	L-Cysteine	L-半胱氨酸	Amino acids and derivatives	氨基酸及其衍生物	Amino acids and derivatives	氨基酸及其衍生物	52-90-4	20957	9165.7	111150	9	9	9	1.2054	0.281311	0.36068	0.00019112	-12.3532	down
mws0491	UPLC-MS/MS	C8H11N	Phenethylamine	2-苯乙胺	Alkaloids	生物碱	Alkaloids	生物碱	64-04-0	57654	53674	48118	478330	402540	248520	1.19959	0.0408511	0.146313	7.08321	2.8244	up
mws0628	UPLC-MS/MS	C7H6O2	4-Hydroxybenzaldehyde	对羟基苯甲醛	Phenolic acids	酚酸类	Phenolic acids	酚酸类	123-08-0	66830	61686	132520	297520	195720	447080	1.08205	0.0789326	0.181367	3.60226	1.8489	up
mws0133	UPLC-MS/MS	C6H6N2O	Nicotinamide	烟酰胺	Others	其它类	Vitamin	维生素	98-92-0	602150	427340	669370	1581300	2427100	1831800	1.17456	0.0242531	0.130844	3.43772	1.78145	up
Lmbp000668	UPLC-MS/MS	C6H5NO2	Isonicotinic acid	异烟酸	Others	其它类	Vitamin	维生素	55-22-1	369810	208650	471540	1865900	1322200	2393100	1.15426	0.0331628	0.132283	5.31543	2.41019	up
pme0490	UPLC-MS/MS	C6H5NO2	Nicotinic acid (Vitamin B3)	烟酸 (维生素 B3)	Others	其它类	Vitamin	维生素	59-67-6	346910	201390	438560	1747500	1288200	2188800	1.16243	0.0258227	0.130844	5.29406	2.40438	up
pme1216	UPLC-MS/MS	C6H5NO2	2-Picolinic acid	2-吡啶甲酸	Organic acids	有机酸	Organic acids	有机酸	98-98-6	55632	46126	111620	645940	541820	1091400	1.17794	0.0530989	0.157647	10.6813	3.41702	up
MWS2027	UPLC-MS/MS	C4H4N2O3	Barbituric acid;Malonylurea;2,4,6-Pyrimidinetrione	巴比妥酸;丙二酰脲;2,4,6-嘧啶三酮	Nucleotides and derivatives	核苷酸及其衍生物	Nucleotides and derivatives	核苷酸及其衍生物	67-52-7	2264100	1813500	3341200	377300	141060	359380	1.16429	0.0374233	0.138505	0.118313	-3.07932	down
ML10181668	UPLC-MS/MS	C6H11NO2	Cycloleucine	环亮氨酸	Amino acids and derivatives	氨基酸及其衍生物	Amino acids and derivatives	氨基酸及其衍生物	52-52-8	49436	77806	105460	209800	285070	146170	1.06972	0.06139	0.164118	2.75477	1.46193	up
pme2693	UPLC-MS/MS	C6H14N2O	N-Acetylputrescine	N-乙酰腐胺	Alkaloids	生物碱	Phenolamine	酚胺	18233-70-0	15892	2561.5	16659	245830	194180	281150	1.14308	0.0101078	0.120327	20.5386	4.36026	up
mws0216	UPLC-MS/MS	C5H9NO3	Trans-4-Hydroxy-L-proline	反-4-羟基-L-脯氨酸	Amino acids and derivatives	氨基酸及其衍生物	Amino acids and derivatives	氨基酸及其衍生物	51-35-4	2938900	3803800	8507400	11258000	10375000	17915000	1.0037	0.0566602	0.160789	2.59329	1.37479	up
MWS1926	UPLC-MS/MS	C6H13NO2	DL-Leucine	DL-亮氨酸	Amino acids and derivatives	氨基酸及其衍生物	Amino acids and derivatives	氨基酸及其衍生物	328-39-2	2380800	3352900	6731300	8109900	9527100	9638900	1.00375	0.0506259	0.156015	2.1882	1.12974	up
pme0274	UPLC-MS/MS	C6H13NO2	6-Aminocaproic acid	6-氨基己酸	Organic acids	有机酸	Organic acids	有机酸	60-32-2	2041500	2102500	5354400	7432800	8091200	10582000	1.05068	0.0196334	0.130844	2.74846	1.45863	up
mws1587	UPLC-MS/MS	C6H13NO2	L-Norleucine	L-正亮氨酸	Amino acids and derivatives	氨基酸及其衍生物	Amino acids and derivatives	氨基酸及其衍生物	327-57-1	16429000	16620000	41484000	51810000	64257000	80118000	1.03856	0.0255228	0.130844	2.63219	1.39626	up
pme2679	UPLC-MS/MS	C6H13NO2	L-Allo-isoleucine	L-别异亮氨酸	Amino acids and derivatives	氨基酸及其衍生物	Amino acids and derivatives	氨基酸及其衍生物	1509-34-8	2024600	2192700	4862200	7439500	7950700	10191000	1.08309	0.0118234	0.120616	2.81747	1.4944	up
mws0227	UPLC-MS/MS	C6H13NO2	L-Leucine	L-亮氨酸	Amino acids and derivatives	氨基酸及其衍生物	Amino acids and derivatives	氨基酸及其衍生物	61-90-5	16838000	15077000	40957000	51148000	64797000	77405000	1.03665	0.0239287	0.130844	2.65328	1.40778	up
pmp001198	UPLC-MS/MS	C6H13NO2	6-Deoxyfagomine	6-脱氧荞麦碱	Alkaloids	生物碱	Piperidine alkaloids	哌啶类生物碱	197449-09-5	2396700	2103900	6287400	8115400	9651800	11519000	1.03128	0.0244777	0.130844	2.7147	1.44079	up
mws0258	UPLC-MS/MS	C6H13NO2	L-Isoleucine	L-异亮氨酸	Amino acids and derivatives	氨基酸及其衍生物	Amino acids and derivatives	氨基酸及其衍生物	73-32-5	15915000	15843000	40585000	51396000	64512000	76079000	1.04187	0.0223308	0.130844	2.65384	1.40808	up
pme3034	UPLC-MS/MS	C5H8O4	Ethylmalonic acid	乙基丙二酸	Organic acids	有机酸	Organic acids	有机酸	601-75-2	9	9	9	27727	27292	20350	1.22526	0.00893391	0.117054	2791.44	11.4468	up
pme0243	UPLC-MS/MS	C5H8O4	Glutaric acid	戊二酸	Organic acids	有机酸	Organic acids	有机酸	110-94-1	139570	178400	166890	543280	513800	531140	1.21702	2.69692e-05	0.00691567	3.27563	1.71177	up
Lmmn000806	UPLC-MS/MS	C5H8O4	Dimethylmalonic acid	二甲基丙二酸	Organic acids	有机酸	Organic acids	有机酸	595-46-0	50843	32830	39615	282870	407910	353500	1.21042	0.0122673	0.120616	8.47025	3.0824	up
mws0473	UPLC-MS/MS	C5H8O4	2-Methylsuccinic acid	2-甲基丁二酸	Organic acids	有机酸	Organic acids	有机酸	498-21-5	411260	268130	396350	2796100	3921000	3497600	1.21154	0.0102921	0.120327	9.49551	3.24725	up
Lmgn000160	UPLC-MS/MS	C4H8N2O3	3-Ureidopropionic Acid	3-脲基丙酸	Organic acids	有机酸	Organic acids	有机酸	462-88-4	464000	278540	1178500	28375	39403	131350	1.07837	0.16984	0.255329	0.103656	-3.27012	down
mws0001	UPLC-MS/MS	C4H8N2O3	L-Asparagine	L-天冬酰胺	Amino acids and derivatives	氨基酸及其衍生物	Amino acids and derivatives	氨基酸及其衍生物	70-47-3	10543000	7408900	10954000	635390	625360	2891300	1.11034	0.00552017	0.0994011	0.14364	-2.79947	down
MWS1882	UPLC-MS/MS	C4H7NO4	Iminodiacetic acid	亚氨基二乙酸	Organic acids	有机酸	Organic acids	有机酸	142-73-4	565660	910060	1022900	70137	92782	284370	1.09932	0.0222179	0.130844	0.179014	-2.48185	down
mws0219	UPLC-MS/MS	C4H7NO4	L-Aspartic Acid	L-天冬氨酸	Amino acids and derivatives	氨基酸及其衍生物	Amino acids and derivatives	氨基酸及其衍生物	56-84-8	4670600	6751000	7723700	547810	750400	2226600	1.10346	0.0129482	0.120616	0.184108	-2.44137	down
MWSmce701	UPLC-MS/MS	C9H10O	4-Ethylbenzaldehyde	4-乙基苯甲醛	Others	其它类	Others	其它	4748-78-1	11951	13141	15953	140000	174870	326230	1.20166	0.0727886	0.174409	15.6194	3.96527	up
pmb0374	UPLC-MS/MS	C5H5N5	2-Aminopurine	2-氨基嘌呤	Nucleotides and derivatives	核苷酸及其衍生物	Nucleotides and derivatives	核苷酸及其衍生物	452-06-2	215510	193420	271710	454030	881950	376780	1.03577	0.157273	0.243603	2.5164	1.33136	up
pme0040	UPLC-MS/MS	C5H5N5	Adenine	腺嘌呤	Nucleotides and derivatives	核苷酸及其衍生物	Nucleotides and derivatives	核苷酸及其衍生物	73-24-5	81603	142160	100770	974920	435040	1717000	1.13597	0.128124	0.220502	9.63526	3.26832	up
mws0889	UPLC-MS/MS	C4H8O5	D-Threonic Acid	D-苏糖酸	Others	其它类	Saccharides and Alcohols	糖及醇类	3909-12-4	137950	107910	225280	812390	947070	900940	1.18965	0.000173942	0.0272159	5.64673	2.49742	up
pme1173	UPLC-MS/MS	C5H4N4O	Allopurinol	别嘌呤醇	Nucleotides and derivatives	核苷酸及其衍生物	Nucleotides and derivatives	核苷酸及其衍生物	315-30-0	20297	17572	19957	61649	35879	81320	1.11187	0.0913179	0.189498	3.09286	1.62894	up
pme0033	UPLC-MS/MS	C5H4N4O	Hypoxanthine	次黄嘌呤	Nucleotides and derivatives	核苷酸及其衍生物	Nucleotides and derivatives	核苷酸及其衍生物	68-94-0	29111	14065	32224	89856	45320	77805	1.03201	0.0583159	0.162542	2.82468	1.49809	up
mws1336	UPLC-MS/MS	C7H7NO2	4-Aminobenzoic acid	对氨基苯甲酸	Phenolic acids	酚酸类	Phenolic acids	酚酸类	150-13-0	9	9	9	164660	90062	70535	1.22374	0.0634035	0.166631	12046.6	13.5563	up
mws0749	UPLC-MS/MS	C7H6O3	4-Hydroxybenzoic acid	4-羟基苯甲酸	Phenolic acids	酚酸类	Phenolic acids	酚酸类	99-96-7	135430	181570	308210	7378000	7347300	3380300	1.20118	0.0479876	0.15322	28.9592	4.85595	up
Lmgn001670	UPLC-MS/MS	C7H6O3	Salicylic acid	水杨酸	Phenolic acids	酚酸类	Phenolic acids	酚酸类	69-72-7	79971	126800	131460	1085200	900450	696590	1.20424	0.0182785	0.127665	7.9302	2.98736	up
Lmbn001981	UPLC-MS/MS	C7H6O3	2,5-Dihydroxybenzaldehyde	2,5-二羟基苯甲醛	Phenolic acids	酚酸类	Phenolic acids	酚酸类	1194-98-5	176140	291170	436750	8211000	8252500	3671500	1.19354	0.0515712	0.156015	22.2718	4.47714	up
Hmgn001653	UPLC-MS/MS	C7H6O3	Protocatechualdehyde	原儿茶醛	Phenolic acids	酚酸类	Phenolic acids	酚酸类	139-85-5	159010	282100	411020	7821800	8448600	3809400	1.19523	0.0474373	0.152921	23.5642	4.55853	up
mws0336	UPLC-MS/MS	C6H6N2O2	Urocanic acid	尿刊酸	Organic acids	有机酸	Organic acids	有机酸	104-98-3	1334	4267.8	1746	141810	85172	87211	1.2026	0.0310858	0.132208	42.7601	5.41819	up
mws2368	UPLC-MS/MS	C8H10O2	Tyrosol	酪醇	Phenolic acids	酚酸类	Phenolic acids	酚酸类	501-94-0	5038.5	10049	7276	98051	103910	69738	1.20694	0.014402	0.120791	12.1492	3.60279	up
Hmbn004041	UPLC-MS/MS	C9H14O	2-Pentylfuran	2-戊基呋喃	Others	其它类	Others	其它	3777-69-3	9	9	9	103860	42490	119970	1.22182	0.0640004	0.167436	9863.7	13.2679	up
pme2828	UPLC-MS/MS	C6H5NO3	4-Nitrophenol	4-硝基苯酚	Phenolic acids	酚酸类	Phenolic acids	酚酸类	100-02-7	1299800	1211000	1163800	3732700	4786500	3851700	1.21414	0.012047	0.120616	3.3666	1.75129	up
pme3207	UPLC-MS/MS	C6H6O4	Muconic acid	己二烯二酸	Organic acids	有机酸	Organic acids	有机酸	1119-72-8	5538700	6027200	5657700	975260	994600	1114900	1.22354	0.000408148	0.0385592	0.179101	-2.48116	down
Hmsp000364	UPLC-MS/MS	C7H13NO2	L-Cyclopentylglycine	环戊基甘氨酸	Amino acids and derivatives	氨基酸及其衍生物	Amino acids and derivatives	氨基酸及其衍生物	2521-84-8	254930	275080	184970	4633100	4479100	4013200	1.22069	0.00167786	0.0710719	18.3577	4.19831	up
pmp000966	UPLC-MS/MS	C7H13NO2	Stachydrine	水苏碱	Alkaloids	生物碱	Pyrrole alkaloids	吡咯类生物碱	471-87-4	86194	94712	109420	290980	149810	397400	1.04823	0.124497	0.218352	2.88706	1.5296	up
Rfmb320	UPLC-MS/MS	C7H13NO2	1-Methylpiperidine-2-carboxylic acid	1-甲基哌啶-2-羧酸	Amino acids and derivatives	氨基酸及其衍生物	Amino acids and derivatives	氨基酸及其衍生物	7730-87-2	105560	101850	50849	382160	245610	520130	1.12207	0.0584107	0.162554	4.44476	2.15211	up
Rfmb318	UPLC-MS/MS	C7H14NO2+	D-Proline betaine	脯氨酸甜菜碱	Amino acids and derivatives	氨基酸及其衍生物	Amino acids and derivatives	氨基酸及其衍生物	1195-94-4	26318	28686	24312	123670	115610	217700	1.18997	0.0613611	0.164118	5.76151	2.52645	up
pme0295	UPLC-MS/MS	C6H11NO3	4-Acetamidobutyric acid	4-乙酰氨基丁酸	Organic acids	有机酸	Organic acids	有机酸	3025-96-5	112000	56633	83386	799870	675680	657180	1.2021	0.00224509	0.074624	8.46258	3.0811	up
mws0567	UPLC-MS/MS	C5H11N3O2	4-Guanidinobutyric acid	4-胍基丁酸	Organic acids	有机酸	Organic acids	有机酸	463-00-3	12062000	7956500	5238400	1858300	1576500	1893200	1.16704	0.0783819	0.181075	0.210952	-2.24501	down
pme0193	UPLC-MS/MS	C5H10N2O3	L-Glutamine	L-谷氨酰胺	Amino acids and derivatives	氨基酸及其衍生物	Amino acids and derivatives	氨基酸及其衍生物	56-85-9	932340	1652700	1936000	4447200	5253000	2291500	1.01078	0.0939774	0.191911	2.65242	1.40731	up
Zmzn000113	UPLC-MS/MS	C5H9NO4	L-threo-3-Methylaspartate	L-苏式-3-甲基天冬氨酸	Amino acids and derivatives	氨基酸及其衍生物	Amino acids and derivatives	氨基酸及其衍生物	6061-13-8	1530900	1848500	1634900	146440	172160	205100	1.21936	0.00304099	0.0807754	0.104441	-3.25924	down
pme0014	UPLC-MS/MS	C5H9NO4	L-Glutamic acid	L-谷氨酸	Amino acids and derivatives	氨基酸及其衍生物	Amino acids and derivatives	氨基酸及其衍生物	56-86-0	53555000	64384000	28346000	3904600	4094500	9267400	1.15982	0.0530141	0.157647	0.118033	-3.08273	down
MWS3036	UPLC-MS/MS	C5H8O5	3-Hydroxyglutaric acid	3-羟基戊二酸	Organic acids	有机酸	Organic acids	有机酸	638-18-6	14261	12313	37630	164920	148880	227590	1.16315	0.0144723	0.120791	8.43234	3.07593	up
Zmyn000247	UPLC-MS/MS	C5H8O5	2-Hydroxyglutaric Acid	2-羟基戊二酸	Organic acids	有机酸	Organic acids	有机酸	13095-48-2	151480	119900	214920	584940	581300	588930	1.18646	0.00414363	0.0894361	3.60923	1.85169	up
Lmbn000216	UPLC-MS/MS	C5H8O5	3-Methylmalic acid	3-甲基苹果酸	Organic acids	有机酸	Organic acids	有机酸	152204-30-3	136560	150030	213110	570820	660250	590330	1.19924	0.000284976	0.0300901	3.64499	1.86591	up
pmb2826	UPLC-MS/MS	C5H8O5	L-Citramalic acid	2-甲基苹果酸	Organic acids	有机酸	Organic acids	有机酸	6236-09-5	104930	106710	231390	1180300	1106000	1057900	1.1897	7.33973e-05	0.0146387	7.54847	2.91618	up
ML10171848	UPLC-MS/MS	C5H8O5	D-Arabinono-1,4-lactone	D-阿拉伯-1,4-内酯	Others	其它类	Saccharides and Alcohols	糖及醇类	2782-09-4	8050.8	8485.9	28034	174780	150320	184080	1.16972	0.000490227	0.0439979	11.4241	3.51401	up
MWSmce199	UPLC-MS/MS	C5H10O5	L-Xylose	L-木糖	Others	其它类	Saccharides and Alcohols	糖及醇类	609-06-3	149700	124300	77176	522790	541430	402710	1.17308	0.00512372	0.0978413	4.17719	2.06253	up
MWSmce682	UPLC-MS/MS	C5H10O5	DL-Xylose	DL-木糖	Others	其它类	Saccharides and Alcohols	糖及醇类	25990-60-7	121280	113190	73085	522200	518330	458270	1.19993	0.00018518	0.0272159	4.87327	2.28489	up
Zmgn000173	UPLC-MS/MS	C5H10O5	D-Ribose	D-核糖	Others	其它类	Saccharides and Alcohols	糖及醇类	50-69-1	13442	7534.5	16613	814110	1092000	582210	1.21365	0.0309988	0.132208	66.1972	6.0487	up
mws1499	UPLC-MS/MS	C5H10O5	D-Arabinose	D-阿拉伯糖	Others	其它类	Saccharides and Alcohols	糖及醇类	10323-20-3	99775	120750	71139	427160	568920	396180	1.19232	0.0152199	0.121219	4.77351	2.25505	up
Lmxn006423	UPLC-MS/MS	C7H5NOS	2(3H)-Benzothiazolone	2-羟基苯并噻唑	Alkaloids	生物碱	Alkaloids	生物碱	934-34-9	11613	11403	14541	2560	5415.4	5111.6	1.11201	0.0040292	0.0894361	0.348457	-1.52095	down
mws0183	UPLC-MS/MS	C7H6O4	3,4-Dihydroxybenzoic acid (Protocatechuic acid)	3,4-二羟基苯甲酸; 原儿茶酸	Phenolic acids	酚酸类	Phenolic acids	酚酸类	99-50-3	67078	80597	88344	6223600	7481300	2543500	1.21048	0.0691445	0.171852	68.8436	6.10525	up
mws0180	UPLC-MS/MS	C7H6O4	2,5-Dihydroxybenzoic acid; Gentisic Acid	2,5-二羟基苯甲酸; 龙胆酸	Phenolic acids	酚酸类	Phenolic acids	酚酸类	490-79-9	28644	59690	43738	2678100	3475200	1113500	1.20279	0.0755315	0.177574	55.0215	5.78192	up
mws0639	UPLC-MS/MS	C7H6O4	2,3-Dihydroxybenzoic Acid	2,3-二羟基苯甲酸	Organic acids	有机酸	Organic acids	有机酸	303-38-8	57054	93791	60295	5599600	7034900	2052800	1.20399	0.082639	0.18287	69.5619	6.12023	up
mws0254	UPLC-MS/MS	C6H9N3O2	L-Histidine	L-组氨酸	Amino acids and derivatives	氨基酸及其衍生物	Amino acids and derivatives	氨基酸及其衍生物	71-00-1	1421000	2424500	5838600	429590	583780	693250	1.07077	0.184649	0.266865	0.176229	-2.50448	down
mws1417	UPLC-MS/MS	C9H7NO2	Indole-3-carboxylic acid	吲哚-3-甲酸	Alkaloids	生物碱	Plumerane	吲哚类生物碱	771-50-6	12754	2296.7	14942	132370	64294	247270	1.08939	0.122011	0.217074	14.8014	3.88766	up
mws0102	UPLC-MS/MS	C9H7NO2	Indole-5-carboxylic acid	吲哚-5-甲酸	Alkaloids	生物碱	Plumerane	吲哚类生物碱	1670-81-1	1850.2	3747.8	11061	36874	23675	88454	1.06891	0.152766	0.237828	8.94429	3.16097	up
mws1346	UPLC-MS/MS	C6H11NO4	DL-2-Aminoadipic acid	DL-2-氨基己二酸	Alkaloids	生物碱	Alkaloids	生物碱	542-32-5	125700	129220	147780	339770	481960	693040	1.16363	0.0681966	0.170823	3.76153	1.91132	up
pme3382	UPLC-MS/MS	C6H11NO4	N-Acetyl-L-threonine	N-乙酰-L-苏氨酸	Amino acids and derivatives	氨基酸及其衍生物	Amino acids and derivatives	氨基酸及其衍生物	17093-74-2	26908	44638	36232	89860	96442	152140	1.14335	0.0522708	0.1569	3.14018	1.65085	up
MWS0559	UPLC-MS/MS	C6H10O5	1,6-anhydro-β-D-glucose	1,6-脱水-β-D-葡萄糖	Others	其它类	Saccharides and Alcohols	糖及醇类	498-07-7	17296	3685.9	1966.5	284240	243810	187230	1.15681	0.0126053	0.120616	31.1691	4.96204	up
Lmbp000123	UPLC-MS/MS	C6H13NO2S	L-Homomethionine	L-高甲硫氨酸	Amino acids and derivatives	氨基酸及其衍生物	Amino acids and derivatives	氨基酸及其衍生物	25148-30-5	8564.2	11783	48897	127220	144510	95921	1.07266	0.0067964	0.109917	5.30948	2.40857	up
Lmmn001643	UPLC-MS/MS	C9H8O3	2-Hydroxycinnamic acid	2-羟基肉桂酸	Organic acids	有机酸	Organic acids	有机酸	583-17-5	11357	17009	10903	481230	886050	403150	1.21388	0.0611341	0.164118	45.0847	5.49457	up
pme1439	UPLC-MS/MS	C9H8O3	p-coumaric acid	对香豆酸	Phenolic acids	酚酸类	Phenolic acids	酚酸类	501-98-4	14908	26956	128900	259410	487740	194330	1.01861	0.0862843	0.184821	5.51334	2.46293	up
mws0159	UPLC-MS/MS	C9H8O3	Phenylpyruvic acid	苯丙酮酸	Organic acids	有机酸	Organic acids	有机酸	156-06-9	15348	2672.8	23373	54052	123840	62185	1.00153	0.086065	0.184821	5.79983	2.53601	up
MWSCX015	UPLC-MS/MS	C9H8O3	(E)-3-(3,4-dihydroxyphenyl)acrylaldehyde	咖啡醛	Others	其它类	Others	其它	-	21162	69112	146780	303670	842260	310280	1.02654	0.145496	0.233197	6.14295	2.61893	up
pme3083	UPLC-MS/MS	C8H7NO3	2-(Formylamino)benzoic acid	2-(甲酰氨基)苯甲酸	Phenolic acids	酚酸类	Phenolic acids	酚酸类	3342-77-6	44056	29722	220590	867610	1267500	964030	1.1166	0.00638825	0.108002	10.5281	3.39618	up
pme0021	UPLC-MS/MS	C9H11NO2	L-Phenylalanine	L-苯丙氨酸	Amino acids and derivatives	氨基酸及其衍生物	Amino acids and derivatives	氨基酸及其衍生物	63-91-2	5773200	4490900	10417000	17773000	20045000	20709000	1.11378	0.00881034	0.117054	2.82998	1.50079	up
pme0282	UPLC-MS/MS	C8H6O4	Phthalic acid	邻苯二甲酸	Organic acids	有机酸	Organic acids	有机酸	88-99-3	6104	23933	26749	113090	117250	140090	1.11454	0.000805081	0.0601896	6.52326	2.70559	up
pme0281	UPLC-MS/MS	C8H6O4	Terephthalic acid	对苯二甲酸	Phenolic acids	酚酸类	Phenolic acids	酚酸类	100-21-0	185350	162460	222080	959140	1320400	1414600	1.20994	0.0161231	0.121912	6.4822	2.69648	up
pmc0274	UPLC-MS/MS	C6H6N4S	6-Methylmercaptopurine	6-甲基巯嘌呤	Nucleotides and derivatives	核苷酸及其衍生物	Nucleotides and derivatives	核苷酸及其衍生物	50-66-8	8316100	6038900	13999000	23478000	27118000	28049000	1.11111	0.00705464	0.109917	2.77368	1.4718	up
mws0344	UPLC-MS/MS	C5H10O6	D-Xylonic acid	D-木糖酸	Others	其它类	Saccharides and Alcohols	糖及醇类	526-91-0	2413400	1929400	3352100	11136000	11675000	14354000	1.19546	0.00431185	0.0899974	4.82982	2.27197	up
Lmrn003000	UPLC-MS/MS	C9H10O3	2-Hydroxy-3-phenylpropanoic acid	2-羟基-3-苯基丙酸	Phenolic acids	酚酸类	Phenolic acids	酚酸类	7326-19-4	1231000	1377200	1885500	178700	141940	87930	1.1999	0.0190971	0.130844	0.0909206	-3.45925	down
Lmgp002595	UPLC-MS/MS	C9H10O3	Acetovanillone	香荚兰乙酮	Phenolic acids	酚酸类	Phenolic acids	酚酸类	498-02-2	218720	272580	113660	74610	51645	32099	1.07911	0.0772674	0.179424	0.261759	-1.93369	down
Lmbn005172	UPLC-MS/MS	C9H10O3	2,6-Dimethoxybenzaldehyde	2,6-二甲氧基苯甲醛	Phenolic acids	酚酸类	Phenolic acids	酚酸类	3392-97-0	461760	558840	466690	96407	65012	42724	1.19106	0.00136831	0.0701746	0.137258	-2.86503	down
MWS0274	UPLC-MS/MS	C9H10O3	DL-3-Phenyllactic acid	DL-3-苯基乳酸	Organic acids	有机酸	Organic acids	有机酸	828-01-3	209400	292760	234790	57588	43105	25378	1.17628	0.00773811	0.110237	0.171071	-2.54733	down
mws0467	UPLC-MS/MS	C9H10O3	3-(4-Hydroxyphenyl)-propionic acid	3-(4-羟基苯基)丙酸	Phenolic acids	酚酸类	Phenolic acids	酚酸类	501-97-3	591290	788110	622580	144340	76746	78415	1.19343	0.00599946	0.105579	0.149602	-2.74079	down
MWSmce165	UPLC-MS/MS	C6H14O5	L-Fucitol	L-岩藻糖醇	Others	其它类	Saccharides and Alcohols	糖及醇类	13074-06-1	181480	146930	234240	1117600	1000600	1097700	1.21009	8.22456e-05	0.0147631	5.71563	2.51491	up
MWS3270	UPLC-MS/MS	C7H5NO4	quinolinic Acid	喹啉酸	Alkaloids	生物碱	Alkaloids	生物碱	89-00-9	66046	81071	51649	284390	202550	384170	1.16883	0.0475374	0.152921	4.38259	2.13178	up
mws2125	UPLC-MS/MS	C3H5O6P	Phosphoenolpyruvate	磷酸烯醇式丙酮酸	Organic acids	有机酸	Organic acids	有机酸	138-08-9	42933	19689	139290	5998.2	5597.4	1251.7	1.05914	0.22718	0.311051	0.0636282	-3.97419	down
mws0028	UPLC-MS/MS	C8H8O4	Vanillic acid	香草酸	Phenolic acids	酚酸类	Phenolic acids	酚酸类	121-34-6	110960	140500	222420	2886200	1873500	2198500	1.20741	0.017555	0.126155	14.6835	3.87612	up
MWSslk138	UPLC-MS/MS	C7H6O5	2,3,4-Trihydroxybenzoic acid	2,3,4-三羟基苯甲酸	Phenolic acids	酚酸类	Phenolic acids	酚酸类	610-02-6	9225	9	9	2310500	3916700	541990	1.09904	0.146923	0.234008	732.359	9.51641	up
pme0253	UPLC-MS/MS	C8H15NO3	N-Acetyl-L-leucine	N-乙酰-L-亮氨酸	Amino acids and derivatives	氨基酸及其衍生物	Amino acids and derivatives	氨基酸及其衍生物	1188-21-2	7569.2	17368	9451.2	73891	55687	62578	1.17751	0.0026724	0.0764643	5.58781	2.48228	up
MA10039492	UPLC-MS/MS	C6H6O6	Dehydroascorbic acid	脱氢抗坏血酸	Others	其它类	Vitamin	维生素	490-83-5	40685	43731	17294	3289500	1772800	2322000	1.20913	0.0317352	0.132208	72.6015	6.18193	up
pme2550	UPLC-MS/MS	C6H6O6	Cis-Aconitic acid	顺式乌头酸	Organic acids	有机酸	Organic acids	有机酸	585-84-2	14693	8959.7	15978	5427500	2838400	3577100	1.21972	0.0362343	0.135374	298.834	8.2232	up
pme3009	UPLC-MS/MS	C6H6O6	Trans-Citridic acid	反式乌头酸	Organic acids	有机酸	Organic acids	有机酸	4023-65-8	9	9	9	50324	70888	93918	1.22443	0.029481	0.132208	7967.78	12.96	up
mws0154	UPLC-MS/MS	C7H10O5	Shikimic acid	莽草酸	Organic acids	有机酸	Organic acids	有机酸	138-59-0	49756	18679	61204	14676000	7620300	8078800	1.21065	0.0474972	0.152921	234.305	7.87225	up
mws0242	UPLC-MS/MS	C8H14O4	Suberic Acid	辛二酸	Organic acids	有机酸	Organic acids	有机酸	505-48-6	39262	34690	54090	199540	283810	627210	1.1545	0.128992	0.221223	8.6734	3.1166	up
Zmyn000155	UPLC-MS/MS	C7H14N2O3	N-α-Acetyl-L-ornithine	N-α-乙酰基-L-鸟氨酸	Amino acids and derivatives	氨基酸及其衍生物	Amino acids and derivatives	氨基酸及其衍生物	6205-08-9	3017100	4132400	9436600	32069	56819	85353	1.20176	0.109851	0.206691	0.0105052	-6.57275	down
MWSmce119	UPLC-MS/MS	C6H14N4O2	L-Arginine	L-精氨酸	Amino acids and derivatives	氨基酸及其衍生物	Amino acids and derivatives	氨基酸及其衍生物	74-79-3	9738200	12513000	72932000	188970	263070	336330	1.17308	0.266514	0.344415	0.00828266	-6.91569	down
pme0008	UPLC-MS/MS	C6H13N3O3	L-Citrulline	L-瓜氨酸	Amino acids and derivatives	氨基酸及其衍生物	Amino acids and derivatives	氨基酸及其衍生物	372-75-8	1034700	1305500	3086500	198380	161350	245020	1.16	0.129621	0.221223	0.11144	-3.16566	down
Lmbn001754	UPLC-MS/MS	C7H12O5	3-Isopropylmalic Acid	3-异丙基苹果酸	Organic acids	有机酸	Organic acids	有机酸	921-28-8	114620	75866	172290	2870900	1289100	2807000	1.19006	0.0505794	0.156015	19.2047	4.26339	up
pmb3101	UPLC-MS/MS	C7H12O5	2-Isopropylmalic Acid	2-异丙基苹果酸	Organic acids	有机酸	Organic acids	有机酸	49601-06-1	84882	61145	125420	2231100	1172100	2744800	1.1973	0.0513675	0.156015	22.649	4.50137	up
Zmgn001448	UPLC-MS/MS	C7H12O5	2-Propylmalic Acid	2-丙基苹果酸	Organic acids	有机酸	Organic acids	有机酸	-	137840	78036	162190	2846200	1171500	3069700	1.18284	0.0645863	0.167486	18.7465	4.22855	up
mws1013	UPLC-MS/MS	C9H6O4	Esculetin	秦皮乙素	Lignans and Coumarins	木脂素和香豆素	Coumarins	香豆素	305-01-1	1928000	7675600	3627000	160030	246030	135300	1.17539	0.131164	0.222533	0.0409173	-4.61115	down
pmb2795	UPLC-MS/MS	C10H10O3	4-Methoxycinnamic acid	4-甲氧基肉桂酸	Phenolic acids	酚酸类	Phenolic acids	酚酸类	830-09-1	4552.7	5407.4	37556	327880	203690	138920	1.11163	0.0595576	0.162558	14.1108	3.81873	up
Jmzn006005	UPLC-MS/MS	C10H10O3	3,4-methylenedioxy cinnamyl alcohol	3,4-亚甲二氧肉桂醇	Lignans and Coumarins	木脂素和香豆素	Lignans	木脂素	58095-76-4	7469.5	9511.4	77596	670530	437970	338230	1.11083	0.0385572	0.141245	15.2969	3.93516	up
pme0516	UPLC-MS/MS	C6H12O6	Inositol	肌醇	Others	其它类	Saccharides and Alcohols	糖及醇类	87-89-8	157990	112230	104280	1320000	1683800	908620	1.20425	0.0335893	0.13268	10.447	3.38502	up
mws4170	UPLC-MS/MS	C6H12O6	D-Glucose	D-葡萄糖	Others	其它类	Saccharides and Alcohols	糖及醇类	50-99-7	472020	287720	224910	8238200	9005100	5696800	1.20883	0.017714	0.12631	23.2977	4.54212	up
mws1164	UPLC-MS/MS	C6H12O6	D-Fructose	D-果糖	Others	其它类	Saccharides and Alcohols	糖及醇类	57-48-7	483060	321600	304220	8502700	8928000	6228100	1.21627	0.011914	0.120616	21.3358	4.4152	up
mws0093	UPLC-MS/MS	C10H12O3	Coniferyl alcohol	松柏醇	Phenolic acids	酚酸类	Phenolic acids	酚酸类	458-35-5	127730	144790	271040	16984	24164	25920	1.18469	0.0717767	0.173581	0.123387	-3.01874	down
Hmcn006267	UPLC-MS/MS	C9H10O4	2,6-Dimethoxybenzoic acid	2,6-二甲氧基苯甲酸	Phenolic acids	酚酸类	Phenolic acids	酚酸类	1466-76-8	5828.9	7252.3	30988	1458300	1506500	1122900	1.19798	0.0076984	0.110237	92.7564	6.53537	up
MWSmce455	UPLC-MS/MS	C9H10O4	Vanillic acid methyl ester	香草酸甲酯	Phenolic acids	酚酸类	Phenolic acids	酚酸类	3943-74-6	4515.7	9865.6	26407	1456100	1480000	1118600	1.20021	0.00737329	0.109917	99.4084	6.6353	up
Lmrn001951	UPLC-MS/MS	C9H10O4	(S)-2-Hydroxy-3-(4-Hydroxyphenyl)Propanoic Acid	2-羟基-(4-羟基苯基)丙酸	Phenolic acids	酚酸类	Phenolic acids	酚酸类	23508-35-2	34494	52037	60774	4627.2	9	9	1.03156	0.0219266	0.130844	0.0315346	-4.98692	down
mws1155	UPLC-MS/MS	C6H14O6	D-Mannitol	D-甘露醇	Others	其它类	Saccharides and Alcohols	糖及醇类	69-65-8	68331	71813	38371	169650	140570	97835	1.0437	0.0474483	0.152921	2.28583	1.19272	up
pme2596	UPLC-MS/MS	C8H9NO4	4-Pyridoxic acid	4-吡哆酸	Others	其它类	Vitamin	维生素	82-82-6	20969	12120	30836	77015	82483	70326	1.13438	0.00194779	0.0738137	3.59521	1.84608	up
mws0736	UPLC-MS/MS	C8H16N2O3	N-Glycyl-L-leucine	N-甘氨酰-L-亮氨酸	Amino acids and derivatives	氨基酸及其衍生物	Amino acids and derivatives	氨基酸及其衍生物	869-19-2	293820	476860	923750	2533300	4038200	3220400	1.14592	0.0139584	0.120616	5.77888	2.53079	up
mws5041	UPLC-MS/MS	C8H16N2O3	L-Glycyl-L-isoleucine	L-甘氨酰-L-异亮氨酸	Amino acids and derivatives	氨基酸及其衍生物	Amino acids and derivatives	氨基酸及其衍生物	19461-38-2	300960	414220	645020	2266000	3545000	2644100	1.18387	0.0191351	0.130844	6.21607	2.636	up
Zmdp000292	UPLC-MS/MS	C7H16N4O2	Arginine methyl ester	精氨酸甲酯	Amino acids and derivatives	氨基酸及其衍生物	Amino acids and derivatives	氨基酸及其衍生物	-	10482000	12296000	21371000	752730	794140	1036400	1.20767	0.0542362	0.158557	0.0585125	-4.09511	down
Zmjp000182	UPLC-MS/MS	C7H16N4O2	N-Monomethyl-L-arginine	N-单甲基-L-精氨酸	Amino acids and derivatives	氨基酸及其衍生物	Amino acids and derivatives	氨基酸及其衍生物	17035-90-4	8608700	11025000	22900000	727460	862950	823210	1.19682	0.093933	0.191911	0.0567461	-4.13934	down
pmp001232	UPLC-MS/MS	C12H14O2	Neoligustilide	新藁本内脂	Others	其它类	Others	其它	-	7112.2	7789.7	8601.1	62352	29226	54057	1.18214	0.0546328	0.159457	6.19644	2.63144	up
mws1189	UPLC-MS/MS	C6H10O7	D-Galacturonic acid	D-半乳糖醛酸	Organic acids	有机酸	Organic acids	有机酸	685-73-4	43552	33236	68979	196990	220100	88404	1.05895	0.0896288	0.18751	3.46782	1.79403	up
mws0014	UPLC-MS/MS	C10H10O4	Ferulic acid	阿魏酸	Phenolic acids	酚酸类	Phenolic acids	酚酸类	537-98-4	7043500	8239800	18508000	2418800	2728100	2944100	1.113	0.142515	0.230216	0.23944	-2.06226	down
pme0422	UPLC-MS/MS	C10H10O4	Isoferulic Acid	异阿魏酸	Phenolic acids	酚酸类	Phenolic acids	酚酸类	537-73-5	7063500	7785900	18440000	2338200	2605000	3274600	1.09901	0.150231	0.23668	0.246859	-2.01824	down
MWSmce632	UPLC-MS/MS	C10H10O4	Vanillin acetate	香兰素乙酸酯	Others	其它类	Others	其它	881-68-5	6533	13658	3268.1	139720	165350	205940	1.18488	0.0121657	0.120616	21.783	4.44513	up
Lmdn003756	UPLC-MS/MS	C10H10O4	Methyl caffeate	咖啡酸甲酯	Phenolic acids	酚酸类	Phenolic acids	酚酸类	3843-74-1	4944.7	7896.1	7841.9	282130	246920	716750	1.20487	0.113945	0.210422	60.2339	5.9125	up
mws2104	UPLC-MS/MS	C7H14O6	D-Pinitol	D-松醇	Others	其它类	Saccharides and Alcohols	糖及醇类	10284-63-6	6871.8	12029	6125.2	44524	34499	38364	1.18123	0.00182134	0.0710719	4.6906	2.22977	up
pme1261	UPLC-MS/MS	C9H19NO4	D-Panthenol	D-泛酰醇	Others	其它类	Saccharides and Alcohols	糖及醇类	81-13-0	7192.7	14300	5797.2	18804	19757	35046	1.02429	0.0803509	0.181879	2.69722	1.43148	up
mws1076	UPLC-MS/MS	C11H10O4	Scoparone	滨蒿内酯	Lignans and Coumarins	木脂素和香豆素	Coumarins	香豆素	120-08-1	9	22359	9	471690	188210	439520	1.02526	0.056101	0.160789	49.1317	5.61858	up
MA10107783	UPLC-MS/MS	C10H8O5	3-[(1-Carboxyvinyl)oxy]benzoic acid	3-[(1-羧乙烯基)氧基]苯甲酸	Phenolic acids	酚酸类	Phenolic acids	酚酸类	16929-37-6	5753600	6602400	7901000	775300	389720	335130	1.19995	0.00750524	0.109995	0.0740559	-3.75524	down
Zmpn000199	UPLC-MS/MS	C6H10O8	D-Galactaric acid	D-半乳糖二酸	Others	其它类	Saccharides and Alcohols	糖及醇类	526-99-8	1232900	997350	504750	11125000	15252000	13523000	1.19895	0.00766596	0.110237	14.5887	3.86678	up
Zmyn000108	UPLC-MS/MS	C6H10O8	D-Saccharic acid	D-蔗糖酸	Others	其它类	Saccharides and Alcohols	糖及醇类	87-73-0	1526000	1195400	1484900	12888000	14829000	13579000	1.22169	0.0015779	0.0710719	9.81765	3.29538	up
Hmcn000192	UPLC-MS/MS	C7H14O7	Sedoheptulose	景天庚酮糖	Others	其它类	Saccharides and Alcohols	糖及醇类	3019-74-7	1096400	856510	866990	5241800	5373000	5402200	1.21929	6.91933e-06	0.00327193	5.67999	2.50589	up
MWSmce355	UPLC-MS/MS	C10H12O5	Methyl Syringate	丁香酸甲酯	Phenolic acids	酚酸类	Phenolic acids	酚酸类	884-35-5	9	9	9	806250	141940	394960	1.21939	0.146852	0.234008	49746.3	15.6023	up
mws1512	UPLC-MS/MS	C10H12O5	Propyl gallate	没食子酸丙酯(PG)	Phenolic acids	酚酸类	Phenolic acids	酚酸类	121-79-9	9	9	9	47818	65735	18695	1.22119	0.0846266	0.184127	4898.07	12.258	up
Hmln002597	UPLC-MS/MS	C10H9NaO4	Sodium ferulate	阿魏酸钠	Phenolic acids	酚酸类	Phenolic acids	酚酸类	24276-84-4	644230	1228600	1303700	7137000	3283100	3178500	1.10403	0.113025	0.20937	4.28096	2.09793	up
pme0170	UPLC-MS/MS	C8H16N4O3	N-Acetyl-L-Arginine	N-乙酰-L-精氨酸	Amino acids and derivatives	氨基酸及其衍生物	Amino acids and derivatives	氨基酸及其衍生物	155-84-0	1751.8	1558	11204	32838	45133	54324	1.09782	0.011369	0.120616	9.11512	3.18826	up
mws0677	UPLC-MS/MS	C12H14N2O2	N-Acetyl-5-hydroxytryptamine	N-乙酰-5-羟基色胺	Alkaloids	生物碱	Plumerane	吲哚类生物碱	1210-83-9	18116	45783	56664	258480	284040	184910	1.14403	0.0121844	0.120616	6.03361	2.59302	up
pme1228	UPLC-MS/MS	C11H12N2O3	5-Hydroxy-L-tryptophan	5-羟基-L-色氨酸	Amino acids and derivatives	氨基酸及其衍生物	Amino acids and derivatives	氨基酸及其衍生物	56-69-9	31518	32027	47794	622850	569150	749750	1.21811	0.00716182	0.109917	17.44	4.12433	up
Lmtp005226	UPLC-MS/MS	C15H24O	Santalol	檀香醇	Others	其它类	Others	其它	11031-45-1	23829	13568	44192	161170	98143	416930	1.07868	0.178003	0.262112	8.28841	3.0511	up
mws2608	UPLC-MS/MS	C8H15NO6	N-Acetyl-D-galactosamine	N-乙酰-D-半乳糖胺	Others	其它类	Saccharides and Alcohols	糖及醇类	1811-31-0	264590	158870	238800	421560	639100	372020	1.0562	0.0736334	0.17521	2.16332	1.11325	up
Lmjp002764	UPLC-MS/MS	C11H10O5	Umckalin (7-hydroxy-5,6-dimethoxycoumarin)	5,6-二甲氧基-7-羟基香豆素	Lignans and Coumarins	木脂素和香豆素	Coumarins	香豆素	43053-62-9	165560	589120	1141600	65770	85220	51100	1.05022	0.183563	0.266213	0.106572	-3.2301	down
MWS4296	UPLC-MS/MS	C11H14N2O3	Glycylphenylalanine	甘氨酰苯基丙氨酸	Amino acids and derivatives	氨基酸及其衍生物	Amino acids and derivatives	氨基酸及其衍生物	3321-03-7	319730	364870	678060	1304000	1971000	1539300	1.14073	0.0124298	0.120616	3.53302	1.8209	up
mws5042	UPLC-MS/MS	C11H14N2O3	L-Glycyl-L-phenylalanine	L-甘氨酰-L-苯丙氨酸	Amino acids and derivatives	氨基酸及其衍生物	Amino acids and derivatives	氨基酸及其衍生物	721-66-4	312760	399760	758490	1107300	1670900	1694700	1.09376	0.0163604	0.122032	3.0407	1.6044	up
mws0520	UPLC-MS/MS	C11H13NO4	N-Acetyl-L-tyrosine	N-乙酰-L-酪氨酸	Amino acids and derivatives	氨基酸及其衍生物	Amino acids and derivatives	氨基酸及其衍生物	537-55-3	4992	1067.5	8254.5	44264	39424	56691	1.10005	0.00737037	0.109917	9.80711	3.29383	up
Lmmp003517	UPLC-MS/MS	C13H20O3	Solatuberenol A	Solatuberenol A	Others	其它类	Others	其它	-	22432	42124	13556	516700	451300	832680	1.19262	0.0389647	0.142447	23.0525	4.52685	up
Lmyp003951	UPLC-MS/MS	C11H14O5	3-Hydroxy-1-(4-hydroxy-3,5-dimethoxyphenyl)propan-1-one	3-羟基-1-(4-羟基-3,5-二甲氧基苯基)丙-1-酮	Phenolic acids	酚酸类	Phenolic acids	酚酸类	-	11740	27816	23514	126520	112720	107550	1.17558	0.000255365	0.0300901	5.49849	2.45904	up
Lmdp002381	UPLC-MS/MS	C11H14O5	Genipin	京尼平	Terpenoids	萜类	Monoterpenoids	倍萜	6902-77-8	6574.6	16409	17034	81519	93108	143640	1.16471	0.0362756	0.135374	7.95318	2.99153	up
Zmnn007376	UPLC-MS/MS	C14H12O3	Xanthyletin	花椒内酯	Lignans and Coumarins	木脂素和香豆素	Coumarins	香豆素	553-19-5	9	9	9	283010	136220	172460	1.22417	0.0466308	0.152741	21914.4	14.4196	up
Lmhp001461	UPLC-MS/MS	C11H20N2O3	L-Prolyl-L-Leucine	L-脯氨酰-L-亮氨酸	Amino acids and derivatives	氨基酸及其衍生物	Amino acids and derivatives	氨基酸及其衍生物	52899-07-7	330540	405060	953170	2407900	3302100	2901700	1.14458	0.00268371	0.0764643	5.09939	2.35033	up
Lmhp001670	UPLC-MS/MS	C11H22N2O3	L-Valyl-L-Leucine	L-缬氨酰-L-亮氨酸	Amino acids and derivatives	氨基酸及其衍生物	Amino acids and derivatives	氨基酸及其衍生物	3989-97-7	1447900	1458100	3311000	7952600	9901700	8071100	1.14878	0.00175337	0.0710719	4.17008	2.06008	up
pmb0962	UPLC-MS/MS	C10H22N2O4	L-Lysine-Butanoic Acid	L-赖氨酸丁酸酯	Amino acids and derivatives	氨基酸及其衍生物	Amino acids and derivatives	氨基酸及其衍生物	80407-71-2	11352	10080	14265	23287	24276	54077	1.04871	0.159689	0.246562	2.8473	1.50959	up
mws4176	UPLC-MS/MS	C12H16N2O3	L-Alanyl-L-Phenylalanine	L-丙氨酰-L-苯丙氨酸	Amino acids and derivatives	氨基酸及其衍生物	Amino acids and derivatives	氨基酸及其衍生物	3061-90-3	229440	253470	499800	837460	1190100	770350	1.09539	0.0233284	0.130844	2.84714	1.50951	up
mws0984	UPLC-MS/MS	C9H11N5O3	L-Sepiapterin	L-墨喋呤	Nucleotides and derivatives	核苷酸及其衍生物	Nucleotides and derivatives	核苷酸及其衍生物	17094-01-8	9	9	9	102560	31857	51775	1.22143	0.0983679	0.196423	6896	12.7515	up
Lmyn000160	UPLC-MS/MS	C8H14O8	Mucic acid Dimethyl Ester	粘酸二甲酯	Phenolic acids	酚酸类	Phenolic acids	酚酸类	-	225300	193090	216110	1071300	1064700	946300	1.22165	0.00156727	0.0710719	4.85784	2.28032	up
pme0264	UPLC-MS/MS	C10H14N2O5	Thymidine	胸苷	Nucleotides and derivatives	核苷酸及其衍生物	Nucleotides and derivatives	核苷酸及其衍生物	50-89-5	205240	139520	261890	764050	597920	913080	1.16189	0.0158052	0.121383	3.75019	1.90696	up
Zmcp102602	UPLC-MS/MS	C17H22O	Bupleurynol	柴胡炔醇	Others	其它类	Others	其它	-	5100400	12469000	6585000	1582000	1014100	2405700	1.11023	0.100648	0.197257	0.207076	-2.27177	down
MWS2430	UPLC-MS/MS	C15H30O2	13-methylmyristic acid	13-甲基十四烷酸	Lipids	脂质	Free fatty acids	游离脂肪酸	2485-71-4	74362	102530	177840	36173	54461	33554	1.05136	0.124993	0.218352	0.35009	-1.5142	down
pme3732	UPLC-MS/MS	C9H13N3O5	Cytidine	胞苷	Nucleotides and derivatives	核苷酸及其衍生物	Nucleotides and derivatives	核苷酸及其衍生物	65-46-3	1797200	2313800	1353800	12354000	21306000	23263000	1.19823	0.0354781	0.135157	10.4163	3.38077	up
ML10180524	UPLC-MS/MS	C9H13N3O5	Cytarabine	胞嘧啶阿拉伯糖苷	Nucleotides and derivatives	核苷酸及其衍生物	Nucleotides and derivatives	核苷酸及其衍生物	147-94-4	639360	543300	888400	8613900	15941000	11880000	1.21079	0.0323094	0.132257	17.5924	4.13688	up
mws0976	UPLC-MS/MS	C9H12N2O6	β-Pseudouridine	β-假尿苷	Nucleotides and derivatives	核苷酸及其衍生物	Nucleotides and derivatives	核苷酸及其衍生物	1445-07-4	63865	73238	156750	263090	328870	594230	1.08673	0.0888807	0.186687	4.03668	2.01317	up
mws0248	UPLC-MS/MS	C9H12N2O6	Uridine	尿嘧啶核苷	Nucleotides and derivatives	核苷酸及其衍生物	Nucleotides and derivatives	核苷酸及其衍生物	58-96-8	591290	796700	1209300	2380600	3181400	3086000	1.15345	0.00404485	0.0894361	3.32962	1.73536	up
MWSmce295	UPLC-MS/MS	C9H12N2O6	1-beta-D-Arabinofuranosyluracil	1-β-D-阿糖呋喃脲嘧啶	Nucleotides and derivatives	核苷酸及其衍生物	Nucleotides and derivatives	核苷酸及其衍生物	3083-77-0	1653800	1561900	1827300	3789400	4312900	6231700	1.17117	0.0515141	0.156015	2.84236	1.50709	up
Lmhp002031	UPLC-MS/MS	C12H24N2O3	L-Leucyl-L-Leucine	L-亮氨酰-L-亮氨酸	Amino acids and derivatives	氨基酸及其衍生物	Amino acids and derivatives	氨基酸及其衍生物	3303-31-9	470640	959130	1029100	6226500	7856000	2765900	1.13202	0.0835775	0.183117	6.85209	2.77654	up
Lmrj002087	UPLC-MS/MS	C10H18N2O5	L-Isoleucyl-L-Aspartate	L-异亮氨酰-L-天冬氨酸	Amino acids and derivatives	氨基酸及其衍生物	Amino acids and derivatives	氨基酸及其衍生物	-	181140	285750	575160	1401000	1811000	1974900	1.13613	0.00397466	0.0894361	4.97759	2.31545	up
pme3961	UPLC-MS/MS	C10H13N5O3	2'-Deoxyadenosine	2'-脱氧腺苷	Nucleotides and derivatives	核苷酸及其衍生物	Nucleotides and derivatives	核苷酸及其衍生物	958-09-8	822890	708180	1182600	2994500	4460100	5843000	1.16944	0.0466065	0.152741	4.90023	2.29285	up
pme1187	UPLC-MS/MS	C10H14N2O6	5-Methyluridine	5-甲基尿苷	Nucleotides and derivatives	核苷酸及其衍生物	Nucleotides and derivatives	核苷酸及其衍生物	1463-10-1	9	9	9	10163	26408	20387	1.22234	0.0571315	0.160829	2109.56	11.0427	up
mws1090	UPLC-MS/MS	C6H13O9P	Glucose-1-phosphate	葡萄糖-1-磷酸	Others	其它类	Saccharides and Alcohols	糖及醇类	59-56-3	2841700	2491800	3388900	306760	405460	342050	1.21715	0.00959648	0.120327	0.120869	-3.04848	down
mws0866	UPLC-MS/MS	C6H13O9P	D-Glucose 6-phosphate	D-葡萄糖-6-磷酸	Others	其它类	Saccharides and Alcohols	糖及醇类	56-73-5	2453300	2319500	3163700	266150	351480	345800	1.21568	0.0117719	0.120616	0.121392	-3.04225	down
pme3313	UPLC-MS/MS	C6H13O9P	D-Fructose 6-phosphate	D-果糖-6-磷酸	Others	其它类	Saccharides and Alcohols	糖及醇类	643-13-0	1736400	942190	1419400	132620	113240	99859	1.21099	0.0322231	0.132257	0.0843631	-3.56724	down
Lmhp001732	UPLC-MS/MS	C14H18N2O3	L-Prolyl-L-Phenylalanine	L-脯氨酰-L-苯丙氨酸	Amino acids and derivatives	氨基酸及其衍生物	Amino acids and derivatives	氨基酸及其衍生物	13589-02-1	47706	51765	72671	153490	263840	160290	1.1557	0.057394	0.160972	3.35549	1.74652	up
Lmtn004049	UPLC-MS/MS	C15H20O4	Abscisic acid	脱落酸	Organic acids	有机酸	Organic acids	有机酸	21293-29-8	9213.5	6930.2	14598	453660	163160	402790	1.19425	0.0664578	0.170231	33.167	5.05168	up
Lmhp002001	UPLC-MS/MS	C14H20N2O3	L-Valyl-L-Phenylalanine	L-缬氨酰-L-苯丙氨酸	Amino acids and derivatives	氨基酸及其衍生物	Amino acids and derivatives	氨基酸及其衍生物	3918-92-1	473470	524750	885830	2288300	2778300	2150200	1.17513	0.00250368	0.0764643	3.83047	1.93752	up
pme0230	UPLC-MS/MS	C10H13N5O4	Adenosine	腺苷	Nucleotides and derivatives	核苷酸及其衍生物	Nucleotides and derivatives	核苷酸及其衍生物	58-61-7	4333400	4175900	5723200	13837000	18965000	13813000	1.19229	0.0180203	0.126849	3.27525	1.71161	up
pme1184	UPLC-MS/MS	C10H13N5O4	2'-Deoxyguanosine	2'-脱氧鸟苷	Nucleotides and derivatives	核苷酸及其衍生物	Nucleotides and derivatives	核苷酸及其衍生物	961-07-9	532100	468770	757760	1485400	1946900	2085700	1.17199	0.00938737	0.119506	3.13767	1.64969	up
pme2890	UPLC-MS/MS	C8H16N2O4S2	L-Homocystine	L-高胱氨酸	Amino acids and derivatives	氨基酸及其衍生物	Amino acids and derivatives	氨基酸及其衍生物	626-72-2	59736	82265	74140	173800	205930	149670	1.17936	0.0135954	0.120616	2.44933	1.29239	up
mws1175	UPLC-MS/MS	C16H14O4	Pinostrobin	球松素	Flavonoids	黄酮	Flavanones	二氢黄酮	480-37-5	1285.7	4181.8	10096	15166	31834	23559	1.00402	0.0424261	0.149323	4.53362	2.18066	up
mws1297	UPLC-MS/MS	C13H18O6	Benzyl glucoside	苄基葡萄糖苷	Phenolic acids	酚酸类	Phenolic acids	酚酸类	4304-12-5	9815.2	10472	1963	60464	34099	29805	1.04056	0.0614412	0.164118	5.58952	2.48273	up
pme2960	UPLC-MS/MS	C15H12O5	Naringenin chalcone; 2',4,4',6'-Tetrahydroxychalcone	柚皮素查耳酮	Flavonoids	黄酮	Chalcones	查耳酮	73692-50-9	9	9	9	3479000	5066000	865140	1.22161	0.124587	0.218352	348524	18.4109	up
pme0376	UPLC-MS/MS	C15H12O5	Naringenin (5,7,4'-Trihydroxyflavanone)	柚皮素	Flavonoids	黄酮	Flavanones	二氢黄酮	480-41-1	1511.4	5713.1	9124.6	9805200	14045000	5143100	1.21196	0.0640992	0.167436	1773.39	10.7923	up
mws0914	UPLC-MS/MS	C15H12O5	Pinobanksin	短叶松素	Flavonoids	黄酮	Flavanonols	二氢黄酮醇	548-82-3	9	1562.8	1576	1851400	2551800	610910	1.13619	0.0986394	0.196481	1592.89	10.6374	up
mws1038	UPLC-MS/MS	C11H22N2O4S	Pantetheine	泛酰巯基乙胺	Others	其它类	Others	其它	496-65-1	9	9	9	135910	126690	117800	1.22548	0.00169598	0.0710719	14088.9	13.7823	up
mws5035	UPLC-MS/MS	C15H22N2O3	L-Leucyl-L-phenylalanine	L-亮氨酰-L-苯丙氨酸	Amino acids and derivatives	氨基酸及其衍生物	Amino acids and derivatives	氨基酸及其衍生物	56217-82-4	4751.5	5724.1	14565	45469	74576	30480	1.11461	0.0765463	0.178936	6.01124	2.58766	up
MWSmce692	UPLC-MS/MS	C18H30O2	γ-Linolenic Acid	γ-亚麻酸	Lipids	脂质	Free fatty acids	游离脂肪酸	506-26-3	7606.3	8863.7	52448	212750	318120	224890	1.11871	0.0104049	0.120327	10.9661	3.45498	up
Lmbn005923	UPLC-MS/MS	C18H30O2	Crepenynic acid	顺式十八碳-9-烯-12-炔酸	Lipids	脂质	Free fatty acids	游离脂肪酸	2277-31-8	7632.9	12860	49349	230910	345600	261650	1.13783	0.00976261	0.120327	12.0008	3.58506	up
mws0629	UPLC-MS/MS	C13H16N2O5	L-Aspartyl-L-Phenylalanine	L-天冬氨酰-L-苯丙氨酸	Amino acids and derivatives	氨基酸及其衍生物	Amino acids and derivatives	氨基酸及其衍生物	13433-09-5	72043	85502	234890	438210	608260	647670	1.10416	0.0070948	0.109917	4.317	2.11003	up
Hmhp001812	UPLC-MS/MS	C11H15N5O4	2'-O-Methyladenosine	2-甲氧基腺苷	Nucleotides and derivatives	核苷酸及其衍生物	Nucleotides and derivatives	核苷酸及其衍生物	2140-79-6	112270	110090	150510	2138400	2820600	2899100	1.22067	0.00908585	0.118182	21.0746	4.39744	up
MWS4354	UPLC-MS/MS	C11H15N5O4	N6-methyladenosine	N6-甲基腺苷	Nucleotides and derivatives	核苷酸及其衍生物	Nucleotides and derivatives	核苷酸及其衍生物	1867-73-8	84659	58921	92726	1257700	2497900	2074200	1.21108	0.0359646	0.135157	24.6706	4.62472	up
pme1178	UPLC-MS/MS	C10H13N5O5	Guanosine	鸟苷	Nucleotides and derivatives	核苷酸及其衍生物	Nucleotides and derivatives	核苷酸及其衍生物	118-00-3	11014000	9191400	17596000	118630000	129100000	119440000	1.20876	2.35337e-05	0.00691567	9.71313	3.27994	up
MWSmce333	UPLC-MS/MS	C10H13N5O5	Crotonoside; 2-Hydroxyadenosine	巴豆苷; 2-羟基腺苷	Nucleotides and derivatives	核苷酸及其衍生物	Nucleotides and derivatives	核苷酸及其衍生物	1818-71-9	2522900	2165300	1860100	28081000	31484000	28338000	1.22187	0.00122804	0.0701746	13.4238	3.74672	up
mws1068	UPLC-MS/MS	C15H10O6	Kaempferol (3,5,7,4'-Tetrahydroxyflavone)	山奈酚	Flavonoids	黄酮	Flavonols	黄酮醇	520-18-3	13252	56175	91993	14023000	18894000	5296700	1.19233	0.0858519	0.184821	236.735	7.88713	up
mws0064	UPLC-MS/MS	C15H12O6	Eriodictyol (5,7,3',4'-Tetrahydroxyflavanone)	圣草酚	Flavonoids	黄酮	Flavanones	二氢黄酮	552-58-9	9	9	9	1070600	88711	24425	1.19418	0.363991	0.4385	43842.1	15.42	up
mws1094	UPLC-MS/MS	C15H12O6	Aromadendrin (DihydroKaempferol)	香橙素 (二氢山奈酚)	Flavonoids	黄酮	Flavanonols	二氢黄酮醇	480-20-6	9	9	9	60145	44013	40245	1.22501	0.0157044	0.121383	5348.26	12.3849	up
pmn001686	UPLC-MS/MS	C16H32O4	10,16-Dihydroxypalmitic acid	10,16-二羟基棕榈酸	Lipids	脂质	Free fatty acids	游离脂肪酸	3233-90-7	9	9	9	184880	271940	330900	1.2248	0.0251129	0.130844	29174.8	14.8324	up
pmb3081	UPLC-MS/MS	C6H11PO11	Glucarate O-Phosphoric acid	磷酸葡萄糖酸	Others	其它类	Saccharides and Alcohols	糖及醇类	-	14680000	18043000	13722000	3822500	2941100	6268300	1.15492	0.00318097	0.0815693	0.280588	-1.83348	down
mws0054	UPLC-MS/MS	C15H14O6	Catechin	儿茶素	Flavonoids	黄酮	Flavanols	黄烷醇类	154-23-4	407750	1627100	275610	9	9	9	1.21929	0.215286	0.298178	1.1686e-05	-16.3849	down
pmb0885	UPLC-MS/MS	C18H26O3	4-Oxo-9Z,11Z,13E,15E-Octadecatetraenoic Acid	4-氧化-9Z,11Z,13E,15E-十八碳四烯酸	Lipids	脂质	Free fatty acids	游离脂肪酸	-	9	9	9	158290	138860	262120	1.2243	0.0396399	0.144035	20713.7	14.3383	up
Zmpn003368	UPLC-MS/MS	C18H30O3	13S-Hydroxy-9Z,11E,15Z-octadecatrienoic acid	13S-羟基-9Z,11E,15Z-十八碳三烯酸	Lipids	脂质	Free fatty acids	游离脂肪酸	87984-82-5	8036.2	8172.3	26703	231340	257510	663710	1.17011	0.118028	0.212832	26.859	4.74733	up
pmb2792	UPLC-MS/MS	C18H30O3	13-Hydroxy-6,9,11-octadecatrienoic acid	13-羟基-6,9,11-十八碳三烯酸	Lipids	脂质	Free fatty acids	游离脂肪酸	74784-20-6	28160	38060	28986	56532	63242	72660	1.16157	0.00671537	0.109917	2.02124	1.01524	up
Lmbn005443	UPLC-MS/MS	C18H30O3	13-KODE; (9Z,11E)-13-Oxooctadeca-9,11-dienoic acid	13-氧代十八碳-9,11-二烯酸	Lipids	脂质	Free fatty acids	游离脂肪酸	54739-30-9	9	9	4992.1	36531	45076	86006	1.03088	0.0693537	0.171947	33.455	5.06415	up
pmb2786	UPLC-MS/MS	C18H30O3	9-Hydroxy-10,12,15-octadecatrienoic acid	9-羟基-10,12,15-十八碳三烯酸	Lipids	脂质	Free fatty acids	游离脂肪酸	89886-42-0	2164.4	2171.7	4650.6	33656	44123	80646	1.1882	0.072443	0.174301	17.6288	4.13986	up
pmb2787	UPLC-MS/MS	C18H30O3	9-Oxo-10E,12Z-octadecadienoic acid	9-过氧-10E,12Z-十八碳二烯酸	Lipids	脂质	Free fatty acids	游离脂肪酸	54232-59-6	9	9	9	88884	81018	236480	1.22186	0.115656	0.211492	15051.2	13.8776	up
pmb2799	UPLC-MS/MS	C18H32O3	12,13-Epoxy-9-Octadecenoic Acid	12,13-环氧-9-十八碳烯酸	Lipids	脂质	Free fatty acids	游离脂肪酸	6799-85-5	9036.1	12011	25197	37595	50851	95537	1.05812	0.110787	0.207444	3.97852	1.99223	up
Lmbn005662	UPLC-MS/MS	C18H32O3	9(10)-EpOME;(9R,10S)-(12Z)-9,10-Epoxyoctadecenoic acid	9,10-环氧十八烯酸	Lipids	脂质	Free fatty acids	游离脂肪酸	16833-56-0	36131	32928	126410	571470	655650	1387900	1.14626	0.0876636	0.18622	13.3782	3.74181	up
pmb0197	UPLC-MS/MS	C11H15N5O5	N7-Methylguanosine	N7-甲基鸟苷	Nucleotides and derivatives	核苷酸及其衍生物	Nucleotides and derivatives	核苷酸及其衍生物	20244-86-4	21210	22161	33408	615480	953630	646160	1.21795	0.0220609	0.130844	28.8526	4.85063	up
mws0724	UPLC-MS/MS	C10H13N5O6	8-Hydroxyguanosine	8-羟基鸟苷	Nucleotides and derivatives	核苷酸及其衍生物	Nucleotides and derivatives	核苷酸及其衍生物	3868-31-3	9	9	9	143320	207320	131010	1.22523	0.0210257	0.130844	17838.9	14.1227	up
Lmmn002230	UPLC-MS/MS	C15H8O7	Demethylwedelolactone	去甲基蟛蜞菊内酯	Lignans and Coumarins	木脂素和香豆素	Coumarins	香豆素	6468-55-9	35399	122060	369630	51480000	36811000	17595000	1.1867	0.0699378	0.172206	200.888	7.65025	up
MWSHY0009	UPLC-MS/MS	C16H12O6	Diosmetin (5,7,3'-Trihydroxy-4'-methoxyflavone)	香叶木素	Flavonoids	黄酮	Flavones	黄酮	520-34-3	9	9	3722.4	313320	112040	90078	1.08397	0.138308	0.228393	137.803	7.10646	up
Lmjp004941	UPLC-MS/MS	C16H12O6	Rhamnocitrin (7-MethylKaempferol)	鼠李柠檬素	Flavonoids	黄酮	Flavones	黄酮	569-92-6	2405.8	9	9	314340	124250	77972	1.09715	0.141276	0.230036	213.121	7.73553	up
MWS20189	UPLC-MS/MS	C16H12O6	Tectorigenin	鸢尾黄素	Flavonoids	黄酮	Isoflavones	异黄酮	548-77-6	3098.7	3599.3	3389.4	305120	129220	75218	1.19782	0.138565	0.228576	50.5143	5.65862	up
Zmhn001358	UPLC-MS/MS	C13H16O8	4-O-Glucosyl-4-hydroxybenzoic acid	4-O-葡萄糖基-4-羟基苯甲酸	Phenolic acids	酚酸类	Phenolic acids	酚酸类	-	81418	124000	51730	629670	389530	330970	1.14672	0.0512293	0.156015	5.25056	2.39247	up
Lmsn002247	UPLC-MS/MS	C13H16O8	1-O-Salicyloyl-β-D-glucose	1-O-水杨酰-β-D-葡萄糖	Phenolic acids	酚酸类	Phenolic acids	酚酸类	60517-74-0	84558	144910	189220	757170	418630	379360	1.10467	0.0793132	0.181506	3.71436	1.89312	up
MWS5235	UPLC-MS/MS	C18H36O3	12-Hydroxyoctadecanoic acid	12-羟基硬脂酸	Lipids	脂质	Free fatty acids	游离脂肪酸	106-14-9	873.29	2733.6	2939.7	38713	104970	28760	1.16369	0.146829	0.234008	26.3409	4.71923	up
pme3514	UPLC-MS/MS	C15H10O7	Morin	桑色素	Flavonoids	黄酮	Flavonols	黄酮醇	480-16-0	57474	261440	380270	48425000	60325000	32647000	1.19987	0.0279787	0.130964	202.231	7.65986	up
Zmpp002571	UPLC-MS/MS	C15H10O7	Robinetin	刺槐亭	Flavonoids	黄酮	Flavonols	黄酮醇	490-31-3	9	9	9	19238000	19797000	5110300	1.22345	0.0921315	0.190965	1.63501e+06	20.6409	up
mws1326	UPLC-MS/MS	C15H10O7	Herbacetin	草质素	Flavonoids	黄酮	Flavonols	黄酮醇	527-95-7	9	9	9	126030	167720	59894	1.22337	0.064176	0.167436	13097.9	13.6771	up
Hmcn002875	UPLC-MS/MS	C15H10O7	6-Hydroxyluteolin	6-羟基木犀草素	Flavonoids	黄酮	Flavones	黄酮	18003-33-3	9	9	10431	413980	532540	292860	1.06952	0.0271087	0.130844	118.612	6.89011	up
pme2954	UPLC-MS/MS	C15H10O7	Quercetin	槲皮素	Flavonoids	黄酮	Flavonols	黄酮醇	117-39-5	63414	42602	70456	5172100	6797600	2164100	1.20783	0.0755802	0.177574	80.0909	6.32357	up
Zmhn000892	UPLC-MS/MS	C13H18O8	4-O-Glucosyl-3,4-dihydroxybenzyl alcohol	4-O-葡萄糖基-3,4-二羟基苄醇	Phenolic acids	酚酸类	Phenolic acids	酚酸类	-	9	9	9	62992	26071	18014	1.22048	0.12333	0.217846	3965.81	11.9534	up
Hmqn000843	UPLC-MS/MS	C13H18O8	Tachioside	它乔糖苷	Phenolic acids	酚酸类	Phenolic acids	酚酸类	109194-60-7	2530000	2774600	1861200	107220	113000	48013	1.20504	0.0134127	0.120616	0.0374324	-4.73957	down
pmp000022	UPLC-MS/MS	C16H16O6	Oxypeucedanin hydrate	氧化前胡素水合物	Lignans and Coumarins	木脂素和香豆素	Coumarins	香豆素	2643-85-8	9	9	9	62623	132670	193650	1.22245	0.0757079	0.177641	14405.3	13.8143	up
mws0369	UPLC-MS/MS	C20H32O2	Arachidonic Acid	花生四烯酸	Lipids	脂质	Free fatty acids	游离脂肪酸	506-32-1	12360	26700	48302	9	9	9	1.2186	0.108247	0.20447	0.000309059	-11.6598	down
Zmyn004449	UPLC-MS/MS	C18H30O4	9-Hydroxy-12-oxo-10(E),15(Z)-octadecadienoic acid	9-羟基-12-氧代-10(E),15(Z)-十八碳二烯酸	Lipids	脂质	Free fatty acids	游离脂肪酸	-	5576	5909.5	25772	131760	105050	92084	1.13178	0.00447994	0.0906345	8.82759	3.14202	up
pmn001606	UPLC-MS/MS	C20H38O2	Eicosenoic acid	二十碳烯酸	Lipids	脂质	Free fatty acids	游离脂肪酸	26764-41-0	106210	91704	143750	16046	16744	9229	1.19549	0.0211795	0.130844	0.122983	-3.02346	down
Lmlp004754	UPLC-MS/MS	C14H17NO7	Ehretioside B	2-(葡萄糖基氧基)-4-羟基苯乙腈	Alkaloids	生物碱	Alkaloids	生物碱	156368-84-2	28276	26468	87588	170460	109660	155610	1.02805	0.0230919	0.130844	3.06136	1.61417	up
pme3967	UPLC-MS/MS	C12H17N5O5	2-(Dimethylamino)guanosine	2-(二甲基氨基)鸟苷	Nucleotides and derivatives	核苷酸及其衍生物	Nucleotides and derivatives	核苷酸及其衍生物	2140-67-2	135840	161640	155830	921870	1865000	1459800	1.20444	0.0435335	0.149909	9.36814	3.22776	up
Jmbn003691	UPLC-MS/MS	C15H20O7	3,4-dihydroxy-allylbenzene-3-O-β-D-glucopyranoside	3,4-二羟基烯丙基-3-O-β-D-葡萄吡喃糖苷	Others	其它类	Others	其它	-	75384	46428	78582	396420	244190	197070	1.14527	0.0678107	0.17079	4.18017	2.06356	up
Lmbn005287	UPLC-MS/MS	C18H32O4	7S,8S-DiHODE; (9Z,12Z)-(7S,8S)-Dihydroxyoctadeca-9,12-dienoic acid	7,8-二羟基-9,12-十八碳二烯酸	Lipids	脂质	Free fatty acids	游离脂肪酸	143288-65-7	87596	119020	188410	301660	423280	796710	1.07508	0.122739	0.217704	3.85202	1.94562	up
Lmbn004685	UPLC-MS/MS	C18H32O4	5S,8R-DiHODE; (5S,8R,9Z,12Z)-5,8-Dihydroxyoctadeca-9,12-dienoate	5,8-二羟基-9,12-十八碳二烯酸	Lipids	脂质	Free fatty acids	游离脂肪酸	-	4113.5	3348	4637.8	5394.5	9174.3	12866	1.00022	0.137457	0.227826	2.26747	1.18108	up
pmn001689	UPLC-MS/MS	C18H32O4	9-Hydroxy-12-oxo-15(Z)-octadecenoic acid	9-羟基-12-氧代-15(Z)-十八碳烯酸	Lipids	脂质	Free fatty acids	游离脂肪酸	-	2090.1	3407	6661.6	23499	18559	33634	1.14096	0.0321967	0.132257	6.22534	2.63815	up
MWS80006	UPLC-MS/MS	C18H32O4	9-Hydroperoxy-9Z,11E-Octadecadienoic Acid	9-过氧化羟基-9Z,11E-十八碳二烯酸	Lipids	脂质	Free fatty acids	游离脂肪酸	-	6344.9	2216.5	4349.8	71441	86590	130580	1.19356	0.034774	0.133947	22.3535	4.48243	up
mws1174	UPLC-MS/MS	C17H14O6	3-O-Acetylpinobanksin	3-O-乙酰短叶松黄烷酮	Flavonoids	黄酮	Flavanonols	二氢黄酮醇	52117-69-8	9	509.83	9	6978.4	24022	2653.7	1.07754	0.232492	0.314723	63.7594	5.99457	up
Lmmn002179	UPLC-MS/MS	C14H18O8	Methyl salicylate-2-O-glucoside	水杨酸甲酯-2-O-葡萄糖苷	Phenolic acids	酚酸类	Phenolic acids	酚酸类	10019-60-0	510700	1151600	640620	332130	382620	347970	1.00406	0.16819	0.254126	0.461466	-1.1157	down
Lmbn005487	UPLC-MS/MS	C18H34O4	12,13-DHOME; (9Z)-12,13-Dihydroxyoctadec-9-enoic acid	12,13-二羟基十八烷基-9-烯酸	Lipids	脂质	Free fatty acids	游离脂肪酸	263399-35-5	21285	13214	28150	120090	266070	201310	1.17817	0.0522637	0.1569	9.37716	3.22915	up
Zmzp006646	UPLC-MS/MS	C16H12O7	Capillarisin	茵陈色原酮	Others	其它类	Others	其它	56365-38-9	35336	193720	195220	18071000	20917000	20982000	1.1993	0.00226979	0.074624	141.347	7.14309	up
mws0066	UPLC-MS/MS	C16H12O7	Isorhamnetin	异鼠李素	Flavonoids	黄酮	Flavonols	黄酮醇	480-19-3	22309	83829	129400	11229000	15547000	20302000	1.20299	0.0270088	0.130844	199.874	7.64295	up
mws2627	UPLC-MS/MS	C16H12O7	Tamarixetin (3,3',5,7-Tetrahydroxy-4'-Methoxyflavone)	柽柳黄素	Flavonoids	黄酮	Flavonols	黄酮醇	603-61-2	7846.1	45365	50024	4275200	5707300	6107400	1.19659	0.0106843	0.120616	155.857	7.28408	up
pmb2871	UPLC-MS/MS	C13H16O9	1-O-Gentisoyl-β-D-glucoside	1-O-龙胆酰-β-D-葡萄糖	Phenolic acids	酚酸类	Phenolic acids	酚酸类	23445-11-6	6278600	6568200	3023100	18646000	14219000	12627000	1.09275	0.014506	0.120791	2.86656	1.51932	up
pmn001367	UPLC-MS/MS	C13H16O9	Protocatechuic acid-4-O-glucoside	原儿茶酸-4-O-葡萄糖苷	Phenolic acids	酚酸类	Phenolic acids	酚酸类	-	8727700	8632500	6330200	30123000	21072000	19944000	1.17115	0.033006	0.132257	3.00286	1.58634	up
Lmfp001509	UPLC-MS/MS	C13H16O9	1-O-Galloyl-rhamnose	1-O-没食子酰-鼠李糖	Tannins	鞣质	Tannin	鞣质	-	188860	275720	295360	65917	53731	100850	1.14943	0.0189347	0.130722	0.290152	-1.78512	down
pmn001553	UPLC-MS/MS	C14H20O8	Cimidahurinine	北升麻宁	Phenolic acids	酚酸类	Phenolic acids	酚酸类	142542-89-0	56349	95425	26052	522960	915850	275620	1.12028	0.109203	0.205687	9.64105	3.26919	up
Zmtn001661	UPLC-MS/MS	C14H20O8	Vanilloloside	香草醇苷	Phenolic acids	酚酸类	Phenolic acids	酚酸类	74950-96-2	5775200	5023900	2821500	18537000	13388000	11268000	1.11679	0.0307548	0.132208	3.17115	1.66501	up
Hmtn001120	UPLC-MS/MS	C14H20O8	5-(2-Hydroxyethyl)-2-O-glucosylphenol	5-(2-羟乙基)-2-O-葡萄糖基苯酚	Phenolic acids	酚酸类	Phenolic acids	酚酸类	-	18858	89193	6029.2	431030	748270	235530	1.06675	0.0969699	0.195574	12.4021	3.63251	up
pmb2221	UPLC-MS/MS	C18H39NO3	4-Hydroxysphinganine	4-羟基鞘氨醇	Lipids	脂质	Sphingolipids	鞘脂	554-62-1	130500	94462	129450	278190	304610	176020	1.08039	0.0646921	0.167486	2.14107	1.09833	up
Lmyp010328	UPLC-MS/MS	C20H30O3	2-Oxokovalenic acid	2-Oxokovalenic acid	Terpenoids	萜类	Ditepenoids	二萜	-	9	9	9	187580	224820	141850	1.22527	0.0164523	0.122032	20527.8	14.3253	up
mws0582	UPLC-MS/MS	C11H19N3O6S	S-(Methyl)glutathione	S-甲基谷胱甘肽	Amino acids and derivatives	氨基酸及其衍生物	Amino acids and derivatives	氨基酸及其衍生物	2922-56-7	440850	285470	296040	39229	29634	143650	1.07339	0.0147573	0.120956	0.207865	-2.26628	down
pme3188	UPLC-MS/MS	C9H13N2O9P	Uridine 5'-monophosphate	尿苷 5'-单磷酸	Nucleotides and derivatives	核苷酸及其衍生物	Nucleotides and derivatives	核苷酸及其衍生物	58-97-9	343360	532590	621890	1790700	1716800	1995500	1.18343	0.000337021	0.0336085	3.67396	1.87733	up
Lmbp003825	UPLC-MS/MS	C15H16O8	Skimmin (7-Hydroxycoumarin-7-O-glucoside)	茵芋苷	Lignans and Coumarins	木脂素和香豆素	Coumarins	香豆素	93-39-0	8564.7	12368	5804.8	342340	327740	28084	1.05375	0.160395	0.247344	26.1118	4.70663	up
MWSslk081	UPLC-MS/MS	C20H20O4	Bavachin	补骨脂二氢黄酮	Flavonoids	黄酮	Flavanones	二氢黄酮	19879-32-4	4094.7	9	9	270520	420990	208390	1.09529	0.0418322	0.148588	218.81	7.77354	up
Hmpp003624	UPLC-MS/MS	C20H20O4	1-(4-Hydroxyphenyl)-7-(3-methoxy-4-hydroxyphenyl)-4,6-heptadiene-3-one	1-(4-羟基苯基)-7-(3-甲氧基-4-羟基苯基)-4,6-庚二烯-3-酮	Phenolic acids	酚酸类	Phenolic acids	酚酸类	-	2088.9	9	3578.4	189240	194270	185890	1.03765	1.70067e-05	0.00610541	100.312	6.64835	up
Hmhn003067	UPLC-MS/MS	C15H18O8	Phenylpropionic acid-O-β-D-glucopyranoside	苯基丙酸-O-β-D-吡喃葡萄糖苷	Phenolic acids	酚酸类	Phenolic acids	酚酸类	-	430130	327790	184010	28043000	29231000	27620000	1.21744	0.0002255	0.0289123	90.1277	6.4939	up
Zmhn002301	UPLC-MS/MS	C15H18O8	p-Coumaric acid-4-O-glucoside	对香豆酸-4-O-葡萄糖苷	Phenolic acids	酚酸类	Phenolic acids	酚酸类	117405-48-8	385680	314970	180860	22272000	25173000	23061000	1.21843	0.00132716	0.0701746	79.9832	6.32163	up
Lmqn009304	UPLC-MS/MS	C19H18O5	Eucalyptin (5-Hydroxy-7,4'-dimethoxy-6,8-dimethylflavone)	桉树素	Flavonoids	黄酮	Flavones	黄酮	3122-88-1	9	9	9	18743	23615	24674	1.22523	0.00661955	0.109917	2482.67	11.2777	up
Lmsn000363	UPLC-MS/MS	C16H22O7	Raspberryketone glucoside	覆盆子苷	Phenolic acids	酚酸类	Phenolic acids	酚酸类	38963-94-9	1113300	477410	729050	4011200	2790900	11995000	1.08453	0.196921	0.280535	8.10304	3.01846	up
Jmzp008213	UPLC-MS/MS	C20H22O4	Dehydrodiisoeugenol	去氢二异丁香酚	Lignans and Coumarins	木脂素和香豆素	Lignans	木脂素	2680-81-1	9	9	9	54228	36099	651570	1.20216	0.345887	0.420439	27477.7	14.746	up
pmn001691	UPLC-MS/MS	C18H32O5	9,12,13-Trihydroxy-10,15-octadecadienoic acid	9,12,13-三羟基-10,15-十八碳二烯酸	Lipids	脂质	Free fatty acids	游离脂肪酸	-	8532.1	28900	73958	828810	861230	1622600	1.1556	0.0535716	0.157757	29.7391	4.89429	up
MWSHY0095	UPLC-MS/MS	C17H14O7	Tricin (5,7,4'-Trihydroxy-3',5'-dimethoxyflavone)	苜蓿素(麦黄酮)	Flavonoids	黄酮	Flavones	黄酮	520-32-1	9	9	9	316650	545190	76125	1.21825	0.14727	0.234292	34739.4	15.0843	up
Lmtn002565	UPLC-MS/MS	C14H18O9	1-O-Vanilloyl-D-Glucose	1-O-香草酰-D-葡萄糖	Phenolic acids	酚酸类	Phenolic acids	酚酸类	-	164220	338680	356550	137550	87649	79228	1.04745	0.0842931	0.183759	0.354211	-1.49732	down
Zmhn001883	UPLC-MS/MS	C14H18O9	Vanillic acid-4-O-glucoside	香草酸-4-O-葡萄糖苷	Phenolic acids	酚酸类	Phenolic acids	酚酸类	32142-31-7	412280	1030100	290630	9	17472	9	1.04296	0.129694	0.221223	0.0100923	-6.63061	down
Lmmn003663	UPLC-MS/MS	C14H18O9	5-Glucosyloxy-2-Hydroxybenzoic acid methyl ester	5-葡萄糖氧基-2-羟基苯甲酸甲酯	Phenolic acids	酚酸类	Phenolic acids	酚酸类	-	151550	341870	452750	111450	89076	74276	1.04366	0.123862	0.218186	0.290436	-1.78371	down
pmn001517	UPLC-MS/MS	C15H22O8	3,4,5-Trimethoxyphenyl-1-O-Glucoside	3,4,5-三甲氧基苯基-1-O-葡萄糖苷	Phenolic acids	酚酸类	Phenolic acids	酚酸类	-	37486000	58427000	39575000	113640000	106380000	94393000	1.15972	0.00263663	0.0764643	2.3206	1.2145	up
pmf0289	UPLC-MS/MS	C15H21N5O4	Riboprine	利波腺苷	Phenolic acids	酚酸类	Phenolic acids	酚酸类	7724-76-7	27455	19626	25794	175550	113890	106080	1.19464	0.0379246	0.139397	5.42738	2.44025	up
pmn001421	UPLC-MS/MS	C16H18O8	3-O-p-Coumaroylquinic acid	3-O-对香豆酰奎宁酸	Phenolic acids	酚酸类	Phenolic acids	酚酸类	87099-71-6	12167	10769	5097.8	2939500	2219200	4966600	1.21538	0.0548462	0.159561	361.182	8.49658	up
Hmcn004128	UPLC-MS/MS	C16H20O8	P-Methoyxcinnamate glucoside	对甲氧基桂皮酸葡萄糖苷	Lignans and Coumarins	木脂素和香豆素	Coumarins	香豆素	-	1715800	1843100	2398300	327720	424190	468800	1.20412	0.014398	0.120791	0.204913	-2.28691	down
Lman002731	UPLC-MS/MS	C15H18O9	Grevilloside F	银桦苷 F	Phenolic acids	酚酸类	Phenolic acids	酚酸类	1094004-50-8	50648	60435	91670	449190	584840	591920	1.20574	0.00641462	0.108002	8.01936	3.00349	up
Zmhn001793	UPLC-MS/MS	C15H18O9	6-O-Caffeoyl-D-glucose	6-O-咖啡酰-D-葡萄糖	Phenolic acids	酚酸类	Phenolic acids	酚酸类	-	208770	213350	477210	581290	819390	734690	1.04371	0.0238842	0.130844	2.3744	1.24756	up
Lmyn000503	UPLC-MS/MS	C13H12O11	Mucic acid-1,4-lactone-2-O-gallate	粘酸-1,4-内酯-2-O-没食子酸酯	Phenolic acids	酚酸类	Phenolic acids	酚酸类	-	24758	63535	24137	566790	381700	358110	1.18303	0.0229007	0.130844	11.6215	3.53872	up
mws0609	UPLC-MS/MS	C10H12N5O7P	Guanosine 3',5'-cyclic monophosphate	鸟苷 3',5'-环单磷酸	Nucleotides and derivatives	核苷酸及其衍生物	Nucleotides and derivatives	核苷酸及其衍生物	7665-99-8	187590	429680	504080	6781200	5810600	2518000	1.16582	0.0679771	0.17079	13.4747	3.75218	up
pmp001047	UPLC-MS/MS	C16H26O8	Jasminoside G	茉莉花苷 G	Terpenoids	萜类	Monoterpenoids	倍萜	871589-35-4	9	9	9	1562000	2358400	2969300	1.22491	0.0300615	0.132208	255174	17.9611	up
pmb0981	UPLC-MS/MS	C10H14N5O7P	Adenosine 5'-monophosphate	腺苷-5'-单磷酸	Nucleotides and derivatives	核苷酸及其衍生物	Nucleotides and derivatives	核苷酸及其衍生物	61-19-8	6247300	6047500	5825300	575430	811750	502120	1.21494	7.2912e-06	0.00327193	0.104265	-3.26167	down
pme1816	UPLC-MS/MS	C16H18O9	Neochlorogenic acid (5-O-Caffeoylquinic acid)*	新绿原酸 (5-O-咖啡酰奎宁酸)*	Phenolic acids	酚酸类	Phenolic acids	酚酸类	906-33-2	51017	44626	55925	726720	366540	168430	1.12375	0.151767	0.237582	8.32425	3.05732	up
mws2108	UPLC-MS/MS	C16H18O9	Cryptochlorogenic acid (4-O-Caffeoylquinic acid)*	隐绿原酸 (4-O-咖啡酰奎宁酸)*	Phenolic acids	酚酸类	Phenolic acids	酚酸类	905-99-7	5226400	7542800	2442300	17447000	23368000	9389400	1.00814	0.0887287	0.186687	3.30042	1.72265	up
mws0178	UPLC-MS/MS	C16H18O9	Chlorogenic acid (3-O-Caffeoylquinic acid)*	绿原酸 (3-O-咖啡酰奎宁酸)*	Phenolic acids	酚酸类	Phenolic acids	酚酸类	327-97-9	5449800	7727700	2408700	19537000	23388000	9469200	1.00258	0.0837449	0.183117	3.36158	1.74914	up
Zmhn002422	UPLC-MS/MS	C16H20O9	1-O-Feruloyl-β-D-glucose	1-O-阿魏酰-β-D-葡萄糖	Phenolic acids	酚酸类	Phenolic acids	酚酸类	7196-71-6	25118	10936	9010.5	1406200	2159500	453200	1.18762	0.115347	0.211489	89.1811	6.47867	up
Hmmn002544	UPLC-MS/MS	C16H20O9	Ferulic acid-4-O-glucoside	阿魏酸-4-O-葡萄糖苷	Phenolic acids	酚酸类	Phenolic acids	酚酸类	117405-51-3	87748	104980	104750	1250500	688190	388380	1.15743	0.115702	0.211492	7.82266	2.96766	up
Lmcp005293	UPLC-MS/MS	C20H20O6	6,7-Dimethoxy-2-[2-(3'-Hydroxy-4'-Methoxyphenyl)Ethyl]Chromone	6,7-二甲氧基-2-[2-(3-羟基-4-甲氧基)苯乙基]色酮	Others	其它类	Others	其它	-	136070	485340	280800	2071000	1029200	1241500	1.0939	0.0577612	0.161617	4.81229	2.26672	up
Zmdp006307	UPLC-MS/MS	C20H22O6	sanshodiol	sanshodiol	Lignans and Coumarins	木脂素和香豆素	Lignans	木脂素	-	439100	314570	430530	1520200	5058900	909980	1.02925	0.245588	0.326806	6.32417	2.66088	up
Hmlp003129	UPLC-MS/MS	C20H22O6	Matairesinol	罗汉松树脂醇	Lignans and Coumarins	木脂素和香豆素	Lignans	木脂素	580-72-3	397390	295270	396280	1266000	4826300	883610	1.02488	0.258394	0.338059	6.40615	2.67946	up
Lmdn004267	UPLC-MS/MS	C20H22O6	Epipinoresinol	表松脂醇	Lignans and Coumarins	木脂素和香豆素	Lignans	木脂素	24404-50-0	98822	113240	342800	3233700	3257000	1596800	1.16657	0.0422441	0.149252	14.5757	3.86549	up
mws0097	UPLC-MS/MS	C20H22O6	Pinoresinol	松脂醇	Lignans and Coumarins	木脂素和香豆素	Lignans	木脂素	487-36-5	106860	106400	347060	3558700	3828000	2125600	1.17788	0.0276521	0.130844	16.9765	4.08547	up
Lmyn000716	UPLC-MS/MS	C13H14O12	2-O-Galloylmucic acid	2-O-没食子酰基粘酸	Phenolic acids	酚酸类	Phenolic acids	酚酸类	-	630020	581790	280050	6036300	8096200	11093000	1.19607	0.0321456	0.132257	16.9088	4.0797	up
mws5040	UPLC-MS/MS	C12H21O11Na	Turanose	松二糖	Others	其它类	Saccharides and Alcohols	糖及醇类	547-25-1	643320	363910	601200	95839	85930	265550	1.06518	0.026455	0.130844	0.278109	-1.84628	down
Smjp005798	UPLC-MS/MS	C21H16O6	justicidin B	爵床脂素 B	Lignans and Coumarins	木脂素和香豆素	Lignans	木脂素	82001-16-9	7026.3	684650	37200	9	9	9	1.16915	0.386306	0.460438	3.70433e-05	-14.7204	down
Lmgp003270	UPLC-MS/MS	C16H16O10	Scopoletin-7-O-glucuronide	东莨菪内酯-7-O-葡萄糖醛酸苷	Lignans and Coumarins	木脂素和香豆素	Coumarins	香豆素	132752-65-9	2647500	3255500	3153400	19388000	16058000	13900000	1.21516	0.0129148	0.120616	5.44874	2.44592	up
Lmgn003073	UPLC-MS/MS	C17H20O9	5-O-Feruloylquinic acid*	5-O-阿魏酰奎尼酸*	Phenolic acids	酚酸类	Phenolic acids	酚酸类	-	101240	145500	134640	2683900	2089500	1865600	1.21931	0.0132257	0.120616	17.4078	4.12166	up
pma3724	UPLC-MS/MS	C17H20O9	1-O-Feruloylquinic acid*	1-O-阿魏酰奎宁酸*	Phenolic acids	酚酸类	Phenolic acids	酚酸类	-	2250400	2704800	2456400	17968000	12064000	11167000	1.20559	0.0336321	0.13268	5.55872	2.47475	up
Lmbp002309	UPLC-MS/MS	C17H22O9	Sinapaldehyde-4-O-Glucoside	芥子醛-4-O-葡萄糖苷	Phenolic acids	酚酸类	Phenolic acids	酚酸类	154461-65-1	1719300	7443400	6038200	7396.8	2266.3	1122.4	1.20161	0.0988424	0.196481	0.00070953	-10.4608	down
Hmgn004693	UPLC-MS/MS	C20H20O7	(8'R,7'S)-(-)-8-Hydroxy-α-conidendrin	羟基铁杉脂素	Lignans and Coumarins	木脂素和香豆素	Lignans	木脂素	-	49236	376730	30542	9	9	9	1.2076	0.308539	0.385137	5.91446e-05	-14.0454	down
Zmgp003492	UPLC-MS/MS	C20H20O7	8-Hydroxy-α-conidendrin	8-羟基-α-铁杉脂素	Lignans and Coumarins	木脂素和香豆素	Lignans	木脂素	-	224160	155650	212200	68896	58872	109460	1.1155	0.0130499	0.120616	0.400716	-1.31935	down
Lmap001661	UPLC-MS/MS	C17H24O9	Grevilloside C	银桦苷 C	Phenolic acids	酚酸类	Phenolic acids	酚酸类	1094004-47-3	403660	285470	316570	33127	39683	34873	1.21955	0.0134678	0.120616	0.107073	-3.22334	down
pmb0108	UPLC-MS/MS	C19H18O8	Feruloyl syringic acid	阿魏酰丁香酸	Phenolic acids	酚酸类	Phenolic acids	酚酸类	-	43516	26907	70073	129750	171720	145200	1.10918	0.00436702	0.0901011	3.17924	1.66868	up
mws1574	UPLC-MS/MS	C16H22O10	Geniposidic acid	京尼平苷酸	Terpenoids	萜类	Monoterpenoids	倍萜	27741-01-1	995540	742150	982610	69322	56294	56603	1.22145	0.0092064	0.11885	0.0669849	-3.90002	down
Lmdn001501	UPLC-MS/MS	C16H22O10	Gardoside	栀子新苷	Terpenoids	萜类	Monoterpenoids	倍萜	54835-76-6	951210	729780	967650	46592	61812	61918	1.22019	0.0082897	0.113588	0.0643055	-3.95892	down
mws0232	UPLC-MS/MS	C17H20N4O6	Riboflavin (Vitamin B2)	核黄素 (维生素 B2)	Others	其它类	Vitamin	维生素	83-88-5	3519600	4562600	7581300	1818500	1596600	2262900	1.09099	0.108329	0.20447	0.362499	-1.46395	down
Hmap007816	UPLC-MS/MS	C24H30O4	Feselol	Feselol	Lignans and Coumarins	木脂素和香豆素	Coumarins	香豆素	51020-36-1	9	3151.5	9	353860	392850	528210	1.12222	0.0151502	0.121219	402.246	8.65194	up
pme3337	UPLC-MS/MS	C14H17N5O8	Succinyladenosine	琥珀酰腺苷	Nucleotides and derivatives	核苷酸及其衍生物	Nucleotides and derivatives	核苷酸及其衍生物	4542-23-8	5086300	8745200	4199000	2252000	2900200	2884700	1.04168	0.135923	0.226329	0.445739	-1.16573	down
pmb3062	UPLC-MS/MS	C17H22O10	1-O-Eudesmoylquinic acid	1-O-菊酯酰奎宁酸	Phenolic acids	酚酸类	Phenolic acids	酚酸类	-	17173	4176.2	6190.6	36920	27678	33745	1.04837	0.0116067	0.120616	3.57094	1.8363	up
Zmhn002227	UPLC-MS/MS	C17H22O10	4-O-Glucosyl-sinapate	4-O-葡萄糖基芥子酸	Phenolic acids	酚酸类	Phenolic acids	酚酸类	-	199680	154160	191130	1190300	921210	1437000	1.20783	0.0206559	0.130844	6.51139	2.70296	up
HJN003	UPLC-MS/MS	C17H22O10	1-O-Sinapoyl-D-glucose	1-O-芥子酰-D-葡萄糖	Phenolic acids	酚酸类	Phenolic acids	酚酸类	-	31666	20047	9843.2	356230	781130	651820	1.19011	0.0442078	0.150498	29.0658	4.86125	up
Lmmp003215	UPLC-MS/MS	C19H30O8	Icariside B2	淫羊藿次苷 B2	Others	其它类	Others	其它	108906-51-0	6011.7	8206.5	2729	111340	24554	216990	1.08497	0.181709	0.264966	20.8226	4.38008	up
Cmdp003280	UPLC-MS/MS	C17H24O10	7-Dehydroxyzaluzioside	7-Dehydroxyzaluzioside	Terpenoids	萜类	Monoterpenoids	倍萜	-	9171.8	37811	9941	172660	113460	163370	1.13181	0.00809062	0.112579	7.89635	2.98119	up
Zmjp003597	UPLC-MS/MS	C19H32O8	Ampelopsisionoside	蛇葡萄紫罗兰酮糖苷	Others	其它类	Others	其它	-	36459	18436	10834	388850	688880	742140	1.19036	0.0330691	0.132257	27.6875	4.79116	up
Lmwp011196	UPLC-MS/MS	C24H38O4	Bis(2-ethylhexyl)phthalate	邻苯二甲酸二(2-乙基己基)酯	Phenolic acids	酚酸类	Phenolic acids	酚酸类	117-81-7	1704300	1378400	2283000	631130	209440	836050	1.01271	0.0232152	0.130844	0.31247	-1.67821	down
pmb0489	UPLC-MS/MS	C19H28N2O7	N-Glucosyl-p-coumaroylputrescine	N-葡萄糖基对香豆酰腐胺	Alkaloids	生物碱	Phenolamine	酚胺	-	11368	15417	10978	3898.8	3431.4	3923.2	1.2027	0.023648	0.130844	0.298001	-1.74661	down
pme2735	UPLC-MS/MS	C15H22N6O5S	S-Adenosyl-L-methionine	S-腺苷-L-蛋氨酸	Amino acids and derivatives	氨基酸及其衍生物	Amino acids and derivatives	氨基酸及其衍生物	29908-03-0	33057	85046	114150	275790	459100	208580	1.05846	0.0755069	0.177574	4.06225	2.02228	up
Cmbp005948	UPLC-MS/MS	C21H20O8	1-O-p-Hydroxycinnamoyl-3-O-caffeoylglycerol	1-O-对羟基肉桂酰基-3-O-咖啡酰甘油	Phenolic acids	酚酸类	Phenolic acids	酚酸类	-	16564	9	9	820170	698990	291400	1.04895	0.0645005	0.167486	109.188	6.77067	up
Hmbn005456	UPLC-MS/MS	C21H20O8	1-O-Caffeoyl-3-O-p-coumaroylglycerol	1-O-咖啡酰-3-O-对香豆酰甘油	Lipids	脂质	Glycerol ester	甘油酯	-	9	9	9	645590	120740	143920	1.21851	0.218393	0.301087	33713	15.041	up
Hmln003529	UPLC-MS/MS	C18H26O10	Benzyl β-primeveroside	苯甲酰樱草糖苷	Phenolic acids	酚酸类	Phenolic acids	酚酸类	130622-31-0	9	6995.8	9	127470	72694	78799	1.03716	0.0327071	0.132257	39.7734	5.31373	up
Cmjn004337	UPLC-MS/MS	C18H26O10	Benzyl-(2''-O-xylosyl)glucoside	苄基-(2''-O-木糖基)葡萄糖苷	Phenolic acids	酚酸类	Phenolic acids	酚酸类	-	865870	1506300	1645500	283700	369530	561750	1.10624	0.0480268	0.15322	0.302409	-1.72543	down
pme3007	UPLC-MS/MS	C9H14N2O12P2	Uridine 5'-diphosphate	尿苷 5'-二磷酸	Nucleotides and derivatives	核苷酸及其衍生物	Nucleotides and derivatives	核苷酸及其衍生物	27821-45-0	96441	84341	85650	27462	23740	25246	1.22098	0.00204384	0.074624	0.286933	-1.80122	down
pmd0153	UPLC-MS/MS	C19H39O7P	LysoPA 16:0	溶血卵磷脂酸 16:0	Lipids	脂质	Glycerol ester	甘油酯	22002-85-3	149560	285030	161930	9	9	9	1.22419	0.0441881	0.150498	4.52625e-05	-14.4313	down
Lmhn001773	UPLC-MS/MS	C19H13NO10	Caffeoylnicotinoyltartaric acid	咖啡酰烟酰酒石酸	Phenolic acids	酚酸类	Phenolic acids	酚酸类	-	127810	68303	90869	1113800	625140	261100	1.09276	0.14632	0.233891	6.96922	2.801	up
Cmbn003192	UPLC-MS/MS	C18H24O11	Regaloside K	王百合苷K	Phenolic acids	酚酸类	Phenolic acids	酚酸类	138772-00-6	102580	278970	138950	19201	23044	11500	1.16168	0.100985	0.197257	0.103256	-3.2757	down
Lmbp003668	UPLC-MS/MS	C20H18O10	Kaempferol-3-O-arabinoside	山奈酚-3-O-阿拉伯糖苷	Flavonoids	黄酮	Flavonols	黄酮醇	-	9	12595	14012	18518000	28803000	12101000	1.09893	0.0553969	0.16017	2232.57	11.1245	up
Zmbp003590	UPLC-MS/MS	C20H24O10	Rutarin	Rutarin	Lignans and Coumarins	木脂素和香豆素	Coumarins	香豆素	20320-81-4	10158	8930.2	3583.7	46270	51183	68361	1.15951	0.0132719	0.120616	7.31363	2.87059	up
mad1424	UPLC-MS/MS	C17H14O13	Ditartaroyl-hydroxycoumarin	二酒石酰-羟基香豆素	Lignans and Coumarins	木脂素和香豆素	Coumarins	香豆素	-	1711600	1723200	1317400	764840	670230	753200	1.18947	0.0194307	0.130844	0.460475	-1.1188	down
Lmhn204620	UPLC-MS/MS	C22H18O9	Bis(p-Coumaroyl)malic acid	二对香豆酰苹果酸	Phenolic acids	酚酸类	Phenolic acids	酚酸类	-	147250	111430	141460	9	9	9	1.22544	0.00685739	0.109917	6.74764e-05	-13.8553	down
Lmhn104620	UPLC-MS/MS	C22H18O9	p-Coumaroylcinnamoyltartaric acid	对香豆酰肉桂酰酒石酸	Phenolic acids	酚酸类	Phenolic acids	酚酸类	-	163230	129500	117680	9	9	9	1.22545	0.00980618	0.120327	6.57879e-05	-13.8918	down
pme2117	UPLC-MS/MS	C10H15N5O10P2	Adenosine 5'-diphosphate	腺苷-5'-二磷酸	Nucleotides and derivatives	核苷酸及其衍生物	Nucleotides and derivatives	核苷酸及其衍生物	58-64-0	48395	53214	65243	13804	13306	10282	1.20652	0.0104248	0.120327	0.224103	-2.15777	down
MWSHY0181	UPLC-MS/MS	C21H20O10	Apigenin-8-C-Glucoside (Vitexin)	芹菜素-8-C-葡萄糖苷 (牡荆素)	Flavonoids	黄酮	Flavones	黄酮	3681-93-4	9	9	9	165210	291370	82141	1.22267	0.0981403	0.19639	19952.6	14.2843	up
MWSHY0008	UPLC-MS/MS	C21H20O10	Isovitexin	异维新	Flavonoids	黄酮	Flavones	黄酮	38953-85-4	9	9	9	224770	352720	83585	1.22168	0.105157	0.201232	24484.3	14.5796	up
pme0321	UPLC-MS/MS	C21H20O10	Kaempferol-7-O-rhamnoside	山奈酚-7-O-鼠李糖苷	Flavonoids	黄酮	Flavonols	黄酮醇	20196-89-8	58033	142510	267610	12233000	10887000	4191400	1.18606	0.0692195	0.171852	58.3386	5.86638	up
pmp000413	UPLC-MS/MS	C21H20O10	Genistein-8-C-glucoside	染料木素-8-C-葡萄糖苷	Flavonoids	黄酮	Isoflavones	异黄酮	66026-80-0	9	9	2730.2	316480	380500	94552	1.10921	0.0935733	0.191911	288.018	8.17002	up
mws0919	UPLC-MS/MS	C21H20O10	Kaempferol-3-O-rhamnoside (Afzelin)(Kaempferin)	山奈酚-3-O-鼠李糖苷 (阿福豆苷)(番泻叶山奈苷)	Flavonoids	黄酮	Flavonols	黄酮醇	482-39-3	52375	115320	303750	46343000	33456000	45900000	1.20758	0.0100659	0.120327	266.625	8.05867	up
Lmfn004036	UPLC-MS/MS	C20H18O11	Morin-3-O-lyxoside	桑色素-3-O-来苏糖苷	Flavonoids	黄酮	Flavonols	黄酮醇	-	22888	32580	88881	17909000	30405000	28214000	1.21518	0.0221337	0.130844	530.16	9.05028	up
mws4183	UPLC-MS/MS	C20H18O11	Quercetin-3-O-arabinoside (Guaijaverin)	槲皮素-3-O-阿拉伯糖苷(番石榴苷)	Flavonoids	黄酮	Flavonols	黄酮醇	22255-13-6	17909	20829	90460	19934000	37358000	27791000	1.21071	0.0302208	0.132208	658.547	9.36314	up
Lmfn004065	UPLC-MS/MS	C20H18O11	Morin-3-O-arabinoside	桑色素-3-O-阿拉伯糖苷	Flavonoids	黄酮	Flavonols	黄酮醇	-	19453	40861	90819	21185000	34929000	28187000	1.21434	0.0194257	0.130844	557.793	9.12359	up
mws2186	UPLC-MS/MS	C20H18O11	Avicularin(Quercetin-3-O-α-L-arabinofuranoside)	扁蓄苷(广寄生苷)	Flavonoids	黄酮	Flavonols	黄酮醇	572-30-5	34920	36676	157240	60340000	79158000	46401000	1.2131	0.0227171	0.130844	812.368	9.66599	up
HJN087	UPLC-MS/MS	C21H22O10	Naringenin-4'-O-glucoside	柚皮素-4'-O-葡萄糖苷	Flavonoids	黄酮	Flavones	黄酮	-	9	9	4370.8	122140	119480	116790	1.07367	6.52134e-07	0.00117058	81.6647	6.35164	up
mws1179	UPLC-MS/MS	C21H22O10	Naringenin-7-O-glucoside (Prunin)	柚皮素-7-O-葡萄糖苷 (樱桃苷)	Flavonoids	黄酮	Flavanones	二氢黄酮	529-55-5	9	9	9	2172200	485440	336320	1.21923	0.23211	0.314667	110887	16.7587	up
HJN090	UPLC-MS/MS	C21H22O10	Butin-7-O-glucoside	紫铆素-7-O-葡萄糖苷	Flavonoids	黄酮	Flavones	黄酮	-	9	9	9	117710	120400	72832	1.22497	0.0214479	0.130844	11516.4	13.4914	up
Lmhp009187	UPLC-MS/MS	C20H42NO7P	LysoPE 15:0	溶血磷脂酰乙醇胺 15:0	Lipids	脂质	LPE	溶血磷脂酰乙醇胺	-	166170	287500	259010	57778	73543	49050	1.16951	0.0358886	0.135157	0.253088	-1.98229	down
Hmcp002316	UPLC-MS/MS	C21H20O11	Isorhamnetin-3-O-arabinoside	异鼠李素-3-O-阿拉伯糖苷	Flavonoids	黄酮	Flavonols	黄酮醇	-	5596.9	6024	21023	3886700	9591900	14075000	1.20895	0.0896135	0.18751	844.066	9.72121	up
Xmyp005654	UPLC-MS/MS	C21H20O11	Kaempferol-4'-O-glucoside	山奈酚-4'-O-葡萄糖苷	Flavonoids	黄酮	Flavonols	黄酮醇	-	26469	25885	463050	28780000	33157000	12931000	1.16082	0.0562342	0.160789	145.261	7.1825	up
MWSHY0136	UPLC-MS/MS	C21H20O11	Kaempferol-3-O-glucoside (Astragalin)	山奈酚-3-O-葡萄糖苷(紫云英苷)	Flavonoids	黄酮	Flavonols	黄酮醇	480-10-4	26447	44663	522570	32998000	52152000	16199000	1.165	0.0837542	0.183117	170.713	7.41543	up
mws0913	UPLC-MS/MS	C21H20O11	Kaempferol-3-O-galactoside (Trifolin)	山奈酚-3-O-半乳糖苷(三叶豆苷)	Flavonoids	黄酮	Flavonols	黄酮醇	23627-87-4	11874	2073.4	46719	1751800	3475500	1543200	1.15575	0.067382	0.170418	111.602	6.80222	up
MWS20150	UPLC-MS/MS	C21H20O11	Luteolin-7-O-glucoside (Cynaroside)	木犀草素-7-O-葡萄糖苷 (木犀草苷)	Flavonoids	黄酮	Flavones	黄酮	5373-11-5	2744.4	6560.3	60340	6834400	15224000	6464000	1.18104	0.0801601	0.181737	409.542	8.67787	up
Hmpp003270	UPLC-MS/MS	C21H20O11	Luteolin-4'-O-glucoside	木犀草素-4'-O-葡萄糖苷	Flavonoids	黄酮	Flavones	黄酮	6920-38-3	37033	77824	394760	27737000	51786000	16201000	1.18385	0.0939392	0.191911	187.835	7.55332	up
mws0089	UPLC-MS/MS	C21H20O11	Kaempferol-7-O-glucoside	山奈酚-7-O-葡萄糖苷	Flavonoids	黄酮	Flavonols	黄酮醇	16290-07-6	10098	3565.5	47452	1820400	3670200	1830000	1.17471	0.0588727	0.162558	119.783	6.90428	up
mws1361	UPLC-MS/MS	C21H22O11	Taxifolin-3-O-rhamnoside (Astilbin)	花旗松素-3-O-葡萄糖苷(落新妇苷)	Flavonoids	黄酮	Flavanonols	二氢黄酮醇	29838-67-3	9	9	9	2137400	75814	29765	1.18494	0.394575	0.466883	83073.3	16.3421	up
MWS20145	UPLC-MS/MS	C21H22O11	Eriodictyol-7-O-glucoside	圣草酚-7-O-葡萄糖苷	Flavonoids	黄酮	Flavanones	二氢黄酮	38965-51-4	15850	13405	13342	1912200	1740400	375610	1.1914	0.111857	0.208281	94.5656	6.56324	up
HJN086	UPLC-MS/MS	C21H22O11	Eriodictyol-3'-O-glucoside	圣草酚-3'-O-葡萄糖苷	Flavonoids	黄酮	Flavanones	二氢黄酮	-	9	9	9	3896300	89080	85356	1.19054	0.397107	0.468028	150768	17.202	up
Lmmn004625	UPLC-MS/MS	C21H22O11	Dihydrokaempferol-7-O-glucoside	二氢山奈酚-7-O-葡萄糖苷	Flavonoids	黄酮	Flavanonols	二氢黄酮醇	-	9	9	9	4656600	126970	86908	1.19172	0.396463	0.467577	180388	17.4607	up
Lmhp008763	UPLC-MS/MS	C21H42NO7P	LysoPE 16:1(2n isomer)	溶血磷脂酰乙醇胺 16:1(2n异构)	Lipids	脂质	LPE	溶血磷脂酰乙醇胺	-	82657	123660	201370	63941	13645	10728	1.0096	0.0733081	0.174984	0.216622	-2.20675	down
pmd0160	UPLC-MS/MS	C21H44NO7P	LysoPE 16:0(2n isomer)	溶血磷脂酰乙醇胺 16:0(2n异构)	Lipids	脂质	LPE	溶血磷脂酰乙醇胺	-	1105300	1163000	2457700	575510	574680	675370	1.05029	0.159215	0.246159	0.38628	-1.37228	down
MWS5083	UPLC-MS/MS	C17H21N4O9P	Flavin Single Nucleotide(FMN)	黄素单核苷酸(FMN)	Nucleotides and derivatives	核苷酸及其衍生物	Nucleotides and derivatives	核苷酸及其衍生物	6184-17-4	42193	54239	99854	137840	126830	197750	1.03363	0.0369667	0.137381	2.35585	1.23625	up
pmb0464	UPLC-MS/MS	C16H27NO14	L-Aspartic acid-O-diglucoside	L-天冬氨酸-O-二葡萄糖苷	Amino acids and derivatives	氨基酸及其衍生物	Amino acids and derivatives	氨基酸及其衍生物	-	76199	36811	32306	449820	485340	473180	1.19255	3.26045e-05	0.00731564	9.69157	3.27673	up
mad2085	UPLC-MS/MS	C22H18O11	Caffeoyl-p-coumaroyltartaric acid	咖啡酰对香豆酰酒石酸	Phenolic acids	酚酸类	Phenolic acids	酚酸类	-	10150	22354	9890.2	223040	565700	170460	1.17821	0.132354	0.222731	22.6257	4.49989	up
mws4167	UPLC-MS/MS	C21H18O12	Luteolin-7-O-glucuronide	木犀草素-7-O-葡萄糖醛酸苷	Flavonoids	黄酮	Flavones	黄酮	29741-10-4	7485.8	5803.5	5863.6	55254	13444	59716	1.05911	0.13186	0.222662	6.70468	2.74517	up
Lmzn001894	UPLC-MS/MS	C21H18O12	Kaempferol-3-O-glucuronide	山奈酚-3-O-葡萄糖醛酸苷	Flavonoids	黄酮	Flavonols	黄酮醇	22688-78-4	8765.2	5018	8751.8	9	9	9	1.22398	0.026524	0.130844	0.00119814	-9.70499	down
Lmdp003171	UPLC-MS/MS	C22H22O11	Azalein (Azaleatin-3-O-rhamnoside)	杜鹃黄苷	Flavonoids	黄酮	Flavonols	黄酮醇	29028-02-2	9	10591	127530	6437700	16914000	8689900	1.01547	0.0791143	0.181367	231.967	7.85778	up
pmb3012	UPLC-MS/MS	C22H22O11	Chrysoeriol-7-O-glucoside	金圣草黄素-7-O-葡萄糖苷	Flavonoids	黄酮	Flavones	黄酮	19993-32-9	9	9	9	290640	304350	226740	1.22543	0.00753725	0.109995	30434.4	14.8934	up
pmp000579	UPLC-MS/MS	C22H22O11	Diosmetin-7-O-galactoside	香叶木素-7-O-半乳糖苷	Flavonoids	黄酮	Flavones	黄酮	-	5598.4	1398.4	7689.8	1229400	1644700	722990	1.20071	0.0463662	0.152741	244.923	7.93619	up
Lmjp003655	UPLC-MS/MS	C22H22O11	6-C-MethylKaempferol-3-glucoside	6-甲基山奈酚-3-O-葡萄糖苷	Flavonoids	黄酮	Flavones	黄酮	-	5627.9	6009.7	4561.5	1283600	1771500	805010	1.2212	0.0442892	0.150498	238.292	7.89658	up
Hmmp004965	UPLC-MS/MS	C22H22O11	Diosmetin-7-O-glucoside	香叶木素-7-O-葡萄糖苷	Flavonoids	黄酮	Flavones	黄酮	20126-59-4	6312.3	1367.6	8007.8	1105400	1706500	795860	1.19853	0.0463994	0.152741	229.974	7.84533	up
Hmgp002189	UPLC-MS/MS	C22H22O11	Hispidulin-7-O-Glucoside	高车前素-7-O-葡萄糖苷	Flavonoids	黄酮	Flavones	黄酮	17680-84-1	6231.9	11417	2421.1	1311400	1651500	818460	1.20574	0.0352335	0.134849	188.409	7.55772	up
pmp001309	UPLC-MS/MS	C21H20O12	6-Hydroxykaempferol-7-O-glucoside	6-羟基山奈酚-7-O-葡萄糖苷	Flavonoids	黄酮	Flavonols	黄酮醇	-	6091.4	3030.9	2222.3	348270	882400	352260	1.20718	0.0980695	0.19639	139.532	7.12445	up
Lmdp003286	UPLC-MS/MS	C21H20O12	Isohyperoside	异金丝桃苷	Flavonoids	黄酮	Flavonols	黄酮醇	35589-21-0	42428	42504	21370	814430	2044200	479920	1.1783	0.151686	0.237582	31.4063	4.97298	up
mws0061	UPLC-MS/MS	C21H20O12	Quercetin-3-O-galactoside (Hyperin)	槲皮素-3-O-半乳糖苷 (金丝桃苷)	Flavonoids	黄酮	Flavonols	黄酮醇	482-36-0	396030	109170	302350	19206000	43556000	19041000	1.20013	0.0801869	0.181737	101.298	6.66246	up
Smgp004575	UPLC-MS/MS	C21H20O12	Quercetin-5-O-β-D-glucoside	槲皮素-5-O-β-D-葡萄糖苷	Flavonoids	黄酮	Flavonols	黄酮醇	-	27649	88082	32880	969120	2318600	469690	1.15297	0.161094	0.248048	25.2835	4.66013	up
mws1329	UPLC-MS/MS	C21H20O12	Quercetin-7-O-glucoside	槲皮素-7-O-葡萄糖苷	Flavonoids	黄酮	Flavonols	黄酮醇	491-50-9	208950	54566	155730	11664000	23541000	8953400	1.19852	0.0828265	0.18287	105.328	6.71875	up
mws0091	UPLC-MS/MS	C21H20O12	Quercetin-3-O-glucoside (Isoquercitrin)	槲皮素-3-O-葡萄糖苷(异槲皮苷)	Flavonoids	黄酮	Flavonols	黄酮醇	482-35-9	238910	67303	197580	14936000	35860000	9027000	1.19242	0.135792	0.22632	118.745	6.89173	up
pme1598	UPLC-MS/MS	C22H24O11	Hesperetin-5-O-glucoside	橙皮素-5-O-葡萄糖苷	Flavonoids	黄酮	Flavanonols	二氢黄酮醇	69651-80-5	206460	64367	161540	11578000	24417000	9355900	1.20238	0.0858099	0.184821	104.89	6.71273	up
pmd0130	UPLC-MS/MS	C22H46NO7P	LysoPC 14:0	溶血磷脂酰胆碱 14:0	Lipids	脂质	LPC	溶血磷脂酰胆碱	20559-16-4	343320	611330	376260	1241900	1654400	653160	1.01242	0.116371	0.211851	2.66694	1.41519	up
HJAP154	UPLC-MS/MS	C23H16O11	Galloylisorhamnetin	没食子酰异鼠李素	Flavonoids	黄酮	Flavonols	黄酮醇	-	9	9	9	251610	104780	88467	1.22268	0.103709	0.199782	16476.2	14.0081	up
Hmmp002121	UPLC-MS/MS	C23H16O11	Isorhamnetin-3-O-gallate	异鼠李素-3-O-没食子酸酯	Flavonoids	黄酮	Flavonols	黄酮醇	-	9	9	10029	274300	82519	105090	1.02876	0.130125	0.221223	45.9748	5.52277	up
Zmhn002508	UPLC-MS/MS	C21H28O12	4-p-Cumaroyl-rhamnosyl-(1→6)-D-glucose	4-对香豆酰鼠李糖基-(1→6)-D-葡萄糖	Phenolic acids	酚酸类	Phenolic acids	酚酸类	-	3739.6	3711.6	7860.5	98503	290570	41350	1.14196	0.20778	0.292292	28.1107	4.81305	up
Lmzn006169	UPLC-MS/MS	C30H48O4	Pomolic acid	坡模酸	Terpenoids	萜类	Triterpene	三萜	13849-91-7	305800	527940	437730	35949000	20578000	26392000	1.21869	0.0260317	0.130844	65.2151	6.02713	up
Lmzn206284	UPLC-MS/MS	C30H48O4	Terminic acid	Terminic acid	Terpenoids	萜类	Triterpene	三萜	-	426910	484010	510340	34716000	19842000	25720000	1.22095	0.0260188	0.130844	56.4837	5.81976	up
Hmbn005207	UPLC-MS/MS	C30H48O4	hederagenin	常春藤皂苷元	Terpenoids	萜类	Triterpene Saponin	三萜皂苷	465-99-6	9	12292	9	557660	1013800	508960	1.07756	0.0502387	0.156015	169.002	7.4009	up
pmn001705	UPLC-MS/MS	C30H48O4	3,24-Dihydroxy-17,21-semiacetal-12(13)oleanolic fruit	3,24-二羟基-17,21-半缩醛基-12(13)齐墩果	Terpenoids	萜类	Triterpene	三萜	-	285160	480070	473210	32917000	20651000	26183000	1.21939	0.0178473	0.126624	64.3963	6.00891	up
Lmsn012425	UPLC-MS/MS	C30H48O4	Rubusic acid (3β,7α-Dihydroxyolean-12-en-28-oic acid)	3β,7α-二羟基齐墩果-12-烯-28-酸	Terpenoids	萜类	Triterpene	三萜	23984-26-1	341140	580790	473270	47797000	27966000	34861000	1.21974	0.0245379	0.130844	79.289	6.30905	up
Smpn011792	UPLC-MS/MS	C30H48O4	2,3-dihydroxy-12-ursen-28-oic acid	2,3-二羟基-12-熊果烯-28-酸	Terpenoids	萜类	Triterpene	三萜	-	21022	30255	134640	9	9	9	1.2139	0.231082	0.313804	0.000145226	-12.7494	down
pmb1912	UPLC-MS/MS	C20H23N7O7	10-Formyltetrahydrofolic Acid	10-甲酰四氢叶酸	Alkaloids	生物碱	Alkaloids	生物碱	2800-34-2	1117600	737010	776030	433150	375810	318550	1.14889	0.0452719	0.151328	0.428607	-1.22227	down
mws1714	UPLC-MS/MS	C22H18O12	Chicoric Acid	菊苣酸	Phenolic acids	酚酸类	Phenolic acids	酚酸类	70831-56-0	373200	246860	780740	9954.5	11101	27174	1.18234	0.107292	0.203628	0.03443	-4.86019	down
Lmhp008801	UPLC-MS/MS	C23H42NO7P	LysoPE 18:3	溶血磷脂酰乙醇胺 18:3	Lipids	脂质	LPE	溶血磷脂酰乙醇胺	-	9	9	9	218000	544960	324330	1.22426	0.0638957	0.167435	40270	15.2974	up
Lmhp008589	UPLC-MS/MS	C23H42NO7P	LysoPE 18:3(2n isomer)	溶血磷脂酰乙醇胺 18:3(2n异构)	Lipids	脂质	LPE	溶血磷脂酰乙醇胺	-	9	15201	9	262340	587590	371960	1.05089	0.0516829	0.156015	80.2871	6.3271	up
Hmcp002207	UPLC-MS/MS	C22H22O12	Isorhamnetin-7-O-glucoside (Brassicin)	异鼠李素-7-O-葡萄糖苷 (蔓菁苷)	Flavonoids	黄酮	Flavonols	黄酮醇	6743-96-0	6387	14358	35004	342680	2709600	742380	1.14915	0.230532	0.313719	68.0669	6.08888	up
Lmjp003044	UPLC-MS/MS	C22H22O12	Isorhamnetin-3-O-Glucoside	异鼠李素-3-O-葡萄糖苷	Flavonoids	黄酮	Flavonols	黄酮醇	5041-82-7	9676	19255	51891	344270	2428800	1155600	1.14467	0.168751	0.254331	48.6089	5.60315	up
Lmjp002906	UPLC-MS/MS	C22H22O12	Rhamnetin-3-O-Glucoside	鼠李素-3-O-葡萄糖苷	Flavonoids	黄酮	Flavonols	黄酮醇	27875-34-9	12554	18320	48110	342010	2697900	1227700	1.14987	0.179155	0.262946	54.0313	5.75572	up
mws1454	UPLC-MS/MS	C23H26O11	Persicoside	桃苷	Flavonoids	黄酮	Flavanones	二氢黄酮	28978-03-2	9	9	9	18725	54274	27022	1.2224	0.089987	0.187822	3704.48	11.8551	up
Lmpp003296	UPLC-MS/MS	C21H19O13+	Delphinidin-3-O-glucuronide	飞燕草素-3-O-葡萄糖醛酸苷	Flavonoids	黄酮	Anthocyanidins	花青素	-	18261	2539	5212.5	839.96	1732.5	818.72	1.00401	0.260447	0.340001	0.130367	-2.93935	down
pmb2260	UPLC-MS/MS	C23H46NO7P	LysoPC 15:1	溶血磷脂酰胆碱 15:1	Lipids	脂质	LPC	溶血磷脂酰胆碱	-	101510	176610	119380	37154	64838	40556	1.10706	0.0498486	0.156015	0.358611	-1.47951	down
pmb0856	UPLC-MS/MS	C23H46NO7P	LysoPE 18:1(2n isomer)	溶血磷脂酰乙醇胺 18:1(2n异构)	Lipids	脂质	LPE	溶血磷脂酰乙醇胺	-	442930	989010	1368200	193800	148520	224670	1.10544	0.108258	0.20447	0.202486	-2.3041	down
mws0289	UPLC-MS/MS	C23H46NO7P	LysoPE 18:1	溶血磷脂酰乙醇胺 18:1	Lipids	脂质	LPE	溶血磷脂酰乙醇胺	89576-29-4	799320	1761300	1919100	403430	475030	421700	1.09818	0.0933599	0.191911	0.290232	-1.78472	down
Lmln001856	UPLC-MS/MS	C21H20O13	5,7-Dihydroxy-4-oxo-2-(3,4,5-trihydroxyphenyl)-4H-chromen-3-yl-alloside	5,7-二羟基-4-氧代-2-(3,4,5-三羟基苯基)-4H-色烯-3-基-阿洛糖苷	Others	其它类	Others	其它	-	64384	66552	40498	9	9	9	1.22481	0.0206819	0.130844	0.000157495	-12.6324	down
pmb2319	UPLC-MS/MS	C23H48NO7P	LysoPC 15:0	溶血磷脂酰胆碱 15:0	Lipids	脂质	LPC	溶血磷脂酰胆碱	108273-89-8	2173800	4340500	3273700	1409700	1284400	1090200	1.10556	0.0822986	0.18287	0.386626	-1.37099	down
Lmhp009129	UPLC-MS/MS	C23H48NO7P	LysoPC 15:0(2n isomer)	溶血磷脂酰胆碱 15:0(2n异构)	Lipids	脂质	LPC	溶血磷脂酰胆碱	-	160920	286850	401760	67473	102690	37324	1.06458	0.0823803	0.18287	0.244237	-2.03364	down
pmb3066	UPLC-MS/MS	C22H26O12	5-O-p-Coumaroylshikimic acid O-glucoside	5-O-对香豆酰莽草酸-O-葡萄糖苷	Phenolic acids	酚酸类	Phenolic acids	酚酸类	-	11283	4553.5	5476.6	21666	25814	31868	1.12082	0.00795832	0.112482	3.72297	1.89645	up
Hmyn007081	UPLC-MS/MS	C22H43O9P	LysoPG 16:1	溶血磷脂酰甘油 16:1	Lipids	脂质	Glycerol ester	甘油酯	-	4692.5	6508.8	6818	711190	738350	1130000	1.2221	0.024201	0.130844	143.154	7.16143	up
Lmmn003398	UPLC-MS/MS	C23H22O12	Kaempferol-3-O-(6''-acetyl)glucoside	山奈酚-3-O-(6''-O-乙酰)葡萄糖苷	Flavonoids	黄酮	Flavonols	黄酮醇	-	16668	30339	150200	729620	1974700	1332500	1.13121	0.0687053	0.171049	20.47	4.35544	up
pma1303	UPLC-MS/MS	C24H46NO7P	LysoPC 16:2	溶血磷脂酰胆碱 16:2	Lipids	脂质	LPC	溶血磷脂酰胆碱	-	20160	29777	18764	74977	50743	47652	1.12476	0.041523	0.147885	2.52357	1.33547	up
Lmsn002937	UPLC-MS/MS	C22H22O13	1-O-Caffeoyl-6-O-galloyl-β-D-glucose	1-O-咖啡酰-6-O-没食子酰-β-D-葡萄糖	Phenolic acids	酚酸类	Phenolic acids	酚酸类	-	7792.2	8589.4	104450	9	9	9	1.19545	0.336262	0.412853	0.000223451	-12.1278	down
Lmtn002997	UPLC-MS/MS	C22H22O13	Mearnsetin-3-O-glucoside	3,5,7,3',5'-五羟基-4'-甲氧基黄酮-3-O-葡萄糖苷	Flavonoids	黄酮	Flavones	黄酮	-	27779	62998	25836	3165700	11665000	909840	1.15963	0.252697	0.333033	134.981	7.07661	up
pmn001642	UPLC-MS/MS	C23H20O13	Kaempferol-3-O-(2''-O-acetyl)glucuronide	山奈酚-3-O-(2''-O-乙酰)葡萄糖醛酸苷	Flavonoids	黄酮	Flavonols	黄酮醇	-	43293	53011	50738	2784300	1278000	1256500	1.21148	0.0763293	0.178866	36.172	5.1768	up
pmb3000	UPLC-MS/MS	C24H24O12	Chrysoeriol-7-O-(6''-acetyl)glucoside	金圣草黄素-7-O-(6''-乙酰)葡萄糖苷	Flavonoids	黄酮	Flavones	黄酮	-	4237.5	5222	979.04	125650	44415	35220	1.12398	0.151987	0.237582	19.6661	4.29764	up
Lmsn002288	UPLC-MS/MS	C21H28O14	1-O-Caffeoyl-(6-O-glucosyl)-β-D-glucose	1-O-咖啡酰-6-O-葡萄糖基-β-D-葡萄糖	Phenolic acids	酚酸类	Phenolic acids	酚酸类	-	254190	298840	447270	6380200	8863900	7097500	1.21731	0.010233	0.120327	22.3349	4.48123	up
pmp001141	UPLC-MS/MS	C25H31NO10	Cimicifugamide	升麻酰胺	Alkaloids	生物碱	Phenolamine	酚胺	-	4281.5	6406.8	1240.4	60148	15076	39064	1.06938	0.118122	0.212832	9.58093	3.26017	up
Hmln002199	UPLC-MS/MS	C23H22O13	Quercetin-3-O-(6''-O-acetyl)galactoside	槲皮素-3-O-(6''-O-乙酰)半乳糖苷	Flavonoids	黄酮	Flavonols	黄酮醇	-	168120	43395	133940	2361200	2632700	1280300	1.16729	0.0400463	0.144926	18.1621	4.18286	up
Lmhp009773	UPLC-MS/MS	C27H46O9	1-α-Linolenoyl-glycerol-3-O-glucoside	1-α-亚麻酸甘油酯-3-O-葡萄糖苷	Lipids	脂质	Glycerol ester	甘油酯	-	8258.1	3642.2	5567.2	45213	43142	22361	1.15433	0.0468613	0.152759	6.3384	2.66412	up
Hmqp006235	UPLC-MS/MS	C26H46NO7P	LysoPC 18:4	溶血磷脂酰胆碱 18:4	Lipids	脂质	LPC	溶血磷脂酰胆碱	-	84427	187470	284480	74703	38420	43252	1.00646	0.142614	0.230216	0.281059	-1.83105	down
pmb0865	UPLC-MS/MS	C26H48NO7P	LysoPC 18:3(2n isomer)	溶血磷脂酰胆碱 18:3(2n异构)	Lipids	脂质	LPC	溶血磷脂酰胆碱	-	234310	248430	119800	4870700	5951900	2713900	1.19905	0.0452075	0.151328	22.4657	4.48965	up
pmb0854	UPLC-MS/MS	C26H48NO7P	LysoPC 18:3	溶血磷脂酰胆碱 18:3	Lipids	脂质	LPC	溶血磷脂酰胆碱	-	259740	427730	252710	3863700	5223100	2849300	1.20528	0.0326833	0.132257	12.6955	3.66625	up
Smhp002357	UPLC-MS/MS	C26H30O11	tortoside f	tortoside f	Lignans and Coumarins	木脂素和香豆素	Lignans	木脂素	-	377240	239870	411980	70547	38676	148920	1.07217	0.0204472	0.130844	0.250846	-1.99513	down
pmp000682	UPLC-MS/MS	C26H32O11	Matairesinol-4'-O-glucoside (Matairesinoside)	罗汉松脂酚-4'-O-葡萄糖苷 (罗汉松树脂酚苷)	Lignans and Coumarins	木脂素和香豆素	Lignans	木脂素	23202-85-9	370840	934080	590670	5125800	87305000	11959000	1.09167	0.32391	0.399875	55.0698	5.78319	up
pmn001378	UPLC-MS/MS	C26H32O11	Pinoresinol-4-O-glucoside	松脂醇-4-O-葡萄糖苷	Lignans and Coumarins	木脂素和香豆素	Lignans	木脂素	41607-20-9	27991	48032	26796	12689000	8446100	5988700	1.21959	0.0441058	0.150498	263.801	8.04331	up
pmp001281	UPLC-MS/MS	C26H52NO7P	LysoPC 18:1	溶血磷脂酰胆碱 18:1	Lipids	脂质	LPC	溶血磷脂酰胆碱	-	6091900	12021000	13021000	3727500	3987800	3306900	1.09081	0.0889735	0.186687	0.354026	-1.49807	down
pmb3041	UPLC-MS/MS	C23H22O14	Tricin-7-O-saccharic acid	苜蓿素-7-O-葡萄糖二酸苷	Flavonoids	黄酮	Flavones	黄酮	-	94819	86218	118170	1421100	2545100	1688800	1.21542	0.0341234	0.133947	18.9	4.24031	up
pmn001710	UPLC-MS/MS	C24H26O13	Rosmarinic acid-3'-O-glucoside	迷迭香酸-3'-O-葡萄糖苷	Phenolic acids	酚酸类	Phenolic acids	酚酸类	910028-78-3	174820	101660	76328	346960	473110	473930	1.13826	0.00522289	0.0986852	3.66772	1.87488	up
Jmzn003632	UPLC-MS/MS	C26H34O11	Manglieside D	Manglieside D	Lignans and Coumarins	木脂素和香豆素	Lignans	木脂素	-	200680	67645	142540	1543400	2835900	1745600	1.18251	0.0405546	0.145775	14.9073	3.89795	up
Cmsp005051	UPLC-MS/MS	C26H34O11	Isolariciresinol-9-O-glucoside	异落叶松脂素-9-O-葡萄糖苷	Lignans and Coumarins	木脂素和香豆素	Lignans	木脂素	-	304470	343020	398690	62728	43406	23989	1.18171	0.0032479	0.0821124	0.124379	-3.00718	down
Lmmn002274	UPLC-MS/MS	C26H34O11	Isolariciresinol-9'-O-glucoside	异落叶松脂素-9'-O-葡萄糖苷	Lignans and Coumarins	木脂素和香豆素	Lignans	木脂素	63358-12-3	27932	66014	10160	170420	363950	374490	1.09471	0.0488949	0.154247	8.73014	3.126	up
Lmtn002596	UPLC-MS/MS	C26H34O11	Dihydrodehydrodiconiferyl alcohol-4-O-glucoside	二氢脱氢二松柏醇-4-O-葡萄糖苷	Lignans and Coumarins	木脂素和香豆素	Lignans	木脂素	-	51058	46645	58809	154880	319160	408860	1.15276	0.082448	0.18287	5.6411	2.49598	up
Jmzn003343	UPLC-MS/MS	C26H34O11	Saikolignanoside A	Saikolignanoside A	Lignans and Coumarins	木脂素和香豆素	Lignans	木脂素	-	187280	54369	46364	12146000	14944000	14554000	1.20605	0.00392373	0.0894361	144.591	7.17583	up
Lmtn003096	UPLC-MS/MS	C26H36O11	Secoisolariciresinol 4-O-glucoside	开环异落叶松脂酚-4-O-葡萄糖苷	Lignans and Coumarins	木脂素和香豆素	Lignans	木脂素	-	628300	697740	880360	3238800	16003000	3309400	1.08715	0.251056	0.331846	10.2208	3.35344	up
Lmhn003801	UPLC-MS/MS	C25H24O13	Feruloylsinapoyltartaric acid	阿魏酰芥子酰酒石酸	Phenolic acids	酚酸类	Phenolic acids	酚酸类	-	9	9	9	67806	51291	237200	1.21851	0.183643	0.266213	13196.2	13.6878	up
Lmhp007840	UPLC-MS/MS	C27H52NO7P	LysoPC 19:2	溶血磷脂酰胆碱 19:2	Lipids	脂质	LPC	溶血磷脂酰胆碱	-	38839	93469	111340	9635.3	15147	4906.5	1.11767	0.0795653	0.181704	0.121851	-3.03681	down
Lmdp004892	UPLC-MS/MS	C24H22O14	Kaempferol-3-O-(6''-malonyl)galactoside	山奈酚-3-O-(6''-丙二酰)半乳糖苷	Flavonoids	黄酮	Flavonols	黄酮醇	-	68412	144330	527340	5646100	8342500	3534100	1.15139	0.0552794	0.16017	23.6767	4.5654	up
Lmmp003817	UPLC-MS/MS	C24H22O14	Kaempferol-3-O-(6''-malonyl)glucoside	山奈酚-3-O-(6''-丙二酰)葡萄糖苷	Flavonoids	黄酮	Flavonols	黄酮醇	-	54436	119970	554670	6633900	10196000	3563900	1.14018	0.0749081	0.177154	27.9721	4.80592	up
Lmhp010908	UPLC-MS/MS	C27H54NO7P	LysoPC 19:1	溶血磷脂酰胆碱 19:1	Lipids	脂质	LPC	溶血磷脂酰胆碱	-	363310	373520	370080	37909	24186	25507	1.21825	1.4789e-06	0.00132731	0.079141	-3.65943	down
Zmfn000481	UPLC-MS/MS	C14H22N2O16P2	Uridine-5'-Diphosphate-D-Xylose	尿苷-5'-二磷酸-D-木糖	Nucleotides and derivatives	核苷酸及其衍生物	Nucleotides and derivatives	核苷酸及其衍生物	3616-06-6	206110	279120	186950	128210	94421	68889	1.09099	0.0258046	0.130844	0.433693	-1.20525	down
Lmdn001925	UPLC-MS/MS	C26H34O12	Olivil-4'-O-glucoside	橄榄树脂素-4'-O-葡萄糖苷	Lignans and Coumarins	木脂素和香豆素	Lignans	木脂素	76880-93-8	24678	40886	63695	747510	945220	1355700	1.20229	0.0318183	0.132208	23.5839	4.55973	up
Zmdn003480	UPLC-MS/MS	C26H34O12	Cycloolivil-6-O-glucoside	环橄榄树脂素-6-O-葡萄糖苷	Lignans and Coumarins	木脂素和香豆素	Lignans	木脂素	-	10529	27610	23518	174420	327870	90056	1.12988	0.125423	0.218789	9.60712	3.2641	up
pmb0608	UPLC-MS/MS	C25H24O14	Chrysoeriol-7-O-(6''-malonyl)glucoside	金圣草黄素-7-O-(6''-丙二酰)葡萄糖苷	Flavonoids	黄酮	Flavones	黄酮	-	215.66	9	10854	189390	382450	147970	1.04188	0.0818154	0.18287	64.9727	6.02176	up
pmp000980	UPLC-MS/MS	C27H32O12	Maohuoside A	茂藿苷 A	Flavonoids	黄酮	Flavonols	黄酮醇	128988-55-6	17547	28773	8083.3	92736	90908	112330	1.13195	0.000977727	0.0650007	5.44037	2.4437	up
pmp000589	UPLC-MS/MS	C24H22O15	Quercetin-7-O-(6''-malonyl)glucoside	槲皮素-7-O-(6''-丙二酰)葡萄糖苷	Flavonoids	黄酮	Flavonols	黄酮醇	-	468920	162190	260230	6921600	5441200	1779300	1.14366	0.101264	0.197361	15.8661	3.98788	up
mws1138	UPLC-MS/MS	C24H26N2O13	Betanin (Betanidin-5-O-glucoside)	甜菜红苷 (甜菜苷-5-O-葡萄糖苷)	Alkaloids	生物碱	Plumerane	吲哚类生物碱	7659-95-2	520700	147340	252480	6799100	4429900	1685300	1.12835	0.112938	0.20937	14.0294	3.81038	up
Lmmn002260	UPLC-MS/MS	C27H36O12	5'-Methoxyisolariciresinol-9'-O-glucoside	5'-甲氧基异落叶松脂醇-9'-O-葡萄糖苷	Lignans and Coumarins	木脂素和香豆素	Lignans	木脂素	-	853650	1023600	691300	451510	199980	343360	1.08325	0.0141068	0.120616	0.38732	-1.3684	down
pmn001365	UPLC-MS/MS	C27H24O13	Salvianolic acid K	丹酚酸 K	Phenolic acids	酚酸类	Phenolic acids	酚酸类	203733-40-8	97194	30108	77846	9	9	9	1.22209	0.0755101	0.177574	0.000131612	-12.8914	down
Hmyn007087	UPLC-MS/MS	C25H49O11P	LysoPI 16:0	溶血磷脂酰肌醇 16:0	Lipids	脂质	Glycerol ester	甘油酯	-	346.74	214.59	525.72	10932	7202.6	34373	1.1758	0.18138	0.264966	48.3028	5.59404	up
Rfmb25702	UPLC-MS/MS	C28H34O12	Pinoresinol-4-O-(6''-acetyl)glucoside	松脂醇-4-O-(6''-乙酰)葡萄糖苷	Lignans and Coumarins	木脂素和香豆素	Lignans	木脂素	-	36463	30265	29336	169560	215910	208920	1.21742	0.00643803	0.108002	6.18744	2.62934	up
Zmjp003463	UPLC-MS/MS	C26H28O14	Vitexin-2''-O-xyloside	牡荆素-2''-O-木糖苷	Flavonoids	黄酮	Flavonoid carbonoside	黄酮碳糖苷	-	3592.3	20971	33546	31676000	29420000	24997000	1.20822	0.00464533	0.0906345	1481.57	10.5329	up
Hmcp001858	UPLC-MS/MS	C26H28O14	Kaempferol-3-O-arabinoside-7-O-rhamnoside	山奈酚-3-O-阿拉伯糖苷-7-O-鼠李糖苷	Flavonoids	黄酮	Flavonols	黄酮醇	-	9	9	4635.5	1301500	1209200	1010300	1.12765	0.00531855	0.0994011	756.635	9.56345	up
Lmnp202580	UPLC-MS/MS	C26H28O14	Apigenin-8-C-(2''-xylosyl)glucoside	芹菜素-8-C-(2''-木糖基)葡萄糖苷	Flavonoids	黄酮	Flavonoid carbonoside	黄酮碳糖苷	-	24154	51226	120240	20709000	26595000	15566000	1.211	0.0224713	0.130844	321.388	8.32817	up
pmp000411	UPLC-MS/MS	C26H28O14	Genistein-8-C-apiosyl(1→6)glucoside	染料木素-8-C-芹糖基(1→6)葡萄糖苷	Flavonoids	黄酮	Isoflavones	异黄酮	-	4635.2	2834.7	1528.2	3684300	2929200	2924400	1.21941	0.00625984	0.108002	1059.99	10.0498	up
Lmnp102580	UPLC-MS/MS	C26H28O14	Apigenin-6-C-(2''-xylosyl)glucoside	芹菜素-6-C-(2''-木糖基)葡萄糖苷	Flavonoids	黄酮	Flavonoid carbonoside	黄酮碳糖苷	-	147100	317710	876040	63512000	70261000	54730000	1.20332	0.00506883	0.0978338	140.585	7.1353	up
pmb2922	UPLC-MS/MS	C15H24N2O17P2	Uridine 5'-diphospho-D-glucose	尿苷 5'-二磷酸-D-葡萄糖	Nucleotides and derivatives	核苷酸及其衍生物	Nucleotides and derivatives	核苷酸及其衍生物	133-89-1	1595500	1353500	1015300	671530	555260	480820	1.14266	0.0359917	0.135157	0.430747	-1.21509	down
Lmqp007331	UPLC-MS/MS	C30H26O12	Kaempferol-3-O-(3''-O-p-Coumaroyl)rhamnoside	山奈酚-3-O-(3''-O-对香豆酰)鼠李糖苷	Flavonoids	黄酮	Flavonols	黄酮醇	-	30470	29776	163980	31870000	69555000	16620000	1.19925	0.129912	0.221223	526.455	9.04017	up
Lmqp007185	UPLC-MS/MS	C30H26O12	Kaempferol-3-O-(4''-O-p-Coumaroyl)rhamnoside	山奈酚-3-O-(4''-O-对香豆酰)鼠李糖苷	Flavonoids	黄酮	Flavonols	黄酮醇	-	32733	34799	125050	29637000	66127000	15179000	1.20542	0.135234	0.225716	576.082	9.17013	up
Lmmp006709	UPLC-MS/MS	C30H26O12	Kaempferol-3-O-(4''-p-coumaroyl)rhamnoside	山奈酚-3-O-(4''-对香豆酰基)鼠李糖苷	Flavonoids	黄酮	Flavonols	黄酮醇	-	9	9	9	2158700	6405300	1239400	1.22254	0.176366	0.260342	363089	18.47	up
MWSHY0201	UPLC-MS/MS	C27H30O14	Kaempferol-3,7-O-dirhamnoside (Kaempferitrin)	山奈酚-3,7-O-二鼠李糖苷 (山奈苷)	Flavonoids	黄酮	Flavonols	黄酮醇	482-38-2	8060.8	5382.8	80592	1318900	481580	2159000	1.11983	0.116595	0.211906	42.1062	5.39596	up
pme0368	UPLC-MS/MS	C27H30O14	Apigenin-7-O-rutinoside (Isorhoifolin)	芹菜素-7-O-芸香糖苷 (异野漆树苷)	Flavonoids	黄酮	Flavones	黄酮	552-57-8	9	9	9	177500	110510	54465	1.22244	0.08489	0.184449	12684.3	13.6308	up
HJAP148	UPLC-MS/MS	C26H28O15	Kaempferol-3-O-sambubioside	山奈酚-3-O-桑布双糖苷	Flavonoids	黄酮	Flavonols	黄酮醇	27661-51-4	28654	41491	310840	4938300	2005200	6430600	1.13515	0.0787636	0.181367	35.104	5.13356	up
Hmcp001769	UPLC-MS/MS	C26H28O15	Quercetin-3-O-rhamnosyl(1→2)arabinoside	槲皮素-3-O-鼠李糖基(1→2)阿拉伯糖苷	Flavonoids	黄酮	Flavonols	黄酮醇	-	55126	96836	270420	51854000	57233000	36577000	1.21146	0.0159325	0.121383	344.863	8.42988	up
mws0046	UPLC-MS/MS	C27H32O14	Naringenin-7-O-Neohesperidoside(Naringin)	柚皮素-7-O-新橙皮糖苷(柚皮苷)	Flavonoids	黄酮	Flavanones	二氢黄酮	10236-47-2	9	9	9	161410	18549	20959	1.20834	0.291947	0.370761	7441.41	12.8614	up
pmb2586	UPLC-MS/MS	C30H26O13	Gallocatechin-(4α→8)-catechin	没食子儿茶素-(4α→8)-儿茶素	Flavonoids	黄酮	Flavanols	黄烷醇类	-	9	9	9	34630	75301	71137	1.22365	0.0429022	0.149327	6706.22	12.7113	up
Zmcp003989	UPLC-MS/MS	C27H30O15	Kaempferol-3-O-rhamnosyl(1→2)glucoside	山奈酚-3-O-鼠李糖基(1→2)葡萄糖苷	Flavonoids	黄酮	Flavonols	黄酮醇	-	29293	72893	528900	13991000	33386000	21341000	1.16503	0.0567016	0.160789	108.888	6.76671	up
pmp000593	UPLC-MS/MS	C27H30O15	Luteolin-7-O-rutinoside	木犀草素-7-O-芸香糖苷	Flavonoids	黄酮	Flavones	黄酮	3563-98-2	22408	13282	168080	30629000	38683000	19278000	1.19238	0.0346058	0.133947	434.755	8.76406	up
Lmsn002815	UPLC-MS/MS	C27H30O15	Kaempferol-3-O-rutinoside(Nicotiflorin)	山奈酚-3-O-芸香糖苷(烟花苷)	Flavonoids	黄酮	Flavonols	黄酮醇	17650-84-9	4097.2	5406.3	48430	13832000	16777000	7089800	1.19499	0.0484519	0.153409	650.725	9.34591	up
MWSslk254	UPLC-MS/MS	C27H30O15	Kaempferol-3-O-glucorhamnoside	山奈酚-3-O-葡萄糖鼠李糖苷	Flavonoids	黄酮	Flavonols	黄酮醇	40437-72-7	9	1723	12879	3392700	4242700	1463100	1.0933	0.0664803	0.170231	622.716	9.28243	up
pmp001106	UPLC-MS/MS	C27H30O15	Vitexin-2''-O-glucoside	牡荆素-2''-O-葡萄糖苷	Flavonoids	黄酮	Flavonoid carbonoside	黄酮碳糖苷	61360-94-9	32673	30577	22098	3174900	3702400	980680	1.20286	0.0897463	0.187537	92.0699	6.52466	up
Lmsp004247	UPLC-MS/MS	C27H30O15	Isorhamnetin-3-O-arabinoside-7-O-rhamnoside	异鼠李素-3-O-阿拉伯糖苷-7-O-鼠李糖苷	Flavonoids	黄酮	Flavonols	黄酮醇	-	4552	13875	46940	8375600	12775000	18093000	1.20091	0.0432911	0.149726	600.358	9.22968	up
Lmnp202682	UPLC-MS/MS	C27H30O15	5,7,4'-Trihydroxy-8-methoxyflavone-6-C-[Xylosyl-(1-2)]-glucoside	5,7,4'-三羟基-8-甲氧基黄酮-6-C-[木糖-(1-2)]-葡萄糖苷	Flavonoids	黄酮	Flavonoid carbonoside	黄酮碳糖苷	-	8667.8	9	28078	8820400	39035000	18718000	1.08004	0.130131	0.221223	1811.28	10.8228	up
MWSHY0061	UPLC-MS/MS	C27H30O15	Kaempferol-3-O-neohesperidoside	山奈酚-3-O-新橙皮糖苷	Flavonoids	黄酮	Flavonols	黄酮醇	32602-81-6	43852	79960	563990	54979000	57937000	47456000	1.18901	0.00334209	0.0828103	233.166	7.86521	up
Lmnp102682	UPLC-MS/MS	C27H30O15	Hispidulin-8-C-(2''-O-xylosyl)glucoside	高车前素-8-C-(2''-O-木糖基)葡萄糖苷	Flavonoids	黄酮	Flavonoid carbonoside	黄酮碳糖苷	-	9	5889.3	35207	6885700	36490000	19562000	1.08486	0.134385	0.225019	1531.13	10.5804	up
mws1073	UPLC-MS/MS	C27H30O15	Apigenin-6,8-di-C-glucoside (Vicenin-2)	芹菜素-6,8-二-C-葡萄糖苷 (新西兰牡荆苷 II)	Flavonoids	黄酮	Flavonoid carbonoside	黄酮碳糖苷	23666-13-9	232190	184230	185570	15805000	25570000	7497400	1.20899	0.091179	0.189498	81.1847	6.34314	up
MWSHY0080	UPLC-MS/MS	C27H30O15	Luteolin-7-O-neohesperidoside (Lonicerin)	木犀草素-7-O-新橘皮糖苷 (忍冬苷)	Flavonoids	黄酮	Flavones	黄酮	25694-72-8	115140	106480	695750	51131000	55318000	46131000	1.19706	0.00262939	0.0764643	166.323	7.37785	up
Lmsp004670	UPLC-MS/MS	C27H30O15	Kaempferol-3-O-glucoside-7-O-rhamnoside	山奈酚-3-O-葡萄糖苷-7-O-鼠李糖苷	Flavonoids	黄酮	Flavonols	黄酮醇	-	95765	94072	768630	53438000	62355000	48172000	1.19064	0.00564061	0.100246	171.07	7.41844	up
Hmmp003156	UPLC-MS/MS	C27H30O15	Saponarin(Isovitexin-7-O-glucoside)	皂草苷(异牡荆素-7-O-葡萄糖苷)	Flavonoids	黄酮	Flavones	黄酮	20310-89-8	9	9	9	111510	200420	55726	1.22234	0.100676	0.197257	13616.9	13.7331	up
Lmjp002596	UPLC-MS/MS	C26H28O16	Quercetin-3-O-sambubioside	槲皮素-3-O-桑布双糖苷	Flavonoids	黄酮	Flavonols	黄酮醇	83048-35-5	7572.5	7027	34558	1004700	657310	924570	1.18868	0.0145352	0.120791	52.6182	5.71749	up
Lmmp000897	UPLC-MS/MS	C30H26O14	Gallocatechin-(4α→8)-gallocatechin	没食子儿茶素-(4α→8)-没食子儿茶素	Flavonoids	黄酮	Flavanols	黄烷醇类	-	9	13353	19924	2765700	5887800	1144800	1.02419	0.144294	0.232294	294.367	8.20147	up
Lmsp004166	UPLC-MS/MS	C27H30O16	Quercetin-3-O-glucoside-7-O-rhamnoside	槲皮素-3-O-葡萄糖苷-7-O-鼠李糖苷	Flavonoids	黄酮	Flavonols	黄酮醇	-	6391	1830.8	18303	2363200	3614700	1448800	1.19186	0.0590758	0.162558	279.991	8.12924	up
Zmjp003031	UPLC-MS/MS	C27H30O16	Orientin-2''-O-galactoside	荭草素-2''-O-半乳糖苷	Flavonoids	黄酮	Flavonoid carbonoside	黄酮碳糖苷	-	23188	10754	25136	5534000	7112700	2927000	1.21452	0.0514284	0.156015	263.613	8.04228	up
Lmjp002461	UPLC-MS/MS	C27H30O16	Quercetin-3-O-neohesperidoside	槲皮素 3-O-新橘皮糖苷	Flavonoids	黄酮	Flavonols	黄酮醇	117611-67-3	9	9	9	196710	318380	130910	1.22431	0.0593107	0.162558	23925.9	14.5463	up
Zmhp003716	UPLC-MS/MS	C27H30O16	Rhodionidin	Rhodionidin	Flavonoids	黄酮	Flavonols	黄酮醇	-	71165	15025	69080	26718000	36423000	15658000	1.20597	0.0485766	0.153512	507.497	8.98725	up
Zmhn002032	UPLC-MS/MS	C28H34O15	4-O-(6'-O-Glucosylcaffeoylglucosyl)-4-hydroxybenzyl alcohol	4-O-(6'-O-葡萄糖基咖啡酰葡萄糖基)-4-羟基苄醇	Phenolic acids	酚酸类	Phenolic acids	酚酸类	-	9	9	7951	1100200	2240500	867550	1.10952	0.0808266	0.182495	528.078	9.04461	up
Cmdn003997	UPLC-MS/MS	C25H38O17	6'-O-α-D-galactopyranosylbarlerin	6'-O-α-D-半乳糖基(8-O-乙酰山栀苷甲酯)	Terpenoids	萜类	Monoterpenoids	倍萜	927691-89-2	9	9	9	1258200	2393000	873250	1.22442	0.0805841	0.182177	167572	17.3544	up
mws4134	UPLC-MS/MS	C20H32N6O12S2	Oxiglutatione	氧化谷胱甘肽	Amino acids and derivatives	氨基酸及其衍生物	Amino acids and derivatives	氨基酸及其衍生物	27025-41-8	519120	722070	853600	165720	181630	154920	1.19508	0.0312998	0.132208	0.239771	-2.06027	down
Lhcp102425	UPLC-MS/MS	C36H58O8	Prosaikogenin G	前柴胡皂苷元G	Terpenoids	萜类	Triterpene Saponin	三萜皂苷	-	2245900	1722000	2262600	4820.3	9	9	1.13509	0.00723144	0.109917	0.000776551	-10.3306	down
Lhcp102427	UPLC-MS/MS	C36H58O8	3-O-β-D-Fucopyranosyl saikogenin F(iso-02)	前柴胡皂苷元F(iso-02)	Terpenoids	萜类	Triterpene Saponin	三萜皂苷	-	633140	992600	610600	9	3873.8	9	1.11964	0.0265463	0.130844	0.00174025	-9.16649	down
HJN051	UPLC-MS/MS	C28H32O16	Tamarixetin-3-O-rutinoside	柽柳黄素-3-O-芸香糖苷	Flavonoids	黄酮	Flavonols	黄酮醇	-	22175	45006	708500	6534100	10626000	12520000	1.11589	0.0303027	0.132208	38.2633	5.25789	up
Hmlp004943	UPLC-MS/MS	C28H32O16	Nitensoside B	Nitensoside B	Lignans and Coumarins	木脂素和香豆素	Coumarins	香豆素	-	3422.2	6844.2	138690	1933000	3678700	3047700	1.12434	0.0300694	0.132208	58.1338	5.86131	up
Lmsp003939	UPLC-MS/MS	C28H32O16	Isorhamnetin-3-O-galactoide-7-O-rhamnoside	异鼠李素-3-O-半乳糖苷-7-O-鼠李糖苷	Flavonoids	黄酮	Flavonols	黄酮醇	-	136410	378590	532770	7779000	35973000	20693000	1.17769	0.122021	0.217074	61.5068	5.94267	up
Lmnp002584	UPLC-MS/MS	C28H32O16	Hispidulin-8-C-(2''-O-glucosyl)glucoside	高车前素-8-C-(2''-O-葡萄糖基)葡萄糖苷	Flavonoids	黄酮	Flavonoid carbonoside	黄酮碳糖苷	-	44625	130030	153070	2029300	9894700	5492300	1.17413	0.129347	0.221223	53.143	5.73181	up
Lmsp004045	UPLC-MS/MS	C28H32O16	Isorhamnetin-3-O-glucoside-7-O-rhamnoside	异鼠李素-3-O-葡萄糖苷-7-O-鼠李糖苷	Flavonoids	黄酮	Flavonols	黄酮醇	-	137050	340430	563980	7310700	36499000	20439000	1.17439	0.129893	0.221223	61.691	5.94699	up
pmb0603	UPLC-MS/MS	C28H32O16	Chrysoeriol-7,4'-di-O-glucoside	金圣草黄素-7,4'-二-O-葡萄糖苷	Flavonoids	黄酮	Flavones	黄酮	-	9	9	15394	195750	346060	265810	1.03568	0.0246625	0.130844	52.402	5.71155	up
Lmmp002963	UPLC-MS/MS	C28H32O16	6-C-Methylquercetin-3-O-rutinoside	6-C-甲基槲皮素-3-O-芸香糖苷	Flavonoids	黄酮	Flavonols	黄酮醇	-	2820	1882.2	3637.2	54534	239110	128970	1.19041	0.123426	0.217846	50.6768	5.66325	up
Lmmp002463	UPLC-MS/MS	C28H32O16	Sexangularetin-3-O-glucoside-7-O-rhamnoside	3,5,7,4'-四羟基-8-甲氧基黄酮-3-O-葡萄糖苷-7-O-鼠李糖苷	Flavonoids	黄酮	Flavonols	黄酮醇	-	2573.2	9384.2	111050	2082400	3287500	2814900	1.13178	0.0158448	0.121383	66.5391	6.05613	up
Lmsp004721	UPLC-MS/MS	C28H32O16	Tamarixetin-3-O-glucoside-7-O-rhamnoside	柽柳黄素-3-O-葡萄糖苷-7-O-鼠李糖苷	Flavonoids	黄酮	Flavonols	黄酮醇	-	4287	13583	123270	1952200	3510400	3372500	1.13999	0.0276857	0.130844	62.5981	5.96805	up
pme1540	UPLC-MS/MS	C28H32O16	Isorhamnetin-3-O-neohesperidoside	异鼠李素-3-O-新橙皮糖苷	Flavonoids	黄酮	Flavonols	黄酮醇	55033-90-4	32803	76870	91242	1863000	7413500	3213600	1.1911	0.133808	0.224448	62.1661	5.95806	up
MWSHY0135	UPLC-MS/MS	C28H32O16	Isorhamnetin-3-O-rutinoside (Narcissin)	异鼠李素-3-O-芸香糖苷 (水仙苷)	Flavonoids	黄酮	Flavones	黄酮	604-80-8	4274.8	5089	114610	1917600	3757400	3156000	1.13706	0.0326008	0.132257	71.2328	6.15447	up
Lmhp003217	UPLC-MS/MS	C28H32O16	2'-Hydoxy,5-methoxyGenistein-O-rhamnosyl-glucoside	2'-羟基-5-甲氧基染料木素-O-鼠李糖-葡萄糖	Flavonoids	黄酮	Isoflavones	异黄酮	-	5146.5	1633	141140	1835800	3579200	3219900	1.10307	0.0327084	0.132257	58.3757	5.8673	up
Zmhn002574	UPLC-MS/MS	C28H32O16	Rhamnazin 3-Glucosyl-Arabinofuranoside	鼠李秦素-3-O-葡萄糖-阿拉伯糖	Flavonoids	黄酮	Flavones	黄酮	-	9	9	9	64511	21085	68196	1.21989	0.0771565	0.179399	5696	12.4757	up
HJAP026	UPLC-MS/MS	C28H32O16	Chrysoeriol-6-C-glucoside-4'-O-glucoside	金圣草黄素-6-C-葡萄糖苷-4'-O-葡萄糖苷	Flavonoids	黄酮	Flavonoid carbonoside	黄酮碳糖苷	-	42404	82717	150750	2173500	9632900	4081800	1.18195	0.145504	0.233197	57.5929	5.84782	up
Lmcn005735	UPLC-MS/MS	C29H36O15	Methylhesperidin	甲基橙皮苷	Flavonoids	黄酮	Flavones	黄酮	11013-97-1	9	9	9	78870	34135	79728	1.22251	0.0507932	0.156015	7138.26	12.8014	up
pmp001311	UPLC-MS/MS	C27H30O17	6-Hydroxykaempferol-7,6'-O-Diglucoside	6-羟基山奈酚-7,6'-O-二葡萄糖苷	Flavonoids	黄酮	Flavonols	黄酮醇	-	20002	41027	20311	1323800	1992200	448720	1.18542	0.110844	0.207444	46.2837	5.53243	up
Zmcp002666	UPLC-MS/MS	C27H30O17	Quercetin-3,7-Di-O-glucoside	槲皮素-3,7-二-O-葡萄糖苷	Flavonoids	黄酮	Flavonols	黄酮醇	-	8195.8	13938	12765	872760	1474200	296940	1.19407	0.124775	0.218352	75.7591	6.24335	up
pmp001310	UPLC-MS/MS	C27H30O17	6-Hydroxykaempferol-3,6-O-Diglucoside	6-羟基山奈酚-3,6-O-二葡萄糖苷	Flavonoids	黄酮	Flavonols	黄酮醇	-	42772	7812.2	11693	6064000	14930000	4322300	1.19955	0.124435	0.218352	406.51	8.66715	up
pmb0645	UPLC-MS/MS	C28H34O16	Hesperetin-6-C-glucoside-7-O-glucoside	橙皮素-6-C-葡萄糖苷-7-O-葡萄糖苷	Flavonoids	黄酮	Flavonoid carbonoside	黄酮碳糖苷	-	9	9	9	106920	354910	49345	1.21767	0.21077	0.295111	18932.4	14.2086	up
pmb0618	UPLC-MS/MS	C28H34O16	Hesperetin-8-C-glucoside-3'-O-glucoside	橙皮素-8-C-葡萄糖苷-3'-O-葡萄糖苷	Flavonoids	黄酮	Flavonoid carbonoside	黄酮碳糖苷	-	9	5835.9	9	226580	319000	114100	1.0754	0.0664445	0.170231	112.691	6.81622	up
Hmcp001578	UPLC-MS/MS	C28H32O17	Isorhamnetin-3,7-O-diglucoside	异鼠李素-3,7-O-二葡萄糖苷	Flavonoids	黄酮	Flavonols	黄酮醇	6758-51-6	5431.8	41124	80776	273340	1848100	624540	1.05547	0.208707	0.293137	21.5655	4.43066	up
Lmhp002800	UPLC-MS/MS	C28H32O17	2'-Hydoxy,5-methoxyGenistein-4',7-O-diglucoside	2'-羟基-5-甲氧基染料木素-4',7-O-二葡萄糖	Flavonoids	黄酮	Isoflavones	异黄酮	-	3685	7438.5	5457.5	141150	751760	382040	1.19027	0.142005	0.230054	76.8922	6.26477	up
Lmsp003252	UPLC-MS/MS	C28H32O17	Isorhamnetin-3-O-sophoroside	异鼠李素-3-O-槐糖苷	Flavonoids	黄酮	Flavonols	黄酮醇	-	8163.8	85395	132750	858160	5236400	1771000	1.08639	0.196317	0.280419	34.7559	5.11918	up
mws1153	UPLC-MS/MS	C31H38O16	2'-Acetylacteoside	2'-乙酰毛蕊花糖苷	Phenolic acids	酚酸类	Phenolic acids	酚酸类	94492-24-7	5205	25978	13146	203320	228780	116650	1.14933	0.0349373	0.134288	12.379	3.62983	up
pmp001276	UPLC-MS/MS	C33H56O14	1-Linolenoyl-rac-glycerol-diglucoside	1-亚麻酰单甘油酯-二葡萄糖苷	Lipids	脂质	Free fatty acids	游离脂肪酸	-	170900	161370	226380	746510	911290	582530	1.19332	0.0233909	0.130844	4.01026	2.00369	up
Lmhp008513	UPLC-MS/MS	C33H56O14	2-α-Linolenoyl-glycerol-1,3-di-O-glucoside	2-α-亚麻酸甘油酯-1,3-二-O-葡萄糖苷	Lipids	脂质	Glycerol ester	甘油酯	-	1675.6	2049.4	12802	16957	55533	23258	1.00251	0.148639	0.235487	5.79343	2.53442	up
Lmyn005812	UPLC-MS/MS	C33H56O14	Gingerglycolipid A	姜糖脂 A	Lipids	脂质	Glycerol ester	甘油酯	145937-22-0	45235	44096	83087	445340	492340	311410	1.19103	0.0177327	0.12631	7.24455	2.8569	up
Lmhp008744	UPLC-MS/MS	C33H56O14	1-α-Linolenoyl-glycerol-2,3-di-O-glucoside	1-α-亚麻酸甘油酯-2,3-二-O-葡萄糖苷	Lipids	脂质	Glycerol ester	甘油酯	-	5037.9	9190.6	26120	41993	36646	78439	1.00745	0.0788122	0.181367	3.89303	1.96089	up
HJN102	UPLC-MS/MS	C34H30O15	3,4,5-Tricaffeoylquinic acid	3,4,5-三咖啡酰奎宁酸	Phenolic acids	酚酸类	Phenolic acids	酚酸类	86632-03-3	267420	768340	457630	9074700	4972100	1885600	1.10644	0.146329	0.233891	10.6686	3.4153	up
Lmhp009190	UPLC-MS/MS	C33H58O14	2-Linoleoylglycerol-1,3-di-O-glucoside	2-亚油酰甘油酯-1,3-二-O-葡萄糖苷	Lipids	脂质	Glycerol ester	甘油酯	-	95442	134860	89416	44176	55263	27856	1.08938	0.0270318	0.130844	0.398148	-1.32862	down
pmn001370	UPLC-MS/MS	C32H42O16	Pinoresinol-4,4'-O-di-O-glucoside	松脂醇-4,4'-O-二-O-葡萄糖苷	Lignans and Coumarins	木脂素和香豆素	Lignans	木脂素	63902-38-5	348200	222420	371220	2326300	1504000	896240	1.13443	0.0912859	0.189498	5.01841	2.32723	up
Hmln001931	UPLC-MS/MS	C32H42O16	Matairesinol-4,4'-di-O-glucoside	罗汉松脂酚-4,4'-di-O-葡萄糖苷	Lignans and Coumarins	木脂素和香豆素	Lignans	木脂素	-	5556.2	24891	21407	166950	5619500	384450	1.05834	0.37096	0.445102	119.005	6.89488	up
Hmsn003050	UPLC-MS/MS	C37H58O12	Esculentoside D	商陆皂苷 D	Terpenoids	萜类	Triterpene Saponin	三萜皂苷	89808-50-4	401110	827920	93390	9	9	9	1.21647	0.174329	0.259635	2.04171e-05	-15.5799	down
Lmgn002253	UPLC-MS/MS	C31H36O18	Syringoylcaffeoylquinic acid-D-glucose	丁香酰咖啡酰奎宁酸葡萄糖	Phenolic acids	酚酸类	Phenolic acids	酚酸类	-	95140	151680	87441	474020	806380	401690	1.16376	0.0655178	0.168972	5.03227	2.33121	up
Hmzn004430	UPLC-MS/MS	C32H40O17	Sesamolinol 4'-O-B-D-Glucosyl (1->6)-O-B-D-Glucoside	芝麻林素酚 4'-O-β-D-葡萄糖基 (1->6)-O-β-D-葡萄糖苷	Lignans and Coumarins	木脂素和香豆素	Lignans	木脂素	-	246640	2562000	390000	45413	40146	107440	1.02222	0.312822	0.389131	0.0603378	-4.05079	down
Xmyp004678	UPLC-MS/MS	C32H38O19	Kaempferol-3-O-(2-O-Xylosyl-6-O-Rhamnosyl)Glucoside	山奈酚-3-O-(2''-O-木糖基-6''-O-鼠李糖基)葡萄糖苷	Flavonoids	黄酮	Flavonols	黄酮醇	-	2840.5	12167	11766	9330900	8508500	4673400	1.21319	0.0347633	0.133947	840.861	9.71572	up
Zmlp003063	UPLC-MS/MS	C33H40O19	Luteolin-7-O-(2''-O-rhamnosyl)rutinoside	木犀草素-7-O-(2''-O-鼠李糖基)芸香糖苷	Flavonoids	黄酮	Flavones	黄酮	-	12550	18824	59672	16881000	34497000	9616600	1.20782	0.110813	0.207444	669.932	9.38787	up
Lmsp003881	UPLC-MS/MS	C33H40O19	Kaempferol-3-O-rutinoside-7-O-rhamnoside	山奈酚-3-O-芸香糖苷-7-O-鼠李糖苷	Flavonoids	黄酮	Flavonols	黄酮醇	-	6225	8303	17409	8206000	19294000	4039100	1.21163	0.147433	0.234292	987.541	9.9477	up
Hmdp103165	UPLC-MS/MS	C33H40O19	Clitorin	蝶豆素	Flavonoids	黄酮	Flavones	黄酮	55804-74-5	1355.4	672.28	14590	8397500	9445700	5350300	1.19374	0.0243564	0.130844	1395.71	10.4468	up
mws1035	UPLC-MS/MS	C33H40O19	Kaempferol-3-O-robinoside-7-O-rhamnoside (Robinin)	山奈酚-3-O-刺槐糖苷-7-O-鼠李糖苷 (刺槐苷)	Flavonoids	黄酮	Flavonols	黄酮醇	301-19-9	19751	19037	34526	15165000	30352000	8962400	1.21738	0.103952	0.199782	743.097	9.53741	up
Hmqp002870	UPLC-MS/MS	C32H38O20	Luteolin-7-O-Sophoroside-5-O-arabinoside	木犀草素-7-O-槐糖苷-5-O-阿拉伯糖苷	Flavonoids	黄酮	Flavones	黄酮	-	9	9	9	93104	11538	125180	1.20607	0.151823	0.237582	8511.93	13.0553	up
pme2651	UPLC-MS/MS	C21H28N7O17P3	NADP (Nicotinamide adenine dinucleotide phosphate)	烟酰胺腺嘌呤二核苷酸磷酸	Nucleotides and derivatives	核苷酸及其衍生物	Nucleotides and derivatives	核苷酸及其衍生物	53-59-8	46911	55251	46764	5719.8	5165	9329.3	1.20529	0.00109751	0.0679322	0.135733	-2.88116	down
Hmgp003409	UPLC-MS/MS	C33H40O20	Quercetin-3-O-Soph-7-O-Rha b	Quercetin-3-O-Soph-7-O-Rha b	Flavonoids	黄酮	Flavones	黄酮	-	16407	9	9	2852600	3709800	440810	1.07515	0.140327	0.229651	426.375	8.73598	up
pmp001105	UPLC-MS/MS	C33H40O20	Kaempferol-3-O-neohesperidoside-7-O-glucoside	山奈酚-3-O-新橙皮糖苷-7-O-葡萄糖苷	Flavonoids	黄酮	Flavonols	黄酮醇	-	9	9	17056	134440	262400	122200	1.00983	0.0627088	0.165797	30.3994	4.92597	up
Zmgp002857	UPLC-MS/MS	C33H40O20	Quercetin-3-O-α-rhamnosyl (1→2)-[α-rhamnosyl (1→6)]-β-glucoside	槲皮素-3-O-α-鼠李糖基(1→2)-[α-鼠李糖基(1→6)]-β-葡萄糖苷	Flavonoids	黄酮	Flavonols	黄酮醇	-	11490	2436.8	3990.5	2450200	3597200	421380	1.18056	0.146543	0.234008	361.035	8.496	up
Zmmp003591	UPLC-MS/MS	C33H41O20+	Delphinidin-3-O-(2'''-O-p-coumaroyl)rutinoside	飞燕草素-3-O-(2'''-O-对香豆酰)芸香糖苷	Flavonoids	黄酮	Anthocyanidins	花青素	-	9	9	20050	244750	75808	497100	1.00447	0.161607	0.248092	40.7444	5.34853	up
pmn001505	UPLC-MS/MS	C41H64O13	Oleanolic acid-3-O-xylosyl(1→3)glucuronide	齐墩果酸-3-O-木糖基(1→3)葡萄糖醛酸苷	Terpenoids	萜类	Triterpene Saponin	三萜皂苷	-	1589900	351600	768580	9781200	5811100	14175000	1.13185	0.0618108	0.164859	10.9839	3.45732	up
Zmcn007922	UPLC-MS/MS	C41H64O13	Tarasaponin VI	龙牙楤木皂苷VI	Terpenoids	萜类	Triterpene Saponin	三萜皂苷	59252-95-8	9	9	9	4482.4	2904.5	2123.3	1.22224	0.0449542	0.15111	352.23	8.46037	up
Zmcp102707	UPLC-MS/MS	C42H68O12	Saikosaponin E	柴胡皂苷E	Terpenoids	萜类	Triterpene Saponin	三萜皂苷	-	185770	195670	539570	9	9	9	1.22243	0.118565	0.212832	2.93156e-05	-15.058	down
HJAP119	UPLC-MS/MS	C34H42O20	Rhamnetin-3-O-Rutinoside-5-O-rhamnoside	鼠李素-3-O-芸香糖苷-5-O-鼠李糖苷	Flavonoids	黄酮	Flavonols	黄酮醇	-	14612	75929	70864	1304500	7660500	1821300	1.15325	0.22437	0.307908	66.8275	6.06237	up
pmb0592	UPLC-MS/MS	C34H42O20	Chrysoeriol-7-O-rutinoside-5-O-glucoside	金圣草黄素-7-O-芸香糖苷-5-O-葡萄糖苷	Flavonoids	黄酮	Flavones	黄酮	-	46191	128680	102900	2848500	9059200	3247000	1.19369	0.132097	0.222731	54.5583	5.76973	up
MWSHY0122	UPLC-MS/MS	C34H42O20	Typhaneoside	香蒲新苷	Flavonoids	黄酮	Flavones	黄酮	104472-68-6	24524	90357	114110	1727600	8794800	2368800	1.16105	0.202311	0.286395	56.2957	5.81495	up
Lmsp002982	UPLC-MS/MS	C33H40O21	Quercetin-3-O-sophoroside-7-O-rhamnoside	槲皮素-3-O-槐糖苷-7-O-鼠李糖苷	Flavonoids	黄酮	Flavonols	黄酮醇	-	9	9	5017.5	138530	193770	66107	1.06451	0.0708066	0.173158	79.1197	6.30596	up
Lmmp002334	UPLC-MS/MS	C33H40O21	Quercetin-3-O-rutinoside-7-O-glucoside	槲皮素-3-O-芸香糖苷-7-O-葡萄糖苷	Flavonoids	黄酮	Flavonols	黄酮醇	-	9009	3777.2	3841.2	53015	69285	118180	1.1789	0.0614082	0.164118	14.4629	3.85428	up
Zmqp002952	UPLC-MS/MS	C33H41O21+	Delphinidin-3-O-rutinoside-7-O-glucoside	飞燕草素-3-O-芸香糖苷-7-O-葡萄糖苷	Flavonoids	黄酮	Anthocyanidins	花青素	-	9	9	9	14968	7226.1	5770.5	1.22121	0.0824877	0.18287	1035.73	10.0164	up
pmn001331	UPLC-MS/MS	C42H66O13	16-Keto-saikosaponin A	16-羰基-柴胡皂苷 A	Terpenoids	萜类	Triterpene Saponin	三萜皂苷	-	62009	70753	52430	9	9	9	1.22526	0.00726912	0.109917	0.000145795	-12.7438	down
HJN098	UPLC-MS/MS	C42H68O13	Azukisaponin I	赤豆皂苷 I	Terpenoids	萜类	Triterpene Saponin	三萜皂苷	82793-02-0	9	9	9	4490000	15474000	18045000	1.22316	0.0928823	0.191416	1.40774e+06	20.425	up
Lhcp102421	UPLC-MS/MS	C42H68O13	Saikosapanin B1	柴胡皂苷B1	Terpenoids	萜类	Triterpene Saponin	三萜皂苷	-	1558200	1890500	1615400	9	9	9	1.22537	0.00367194	0.0878818	5.33165e-06	-17.517	down
mws2191	UPLC-MS/MS	C42H68O13	Saikosaponin G	柴胡皂苷 G	Terpenoids	萜类	Triterpene Saponin	三萜皂苷	99365-19-2	1239800	1559000	1654100	4302.1	9	9	1.13299	0.00705806	0.109917	0.000970177	-10.0095	down
mws2190	UPLC-MS/MS	C42H68O13	Saikosaponin D	柴胡皂苷 D	Terpenoids	萜类	Triterpene	三萜	20874-52-6	567460	574750	749350	1425.2	9	1185.4	1.13126	0.00879514	0.117054	0.00138489	-9.49601	down
mws2188	UPLC-MS/MS	C42H68O13	Saikosaponin A	柴胡皂苷 A	Terpenoids	萜类	Triterpene	三萜	20736-09-8	3321900	3928300	3902700	4516.1	5176.5	9	1.10219	0.00282807	0.0782005	0.000869872	-10.1669	down
Hmmp006067	UPLC-MS/MS	C42H68O13	Oleanolic acid-3-O-glucosyl(1→2)glucoside	齐墩果酸-3-O-葡萄糖基(1→2)葡萄糖苷	Terpenoids	萜类	Triterpene Saponin	三萜皂苷	-	2152	3197.7	9	664350	270100	1684100	1.08067	0.174605	0.259635	488.654	8.93267	up
Lmsp003790	UPLC-MS/MS	C34H42O21	Isorhamnetin-3-O-sophoroside-7-O-rhamnoside	异鼠李素-3-O-槐糖苷-7-O-鼠李糖苷	Flavonoids	黄酮	Flavonols	黄酮醇	41328-75-0	8884	12278	12344	136090	223520	244980	1.21319	0.0291428	0.132208	18.0442	4.17347	up
mws1150	UPLC-MS/MS	C35H46O20	Echinacoside	松果菊苷	Phenolic acids	酚酸类	Phenolic acids	酚酸类	82854-37-3	9	9	9	17991	35820	65884	1.2203	0.103953	0.199782	4433.15	12.1141	up
Cmdn004237	UPLC-MS/MS	C35H46O20	Betonyoside E	Betonyoside E	Phenolic acids	酚酸类	Phenolic acids	酚酸类	181301-30-4	9	9	9	21058	52955	114920	1.21744	0.149664	0.236264	6997.52	12.7726	up
Zmcp102709	UPLC-MS/MS	C42H68O14	Saikosaponin L	柴胡皂苷L	Terpenoids	萜类	Triterpene Saponin	三萜皂苷	-	862370	1518600	432610	9	9	9	1.223	0.0971244	0.195666	9.59632e-06	-16.6691	down
mws2187	UPLC-MS/MS	C43H72O14	Saikosaponin B4	柴胡皂苷 B4	Terpenoids	萜类	Triterpene Saponin	三萜皂苷	58558-09-1	174070	248840	128890	9	9	9	1.22453	0.0343124	0.133947	4.89308e-05	-14.3189	down
mws2194	UPLC-MS/MS	C43H72O14	Saikosaponin B3	柴胡皂苷 B3	Terpenoids	萜类	Triterpene	三萜	58316-42-0	157110	312870	128490	9	1078.6	9	1.1394	0.0737297	0.17521	0.00183234	-9.0921	down
Zmcp102720	UPLC-MS/MS	C47H76O17	Bupleurumwenchuanense	2''-O-β-D-吡喃木糖基-柴胡皂苷b2	Terpenoids	萜类	Triterpene Saponin	三萜皂苷	-	160490	227460	158820	36010	110220	38987	1.03294	0.0222552	0.130844	0.338748	-1.56172	down
Zmcp102719	UPLC-MS/MS	C47H76O17	saikosaponin K	柴胡皂苷K	Terpenoids	萜类	Triterpene Saponin	三萜皂苷	-	281160	427580	222780	61942	148830	48368	1.05931	0.0468916	0.152759	0.27819	-1.84586	down
Zmcp102716	UPLC-MS/MS	C47H76O17	Rotundifolioside A	圆叶柴胡果苷A	Terpenoids	萜类	Triterpene Saponin	三萜皂苷	-	342370	302210	280820	58208	147080	49500	1.09838	0.00692659	0.109917	0.275327	-1.86078	down
Hmmp005664	UPLC-MS/MS	C47H76O17	Akeboside Stf	木通皂苷 Stf	Terpenoids	萜类	Triterpene Saponin	三萜皂苷	-	9	9	9	1554.4	5304	12216	1.20331	0.179044	0.262946	706.459	9.46446	up
Zmcp102804	UPLC-MS/MS	C48H78O17	saikosaponin C	柴胡皂苷C	Terpenoids	萜类	Triterpene Saponin	三萜皂苷	-	1925900	801990	808900	9	9	9	1.22452	0.0874078	0.186039	7.63404e-06	-16.9991	down
Lhcp102415	UPLC-MS/MS	C48H78O17	Saikosaponin BK1	柴胡皂苜BK1	Terpenoids	萜类	Triterpene Saponin	三萜皂苷	110352-77-7	1078000	743520	992800	9	9	9	1.22543	0.0112511	0.120616	9.59379e-06	-16.6695	down
Zmcp102701	UPLC-MS/MS	C48H80O17	Rotundifolioside C	圆叶柴胡果苷C	Terpenoids	萜类	Triterpene Saponin	三萜皂苷	-	797420	651720	538900	8709.6	9	9	1.09041	0.0125224	0.120616	0.00439005	-7.83155	down
Lhcp102414	UPLC-MS/MS	C48H80O17	Saikosaponin F	柴胡皂苷F	Terpenoids	萜类	Triterpene Saponin	三萜皂苷	62687-63-2	926690	549670	571450	5956.9	9	9	1.1059	0.0307309	0.132208	0.0029177	-8.42095	down
Lmsp004090	UPLC-MS/MS	C43H48O23	Isorhamnetin-3-O-(6''-O-p-coumarol)sophoroside-7-O-rhamnoside	异鼠李素-3-O-(6''-O-对香豆酰)槐糖苷-7-O-鼠李糖苷	Flavonoids	黄酮	Flavonols	黄酮醇	-	838.5	3363.5	1729	19552	23905	15900	1.16329	0.0106554	0.120616	10.0079	3.32307	up
Cmhp005343	UPLC-MS/MS	C48H78O18	Cussonoside A	Cussonoside A	Terpenoids	萜类	Triterpene Saponin	三萜皂苷	57539-70-5	392550	619920	85619	9	9	9	1.21757	0.141804	0.230036	2.45882e-05	-15.3117	down
Lhcp102410	UPLC-MS/MS	C48H78O18	Saikosaponin N	柴胡皂苷N	Terpenoids	萜类	Triterpene Saponin	三萜皂苷	161068-50-4	474470	658480	1398700	9	9	62895	1.00352	0.0995793	0.196639	0.0248506	-5.33058	down
Lhcp102411	UPLC-MS/MS	C48H78O18	Saikosaponin S	柴胡皂苷S	Terpenoids	萜类	Triterpene Saponin	三萜皂苷	-	198390	490760	449240	9	9	9	1.22311	0.0533344	0.157719	2.37177e-05	-15.3637	down
XMW0757	GC-MS	C18H36O2	Hexadecanoic acid, 15-methyl-, methyl ester	十六酸十五甲酯	Ester	酯	-	-	6929-04-0	3239.09	1915.49	2128.9	6893.86	66334	11961	1.00782	0.305514	0.382444	11.6962	3.54796	up
XMW0958	GC-MS	C11H23I	1-Iodoundecane	1-碘十一烷	Hydrocarbons	烃类	-	-	4282-44-4	98684	101945	67332.6	1.7675e+06	1.47199e+06	1.43916e+06	1.21866	0.00463063	0.0906345	17.4601	4.12599	up
XMW0755	GC-MS	C20H32	m-Camphorene	间樟脑	Terpenoids	萜类	-	-	20016-73-3	27240.9	24376.2	9289.85	101296	57539.6	244723	1.0472	0.179624	0.263419	6.62582	2.7281	up
XMW0017	GC-MS	C17H34O2	Hexadecanoic acid, methyl ester	十六酸甲酯	Ester	酯	-	-	112-39-0	3214.56	2309.49	1733.48	7200.9	65353.7	11487.2	1.01151	0.304733	0.382247	11.5799	3.53356	up
XMW0230	GC-MS	C19H40	Pentadecane, 2,6,10,14-tetramethyl-	2,6,10,14-四甲基-十五烷	Hydrocarbons	烃类	-	-	1921-70-6	19634.2	12299.8	12618	102190	61666.1	170624	1.15706	0.0925089	0.191306	7.50763	2.90836	up
XMW1353	GC-MS	C17H32O2	(Z)-Ethyl pentadec-9-enoate	（Z）-十五碳九烯酸乙酯	Ester	酯	-	-	56219-09-1	1328.01	616.368	1154.13	2544.46	3341.38	8683.96	1.0436	0.18433	0.266618	4.7022	2.23334	up
XMW0636	GC-MS	C10H21I	1-iodo-Decane	1-碘-癸烷	Others	其它类	-	-	2050-77-3	472575	351914	266830	2935.96	5288.38	4165.74	1.21893	0.0264438	0.130844	0.0113533	-6.46074	down
KMW0713	GC-MS	C17H28O2	2,6,10-Dodecatrien-1-ol, 3,7,11-trimethyl-, acetate, (E,E)-	（E，E）-醋酸法呢酯	Ester	酯	-	-	4128-17-0	9	10666.4	9	76259.4	63285.7	138782	1.00958	0.0589125	0.162558	26.0499	4.70321	up
XMW1486	GC-MS	C17H28O2	5-Azulenemethanol, 1,2,3,4,5,6,7,8-octahydro-.alpha.,.alpha.,3,8-tetramethyl-, acetate, [3S-(3.alpha.,5.alpha.,8.alpha.)]-	[3S-（3α，5α。，8α。）]-5-天青烯乙醇，1,2,3,4,5,6,7,8-八氢-α，α，3,8-四甲基-乙酸酯	Ester	酯	-	-	134-28-1	150331	52593.4	136785	927006	1.34876e+06	2.9925e+06	1.15246	0.120637	0.215466	15.5081	3.95495	up
NMW0298	GC-MS	C14H26O4	Hexanedioic acid, bis(2-methylpropyl) ester	己二酸双（2-甲基丙基）酯	Ester	酯	-	-	141-04-8	74578	25560.8	53475.5	175806	113295	404379	1.01096	0.17609	0.260342	4.51442	2.17454	up
NMW0337	GC-MS	C14H26O4	Dibutyl adipate	己二酸二丁酯	Ester	酯	-	-	105-99-7	3856.86	4380.08	2770.44	11596.2	10222.6	35351	1.06747	0.199507	0.283095	5.19377	2.37678	up
XMW0221	GC-MS	C18H38	Heptadecane, 7-methyl-	7-甲基-十七烷	Hydrocarbons	烃类	-	-	20959-33-5	114302	58086.1	50199.4	385174	451989	1.03773e+06	1.14205	0.115904	0.211645	8.42316	3.07436	up
D242	GC-MS	C16H30O2	9-Tetradecen-1-ol, acetate, (E)-	（E）-9-四氢萘-1-醇乙酸酯	Ester	酯	-	-	23192-82-7	4917	3489.84	24152.4	49033.9	35801.6	77770.3	1.02288	0.0524857	0.15715	4.99414	2.32024	up
D398	GC-MS	C16H30O2	5-Tetradecen-1-ol, acetate, (Z)-	Z-5-十四碳烯基乙酸酯	Ester	酯	-	-	35153-13-0	11274.7	8681.34	10070.8	65826.9	64022.1	137970	1.18771	0.0827041	0.18287	8.91934	3.15694	up
XMW1491	GC-MS	C16H28O2	Lavandulyl caproate	辛酸癸酸	Acid	酸	-	-	59550-36-6	295787	218362	252400	3.08219e+06	2.66852e+06	3.99145e+06	1.216	0.0163788	0.122032	12.7091	3.66779	up
XMW1258	GC-MS	C15H24O3	Acetic acid, (4,6,8,9-tetramethyl-3-oxabicyclo[3.3.1]non-6-en-1-yl)methyl ester	（4,6,8,9-四甲基-3-氧杂双环[3.3.1]非6-烯-1-基）乙酸甲酯	Terpenoids	萜类	-	-	309722-81-4	429369	163338	353109	4.02003e+06	4.19104e+06	1.22808e+07	1.16704	0.139217	0.228841	21.6658	4.43735	up
w14	GC-MS	C16H34O	Octane, 1,1'-oxybis-	1,1'-氧双-辛烷	Hydrocarbons	烃类	-	-	629-82-3	19910	8497	10004	66324	58035	146422	1.13254	0.108549	0.20467	7.04957	2.81754	up
XMW1046	GC-MS	C14H26O3	Heptanoic acid, anhydride	庚酰基庚酸酯	Ester	酯	-	-	626-27-7	21269.9	13250.2	13215.8	49269	59840	83678.7	1.16533	0.0344532	0.133947	4.03864	2.01387	up
XMW0265	GC-MS	C17H36	Tetradecane, 2,6,10-trimethyl-	2,6,10-三甲基十四烷	Hydrocarbons	烃类	-	-	14905-56-7	12541.6	55820.5	12830.5	110466	329509	128840	1.06683	0.141408	0.230036	7.00575	2.80854	up
NMW0297	GC-MS	C16H32O	Oxirane, tetradecyl-	十四烷基-环氧乙烷	Hydrocarbons	烃类	-	-	7320-37-8	113939	55901	92008.5	933461	953182	2.61902e+06	1.17438	0.126784	0.219139	17.2071	4.10493	up
NMW0362	GC-MS	C17H21N	BenzphetAmine	苯丙胺	Amine	胺	-	-	156-08-1	60541.3	78764.4	124204	342034	213773	800215	1.06119	0.176067	0.260342	5.146	2.36345	up
D441	GC-MS	C15H26O2	Butanoic acid, 3-methyl-, 3,7-dimethyl-2,6-octadienyl ester, (Z)-	异戊酸内酯	Ester	酯	-	-	3915-83-1	47989	35710.6	43030.3	2.36874e+06	1.47362e+06	1.1612e+06	1.21577	0.0461357	0.152741	39.4821	5.30313	up
XMW1264	GC-MS	C15H26O2	Acetic acid, 1-methyl-3-(2,6,6-trimethylcyclohex-1-enyl)propyl ester	4-（2,6,6-三甲基环己烯-1-基）丁烷-2-基乙酸酯	Ester	酯	-	-	86756-12-9	72398.5	87497.3	82018.6	3.8674e+06	1.34796e+06	2.28412e+06	1.20442	0.081264	0.182704	31.0006	4.95422	up
KMW0638	GC-MS	C15H26O2	Geranyl isovalerate	异戊酸香叶基酯	Ester	酯	-	-	109-20-6	48841	52740.4	54459.8	897103	567122	1.01975e+06	1.21411	0.0290065	0.132208	15.9187	3.99265	up
NMW0280	GC-MS	C15H26O2	2-Furanmethanol, tetrahydro-.alpha.,.alpha.,5-trimethyl-5-(4-methyl-3-cyclohexen-1-yl)-, [2S-[2.alpha.,5.beta.(R*)]]-	[2S-[2α，5bR*）]]-四氢-α，α，5-三甲基-5-（4-甲基-3-环己烯-1-基）-2-呋喃甲醇	Terpenoids	萜类	-	-	26184-88-3	18603.7	25767.4	13879.1	67413.2	98874	129310	1.16691	0.0430396	0.149327	5.07462	2.3433	up
XMW0111	GC-MS	C15H24O2	Spiro[4.5]decan-7-one, 1,8-dimethyl-8,9-epoxy-4-isopropyl-	1,8-二甲基-8,9-环氧-4-异丙基-螺癸烷	Terpenoids	萜类	-	-	61050-91-7	680075	440661	814827	3.01465e+06	2.38098e+06	8.30498e+06	1.10874	0.171589	0.257312	7.07836	2.82342	up
XMW0972	GC-MS	C16H26O	Khusimyl methyl ether	苦参基甲基醚	Ether	醚	-	-	300349-20-6	399162	189441	329110	4.07982e+06	5.19991e+06	1.40561e+07	1.17763	0.141378	0.230036	25.4282	4.66836	up
NMW0318	GC-MS	C15H22O2	Curcumenol	姜黄烯醇	Terpenoids	萜类	-	-	19431-84-6	650640	218133	419693	5.0755e+06	6.06307e+06	1.59669e+07	1.16505	0.131598	0.222662	21.037	4.39486	up
NMW0277	GC-MS	C13H14O4	(S)-4-(1-Acetoxyallyl)phenyl acetate	（S）-4-（1-乙酰氧基烯丙基）苯乙酸酯	Ester	酯	-	-	52946-22-2	36686.3	32736.5	31616.8	538855	564375	818124	1.21919	0.0208819	0.130844	19.0158	4.24913	up
NMW0287	GC-MS	C17H28	1,8,11,14-Heptadecatetraene, (Z,Z,Z)-	（Z，Z，Z）-1,8,11,14-庚二烯	Hydrocarbons	烃类	-	-	10482-53-8	389988	163842	305313	3.76346e+06	4.19447e+06	1.10896e+07	1.17654	0.125021	0.218352	22.1703	4.47056	up
XMW1184	GC-MS	C15H20O2	Butanoic acid, 3-methyl-, 8-decene-4,6-diynyl ester, (Z)-	（Z）-8-癸烯-4,6-二炔-1-基3-甲基丁酸酯	Ester	酯	-	-	126693-81-0	9	9	9	20163	22807	55052.3	1.22136	0.100434	0.197257	3630.45	11.8259	up
D347	GC-MS	C14H28O2	n-Capric acid isobutyl ester	正癸酸异丁酯	Ester	酯	-	-	30673-38-2	13535.5	30005.9	12568.7	84857.7	181173	96053.7	1.14668	0.0739506	0.17521	6.4531	2.68999	up
KMW0642	GC-MS	C16H34	Hexadecane	十六烷	Hydrocarbons	烃类	-	-	544-76-3	3815.63	2698.43	6050.02	42554.8	27118.1	82771.9	1.16282	0.106179	0.20223	12.1334	3.60091	up
XMW0159	GC-MS	C16H34	2,6,10-Trimethyltridecane	2,6,10-三甲基十三烷	Hydrocarbons	烃类	-	-	3891-99-4	95686.6	185558	43910.2	4.03777e+06	2.2526e+06	2.14189e+06	1.18178	0.0474107	0.152921	25.9331	4.69672	up
D397	GC-MS	C14H26O2	11-Dodecen-1-yl acetate	11-十二烷基-1-基乙酸酯	Ester	酯	-	-	35153-10-7	48184.2	34151.7	79305	514906	213450	1.09487e+06	1.10709	0.165212	0.251105	11.2795	3.49563	up
KMW0585	GC-MS	C14H26O2	Citronellyl isobutyrate	异丁酸香茅酯	Ester	酯	-	-	97-89-2	227952	255733	209492	1.60855e+08	9.58307e+07	9.80914e+07	1.22341	0.0310808	0.132208	511.814	8.99948	up
D314	GC-MS	C14H26O2	8-Dodecen-1-ol, acetate, (Z)-	（Z）-8-十二烯-1-醇乙酸酯	Ester	酯	-	-	28079-04-1	44907.7	55431.5	51139.4	759009	490407	894408	1.21227	0.0304308	0.132208	14.1526	3.823	up
XMW1308	GC-MS	C10H17F3O2	1-Octyl trifluoroacetate	1-辛基三氟乙酸酯	Ester	酯	-	-	2561-21-9	17821.2	14897.2	53148.3	4.10812e+06	2.69684e+06	5.15464e+06	1.20726	0.0308472	0.132208	139.281	7.12186	up
XMW0916	GC-MS	C11H15Br	(5-bromopentyl)-Benzene,	（5-溴戊基）-苯	Halogenated hydrocarbons	卤代烃	-	-	14469-83-1	522938	634728	493587	1.96396e+08	1.16599e+08	1.1904e+08	1.22272	0.0317754	0.132208	261.641	8.03144	up
KMW0591	GC-MS	C14H24O2	Butanoic acid, 1,7,7-trimethylbicyclo[2.2.1]hept-2-yl ester, endo-	丁酸冰片酯	Ester	酯	-	-	13109-70-1	53073.7	35344.5	36254.4	1.69536e+07	1.03169e+07	1.08932e+07	1.22173	0.0268994	0.130844	306.112	8.25792	up
D246	GC-MS	C14H24O2	Propanoic acid, 2-methyl-, 3,7-dimethyl-2,6-octadienyl ester, (Z)-	[（2Z）-3,7-二甲基辛基-2,6-二烯基] 2-甲基丙酸酯	Ester	酯	-	-	2345-24-6	1.29491e+06	1.38724e+06	1.09764e+06	4.58533e+08	2.77469e+08	2.92816e+08	1.22296	0.0275956	0.130844	272.189	8.08847	up
KMW0647	GC-MS	C13H20O3	Methyl jasmonate	茉莉酸甲酯	Ester	酯	-	-	1211-29-6	43336.5	30564.6	36799.8	301170	242963	587893	1.18598	0.0854745	0.184821	10.226	3.35417	up
XMW0646	GC-MS	C13H20O3	2-Benzofurancarboxylic acid, 2,4,5,6,7,7a-hexahydro-4,4,7a-trimethyl-, methyl ester, cis-	顺式2,4,5,6,7,7a-六氢-4,4,7a-三甲基-2-苯并呋喃羧酸甲酯	Ester	酯	-	-	77383-92-7	369497	318112	358304	78303.7	102913	79056.7	1.21254	0.000654086	0.0533675	0.248848	-2.00666	down
XMW0749	GC-MS	C16H30	8-Hexadecyne	8-十六烷	Hydrocarbons	烃类	-	-	19781-86-3	110275	57799.6	78842.9	514729	365552	988667	1.15233	0.101528	0.197661	7.56911	2.92012	up
D241	GC-MS	C15H26O	3-Cyclohexene-1-methanol, .alpha.,4-dimethyl-.alpha.-(4-methyl-3-pentenyl)-, [R-(R*,R*)]-	[R-（R *，R *）]-α，4-二甲基-α-（4-甲基-3-戊烯基）-3-环己烯-1-甲醇	Terpenoids	萜类	-	-	23178-88-3	56097.8	82762.1	72740.2	2.40351e+06	1.81486e+06	2.31687e+06	1.22151	0.00740944	0.109917	30.8848	4.94883	up
XMW0389	GC-MS	C15H26O	Caryophyllenyl alcohol	石竹烯醇	Terpenoids	萜类	-	-	913176-41-7	14824.2	20032.1	7603.34	28280.8	31678.6	50269.2	1.01457	0.0605005	0.163782	2.59608	1.37634	up
KMW0687	GC-MS	C15H26O	1H-Cycloprop[e]azulen-4-ol, decahydro-1,1,4,7-tetramethyl-, [1aR-(1a.alpha.,4.beta.,4a.beta.,7.alpha.,7a.beta.,7b.alpha.)]-	（+）-香豆素醇	Terpenoids	萜类	-	-	552-02-3	32197.1	28317.6	52604.9	339292	246698	692026	1.1713	0.103023	0.199274	11.2979	3.49798	up
KMW0652	GC-MS	C15H26O	Cubenol	（-）-小茴香酚	Phenol	酚	-	-	21284-22-0	159720	157266	124622	994604	1.29581e+06	1.94577e+06	1.20321	0.0456686	0.152195	9.59265	3.26193	up
D319	GC-MS	C15H26O	.beta.-Acorenol	β-阿可诺尔	Terpenoids	萜类	-	-	28400-11-5	195070	157266	138012	986279	1.71927e+06	1.7362e+06	1.20237	0.0329577	0.132257	9.05836	3.17925	up
KMW0671	GC-MS	C15H26O	(1R,4R)-1-methyl-4-(6-Methylhept-5-en-2-yl)cyclohex-2-enol	姜油烯醇	Alcohol	醇	-	-	58334-55-7	60656.9	89595.3	78507.4	3.50641e+06	1.98294e+06	2.52759e+06	1.21789	0.0281958	0.131118	35.0453	5.13115	up
XMW0842	GC-MS	C15H26O	Palustrol (Ledum)	喇叭茶醇	Terpenoids	萜类	-	-	5986-49-2	34803.7	41702.6	38073.7	244773	146371	225209	1.20048	0.030377	0.132208	5.37923	2.4274	up
XMW0558	GC-MS	C15H26O	1,4-Methanoazulen-9-ol, decahydro-1,5,5,8a-tetramethyl-, [1R-(1.alpha.,3a.beta.,4.alpha.,8a.beta.,9S*)]-	[1R-（1α，3aβ，4α，8aβ，9S *） ]-十氢-1,5,5,8a-四甲基-1,4-甲烷七氮烯-9-醇	Terpenoids	萜类	-	-	465-24-7	15728	16024	13139	68912	58255	62451	1.21743	0.00222374	0.074624	4.22396	2.0786	up
KMW0685	GC-MS	C15H26O	trans-Farnesol	（E）-法尼醇	Terpenoids	萜类	-	-	106-28-5	176470	62735.2	89137.5	1.42851e+06	1.76333e+06	4.32869e+06	1.17286	0.120026	0.214803	22.9045	4.51756	up
XMW0027	GC-MS	C15H26O	Ledol	勒多尔	Terpenoids	萜类	-	-	577-27-5	743658	609362	770133	8.08679e+06	4.75288e+06	7.61331e+06	1.20805	0.0276103	0.130844	9.6333	3.26803	up
XMW0843	GC-MS	C15H26O	(2E,4S,7E)-4-Isopropyl-1,7-dimethylcyclodeca-2,7-dienol	（2E，4S，7E）-4-异丙基-1,7-二甲基环癸-2,7-二烯醇	Alcohol	醇	-	-	198991-79-6	9629	13795.1	4515.43	227108	92930.8	271356	1.17005	0.0724223	0.174301	21.1669	4.40374	up
KMW0661	GC-MS	C15H26O	.alpha.-Bisabolol	Α-没药醇	Alcohol	醇	-	-	515-69-5	259112	157361	197016	2.02566e+06	2.41711e+06	5.29043e+06	1.18853	0.0979396	0.19639	15.8653	3.9878	up
KMW0656	GC-MS	C15H26O	2-Naphthalenemethanol, decahydro-.alpha.,.alpha.,4a-trimethyl-8-methylene-, [2R-(2.alpha.,4a.alpha.,8a.beta.)]-	β-乙醛	Terpenoids	萜类	-	-	473-15-4	2097.97	1456.23	1396.2	38820.3	39333.4	54334.4	1.21785	0.0138878	0.120616	26.7631	4.74218	up
KMW0667	GC-MS	C15H26O	.tau.-Muurolol	丁三醇	Alcohol	醇	-	-	19912-62-0	215420	131760	186106	1.07502e+06	876920	1.98599e+06	1.17345	0.079108	0.181367	7.38428	2.88446	up
D244	GC-MS	C15H26O	(3S,3aR,3bR,4S,7R,7aR)-4-Isopropyl-3,7-dimethyloctahydro-1H-cyclopenta[1,3]cyclopropa[1,2]benzen-3-ol	（3S，3aR，3bR，4S，7R，7aR）-4-异丙基-3,7-二甲基八氢-1H-环戊[1,3]环丙烷[1,2]苯-3-3-醇	Terpenoids	萜类	-	-	23445-02-5	1.88311e+08	1.59363e+08	1.88169e+08	1.24895e+09	8.70453e+08	1.45427e+09	1.20599	0.027029	0.130844	6.66926	2.73753	up
KMW0673	GC-MS	C15H26O	.alpha.-Cadinol	α-卡迪诺	Terpenoids	萜类	-	-	481-34-5	206758	127365	183994	1.07804e+06	883137	1.98614e+06	1.1755	0.0774862	0.179681	7.61858	2.92952	up
NMW0310	GC-MS	C15H26O	2,6,10-Dodecatrien-1-ol, 3,7,11-trimethyl-	3,7,11-三甲基-2,6,10-十二碳三烯-1-醇	Terpenoids	萜类	-	-	4602-84-0	208550	49502.2	118625	1.74957e+06	2.20078e+06	5.53964e+06	1.15845	0.125963	0.219139	25.1939	4.655	up
XMW0854	GC-MS	C15H26O	4a(2H)-Naphthalenol, 1,3,4,5,6,8a-hexahydro-4,7-dimethyl-1-(1-methylethyl)-, (1S,4S,4aS,8aR)-	（1S，4S，4aS，8aR）-1,3,4,5,6,8a-六氢-4,7-二甲基-1-（1-甲基乙基）-4a（2H）-萘	Terpenoids	萜类	-	-	73365-77-2	85705.8	117270	110342	1.23744e+06	1.00488e+06	1.47341e+06	1.21708	0.0135822	0.120616	11.8593	3.56794	up
XMW0705	GC-MS	C15H26O	2-Naphthalenemethanol, 1,2,3,4,4a,5,6,8a-octahydro-.alpha.,.alpha.,4a,8-tetramethyl-, [2R-(2.alpha.,4a.alpha.,8a.beta.)]-	[2R-（2α，4a ，8aβ]]-1,2,3,4,4a，5,6,8a-八氢-α，α，4a，8-四甲基-2-萘甲醇	Terpenoids	萜类	-	-	473-16-5	3211.93	1843.21	2407.35	26028.2	29810.8	53812.1	1.19823	0.0591835	0.162558	14.6936	3.87712	up
WMW0149	GC-MS	C15H26O	Cedrol	雪松	Terpenoids	萜类	-	-	77-53-2	75967.9	79782.7	81536	1.33274e+06	689296	1.58111e+06	1.20241	0.0517733	0.156015	15.1848	3.92456	up
XMW0627	GC-MS	C12H14O4	Diethyl Phthalate	邻苯二甲酸二乙酯	Ester	酯	-	-	84-66-2	68381.3	49365	110596	653837	346127	1.42601e+06	1.12783	0.149712	0.236264	10.6243	3.4093	up
XMW1017	GC-MS	C16H28	1,E-11,Z-13-Hexadecatriene	Z-13-十六碳三烯-E-11-1	Hydrocarbons	烃类	-	-	80634-97-5	89887.9	133824	119578	2.5466e+06	1.60849e+06	2.48577e+06	1.2155	0.0200575	0.130844	19.3447	4.27387	up
XMW1167	GC-MS	C15H24O	(1R,3E,7E,11R)-1,5,5,8-Tetramethyl-12-oxabicyclo[9.1.0]dodeca-3,7-diene	（1R，3E，7E，11R）-1,5,5,8-四甲基-12-氧杂双环[9.1.0]十二烷基-3,7-二烯	Terpenoids	萜类	-	-	19888-34-7	46004.9	48937.4	47553.5	827981	540007	1.13592e+06	1.21026	0.0446044	0.150498	17.5718	4.13519	up
D337	GC-MS	C15H24O	2H-2a,7-Methanoazuleno[5,6-b]oxirene, octahydro-3,6,6,7a-tetramethyl-	α-雪松烯环氧化物	Terpenoids	萜类	-	-	29597-36-2	14714.1	12668	9563.65	137245	90703.8	195454	1.19662	0.0508033	0.156015	11.4601	3.51855	up
XMW0054	GC-MS	C15H24O	Farnesene epoxide, E-	E-法呢烯环氧化物	Terpenoids	萜类	-	-	83637-40-5	42433.7	49715.8	54033.1	2.66555e+06	1.16075e+06	1.74998e+06	1.2134	0.0538134	0.158089	38.146	5.25346	up
XMW1180	GC-MS	C15H24O	(1R,1aR,2aS,5R,6R,6aS,7aS)-1,6,6a-trimethyldecahydro-1,2a-methanocyclopropa[b]naphthalen-5-ol	（1R，1aR，2aS，5R，6R，6aS，7aS）-1,6,6a-三甲基十氢-1,2-a-甲基环丙烷[b]萘-5-醇	Terpenoids	萜类	-	-	860769-47-7	2.44532e+07	6.47149e+06	2.20391e+07	23818.2	72906.8	67544.4	1.2036	0.0890271	0.186687	0.00310154	-8.3328	down
D177	GC-MS	C15H24O	(1aR,1bS,2aS,5S,5aS,7aS)-2,2,5,7a-Tetramethyldecahydrocyclopenta[2',3']cyclobuta[1',2':3,4]benzo[1,2-b]oxirene	（1aR，1bS，2aS，5S，5aS，7aS）-2,2,2,5,7a-四甲基十氢环戊[2'，3']环丁[1'，2'：3,4]苯并[1,2-b]环氧乙烷	Terpenoids	萜类	-	-	104188-24-1	11463.3	21153.1	11732.2	59942.5	115780	60186.1	1.15769	0.0712221	0.173256	5.31943	2.41127	up
w05	GC-MS	C15H24O	2,6,10-Dodecatrienal, 3,7,11-trimethyl-	3,7,11-三甲基-2,6,10-十二烷基	Terpenoids	萜类	-	-	19317-11-4	10500	5226.13	10552.2	272292	193468	521464	1.19788	0.0834348	0.183117	37.5679	5.23143	up
NMW0319	GC-MS	C15H24O	2,6,10-Dodecatrienal, 3,7,11-trimethyl-, (E,E)-	（E，E）-3,7,11-三甲基-2,6,10-十二烷基	Hydrocarbons	烃类	-	-	502-67-0	198164	76123	99502.1	1.76815e+06	2.17762e+06	5.54138e+06	1.17609	0.126049	0.219139	25.381	4.66568	up
KMW0636	GC-MS	C15H24O	1H-3a,7-Methanoazulen-5-ol, octahydro-3,8,8-trimethyl-6-methylene-	雪松醇	Alcohol	醇	-	-	28231-03-0	65128.6	71880.4	75147.3	910434	609710	1.36806e+06	1.20388	0.055982	0.160789	13.6136	3.76697	up
XMW1177	GC-MS	C15H24O	11,11-Dimethyl-4,8-dimethylenebicyclo[7.2.0]undecan-3-ol	11,11-二甲基-4,8-​​二亚甲基双环[7.2.0]十一碳三醇	Alcohol	醇	-	-	79580-01-1	82401.7	59791.3	69780.3	395820	237887	651164	1.15204	0.0966801	0.195495	6.06147	2.59967	up
D318	GC-MS	C15H24O	.beta.-Oplopenone	β-奥普拉酮	Terpenoids	萜类	-	-	28305-60-4	116067	71435.3	148912	812116	423563	1.12166e+06	1.14471	0.0775782	0.179681	7.00725	2.80885	up
D428	GC-MS	C15H24O	6-Methyl-2-(4-methylcyclohex-3-en-1-yl)hepta-1,5-dien-4-ol	6-甲基-2-（4-甲基环己-3-烯-1-基）庚-1,5-二烯-4-醇	Terpenoids	萜类	-	-	38142-56-2	260795	201753	245721	1.57086e+06	1.15051e+06	2.8764e+06	1.17753	0.0882025	0.186376	7.90346	2.98248	up
XMW1035	GC-MS	C15H24O	(-)-Spathulenol	（-）-芦丁烯醇	Terpenoids	萜类	-	-	77171-55-2	1954.87	9	9	75375	58205.2	151401	1.09464	0.0810173	0.182658	144.45	7.17442	up
D419	GC-MS	C15H24O	2-Penten-1-ol, 2-methyl-5-(2-methyl-3-methylenebicyclo[2.2.1]hept-2-yl)-, [1S-[1.alpha.,2.alpha.(E),4.alpha.]]-	反β-檀香醇	Terpenoids	萜类	-	-	37172-32-0	141143	43909.6	57422.4	1.26936e+06	1.55932e+06	4.09336e+06	1.17002	0.130947	0.222374	28.5474	4.83529	up
WMW0022	GC-MS	C15H24O	Salvial-4(14)-en-1-one	丹参酮	Terpenoids	萜类	-	-	73809-82-2	174775	115935	281346	1.79109e+06	983858	3.78084e+06	1.13687	0.137996	0.228188	11.46	3.51854	up
D254	GC-MS	C15H24O	2H-2,4a-Methanonaphthalen-8(5H)-one, 1,3,4,6,7,8a-hexahydro-1,1,5,5-tetramethyl-	1，1,3,4,6,7,8a-六氢-1,1,5,5-四甲基-2H-2,4a-甲烷萘-8（5H）酮	Terpenoids	萜类	-	-	23787-90-8	35634.1	30869.7	40803.6	570939	289534	724708	1.19567	0.060782	0.164066	14.7723	3.88483	up
XMW0203	GC-MS	C14H20O2	2,5-di-tert-Butyl-1,4-benzoquinone	1,5-二叔丁基-1,4-苯醌	Aromatics	芳烃	-	-	2460-77-7	17561.6	21186.1	27848.3	155749	97306.7	346458	1.14411	0.141866	0.230036	9.00226	3.17029	up
XMW0479	GC-MS	C13H16O3	cis-3-Hexenyl salicylate	顺-3-己烯基水杨酸酯	Ester	酯	-	-	65405-77-8	221857	246381	171779	2.33578e+06	4.11444e+06	5.46631e+06	1.20395	0.0534549	0.157757	18.6191	4.21871	up
XMW1421	GC-MS	C13H16O3	3,4-Hexanedione, 1-(phenylmethoxy)-	1-（苯甲氧基）-3,4-己二酮	Ketone	酮	-	-	118006-73-8	930557	278067	556906	7.70782e+06	9.50582e+06	2.49156e+07	1.16431	0.132552	0.222782	23.8621	4.57665	up
NMW0247	GC-MS	C15H22O	Furan, 3-(4,8-dimethyl-3,7-nonadienyl)-, (E)-	（E）-3-（4,8-二甲基-3,7-壬二烯基）-呋喃	Terpenoids	萜类	-	-	23262-34-2	11322.8	16265	5350.21	426900	105386	216468	1.15899	0.126884	0.219139	22.7322	4.50666	up
NMW0308	GC-MS	C15H22O	2,6,9,11-Dodecatetraenal, 2,6,10-trimethyl-	2,6,10-三甲基-2,6,9,11-十二碳烯醛	Terpenoids	萜类	-	-	4955-32-2	594019	146237	261186	5.17144e+06	6.24888e+06	1.65874e+07	1.16246	0.131663	0.222662	27.9674	4.80567	up
XMW1000	GC-MS	C15H22O	(E)-5-((1R,3R,6S)-2,3-Dimethyltricyclo[2.2.1.02,6]heptan-3-yl)-2-methylpent-2-enal	（E）-5-（（（1R，3R，6S）-2,3-二甲基三环[2.2.1.02,6]庚基-3-基）-2-甲基-戊-2-烯	Terpenoids	萜类	-	-	19903-70-9	337687	147340	330711	2.90476e+06	4392499	8.49891e+06	1.17726	0.0960863	0.194667	19.3643	4.27532	up
D438	GC-MS	C15H22O	Sesquirosefuran	倍半乳糖呋喃	Heterocyclic compound	杂环化合物	-	-	39007-93-7	46913.5	55478.8	13314.3	1.35052e+06	347764	683051	1.13874	0.124212	0.218352	20.5808	4.36323	up
XMW1022	GC-MS	C15H22O	3,7-Cyclodecadien-1-one, 3,7-dimethyl-10-(1-methylethylidene)-, (E,E)-	（E，E）-3,7-二甲基-10-（1-甲基亚乙基）-3,7-环十二烷基-1-酮	Terpenoids	萜类	-	-	6902-91-6	169199	101314	126288	691428	525833	1.55079e+06	1.13979	0.13007	0.221223	6.97591	2.80238	up
XMW0205	GC-MS	C15H10N2	Benzimidazo[2,1-a]isoquinoline	苯并咪唑[2,1-a]异喹啉	Heterocyclic compound	杂环化合物	-	-	239-44-1	5833.33	9620.58	6057.61	65583.6	49374.9	120225	1.18475	0.0793775	0.181506	10.9329	3.4506	up
w42	GC-MS	C14H30O	2-Ethyl-1-dodecanol	2-乙基-1-十二烷醇	Alcohol	醇	-	-	19780-33-7	3911.19	2949.33	6442.29	43819.6	27310.2	83080.7	1.16211	0.104284	0.199989	11.5923	3.5351	up
KMW0726	GC-MS	C14H30O	1-Tetradecanol	十四醇	Alcohol	醇	-	-	112-72-1	137631	60316.6	108716	1.15325e+06	1.30348e+06	3.42663e+06	1.17335	0.126781	0.219139	19.185	4.26191	up
D204	GC-MS	C13H26O2	Pentyl octanoate	辛酸戊酯	Ester	酯	-	-	638-25-5	81075.9	96200.7	66892.4	3.38958e+07	2.01737e+07	2.07284e+07	1.22245	0.0310535	0.132208	306.336	8.25897	up
XMW1345	GC-MS	C13H26O2	Octanoic acid, 3-methylbutyl ester	3-甲基丁酯辛酸	Ester	酯	-	-	2035-99-6	100166	175867	88169.6	4.99242e+06	2.61535e+06	2.2545e+06	1.20295	0.066202	0.170231	27.0791	4.75911	up
XMW1242	GC-MS	C12H22O3	Hexanoic acid, anhydride	己酸己酯	Ester	酯	-	-	2051-49-2	255221	236147	345019	78069.1	54597.8	74067.7	1.1951	0.0206949	0.130844	0.247176	-2.01639	down
XMW0419	GC-MS	C15H32	Tetradecane, 2-methyl-	二甲基十六烷	Hydrocarbons	烃类	-	-	1560-95-8	26984.5	29872.5	25649.1	383517	223440	464206	1.20539	0.0430927	0.149327	12.9828	3.69853	up
XMW0200	GC-MS	C15H32	Tetradecane, 4-methyl-	四甲基十四烷	Hydrocarbons	烃类	-	-	25117-24-2	26435.7	29999.6	24368.4	370104	211368	444727	1.20363	0.0444444	0.150498	12.6999	3.66674	up
D399	GC-MS	C14H28O	cis-9-Tetradecen-1-ol	豆蔻醇	Alcohol	醇	-	-	35153-15-2	132904	58806.6	106528	1.15325e+06	1.29334e+06	3.38764e+06	1.17476	0.125051	0.218352	19.5623	4.29	up
KMW0640	GC-MS	C14H28O	Tetradecanal	十四烷基醛	Aldehyde	醛	-	-	124-25-4	8810.99	8532.12	6763.59	71991.6	53142.8	121084	1.19391	0.0671994	0.170418	10.2137	3.35243	up
D382	GC-MS	C14H28O	Myristoleyl Alcohol	麦里斯托利醇	Alcohol	醇	-	-	34010-15-6	137631	60626	109459	1.16096e+06	1.30964e+06	3.49322e+06	1.17289	0.129406	0.221223	19.381	4.27657	up
WMW0130	GC-MS	C15H30	1-Pentadecene	1-十五碳烯	Hydrocarbons	烃类	-	-	13360-61-7	47200.9	50922.5	62423.4	524619	495719	538833	1.22226	0.000197107	0.0272159	9.71162	3.27971	up
XMW0062	GC-MS	C13H22O2	2-Propenoic acid, 2-methyl-, 3,3,5-trimethylcyclohexyl ester	甲基丙烯酸 3,3,5-三甲基环己酯	Ester	酯	-	-	7779-31-9	9	9	9	72804.7	41482.6	76479.5	1.22394	0.029173	0.132208	7065.43	12.7866	up
D354	GC-MS	C13H22O2	3-Cyclohexene-1-carboxAldehyde, 4-(4-hydroxy-4-methylpentyl)-	4-（4-羟基-4-甲基戊基）-3-环己烯-1-甲醛	Aldehyde	醛	-	-	31906-04-4	161063	106015	118679	1.72133e+06	1.68658e+06	2.66078e+06	1.21184	0.0269485	0.130844	15.7319	3.97562	up
XMW0133	GC-MS	C13H20O2	6-Methyl-6-(5-methylfuran-2-yl)heptan-2-one	6-甲基-6-（5-甲基呋喃-2-基）庚烷-2-酮	Ketone	酮	-	-	50464-95-4	328457	300228	203851	28028.2	134172	62473.8	1.02996	0.0154663	0.121231	0.269867	-1.88968	down
KMW0639	GC-MS	C13H20O2	3-Buten-2-one, 4-(2,2,6-trimethyl-7-oxabicyclo[4.1.0]hept-1-yl)-	环氧-β-紫罗兰酮	Terpenoids	萜类	-	-	23267-57-4	94463.9	120307	62452.9	1.846e+07	1.14848e+07	1.21526e+07	1.21965	0.0244756	0.130844	151.853	7.24653	up
NMW0258	GC-MS	C12H17NO2	Fenobucarb	异丁威	Ester	酯	-	-	3766-81-2	92361.3	91308.2	100353	1.04795e+06	743575	1.80173e+06	1.19788	0.0725463	0.174301	12.6513	3.66121	up
XMW1336	GC-MS	C11H13NO3	N-Benzyloxy-2-carbomethoxyaziridine	1-苯基甲氧基氮丙啶-2-羧酸甲酯	Ester	酯	-	-	53084-33-6	1.55143e+06	6.37608e+06	1.29999e+06	1.26563e+07	2.79374e+07	1.37567e+07	1.06948	0.0800286	0.181737	5.89005	2.55828	up
XMW1364	GC-MS	C15H26	7-Octylidenebicyclo[4.1.0]heptane	7-辛二烯双环[4.1.0]庚烷	Terpenoids	萜类	-	-	82253-11-0	1.05496e+06	1.50767e+06	869523	1.50444e+07	1.5493e+07	1.27523e+07	1.21524	0.00283177	0.0782005	12.613	3.65684	up
D216	GC-MS	C14H22O	.alpha.-Irone	甲基Α-紫罗兰酮	Ketone	酮	-	-	79-69-6	8.04996e+06	1.09194e+07	7.19706e+06	1.0006e+08	8.49145e+07	1.20253e+08	1.21504	0.01116	0.120616	11.6648	3.5441	up
D352	GC-MS	C14H22O	2-Butenal, 2-methyl-4-(2,6,6-trimethyl-1-cyclohexen-1-yl)-	2-甲基-4-（2,6,6-三甲基-1-环己烯-1-基）-2-丁烯醛	Aldehyde	醛	-	-	3155-71-3	69686.7	62838.2	61851.7	2.25152e+06	1.48984e+06	1.68823e+06	1.22134	0.0166553	0.12303	27.9334	4.80392	up
XMW0473	GC-MS	C13H18O2	Benzoic acid, hexyl ester	苯甲酸己酯	Ester	酯	-	-	6789-88-4	71696	124519	52432.1	1.21667e+06	1.01678e+06	1.29681e+06	1.20319	0.00373073	0.088114	14.1979	3.8276	up
NMW0265	GC-MS	C13H18O2	Ibuprofen	布洛芬	Acid	酸	-	-	15687-27-1	115057	178613	117931	1.41397e+06	2.12318e+06	1.65847e+06	1.21403	0.015845	0.121383	12.6229	3.65797	up
XMW1016	GC-MS	C13H18O2	(4,4-Dimethyl-2,4,5,6-tetrahydro-1H-inden-2-yl)acetic Acid	（4,4-二甲基-2,4,5,6-四氢-1H-茚满-2-基）乙酸	Acid	酸	-	-	113522-67-1	23463.3	9249.28	21862.4	339008	314319	1.29531e+06	1.16435	0.189761	0.272279	35.7057	5.15808	up
XMW0040	GC-MS	C12H14O3	Phenol, 2-methoxy-4-(1-propenyl)-, acetate	乙酸异丁香酚酯	Ester	酯	-	-	93-29-8	29538.1	26764	35442.2	495380	239630	724708	1.18695	0.0827878	0.18287	15.9107	3.99193	up
XMW1153	GC-MS	C15H24	1R,4R,7R,11R-1,3,4,7-Tetramethyltricyclo[5.3.1.0(4,11)]undec-2-ene	1R，4R，7R，11R-1,3,4,7-四甲基三环[5.3.1.0（4,11）]十一烷基-2-烯	Terpenoids	萜类	-	-	137235-59-7	656865	1.0218e+06	551071	1.48429e+06	3.63321e+06	2.44582e+06	1.0845	0.0968219	0.195495	3.39202	1.76215	up
KMW0566	GC-MS	C15H24	(4aR-trans)-decahydro-4a-methyl-1-methylene-7-(1-methylethylidene)-Naphthalene	γ-芹子烯	Terpenoids	萜类	-	-	515-17-3	226799	155848	182177	4.20368e+07	2.64974e+07	2.81185e+07	1.22187	0.0228969	0.130844	171.12	7.41886	up
XMW0197	GC-MS	C15H24	(1S,4S,4aS)-1-Isopropyl-4,7-dimethyl-1,2,3,4,4a,5-hexahydronaphthalene	（1S，4S，4aS）-1-异丙基-4,7-二甲基-1,2,3,4,4a，5-六氢萘	Terpenoids	萜类	-	-	267665-20-3	4.02514e+06	4.24825e+06	3.76995e+06	5.84954e+07	3.40799e+07	7.1975e+07	1.20567	0.0444245	0.150498	13.6632	3.77222	up
KMW0582	GC-MS	C15H24	.beta.-Guaiene	β-番石榴烯	Terpenoids	萜类	-	-	88-84-6	2.95888e+06	3.70978e+06	3.69893e+06	4.1928e+07	2.45934e+07	4.14117e+07	1.20871	0.0291141	0.132208	10.4106	3.37999	up
XMW0264	GC-MS	C15H24	Bicyclo[4.4.0]dec-1-ene, 2-isopropyl-5-methyl-9-methylene-	2-异丙基-5-甲基-9-亚甲基-双环[4.4.0]癸-1-烯	Terpenoids	萜类	-	-	150320-52-8	1.88311e+08	1.59378e+08	1.88169e+08	1.21152e+09	8.73812e+08	1.4063e+09	1.20802	0.0236703	0.130844	6.51596	2.70398	up
XMW0468	GC-MS	C15H24	Bicyclo[3.1.1]hept-2-ene, 2,6-dimethyl-6-(4-methyl-3-pentenyl)-	2,6-二甲基-6-（4-甲基-3-戊烯基）-双环[3.1.1]庚-2-烯	Terpenoids	萜类	-	-	17699-05-7	1.23374e+08	1.13869e+08	9.02083e+07	9	9	9	1.2255	0.00806249	0.112579	8.24551e-08	-23.5318	down
D300	GC-MS	C15H24	Aristolochene	马兜铃属	Terpenoids	萜类	-	-	26620-71-3	370866	437872	308379	1.05564e+08	6.83147e+07	6.75259e+07	1.22274	0.0236809	0.130844	216.096	7.75553	up
GMW0078	GC-MS	C15H24	.beta.-Bisabolene	β-红没药烯	Terpenoids	萜类	-	-	495-61-4	7.76779e+06	6.88087e+06	8.27841e+06	9.84603e+07	4.60888e+07	9.65239e+07	1.1945	0.0512661	0.156015	10.5148	3.39435	up
XMW0743	GC-MS	C15H24	(-)-Aristolene	（-）-马兜铃烯	Terpenoids	萜类	-	-	6831-16-9	1.92337e+07	2.28167e+07	1.39603e+07	1.12144e+08	5.76862e+07	6.13594e+07	1.149	0.0768981	0.179399	4.1276	2.0453	up
XMW0549	GC-MS	C15H24	(1S,4aR,7R)-1,4a-Dimethyl-7-(prop-1-en-2-yl)-1,2,3,4,4a,5,6,7-octahydronaphthalene	（1S，4aR，7R）-1,4a-二甲基-7-（丙烯基）-1,2,3,4,4a，5,6,7-八氢萘	Terpenoids	萜类	-	-	52026-55-8	593536	914767	489475	2.38689e+07	1.21698e+07	1.19268e+07	1.20504	0.0600868	0.163177	24.0094	4.58553	up
KMW0555	GC-MS	C15H24	trans-.alpha.-Bergamotene	（E）-α-佛手柑	Terpenoids	萜类	-	-	13474-59-4	3.80282e+07	8.89289e+06	3.28791e+07	9	9	9	1.22355	0.0975272	0.196203	3.38345e-07	-21.495	down
XMW0182	GC-MS	C15H24	(3S,3aS,6R,8aS)-3,8,8-Trimethyl-7-methyleneoctahydro-1H-3a,6-methanoazulene	吡嗪烯	Terpenoids	萜类	-	-	31145-21-8	7.46075e+06	1.10011e+07	6.0221e+06	2.029e+08	1.062e+08	9.22121e+07	1.19793	0.068658	0.171049	16.3908	4.03482	up
XMW0469	GC-MS	C15H24	(1R,3aS,8aS)-7-Isopropyl-1,4-dimethyl-1,2,3,3a,6,8a-hexahydroazulene	愈创木6,9-二烯	Terpenoids	萜类	-	-	36577-33-0	1.92363e+07	2.28127e+07	1.40229e+07	1.15789e+08	5.72864e+07	6.66358e+07	1.15168	0.0750132	0.177169	4.27507	2.09595	up
WMW0012	GC-MS	C15H24	(+)-epi-Bicyclosesquiphellandrene	（+）-表-双环倍半萜类烯	Terpenoids	萜类	-	-	54274-73-6	529666	485659	519132	2.62085e+08	1.72785e+08	1.75767e+08	1.22402	0.0201733	0.130844	397.95	8.63644	up
D353	GC-MS	C15H24	(S,1Z,6Z)-8-Isopropyl-1-methyl-5-methylenecyclodeca-1,6-diene	（1Z，6Z，8S）-1-甲基-5-亚甲基-8-丙-2-基环癸-1,6-二烯	Terpenoids	萜类	-	-	317819-80-0	1.04457e+07	1.31997e+07	8.67901e+06	1.26809e+08	7.03403e+07	9.50592e+07	1.20309	0.0330826	0.132257	9.03987	3.1763	up
WMW0052	GC-MS	C15H24	(E)-1-Methyl-4-(6-methylhept-5-en-2-ylidene)cyclohex-1-ene	（E）-1-甲基-4-（6-甲基庚-5-烯-2-亚烷基）环己-1-烯	Terpenoids	萜类	-	-	53585-13-0	8.9284e+06	1.10867e+07	6.65287e+06	1.35911e+08	1.08113e+08	1.00753e+08	1.21456	0.00926963	0.11885	12.9285	3.69249	up
D338	GC-MS	C15H24	1-methyl-4-(1,2,2-trimethylcyclopentyl)cyclohexa-1,3-diene	1-甲基-4-(1,2,2-三甲基环戊基)环己-1,3-二烯	Terpenoids	萜类	-	-	29621-78-1	6.0849e+07	4.88526e+07	5.81027e+07	6.47358e+08	3.66842e+08	7.2699e+08	1.20149	0.0406058	0.145775	10.3763	3.37522	up
KMW0597	GC-MS	C15H24	.gamma.-Muurolene	γ-茂丁烯	Terpenoids	萜类	-	-	30021-74-0	1.19973e+06	9	9	2.41257e+08	1.72729e+08	1.75863e+08	1.04187	0.0126935	0.120616	491.643	8.94147	up
XMW0142	GC-MS	C15H24	3a,7-Methano-3aH-cyclopentacyclooctene, 1,4,5,6,7,8,9,9a-octahydro-1,1,7-trimethyl-, [3aR-(3a.alpha.,7.alpha.,9a.beta.)]-	（-）-丁香三环烯	Terpenoids	萜类	-	-	469-92-1	1.34466e+06	1.81824e+06	912566	4.72031e+06	4.75952e+06	5.62401e+06	1.17075	0.000787029	0.0601896	3.70604	1.88988	up
XMW0147	GC-MS	C15H24	1-Methyl-4-(6-methylhept-5-en-2-yl)cyclohexa-1,3-diene	1-甲基-4-（6-甲基庚-5-烯-2-基）环己-1,3-二烯	Terpenoids	萜类	-	-	451-55-8	285587	344585	248690	1.22996e+08	7.95687e+07	7.86167e+07	1.22323	0.0236723	0.130844	319.938	8.32165	up
XMW0388	GC-MS	C15H24	(4aR,8aR)-5,8a-dimethyl-3-propan-2-ylidene-1,2,4,4a,7,8-hexahydronaphthalene	（4aR，8aR）-5,8a-二甲基-3-丙烷-2-亚烷基-1,2,4,4a，7,8-六氢萘	Terpenoids	萜类	-	-	6813-21-4	4.85608e+06	7.46208e+06	4.37181e+06	4.41603e+07	5.37229e+07	4.71953e+07	1.21143	0.00197385	0.0738137	8.69256	3.11978	up
XMW1408	GC-MS	C15H24	1H-Cyclopropa[a]naphthalene, 1a,2,3,3a,4,5,6,7b-octahydro-1,1,3a,7-tetramethyl-, [1aR-(1a.alpha.,3a.alpha.,7b.alpha.)]-	[1aR-（1aα。，3a。 ，7b.α。）]-1a，2,3,3a，4,5,6,7b-八氢-1,1,3a，7-四甲基-1H-环丙烷[a]萘	Terpenoids	萜类	-	-	489-29-2	430126	3.31501e+06	505248	4.64409e+06	1.52583e+07	6.56225e+06	1.01377	0.142836	0.230216	6.22642	2.6384	up
D341	GC-MS	C15H24	Naphthalene, decahydro-1,6-bis(methylene)-4-(1-methylethyl)-, (4.alpha.,4a.alpha.,8a.alpha.)-	十氢-1,6-双（亚甲基）-4-（1-甲基乙基）-，（4α，4aα，8aα）-萘	Terpenoids	萜类	-	-	30021-46-6	353286	359084	305161	5.15692e+06	2.9813e+06	6.32157e+06	1.20533	0.0445205	0.150498	14.2107	3.8289	up
XMW0825	GC-MS	C15H24	Bicyclo[3.1.1]heptane, 6-methyl-2-methylene-6-(4-methyl-3-pentenyl)-, [1R-(1.alpha.,5.alpha.,6.beta.)]-	[1R-（1α，5α，6β）]-6-甲基-2-亚甲基-6-（4-甲基-3-戊烯基）-双环[3.1.1]庚烷	Terpenoids	萜类	-	-	55123-21-2	6.07398e+06	7.75235e+06	4.79633e+06	8.91531e+07	4.71314e+07	4.09718e+07	1.18898	0.0726336	0.174301	9.51831	3.25071	up
KMW0622	GC-MS	C15H24	Cyclohexene, 3-(1,5-dimethyl-4-hexenyl)-6-methylene-, [S-(R*,S*)]-	β-倍半萜类烯	Terpenoids	萜类	-	-	20307-83-9	696419	933930	545587	2.95233e+07	3.12942e+06	1.33217e+07	1.09484	0.197828	0.281602	21.1286	4.40112	up
KMW0614	GC-MS	C15H24	Cubenene	卡丁二烯	Terpenoids	萜类	-	-	29837-12-5	4.10571e+06	4.7282e+06	3.13269e+06	8.16353e+07	6.68752e+07	5.52333e+07	1.21739	0.0137272	0.120616	17.026	4.08967	up
NMW0206	GC-MS	C15H24	(1R,9R,E)-4,11,11-Trimethyl-8-methylenebicyclo[7.2.0]undec-4-ene	（1R，9R，E）-4,11,11-三甲基-8-亚甲基双环[7.2.0]十一烷基-4-烯	Terpenoids	萜类	-	-	68832-35-9	9.90491e+06	1.57828e+07	8.01403e+06	2.37245e+06	1.32842e+06	2.14936e+06	1.17165	0.0555986	0.160449	0.173588	-2.52626	down
KMW0603	GC-MS	C15H24	Germacrene D	大根香叶烯D	Terpenoids	萜类	-	-	23986-74-5	1.20053e+06	3.43874e+06	630922	2.62085e+08	1.72785e+08	1.75775e+08	1.20072	0.0203387	0.130844	115.868	6.85633	up
D293	GC-MS	C15H24	Cyclohexene, 4-[(1E)-1,5-dimethyl-1,4-hexadien-1-yl]-1-methyl-	4-[（（1E）-1,5-二甲基-1,4-己二-1-基] -1-甲基-环己烯	Terpenoids	萜类	-	-	25532-79-0	3.12258e+07	2.62972e+07	3.18842e+07	4.00909e+08	2.08753e+08	4.12133e+08	1.20168	0.0421725	0.149252	11.4286	3.51457	up
WMW0053	GC-MS	C15H24	Benzene, 1-(1,5-dimethylhexyl)-4-methyl-	1-（1,5-二甲基己基）-4-甲基-苯	Terpenoids	萜类	-	-	1461-02-5	5.90169e+06	7.47539e+06	4.50007e+06	8.97133e+07	4.73127e+07	4.72341e+07	1.19546	0.0588266	0.162558	10.307	3.36555	up
XMW0948	GC-MS	C15H24	Valerena-4,7(11)-diene	（4S，7R，7aR）-2,4,5,6,7,7a-六氢-3,7-二甲基-4-（2-甲基-1-丙烯-1-基）-1H-茚	Terpenoids	萜类	-	-	351222-66-7	1.16398e+06	1.15744e+06	1.0366e+06	1.63221e+07	9.62184e+06	1.99919e+07	1.20627	0.0428139	0.149327	13.6794	3.77393	up
KMW0556	GC-MS	C15H24	Naphthalene, decahydro-4a-methyl-1-methylene-7-(1-methylethenyl)-, [4aR-(4a.alpha.,7.alpha.,8a.beta.)]-	β-芹子烯	Terpenoids	萜类	-	-	17066-67-0	96630.5	130629	97011.1	1.2201e+08	6.86642e+07	7.06744e+07	1.2231	0.037975	0.139397	805.959	9.65456	up
XMW0009	GC-MS	C15H24	Naphthalene, 1,2,4a,5,8,8a-hexahydro-4,7-dimethyl-1-(1-methylethyl)-, [1S-(1.alpha.,4a.beta.,8a.alpha.)]-	Β-卡丁烯	Terpenoids	萜类	-	-	523-47-7	1.87991e+08	1.57283e+08	1.87602e+08	1.25662e+09	8.68466e+08	1.47068e+09	1.20507	0.0281892	0.131118	6.74785	2.75443	up
KMW0478	GC-MS	C15H24	cis-.beta.-Farnesene	（Z）-β-法呢烯	Terpenoids	萜类	-	-	28973-97-9	918217	1.42418e+06	878468	2.4377e+07	1.28257e+07	1.21814e+07	1.20194	0.060089	0.163177	15.3325	3.93852	up
KMW0596	GC-MS	C15H24	Alloaromadendrene	阿古玛烯	Terpenoids	萜类	-	-	25246-27-9	6.53984e+07	1.07604e+08	5.5889e+07	1.20878e+07	6.77057e+06	1.1943e+07	1.18227	0.0517645	0.156015	0.134567	-2.8936	down
XMW0975	GC-MS	C15H24	4-(1,5-dimethyl-1,4-hexadienyl)-1-methyl-Cyclohexene	4-（1,5-二甲基-1,4-己二烯基）-1-甲基-环己烯	Terpenoids	萜类	-	-	17627-44-0	3.11827e+07	2.59176e+07	3.17704e+07	4.05389e+08	2.10361e+08	4.21645e+08	1.20123	0.0430402	0.149327	11.6731	3.54511	up
WMW0003	GC-MS	C15H24	Eremophilene	佛术烯	Terpenoids	萜类	-	-	10219-75-7	74621.2	139939	91827.8	897394	1.15757e+06	839178	1.2073	0.0103365	0.120327	9.446	3.2397	up
XMW0742	GC-MS	C15H24	10,10-Dimethyl-2,6-dimethylenebicyclo[7.2.0]undecane	10,10-二甲基-2,6-二亚甲基双环[7.2.0]十一烷	Terpenoids	萜类	-	-	357414-37-0	2.75297e+06	3.62622e+06	2.66941e+06	1.12514e+08	6.21913e+07	7.55062e+07	1.21648	0.0332795	0.132454	27.6519	4.78931	up
D345	GC-MS	C14H20O	(3aR,6R,8aR)-7,7-Dimethyl-8-methylenehexahydro-1H-3a,6-methanoazulen-3(2H)-one	（3aR，6R，8aR）-7,7-二甲基-8-亚甲基六氢-1H-3a，6-甲磺腈-3（2H）-酮	Ester	酯	-	-	30557-76-7	252613	191259	235807	1.50753e+06	1.14363e+06	2.7895e+06	1.17929	0.0861142	0.184821	8.00476	3.00086	up
D119	GC-MS	C14H20O	2-Benzylidene-1-heptanol	2-苄叉基-1-庚醇	Alcohol	醇	-	-	101-85-9	633656	270553	509416	6.20166e+06	7.70144e+06	1.95278e+07	1.17738	0.126827	0.219139	23.6491	4.56371	up
XMW0552	GC-MS	C13H16O2	2,2'-Isopropylidenebis(5-methylfuran)	2,2'-异亚丙基双（5-甲基呋喃）	Heterocyclic compound	杂环化合物	-	-	59212-75-8	6.8493e+06	8.7472e+06	5.39997e+06	6.55395e+07	3.34233e+07	3.07596e+07	1.17003	0.0822876	0.18287	6.1783	2.62721	up
XMW1176	GC-MS	C13H16O2	Benzeneacetic Acid, .alpha.-cyclopentyl-	α-环戊基-苯乙酸	Acid	酸	-	-	3900-93-4	222932	78035.4	127559	2.00781e+06	2.56404e+06	7.07519e+06	1.16988	0.14498	0.232851	27.1793	4.76443	up
WMW0059	GC-MS	C13H16O2	E-2-Hexenyl benzoate	E-2-己烯基苯甲酸酯	Ester	酯	-	-	76841-70-8	71696	125842	51661.1	1.21103e+06	1.01424e+06	1.43995e+06	1.20094	0.00967382	0.120327	14.708	3.87853	up
XMW0861	GC-MS	C11H12N2O2	7-Methoxy-4-methyl-1,3-dihydro-2H-1,5-benzodiazepin-2-one	7-甲氧基-4-甲基-1,3-二氢-2H-1,5-苯并二氮杂-2-酮	Ketone	酮	-	-	64376-03-0	33723	11002	21403.2	247271	368165	876402	1.16357	0.132398	0.222731	22.5598	4.49568	up
D327	GC-MS	C15H22	(4R,4aR)-4,4a-Dimethyl-6-(prop-1-en-2-yl)-1,2,3,4,4a,7-hexahydronaphthalene	（4R，4aR）-4,4a-二甲基-6-（丙-1-烯-2-基）-1,2,3,4,4a，7-六氢萘	Terpenoids	萜类	-	-	28908-26-1	59213.5	47118	43809.7	145989	109828	193711	1.15379	0.0499049	0.156015	2.99403	1.58209	up
KMW0620	GC-MS	C15H22	Benzene, 1-(1,5-dimethyl-4-hexenyl)-4-methyl-	α-姜黄素	Terpenoids	萜类	-	-	644-30-4	285587	323275	248690	1.23441e+08	7.95687e+07	7.95624e+07	1.22345	0.0234079	0.130844	329.51	8.36418	up
XMW0227	GC-MS	C15H22	aR-Himachalene	aR-雪松烯	Terpenoids	萜类	-	-	19419-67-1	57694	43618.1	40947.2	67416	109315	159770	1.01617	0.13141	0.222662	2.3654	1.24209	up
XMW0992	GC-MS	C15H22	(2R,8R,8aS)-8,8a-Dimethyl-2-(prop-1-en-2-yl)-1,2,3,7,8,8a-hexahydronaphthalene	（2R，8R，8aS）-8,8a-二甲基-2-（丙-1-烯-2-基）-1,2,3,7,8,8a-六氢萘	Terpenoids	萜类	-	-	5090-61-9	725509	753237	606147	1.0699e+07	5.96677e+06	1.30108e+07	1.20311	0.047174	0.152921	14.2341	3.83128	up
XMW0262	GC-MS	C15H22	1,1,7,7a-Tetramethyl-1a,2,6,7,7a,7b-hexahydro-1H-cyclopropa[a]naphthalene	1,1,7,7a-四甲基-1a，2,6,7,7a，7b-六氢-1H-环丙烷[a]萘	Terpenoids	萜类	-	-	154098-14-3	234391	241979	171780	1.38051e+06	1.11328e+06	816143	1.19399	0.0301855	0.132208	5.10674	2.3524	up
XMW0386	GC-MS	C15H22	cis-Calamenene	顺式卡拉曼烯	Terpenoids	萜类	-	-	72937-55-4	123529	86422.8	98103.3	340471	465095	559130	1.18962	0.0278681	0.130964	4.43003	2.14732	up
XMW0987	GC-MS	C15H22	Eudesma-2,4,11-triene	（2R，4aS）-4a，8-二甲基-2-（丙-1-烯-2-基）-1,2,3,4,4a，5-六氢萘	Terpenoids	萜类	-	-	82462-31-5	20772.7	99782.9	12240.7	9	9	9	1.21026	0.253194	0.333443	0.000203319	-12.264	down
D310	GC-MS	C15H22	(8R,8aS)-8,8a-Dimethyl-2-(propan-2-ylidene)-1,2,3,7,8,8a-hexahydronaphthalene	（8R，8aS）-8,8a-二甲基-2-（丙烷-2-亚烷基）-1,2,3,7,8,8a-六氢萘	Terpenoids	萜类	-	-	27840-40-0	336484	276636	214505	429272	596042	740788	1.07208	0.058677	0.162558	2.13394	1.09352	up
KMW0704	GC-MS	C15H20	.alpha.-Calacorene	Α-二去氢菖蒲烯	Terpenoids	萜类	-	-	21391-99-1	14562.1	31900.6	14687.4	46800.1	59314	54780	1.0906	0.0123747	0.120616	2.63114	1.39569	up
XMW0136	GC-MS	C15H20	4-Isopropyl-6-methyl-1-methylene-1,2,3,4-tetrahydronaphthalene	4-异丙基-6-甲基-1-亚甲基-1,2,3,4-四氢萘	Terpenoids	萜类	-	-	50277-34-4	582602	816999	404907	1.66557e+06	3.0209e+06	2.24629e+06	1.14274	0.0393893	0.143415	3.84191	1.94182	up
NMW0366	GC-MS	C13H12O2	3-phenoxy-Benzenemethanol	3-苯氧基-苯甲醇	Alcohol	醇	-	-	13826-35-2	9	9	9	11587	9788	16607	1.22405	0.0250362	0.130844	1406.74	10.4581	up
XMW1163	GC-MS	C9H12O3S	Ethyl 2-hydroxybenzyl sulfone	2-羟基苄基砜-乙基	Phenol	酚	-	-	53380-27-1	583956	187292	296732	5.76163e+06	7.17424e+06	1.88641e+07	1.17328	0.13231	0.222731	29.7758	4.89607	up
XMW0155	GC-MS	C13H13NO	5-Phenyl-o-anisidine	5-苯基邻茴香胺	Amine	胺	-	-	39811-17-1	2679.38	1529.36	2140.54	13062.4	13120.3	39637.1	1.14843	0.154204	0.239858	10.3665	3.37386	up
KMW0598	GC-MS	C13H26O	Tridecanal	十三烷醛	Aldehyde	醛	-	-	10486-19-8	1.32997e+06	1.14491e+06	1.3535e+06	1.36488e+07	7.23838e+06	1.59076e+07	1.1941	0.0514661	0.156015	9.61107	3.2647	up
KMW0684	GC-MS	C12H22O2	.delta.-Dodecalactone	δ-十二内酯	Ester	酯	-	-	713-95-1	29647.2	16601	19050.6	113363	165640	351034	1.15632	0.120284	0.21505	9.64851	3.27031	up
XMW0394	GC-MS	C14H14O	Phenol, 4-(1-phenylethyl)-	4-（1-苯乙基）-苯酚	Phenol	酚	-	-	1988-89-2	8095.84	11603.7	6170.2	53995.5	61071.7	161949	1.15723	0.138057	0.228188	10.7081	3.42063	up
D153	GC-MS	C14H14O	Benzene, 1,1'-[oxybis(methylene)]bis-	1,1'-[氧双（亚甲基）]双-苯	Aromatics	芳烃	-	-	103-50-4	61522.7	49441.4	53041.5	465391	503757	794001	1.21033	0.0357108	0.135157	10.7505	3.42634	up
XMW1179	GC-MS	C8H16Cl2O	Butane, 1,1'-oxybis[4-chloro-	双（4-氯丁基）醚	Halogenated hydrocarbons	卤代烃	-	-	6334-96-9	9	9	9	39092.6	39765.7	57259.8	1.22481	0.0167539	0.123251	5041.41	12.2996	up
XMW1260	GC-MS	C13H24O	1-Cyclohexene-1-propanol, .alpha.,2,6,6-tetramethyl-	α，2,6,6-四甲基-1-环己烯-1-丙醇	Alcohol	醇	-	-	3293-47-8	244693	424138	240407	1.30924e+07	6.5617e+06	5.69951e+06	1.20396	0.0730585	0.174621	27.8844	4.80139	up
KMW0518	GC-MS	C12H20O2	2,6-Octadien-1-ol, 3,7-dimethyl-, acetate, (Z)-	乙酸橙花酯	Ester	酯	-	-	141-12-8	21478.7	21965.6	51780.4	258443	155734	322683	1.15798	0.0430606	0.149327	7.73811	2.95198	up
KMW0501	GC-MS	C12H20O2	Dihydrocarvyl acetate	乙酸二氢戊酯	Ester	酯	-	-	20777-49-5	2.13497e+06	2.13726e+06	1.22307e+06	97336	9	9	1.01366	0.0263175	0.130844	0.0177159	-5.81881	down
XMW0961	GC-MS	C12H20O2	Bornyl acetate	乙酸龙脑酯	Ester	酯	-	-	76-49-3	16875.8	16459.3	26235	299321	211661	429135	1.20422	0.0430159	0.149327	15.7817	3.98018	up
WMW0219	GC-MS	C12H20O2	Isobornyl acetate	乙酸异冰片酯	Ester	酯	-	-	125-12-2	19179.7	20293	30893.1	275192	167287	405989	1.18988	0.0636614	0.167065	12.058	3.59191	up
WMW0175	GC-MS	C12H20O2	.delta.-Terpineol, acetate	δ-松油醇，醋酸盐	Terpenoids	萜类	-	-	93836-50-1	1.45848e+06	519500	333494	82011.9	50593.7	75932	1.13651	0.181603	0.264966	0.0902185	-3.47043	down
WMW0016	GC-MS	C12H20O2	(-)-Bornyl acetate	（-）-乙酸龙脑酯	Terpenoids	萜类	-	-	5655-61-8	19179.7	20293	30893.1	276033	199138	407217	1.20018	0.0463738	0.152741	12.54	3.64847	up
XMW0803	GC-MS	C12H20O2	Iso-3-thujyl acetate	异-3-叔丁基乙酸酯	Ester	酯	-	-	62181-90-2	36210.4	51328.8	60139.7	399570	213014	401819	1.18264	0.0423228	0.149252	6.86897	2.78009	up
WMW0089	GC-MS	C13H22O	5,9-Undecadien-2-one, 6,10-dimethyl-	6,10-二甲基-5,9-十一碳烯-2-酮	Ketone	酮	-	-	689-67-8	1.00586e+06	2.27854e+06	1.43071e+06	6.70491e+07	3.58952e+07	3.07617e+07	1.20273	0.0628735	0.165797	28.3569	4.82563	up
KMW0563	GC-MS	C13H22O	5,9-Undecadien-2-one, 6,10-dimethyl-, (E)-	（E）-6,10-二甲基-5,9-十一碳烯-2-酮	Ketone	酮	-	-	3796-70-1	1.00586e+06	2.27854e+06	1.43071e+06	6.70491e+07	3.58947e+07	3.07635e+07	1.20273	0.0628695	0.165797	28.3572	4.82564	up
XMW0198	GC-MS	C13H22O	3-Buten-2-ol, 4-(2,6,6-trimethyl-2-cyclohexen-1-yl)-, (3E)-	（3E）-4-（2,6,6-三甲基-2-环己烯-1-基）-3-丁烯-2-醇	Alcohol	醇	-	-	25312-34-9	1.15639e+06	1.64223e+06	1.00838e+06	3.62216e+07	1.86919e+07	1.59465e+07	1.20165	0.0719732	0.173645	18.6131	4.21824	up
D393	GC-MS	C12H18O2	1,3-Cyclohexadiene-1-carboxylic acid, 2,6,6-trimethyl-, ethyl ester	1,3-环己二烯-1-羧酸，2,6,6-三甲基-乙酯	Ester	酯	-	-	35044-59-8	3.24736e+07	3.00677e+07	2.3374e+07	9	9	9	1.22548	0.0089154	0.117054	3.14263e-07	-21.6015	down
XMW0933	GC-MS	C12H18O2	Bicyclo[3.1.1]hept-2-en-6-ol, 2,7,7-trimethyl-, acetate, [1S-(1.alpha.,5.alpha.,6.beta.)]-	[1S-（1α，5α，6β）]-2,7,7-三甲基-乙酸酯-双环[3.1.1]庚-2-烯-6-醇	Ester	酯	-	-	50764-55-1	164628	239503	196643	66906.8	68252.2	96544	1.16068	0.0170484	0.124906	0.385674	-1.37455	down
D249	GC-MS	C11H14O3	Ethanol, 2-phenoxy-, propanoate	丙酸2-苯氧乙酯	Ester	酯	-	-	23495-12-7	335839	145802	288785	9	9	9	1.22435	0.046114	0.152741	3.50455e-05	-14.8004	down
D362	GC-MS	C10H10O4	3,4-Methylenedioxybenzyl acetate	3,4-亚甲基二氧苄基乙酸酯	Ester	酯	-	-	326-61-4	1.44696e+06	1.28791e+06	1.527e+06	5.89532e+06	8.1129e+06	8.008e+06	1.21344	0.0139154	0.120616	5.16587	2.36901	up
NMW0291	GC-MS	C13H20O	Phenol, 4-heptyl-	4-庚基-苯酚	Phenol	酚	-	-	1987-50-4	237058	86024.4	178377	2082300	2184964	6813101	1.16228	0.152153	0.237582	22.0962	4.46573	up
D425	GC-MS	C13H20O	3-Cyclohexene-1-carboxAldehyde, 4-(4-methyl-3-pentenyl)-	4-（4-甲基-3-戊烯基）-3-环己烯-1-甲醛	Aldehyde	醛	-	-	37677-14-8	148569	273615	130672	1.08083e+06	2.03877e+06	1.18981e+06	1.17885	0.050999	0.156015	7.79482	2.96252	up
XMW0858	GC-MS	C11H13FN2	6-fluoro-.beta.-methyl-1H-Indole-3-ethanAmine	6-氟-β-甲基-1H-吲哚-3-乙胺	Amine	胺	-	-	77590-52-4	9	9	3623.92	48005.4	23953.9	34264.6	1.03222	0.0357823	0.135157	29.1671	4.86627	up
XMW0813	GC-MS	C12H17NO	Pentanal O-benzyloxime	邻苄基肟戊醛	Nitrogen compounds	含氮化合物	-	-	72399-21-4	75225.3	71236.7	57463.4	2.09167e+06	1.62942e+06	2.19924e+06	1.22146	0.0082628	0.113588	29.0319	4.85957	up
XMW0097	GC-MS	C14H22	1,5-Cycloundecadiene, 8,8-dimethyl-9-methylene-	8,8-二甲基-9-亚甲基-1,5-环癸二烯	Hydrocarbons	烃类	-	-	62338-54-9	2.19664e+06	3.42242e+06	1.159e+06	5.54917e+08	3.47148e+08	3.64469e+08	1.21496	0.0242046	0.130844	186.858	7.5458	up
KMW0526	GC-MS	C13H18O	2-Buten-1-one, 1-(2,6,6-trimethyl-1,3-cyclohexadien-1-yl)-, (E)-	β-大马烯酮	Terpenoids	萜类	-	-	23726-93-4	14518.2	20840.5	77699.4	2.41571e+06	1.06718e+06	439570	1.14238	0.161128	0.248048	34.6942	5.11662	up
NMW0281	GC-MS	C12H14O2	3-Butylisobenzofuran-1(3H)-one	3-丁基异苯并呋喃-1（3H）-酮	Heterocyclic compound	杂环化合物	-	-	6066-49-5	17156.3	7611.03	17132.7	449430	351294	1.00583e+06	1.19374	0.101969	0.197875	43.1158	5.43015	up
XMW0971	GC-MS	C12H14O2	Benzyl angelate	苯甲酸苄酯	Ester	酯	-	-	37526-87-7	7.13565e+06	9.44203e+06	5.84502e+06	1.29203e+08	6.70332e+07	6.73355e+07	1.19865	0.0598717	0.16308	11.7547	3.55516	up
NMW0357	GC-MS	C11H10O3	7-Ethoxycoumarin	7-乙氧基香豆素	Heterocyclic compound	杂环化合物	-	-	31005-02-4	16622.7	5655.18	15125.6	40976.3	30512.3	97705.3	1.01669	0.166877	0.252781	4.52348	2.17743	up
XMW0940	GC-MS	C13H16O	Benzenemethanol, .alpha.-2-cyclohexen-1-yl-	α.-2-环己烯-1-基-苯甲醇	Alcohol	醇	-	-	5723-89-7	71057.2	60872.2	113771	722060	463853	1.47292e+06	1.16026	0.116778	0.211948	10.8214	3.43582	up
NMW0255	GC-MS	C11H8O3	Plumbagin	白花丹醌	Phenol	酚	-	-	481-42-5	14854.1	14332	21626.9	84530.3	74341.8	158147	1.17296	0.0771396	0.179399	6.23896	2.6413	up
KMW0629	GC-MS	C12H26O	1-Dodecanol	月桂醇	Alcohol	醇	-	-	112-53-8	207107	200132	144785	4.90739e+07	2.97848e+07	3.12562e+07	1.22178	0.0276221	0.130844	199.475	7.64006	up
XMW0242	GC-MS	C13H28	Undecane, 3,9-dimethyl-	3,9-二甲基-十一烷	Hydrocarbons	烃类	-	-	17301-31-4	606435	444241	460243	232910	125294	180982	1.1456	0.0099619	0.120327	0.35686	-1.48657	down
XMW1399	GC-MS	C13H28	Decane, 2,5,9-trimethyl-	2,5,9-三甲基-癸烷	Hydrocarbons	烃类	-	-	62108-22-9	53459.7	56057	72306	106622	100150	172238	1.07336	0.0958393	0.194386	2.0845	1.0597	up
KMW0674	GC-MS	C12H24O	trans-2-Dodecen-1-ol	（E）-2-十二烯-1-醇	Alcohol	醇	-	-	69064-37-5	46838.1	49385.2	38032.4	1.42578e+07	8.74337e+06	9.29993e+06	1.22283	0.0256965	0.130844	240.594	7.91046	up
XMW1401	GC-MS	C11H20O2	n-Valeric acid cis-3-hexenyl ester	顺-3-己烯基酯-正戊酸	Ester	酯	-	-	35852-46-1	9	9	9	32236	8337.17	15119.9	1.21831	0.120812	0.215565	2062.71	11.0103	up
NMW0209	GC-MS	C11H20O2	Undecylenic Acid	十一碳烯酸	Acid	酸	-	-	112-38-9	67089.5	93041.7	66890.6	4.9056e+07	2.97047e+07	3.12928e+07	1.2232	0.0275272	0.130844	484.771	8.92116	up
WMW0106	GC-MS	C11H20O2	6-Nonen-1-ol, acetate, (Z)-	顺-6-壬烯基乙酸酯	Ester	酯	-	-	76238-22-7	4.37448e+06	4.32527e+06	2.53164e+06	210368	9	9	1.00386	0.0248877	0.130844	0.018732	-5.73835	down
XMW1403	GC-MS	C11H20O2	cis-3-Hexenyl isovalerate	顺-3-异戊基异戊酸酯	Ester	酯	-	-	35154-45-1	9	9	9	33240	8986.52	19258.4	1.21882	0.100313	0.197257	2277.22	11.1531	up
KMW0637	GC-MS	C11H20O2	2H-Pyran-2-one, 6-hexyltetrahydro-	δ-十一内酯	Ester	酯	-	-	710-04-3	7065.41	7590.41	5849.27	42651.7	30903	75391.2	1.17695	0.0843553	0.183759	7.26386	2.86074	up
D380	GC-MS	C11H18O2	3(2H)-Furanone, 2-hexyl-5-methyl-	2-己基-5-甲基-3（2H）-呋喃酮	Ketone	酮	-	-	33922-66-6	6775.02	11780	7367.57	193745	104271	134817	1.20705	0.0350836	0.134562	16.6971	4.06153	up
XMW1158	GC-MS	C10H15NO2	Tricyclo[3.3.1.1(3,7)]decane, 2-nitro-	2-硝基-三环[3.3.1.1（3,7）]癸烷	Nitrogen compounds	含氮化合物	-	-	54564-31-7	9	9	9	62204.9	47600.2	153010	1.22124	0.117285	0.212645	9733.91	13.2488	up
NMW0215	GC-MS	C5H11NS3	N,N-Dimethyl-1,2,3-trithian-5-Amine	N，N-二甲基-1,2,3-三噻吩-5-胺	Amine	胺	-	-	31895-21-3	15603.4	9208.37	9348.63	91559.5	49455.1	84078.1	1.17817	0.0361534	0.135374	6.58928	2.72012	up
WMW0077	GC-MS	C13H24	1-Tridecyne	1-十三炔	Hydrocarbons	烃类	-	-	26186-02-7	9	9	9	667408	368476	701515	1.22435	0.0317853	0.132208	64348.1	15.9736	up
XMW0508	GC-MS	C10H12O3	2,5-Dihydroxy-4-isopropyl-2,4,6-cycloheptatrien-1-one	2,5-二羟基-4-异丙基-2,4,6-环庚三烯-1-酮	Ketone	酮	-	-	54755-56-5	176316	217045	89299.5	48058.4	65109.2	64433.3	1.0484	0.111218	0.207463	0.367963	-1.44237	down
XMW0280	GC-MS	C10H12O3	Carbonic acid, phenyl propyl ester	碳酸苯丙酯	Ester	酯	-	-	13183-16-9	86858.9	95436.4	145568	28909.1	14712.8	31092.3	1.14661	0.0359344	0.135157	0.227882	-2.13364	down
NMW0353	GC-MS	C9H9NO3	Hippuric Acid	N-苯甲酰甘氨酸	Acid	酸	-	-	495-69-2	49076	26770	16580	137694	138480	169383	1.13986	0.00118391	0.0701746	4.82069	2.26924	up
D170	GC-MS	C11H14O2	p-Tolyl isobutyrate	对甲苯基异丁酸酯	Ester	酯	-	-	103-93-5	15043.1	13579.5	19892.1	137782	98069.2	135164	1.21022	0.012497	0.120616	7.64749	2.93499	up
D145	GC-MS	C11H14O2	Propanoic acid, 2-methyl-, phenylmethyl ester	2-甲基丙酸苄酯	Ester	酯	-	-	103-28-6	206689	181480	242804	1.16859e+06	619579	1.09167e+06	1.174	0.0472679	0.152921	4.56412	2.19034	up
KMW0574	GC-MS	C11H12O2	2-Propenoic acid, 3-phenyl-, ethyl ester	肉桂酸乙酯	Ester	酯	-	-	103-36-6	1.93039e+06	3.03728e+06	1.55949e+06	315165	192526	304071	1.19103	0.0492291	0.154517	0.124367	-3.00732	down
NMW0272	GC-MS	C10H7NO2	Naphthalene, 2-nitro-	2-硝基-萘	Phenol	酚	-	-	581-89-5	6269.97	6287.66	4523.12	51505	53050	76182	1.21243	0.0202731	0.130844	10.5813	3.40345	up
D422	GC-MS	C11H24O	Undecanol-5	5-十一醇	Alcohol	醇	-	-	37493-70-2	35152	31035.5	93659.2	463457	177976	396951	1.10529	0.0699076	0.172206	6.49612	2.69958	up
D141	GC-MS	C10H20O2	Acetic acid, 2-ethylhexyl ester	乙酸2-乙基己酯	Ester	酯	-	-	103-09-3	8309.52	14943.5	19461.6	39173.9	67789.5	26606.2	1.03084	0.122713	0.217704	3.12703	1.64479	up
XMW0073	GC-MS	C10H20O2	3-Methylheptyl acetate	3-甲基庚基乙酸酯	Ester	酯	-	-	72218-58-7	31612.2	35574.2	38967.2	68560.2	63986.2	113533	1.10746	0.0956925	0.194308	2.31814	1.21297	up
D289	GC-MS	C10H20O2	n-Amyl isovalerate	戊基异戊酸酯	Ester	酯	-	-	25415-62-7	5250.28	4924.24	6688.84	92385	34329.4	64407.4	1.18534	0.0739883	0.17521	11.3336	3.50253	up
D240	GC-MS	C10H20O2	Propanoic acid, 2,2-dimethyl-, pentyl ester	丙酸2,2-二甲基戊酯	Ester	酯	-	-	2313-68-0	5964.28	5289.71	14250.4	759082	514596	939608	1.21027	0.0272979	0.130844	86.7808	6.4393	up
XMW1218	GC-MS	C10H20O2	2-Nonanone, 3-(hydroxymethyl)-	3-（羟甲基）-2-壬酮	Ketone	酮	-	-	67801-33-6	585.281	619.942	866.332	9262.85	8517.14	13330.3	1.21412	0.0227307	0.130844	15.0178	3.9086	up
XMW0282	GC-MS	C12H26	2,6-Dimethyldecane	2,6-二甲基癸烷	Hydrocarbons	烃类	-	-	13150-81-7	164493	158982	221319	52907.5	42344.1	34831.5	1.19533	0.0152509	0.121219	0.238775	-2.06628	down
w06	GC-MS	C12H26	Heptane, 2,2,4,6,6-pentamethyl-	2,2,4,6,6-五甲基-庚烷	Hydrocarbons	烃类	-	-	13475-82-6	221696	186797	247606	77416.7	46936.1	111425	1.10444	0.00550184	0.0994011	0.359364	-1.47648	down
KMW0297	GC-MS	C10H18O2	trans-Linalool oxide (furanoid)	（E）-芳樟醇氧化物	Heterocyclic compound	杂环化合物	-	-	34995-77-2	59351.5	59352.6	38584.1	530059	132788	330415	1.09151	0.135224	0.225716	6.31492	2.65876	up
NMW0127	GC-MS	C10H18O2	6-Octenoic Acid, 3,7-dimethyl-	3,7-二甲基-6-辛烯酸	Acid	酸	-	-	502-47-6	5.82003e+06	2.17472e+06	1.48343e+06	333502	126847	367742	1.12344	0.164912	0.251075	0.0873682	-3.51675	down
XMW0304	GC-MS	C10H18O2	Butanoic acid, 5-hexenyl ester	丁酸5-己烯基酯	Ester	酯	-	-	108058-75-9	457748	309218	302711	164202	91549.4	129315	1.13438	0.0315848	0.132208	0.359983	-1.474	down
XMW0368	GC-MS	C9H14O3	2-Propenoic acid, 2-methyl-, (tetrahydro-2-furanyl)methyl ester	甲基丙烯酸四氢糠基酯	Ester	酯	-	-	2455-24-5	408405	270418	228125	139237	67828.5	93802.4	1.1073	0.0511328	0.156015	0.331737	-1.59189	down
NMW0149	GC-MS	C10H16O2	Geranic acid	香叶酸	Terpenoids	萜类	-	-	459-80-3	9	9	9	37077.7	16943.6	44205.3	1.2217	0.0569295	0.160829	3638.02	11.8289	up
NMW0101	GC-MS	C10H16O2	Ascaridole	阿斯利多	Terpenoids	萜类	-	-	512-85-6	9	9	9	325151	132247	184581	1.22358	0.0654172	0.168955	23777	14.5373	up
NMW0087	GC-MS	C10H16O2	2-Oxabicyclo[2.2.2]octan-6-one, 1,3,3-trimethyl-	1,3,3-三甲基-2-氧杂双环[2.2.2]辛酮	Terpenoids	萜类	-	-	107598-08-3	9	9	9	1.26774e+06	1.71264e+06	3.35889e+06	1.22397	0.0798865	0.181737	234787	17.841	up
XMW0246	GC-MS	C10H16O2	OxiranecarboxAldehyde, 3-methyl-3-(4-methyl-3-pentenyl)-	3-甲基-3-（4-甲基-3-戊烯基）-环氧乙烷甲醛	Aldehyde	醛	-	-	16996-12-6	203200	269517	218948	9	9	24115.4	1.00688	0.00336777	0.0828103	0.0348917	-4.84097	down
WMW0208	GC-MS	C10H16O2	2H-Pyran-2-one, tetrahydro-6-(2-pentenyl)-, (Z)-	（Z）-四氢-6-（2-戊烯基）-2H-吡喃-2-酮	Ketone	酮	-	-	25524-95-2	254669	236302	345223	80093.3	70090.9	79659.5	1.20329	0.0257218	0.130844	0.274869	-1.86318	down
XMW1400	GC-MS	C6H14FO2P	n-Pentyl methylphosphonofluoridate	正戊基甲基氟膦酸酯	Ester	酯	-	-	13454-59-6	7905.41	7175.46	7468.42	1177.39	1932.87	803.794	1.17775	0.000268482	0.0300901	0.173578	-2.52635	down
XMW0424	GC-MS	C11H18O	2,6-Dimethyl-1-nonen-3-yn-5-ol	2,6-二甲基-1-壬烯基-5-醇	Alcohol	醇	-	-	19780-98-4	20202.1	16166.5	24865.7	159925	87322.9	167300	1.18467	0.0426984	0.149327	6.76986	2.75913	up
NMW0151	GC-MS	C10H14O2	Bicyclo[3.1.1]hept-2-ene-2-carboxylic acid, 6,6-dimethyl-	6,6-二甲基-双环[3.1.1]庚-2-烯-2-羧酸	Terpenoids	萜类	-	-	19250-17-0	137724	158925	119495	1.99367e+06	1.30041e+06	2.44853e+06	1.20963	0.0334468	0.132532	13.7996	3.78655	up
D113	GC-MS	C10H14O2	Benzene, (2,2-dimethoxyethyl)-	（2,2-二甲氧基乙基）-苯	Aromatics	芳烃	-	-	101-48-4	9	9	9	8887.4	6650.88	18184.9	1.22049	0.0862541	0.184821	1249.01	10.2866	up
NMW0211	GC-MS	C10H14O2	1-Cyclohexene-1-carboxylic acid, 4-(1-methylethenyl)-	4-（1-甲基乙烯基）-1-环己烯-1-羧酸	Terpenoids	萜类	-	-	7694-45-3	28462	52310.6	29868.9	1.09692e+07	1.50264e+07	1.85983e+07	1.22173	0.0213828	0.130844	403.049	8.65481	up
KMW0365	GC-MS	C10H14O2	2-((3,3-Dimethyloxiran-2-yl)methyl)-3-methylfuran	（环氧甲基丁基）-甲基呋喃	Heterocyclic compound	杂环化合物	-	-	92356-06-4	9	9	9	132289	108791	156695	1.22503	0.0107059	0.120616	14732.4	13.8467	up
D359	GC-MS	C10H16N2	Pyrazine, 2,3-dimethyl-5-(1-methylpropyl)-	2,3-二甲基-5-（1-甲基丙基）-吡嗪	Heterocyclic compound	杂环化合物	-	-	32263-00-6	9	9	9	259356	174393	354539	1.2242	0.0370482	0.1374	29195.9	14.8335	up
XMW1140	GC-MS	C10H12O2	2-methyl-5-propan-2-ylcyclohexa-2,5-diene-1,4-dione	2-甲基-5-丙-2-基环己-2,5-二烯-1,4-二酮	Ketone	酮	-	-	490-91-5	9.29655e+06	766494	6.69925e+06	57784.3	338189	57838.5	1.07353	0.163956	0.250469	0.0270734	-5.20698	down
KMW0601	GC-MS	C10H12O2	2-Butanone, 4-(4-hydroxyphenyl)-	覆盆子酮	Ketone	酮	-	-	5471-51-2	387453	1.33583e+06	318606	2.31287e+06	6.40153e+06	3.12453e+06	1.06615	0.112332	0.208516	5.79802	2.53556	up
XMW1406	GC-MS	C10H12O2	2'-Ethoxyacetophenone	2'-乙氧基苯乙酮	Ketone	酮	-	-	2142-67-8	340997	333555	227636	125247	43698.8	81545	1.10316	0.0112982	0.120616	0.277648	-1.84867	down
NMW0264	GC-MS	C9H8O3	2-Propenoic Acid, 3-(3-hydroxyphenyl)-	3-（3-羟苯基）-2-丙酸	Acid	酸	-	-	588-30-7	28171.5	26716.2	37077.3	492020	235130	724708	1.18465	0.08498	0.184449	15.7871	3.98067	up
XMW0786	GC-MS	C12H18	Benzene, 1,3,5-triethyl-	1,3,5-三乙基-苯	Aromatics	芳烃	-	-	102-25-0	22928.6	11031.7	22269.6	60379.9	38331.5	89357.6	1.05972	0.0884638	0.186376	3.34464	1.74185	up
XMW0793	GC-MS	C12H18	1,7-Octadiene, 2,7-dimethyl-3,6-bis(methylene)-	2,7-二甲基-3,6-双（亚甲基）-1,7-辛二烯	Hydrocarbons	烃类	-	-	16714-60-6	40263.9	58227.3	30076.3	560364	121480	671984	1.07826	0.135304	0.225716	10.5301	3.39645	up
XMW1303	GC-MS	C8H16O3	Pentanoic acid, 2-hydroxy-4-methyl-, ethyl ester	2-羟基-4-甲基戊酸乙酯	Ester	酯	-	-	10348-47-7	17821.2	14897.2	53148.3	4.11e+06	2.69849e+06	5.15759e+06	1.20727	0.0308452	0.132208	139.356	7.12264	up
XMW0718	GC-MS	C7H12O4	Butanedioic acid, methyl-, dimethyl ester	甲基丁二酸二甲酯	Ester	酯	-	-	1604-11-1	923.232	332.448	6665.27	505615	349610	617761	1.17291	0.0243594	0.130844	185.961	7.53885	up
NMW0086	GC-MS	C11H13N	Pargyline	矮牵牛	Amine	胺	-	-	555-57-7	9	9	9	1.26774e+06	1.71264e+06	3.38314e+06	1.22395	0.081102	0.182658	235686	17.8465	up
XMW1310	GC-MS	C9H18O2	Isobutyl isovalerate	异戊酸异丁酯	Ester	酯	-	-	589-59-3	22031.5	17637.4	27145.7	10318.1	5686.61	10923.4	1.09052	0.0213773	0.130844	0.403029	-1.31105	down
D270	GC-MS	C9H18O2	Propanoic acid, 2-methyl-, pentyl ester	丙酸2-甲基戊酯	Ester	酯	-	-	2445-72-9	3305.14	2350.04	17301.2	1.89542e+06	1.23985e+06	2.42547e+06	1.19662	0.0327949	0.132257	242.231	7.92024	up
D271	GC-MS	C9H18O2	Propanoic acid, hexyl ester	丙酸己酯	Ester	酯	-	-	2445-76-3	1.0091e+06	948750	1.8833e+06	237712	84354.5	149206	1.15842	0.0623716	0.165797	0.12269	-3.02691	down
D269	GC-MS	C9H18O2	Butanoic acid, 2-methyl-, 2-methylpropyl ester	丁酸2-甲基-2-甲基丙酯	Ester	酯	-	-	2445-67-2	11090.8	6770.59	25023.7	54057	32783.1	56226.2	1.03389	0.0263483	0.130844	3.33604	1.73814	up
D199	GC-MS	C8H14O3	Hexanoic acid, 3-oxo-, ethyl ester	己酸-3-氧代乙酯	Ester	酯	-	-	3249-68-1	24415.6	22064.7	33782.6	71423.9	49971.4	96889.1	1.10686	0.0684929	0.170994	2.71962	1.4434	up
XMW0449	GC-MS	C8H14O3	Butanoic acid, anhydride	丁酸酸酐	Others	其它类	-	-	106-31-0	4513.88	4945.07	9349.82	41830	13565.8	65646.1	1.04644	0.150511	0.236748	6.4354	2.68603	up
D255	GC-MS	C10H10N2	Quinoxaline, 2,3-dimethyl-	2,3-二甲基喹喔啉	Heterocyclic compound	杂环化合物	-	-	2379-55-7	3.00633e+07	6.62966e+06	2.50575e+07	9	9	9	1.22333	0.101844	0.197845	4.37244e-07	-21.1251	down
XMW0281	GC-MS	C11H24	Decane, 5-methyl-	5-甲基-癸烷	Hydrocarbons	烃类	-	-	13151-35-4	5964.28	6937.44	14250.4	747317	512137	932918	1.21295	0.0272494	0.130844	80.7442	6.33529	up
XMW0403	GC-MS	C11H24	Nonane, 2,5-dimethyl-	2,5-二甲基壬烷	Hydrocarbons	烃类	-	-	17302-27-1	133917	175723	209687	17907.5	6006.37	22128.7	1.16408	0.0152621	0.121219	0.0886581	-3.4956	down
KMW0392	GC-MS	C10H20O	Cyclohexanol, 5-methyl-2-(1-methylethyl)-, (1.alpha.,2.alpha.,5.alpha.)-	新异薄荷醇	Terpenoids	萜类	-	-	491-02-1	463874	341202	308504	164500	92615.8	132371	1.14546	0.022488	0.130844	0.349761	-1.51556	down
KMW0250	GC-MS	C10H20O	7-Octen-2-ol, 2,6-dimethyl-	6（10）-二氢月桂烯醇	Terpenoids	萜类	-	-	18479-58-8	923.232	332.448	6901.72	506447	350215	619296	1.17157	0.0244241	0.130844	180.935	7.49933	up
XMW1342	GC-MS	C12H12	Naphthalene, 1,4-dimethyl-	1,4-二甲基-萘	Aromatics	芳烃	-	-	571-58-4	672520	165168	624607	9	9	9	1.22167	0.0947077	0.192963	1.84641e-05	-15.7249	down
NMW0098	GC-MS	C8H13NO2	Arecoline	槟榔碱	Heterocyclic compound	杂环化合物	-	-	63-75-2	2945.24	3632.64	6982.46	892.595	428.77	1154.92	1.11358	0.0935752	0.191911	0.182612	-2.45314	down
D409	GC-MS	C10H18O	(S)-2,5-Dimethyl-3-vinylhex-4-en-2-ol	（S）-2,5-二甲基-3-乙烯基己基-4-烯-2-醇	Alcohol	醇	-	-	35671-15-9	390735	284173	473214	2.54455e+06	672032	1.6361e+06	1.032	0.148436	0.235487	4.22663	2.07951	up
D306	GC-MS	C10H18O	1,5-Heptadien-4-ol, 3,3,6-trimethyl-	3,3,6-三甲基-1,5-庚二烯-4-醇	Terpenoids	萜类	-	-	27644-04-8	16161	12989.7	14217.6	87866.8	23222.4	67635.2	1.02527	0.141585	0.230036	4.12108	2.04302	up
XMW0217	GC-MS	C10H18O	cis-7-Decen-1-al	Cis-7-癸烯醛	Aldehyde	醛	-	-	21661-97-2	9	9	9	283517	308565	630328	1.22387	0.0675772	0.170606	45274.5	15.4664	up
KMW0588	GC-MS	C10H18O	3-Cyclohexene-1-ethanol, .beta.,4-dimethyl-	2-（4-甲基环己-3-烯-1-基）丙-1-醇	Alcohol	醇	-	-	18479-68-0	31028.4	35215.6	56033.6	456356	250220	473733	1.19056	0.0376737	0.139145	9.6527	3.27093	up
KMW0385	GC-MS	C10H18O	2-methyl-5-(1-methylethenyl)-Cyclohexanol	二氢香芹醇	Terpenoids	萜类	-	-	619-01-2	91482.3	44781.4	98751	616246	210779	1.17337e+06	1.06124	0.168988	0.254475	8.51178	3.08946	up
D348	GC-MS	C10H18O	Cyclobutaneethanol, 1-methyl-2-(1-methylethenyl)-, cis-	格兰迪索尔	Terpenoids	萜类	-	-	30820-22-5	307234	216338	218434	108000	57184	86908.8	1.14234	0.0174746	0.126155	0.339746	-1.55747	down
XMW1074	GC-MS	C10H18O	1-Cyclopentene-1-methanol, 2-methyl-5-(1-methylethyl)-	2-甲基-5-（1-甲基乙基）-1-环戊烯-1-甲醇	Alcohol	醇	-	-	80113-82-2	100013	52282.3	100573	625125	218305	1.18372e+06	1.06242	0.168493	0.254331	8.01662	3.00299	up
XMW1227	GC-MS	C9H14O2	(E)-2-Methylbut-2-en-1-yl methacrylate	（E）-2-甲基丙烯酸-2-甲基丁-2-烯-1-基酯	Ester	酯	-	-	88142-95-4	17977	16428.8	29909.1	673705	180294	767411	1.16419	0.104132	0.199912	25.2105	4.65595	up
NMW0166	GC-MS	C12H10	Biphenyl	联苯	Aromatics	芳烃	-	-	92-52-4	791.975	1469.62	15016.1	122990	66768.7	22833.6	1.02634	0.150622	0.236748	12.3045	3.62111	up
XMW1131	GC-MS	C8H10O3	2,5-Furandione, 3-methyl-4-propyl-	3-甲基-4-丙基-2,5-呋喃二酮	Ketone	酮	-	-	16493-20-2	9	9	9	5880.35	1790.75	5006	1.21534	0.0770335	0.179399	469.522	8.87505	up
XMW1440	GC-MS	C8H10O3	2-methylprop-2-enoyl 2-methylprop-2-enoate	2-甲基丙-2-烯丙基2-甲基丙-2-烯酸酯	Ester	酯	-	-	760-93-0	30953.2	11039.7	19080	1.10865e+06	440067	965005	1.19374	0.0564716	0.160789	41.1594	5.36315	up
NMW0234	GC-MS	C7H6O4	Patulin	帕特林	Alcohol	醇	-	-	149-29-1	130234	261308	107833	918557	1.94615e+06	1.00841e+06	1.16062	0.072873	0.174409	7.75594	2.9553	up
XMW1448	GC-MS	C10H16O	3,6-Dimethyl-2,3,3a,4,5,7a-hexahydrobenzofuran	3,6-二甲基-2,3,3a，4,5,7a-六氢苯并呋喃	Heterocyclic compound	杂环化合物	-	-	70786-44-6	269025	216599	191110	9	9	9	1.22545	0.010181	0.120327	3.98975e-05	-14.6133	down
XMW0526	GC-MS	C10H16O	AcetAldehyde, (3,3-dimethylcyclohexylidene)-, (Z)-	（Z）-（3,3-二甲基环己叉基）-乙醛	Aldehyde	醛	-	-	26532-24-1	9	9	9	390553	243277	765700	1.22268	0.0954857	0.194107	51834.4	15.6616	up
NMW0046	GC-MS	C10H16O	Bicyclo[3.1.1]heptan-3-ol, 6,6-dimethyl-2-methylene-, [1S-(1.alpha.,3.alpha.,5.alpha.)]-	[1S-（1α，3α，5α）]-6,6-二甲基-2-亚甲基-双环[3.1.1]庚-3-醇	Terpenoids	萜类	-	-	547-61-5	31434	37152.1	59637.3	836918	551545	1.10075e+06	1.20429	0.0379395	0.139397	19.413	4.27895	up
WMW0221	GC-MS	C10H16O	Bicyclo[3.1.0]hexan-3-one, 4-methyl-1-(1-methylethyl)-	4-甲基-1-（1-甲基乙基）-双环[3.1.0]己-3-酮	Terpenoids	萜类	-	-	1125-12-8	41238.3	55725.4	53635.2	353417	165031	511103	1.14448	0.0991814	0.196639	6.83638	2.77323	up
XMW0189	GC-MS	C10H16O	3-Cyclohexene-1-acetAldehyde, .alpha.,4-dimethyl-	α，4-二甲基-3-环己烯-1-乙醛	Aldehyde	醛	-	-	29548-14-9	9	9	9	193437	122698	389659	1.22226	0.0984849	0.196423	26140.5	14.674	up
KMW0254	GC-MS	C10H16O	1,5-Heptadien-4-one, 3,3,6-trimethyl-	蒿酮	Terpenoids	萜类	-	-	546-49-6	34819.1	33294	40786.9	244789	163496	309202	1.19757	0.0402178	0.145254	6.58849	2.71995	up
WMW0159	GC-MS	C10H16O	(+)-(1R,4R,5R)-2-(10)-PINEN-4-OL	（+）-顺式-邻苯二酚	Terpenoids	萜类	-	-	13040-03-4	59902	62885	97917.6	220074	172672	270345	1.15034	0.0213943	0.130844	3.00443	1.58709	up
XMW0766	GC-MS	C10H16O	Cyclohexanone, 5-methyl-2-(1-methylethylidene)-	5-甲基-2-（1-甲基亚乙基）-环己酮	Terpenoids	萜类	-	-	15932-80-6	9	9	9	447319	526153	1.03685e+06	1.22398	0.0683346	0.170837	74456.3	16.1841	up
KMW0290	GC-MS	C10H16O	Hotrienol	丁烯醇	Alcohol	醇	-	-	20053-88-7	1.12214e+06	1.01058e+06	1.66883e+06	8.36406e+06	2.61006e+06	3.70901e+06	1.04818	0.174444	0.259635	3.86241	1.9495	up
XMW0720	GC-MS	C10H16O	cis-p-Mentha-2,8-dien-1-ol	顺式-p-薄荷（2,8-二烯-1-醇）	Terpenoids	萜类	-	-	3886-78-0	104719	80432	112370	1.03212e+07	5.81659e+06	1.32761e+07	1.21622	0.0464793	0.152741	98.8636	6.62737	up
XMW1133	GC-MS	C10H16O	5-Isopropyl-3,3-dimethyl-2-methylene-2,3-dihydrofuran	5-异丙基-3,3-二甲基-2-亚甲基-2,3-二氢呋喃	Heterocyclic compound	杂环化合物	-	-	81250-44-4	24761.7	10836.9	112479	442846	254722	470522	1.06292	0.0224855	0.130844	7.88836	2.97973	up
D329	GC-MS	C10H16O	Myroxide	肉豆蔻	Terpenoids	萜类	-	-	28977-57-3	20021.1	14256.4	38509.1	3.19882e+06	1.62998e+06	3.82614e+06	1.20883	0.0483548	0.153409	118.908	6.89371	up
XMW1147	GC-MS	C10H16O	Tricyclo[2.2.1.0(2,6)]heptane-3-methanol, 2,3-dimethyl-	2,3-二甲基-三环[2.2.1.0（2,6）]庚烷-3-甲醇	Terpenoids	萜类	-	-	29550-55-8	26085	43296.6	47286.6	514834	357722	512671	1.20741	0.0137203	0.120616	11.8732	3.56964	up
XMW0764	GC-MS	C10H16O	(S)-(-)-(4-Isopropenyl-1-cyclohexenyl)methanol	（S）-（-）-（4-异丙烯基-1-环己烯基）甲醇	Terpenoids	萜类	-	-	18457-55-1	1.75784e+06	639848	430461	14083.1	5268.56	16041.1	1.19092	0.152345	0.237582	0.0125145	-6.32026	down
NMW0236	GC-MS	C8H8O3	Benzeneacetic Acid, 4-hydroxy-	4-羟基-苯乙酸	Acid	酸	-	-	156-38-7	368885	1.29316e+06	307256	2.31189e+06	6.08072e+06	3.12453e+06	1.0722	0.0995297	0.196639	5.84834	2.54803	up
NMW0197	GC-MS	C8H8O3	Benzoic Acid, 4-methoxy-	4-甲氧基苯甲酸	Aromatics	芳烃	-	-	100-09-4	808888	1.26903e+06	647265	3.34504e+07	1.713e+07	1.4613e+07	1.20099	0.0717057	0.173581	23.9225	4.5803	up
D384	GC-MS	C4H8S3	TriSulfur compounds, methyl 2-propenyl	烯丙基三硫	Sulfur compounds	含硫化合物	-	-	34135-85-8	802.085	9	9	37966	19147.6	47495.6	1.11088	0.0532224	0.157647	127.559	6.99502	up
XMW0088	GC-MS	C6H5N3O2	Pyrolo[3,2-d]pyrimidin-2,4(1H,3H)-dione	吡咯并[3,2-d]嘧啶-2,4（1H，3H）-二酮	Ketone	酮	-	-	65996-50-1	22195	17969	23755.3	49450.5	31898.1	48473.4	1.10256	0.0509519	0.156015	2.03103	1.02221	up
NMW0041	GC-MS	C11H18	(E)-4,8-Dimethylnona-1,3,7-triene	（E）-4,8-​​二甲基壬基-1,3,7-三烯	Hydrocarbons	烃类	-	-	19945-61-0	802297	681315	863505	3.70749e+06	1.25354e+06	2.21206e+06	1.03587	0.152299	0.237582	3.05613	1.61171	up
XMW0690	GC-MS	C11H18	Cyclohexene, 2,4-dimethyl-1-(1-methylethenyl)-	2,4-二甲基-1-（1-甲基乙烯基）-环己烯	Hydrocarbons	烃类	-	-	56763-60-1	420686	359886	340254	9.53839e+06	2.99878e+06	4.36671e+06	1.1825	0.118352	0.212832	15.0816	3.91472	up
XMW0925	GC-MS	C10H14O	Camphenone, 6-	6-甲苯酮	Ketone	酮	-	-	55659-42-2	420434	359886	340251	9.53934e+06	2.99687e+06	4.36131e+06	1.18243	0.118557	0.212832	15.0794	3.9145	up
NMW0093	GC-MS	C10H14O	D-Verbenone	D-马鞭草酮	Terpenoids	萜类	-	-	18309-32-5	35480.7	32768.8	31682.8	121635	72935.2	267384	1.07134	0.174796	0.259635	4.62267	2.20873	up
XMW0968	GC-MS	C10H14O	4,7,7-Trimethylbicyclo[4.1.0]hept-3-en-2-one	4,7,7-三甲基双环[4.1.0] 庚-3-烯-2-酮	Ketone	酮	-	-	81800-50-2	3.15582e+06	1.14116e+06	721166	374509	142521	405221	1.01587	0.209655	0.294008	0.183783	-2.44392	down
XMW0721	GC-MS	C10H14O	Benzene, 1-methoxy-4-propyl-	1-甲氧基-4-丙基-苯	Aromatics	芳烃	-	-	104-45-0	248.485	9	9	18837.5	11945	21962.9	1.15355	0.0273722	0.130844	197.93	7.62885	up
KMW0473	GC-MS	C10H14O	4-Isopropylcyclohexa-1,3-dienecarbAldehyde	1,3-p-薄荷脑-7-醛	Aldehyde	醛	-	-	1197-15-5	27715.5	19378.1	32998.8	206633	120355	250013	1.17916	0.0476915	0.153142	7.20419	2.84884	up
NMW0043	GC-MS	C10H14O	Bicyclo[3.1.1]hept-2-en-6-one, 2,7,7-trimethyl-	2,7,7-三甲基-双环[3.1.1]庚酮	Terpenoids	萜类	-	-	473-06-3	4784.81	3643.13	7736.92	99868.8	183802	22426.2	1.10124	0.17371	0.259409	18.936	4.24306	up
XMW0615	GC-MS	C10H14O	Phenol, m-tert-butyl-	间叔丁基-苯酚	Phenol	酚	-	-	585-34-2	9	22010.8	9	216954	123256	225128	1.00114	0.0263043	0.130844	25.6636	4.68165	up
XMW0909	GC-MS	C10H14O	2,6,6-Trimethylbicyclo[3.2.0]hept-2-en-7-one	2,6,6-三甲基双环[3.2.0]庚-2-烯-7-酮	Terpenoids	萜类	-	-	4613-37-0	135592	110439	111098	3.69019e+06	1.1877e+06	1.67385e+06	1.18889	0.114474	0.21063	18.3456	4.19736	up
KMW0418	GC-MS	C10H14O	(1R)-(-)-Myrtenal	S-肉豆蔻醛	Aldehyde	醛	-	-	18486-69-6	68844.9	74532.8	117081	840729	492047	1.06214e+06	1.18636	0.0492389	0.154517	9.19497	3.20084	up
XMW1252	GC-MS	C10H14O	2(1H)-Naphthalenone, 3,4,5,6,7,8-hexahydro-	3,4,5,6,7,8-六氢-2（1H）-萘酮	Ketone	酮	-	-	13837-12-2	3.33818e+06	1.19032e+06	756244	58848.3	18712.9	64257.5	1.16652	0.164762	0.251075	0.0268355	-5.21971	down
NMW0153	GC-MS	C10H14O	Phenol, 4-butyl-	4-丁基-苯酚	Phenol	酚	-	-	1638-22-8	152736	185325	131903	2.81603e+06	1.93656e+06	3.55475e+06	1.21248	0.030472	0.132208	17.6765	4.14376	up
XMW1088	GC-MS	C9H10O2	4-Hydroxy-2-methylacetophenone	4-羟基-2-甲基苯乙酮	Ketone	酮	-	-	875-59-2	32455.1	35676.3	36064.5	490784	317674	602325	1.21122	0.0342808	0.133947	13.5397	3.75913	up
XMW0535	GC-MS	C9H10O2	p-Tolylacetic Acid	对甲苯甲酸	Aromatics	芳烃	-	-	622-47-9	120653	150897	101468	1.85475e+06	1.25929e+06	2.28371e+06	1.20974	0.02979	0.132208	14.4705	3.85504	up
NMW0039	GC-MS	C6H14S2	DiSulfur compounds, dipropyl	二硫化二丙基	Sulfur compounds	含硫化合物	-	-	629-19-6	2831.42	1896.02	6638.89	892506	449143	1.223e+06	1.20686	0.0629011	0.165797	225.636	7.81785	up
XMW0545	GC-MS	C10H15N	Benzenemethanamine, N-(1-methylethyl)-	N-（1-甲基乙基）-苯甲胺	Aromatics	芳烃	-	-	102-97-6	9	9	9	865836	612084	1.87271e+06	1.22311	0.101101	0.197257	124097	16.9211	up
NMW0156	GC-MS	C8H7NS	Benzene, (isothiocyanatomethyl)-	苯异硫氰酸酯	Heterocyclic compound	杂环化合物	-	-	622-78-6	153026	171507	127077	2.12205e+06	1.42001e+06	2.68719e+06	1.20926	0.0342226	0.133947	13.7934	3.78591	up
NMW0135	GC-MS	C8H7NS	Thiocyanic acid, phenylmethyl ester	苯甲基酯硫氰酸	Sulfur compounds	含硫化合物	-	-	3012-37-1	98803.1	93581.8	154372	32231.1	17163	38662.1	1.13265	0.0367744	0.13695	0.253942	-1.97743	down
XMW0941	GC-MS	C11H16	exo-7-(trans-1-Propenyl)bicyclo[4.2.0]oct-1(2)-ene	7-[（1E）-1-丙烯基]双环[4.2.0]辛-1-烯	Hydrocarbons	烃类	-	-	107983-42-6	57626.2	60533.9	116227	3.31126e+06	2.10099e+06	4.37937e+06	1.20854	0.0400259	0.144926	41.7754	5.38458	up
XMW0931	GC-MS	C10H12O	8,9-Dehydrothymol	8,9-脱氢百里酚	Phenol	酚	-	-	18612-99-2	40206.1	19911.2	40475.4	243135	152462	371831	1.15489	0.0714974	0.173581	7.62906	2.93151	up
XMW0735	GC-MS	C10H12O	Benzenemethanol, .alpha.-2-propenyl-	α-2-丙烯基-苯甲醇	Alcohol	醇	-	-	936-58-3	9	9	9	22297.1	20246.8	45861.1	1.22256	0.0697689	0.172206	3274.26	11.677	up
XMW0550	GC-MS	C7H8N4	N-Cyanomethyl-2-cyanimino-pyrrolidine	N-氰基甲基-2-氰基亚氨基吡咯烷	Heterocyclic compound	杂环化合物	-	-	134881-46-2	10809.1	12305.9	16475.9	108344	102193	241370	1.18631	0.0937885	0.191911	11.4144	3.51278	up
XMW1221	GC-MS	C6H12O2S	Acetic acid, (propylthio)-, methyl ester	乙酸（丙硫基）甲酯	Ester	酯	-	-	20600-65-1	573882	973846	969970	10986.3	5174.28	25408	1.19513	0.0246825	0.130844	0.0165105	-5.92047	down
NMW0070	GC-MS	C9H8O2	1,2-Propanedione, 1-phenyl-	1-苯基-1,2-丙二酮	Ketone	酮	-	-	579-07-7	23150.1	11661.1	27231.4	84748.4	59976.6	102759	1.12351	0.0263125	0.130844	3.98893	1.996	up
XMW0811	GC-MS	C9H9NO	Phenethyl isocyanate	异氰酸苯乙酯	Ester	酯	-	-	1943-82-4	9	9	9	859200	608813	1.87271e+06	1.22308	0.102261	0.198014	123730	16.9168	up
XMW1220	GC-MS	C6H10O4	Ethyl hydrogen succinate	琥珀酸氢乙酯	Ester	酯	-	-	1070-34-4	9	9	9	27029.9	15311.6	34174.8	1.22278	0.0434953	0.149909	2833.93	11.4686	up
KMW0560	GC-MS	C9H6O2	Coumarin	香豆素	Heterocyclic compound	杂环化合物	-	-	91-64-5	350249	416098	275890	3.81845e+06	1.96117e+06	1.99531e+06	1.18765	0.0666602	0.170355	7.45984	2.89915	up
GMW0113	GC-MS	C6H10S2	Diallyl disulphide	二烯丙基二硫化物	Sulfur compounds	含硫化合物	-	-	2179-57-9	26898.6	16744.5	25242.2	212518	97101.7	195785	1.17224	0.055118	0.160092	7.33691	2.87517	up
D387	GC-MS	C9H20O	1-Hexanol, 3,5,5-trimethyl-	3,5,5-三甲基-1-己醇	Alcohol	醇	-	-	3452-97-9	6635.12	5175.44	5271.07	219825	92810.7	190282	1.207	0.0518021	0.156015	29.442	4.8798	up
WMW0109	GC-MS	C8H16O2	Propanoic acid, 2-methyl-, 2-methylpropyl ester	异丁酸异丁酯	Ester	酯	-	-	97-85-8	279750	346926	474516	17759	7254.14	23347.3	1.19279	0.0248252	0.130844	0.0439165	-4.50909	down
KMW0204	GC-MS	C8H16O2	Acetic acid, hexyl ester	乙酸己酯	Ester	酯	-	-	142-92-7	100736	136035	160266	32183.8	17638.7	26852.1	1.18291	0.0202324	0.130844	0.193117	-2.37245	down
D137	GC-MS	C9H21N	N,N-dipropyl-1-PropanAmine	N，N-二丙基-1-丙胺	Amine	胺	-	-	102-69-2	11615.6	15740.7	21787.6	3267.82	1077.99	2102.56	1.15604	0.035543	0.135157	0.131214	-2.93001	down
KMW0208	GC-MS	C10H22	Decane	癸烷	Hydrocarbons	烃类	-	-	124-18-5	10952.7	6850.52	24732.2	53171.4	32616.7	55709.5	1.03724	0.0255604	0.130844	3.32659	1.73404	up
XMW1299	GC-MS	C10H22	Heptane, 3,3,5-trimethyl-	3,3,5-三甲基-庚烷	Hydrocarbons	烃类	-	-	7154-80-5	280019	347174	474233	17757.1	7254.14	23347.3	1.19283	0.0246653	0.130844	0.0439055	-4.50946	down
XMW0226	GC-MS	C9H18O	2-Heptanone, 4,6-dimethyl-	4,6-二甲基-2-庚酮	Ketone	酮	-	-	19549-80-5	12425.2	3816.6	5719.22	446873	177971	381272	1.19114	0.0556943	0.160468	45.8138	5.51771	up
WMW0100	GC-MS	C9H18O	3-Nonen-1-ol, (E)-	（E）-3-壬-1-醇	Alcohol	醇	-	-	10339-61-4	19073.9	7509.18	17810.2	549948	321845	722469	1.19665	0.0467857	0.152759	35.9122	5.1664	up
QWM0006	GC-MS	C9H18O	2-Nonanone	2-壬基酮	Ketone	酮	-	-	821-55-6	561.228	676.17	823.981	8928.21	8517.14	13339.3	1.21467	0.0247817	0.130844	14.934	3.90053	up
WMW0028	GC-MS	C9H18O	4-Heptanone, 2,6-dimethyl-	2,6-二甲基-4-庚酮	Ketone	酮	-	-	108-83-8	9320.31	6024.37	10196.5	2883.61	1679.23	2776.9	1.14835	0.0322806	0.132257	0.287369	-1.79902	down
XMW1085	GC-MS	C8H14O2	2-Butenoic acid, butyl ester	2-丁酸-丁酯	Ester	酯	-	-	7299-91-4	31867.2	12141.7	20101	1.10955e+06	440482	965039	1.19477	0.0565795	0.160789	39.2306	5.29391	up
NMW0016	GC-MS	C8H14O2	Acetic acid, cyclohexyl ester	醋酸环己酯	Ester	酯	-	-	622-45-7	116705	79573.6	128861	565873	178341	386042	1.02912	0.136423	0.22674	3.47621	1.79752	up
D417	GC-MS	C8H14O2	3-Hexen-1-ol, acetate, (E)-	反式-3-己烯基乙酸酯	Ester	酯	-	-	3681-82-1	12721.3	12820.1	15519.4	37449.5	30433.4	46350.3	1.18125	0.0298475	0.132208	2.78205	1.47615	up
D229	GC-MS	C8H14O2	Allyl isovalerate	异戊酸烯丙酯	Ester	酯	-	-	2835-39-4	391716	468783	626776	20015.6	8862.85	25983.4	1.20067	0.0199053	0.130844	0.0368875	-4.76073	down
D309	GC-MS	C8H14O2	Ethyl 2-hexenoate, trans-	2-己酸乙酯	Ester	酯	-	-	27829-72-7	9458.33	5323.08	6609.43	288630	118402	258730	1.20119	0.0547493	0.159537	31.1237	4.95994	up
XMW0362	GC-MS	C8H14O2	2H-Pyran-2-one, tetrahydro-4,6,6-trimethyl-	四氢-4,6,6-三甲基-2H-吡喃-2-酮	Ketone	酮	-	-	20628-36-8	9	9	1237.3	33126.7	17821.7	44576.6	1.09094	0.0554126	0.16017	76.0974	6.24978	up
XMW1117	GC-MS	C8H14O2	2-Propenoic acid, pentyl ester	2-丙酸戊酯	Ester	酯	-	-	2998-23-4	341422	443165	415776	86449.5	50831.8	121828	1.16353	0.00180019	0.0710719	0.215859	-2.21184	down
XMW0574	GC-MS	C8H14O2	4-Penten-1-ol, propanoate	4-戊烯-1-醇丙酸酯	Ester	酯	-	-	30563-30-5	268061	345143	332214	36332.2	32779.7	69969.2	1.18853	0.00228108	0.074624	0.147111	-2.76503	down
NMW0031	GC-MS	C8H15NO	Hygrine	古豆碱	Heterocyclic compound	杂环化合物	-	-	496-49-1	9245.87	6087.45	9431.74	530230	140270	606434	1.18421	0.101707	0.197794	51.5619	5.68823	up
NMW0097	GC-MS	C8H15NO	8-Azabicyclo[3.2.1]octan-3-ol, 8-methyl-, exo-	8-甲基-8-氮杂双环[3.2.1]-3-辛烷醇	Alcohol	醇	-	-	135-97-7	359003	424008	336290	14067.8	4321.4	21471.1	1.18367	0.00416117	0.0894361	0.0356119	-4.8115	down
NMW0091	GC-MS	C8H15NO	8-Azabicyclo[3.2.1]octan-3-ol, 8-methyl-, endo-	8-甲基-8-氮杂双环[3.2.1]辛烷-3-醇	Alcohol	醇	-	-	120-29-6	9	9	9	61599.2	62932.2	147633	1.22271	0.0859252	0.184821	10080.2	13.2992	up
KMW0251	GC-MS	C9H16O	5-Heptenal, 2,6-dimethyl-	二甲基庚醛	Aldehyde	醛	-	-	106-72-9	27689.4	20441.2	24438.5	625780	245546	561996	1.19687	0.0610446	0.164118	19.7511	4.30386	up
XMW0119	GC-MS	C9H16O	Cyclopentanone, 2-methyl-3-(1-methylethyl)-	2-甲基-3-（1-甲基乙基）-环戊酮	Ketone	酮	-	-	54549-81-4	1516.08	704.871	900.305	4811.65	3332.77	5405.28	1.14923	0.0188949	0.130722	4.34111	2.11806	up
XMW0486	GC-MS	C9H16O	Cyclohexanone, 2,2,6-trimethyl-	2,2,6-三甲基-环己酮	Ketone	酮	-	-	2408-37-9	112763	75792.1	112514	544307	169702	357321	1.03708	0.139139	0.228841	3.55842	1.83124	up
XMW0181	GC-MS	C9H16O	5-Hepten-2-one, 4,6-dimethyl-	4,6-二甲基-5-庚-2-酮	Ketone	酮	-	-	31162-48-8	8489.11	10128.8	9087.65	1614.17	894.166	2770.91	1.14936	0.000549869	0.0470007	0.190548	-2.39177	down
XMW0917	GC-MS	C9H16O	3-Nonen-5-one	3-壬烯-5-酮	Ketone	酮	-	-	82456-34-6	22548.7	22106.6	24182.1	98726.9	58307	109930	1.1717	0.0517827	0.156015	3.87818	1.95538	up
XMW0643	GC-MS	C7H12N2O	Butyramide, 2-cyano-2-ethyl-	2-氰基-2-乙基-丁酰胺	Amine	胺	-	-	18705-38-9	15105.4	19881.6	26538.4	199441	132856	197618	1.20317	0.0173116	0.126145	8.61295	3.10651	up
XMW0168	GC-MS	C8H12S	3-Butylthiophene	3-丁基噻吩	Heterocyclic compound	杂环化合物	-	-	34722-01-5	2994.24	1170.92	3991.55	25287.7	9896.19	49676.5	1.07983	0.15729	0.243603	10.4038	3.37903	up
XMW0528	GC-MS	C8H12S	Thiophene, 2-butyl-	2-丁基噻吩	Heterocyclic compound	杂环化合物	-	-	1455-20-5	154282	79143.5	111017	54285.5	26054.2	58989.2	1.01293	0.0697472	0.172206	0.404505	-1.30577	down
XMW1212	GC-MS	C7H8O3	2-Furancarboxylic acid, ethyl ester	2-呋喃甲酸乙酯	Ester	酯	-	-	614-99-3	41195.3	15353.8	29133.6	1.63557e+06	674804	1.49325e+06	1.19637	0.053611	0.157757	44.392	5.47223	up
w09	GC-MS	C10H18	2,6-Octadiene, 2,6-dimethyl-	2,6-二甲基-2,6-辛二烯	Hydrocarbons	烃类	-	-	2792-39-4	272334	356271	345479	61702.8	39983.1	87366.7	1.17897	0.00306002	0.0807754	0.194083	-2.36526	down
D374	GC-MS	C10H18	(-)-trans-Pinane	（-）-反戊烷	Terpenoids	萜类	-	-	33626-25-4	341295	442618	415579	86449.5	50812.9	121828	1.16347	0.00177628	0.0710719	0.216	-2.2109	down
XMW0034	GC-MS	C8H14N2	2-Dimethylamino-4-methyl-pent-4-enenitrile	2-二甲基氨基-4-甲基-戊-4-烯腈	Others	其它类	-	-	94492-10-1	12551.2	17117.7	19738.9	1657.91	3902.59	1558.76	1.16283	0.0132515	0.120616	0.144092	-2.79494	down
D364	GC-MS	C7H10N2O	2-Ethoxy-3-methylpyrazine	2-乙氧基-3-甲基吡嗪	Heterocyclic compound	杂环化合物	-	-	32737-14-7	59253.5	32243	265435	2.79506e+07	1.8254e+07	3.52042e+07	1.19505	0.0314526	0.132208	228.079	7.83339	up
D296	GC-MS	C7H10N2O	2-Ethyl-3-methoxypyrazine	2-乙基-3-甲氧基吡嗪	Heterocyclic compound	杂环化合物	-	-	25680-58-4	1074.15	659.155	2051.66	272349	175646	349760	1.21263	0.0343525	0.133947	210.769	7.71952	up
KMW0220	GC-MS	C10H16	3-Carene	δ-3-蒈烯	Terpenoids	萜类	-	-	13466-78-9	3.37473e+06	884553	1.8296e+07	7.31226e+07	4.43814e+07	7.50903e+07	1.03221	0.0141447	0.120616	8.53875	3.09403	up
KMW0259	GC-MS	C10H16	.gamma.-Terpinene	γ-萜类品烯	Terpenoids	萜类	-	-	99-85-4	708188	353620	3.77853e+06	3.24293e+08	2.27597e+08	3.94924e+08	1.18848	0.0229891	0.130844	195.609	7.61183	up
KMW0252	GC-MS	C10H16	1,3,7-Octatriene, 3,7-dimethyl-	α-柠檬烯	Terpenoids	萜类	-	-	502-99-8	2.93671e+06	721544	1.56811e+06	1.21336e+08	4.91859e+07	1.04612e+08	1.18785	0.0539001	0.158089	52.6433	5.71818	up
WMW0023	GC-MS	C10H16	(+)-alpha-Pinene	（+）-α-P烯	Terpenoids	萜类	-	-	7785-70-8	213296	98035	271321	54913.8	8783.88	32732.1	1.03733	0.0777191	0.179776	0.165502	-2.59508	down
KMW0198	GC-MS	C10H16	.alpha.-Phellandrene 1	（+）-α-芹烯1	Terpenoids	萜类	-	-	99-83-2	3.36866e+06	881630	1.828e+07	7.30914e+07	4.43653e+07	7.50602e+07	1.03215	0.0141403	0.120616	8.54481	3.09505	up
XMW0416	GC-MS	C10H16	1,3-Cyclohexadiene, 5-butyl-	5-丁基-1,3-环己二烯	Hydrocarbons	烃类	-	-	30168-57-1	713529	289604	1.14274e+06	8.69193e+06	1.95149e+06	5.30775e+06	1.04643	0.139636	0.22932	7.43343	2.89403	up
KMW0223	GC-MS	C10H16	1,3-Cyclohexadiene, 1-methyl-4-(1-methylethyl)-	α-萜类品烯	Terpenoids	萜类	-	-	99-86-5	207947	52224.1	1.10925e+06	4.66699e+06	2.73171e+06	4.9762e+06	1.03432	0.020257	0.130844	9.03657	3.17577	up
XMW0084	GC-MS	C10H16	2,4,6-Octatriene, 2,6-dimethyl-	2,6-二甲基-2,4,6-辛三烯	Terpenoids	萜类	-	-	673-84-7	56902.1	57185.6	96339.2	173022	160673	246906	1.12703	0.0276996	0.130844	2.75916	1.46423	up
D342	GC-MS	C10H16	2,4,6-Octatriene, 2,6-dimethyl-, (E,E)-	(E,E)-2,6-二甲基-2,4,6-辛三烯	Terpenoids	萜类	-	-	3016-19-1	66182.7	17374.3	41968.6	4.30655e+06	1.49834e+06	3.64336e+06	1.19056	0.0669424	0.170355	75.2695	6.23399	up
XMW0709	GC-MS	C10H16	Cyclohexane, 1-methylene-4-(1-methylethenyl)-	1-亚甲基-4-（1-甲基乙烯基）-环己烷	Terpenoids	萜类	-	-	499-97-8	3.36866e+06	881630	1.828e+07	7.30897e+07	4.43644e+07	7.50602e+07	1.03215	0.0141411	0.120616	8.54469	3.09503	up
XMW0771	GC-MS	C10H16	1,5-Cyclooctadiene, 3,4-dimethyl-	3,4-二甲基-1,5-环辛二烯	Terpenoids	萜类	-	-	21284-05-9	74669.6	23306.2	46289.5	2.83358e+06	1.11918e+06	2.41315e+06	1.19112	0.0565545	0.160789	44.1265	5.46357	up
KMW0235	GC-MS	C10H16	1,3,6-Octatriene, 3,7-dimethyl-, (Z)-	（Z）-BETA-辛二烯	Terpenoids	萜类	-	-	3338-55-4	2.08192e+06	746392	4.25535e+06	2.60142e+07	5.90303e+06	1.58885e+07	1.01117	0.140478	0.229651	6.74874	2.75462	up
D316	GC-MS	C10H16	Adamantane	金刚烷	Hydrocarbons	烃类	-	-	281-23-2	22472.9	15743.8	15925.1	1.26745e+06	402589	625629	1.20156	0.102236	0.198014	42.4011	5.40603	up
XMW0452	GC-MS	C10H16	2,4,6-Octatriene, 3,4-dimethyl-	3,4-二甲基-2,4,6-辛三烯	Hydrocarbons	烃类	-	-	57396-75-5	66784.9	47674.5	41634.9	3.25289e+06	1.0075e+06	1.4573e+06	1.19689	0.113942	0.210422	36.6298	5.19494	up
WMW0215	GC-MS	C10H16	.beta.-Ocimene	β-奥西米尼	Terpenoids	萜类	-	-	13877-91-3	2.07764e+06	745291	4.25011e+06	2.60142e+07	5.90303e+06	1.58885e+07	1.01141	0.140425	0.229651	6.75887	2.75678	up
XMW1064	GC-MS	C8H12N2	1,4-Methano-1H-Cyclopropa[d]pyridazine, 4,4a,5,5a-tetrahydro-6,6-dimethyl-, (1.alpha.,4.alpha.,4a.alpha.,5a.alpha.)-	（1α，4α，4aα，5a.α 。）-4,4a，5,5a-四氢-6,6-二甲基-1,4-甲基-1H-环丙[d]哒嗪	Heterocyclic compound	杂环化合物	-	-	109746-10-3	9	9	9	560888	363438	1.1313e+06	1.22289	0.0967747	0.195495	76134.4	16.2163	up
KMW0244	GC-MS	C8H12N2	Pyrazine, 2-methyl-5-(1-methylethyl)-	5-异丙基-2-甲基吡嗪	Heterocyclic compound	杂环化合物	-	-	13925-05-8	143347	70022.8	741167	8.86147e+07	5.86463e+07	1.12692e+08	1.1917	0.0312379	0.132208	272.334	8.08923	up
D414	GC-MS	C9H12O	Bicyclo[3.1.0]hex-3-en-2-one, 5-(1-methylethyl)-	脱氢沙棘酮	Ketone	酮	-	-	36262-12-1	413247	362566	330264	9.52927e+06	3.0024e+06	4.34754e+06	1.18291	0.118305	0.212832	15.2604	3.93172	up
WMW0081	GC-MS	C9H12O	cis-2-(2-Pentenyl)furan	顺-2-（2-戊烯基）呋喃	Heterocyclic compound	杂环化合物	-	-	70424-13-4	122188	34277.9	624875	2.6972e+06	1.57616e+06	2.77355e+06	1.04348	0.0184323	0.12824	9.019	3.17297	up
XMW0603	GC-MS	C9H12O	Benzene, 1-ethyl-4-methoxy-	1-乙基-4-甲氧基-苯	Aromatics	芳烃	-	-	1515-95-3	61576	49360.2	45779.7	3.27956e+06	1.00553e+06	1.47505e+06	1.19893	0.114526	0.21063	36.7553	5.19988	up
XMW1389	GC-MS	C9H12O	2,3-Dimethylanisole	2,3-二甲基苯甲醚	Ether	醚	-	-	2944-49-2	32552	8821.66	19792.7	2.08864e+06	726979	1.79749e+06	1.19144	0.067003	0.170355	75.4191	6.23686	up
D253	GC-MS	C7H8N2O	2-Acetyl-3-methylpyrazine	2-乙酰基-3-甲基吡嗪	Heterocyclic compound	杂环化合物	-	-	23787-80-6	2898.65	1853.85	1902.32	59690.7	63585.5	108822	1.21299	0.0412608	0.147243	34.8766	5.12419	up
NMW0025	GC-MS	C8H8O2	Acetic acid, phenyl ester	醋酸苯酯	Ester	酯	-	-	122-79-2	87195.7	45726.9	446691	4.97589e+07	3.30342e+07	6.23842e+07	1.19249	0.0296973	0.132208	250.473	7.96851	up
XMW0583	GC-MS	C8H8O2	Ethanone, 1-(3-hydroxyphenyl)-	1-（3-羟苯基）-乙酮	Ketone	酮	-	-	121-71-1	3.28553e+07	3.05678e+07	2.38565e+07	9	9	9	1.22548	0.00850512	0.115657	3.09351e-07	-21.6243	down
XMW0019	GC-MS	C8H8O2	Acetophenone, 4'-hydroxy-	4'-羟基-苯乙酮	Ketone	酮	-	-	99-93-4	1.57092e+06	2.47927e+06	1.42116e+06	6.73377e+07	3.43759e+07	3.33782e+07	1.20644	0.0605549	0.163782	24.6907	4.6259	up
XMW1318	GC-MS	C8H8O2	2-Methyl-3(2-furyl)acrolein	2-甲基-3（2-呋喃基）丙烯醛	Heterocyclic compound	杂环化合物	-	-	874-66-8	24102.8	17735	18965.7	1.26976e+06	408743	630639	1.20163	0.10095	0.197257	37.9771	5.24706	up
XMW1063	GC-MS	C4H4N6	4,4'-Bitriazolyl	4,4'-双氮唑基	Heterocyclic compound	杂环化合物	-	-	16227-15-9	86898.8	122388	122393	1.2745e+06	908902	1.24755e+06	1.21476	0.0120738	0.120616	10.3441	3.37074	up
NMW0157	GC-MS	C8H9NO	Acetamide, N-phenyl-	N-苯基-乙酰胺	Amine	胺	-	-	103-84-4	250882	281477	205511	4.04407e+06	2.65359e+06	5.07933e+06	1.21009	0.0344801	0.133947	15.9608	3.99646	up
XMW0206	GC-MS	C5H5N5	1H-Pyrazolo[3,4-d]pyrimidin-4-amine	1H-吡唑并[3,4-d]嘧啶-4-胺	Heterocyclic compound	杂环化合物	-	-	2380-63-4	39487.1	36664.3	69879.6	469952	270238	964539	1.15283	0.127754	0.220075	11.6738	3.5452	up
XMW0037	GC-MS	C10H14	Benzene, 1-ethyl-3,5-dimethyl-	1-乙基-3,5-二甲基-苯	Aromatics	芳烃	-	-	934-74-7	34571.9	17014.7	186967	2.16685e+07	1.43359e+07	2.76646e+07	1.19059	0.0316365	0.132208	266.896	8.06014	up
XMW0659	GC-MS	C10H14	Benzene, n-butyl-	正丁基苯	Aromatics	芳烃	-	-	104-51-8	1.25502e+06	301355	655312	5.53481e+07	2.15912e+07	4.70107e+07	1.18731	0.0571636	0.160829	56.0432	5.80847	up
XMW0366	GC-MS	C10H14	Benzene, 1,2,3,5-tetramethyl-	1,2,3,5-四甲基苯	Aromatics	芳烃	-	-	527-53-7	11402.7	8127.47	18952.8	253764	174256	246737	1.2037	0.0129961	0.120616	17.5339	4.13207	up
NMW0794	GC-MS	C10H14	Benzene, (1-methylpropyl)-	（1-甲基丙基）-苯	Aromatics	芳烃	-	-	135-98-8	83068.6	21148.7	422233	1.74362e+06	1.0279e+06	1.81471e+06	1.03427	0.0179352	0.126747	8.71162	3.12294	up
KMW0273	GC-MS	C10H14	Benzene, 1,2,4,5-tetramethyl-	杜罗尔	Aromatics	芳烃	-	-	95-93-2	11402.7	7715.62	15968.2	254142	174383	246737	1.20881	0.0133235	0.120616	19.2456	4.26646	up
XMW0719	GC-MS	C10H14	p-Mentha-1,5,8-triene	对薄荷脑1,5,8-三烯	Terpenoids	萜类	-	-	21195-59-5	125188	110407	116664	1.63482e+06	640305	1.07606e+06	1.18698	0.0738045	0.17521	9.5134	3.24996	up
KMW0431	GC-MS	C8H10N2	5H-5-Methyl-6,7-dihydrocyclopentapyrazine	二氢甲基环戊哌嗪	Heterocyclic compound	杂环化合物	-	-	23747-48-0	43888.6	24500.3	88331	1.29122e+07	7.49775e+06	1.70279e+07	1.20948	0.0459356	0.152693	238.884	7.90016	up
XMW0717	GC-MS	C9H10O	Ethanone, 1-(2-methylphenyl)-	1-（2-甲基苯基）-乙酮	Ketone	酮	-	-	577-16-2	70811	32875.8	32251.1	532003	574260	1.22043e+06	1.18287	0.0813264	0.182704	17.1159	4.09726	up
XMW0826	GC-MS	C7H6N2O	3-Methylisoxazolo[4,5-b]pyridine	3-甲基异唑并[4,5-b]吡啶	Heterocyclic compound	杂环化合物	-	-	83988-39-0	98445	108928	194470	1.08075e+06	927101	1.51732e+06	1.19332	0.0248583	0.130844	8.77251	3.13299	up
XMW0657	GC-MS	C8H7NO	Benzoxazole, 2-methyl-	2-甲基-苯并恶唑	Heterocyclic compound	杂环化合物	-	-	95-21-6	9	9	3094.88	567818	328011	764704	1.12505	0.0484584	0.153409	533.44	9.05918	up
XMW1193	GC-MS	C7H16O2	1,2-Hexanediol, 2-methyl-	2-甲基-1,2-己二醇	Alcohol	醇	-	-	56255-50-6	694.201	157.767	2231.88	203620	133282	257774	1.18021	0.0317817	0.132208	192.836	7.59123	up
NMW0010	GC-MS	C10H12	Dicyclopentadiene	双环戊二烯	Terpenoids	萜类	-	-	77-73-6	44367.6	13212.8	223940	905677	531375	929998	1.04068	0.0175703	0.126155	8.4081	3.07178	up
XMW0490	GC-MS	C10H12	1-Methyl-2-phenylcyclopropane	1-甲基-2-苯基环丙烷	Aromatics	芳烃	-	-	3145-76-4	8878.07	3781.24	41267.6	4.81941e+06	3.16237e+06	6.097e+06	1.19087	0.0314492	0.132208	261.072	8.0283	up
KMW0194	GC-MS	C8H18O	2-Octanol	2-辛醇	Alcohol	醇	-	-	123-96-6	1655.75	1411.76	4356.49	9259.26	5395.74	9696.53	1.04083	0.032831	0.132257	3.28011	1.71374	up
XMW1397	GC-MS	C10H10	2-Methylindene	2-甲基茚	Aromatics	芳烃	-	-	2177-47-1	9	9	1806.35	37255.9	26885.6	52634.8	1.0793	0.0353284	0.134924	64.0097	6.00022	up
KMW0137	GC-MS	C9H20	Nonane	壬烷	Hydrocarbons	烃类	-	-	111-84-2	386010	467160	654879	20697.2	7614.83	25489.8	1.19397	0.0254945	0.130844	0.0356764	-4.80889	down
XMW0642	GC-MS	C8H16O	Cyclohexanol, 3,5-dimethyl-	3,5-二甲基环己醇	Alcohol	醇	-	-	5441-52-1	272.301	947.369	1222.61	27379.6	13008.5	37287.1	1.16999	0.0704825	0.172836	31.8044	4.99115	up
XMW0578	GC-MS	C8H16O	Furan, 2-butyltetrahydro-	2-丁基四氢-呋喃	Heterocyclic compound	杂环化合物	-	-	1004-29-1	99080.3	103611	121478	64409.7	31527.4	58331.8	1.05789	0.0131682	0.120616	0.47589	-1.0713	down
WMW0127	GC-MS	C8H16O	3-Octen-1-ol, (Z)-	（Z）-3-辛烯-1-醇	Alcohol	醇	-	-	20125-84-2	37681.6	26605.1	150408	1.11577e+07	7.53469e+06	1.36893e+07	1.19901	0.0265913	0.130844	150.827	7.23675	up
XMW1237	GC-MS	C7H12O2	3-Pentenoic Acid, 2,2-dimethyl-	2,2-二甲基-3-戊烯酸	Acid	酸	-	-	16642-52-7	9516.82	10308.7	7498.54	342647	52217.5	168176	1.13475	0.168622	0.254331	20.6061	4.365	up
NMW0230	GC-MS	C5H8N2O2	5,6-Dihydro-5-methyluracil	5,6-二氢-5-甲基尿嘧啶	Heterocyclic compound	杂环化合物	-	-	696-04-8	67143.6	94454.7	49641.3	1.16894e+06	821375	889793	1.20955	0.0129786	0.120616	13.6343	3.76917	up
XMW0405	GC-MS	C7H13NO	4-Piperidinone, 1,3-dimethyl-	1,3-二甲基-4-哌啶酮	Ketone	酮	-	-	4629-80-5	1072.61	1418.64	2314.07	138652	95099.9	178680	1.21541	0.0301063	0.132208	85.8281	6.42338	up
KMW0184	GC-MS	C6H9NS	Thiazole, 2,4,5-trimethyl-	三甲基噻唑	Heterocyclic compound	杂环化合物	-	-	13623-11-5	856.092	1282.77	747.284	31304.1	5150.61	15819.8	1.13174	0.162345	0.248799	18.1122	4.17889	up
KMW0230	GC-MS	C8H14O	3-Octen-2-one	3-辛烯-2-酮	Ketone	酮	-	-	1669-44-9	45907.9	15641.2	93028.1	637271	152859	411051	1.03488	0.126793	0.219139	7.77075	2.95805	up
KMW0168	GC-MS	C8H14O	5-Methyl-(E)-2-hepten-4-one	5-甲基-2-庚-4-酮	Ketone	酮	-	-	102322-83-8	271684	353969	339953	59789.5	40830.9	92834.4	1.17396	0.00228653	0.074624	0.200345	-2.31944	down
KMW0170	GC-MS	C8H14O	1-Octen-3-one	辛烯酮	Ketone	酮	-	-	4312-99-6	342479	443165	435656	86598.9	50814.4	123014	1.16265	0.0022087	0.074624	0.213238	-2.22946	down
KMW0243	GC-MS	C8H14O	(E)-2-Octenal	E-2-辛烯醛	Aldehyde	醛	-	-	2548-87-0	44565.9	26963.8	226453	1.76929e+07	1.1561e+07	2.20172e+07	1.19109	0.0303793	0.132208	172.061	7.42677	up
KMW0274	GC-MS	C6H6O3	Maltol	麦芽酚	Heterocyclic compound	杂环化合物	-	-	118-71-8	46255.6	43492.1	71993.4	33593.7	12587.8	19378.6	1.01522	0.0504577	0.156015	0.40534	-1.3028	down
XMW1454	GC-MS	C6H6O3	Isomaltol	1-（3-羟基呋喃-2-基）乙酮	Ketone	酮	-	-	3420-59-5	22492.2	24066.8	19326.1	809905	117251	385210	1.12878	0.175513	0.260342	19.919	4.31607	up
KMW0221	GC-MS	C7H11NO	2-Acetyl-1,4,5,6-tetrahydropyridine	2-乙酰基1,4,5,6-四氢吡啶	Heterocyclic compound	杂环化合物	-	-	25343-57-1	21485	16731.6	43493.4	2.58797e+06	1.67508e+06	3.27103e+06	1.21115	0.0328974	0.132257	92.2051	6.52677	up
D321	GC-MS	C6H8N2O	Pyrazine, 2-methoxy-3-methyl-	2-甲氧基-3-甲基吡嗪	Heterocyclic compound	杂环化合物	-	-	2847-30-5	9	9	9	7517.67	6284.83	13654.5	1.22217	0.0568796	0.160829	1016.92	9.99	up
KMW0258	GC-MS	C7H8O2	2-methoxy-Phenol	愈创木酚	Phenol	酚	-	-	90-05-1	14320.9	12485.6	12630.7	201852	52928	222932	1.13396	0.112009	0.20832	12.1132	3.59851	up
KMW0183	GC-MS	C7H10N2	Pyrazine, 2-ethyl-5-methyl-	乙基甲基吡嗪	Heterocyclic compound	杂环化合物	-	-	13360-64-0	207383	52062.8	1.10895e+06	4.6634e+06	2.73261e+06	4.97177e+06	1.03425	0.020128	0.130844	9.03819	3.17603	up
KMW0190	GC-MS	C7H10N2	Pyrazine, trimethyl-	三甲基吡嗪	Heterocyclic compound	杂环化合物	-	-	14667-55-1	42713.9	15247.3	201243	756041	468313	780515	1.04906	0.0129493	0.120616	7.7347	2.95134	up
KMW0192	GC-MS	C8H10O	Benzene, 1-methoxy-2-methyl-	2-甲基苯甲醚	Aromatics	芳烃	-	-	578-58-5	23530.4	7222.12	114957	493110	292138	535694	1.05114	0.0210623	0.130844	9.06558	3.1804	up
NMW0022	GC-MS	C8H10O	Benzenemethanol, .alpha.-methyl-	α-甲基-苯甲醇	Alcohol	醇	-	-	98-85-1	254932	126381	1.34774e+06	1.34847e+08	8.92237e+07	1.68985e+08	1.18958	0.0299402	0.132208	227.324	7.82861	up
KMW0703	GC-MS	C8H10O	Phenol, 4-ethyl-	对氢乙苯	Aromatics	芳烃	-	-	123-07-9	16039.4	14381.2	27711.8	180177	101743	253178	1.17086	0.0667294	0.170355	9.20483	3.20239	up
KMW0284	GC-MS	C8H10O	Phenylethyl Alcohol	2-苯乙醇	Alcohol	醇	-	-	60-12-8	123772	85303.6	94254.8	1.63485e+06	641579	1.07852e+06	1.18675	0.0711613	0.173256	11.0604	3.46733	up
XMW3734	GC-MS	C7H6O2	2-hydroxy-BenzAldehyde	2-羟基苯甲醛	Aldehyde	醛	-	-	90-02-8	37870.8	9517.53	20839	1.78655e+06	654851	1.49409e+06	1.18734	0.0626937	0.165797	57.6821	5.85005	up
NMW0044	GC-MS	C8H11N	BenzenAmine, N-ethyl-	N-乙基-苯胺	Amine	胺	-	-	103-69-5	2614.55	2846.9	1601.39	15620.3	24267	4077.55	1.0085	0.169609	0.255195	6.22481	2.63803	up
XMW1385	GC-MS	C6H7N3	3-Imidazol-1-ylpropanenitrile	3-咪唑-1-基丙腈	Heterocyclic compound	杂环化合物	-	-	23996-53-4	141889	102440	82763.4	499429	183648	845330	1.0058	0.170074	0.255467	4.67271	2.22426	up
D392	GC-MS	C7H7NO	Ethanone, 1-(3-pyridinyl)-	1-（3-吡啶基）-乙酮	Ketone	酮	-	-	350-03-8	50412.1	43951.2	47978.6	231197	87972	150934	1.09116	0.118506	0.212832	3.30263	1.72362	up
XMW0711	GC-MS	C7H7NO	Formamide, N-phenyl-	N-苯基-甲酰胺	Aromatics	芳烃	-	-	103-70-8	3873.83	4589.6	3314.57	111119	78187.3	220218	1.2041	0.0907487	0.189192	34.7702	5.11978	up
NMW0012	GC-MS	C9H12	Benzene, 1,2,3-trimethyl-	1,2,3-三甲基苯	Aromatics	芳烃	-	-	526-73-8	11879	11504.1	20050.3	83543.3	41113.7	100275	1.13416	0.0718499	0.173581	5.17877	2.37261	up
KMW0169	GC-MS	C5H12OS	3-Mercapto-3-methylbutanol	巯基甲基丁醇	Sulfur compounds	含硫化合物	-	-	34300-94-2	243723	325967	326876	40347.1	32517.3	75049	1.17798	0.00457386	0.0906345	0.164978	-2.59966	down
KMW0233	GC-MS	C8H8O	Acetophenone	苯乙酮	Ketone	酮	-	-	98-86-2	143434	69257.3	769789	8.59956e+07	5.70502e+07	1.08164e+08	1.19006	0.0300411	0.132208	255.689	7.99825	up
KMW0212	GC-MS	C8H8O	BenzeneacetAldehyde	苯乙醛	Aldehyde	醛	-	-	122-78-1	1.2793e+06	313912	678379	5.53481e+07	2.16038e+07	4.70107e+07	1.1875	0.0571601	0.160829	54.5707	5.77006	up
XMW0015	GC-MS	C8H8O	BenzAldehyde, 4-methyl-	4-甲基-苯甲醛	Aldehyde	醛	-	-	104-87-0	11446.2	7955.51	8514.29	44731.6	27992.2	58061.2	1.16408	0.0566928	0.160789	4.68494	2.22803	up
NMW0023	GC-MS	C8H8O	BenzAldehyde, 2-methyl-	2-甲基-苯甲醛	Aldehyde	醛	-	-	529-20-4	358008	179950	1.85037e+06	1.79632e+08	1.20424e+08	2.2275e+08	1.19016	0.027979	0.130964	218.901	7.77413	up
NMW0774	GC-MS	C6H14O2	Ethanol, 2-butoxy-	2-丁氧基乙醇	Alcohol	醇	-	-	111-76-2	388587	446655	625136	20354.4	8655.42	25744.3	1.19933	0.021853	0.130844	0.0374931	-4.73723	down
NMW0011	GC-MS	C8H6O	Benzofuran	苯并呋喃	Heterocyclic compound	杂环化合物	-	-	271-89-6	3196.03	1051.54	13874.4	53877.2	31005.2	55907.6	1.04566	0.0204827	0.130844	7.76901	2.95773	up
KMW0159	GC-MS	C7H16O	1-Heptanol	1-庚醇	Alcohol	醇	-	-	111-70-6	295056	395063	367260	45418.6	37154.4	88863.6	1.17642	0.00290147	0.0789111	0.162134	-2.62474	down
XMW0310	GC-MS	C6H12O2	2H-Pyran-2-methanol, tetrahydro-	四氢-2H-吡喃-2-甲醇	Heterocyclic compound	杂环化合物	-	-	100-72-1	35000.4	28921.7	36223	9660.51	7099.71	13381.6	1.17042	0.001556	0.0710719	0.300982	-1.73225	down
KMW0167	GC-MS	C5H8OS	3(2H)-Thiophenone, dihydro-2-methyl-	甲基二氢噻吩酮	Heterocyclic compound	杂环化合物	-	-	13679-85-1	1617.75	727.99	2035.95	6291.49	3971.71	6635.52	1.09356	0.0230769	0.130844	3.85667	1.94736	up
D372	GC-MS	C7H14O	2-Hepten-1-ol, (E)-	（E）-2-庚-1-醇	Alcohol	醇	-	-	33467-76-4	268070	345156	332214	36332.2	32779.7	69116.7	1.18975	0.00237498	0.074791	0.146206	-2.77393	down
WMW0103	GC-MS	C7H14O	2-Cyclopentylethanol	2-环戊基乙醇	Alcohol	醇	-	-	766-00-7	296622	92659.9	1.52316e+06	6.08321e+06	3.65505e+06	6.2155e+06	1.04294	0.0150084	0.121219	8.34209	3.06041	up
KMW0122	GC-MS	C7H14O	Heptanal	庚醛	Aldehyde	醛	-	-	111-71-7	902484	1.18098e+06	1.57087e+06	44702.8	13561.8	71767.8	1.17658	0.025429	0.130844	0.035583	-4.81267	down
D350	GC-MS	C6H10O2	2-Pentenoic Acid, 2-methyl-	2-甲基-2-戊烯酸	Acid	酸	-	-	3142-72-1	244362	323513	320699	39911	31063.1	71872.8	1.18052	0.00385262	0.0894361	0.16076	-2.63702	down
w43	GC-MS	C6H10O2	2-Oxepanone	2-氧戊酮	Ketone	酮	-	-	502-44-3	7155.25	6464.61	21105.6	1.6491e+06	1.0509e+06	2.06466e+06	1.2081	0.0330762	0.132257	137.21	7.10024	up
XMW1203	GC-MS	C5H6O3	2,5-Furandione, dihydro-3-methyl-	二氢-3-甲基-2,5-呋喃二酮	Ketone	酮	-	-	4100-80-5	6819.9	6352.95	21065.4	1.64837e+06	1.04876e+06	2.06788e+06	1.20758	0.0333851	0.132532	139.172	7.12073	up
D378	GC-MS	C5H7NS	1-Butene, 4-isothiocyanato-	4-异硫氰酸根丁-1-烯	Sulfur compounds	含硫化合物	-	-	3386-97-8	48117.5	46627.9	57977.7	13482.1	9820.35	22813.6	1.13771	0.00256091	0.0764643	0.301959	-1.72758	down
XMW0765	GC-MS	C7H12O	4-Heptenal	顺-4-庚烯醛	Aldehyde	醛	-	-	62238-34-0	9	9	9	62762.4	54179.6	85135.3	1.22474	0.0182566	0.127665	7484.34	12.8697	up
KMW0123	GC-MS	C7H12O	4-Heptenal, (Z)-	4庚醛	Aldehyde	醛	-	-	6728-31-0	9	9	9	11285.1	10463.5	20110.2	1.22318	0.0457008	0.152195	1550.33	10.5984	up
D373	GC-MS	C7H12O	2,4-Heptadien-1-ol, (E,E)-	（E，E）-2,4-庚二烯-1-醇	Alcohol	醇	-	-	33467-79-7	503792	152833	2.58054e+06	1.0298e+07	6.13878e+06	1.04745e+07	1.04066	0.0154571	0.121231	8.31323	3.05541	up
XMW1118	GC-MS	C7H12O	CyclohexanecarboxAldehyde	环己烷甲醛	Aldehyde	醛	-	-	2043-61-0	344449	423368	436715	85613.6	51364.9	123588	1.1639	0.00135957	0.0701746	0.216322	-2.20875	down
XMW0276	GC-MS	C7H12O	4-Hexen-3-one, 5-methyl-	5-甲基-4-己烯-3-酮	Ketone	酮	-	-	13905-10-7	27950.1	25301.6	44276.3	376405	168877	302516	1.18036	0.0529637	0.157647	8.69287	3.11983	up
KMW0539	GC-MS	C6H8O2	2(5H)-Furanone, 5-ethyl-	乙基呋喃酮	Heterocyclic compound	杂环化合物	-	-	2407-43-4	585189	825561	786165	41736.9	55751.3	106381	1.1909	0.00872924	0.117054	0.0927978	-3.42977	down
GMW0039	GC-MS	C5H4O3	2-Furancarboxylic acid	2-呋喃甲酸	Heterocyclic compound	杂环化合物	-	-	88-14-2	7846.18	7122.76	4894.32	66346.9	16357.7	39093.6	1.08589	0.142536	0.230216	6.13184	2.61632	up
KMW0136	GC-MS	C6H9NO	2-Acetyl-1-pyrroline	乙酰吡咯啉	Heterocyclic compound	杂环化合物	-	-	85213-22-5	7572.09	13225.8	13427.7	38983.2	21195.6	78326.3	1.02451	0.174141	0.25962	4.04682	2.01679	up
NMW0036	GC-MS	C6H9NO	1-ethenyl-2-Pyrrolidinone	1-乙烯基-2-吡咯烷酮	Heterocyclic compound	杂环化合物	-	-	88-12-0	45204.1	35806.7	34263	24287.8	18518.2	11990.6	1.06344	0.0150329	0.121219	0.47536	-1.07291	down
XMW0884	GC-MS	C7H10O	5-Hexenal, 4-methylene-	4-亚甲基-5-己烯	Hydrocarbons	烃类	-	-	17844-21-2	13004.7	13371.8	22904.8	51748.4	40548.9	81018.5	1.12164	0.0669036	0.170355	3.51687	1.81429	up
KMW0240	GC-MS	C6H7NO	Ethanone, 1-(1H-pyrrol-2-yl)-	2-乙酰基吡咯	Heterocyclic compound	杂环化合物	-	-	1072-83-9	86366.6	45494	445850	4.97506e+07	3.30286e+07	6.23758e+07	1.19244	0.0296997	0.132208	251.259	7.97303	up
NMW0021	GC-MS	C6H8N2	2-PyridinemethanAmine	2-吡啶甲胺	Amine	胺	-	-	3731-51-9	407071	119490	224360	1.67141e+07	6.5259e+06	1.41678e+07	1.1912	0.0573114	0.160972	49.8159	5.63853	up
KMW0382	GC-MS	C7H8O	Phenol, 2-methyl-	邻甲酚	Aromatics	芳烃	-	-	95-48-7	41489.9	25607.6	27352.6	1.06687e+06	423838	898042	1.199	0.0578039	0.161617	25.2911	4.66056	up
KMW0323	GC-MS	C7H8O	Benzyl Alcohol	苯甲醇	Alcohol	醇	-	-	100-51-6	683843	271967	1.12499e+06	8.40217e+06	1.83461e+06	5.11151e+06	1.03863	0.142684	0.230216	7.37617	2.88287	up
NMW0013	GC-MS	C7H9N	Benzylamine	苄胺	Aromatics	芳烃	-	-	100-46-9	4295.69	4307.88	6414.39	30040.4	14059.2	35290.2	1.14005	0.0765586	0.178936	5.28632	2.40226	up
XMW0114	GC-MS	C6H5NO	Benzene, nitroso-	亚硝基苯	Aromatics	芳烃	-	-	586-96-9	431481	118612	2.27561e+06	9.27261e+06	5.54288e+06	9.56435e+06	1.0369	0.015959	0.121383	8.6279	3.10901	up
XMW0441	GC-MS	C2H2ClN3	1H-1,2,4-Triazole, 3-chloro-	3-氯-1,2,4-三氮唑	Halogenated hydrocarbons	卤代烃	-	-	6818-99-1	9	9	9	8572.12	3645.3	6797.65	1.22119	0.048102	0.15322	704.262	9.45997	up
XMW0892	GC-MS	C3H6N2O2	Propanediamide	丙二酰胺	Amine	胺	-	-	108-13-4	2607.05	2755.55	3845.68	16990.9	12041.4	25912.3	1.17633	0.0628554	0.165797	5.96688	2.57698	up
XMW1116	GC-MS	C6H12O	4-Hexen-1-ol, (E)-	（E）-4-己烯-1-醇	Alcohol	醇	-	-	928-92-7	9	9	9	25929.7	10090.2	52752.5	1.21558	0.140706	0.229816	3287.87	11.6829	up
KMW0098	GC-MS	C6H12O	3-Hexen-1-ol, (Z)-	（Z）-3-己烯醇	Alcohol	醇	-	-	928-96-1	9634.38	3743.2	13097.3	338899	55314.2	369170	1.11248	0.133169	0.22361	28.8342	4.84971	up
NMW0790	GC-MS	C5H8O2	2H-Pyran-2-one, tetrahydro-	四氢-2H-吡喃-2-酮	Ketone	酮	-	-	542-28-9	8799.47	5622.91	9948.99	4096.06	2292.11	4544.59	1.02145	0.0539929	0.158103	0.44859	-1.15653	down
XMW0710	GC-MS	CH4N6	1H-Tetrazole-1,5-diAmine	1H-四唑-1,5-二胺	Amine	胺	-	-	2165-21-1	6.93656e+06	5.76698e+06	6.7088e+06	8.41214e+07	4.18958e+07	1.06979e+08	1.19015	0.0647552	0.167486	12.0025	3.58526	up
XMW1120	GC-MS	C4H5NS	Thiocyanic acid, 2-propenyl ester	硫氰酸烯丙酯	Ester	酯	-	-	764-49-8	282682	365844	489877	15860.3	5059.05	23955.7	1.17852	0.0254031	0.130844	0.0394193	-4.66495	down
XMW0444	GC-MS	C2H3N5	1,2,4,5-Tetrazin-3-Amine	1,2,4,5-替他嗪-3-胺	Amine	胺	-	-	79329-74-1	65243.6	90998.6	98533.1	8087.94	8784.26	20287.1	1.16771	0.0104574	0.120327	0.145851	-2.77743	down
KMW0129	GC-MS	C6H8O	2,4-Hexadienal, (E,E)-	2,4-己二醛	Aldehyde	醛	-	-	142-83-6	339047	440564	584985	18720.9	5631	24070.9	1.18357	0.0248791	0.130844	0.0354851	-4.81664	down
XMW1430	GC-MS	C5H4O2	3-FurAldehyde	3-甲醛	Aldehyde	醛	-	-	498-60-2	55206.5	73142.6	47046.6	9673.67	9314.3	12417.4	1.20554	0.0233361	0.130844	0.179054	-2.48153	down
KMW0060	GC-MS	C7H8	Toluene	甲苯	Aromatics	芳烃	-	-	108-88-3	22991.4	18780.8	25164	182032	69240.4	182202	1.14485	0.0828126	0.18287	6.47593	2.69509	up
XMW0076	GC-MS	C5H4N2	1H-Pyrrole-3-carbonitrile	1H-吡咯-3-腈	Heterocyclic compound	杂环化合物	-	-	7126-38-7	526937	166472	910839	7.38685e+06	1.6355e+06	4.48656e+06	1.03993	0.137158	0.22754	8.42071	3.07394	up
XMW0655	GC-MS	C4H8O2	2-Butene-1,4-diol, (Z)-	（Z）-2-丁烯-1,4-二醇	Alcohol	醇	-	-	6117-80-2	234446	318872	424698	13003.5	3773.13	18533	1.17719	0.0286993	0.132208	0.0361033	-4.79173	down
XMW0042	GC-MS	C2H3N3O	3H-1,2,4-Triazol-3-one, 1,2-dihydro-	1,2-二氢-3H-1,2,4-三唑-3-酮	Heterocyclic compound	杂环化合物	-	-	930-33-6	52329.7	71538.8	88228	6757.26	2656.33	10227	1.16117	0.0213298	0.130844	0.0926023	-3.43281	down
XMW1388	GC-MS	C4H8N2	1H-Imidazole, 4,5-dihydro-2-methyl-	1H-咪唑，4,5-二氢-2-甲基-	Heterocyclic compound	杂环化合物	-	-	534-26-9	407682	525249	698766	25691.3	7491.3	34234.1	1.17721	0.0244666	0.130844	0.0413169	-4.59712	down
XMW0650	GC-MS	C5H8O	2-Butenal, 3-methyl-	3-甲基-2-丁醛	Aldehyde	醛	-	-	107-86-8	6624.76	12245.2	12533	113940	63160.7	229524	1.15727	0.126007	0.219139	12.9486	3.69472	up
XMW0065	GC-MS	C4H6N2	Fomepizole	甲吡唑	Heterocyclic compound	杂环化合物	-	-	7554-65-6	10635.9	9390.88	11059.9	129278	35805.6	357119	1.07086	0.228365	0.311486	16.7983	4.07024	up
XMW1208	GC-MS	CH2N4	1H-Tetrazole	1H-四唑	Heterocyclic compound	杂环化合物	-	-	288-94-8	3126.23	2042.14	4807.58	17445.6	5768.47	19227.5	1.01692	0.119662	0.214364	4.25439	2.08895	up
D207	GC-MS	C2H5NO	Acetamide	乙酰胺	Amine	胺	-	-	60-35-5	4904.88	4721.63	6685.67	2686.19	1657.66	3045.08	1.08479	0.0219002	0.130844	0.45297	-1.14251	down
