# Supplementary material for: Metabolomics Analysis Reveals the Differences Between Bupleurum chinense DC. and Bupleurum scorzonerifolium Willd
Source: Front Plant Sci. 2022 Jul 13;13:933849. doi: 10.3389/fpls.2022.933849 (PMC9328751; doi:10.3389/fpls.2022.933849)
Supplement: Supplementary file 7 [file Table_7.XLSX]

## Sheet: Sheet1
Index	Platform	Formula	Compounds	物质	Class I	物质一级分类	Class II	物质二级分类	CAS	BsR1	BsR2	BsR3	BsF1	BsF2	BsF3	VIP	p_value	FDR	Fold_Change	Log2FC	Type
pmb0782	UPLC-MS/MS	C5H11N	Piperidine	哌啶	Alkaloids	生物碱	Alkaloids	生物碱	110-89-4	2533600	960110	1417600	11008000	10984000	11407000	1.11406	0.00120521	0.0180988	6.80043	2.76563	up
mws4052	UPLC-MS/MS	C4H7NO2	1-Aminocyclopropane-1-carboxylic acid	1-氨基环丙烷-1-羧酸	Organic acids	有机酸	Organic acids	有机酸	22059-21-8	179240	175110	215230	97154	64959	116630	1.03164	0.0085403	0.0398894	0.489383	-1.03096	down
pme3033	UPLC-MS/MS	C4H9NO2	N,N-Dimethylglycine	N,N-二甲基甘氨酸	Amino acids and derivatives	氨基酸及其衍生物	Amino acids and derivatives	氨基酸及其衍生物	1118-68-9	1201600	1051400	1497900	5796300	5651900	5074000	1.14263	0.000294459	0.00862274	4.40486	2.1391	up
mws0574	UPLC-MS/MS	C4H8O3	2-Hydroxyisobutyric acid	2-羟基异丁酸	Organic acids	有机酸	Organic acids	有机酸	594-61-6	37399	27544	29235	264370	264260	255130	1.15201	7.44726e-07	0.000436161	8.32211	3.05695	up
MWS2076	UPLC-MS/MS	C6H7NO	2-Aminophenol	2-氨基苯酚	Alkaloids	生物碱	Alkaloids	生物碱	95-55-6	3633.2	1639.5	1568.7	25290	16316	22578	1.12087	0.0143324	0.0459406	9.38171	3.22985	up
MWStz040	UPLC-MS/MS	C5H9NO2	Pterolactam	蕨内酰胺	Alkaloids	生物碱	Pyrrole alkaloids	吡咯类生物碱	38072-88-7	70148	115800	82916	2266300	4156300	2371500	1.1432	0.0434848	0.0796692	32.7084	5.03159	up
pme0006	UPLC-MS/MS	C5H9NO2	L-Proline	L-脯氨酸	Amino acids and derivatives	氨基酸及其衍生物	Amino acids and derivatives	氨基酸及其衍生物	147-85-3	139160	183450	158100	3287800	5589000	3122600	1.14538	0.0403647	0.0760167	24.9618	4.64165	up
pme0066	UPLC-MS/MS	C3H7N3O2	Guanidinoacetate	乙酸胍	Amino acids and derivatives	氨基酸及其衍生物	Amino acids and derivatives	氨基酸及其衍生物	352-97-6	2297.1	2846.7	2031.5	4877.2	7227.1	12952	1.02936	0.129451	0.177	3.49202	1.80406	up
mws0256	UPLC-MS/MS	C5H11NO2	L-Valine	L-缬氨酸	Amino acids and derivatives	氨基酸及其衍生物	Amino acids and derivatives	氨基酸及其衍生物	72-18-4	4516100	2501100	2981300	12992000	12308000	13337000	1.12184	0.000875188	0.0154229	3.86428	1.9502	up
pme0120	UPLC-MS/MS	C5H11NO2	5-Aminovaleric acid	5-氨基戊酸	Organic acids	有机酸	Organic acids	有机酸	660-88-8	19372	14807	29563	83070	53321	67140	1.07278	0.017324	0.0494017	3.19304	1.67493	up
mws0470	UPLC-MS/MS	C4H6O4	Methylmalonic acid	甲基丙二酸	Organic acids	有机酸	Organic acids	有机酸	516-05-2	33384000	44685000	32669000	61430000	105180000	95497000	1.04775	0.0530144	0.088965	2.36691	1.24301	up
mws0192	UPLC-MS/MS	C4H6O4	Succinic acid	琥珀酸	Organic acids	有机酸	Organic acids	有机酸	110-15-6	32350000	43018000	30089000	59526000	91517000	87711000	1.05913	0.0342021	0.0693917	2.26399	1.17887	up
mws0147	UPLC-MS/MS	C5H10O3	β-Hydroxyisovaleric acid	β-羟基异戊酸	Organic acids	有机酸	Organic acids	有机酸	625-08-1	104020	83150	63806	219560	191030	159860	1.07481	0.00973411	0.0409664	2.27293	1.18455	up
pme3096	UPLC-MS/MS	C3H5NO4	Aminomalonic acid	氨基丙二酸	Organic acids	有机酸	Organic acids	有机酸	1068-84-4	1211600	1690200	1216600	2342200	4401100	3656700	1.0386	0.0652024	0.105101	2.52525	1.33643	up
pmp001287	UPLC-MS/MS	C8H9N	N-Benzylmethylene isomethylamine	N-苯亚甲基异甲胺	Alkaloids	生物碱	Alkaloids	生物碱	-	1853900	652510	1180600	8075000	6386700	7927100	1.0997	0.00132297	0.0189464	6.07235	2.60225	up
pme0195	UPLC-MS/MS	C3H7NO2S	L-Cysteine	L-半胱氨酸	Amino acids and derivatives	氨基酸及其衍生物	Amino acids and derivatives	氨基酸及其衍生物	52-90-4	31916	47642	11408	9	9	9	1.14873	0.101799	0.148802	0.000296814	-11.7182	down
mws0133	UPLC-MS/MS	C6H6N2O	Nicotinamide	烟酰胺	Others	其它类	Vitamin	维生素	98-92-0	354300	415190	373600	1041200	1116100	1711600	1.11543	0.0494757	0.085031	3.3846	1.75898	up
Lmbp000668	UPLC-MS/MS	C6H5NO2	Isonicotinic acid	异烟酸	Others	其它类	Vitamin	维生素	55-22-1	406130	298530	321320	2539900	1541800	2179300	1.13701	0.0256178	0.0596764	6.10246	2.60939	up
pme0490	UPLC-MS/MS	C6H5NO2	Nicotinic acid (Vitamin B3)	烟酸 (维生素 B3)	Others	其它类	Vitamin	维生素	59-67-6	397090	280960	322740	2445700	1664500	2001500	1.14215	0.0155182	0.0479399	6.10688	2.61043	up
pme1216	UPLC-MS/MS	C6H5NO2	2-Picolinic acid	2-吡啶甲酸	Organic acids	有机酸	Organic acids	有机酸	98-98-6	98626	66427	91122	987220	719880	1012800	1.14613	0.0120738	0.0420411	10.6174	3.40835	up
MWS2027	UPLC-MS/MS	C4H4N2O3	Barbituric acid;Malonylurea;2,4,6-Pyrimidinetrione	巴比妥酸;丙二酰脲;2,4,6-嘧啶三酮	Nucleotides and derivatives	核苷酸及其衍生物	Nucleotides and derivatives	核苷酸及其衍生物	67-52-7	1723600	1788300	1653400	525710	818910	430880	1.09467	0.00598309	0.036405	0.343736	-1.54063	down
MWSmce706	UPLC-MS/MS	C5H8N2O2	Cyclo(Ala-Gly)	环(甘氨酰-L-丙氨酰)	Amino acids and derivatives	氨基酸及其衍生物	Amino acids and derivatives	氨基酸及其衍生物	4526-77-6	55220	52821	42051	140490	104720	147590	1.11495	0.0187192	0.0509476	2.61706	1.38795	up
pme2693	UPLC-MS/MS	C6H14N2O	N-Acetylputrescine	N-乙酰腐胺	Alkaloids	生物碱	Phenolamine	酚胺	18233-70-0	8253.6	1675.8	979.15	81071	64672	94391	1.08729	0.00867981	0.0399155	22.0134	4.46031	up
mws0216	UPLC-MS/MS	C5H9NO3	Trans-4-Hydroxy-L-proline	反-4-羟基-L-脯氨酸	Amino acids and derivatives	氨基酸及其衍生物	Amino acids and derivatives	氨基酸及其衍生物	51-35-4	3534400	1520700	2119500	14826000	16781000	17785000	1.12192	0.000370834	0.0095817	6.88429	2.78331	up
MWS1926	UPLC-MS/MS	C6H13NO2	DL-Leucine	DL-亮氨酸	Amino acids and derivatives	氨基酸及其衍生物	Amino acids and derivatives	氨基酸及其衍生物	328-39-2	1649600	1404500	1528400	6987900	4880000	8086800	1.13166	0.0314894	0.0662597	4.35454	2.12252	up
pme0274	UPLC-MS/MS	C6H13NO2	6-Aminocaproic acid	6-氨基己酸	Organic acids	有机酸	Organic acids	有机酸	60-32-2	2801500	1073100	1514500	10743000	11690000	10176000	1.10818	0.000213502	0.00735535	6.05092	2.59715	up
mws1587	UPLC-MS/MS	C6H13NO2	L-Norleucine	L-正亮氨酸	Amino acids and derivatives	氨基酸及其衍生物	Amino acids and derivatives	氨基酸及其衍生物	327-57-1	18101000	8629500	10848000	76120000	68264000	71675000	1.12434	0.000116407	0.00552777	5.74954	2.52345	up
pme2679	UPLC-MS/MS	C6H13NO2	L-Allo-isoleucine	L-别异亮氨酸	Amino acids and derivatives	氨基酸及其衍生物	Amino acids and derivatives	氨基酸及其衍生物	1509-34-8	2388900	1057700	1416400	11747000	11646000	10413000	1.12494	8.22264e-05	0.00466038	6.95168	2.79736	up
mws0227	UPLC-MS/MS	C6H13NO2	L-Leucine	L-亮氨酸	Amino acids and derivatives	氨基酸及其衍生物	Amino acids and derivatives	氨基酸及其衍生物	61-90-5	17410000	8165900	10426000	75224000	69591000	71016000	1.12487	0.000192879	0.00732114	5.99499	2.58376	up
pmp001198	UPLC-MS/MS	C6H13NO2	6-Deoxyfagomine	6-脱氧荞麦碱	Alkaloids	生物碱	Piperidine alkaloids	哌啶类生物碱	197449-09-5	2800400	1095200	1508300	11983000	11545000	12044000	1.11467	0.00124328	0.0183566	6.58265	2.71867	up
mws0258	UPLC-MS/MS	C6H13NO2	L-Isoleucine	L-异亮氨酸	Amino acids and derivatives	氨基酸及其衍生物	Amino acids and derivatives	氨基酸及其衍生物	73-32-5	17179000	7995900	10639000	73188000	67826000	70266000	1.12427	0.000240562	0.00764846	5.89939	2.56056	up
pme0243	UPLC-MS/MS	C5H8O4	Glutaric acid	戊二酸	Organic acids	有机酸	Organic acids	有机酸	110-94-1	387030	303770	903440	2804300	5247900	3835100	1.08413	0.0330065	0.0681462	7.45641	2.89848	up
Lmmn000806	UPLC-MS/MS	C5H8O4	Dimethylmalonic acid	二甲基丙二酸	Organic acids	有机酸	Organic acids	有机酸	595-46-0	37945	29083	49800	228540	164590	233220	1.12768	0.0120161	0.0420411	5.3613	2.42258	up
mws0473	UPLC-MS/MS	C5H8O4	2-Methylsuccinic acid	2-甲基丁二酸	Organic acids	有机酸	Organic acids	有机酸	498-21-5	372740	329920	460350	2142700	1621700	2378900	1.13796	0.0155129	0.0479399	5.28224	2.40115	up
mws0001	UPLC-MS/MS	C4H8N2O3	L-Asparagine	L-天冬酰胺	Amino acids and derivatives	氨基酸及其衍生物	Amino acids and derivatives	氨基酸及其衍生物	70-47-3	10029000	2760500	4634700	476330	626290	706360	1.08345	0.139335	0.187165	0.10382	-3.26784	down
Lmrn002746	UPLC-MS/MS	C6H12O3	2-Hydroxy-4-methylpentanoic acid	2-羟基-4-甲基戊酸	Organic acids	有机酸	Organic acids	有机酸	498-36-2	137710	123750	123220	14680	25694	4091.7	1.05451	0.000204175	0.00732114	0.115591	-3.11289	down
MWS1882	UPLC-MS/MS	C4H7NO4	Iminodiacetic acid	亚氨基二乙酸	Organic acids	有机酸	Organic acids	有机酸	142-73-4	958710	776690	1013400	319930	119080	226070	1.06861	0.0019546	0.0225936	0.241953	-2.0472	down
mws0219	UPLC-MS/MS	C4H7NO4	L-Aspartic Acid	L-天冬氨酸	Amino acids and derivatives	氨基酸及其衍生物	Amino acids and derivatives	氨基酸及其衍生物	56-84-8	7542200	6455400	8389800	2407300	980970	1723800	1.08638	0.00165928	0.02128	0.228346	-2.13071	down
MWSmce701	UPLC-MS/MS	C9H10O	4-Ethylbenzaldehyde	4-乙基苯甲醛	Others	其它类	Others	其它	4748-78-1	16959	24109	22034	83089	85093	75405	1.13926	0.000149533	0.00597112	3.86021	1.94868	up
pmb0374	UPLC-MS/MS	C5H5N5	2-Aminopurine	2-氨基嘌呤	Nucleotides and derivatives	核苷酸及其衍生物	Nucleotides and derivatives	核苷酸及其衍生物	452-06-2	215210	247360	154140	694160	709600	587140	1.12051	0.00103393	0.0167095	3.22826	1.69076	up
mws0889	UPLC-MS/MS	C4H8O5	D-Threonic Acid	D-苏糖酸	Others	其它类	Saccharides and Alcohols	糖及醇类	3909-12-4	299040	220960	493160	2307700	2002400	1866000	1.11765	0.000918752	0.015826	6.09588	2.60783	up
pme1173	UPLC-MS/MS	C5H4N4O	Allopurinol	别嘌呤醇	Nucleotides and derivatives	核苷酸及其衍生物	Nucleotides and derivatives	核苷酸及其衍生物	315-30-0	3716.1	5625.3	3661.2	43841	14676	23600	1.07873	0.115489	0.162072	6.31543	2.65888	up
mws1336	UPLC-MS/MS	C7H7NO2	4-Aminobenzoic acid	对氨基苯甲酸	Phenolic acids	酚酸类	Phenolic acids	酚酸类	150-13-0	9	9	9	98121	84678	176190	1.15476	0.0524176	0.0881317	13295.9	13.6987	up
pma0948	UPLC-MS/MS	C8H11NO	Phenylethanolamine	苯基乙醇胺	Alkaloids	生物碱	Alkaloids	生物碱	7568-93-6	9	9	9	77527	108960	88036	1.15541	0.0100413	0.0409664	10167.5	13.3117	up
pme1002	UPLC-MS/MS	C8H11NO	L-Tyramine	L-酪胺	Amino acids and derivatives	氨基酸及其衍生物	Amino acids and derivatives	氨基酸及其衍生物	51-67-2	9	9	9	235760	297930	193610	1.15537	0.015264	0.0474732	26937	14.7173	up
mws0749	UPLC-MS/MS	C7H6O3	4-Hydroxybenzoic acid	4-羟基苯甲酸	Phenolic acids	酚酸类	Phenolic acids	酚酸类	99-96-7	52692	42581	40053	723320	808130	470620	1.14514	0.0253853	0.0594692	14.7944	3.88698	up
Lmgn001670	UPLC-MS/MS	C7H6O3	Salicylic acid	水杨酸	Phenolic acids	酚酸类	Phenolic acids	酚酸类	69-72-7	46893	65765	92313	645700	876050	728620	1.13604	0.00777567	0.0388329	10.979	3.45667	up
Lmbn001981	UPLC-MS/MS	C7H6O3	2,5-Dihydroxybenzaldehyde	2,5-二羟基苯甲醛	Phenolic acids	酚酸类	Phenolic acids	酚酸类	1194-98-5	175520	179020	123820	887620	1073000	654330	1.12865	0.0256349	0.0596764	5.46649	2.45061	up
Hmgn001653	UPLC-MS/MS	C7H6O3	Protocatechualdehyde	原儿茶醛	Phenolic acids	酚酸类	Phenolic acids	酚酸类	139-85-5	196330	195390	131590	973360	1026000	617170	1.11914	0.0293984	0.0634101	4.99996	2.32192	up
mws2368	UPLC-MS/MS	C8H10O2	Tyrosol	酪醇	Phenolic acids	酚酸类	Phenolic acids	酚酸类	501-94-0	1655.8	8964.8	2225.2	68776	104280	74960	1.09564	0.0156113	0.0479399	19.3072	4.27106	up
pme2828	UPLC-MS/MS	C6H5NO3	4-Nitrophenol	4-硝基苯酚	Phenolic acids	酚酸类	Phenolic acids	酚酸类	100-02-7	1090600	1125600	2087600	5039900	4360200	5577800	1.09067	0.00181314	0.0218615	3.48016	1.79915	up
pme3207	UPLC-MS/MS	C6H6O4	Muconic acid	己二烯二酸	Organic acids	有机酸	Organic acids	有机酸	1119-72-8	6688400	8360400	6546600	997740	1114600	1072600	1.15169	0.0087092	0.0399155	0.147482	-2.76139	down
Hmsp000364	UPLC-MS/MS	C7H13NO2	L-Cyclopentylglycine	环戊基甘氨酸	Amino acids and derivatives	氨基酸及其衍生物	Amino acids and derivatives	氨基酸及其衍生物	2521-84-8	826740	496770	513020	10176000	6792600	10820000	1.14299	0.0195907	0.0522049	15.131	3.91944	up
pme0295	UPLC-MS/MS	C6H11NO3	4-Acetamidobutyric acid	4-乙酰氨基丁酸	Organic acids	有机酸	Organic acids	有机酸	3025-96-5	117270	87817	83960	746920	1108800	752970	1.14244	0.0224064	0.0551372	9.02514	3.17395	up
pme3351	UPLC-MS/MS	C6H11NO3	Allysine(6-Oxo DL-Norleucine)	烯丙酯	Others	其它类	Others	其它	1962-83-0	15978	18070	11392	93896	183920	114660	1.12611	0.0504579	0.0860348	8.63724	3.11057	up
pme2380	UPLC-MS/MS	C5H6O5	α-Ketoglutaric acid	α-酮戊二酸	Organic acids	有机酸	Organic acids	有机酸	328-50-7	633910	686210	571440	359270	227720	301140	1.08003	0.00287392	0.0271478	0.469523	-1.09073	down
mws0208	UPLC-MS/MS	C6H10O4	Adipic Acid	己二酸	Organic acids	有机酸	Organic acids	有机酸	124-04-9	642650	808920	683720	329670	365150	372110	1.12853	0.0144114	0.0460091	0.499665	-1.00097	down
Zmzn000113	UPLC-MS/MS	C5H9NO4	L-threo-3-Methylaspartate	L-苏式-3-甲基天冬氨酸	Amino acids and derivatives	氨基酸及其衍生物	Amino acids and derivatives	氨基酸及其衍生物	6061-13-8	1366900	1058400	1618000	270910	155690	320950	1.10787	0.0147794	0.0466203	0.184886	-2.43529	down
pme0014	UPLC-MS/MS	C5H9NO4	L-Glutamic acid	L-谷氨酸	Amino acids and derivatives	氨基酸及其衍生物	Amino acids and derivatives	氨基酸及其衍生物	56-86-0	44253000	53660000	51095000	5594200	3823900	7440200	1.13639	0.00158189	0.0208977	0.113137	-3.14386	down
pmp001285	UPLC-MS/MS	C8H4O3	Phthalic anhydride	邻苯二甲酸酐	Phenolic acids	酚酸类	Phenolic acids	酚酸类	85-44-9	80873	113810	92447	249620	215140	244420	1.1238	0.000655169	0.0145713	2.46989	1.30445	up
MWS3036	UPLC-MS/MS	C5H8O5	3-Hydroxyglutaric acid	3-羟基戊二酸	Organic acids	有机酸	Organic acids	有机酸	638-18-6	25154	31326	22268	221640	307880	318320	1.14597	0.0134631	0.0443802	10.7665	3.42848	up
Zmyn000247	UPLC-MS/MS	C5H8O5	2-Hydroxyglutaric Acid	2-羟基戊二酸	Organic acids	有机酸	Organic acids	有机酸	13095-48-2	183310	178570	199550	1107500	1320000	1154400	1.15248	0.00379172	0.0302821	6.37996	2.67355	up
Lmbn000216	UPLC-MS/MS	C5H8O5	3-Methylmalic acid	3-甲基苹果酸	Organic acids	有机酸	Organic acids	有机酸	152204-30-3	204750	191630	200060	1192000	1207400	1382800	1.15424	0.00320438	0.0281505	6.34129	2.66478	up
pmb2826	UPLC-MS/MS	C5H8O5	L-Citramalic acid	2-甲基苹果酸	Organic acids	有机酸	Organic acids	有机酸	6236-09-5	176180	145400	165800	1903800	2736500	2525500	1.15045	0.0122875	0.042582	14.7027	3.87801	up
Zmyn000230	UPLC-MS/MS	C5H8O5	2-Dehydro-3-deoxy-L-arabinonate	2-脱氢-3-脱氧-L-阿拉伯糖	Others	其它类	Saccharides and Alcohols	糖及醇类	-	342660	420120	333450	995790	1097700	943050	1.13945	0.000748483	0.0151745	2.76998	1.46988	up
ML10171848	UPLC-MS/MS	C5H8O5	D-Arabinono-1,4-lactone	D-阿拉伯-1,4-内酯	Others	其它类	Saccharides and Alcohols	糖及醇类	2782-09-4	29386	11927	19727	208100	292940	258000	1.12993	0.00881457	0.0399155	12.4351	3.63635	up
mws2213	UPLC-MS/MS	C9H8O2	Cinnamic acid	肉桂酸	Phenolic acids	酚酸类	Phenolic acids	酚酸类	140-10-3	2614.9	546.32	1230.7	16300	14462	20330	1.09268	0.00678509	0.0374105	11.6332	3.54017	up
Lmgp000796	UPLC-MS/MS	C8H7NO2	4-Hydroxymandelonitrile	4-羟基扁桃腈	Alkaloids	生物碱	Phenolamine	酚胺	13093-65-7	2594300	866960	898990	15684000	8343500	11889000	1.09019	0.0311678	0.065978	8.23726	3.04216	up
pme1210	UPLC-MS/MS	C5H11NO2S	L-Methionine	L-甲硫氨酸	Amino acids and derivatives	氨基酸及其衍生物	Amino acids and derivatives	氨基酸及其衍生物	63-68-3	2289500	774100	699560	13199000	7067900	9362900	1.08315	0.0322387	0.0673525	7.87365	2.97703	up
mws0847	UPLC-MS/MS	C6H7N5	1-Methyladenine	1-甲基腺嘌呤	Nucleotides and derivatives	核苷酸及其衍生物	Nucleotides and derivatives	核苷酸及其衍生物	5142-22-3	37868	20278	17623	287110	108000	142320	1.08216	0.105246	0.151758	7.09301	2.8264	up
MWSmce199	UPLC-MS/MS	C5H10O5	L-Xylose	L-木糖	Others	其它类	Saccharides and Alcohols	糖及醇类	609-06-3	185020	152730	317050	631800	502450	644890	1.05451	0.00537873	0.035662	2.71707	1.44205	up
MWSmce682	UPLC-MS/MS	C5H10O5	DL-Xylose	DL-木糖	Others	其它类	Saccharides and Alcohols	糖及醇类	25990-60-7	137930	129200	266970	549890	503170	572130	1.07033	0.00638079	0.0373701	3.04286	1.60543	up
Zmgn000173	UPLC-MS/MS	C5H10O5	D-Ribose	D-核糖	Others	其它类	Saccharides and Alcohols	糖及醇类	50-69-1	9046.3	4344.6	9694.9	842800	796070	754990	1.14902	0.0009837	0.0164648	103.694	6.69619	up
mws1499	UPLC-MS/MS	C5H10O5	D-Arabinose	D-阿拉伯糖	Others	其它类	Saccharides and Alcohols	糖及醇类	10323-20-3	122700	128580	292310	527480	438640	597750	1.02229	0.0100194	0.0409664	2.87693	1.52453	up
pme0183	UPLC-MS/MS	C5H5N5O	Isoguanine	异鸟嘌呤	Nucleotides and derivatives	核苷酸及其衍生物	Nucleotides and derivatives	核苷酸及其衍生物	3373-53-3	58306	45965	43268	366480	280000	255850	1.14358	0.0159304	0.0481847	6.11587	2.61256	up
pme1109	UPLC-MS/MS	C5H5N5O	Guanine	鸟嘌呤	Nucleotides and derivatives	核苷酸及其衍生物	Nucleotides and derivatives	核苷酸及其衍生物	73-40-5	40255	35594	34000	255580	76665	187910	1.03629	0.119653	0.166585	4.73518	2.24342	up
MWS2984	UPLC-MS/MS	C4H4N6O	8-Azaguanine	8-氮鸟嘌呤	Nucleotides and derivatives	核苷酸及其衍生物	Nucleotides and derivatives	核苷酸及其衍生物	134-58-7	13747	6539.3	7965.1	43782	24323	44174	1.06785	0.0394052	0.0752037	3.97428	1.99069	up
mws0183	UPLC-MS/MS	C7H6O4	3,4-Dihydroxybenzoic acid (Protocatechuic acid)	3,4-二羟基苯甲酸; 原儿茶酸	Phenolic acids	酚酸类	Phenolic acids	酚酸类	99-50-3	127370	221510	88672	891380	798380	783480	1.10853	0.000227811	0.00741231	5.65245	2.49888	up
mws0180	UPLC-MS/MS	C7H6O4	2,5-Dihydroxybenzoic acid; Gentisic Acid	2,5-二羟基苯甲酸; 龙胆酸	Phenolic acids	酚酸类	Phenolic acids	酚酸类	490-79-9	58197	85198	32725	328400	342200	328560	1.10597	0.00152144	0.0205628	5.67318	2.50416	up
mws0639	UPLC-MS/MS	C7H6O4	2,3-Dihydroxybenzoic Acid	2,3-二羟基苯甲酸	Organic acids	有机酸	Organic acids	有机酸	303-38-8	107410	169050	74020	741820	661030	695130	1.11946	0.000108028	0.005423	5.98602	2.5816	up
mws1417	UPLC-MS/MS	C9H7NO2	Indole-3-carboxylic acid	吲哚-3-甲酸	Alkaloids	生物碱	Plumerane	吲哚类生物碱	771-50-6	5950.8	10723	15866	10390000	1387000	7160800	1.12955	0.139092	0.186981	581.989	9.18485	up
mws0102	UPLC-MS/MS	C9H7NO2	Indole-5-carboxylic acid	吲哚-5-甲酸	Alkaloids	生物碱	Plumerane	吲哚类生物碱	1670-81-1	4408.8	1160.1	6855	4706200	596530	3345600	1.12099	0.140171	0.188	696.104	9.44316	up
mws1346	UPLC-MS/MS	C6H11NO4	DL-2-Aminoadipic acid	DL-2-氨基己二酸	Alkaloids	生物碱	Alkaloids	生物碱	542-32-5	3036400	1844200	2916700	898990	1227400	1394200	1.02476	0.04963	0.085031	0.451514	-1.14716	down
Hmqn002118	UPLC-MS/MS	C9H6O3	Umbelliferone	伞形酮	Lignans and Coumarins	木脂素和香豆素	Coumarins	香豆素	93-35-6	36517	15071	291560	920110	2376900	1406200	1.00466	0.0713259	0.112495	13.7061	3.77674	up
MWS0559	UPLC-MS/MS	C6H10O5	1,6-anhydro-β-D-glucose	1,6-脱水-β-D-葡萄糖	Others	其它类	Saccharides and Alcohols	糖及醇类	498-07-7	7812.9	10502	23972	230750	186850	208680	1.12168	0.00150763	0.0205628	14.8103	3.88853	up
Lmbp000123	UPLC-MS/MS	C6H13NO2S	L-Homomethionine	L-高甲硫氨酸	Amino acids and derivatives	氨基酸及其衍生物	Amino acids and derivatives	氨基酸及其衍生物	25148-30-5	1211.4	721.12	2010.5	146780	38819	59138	1.12449	0.136312	0.184241	62.0684	5.95579	up
pme1419	UPLC-MS/MS	C6H13NO2S	L-Methionine methyl ester	L-甲硫氨酸甲酯	Amino acids and derivatives	氨基酸及其衍生物	Amino acids and derivatives	氨基酸及其衍生物	10332-17-9	9243.6	5066.7	8476.2	35446	31814	39267	1.12211	0.00104463	0.0167095	4.675	2.22497	up
Lmmn001643	UPLC-MS/MS	C9H8O3	2-Hydroxycinnamic acid	2-羟基肉桂酸	Organic acids	有机酸	Organic acids	有机酸	583-17-5	15266	12599	23582	559120	374510	355610	1.14392	0.0236273	0.05677	25.0596	4.64729	up
pme1439	UPLC-MS/MS	C9H8O3	p-coumaric acid	对香豆酸	Phenolic acids	酚酸类	Phenolic acids	酚酸类	501-98-4	15941	5766.7	30478	349680	833740	460080	1.10354	0.0681593	0.109167	31.4933	4.97697	up
mws0159	UPLC-MS/MS	C9H8O3	Phenylpyruvic acid	苯丙酮酸	Organic acids	有机酸	Organic acids	有机酸	156-06-9	8680.5	4804.2	2357.1	76806	135550	92673	1.11732	0.0304041	0.0647515	19.2547	4.26714	up
MWSCX015	UPLC-MS/MS	C9H8O3	(E)-3-(3,4-dihydroxyphenyl)acrylaldehyde	咖啡醛	Others	其它类	Others	其它	-	50740	19440	45629	686160	1253900	665070	1.12492	0.0496736	0.085031	22.4951	4.49154	up
pme3083	UPLC-MS/MS	C8H7NO3	2-(Formylamino)benzoic acid	2-(甲酰氨基)苯甲酸	Phenolic acids	酚酸类	Phenolic acids	酚酸类	3342-77-6	30718	17654	52929	870450	1301000	813520	1.13164	0.024258	0.0574837	29.4663	4.881	up
pme0021	UPLC-MS/MS	C9H11NO2	L-Phenylalanine	L-苯丙氨酸	Amino acids and derivatives	氨基酸及其衍生物	Amino acids and derivatives	氨基酸及其衍生物	63-91-2	5300300	1950000	3096300	22557000	19557000	23527000	1.1076	0.000349175	0.00915673	6.34421	2.66544	up
pme0282	UPLC-MS/MS	C8H6O4	Phthalic acid	邻苯二甲酸	Organic acids	有机酸	Organic acids	有机酸	88-99-3	56021	46890	24506	253780	123210	222920	1.06695	0.050574	0.0860348	4.70824	2.23519	up
pme0281	UPLC-MS/MS	C8H6O4	Terephthalic acid	对苯二甲酸	Phenolic acids	酚酸类	Phenolic acids	酚酸类	100-21-0	387740	308230	404510	2144200	1648800	1888100	1.14584	0.00676098	0.0374105	5.16238	2.36804	up
pmc0274	UPLC-MS/MS	C6H6N4S	6-Methylmercaptopurine	6-甲基巯嘌呤	Nucleotides and derivatives	核苷酸及其衍生物	Nucleotides and derivatives	核苷酸及其衍生物	50-66-8	7061400	2454500	4259500	32393000	25251000	32699000	1.10242	0.00235239	0.0245713	6.55829	2.71332	up
pma2400	UPLC-MS/MS	C11H18O	Dihydrojasmone	二氢茉莉酮	Organic acids	有机酸	Organic acids	有机酸	1128-08-1	15483	9	9	803990	538000	520970	1.0061	0.021151	0.0537804	120.183	6.90909	up
NK10253223	UPLC-MS/MS	C8H9NO3	2-Amino-3-methoxybenzoic acid	2-氨基-3-甲氧基苯甲酸	Phenolic acids	酚酸类	Phenolic acids	酚酸类	3177-80-8	235570	277830	186980	996820	836760	869220	1.13778	0.00111119	0.0172776	3.85905	1.94824	up
Zmjp000624	UPLC-MS/MS	C8H9NO3	Pyridoxal	吡哆醛	Others	其它类	Vitamin	维生素	66-72-8	236440	276130	198460	1157600	880190	959780	1.14037	0.00791242	0.0388329	4.21581	2.07581	up
mws2125	UPLC-MS/MS	C3H5O6P	Phosphoenolpyruvate	磷酸烯醇式丙酮酸	Organic acids	有机酸	Organic acids	有机酸	138-08-9	20187	28305	15047	4551.4	1360.5	4358.3	1.04866	0.036659	0.0718992	0.161636	-2.62918	down
mws0028	UPLC-MS/MS	C8H8O4	Vanillic acid	香草酸	Phenolic acids	酚酸类	Phenolic acids	酚酸类	121-34-6	132650	216610	95183	616340	546260	400930	1.06791	0.012683	0.043354	3.51795	1.81474	up
Hmtp000827	UPLC-MS/MS	C8H8O4	Griffonilide	格列风内酯	Others	其它类	Others	其它	61371-55-9	24108	49291	30935	106440	106520	112470	1.08763	0.00705219	0.0379579	3.11912	1.64114	up
MWSslk138	UPLC-MS/MS	C7H6O5	2,3,4-Trihydroxybenzoic acid	2,3,4-三羟基苯甲酸	Phenolic acids	酚酸类	Phenolic acids	酚酸类	610-02-6	9	9	9	74474	45755	67533	1.15555	0.0185817	0.0507747	6954.15	12.7637	up
pme0253	UPLC-MS/MS	C8H15NO3	N-Acetyl-L-leucine	N-乙酰-L-亮氨酸	Amino acids and derivatives	氨基酸及其衍生物	Amino acids and derivatives	氨基酸及其衍生物	1188-21-2	8497.2	6682.9	25777	102080	74816	71121	1.05738	0.00671829	0.0374105	6.05553	2.59825	up
MA10039492	UPLC-MS/MS	C6H6O6	Dehydroascorbic acid	脱氢抗坏血酸	Others	其它类	Vitamin	维生素	490-83-5	61173	16905	86568	290630	275620	631640	1.01961	0.0933678	0.138553	7.27555	2.86306	up
pme2550	UPLC-MS/MS	C6H6O6	Cis-Aconitic acid	顺式乌头酸	Organic acids	有机酸	Organic acids	有机酸	585-84-2	6060.8	4343.9	5484.1	960100	821590	1478000	1.15298	0.0324771	0.0676094	205.156	7.68058	up
pme3009	UPLC-MS/MS	C6H6O6	Trans-Citridic acid	反式乌头酸	Organic acids	有机酸	Organic acids	有机酸	4023-65-8	9	9	9	82962	108290	100550	1.15556	0.005884	0.036405	10807.5	13.3997	up
mws0154	UPLC-MS/MS	C7H10O5	Shikimic acid	莽草酸	Organic acids	有机酸	Organic acids	有机酸	138-59-0	8766.2	23900	12712	2709500	1403800	4019500	1.14111	0.0702786	0.111343	179.223	7.48561	up
Zmyn000155	UPLC-MS/MS	C7H14N2O3	N-α-Acetyl-L-ornithine	N-α-乙酰基-L-鸟氨酸	Amino acids and derivatives	氨基酸及其衍生物	Amino acids and derivatives	氨基酸及其衍生物	6205-08-9	4939300	1445300	4400000	100750	90600	230730	1.10425	0.085999	0.129811	0.0391373	-4.67531	down
MWSmce119	UPLC-MS/MS	C6H14N4O2	L-Arginine	L-精氨酸	Amino acids and derivatives	氨基酸及其衍生物	Amino acids and derivatives	氨基酸及其衍生物	74-79-3	18682000	4192300	17051000	633950	482490	1085500	1.0757	0.110873	0.157227	0.0551515	-4.18046	down
pme1651	UPLC-MS/MS	C10H9NO2	Indole 3-acetic acid (IAA)	吲哚-3-乙酸	Alkaloids	生物碱	Plumerane	吲哚类生物碱	87-51-4	12806	9735.2	14760	157140	95004	93386	1.13643	0.0387073	0.0744078	9.26324	3.21152	up
pme0008	UPLC-MS/MS	C6H13N3O3	L-Citrulline	L-瓜氨酸	Amino acids and derivatives	氨基酸及其衍生物	Amino acids and derivatives	氨基酸及其衍生物	372-75-8	1934500	627400	1413900	230810	241420	358640	1.03644	0.108426	0.15463	0.208982	-2.25855	down
mws4175	UPLC-MS/MS	C6H8O6	D-Glucurono-6,3-lactone	D-葡萄糖醛酸-6,3-内酯	Others	其它类	Saccharides and Alcohols	糖及醇类	32449-92-6	96730	87378	100120	197400	213220	258660	1.13053	0.0166023	0.0487796	2.35473	1.23556	up
Lmbn001754	UPLC-MS/MS	C7H12O5	3-Isopropylmalic Acid	3-异丙基苹果酸	Organic acids	有机酸	Organic acids	有机酸	921-28-8	712190	534770	621250	9889700	7833100	7527100	1.15185	0.00869196	0.0399155	13.5156	3.75655	up
pmb3101	UPLC-MS/MS	C7H12O5	2-Isopropylmalic Acid	2-异丙基苹果酸	Organic acids	有机酸	Organic acids	有机酸	49601-06-1	483610	426350	435850	8792700	6408700	6128500	1.15226	0.0156889	0.0479399	15.8491	3.98633	up
Zmgn001448	UPLC-MS/MS	C7H12O5	2-Propylmalic Acid	2-丙基苹果酸	Organic acids	有机酸	Organic acids	有机酸	-	636440	563710	567710	10159000	6795300	7216900	1.15106	0.0194445	0.0520793	13.6726	3.77321	up
mws1013	UPLC-MS/MS	C9H6O4	Esculetin	秦皮乙素	Lignans and Coumarins	木脂素和香豆素	Coumarins	香豆素	305-01-1	295720	334540	268770	109040	185420	105370	1.05316	0.00854223	0.0398894	0.444735	-1.16898	down
pmb2795	UPLC-MS/MS	C10H10O3	4-Methoxycinnamic acid	4-甲氧基肉桂酸	Phenolic acids	酚酸类	Phenolic acids	酚酸类	830-09-1	3404.4	1759.7	4326.6	306630	430290	202090	1.14235	0.0424297	0.0783907	98.94	6.62848	up
Jmzn006005	UPLC-MS/MS	C10H10O3	3,4-methylenedioxy cinnamyl alcohol	3,4-亚甲二氧肉桂醇	Lignans and Coumarins	木脂素和香豆素	Lignans	木脂素	58095-76-4	7341.3	2798.7	6358.7	622050	896560	414180	1.14178	0.0446358	0.0805386	117.148	6.87219	up
pme0516	UPLC-MS/MS	C6H12O6	Inositol	肌醇	Others	其它类	Saccharides and Alcohols	糖及醇类	87-89-8	222620	297090	253360	2161000	2385800	2082400	1.15093	0.00134363	0.0189464	8.57516	3.10016	up
mws4170	UPLC-MS/MS	C6H12O6	D-Glucose	D-葡萄糖	Others	其它类	Saccharides and Alcohols	糖及醇类	50-99-7	438870	563680	805920	8865100	8566900	8445000	1.1449	1.34766e-06	0.000591959	14.3088	3.83883	up
mws1164	UPLC-MS/MS	C6H12O6	D-Fructose	D-果糖	Others	其它类	Saccharides and Alcohols	糖及醇类	57-48-7	435650	542960	686950	9313500	8364900	8293800	1.14958	0.00105564	0.0167095	15.5937	3.96289	up
mws0093	UPLC-MS/MS	C10H12O3	Coniferyl alcohol	松柏醇	Phenolic acids	酚酸类	Phenolic acids	酚酸类	458-35-5	70791	89300	63767	3997	3739.8	5330.5	1.14932	0.0112875	0.0413481	0.0583732	-4.09855	down
Hmcn006267	UPLC-MS/MS	C9H10O4	2,6-Dimethoxybenzoic acid	2,6-二甲氧基苯甲酸	Phenolic acids	酚酸类	Phenolic acids	酚酸类	1466-76-8	12488	6895.2	9956.3	554500	552190	665130	1.15176	0.00403507	0.0310948	60.3903	5.91624	up
mws1350	UPLC-MS/MS	C9H10O4	Syringaldehyde; 4-Hydroxy-3,5-Dimethoxybenzaldehyde	丁香醛; 4-羟基-3,5-二甲氧基苯甲醛	Phenolic acids	酚酸类	Phenolic acids	酚酸类	134-96-3	13261	18629	12174	96752	83671	66259	1.13438	0.0132841	0.0441282	5.59827	2.48498	up
MWSmce455	UPLC-MS/MS	C9H10O4	Vanillic acid methyl ester	香草酸甲酯	Phenolic acids	酚酸类	Phenolic acids	酚酸类	3943-74-6	10206	7181.1	7114.1	516760	537540	616610	1.15418	0.00303055	0.0277327	68.1971	6.09164	up
pme2596	UPLC-MS/MS	C8H9NO4	4-Pyridoxic acid	4-吡哆酸	Others	其它类	Vitamin	维生素	82-82-6	11418	11747	17639	81346	64744	81434	1.13627	0.00377385	0.030277	5.57602	2.47924	up
Lmcn002039	UPLC-MS/MS	C9H12O4	Antiarol; 3,4,5-Trimethoxyphenol	3,4,5-三甲氧基苯酚	Phenolic acids	酚酸类	Phenolic acids	酚酸类	642-71-7	74111	101130	105440	8193200	6304700	6212200	1.15318	0.00885294	0.0399861	73.7852	6.20526	up
mws0237	UPLC-MS/MS	C9H16O4	Azelaic acid	壬二酸	Organic acids	有机酸	Organic acids	有机酸	123-99-9	503470	354660	384680	1044800	648010	857650	1.04324	0.0478114	0.0833526	2.05217	1.03715	up
mws0736	UPLC-MS/MS	C8H16N2O3	N-Glycyl-L-leucine	N-甘氨酰-L-亮氨酸	Amino acids and derivatives	氨基酸及其衍生物	Amino acids and derivatives	氨基酸及其衍生物	869-19-2	168500	30607	87602	4927400	3883900	3984500	1.12259	0.00572743	0.0363289	44.6299	5.47994	up
mws5041	UPLC-MS/MS	C8H16N2O3	L-Glycyl-L-isoleucine	L-甘氨酰-L-异亮氨酸	Amino acids and derivatives	氨基酸及其衍生物	Amino acids and derivatives	氨基酸及其衍生物	19461-38-2	144090	39123	83639	3490000	3165000	3269400	1.13401	0.000324088	0.00879196	37.1907	5.21687	up
Zmdp000292	UPLC-MS/MS	C7H16N4O2	Arginine methyl ester	精氨酸甲酯	Amino acids and derivatives	氨基酸及其衍生物	Amino acids and derivatives	氨基酸及其衍生物	-	22500000	4747000	19292000	979400	1344400	2019900	1.03977	0.123044	0.170495	0.0933346	-3.42144	down
Hmcp002123	UPLC-MS/MS	C10H8O4	Isoscopoletin (6-Hydroxy-7-Methoxycoumarin)	异莨菪亭	Lignans and Coumarins	木脂素和香豆素	Coumarins	香豆素	776-86-3	68976	20406	24030	2402700	1523200	1155900	1.13003	0.0462129	0.0816014	44.8083	5.48569	up
mws1189	UPLC-MS/MS	C6H10O7	D-Galacturonic acid	D-半乳糖醛酸	Organic acids	有机酸	Organic acids	有机酸	685-73-4	51097	48142	35313	401000	403980	421270	1.15053	2.7522e-06	0.000771791	9.11358	3.18802	up
MWSmce632	UPLC-MS/MS	C10H10O4	Vanillin acetate	香兰素乙酸酯	Others	其它类	Others	其它	881-68-5	3990	8797	1269.4	149830	290490	146890	1.10565	0.0560709	0.0931159	41.7753	5.38458	up
Lmdn003756	UPLC-MS/MS	C10H10O4	Methyl caffeate	咖啡酸甲酯	Phenolic acids	酚酸类	Phenolic acids	酚酸类	3843-74-1	9	9	9	210660	143770	200900	1.15577	0.0124646	0.0426978	20567.8	14.3281	up
mws0027	UPLC-MS/MS	C9H10O5	Syringic acid	丁香酸	Phenolic acids	酚酸类	Phenolic acids	酚酸类	530-57-4	9	9	9	289910	118570	221700	1.15477	0.0518799	0.0873114	23340	14.5105	up
mws1076	UPLC-MS/MS	C11H10O4	Scoparone	滨蒿内酯	Lignans and Coumarins	木脂素和香豆素	Coumarins	香豆素	120-08-1	9	9	9	494450	599540	382640	1.15542	0.0158052	0.0481278	54690	15.739	up
Zmpn000199	UPLC-MS/MS	C6H10O8	D-Galactaric acid	D-半乳糖二酸	Others	其它类	Saccharides and Alcohols	糖及醇类	526-99-8	2104300	2281700	4583700	21727000	27212000	24917000	1.12274	0.00130355	0.0189284	8.23394	3.04158	up
Zmyn000108	UPLC-MS/MS	C6H10O8	D-Saccharic acid	D-蔗糖酸	Others	其它类	Saccharides and Alcohols	糖及醇类	87-73-0	4336200	3657600	6694600	25810000	28521000	28698000	1.13034	6.46212e-05	0.00466038	5.65269	2.49894	up
Hmcn000192	UPLC-MS/MS	C7H14O7	Sedoheptulose	景天庚酮糖	Others	其它类	Saccharides and Alcohols	糖及醇类	3019-74-7	2193400	2147100	2675800	8751600	11390000	12012000	1.14019	0.012111	0.0420533	4.5827	2.1962	up
MWSmce355	UPLC-MS/MS	C10H12O5	Methyl Syringate	丁香酸甲酯	Phenolic acids	酚酸类	Phenolic acids	酚酸类	884-35-5	9	9	9	254090	121540	229170	1.15509	0.0383758	0.0739889	22400	14.4512	up
mws0863	UPLC-MS/MS	C5H11O7P	2-Deoxyribose-5'-phosphate	2-脱氧核糖-5'-磷酸	Nucleotides and derivatives	核苷酸及其衍生物	Nucleotides and derivatives	核苷酸及其衍生物	102916-66-5	239200	187880	175360	45247	40452	56640	1.13392	0.0120543	0.0420411	0.236271	-2.08149	down
pme0170	UPLC-MS/MS	C8H16N4O3	N-Acetyl-L-Arginine	N-乙酰-L-精氨酸	Amino acids and derivatives	氨基酸及其衍生物	Amino acids and derivatives	氨基酸及其衍生物	155-84-0	1673.3	7413.6	4899.6	45371	51111	18333	1.02925	0.0760638	0.118374	8.20899	3.0372	up
mws0677	UPLC-MS/MS	C12H14N2O2	N-Acetyl-5-hydroxytryptamine	N-乙酰-5-羟基色胺	Alkaloids	生物碱	Plumerane	吲哚类生物碱	1210-83-9	20105	9253	6028	9	9	9	1.14923	0.109486	0.15551	0.000763014	-10.356	down
MWSmce257	UPLC-MS/MS	C9H17NO5	D-Pantothenic Acid	D-泛酸(维生素B5)	Others	其它类	Vitamin	维生素	79-83-4	552450	506660	593010	1061300	1041100	1230900	1.13365	0.0051079	0.035057	2.01759	1.01263	up
pme1228	UPLC-MS/MS	C11H12N2O3	5-Hydroxy-L-tryptophan	5-羟基-L-色氨酸	Amino acids and derivatives	氨基酸及其衍生物	Amino acids and derivatives	氨基酸及其衍生物	56-69-9	2963.5	8273.2	7063.8	722140	380470	873690	1.1389	0.0464762	0.0817404	107.992	6.75478	up
Lmtp005226	UPLC-MS/MS	C15H24O	Santalol	檀香醇	Others	其它类	Others	其它	11031-45-1	5999.1	16019	13062	130640	29056	80718	1.00021	0.143394	0.191011	6.85329	2.7768	up
Lmjp002764	UPLC-MS/MS	C11H10O5	Umckalin (7-hydroxy-5,6-dimethoxycoumarin)	5,6-二甲氧基-7-羟基香豆素	Lignans and Coumarins	木脂素和香豆素	Coumarins	香豆素	43053-62-9	78480	38094	83631	241400	162930	156880	1.01967	0.0291004	0.0628899	2.80318	1.48706	up
MWS4296	UPLC-MS/MS	C11H14N2O3	Glycylphenylalanine	甘氨酰苯基丙氨酸	Amino acids and derivatives	氨基酸及其衍生物	Amino acids and derivatives	氨基酸及其衍生物	3321-03-7	105670	10728	51571	2601500	2108400	2544500	1.0995	0.00345412	0.0287625	43.1889	5.43259	up
mws5042	UPLC-MS/MS	C11H14N2O3	L-Glycyl-L-phenylalanine	L-甘氨酰-L-苯丙氨酸	Amino acids and derivatives	氨基酸及其衍生物	Amino acids and derivatives	氨基酸及其衍生物	721-66-4	111680	16902	53689	2771000	1996900	2385000	1.11352	0.0083557	0.0396779	39.2432	5.29437	up
mws0520	UPLC-MS/MS	C11H13NO4	N-Acetyl-L-tyrosine	N-乙酰-L-酪氨酸	Amino acids and derivatives	氨基酸及其衍生物	Amino acids and derivatives	氨基酸及其衍生物	537-55-3	5396	3856.2	8036.6	135160	82095	81335	1.13603	0.0337336	0.0689467	17.2707	4.11026	up
Lmmp003517	UPLC-MS/MS	C13H20O3	Solatuberenol A	Solatuberenol A	Others	其它类	Others	其它	-	368140	252660	442160	3124600	3207600	1796900	1.12137	0.0340374	0.0692922	7.64761	2.93501	up
Lmyp003951	UPLC-MS/MS	C11H14O5	3-Hydroxy-1-(4-hydroxy-3,5-dimethoxyphenyl)propan-1-one	3-羟基-1-(4-羟基-3,5-二甲氧基苯基)丙-1-酮	Phenolic acids	酚酸类	Phenolic acids	酚酸类	-	32631	47441	39090	150570	104390	146650	1.11852	0.01749	0.0494017	3.37029	1.75287	up
Lmdp002381	UPLC-MS/MS	C11H14O5	Genipin	京尼平	Terpenoids	萜类	Monoterpenoids	倍萜	6902-77-8	10129	2317.1	30712	327690	115490	785910	1.02381	0.183527	0.233167	28.4788	4.83182	up
Cmsp002787	UPLC-MS/MS	C11H14O5	3,4'-Dihydroxy-3',5'-dimethoxypropiophenone	3,4'-二羟基-3',5'-二甲氧基苯乙酮	Phenolic acids	酚酸类	Phenolic acids	酚酸类	136196-47-9	26854	60683	48130	590650	281950	422460	1.1118	0.0478469	0.0833526	9.54587	3.25488	up
pme1194	UPLC-MS/MS	C9H13N3O4	2'-Deoxycytidine	2'-脱氧胞苷	Nucleotides and derivatives	核苷酸及其衍生物	Nucleotides and derivatives	核苷酸及其衍生物	951-77-9	85336	40071	54254	115470	160470	202620	1.01587	0.0386457	0.0743707	2.66368	1.41342	up
Zmnn007376	UPLC-MS/MS	C14H12O3	Xanthyletin	花椒内酯	Lignans and Coumarins	木脂素和香豆素	Coumarins	香豆素	553-19-5	9	9	9	32284	20965	37982	1.15513	0.0260082	0.0599689	3378.93	11.7223	up
Lmhp001461	UPLC-MS/MS	C11H20N2O3	L-Prolyl-L-Leucine	L-脯氨酰-L-亮氨酸	Amino acids and derivatives	氨基酸及其衍生物	Amino acids and derivatives	氨基酸及其衍生物	52899-07-7	79815	10302	25762	4067700	3543300	4127700	1.1255	0.00204984	0.0230251	101.301	6.66251	up
Lmhp001670	UPLC-MS/MS	C11H22N2O3	L-Valyl-L-Leucine	L-缬氨酰-L-亮氨酸	Amino acids and derivatives	氨基酸及其衍生物	Amino acids and derivatives	氨基酸及其衍生物	3989-97-7	13557	1814	7816.2	8671100	6653400	10602000	1.14059	0.0169868	0.049306	1118.14	10.1269	up
pmb0962	UPLC-MS/MS	C10H22N2O4	L-Lysine-Butanoic Acid	L-赖氨酸丁酸酯	Amino acids and derivatives	氨基酸及其衍生物	Amino acids and derivatives	氨基酸及其衍生物	80407-71-2	3027.4	979.43	6843.9	62501	81578	79543	1.09125	0.00445347	0.0326642	20.6089	4.3652	up
Hmlp006964	UPLC-MS/MS	C12H12O5	5,6,7-Trimethoxycoumarin	5,6,7-三甲氧基香豆素	Lignans and Coumarins	木脂素和香豆素	Coumarins	香豆素	55085-47-7	9	9	9	149930	80061	165360	1.15499	0.037445	0.0728322	14642.6	13.8379	up
MWSHY0202	UPLC-MS/MS	C16H12O2	6-Methylflavone	6-甲基黄酮	Flavonoids	黄酮	Flavones	黄酮	29976-75-8	3309.1	3294.7	11217	60702	51127	40222	1.08257	0.00804778	0.038846	8.53222	3.09292	up
mws4176	UPLC-MS/MS	C12H16N2O3	L-Alanyl-L-Phenylalanine	L-丙氨酰-L-苯丙氨酸	Amino acids and derivatives	氨基酸及其衍生物	Amino acids and derivatives	氨基酸及其衍生物	3061-90-3	35027	1243.1	18360	1381000	947060	1279800	1.0656	0.0116815	0.0415301	66.0416	6.0453	up
Lmyn000160	UPLC-MS/MS	C8H14O8	Mucic acid Dimethyl Ester	粘酸二甲酯	Phenolic acids	酚酸类	Phenolic acids	酚酸类	-	230360	174760	372760	1795200	1493700	1635500	1.12322	0.000410295	0.0102984	6.33054	2.66233	up
pme0264	UPLC-MS/MS	C10H14N2O5	Thymidine	胸苷	Nucleotides and derivatives	核苷酸及其衍生物	Nucleotides and derivatives	核苷酸及其衍生物	50-89-5	135980	133460	43823	774550	1109900	1229300	1.09811	0.0168515	0.0491827	9.93973	3.31321	up
Zmcp102602	UPLC-MS/MS	C17H22O	Bupleurynol	柴胡炔醇	Others	其它类	Others	其它	-	16713000	14243000	17792000	4229400	910650	2835200	1.04304	0.000699209	0.0148013	0.163602	-2.61174	down
pme3732	UPLC-MS/MS	C9H13N3O5	Cytidine	胞苷	Nucleotides and derivatives	核苷酸及其衍生物	Nucleotides and derivatives	核苷酸及其衍生物	65-46-3	2107800	2623600	1992700	18549000	10626000	13842000	1.13566	0.0335251	0.0686522	6.39744	2.67749	up
ML10180524	UPLC-MS/MS	C9H13N3O5	Cytarabine	胞嘧啶阿拉伯糖苷	Nucleotides and derivatives	核苷酸及其衍生物	Nucleotides and derivatives	核苷酸及其衍生物	147-94-4	617400	554420	467820	18876000	8813400	13717000	1.14528	0.0447992	0.0805386	25.2533	4.6584	up
mws0248	UPLC-MS/MS	C9H12N2O6	Uridine	尿嘧啶核苷	Nucleotides and derivatives	核苷酸及其衍生物	Nucleotides and derivatives	核苷酸及其衍生物	58-96-8	809070	1379600	636510	3265700	2574100	2522100	1.06359	0.00499195	0.0346674	2.95978	1.56549	up
pme2266	UPLC-MS/MS	C10H16N2O3S	Biotin	D-生物素	Others	其它类	Vitamin	维生素	58-85-5	74262	132470	52314	386750	513580	485180	1.09886	0.00241008	0.0249088	5.34851	2.41914	up
Lmhp002031	UPLC-MS/MS	C12H24N2O3	L-Leucyl-L-Leucine	L-亮氨酰-L-亮氨酸	Amino acids and derivatives	氨基酸及其衍生物	Amino acids and derivatives	氨基酸及其衍生物	3303-31-9	9	9	9	4560100	3580400	6823100	1.15556	0.0351193	0.0705831	554207	19.0801	up
Lmrj002087	UPLC-MS/MS	C10H18N2O5	L-Isoleucyl-L-Aspartate	L-异亮氨酰-L-天冬氨酸	Amino acids and derivatives	氨基酸及其衍生物	Amino acids and derivatives	氨基酸及其衍生物	-	102270	81157	58740	1896500	1877900	1755200	1.15069	0.000266572	0.00807531	22.8338	4.5131	up
pme3961	UPLC-MS/MS	C10H13N5O3	2'-Deoxyadenosine	2'-脱氧腺苷	Nucleotides and derivatives	核苷酸及其衍生物	Nucleotides and derivatives	核苷酸及其衍生物	958-09-8	762240	457150	325820	5507100	5760800	7377200	1.13369	0.00800085	0.0388329	12.0664	3.59292	up
pme1187	UPLC-MS/MS	C10H14N2O6	5-Methyluridine	5-甲基尿苷	Nucleotides and derivatives	核苷酸及其衍生物	Nucleotides and derivatives	核苷酸及其衍生物	1463-10-1	9	9	9	31087	14931	23352	1.15469	0.0384052	0.0739889	2569.26	11.3271	up
mws1090	UPLC-MS/MS	C6H13O9P	Glucose-1-phosphate	葡萄糖-1-磷酸	Others	其它类	Saccharides and Alcohols	糖及醇类	59-56-3	1197600	2535400	1208400	417220	618260	302760	1.03472	0.108273	0.15463	0.270822	-1.88458	down
mws0866	UPLC-MS/MS	C6H13O9P	D-Glucose 6-phosphate	D-葡萄糖-6-磷酸	Others	其它类	Saccharides and Alcohols	糖及醇类	56-73-5	1217800	2404500	1157900	424980	622710	284270	1.02983	0.0980145	0.144231	0.278641	-1.84352	down
Lmhp001732	UPLC-MS/MS	C14H18N2O3	L-Prolyl-L-Phenylalanine	L-脯氨酰-L-苯丙氨酸	Amino acids and derivatives	氨基酸及其衍生物	Amino acids and derivatives	氨基酸及其衍生物	13589-02-1	30620	22306	29006	373210	478940	432400	1.15109	0.00551274	0.035894	15.6782	3.97069	up
Lmtn004049	UPLC-MS/MS	C15H20O4	Abscisic acid	脱落酸	Organic acids	有机酸	Organic acids	有机酸	21293-29-8	7360.6	18375	28843	235460	112040	178650	1.07709	0.044206	0.0801547	9.64023	3.26907	up
Lmhp002001	UPLC-MS/MS	C14H20N2O3	L-Valyl-L-Phenylalanine	L-缬氨酰-L-苯丙氨酸	Amino acids and derivatives	氨基酸及其衍生物	Amino acids and derivatives	氨基酸及其衍生物	3918-92-1	5288.3	1651.5	9332.6	1660900	1529700	2740100	1.13789	0.0358107	0.0709351	364.464	8.50963	up
pme0230	UPLC-MS/MS	C10H13N5O4	Adenosine	腺苷	Nucleotides and derivatives	核苷酸及其衍生物	Nucleotides and derivatives	核苷酸及其衍生物	58-61-7	5720600	6272400	3454700	20060000	16848000	17150000	1.10902	0.000751386	0.0151745	3.49942	1.80712	up
pme1184	UPLC-MS/MS	C10H13N5O4	2'-Deoxyguanosine	2'-脱氧鸟苷	Nucleotides and derivatives	核苷酸及其衍生物	Nucleotides and derivatives	核苷酸及其衍生物	961-07-9	376460	201750	111340	1776800	2472200	2699600	1.1061	0.0123234	0.0426092	10.077	3.333	up
pme2890	UPLC-MS/MS	C8H16N2O4S2	L-Homocystine	L-高胱氨酸	Amino acids and derivatives	氨基酸及其衍生物	Amino acids and derivatives	氨基酸及其衍生物	626-72-2	3666.5	8204.9	14708	302830	196060	341800	1.12166	0.0242985	0.0574837	31.6294	4.98319	up
Zmyn003693	UPLC-MS/MS	C16H12O4	6-Hydroxy-2'-methoxyflavone	6-羟基-2'-甲氧基黄酮	Flavonoids	黄酮	Flavones	黄酮	61546-59-6	11320	10743	9863.7	9	9	9	1.15571	0.0015818	0.0208977	0.000845687	-10.2076	down
mws1297	UPLC-MS/MS	C13H18O6	Benzyl glucoside	苄基葡萄糖苷	Phenolic acids	酚酸类	Phenolic acids	酚酸类	4304-12-5	6899.2	3955.5	4590.2	41794	18916	29446	1.1029	0.0613499	0.0996227	5.83727	2.54529	up
pme2960	UPLC-MS/MS	C15H12O5	Naringenin chalcone; 2',4,4',6'-Tetrahydroxychalcone	柚皮素查耳酮	Flavonoids	黄酮	Chalcones	查耳酮	73692-50-9	9	9	9	433970	1500400	730630	1.15297	0.107696	0.15409	98703.7	16.5908	up
pme0376	UPLC-MS/MS	C15H12O5	Naringenin (5,7,4'-Trihydroxyflavanone)	柚皮素	Flavonoids	黄酮	Flavanones	二氢黄酮	480-41-1	1324.6	12005	2559.5	7446400	5630700	3615700	1.13569	0.0373986	0.0728322	1050.58	10.037	up
mws0914	UPLC-MS/MS	C15H12O5	Pinobanksin	短叶松素	Flavonoids	黄酮	Flavanonols	二氢黄酮醇	548-82-3	9	919.12	9	273320	855400	465310	1.09417	0.0901497	0.134803	1700.99	10.7322	up
mws1038	UPLC-MS/MS	C11H22N2O4S	Pantetheine	泛酰巯基乙胺	Others	其它类	Others	其它	496-65-1	9	9	9	47516	48312	96538	1.15435	0.0583809	0.0959543	7124.67	12.7986	up
MWSmce341	UPLC-MS/MS	C16H22O4	Butyl isobutyl phthalate	邻苯二甲酸-1-丁酯-2-异丁酯	Others	其它类	Others	其它	17851-53-5	5262400	5829900	5879800	15998000	13612000	17084000	1.14331	0.00862354	0.0399155	2.75122	1.46007	up
pmp001230	UPLC-MS/MS	C16H22O4	Senkyunolide M	洋川芎内酯 M	Others	其它类	Others	其它	146986-60-9	468380	518880	608580	1497500	1102100	1739300	1.10398	0.0337474	0.0689467	2.71888	1.44301	up
Lmxp011770	UPLC-MS/MS	C16H22O4	Diisobutyl phthalate	邻苯二甲酸二异丁酯	Phenolic acids	酚酸类	Phenolic acids	酚酸类	84-69-5	5790300	5844000	5836700	15518000	12030000	18382000	1.12071	0.0354897	0.0705831	2.62893	1.39447	up
Lmlp012720	UPLC-MS/MS	C16H22O4	Dibutyl phthalate	邻苯二甲酸二丁酯	Phenolic acids	酚酸类	Phenolic acids	酚酸类	84-74-2	5130300	4986500	4359500	13697000	10892000	16418000	1.12359	0.0287938	0.0627567	2.8327	1.50218	up
MWSmce692	UPLC-MS/MS	C18H30O2	γ-Linolenic Acid	γ-亚麻酸	Lipids	脂质	Free fatty acids	游离脂肪酸	506-26-3	15673	25030	16177	208150	157030	166870	1.14281	0.0078129	0.0388329	9.3539	3.22557	up
pmb0889	UPLC-MS/MS	C18H30O2	Punicic acid (9Z,11E,13Z-octadecatrienoic acid)	石榴酸 (9Z,11E,13Z-十八碳三烯酸)	Lipids	脂质	Free fatty acids	游离脂肪酸	544-72-9	958100	482190	677180	7801200	4027100	7198200	1.12083	0.0388963	0.0746205	8.98549	3.1676	up
pmb1650	UPLC-MS/MS	C18H30O2	Octadeca-11E,13E,15Z-trienoic acid	十八碳-9E,13E,15Z-三烯酸	Lipids	脂质	Free fatty acids	游离脂肪酸	25575-00-2	1370500	1335900	1532700	4213600	3748400	4828000	1.14283	0.00972873	0.0409664	3.01715	1.59319	up
Lmbn005923	UPLC-MS/MS	C18H30O2	Crepenynic acid	顺式十八碳-9-烯-12-炔酸	Lipids	脂质	Free fatty acids	游离脂肪酸	2277-31-8	22575	28622	15111	219980	151920	221170	1.13464	0.0145099	0.0461845	8.94417	3.16095	up
mws0629	UPLC-MS/MS	C13H16N2O5	L-Aspartyl-L-Phenylalanine	L-天冬氨酰-L-苯丙氨酸	Amino acids and derivatives	氨基酸及其衍生物	Amino acids and derivatives	氨基酸及其衍生物	13433-09-5	20834	8438	17616	729770	713210	793240	1.14482	0.000886575	0.0154229	47.6928	5.5757	up
Lmbn006152	UPLC-MS/MS	C18H32O2	(9Z,11E)-Octadecadienoic acid	(9Z,11E)-十八碳二烯酸	Lipids	脂质	Free fatty acids	游离脂肪酸	2540-56-9	10797	16966	9316.3	41788	33105	42738	1.09751	0.00285619	0.0271478	3.17242	1.66558	up
mws1491	UPLC-MS/MS	C18H32O2	Linoleic acid	亚油酸	Lipids	脂质	Free fatty acids	游离脂肪酸	60-33-3	15644000	22507000	14075000	61473000	51887000	56772000	1.12216	0.000499263	0.0113923	3.25761	1.70381	up
Hmhp001812	UPLC-MS/MS	C11H15N5O4	2'-O-Methyladenosine	2-甲氧基腺苷	Nucleotides and derivatives	核苷酸及其衍生物	Nucleotides and derivatives	核苷酸及其衍生物	2140-79-6	126960	128640	88122	2924000	2016400	2160400	1.15001	0.0151142	0.0474732	20.6586	4.36867	up
MWS4354	UPLC-MS/MS	C11H15N5O4	N6-methyladenosine	N6-甲基腺苷	Nucleotides and derivatives	核苷酸及其衍生物	Nucleotides and derivatives	核苷酸及其衍生物	1867-73-8	72535	107810	64163	2004600	1665100	1731900	1.14976	0.00320059	0.0281505	22.0917	4.46543	up
pme1178	UPLC-MS/MS	C10H13N5O5	Guanosine	鸟苷	Nucleotides and derivatives	核苷酸及其衍生物	Nucleotides and derivatives	核苷酸及其衍生物	118-00-3	14358000	18576000	8541000	132000000	113820000	118330000	1.13267	0.000377866	0.0096219	8.77999	3.13422	up
MWSmce333	UPLC-MS/MS	C10H13N5O5	Crotonoside; 2-Hydroxyadenosine	巴豆苷; 2-羟基腺苷	Nucleotides and derivatives	核苷酸及其衍生物	Nucleotides and derivatives	核苷酸及其衍生物	1818-71-9	2484100	4532700	1588600	28993000	23576000	26996000	1.11777	0.000797856	0.0154048	9.24594	3.20882	up
MWSslk035	UPLC-MS/MS	C13H18O7	Orcinol glucoside	苔黑酚葡萄糖苷	Phenolic acids	酚酸类	Phenolic acids	酚酸类	21082-33-7	9	9	9	177660	31344	18993	1.14259	0.274387	0.323122	8444.33	13.0438	up
mws0064	UPLC-MS/MS	C15H12O6	Eriodictyol (5,7,3',4'-Tetrahydroxyflavanone)	圣草酚	Flavonoids	黄酮	Flavanones	二氢黄酮	552-58-9	3544.4	9	9	79566	158290	109910	1.02121	0.0373677	0.0728322	97.6213	6.60912	up
mws1094	UPLC-MS/MS	C15H12O6	Aromadendrin (DihydroKaempferol)	香橙素 (二氢山奈酚)	Flavonoids	黄酮	Flavanonols	二氢黄酮醇	480-20-6	9	9	9	78974	89612	34731	1.15308	0.056345	0.0933945	7530.26	12.8785	up
pmn001686	UPLC-MS/MS	C16H32O4	10,16-Dihydroxypalmitic acid	10,16-二羟基棕榈酸	Lipids	脂质	Free fatty acids	游离脂肪酸	3233-90-7	9	9	9	334360	483290	219770	1.15453	0.0453817	0.0808588	38423	15.2297	up
pmb3081	UPLC-MS/MS	C6H11PO11	Glucarate O-Phosphoric acid	磷酸葡萄糖酸	Others	其它类	Saccharides and Alcohols	糖及醇类	-	24578000	26074000	24772000	6539100	5539400	7997300	1.14022	8.19573e-05	0.00466038	0.266173	-1.90957	down
pme3163	UPLC-MS/MS	C7H15O10P	D-Sedoheptuiose 7-phosphate	D-景天庚酮糖 7-磷酸	Others	其它类	Saccharides and Alcohols	糖及醇类	2646-35-7	16651000	16596000	15700000	8098800	7995100	7460900	1.15117	7.25918e-05	0.00466038	0.481231	-1.0552	down
pmb2657	UPLC-MS/MS	C10H18N4O6	Argininosuccinic acid	精氨基琥珀酸	Organic acids	有机酸	Organic acids	有机酸	2387-71-5	77994	124050	80576	788360	506280	538190	1.13034	0.0258254	0.0598617	6.48514	2.69714	up
pmb0885	UPLC-MS/MS	C18H26O3	4-Oxo-9Z,11Z,13E,15E-Octadecatetraenoic Acid	4-氧化-9Z,11Z,13E,15E-十八碳四烯酸	Lipids	脂质	Free fatty acids	游离脂肪酸	-	3442.4	9	9	215890	140700	158430	1.03564	0.0170538	0.049306	148.833	7.21755	up
Zmyn004732	UPLC-MS/MS	C18H30O3	2R-hydroxy-9Z,12Z,15Z-octadecatrienoic acid	2R-羟基-9Z,12Z,15Z-十八碳三烯酸	Others	其它类	Others	其它	-	263730	286110	166290	2427200	2509000	1310500	1.12158	0.0401898	0.0758469	8.72286	3.1248	up
Zmpn003368	UPLC-MS/MS	C18H30O3	13S-Hydroxy-9Z,11E,15Z-octadecatrienoic acid	13S-羟基-9Z,11E,15Z-十八碳三烯酸	Lipids	脂质	Free fatty acids	游离脂肪酸	87984-82-5	8797.9	9254	5960.7	594730	173440	805150	1.12537	0.108642	0.154813	65.5206	6.03388	up
Zmyn004676	UPLC-MS/MS	C18H30O3	17-Hydroxylinolenic acid	17-羟基亚麻酸	Lipids	脂质	Free fatty acids	游离脂肪酸	-	123410	42166	81614	1384000	259060	1711700	1.01508	0.142332	0.190173	13.5716	3.76252	up
Lmmn006306	UPLC-MS/MS	C18H30O3	Machilusolide D	润楠丁内酯 D	Others	其它类	Others	其它	-	502300	576380	345150	4879000	5470900	2383900	1.11304	0.0568689	0.0939085	8.94334	3.16081	up
pmb2786	UPLC-MS/MS	C18H30O3	9-Hydroxy-10,12,15-octadecatrienoic acid	9-羟基-10,12,15-十八碳三烯酸	Lipids	脂质	Free fatty acids	游离脂肪酸	89886-42-0	1370.6	1779.5	4113.3	63896	38220	83511	1.12235	0.0448303	0.0805386	25.5565	4.67562	up
pmb2787	UPLC-MS/MS	C18H30O3	9-Oxo-10E,12Z-octadecadienoic acid	9-过氧-10E,12Z-十八碳二烯酸	Lipids	脂质	Free fatty acids	游离脂肪酸	54232-59-6	9	9	9	174180	93674	261170	1.15419	0.0676802	0.108498	19593.5	14.2581	up
Lmcn009539	UPLC-MS/MS	C19H34O2	E,E,Z-1,3,12-Nonadecatriene-5,14-diol	E,E,Z-1,3,12-十九碳三烯-5,14-二醇	Lipids	脂质	Free fatty acids	游离脂肪酸	-	2613.9	4105.4	2450.6	14290	11720	9456	1.10918	0.0151539	0.0474732	3.86765	1.95146	up
Lmqp000329	UPLC-MS/MS	C8H14N3O7P	5-Aminoimidazole ribonucleotide	5-氨基咪唑核糖核苷酸	Nucleotides and derivatives	核苷酸及其衍生物	Nucleotides and derivatives	核苷酸及其衍生物	25635-88-5	139830	236410	197020	738650	1333900	651200	1.08669	0.0766672	0.119102	4.75133	2.24833	up
Rfmb091	UPLC-MS/MS	C18H32O3	9S-Hydroxy-10E,12Z-octadecadienoic acid	9S-羟基-10E,12Z-十八碳二烯酸	Lipids	脂质	Free fatty acids	游离脂肪酸	15514-85-9	434000	154990	263400	3248700	809740	3984400	1.01887	0.128763	0.176281	9.43563	3.23812	up
pmb2799	UPLC-MS/MS	C18H32O3	12,13-Epoxy-9-Octadecenoic Acid	12,13-环氧-9-十八碳烯酸	Lipids	脂质	Free fatty acids	游离脂肪酸	6799-85-5	9082.4	9412.1	22711	90682	53213	113530	1.07331	0.0472226	0.0826395	6.24735	2.64324	up
Lmbn005369	UPLC-MS/MS	C18H32O3	13(S)-HODE;13(S)-Hydroxyoctadeca-9Z,11E-dienoic acid	13-羟基十八烷基-9,11-二烯酸	Lipids	脂质	Free fatty acids	游离脂肪酸	10219-69-9	408380	154150	247390	3316100	801910	3744500	1.02686	0.123655	0.170937	9.70776	3.27914	up
Lmbn005662	UPLC-MS/MS	C18H32O3	9(10)-EpOME;(9R,10S)-(12Z)-9,10-Epoxyoctadecenoic acid	9,10-环氧十八烯酸	Lipids	脂质	Free fatty acids	游离脂肪酸	16833-56-0	25079	27726	50660	994510	614780	1253100	1.13702	0.0380831	0.0736106	27.6653	4.79001	up
pme1474	UPLC-MS/MS	C11H15N5O3S	5'-Deoxy-5'-(methylthio)adenosine	5-脱氧-5-甲硫腺苷	Nucleotides and derivatives	核苷酸及其衍生物	Nucleotides and derivatives	核苷酸及其衍生物	2457-80-9	7001000	9010100	7905900	15836000	21457000	16612000	1.1057	0.0209662	0.0534654	2.25384	1.17238	up
pmb0197	UPLC-MS/MS	C11H15N5O5	N7-Methylguanosine	N7-甲基鸟苷	Nucleotides and derivatives	核苷酸及其衍生物	Nucleotides and derivatives	核苷酸及其衍生物	20244-86-4	24650	34631	17420	620060	450560	661360	1.14468	0.0129902	0.0436262	22.5809	4.49703	up
Lmmn002230	UPLC-MS/MS	C15H8O7	Demethylwedelolactone	去甲基蟛蜞菊内酯	Lignans and Coumarins	木脂素和香豆素	Coumarins	香豆素	6468-55-9	60682	31506	5634	1394900	1126500	1179600	1.09268	0.00356446	0.0292652	37.834	5.24161	up
MWSHY0009	UPLC-MS/MS	C16H12O6	Diosmetin (5,7,3'-Trihydroxy-4'-methoxyflavone)	香叶木素	Flavonoids	黄酮	Flavones	黄酮	520-34-3	9	9	9	172650	90638	179760	1.15508	0.0355125	0.0705831	16409.2	14.0022	up
Lmjp004941	UPLC-MS/MS	C16H12O6	Rhamnocitrin (7-MethylKaempferol)	鼠李柠檬素	Flavonoids	黄酮	Flavones	黄酮	569-92-6	9	3515.5	9	167940	90782	182870	1.02469	0.0359382	0.0710274	124.973	6.96547	up
MWS20189	UPLC-MS/MS	C16H12O6	Tectorigenin	鸢尾黄素	Flavonoids	黄酮	Isoflavones	异黄酮	548-77-6	2333.2	2359.8	5501	184220	88972	183550	1.13465	0.0421944	0.078202	44.805	5.48559	up
Zmhn001358	UPLC-MS/MS	C13H16O8	4-O-Glucosyl-4-hydroxybenzoic acid	4-O-葡萄糖基-4-羟基苯甲酸	Phenolic acids	酚酸类	Phenolic acids	酚酸类	-	76794	47232	22882	368590	168420	318420	1.05269	0.0513181	0.086698	5.8229	2.54174	up
Lmsn002247	UPLC-MS/MS	C13H16O8	1-O-Salicyloyl-β-D-glucose	1-O-水杨酰-β-D-葡萄糖	Phenolic acids	酚酸类	Phenolic acids	酚酸类	60517-74-0	83058	52217	52839	472540	426520	382390	1.14108	0.00194179	0.0225936	6.81209	2.7681	up
mws2367	UPLC-MS/MS	C14H20O7	Salidroside	红景天苷	Phenolic acids	酚酸类	Phenolic acids	酚酸类	10338-51-9	9	9	9	74728	84100	58030	1.15542	0.0109448	0.0411778	8031.78	12.9715	up
MWS5235	UPLC-MS/MS	C18H36O3	12-Hydroxyoctadecanoic acid	12-羟基硬脂酸	Lipids	脂质	Free fatty acids	游离脂肪酸	106-14-9	3902.6	2451	2029.4	31174	44136	27159	1.13562	0.0244912	0.0578373	12.2234	3.61158	up
Lmqn008288	UPLC-MS/MS	C18H36O3	3-Hydroxyoctadecanoic Acid	3-羟基十八烷酸	Lipids	脂质	Free fatty acids	游离脂肪酸	45261-96-9	137070	85412	131510	1187000	503780	780330	1.10839	0.0698025	0.111036	6.98069	2.80337	up
pme3514	UPLC-MS/MS	C15H10O7	Morin	桑色素	Flavonoids	黄酮	Flavonols	黄酮醇	480-16-0	131230	66411	29903	3501400	4989000	4642000	1.1328	0.0104829	0.0410063	57.7137	5.85084	up
mws1326	UPLC-MS/MS	C15H10O7	Herbacetin	草质素	Flavonoids	黄酮	Flavonols	黄酮醇	527-95-7	9	9	9	9457.1	13395	8775.7	1.15478	0.0181729	0.0502042	1171.4	10.194	up
Hmcn002875	UPLC-MS/MS	C15H10O7	6-Hydroxyluteolin	6-羟基木犀草素	Flavonoids	黄酮	Flavones	黄酮	18003-33-3	9	9	9	18382	30493	30140	1.15456	0.0220898	0.0546646	2926.48	11.515	up
pme2954	UPLC-MS/MS	C15H10O7	Quercetin	槲皮素	Flavonoids	黄酮	Flavonols	黄酮醇	117-39-5	13973	7257	32151	137810	388600	292560	1.07918	0.0716236	0.112863	15.342	3.93941	up
mws0463	UPLC-MS/MS	C16H14O6	Hesperetin	橙皮素	Flavonoids	黄酮	Flavanones	二氢黄酮	520-33-2	9	9	9	8201.3	12504	10264	1.15486	0.0142022	0.0456183	1147.01	10.1637	up
Hmqn000843	UPLC-MS/MS	C13H18O8	Tachioside	它乔糖苷	Phenolic acids	酚酸类	Phenolic acids	酚酸类	109194-60-7	1362400	889830	1024200	130020	121730	185120	1.13651	0.0196702	0.0522049	0.133337	-2.90685	down
Hmsn002598	UPLC-MS/MS	C13H18O8	Salirepin	柳匍匐次苷	Phenolic acids	酚酸类	Phenolic acids	酚酸类	26652-12-0	166050	95324	107890	300020	222270	272200	1.04595	0.0108648	0.0411633	2.15155	1.10538	up
pmp000022	UPLC-MS/MS	C16H16O6	Oxypeucedanin hydrate	氧化前胡素水合物	Lignans and Coumarins	木脂素和香豆素	Coumarins	香豆素	2643-85-8	9	9	9	157270	70650	118510	1.15493	0.0439861	0.0800037	12830.7	13.6473	up
pmb2791	UPLC-MS/MS	C18H30O4	9-Hydroperoxy-10E,12,15Z-octadecatrienoic acid	9-羟基过氧-10E,12,15Z-十八碳三烯酸	Lipids	脂质	Free fatty acids	游离脂肪酸	111004-08-1	12822	11229	8490.6	39864	20560	41034	1.05363	0.0695247	0.110748	3.11779	1.64053	up
Zmyn004449	UPLC-MS/MS	C18H30O4	9-Hydroxy-12-oxo-10(E),15(Z)-octadecadienoic acid	9-羟基-12-氧代-10(E),15(Z)-十八碳二烯酸	Lipids	脂质	Free fatty acids	游离脂肪酸	-	8589.1	5944.2	5085.5	76784	73880	40755	1.12814	0.0374239	0.0728322	9.75692	3.28643	up
Zmzn003953	UPLC-MS/MS	C18H30O4	13(s)-hydroperoxy-(9z,11e,15z)-octadecatrienoic acid	13-氢过氧化-9z,11e,15z-十八碳三烯酸	Lipids	脂质	Free fatty acids	游离脂肪酸	67597-26-6	62910	39353	59514	290000	202980	234760	1.12592	0.0124363	0.0426978	4.49841	2.16942	up
Lmlp004754	UPLC-MS/MS	C14H17NO7	Ehretioside B	2-(葡萄糖基氧基)-4-羟基苯乙腈	Alkaloids	生物碱	Alkaloids	生物碱	156368-84-2	22803	13121	14964	209990	215360	191710	1.14634	0.000328154	0.00879196	12.1258	3.60001	up
pme3967	UPLC-MS/MS	C12H17N5O5	2-(Dimethylamino)guanosine	2-(二甲基氨基)鸟苷	Nucleotides and derivatives	核苷酸及其衍生物	Nucleotides and derivatives	核苷酸及其衍生物	2140-67-2	228260	265710	171520	2064700	1050800	1480100	1.12541	0.0457144	0.0812347	6.90559	2.78776	up
Jmbn003691	UPLC-MS/MS	C15H20O7	3,4-dihydroxy-allylbenzene-3-O-β-D-glucopyranoside	3,4-二羟基烯丙基-3-O-β-D-葡萄吡喃糖苷	Others	其它类	Others	其它	-	48203	18141	29370	769290	638110	850470	1.1385	0.00643646	0.0374105	23.5898	4.56009	up
Lmbn005287	UPLC-MS/MS	C18H32O4	7S,8S-DiHODE; (9Z,12Z)-(7S,8S)-Dihydroxyoctadeca-9,12-dienoic acid	7,8-二羟基-9,12-十八碳二烯酸	Lipids	脂质	Free fatty acids	游离脂肪酸	143288-65-7	164740	255000	229130	776920	878060	734780	1.12802	0.000789064	0.0154043	3.68296	1.88086	up
pmn001689	UPLC-MS/MS	C18H32O4	9-Hydroxy-12-oxo-15(Z)-octadecenoic acid	9-羟基-12-氧代-15(Z)-十八碳烯酸	Lipids	脂质	Free fatty acids	游离脂肪酸	-	1973.2	1323.1	4733.9	83476	53116	98360	1.12362	0.0289674	0.0627567	29.2585	4.87079	up
MWS80006	UPLC-MS/MS	C18H32O4	9-Hydroperoxy-9Z,11E-Octadecadienoic Acid	9-过氧化羟基-9Z,11E-十八碳二烯酸	Lipids	脂质	Free fatty acids	游离脂肪酸	-	2251.3	2292.7	6558.1	78892	33040	61444	1.10377	0.0544396	0.0909613	15.6165	3.965	up
mws1174	UPLC-MS/MS	C17H14O6	3-O-Acetylpinobanksin	3-O-乙酰短叶松黄烷酮	Flavonoids	黄酮	Flavanonols	二氢黄酮醇	52117-69-8	329390	697410	255910	6860.5	8480.3	18099	1.12601	0.0927357	0.137848	0.0260696	-5.26149	down
Lmbn005487	UPLC-MS/MS	C18H34O4	12,13-DHOME; (9Z)-12,13-Dihydroxyoctadec-9-enoic acid	12,13-二羟基十八烷基-9-烯酸	Lipids	脂质	Free fatty acids	游离脂肪酸	263399-35-5	36462	38455	63457	296800	520130	285450	1.11751	0.0504913	0.0860348	7.96667	2.99398	up
Zmzp006646	UPLC-MS/MS	C16H12O7	Capillarisin	茵陈色原酮	Others	其它类	Others	其它	56365-38-9	180680	104260	82999	1269900	1538200	1512400	1.13686	0.00184254	0.0220227	11.7424	3.55366	up
mws0066	UPLC-MS/MS	C16H12O7	Isorhamnetin	异鼠李素	Flavonoids	黄酮	Flavonols	黄酮醇	480-19-3	214440	123170	90058	997880	1147200	1136300	1.12448	0.000145489	0.00594476	7.67273	2.93974	up
mws2627	UPLC-MS/MS	C16H12O7	Tamarixetin (3,3',5,7-Tetrahydroxy-4'-Methoxyflavone)	柽柳黄素	Flavonoids	黄酮	Flavonols	黄酮醇	603-61-2	47843	33682	22169	345720	399070	398270	1.13776	0.000695851	0.0148013	11.0234	3.4625	up
Lmfp001509	UPLC-MS/MS	C13H16O9	1-O-Galloyl-rhamnose	1-O-没食子酰-鼠李糖	Tannins	鞣质	Tannin	鞣质	-	277500	158960	405040	81745	77082	78991	1.05256	0.105289	0.151758	0.282612	-1.82311	down
Lmsp013116	UPLC-MS/MS	C20H32O3	Ent-16α,17-Dihydroxykauran-2-one	对映-16α,17-二羟基-贝壳杉-2-酮	Terpenoids	萜类	Ditepenoids	二萜	-	18497	21070	27248	135810	98895	72962	1.11204	0.0454227	0.0808588	4.60476	2.20313	up
mws0582	UPLC-MS/MS	C11H19N3O6S	S-(Methyl)glutathione	S-甲基谷胱甘肽	Amino acids and derivatives	氨基酸及其衍生物	Amino acids and derivatives	氨基酸及其衍生物	2922-56-7	637130	382370	219680	48300	42149	30499	1.10507	0.0915502	0.136201	0.0976033	-3.35693	down
pme3174	UPLC-MS/MS	C9H14N3O8P	Cytidine 5'-monophosphate(Cytidylic acid)	胞苷-5'-单磷酸	Nucleotides and derivatives	核苷酸及其衍生物	Nucleotides and derivatives	核苷酸及其衍生物	63-37-6	32666	50684	38597	155520	127970	151160	1.12872	0.00118353	0.0180823	3.56425	1.8336	up
pme3188	UPLC-MS/MS	C9H13N2O9P	Uridine 5'-monophosphate	尿苷 5'-单磷酸	Nucleotides and derivatives	核苷酸及其衍生物	Nucleotides and derivatives	核苷酸及其衍生物	58-97-9	278640	422850	235170	2025200	2481900	2343100	1.13677	0.00154196	0.0206811	7.31343	2.87055	up
MWSslk081	UPLC-MS/MS	C20H20O4	Bavachin	补骨脂二氢黄酮	Flavonoids	黄酮	Flavanones	二氢黄酮	19879-32-4	9	9	9	236320	218010	396340	1.15523	0.0376607	0.0730352	31506.3	14.9434	up
mws0983	UPLC-MS/MS	C20H39NO2	N-Oleoylethanolamine	油酰单乙醇胺	Alkaloids	生物碱	Alkaloids	生物碱	111-58-0	9	9	9	113980	111160	217250	1.15479	0.0517199	0.0872091	16384.8	14.0001	up
Hmhn003067	UPLC-MS/MS	C15H18O8	Phenylpropionic acid-O-β-D-glucopyranoside	苯基丙酸-O-β-D-吡喃葡萄糖苷	Phenolic acids	酚酸类	Phenolic acids	酚酸类	-	1846600	1086600	1395300	34331000	34737000	23186000	1.14629	0.0160103	0.0482505	21.3132	4.41367	up
Zmhn002301	UPLC-MS/MS	C15H18O8	p-Coumaric acid-4-O-glucoside	对香豆酸-4-O-葡萄糖苷	Phenolic acids	酚酸类	Phenolic acids	酚酸类	117405-48-8	1433100	865850	1138300	29495000	28457000	20904000	1.1486	0.0111772	0.0413481	22.9416	4.51989	up
Lmqn009304	UPLC-MS/MS	C19H18O5	Eucalyptin (5-Hydroxy-7,4'-dimethoxy-6,8-dimethylflavone)	桉树素	Flavonoids	黄酮	Flavones	黄酮	3122-88-1	9	9	9	41211	24046	23351	1.15499	0.0369749	0.072402	3281.78	11.6803	up
Lmsn000363	UPLC-MS/MS	C16H22O7	Raspberryketone glucoside	覆盆子苷	Phenolic acids	酚酸类	Phenolic acids	酚酸类	38963-94-9	935420	503780	638690	4372400	3940100	4123200	1.13484	4.24371e-05	0.00466038	5.98477	2.5813	up
pmn001691	UPLC-MS/MS	C18H32O5	9,12,13-Trihydroxy-10,15-octadecadienoic acid	9,12,13-三羟基-10,15-十八碳二烯酸	Lipids	脂质	Free fatty acids	游离脂肪酸	-	34636	53905	17624	1456500	2366200	1350500	1.1362	0.0344291	0.0696912	48.7279	5.60668	up
mws0884	UPLC-MS/MS	C10H12N5O6P	Cyclic 3',5'-Adenylic acid	环-3',5'-腺嘌呤核苷酸	Nucleotides and derivatives	核苷酸及其衍生物	Nucleotides and derivatives	核苷酸及其衍生物	60-92-4	373600	442760	209880	957500	816120	853450	1.04991	0.00517751	0.0352592	2.5599	1.35609	up
Hmqn003054	UPLC-MS/MS	C18H34O5	9,10,11-Trihydroxy-12-octadecenoic acid	9,10,11-三羟基-12-十八碳烯酸	Lipids	脂质	Free fatty acids	游离脂肪酸	61911-67-9	145830	133420	92910	779110	1042900	567570	1.12357	0.0377876	0.0732005	6.42084	2.68276	up
Lmbn003970	UPLC-MS/MS	C18H34O5	9,12,13-TriHOME; 9(S),12(S),13(S)-Trihydroxy-10(E)-octadecenoic acid	9(S),12(S),13(S)-三羟基-10(E)-十八烯酸	Lipids	脂质	Free fatty acids	游离脂肪酸	97134-11-7	5638.8	3225.3	6069.5	247160	27952	292490	1.04657	0.152757	0.200594	38.0084	5.24825	up
pmn001694	UPLC-MS/MS	C18H34O5	9,10,13-Trihydroxy-11-Octadecenoic Acid	9,10,13-三羟基-11-十八碳烯酸	Lipids	脂质	Free fatty acids	游离脂肪酸	29907-57-1	2351300	2115000	1304600	12427000	17199000	9640500	1.11983	0.0346377	0.0699523	6.80422	2.76643	up
pme3184	UPLC-MS/MS	C10H14N5O6P	2'-Deoxyadenosine-5'-monophosphate	2'-脱氧腺苷-5'-单磷酸	Nucleotides and derivatives	核苷酸及其衍生物	Nucleotides and derivatives	核苷酸及其衍生物	653-63-4	64489	75421	32792	466900	194320	275980	1.06691	0.0840118	0.127689	5.42669	2.44007	up
pmb0789	UPLC-MS/MS	C14H21NO8	Pyridoxine-5'-O-glucoside	吡哆醇-5'-O-葡萄糖苷	Others	其它类	Vitamin	维生素	-	178460	176810	59744	1562100	611180	743310	1.05176	0.1047	0.151405	7.02769	2.81305	up
Cmcp007926	UPLC-MS/MS	C20H28O4	Pinusolidic acid	松内酯酸	Terpenoids	萜类	Ditepenoids	二萜	40433-82-7	69307	85084	61288	9	9	9	1.15557	0.00932344	0.0406523	0.000125186	-12.9636	down
pmf0289	UPLC-MS/MS	C15H21N5O4	Riboprine	利波腺苷	Phenolic acids	酚酸类	Phenolic acids	酚酸类	7724-76-7	17444	18196	11262	139280	51183	128990	1.08272	0.0813979	0.124687	6.81107	2.76788	up
pmn001421	UPLC-MS/MS	C16H18O8	3-O-p-Coumaroylquinic acid	3-O-对香豆酰奎宁酸	Phenolic acids	酚酸类	Phenolic acids	酚酸类	87099-71-6	7397.5	566.25	2826	528320	2474800	1458900	1.11337	0.118528	0.165412	413.542	8.69189	up
pmb3068	UPLC-MS/MS	C16H18O8	1-O-p-Coumaroylquinic acid	1-O-对香豆酰奎宁酸	Phenolic acids	酚酸类	Phenolic acids	酚酸类	-	9	9	9	20816	77381	171260	1.14438	0.177246	0.227584	9979.89	13.2848	up
MWSmce310	UPLC-MS/MS	C21H22O4	Bergamottin	佛手柑素	Lignans and Coumarins	木脂素和香豆素	Coumarins	香豆素	7380-40-7	369880	474180	547800	41928	34265	29431	1.14824	0.0138406	0.0449501	0.0758869	-3.72	down
Hmcn004128	UPLC-MS/MS	C16H20O8	P-Methoyxcinnamate glucoside	对甲氧基桂皮酸葡萄糖苷	Lignans and Coumarins	木脂素和香豆素	Coumarins	香豆素	-	982140	871700	741920	321950	139160	226260	1.07925	0.00244237	0.0249568	0.264805	-1.917	down
Xmgp006913	UPLC-MS/MS	C20H20O5	2,4,2',4'-tetrahydroxy-3'-prenylchalcone	2,4,2',4'-四羟基-3'-异戊烯基查尔酮	Flavonoids	黄酮	Chalcones	查耳酮	-	298560	262100	210010	832170	973560	648570	1.11605	0.0208358	0.0534397	3.18463	1.67113	up
Lman002731	UPLC-MS/MS	C15H18O9	Grevilloside F	银桦苷 F	Phenolic acids	酚酸类	Phenolic acids	酚酸类	1094004-50-8	158270	82418	52452	561140	563330	645900	1.09705	0.000330261	0.00879196	6.03933	2.59439	up
Lmyn000503	UPLC-MS/MS	C13H12O11	Mucic acid-1,4-lactone-2-O-gallate	粘酸-1,4-内酯-2-O-没食子酸酯	Phenolic acids	酚酸类	Phenolic acids	酚酸类	-	367180	458920	191790	726930	898110	787870	1.00037	0.0113402	0.0413481	2.3705	1.24519	up
mws1474	UPLC-MS/MS	C18H16O7	5,7-Dihydroxy-3',4',5'-trimethoxyflavone	5,7-二羟基-3',4',5'-三甲氧基黄酮	Flavonoids	黄酮	Flavones	黄酮	18103-42-9	3117	8970.2	8175.4	239960	60863	215550	1.09196	0.0981591	0.144323	25.484	4.67152	up
mws0609	UPLC-MS/MS	C10H12N5O7P	Guanosine 3',5'-cyclic monophosphate	鸟苷 3',5'-环单磷酸	Nucleotides and derivatives	核苷酸及其衍生物	Nucleotides and derivatives	核苷酸及其衍生物	7665-99-8	168140	357200	88252	2003700	4292300	3145300	1.09924	0.0450915	0.0806779	15.3869	3.94363	up
Cmrn002988	UPLC-MS/MS	C16H26O8	Kankanoside A	甘蓝苷 A	Terpenoids	萜类	Monoterpenoids	倍萜	-	84168	53796	114180	2019	5282.5	6125.6	1.11645	0.044147	0.0801547	0.0532517	-4.23103	down
pmp001047	UPLC-MS/MS	C16H26O8	Jasminoside G	茉莉花苷 G	Terpenoids	萜类	Monoterpenoids	倍萜	871589-35-4	20365	9	9	1983100	1015500	3304600	1.02282	0.0873817	0.131334	309.238	8.27257	up
pmb0981	UPLC-MS/MS	C10H14N5O7P	Adenosine 5'-monophosphate	腺苷-5'-单磷酸	Nucleotides and derivatives	核苷酸及其衍生物	Nucleotides and derivatives	核苷酸及其衍生物	61-19-8	2445900	4321600	3591200	515090	562250	478930	1.13794	0.0326956	0.0679033	0.150238	-2.73468	down
Lmhp011562	UPLC-MS/MS	C21H36O4	1-α-Linolenoyl-glycerol	1-α-亚麻酸甘油酯	Lipids	脂质	Glycerol ester	甘油酯	-	3538.9	4835.6	2680.5	277210	226640	290650	1.15211	0.00548331	0.035894	71.8679	6.16728	up
Lmhp011388	UPLC-MS/MS	C21H36O4	2-α-Linolenoyl-glycerol	2-α-亚麻酸甘油酯	Lipids	脂质	Glycerol ester	甘油酯	55268-58-1	11286	9194.8	11834	147270	230850	209950	1.14828	0.0178016	0.0494896	18.1982	4.18572	up
MWSmce024	UPLC-MS/MS	C16H18O9	Scopoletin-7-O-glucoside (Scopolin)	东莨菪内酯-7-O-葡萄糖苷 (东莨菪苷)	Lignans and Coumarins	木脂素和香豆素	Coumarins	香豆素	531-44-2	380110	54900	192180	24599000	34849000	26405000	1.1288	0.0120835	0.0420411	136.885	7.09682	up
pme1816	UPLC-MS/MS	C16H18O9	Neochlorogenic acid (5-O-Caffeoylquinic acid)*	新绿原酸 (5-O-咖啡酰奎宁酸)*	Phenolic acids	酚酸类	Phenolic acids	酚酸类	906-33-2	10138	10554	26478	263780	333570	458500	1.12698	0.0266304	0.0602262	22.3839	4.48439	up
mws2108	UPLC-MS/MS	C16H18O9	Cryptochlorogenic acid (4-O-Caffeoylquinic acid)*	隐绿原酸 (4-O-咖啡酰奎宁酸)*	Phenolic acids	酚酸类	Phenolic acids	酚酸类	905-99-7	544310	114300	1493700	8665800	11272000	9678300	1.03695	0.00161481	0.0211733	13.7601	3.78242	up
mws0178	UPLC-MS/MS	C16H18O9	Chlorogenic acid (3-O-Caffeoylquinic acid)*	绿原酸 (3-O-咖啡酰奎宁酸)*	Phenolic acids	酚酸类	Phenolic acids	酚酸类	327-97-9	621150	115600	1565700	8322700	9626900	9887600	1.0252	0.000209534	0.00735535	12.0903	3.59577	up
Lmgp008453	UPLC-MS/MS	C20H18O6	Albanin A	Albanin A	Flavonoids	黄酮	Flavones	黄酮	73343-42-7	84372	159770	194130	9	9	9	1.15478	0.0458742	0.0812347	6.16056e-05	-13.9866	down
Lmhp112042	UPLC-MS/MS	C21H38O4	1-Linoleoylglycerol	1-亚油酰甘油酯	Lipids	脂质	Glycerol ester	甘油酯	2277-28-3	36799	20815	34653	367340	311460	370190	1.1431	0.0021561	0.0233844	11.3691	3.50704	up
Zmhn002422	UPLC-MS/MS	C16H20O9	1-O-Feruloyl-β-D-glucose	1-O-阿魏酰-β-D-葡萄糖	Phenolic acids	酚酸类	Phenolic acids	酚酸类	7196-71-6	3652.9	1525.4	2740.1	232960	213110	340130	1.14734	0.0223293	0.0551021	99.2877	6.63354	up
pmb3056	UPLC-MS/MS	C16H20O9	Homovanilloylquinic acid	高香草酰奎宁酸	Phenolic acids	酚酸类	Phenolic acids	酚酸类	-	9	9	9	7556.7	14908	49079	1.1438	0.203422	0.253664	2649.77	11.3716	up
Hmmn002544	UPLC-MS/MS	C16H20O9	Ferulic acid-4-O-glucoside	阿魏酸-4-O-葡萄糖苷	Phenolic acids	酚酸类	Phenolic acids	酚酸类	117405-51-3	30870	4904.7	85809	556990	776230	902710	1.03484	0.015852	0.0481847	18.39	4.20085	up
Zmhn003082	UPLC-MS/MS	C15H18O10	5-O-Galloyl-methyl quinine ester	5-O-没食子酰-奎宁酸甲酯	Phenolic acids	酚酸类	Phenolic acids	酚酸类	-	27079	37123	13790	69160	62080	67955	1.00354	0.0189094	0.0511924	2.55404	1.35278	up
Zmdp006307	UPLC-MS/MS	C20H22O6	sanshodiol	sanshodiol	Lignans and Coumarins	木脂素和香豆素	Lignans	木脂素	-	2795200	8154800	10299000	1561400	685930	1357800	1.0094	0.116877	0.163368	0.169661	-2.55927	down
Hmlp003129	UPLC-MS/MS	C20H22O6	Matairesinol	罗汉松树脂醇	Lignans and Coumarins	木脂素和香豆素	Lignans	木脂素	580-72-3	2563800	8264400	10125000	1438700	592320	1283200	1.0008	0.120898	0.16792	0.158172	-2.66043	down
Lmdn004267	UPLC-MS/MS	C20H22O6	Epipinoresinol	表松脂醇	Lignans and Coumarins	木脂素和香豆素	Lignans	木脂素	24404-50-0	30306	20597	34880	14191000	1358500	6500200	1.11755	0.188563	0.236985	257.04	8.00585	up
mws0097	UPLC-MS/MS	C20H22O6	Pinoresinol	松脂醇	Lignans and Coumarins	木脂素和香豆素	Lignans	木脂素	487-36-5	63660	37356	37499	14484000	1484900	6897800	1.11319	0.182204	0.23198	165.085	7.36706	up
pmb3107	UPLC-MS/MS	C15H20O10	Glucosyringic Acid	葡萄糖基丁香酸	Phenolic acids	酚酸类	Phenolic acids	酚酸类	-	985480	583790	739800	12649000	9266800	13205000	1.14644	0.0118552	0.0417426	15.2099	3.92694	up
Lmyn000716	UPLC-MS/MS	C13H14O12	2-O-Galloylmucic acid	2-O-没食子酰基粘酸	Phenolic acids	酚酸类	Phenolic acids	酚酸类	-	2018300	760040	2813700	9883600	11119000	13222000	1.06723	0.00244312	0.0249568	6.12024	2.61359	up
mws5040	UPLC-MS/MS	C12H21O11Na	Turanose	松二糖	Others	其它类	Saccharides and Alcohols	糖及醇类	547-25-1	908090	1515400	813920	45131	81683	147300	1.10546	0.0438775	0.079889	0.0846708	-3.56199	down
Smjp005798	UPLC-MS/MS	C21H16O6	justicidin B	爵床脂素 B	Lignans and Coumarins	木脂素和香豆素	Lignans	木脂素	82001-16-9	26157	41265	90598	9	9	9	1.15249	0.113691	0.16006	0.000170864	-12.5149	down
Lmgp003270	UPLC-MS/MS	C16H16O10	Scopoletin-7-O-glucuronide	东莨菪内酯-7-O-葡萄糖醛酸苷	Lignans and Coumarins	木脂素和香豆素	Coumarins	香豆素	132752-65-9	149380	67346	307090	9672100	10487000	12562000	1.13128	0.00609286	0.0364483	62.4668	5.96502	up
pmb0752	UPLC-MS/MS	C17H20O9	3-O-Feruloylquinic acid*	3-O-阿魏酰奎宁酸*	Phenolic acids	酚酸类	Phenolic acids	酚酸类	1899-29-2	26994	31724	114700	1715700	1988900	2369100	1.11999	0.00804145	0.038846	35.0235	5.13025	up
Lmgn003073	UPLC-MS/MS	C17H20O9	5-O-Feruloylquinic acid*	5-O-阿魏酰奎尼酸*	Phenolic acids	酚酸类	Phenolic acids	酚酸类	-	9	9	9	951930	1003700	1408700	1.15564	0.0161796	0.0483212	124605	16.927	up
pma3724	UPLC-MS/MS	C17H20O9	1-O-Feruloylquinic acid*	1-O-阿魏酰奎宁酸*	Phenolic acids	酚酸类	Phenolic acids	酚酸类	-	111030	75548	213560	8397800	8549700	10039000	1.14351	0.00330936	0.0283636	67.443	6.0756	up
Lmbp002309	UPLC-MS/MS	C17H22O9	Sinapaldehyde-4-O-Glucoside	芥子醛-4-O-葡萄糖苷	Phenolic acids	酚酸类	Phenolic acids	酚酸类	154461-65-1	4497600	2681000	3701000	19050	4993	21908	1.13671	0.0205346	0.0532585	0.00422359	-7.88731	down
Lmap001661	UPLC-MS/MS	C17H24O9	Grevilloside C	银桦苷 C	Phenolic acids	酚酸类	Phenolic acids	酚酸类	1094004-47-3	508980	749650	591520	73405	50420	65807	1.14434	0.0152143	0.0474732	0.102495	-3.28637	down
pmp000674	UPLC-MS/MS	C21H24O6	Phillygenin	连翘脂素	Lignans and Coumarins	木脂素和香豆素	Lignans	木脂素	487-39-8	75366	527350	217350	9	9	9	1.14934	0.177081	0.227584	3.29242e-05	-14.8905	down
Hmln003558	UPLC-MS/MS	C21H24O6	Arctigenin	牛蒡子苷元	Lignans and Coumarins	木脂素和香豆素	Lignans	木脂素	7770-78-7	183710	1225700	578610	882.21	9	9	1.09106	0.160967	0.210173	0.000452817	-11.1088	down
Lmzn001983	UPLC-MS/MS	C16H24O10	D-Threo-guaiacylglycerol-7-O-β-D-glucoside	D-苏式-愈创木基甘油-7-O-β-D-葡萄糖苷	Phenolic acids	酚酸类	Phenolic acids	酚酸类	-	264420	280670	398210	844850	1729500	1073000	1.07896	0.0732748	0.11495	3.86659	1.95106	up
pme3337	UPLC-MS/MS	C14H17N5O8	Succinyladenosine	琥珀酰腺苷	Nucleotides and derivatives	核苷酸及其衍生物	Nucleotides and derivatives	核苷酸及其衍生物	4542-23-8	7223200	5141400	4498000	3084500	2438000	2198900	1.05035	0.0544629	0.0909613	0.457901	-1.12689	down
Zmcp102801	UPLC-MS/MS	C17H20O10	Saikochromoside A	柴胡色原酮苷A	Others	其它类	Others	其它	-	14990	41617	15746	1105900	288270	1387600	1.09909	0.111317	0.157729	38.4472	5.26481	up
pme1286	UPLC-MS/MS	C14H20N6O5S	S-(5'-Adenosy)-L-homocysteine	S-(5-腺苷)-L-高半胱氨酸	Amino acids and derivatives	氨基酸及其衍生物	Amino acids and derivatives	氨基酸及其衍生物	979-92-0	14869	7131.7	10497	288210	347290	214880	1.14255	0.0188827	0.0511924	26.1674	4.7097	up
Zmhn002227	UPLC-MS/MS	C17H22O10	4-O-Glucosyl-sinapate	4-O-葡萄糖基芥子酸	Phenolic acids	酚酸类	Phenolic acids	酚酸类	-	830840	152250	310290	2642700	2390900	2330900	1.03701	0.00369584	0.0300629	5.694	2.50944	up
HJN003	UPLC-MS/MS	C17H22O10	1-O-Sinapoyl-D-glucose	1-O-芥子酰-D-葡萄糖	Phenolic acids	酚酸类	Phenolic acids	酚酸类	-	53885	28729	46414	1735600	2261000	2427800	1.149	0.00966392	0.0409664	49.7907	5.63781	up
Lmmp003215	UPLC-MS/MS	C19H30O8	Icariside B2	淫羊藿次苷 B2	Others	其它类	Others	其它	108906-51-0	37156	8507	7239	168230	146480	795700	1.03818	0.239397	0.289683	20.9899	4.39163	up
Cmdp003280	UPLC-MS/MS	C17H24O10	7-Dehydroxyzaluzioside	7-Dehydroxyzaluzioside	Terpenoids	萜类	Monoterpenoids	倍萜	-	16826	50706	49028	490420	538730	697740	1.11385	0.0114393	0.0415108	14.8155	3.88903	up
Lmzn001582	UPLC-MS/MS	C18H28O9	5'-Glucosyloxyjasmanic acid	5'-葡萄糖基氧代茉莉酸	Phenolic acids	酚酸类	Phenolic acids	酚酸类	-	2964800	4301300	3318300	455200	588470	1387900	1.05489	0.00692262	0.0378764	0.229731	-2.12198	down
pme2735	UPLC-MS/MS	C15H22N6O5S	S-Adenosyl-L-methionine	S-腺苷-L-蛋氨酸	Amino acids and derivatives	氨基酸及其衍生物	Amino acids and derivatives	氨基酸及其衍生物	29908-03-0	1530.6	2877.8	5259.8	217400	169330	146020	1.13587	0.0140289	0.0452272	55.1033	5.78407	up
Cmjn004337	UPLC-MS/MS	C18H26O10	Benzyl-(2''-O-xylosyl)glucoside	苄基-(2''-O-木糖基)葡萄糖苷	Phenolic acids	酚酸类	Phenolic acids	酚酸类	-	1196300	1235400	1277700	51998	105360	109050	1.13892	4.77747e-06	0.00100978	0.0718197	-3.79948	down
pme3007	UPLC-MS/MS	C9H14N2O12P2	Uridine 5'-diphosphate	尿苷 5'-二磷酸	Nucleotides and derivatives	核苷酸及其衍生物	Nucleotides and derivatives	核苷酸及其衍生物	27821-45-0	50408	54511	62780	16190	29955	20015	1.07793	0.00366483	0.0299493	0.394516	-1.34184	down
Hmhp002580	UPLC-MS/MS	C19H24O10	Methylpicraquassioside A	Methylpicraquassioside A	Lignans and Coumarins	木脂素和香豆素	Coumarins	香豆素	-	202830	135410	193890	43752	56371	71738	1.09547	0.0190673	0.0514612	0.322968	-1.63054	down
Lmhn001773	UPLC-MS/MS	C19H13NO10	Caffeoylnicotinoyltartaric acid	咖啡酰烟酰酒石酸	Phenolic acids	酚酸类	Phenolic acids	酚酸类	-	4627.7	4812	29025	255990	1110200	901470	1.08616	0.101627	0.148675	58.9543	5.88153	up
Smgp109120	UPLC-MS/MS	C23H28O7	epimagnolin	epimagnolin	Lignans and Coumarins	木脂素和香豆素	Lignans	木脂素	-	1153900	1369300	762620	9	9	9	1.15521	0.0252916	0.0593289	8.21713e-06	-16.8929	down
Hmcn002743	UPLC-MS/MS	C22H26O8	Lirioresinol A	鹅掌揪树脂醇 A	Lignans and Coumarins	木脂素和香豆素	Lignans	木脂素	-	15266	12353	77384	247460	288820	436590	1.04221	0.0259054	0.0599092	9.26516	3.21182	up
MWS20152	UPLC-MS/MS	C22H26O8	Syringaresinol	丁香树脂酚	Lignans and Coumarins	木脂素和香豆素	Lignans	木脂素	21453-71-4	3592.2	1521.5	16699	47807	51605	74450	1.00479	0.0113666	0.0413481	7.97068	2.9947	up
mws2523	UPLC-MS/MS	C12H23O14P	Trehalose 6-phosphate	海藻糖-6-磷酸	Others	其它类	Saccharides and Alcohols	糖及醇类	4484-88-2	66756	79626	49811	24216	33485	21029	1.06476	0.0303882	0.0647515	0.401289	-1.31729	down
Lmhp008337	UPLC-MS/MS	C19H40NO7P	LysoPE 14:0(2n isomer)	溶血磷脂酰乙醇胺 14:0(2n异构)	Lipids	脂质	LPE	溶血磷脂酰乙醇胺	-	24467	8830.2	11385	288120	210340	193750	1.12771	0.0156361	0.0479399	15.4919	3.95344	up
pmb0864	UPLC-MS/MS	C19H40NO7P	LysoPE 14:0	溶血磷脂酰乙醇胺 14:0	Lipids	脂质	LPE	溶血磷脂酰乙醇胺	-	29288	8783	18634	261470	199260	204190	1.11423	0.00596721	0.036405	11.726	3.55163	up
pme2117	UPLC-MS/MS	C10H15N5O10P2	Adenosine 5'-diphosphate	腺苷-5'-二磷酸	Nucleotides and derivatives	核苷酸及其衍生物	Nucleotides and derivatives	核苷酸及其衍生物	58-64-0	49205	48440	84486	12873	9861.8	12657	1.12173	0.0534386	0.0895058	0.194321	-2.36349	down
Cmbn003996	UPLC-MS/MS	C19H26O11	Regaloside G	王百合苷G	Phenolic acids	酚酸类	Phenolic acids	酚酸类	120601-64-1	8202.4	13167	10149	65528	59386	42160	1.1259	0.0196126	0.0522049	5.30084	2.40622	up
Lmhn002574	UPLC-MS/MS	C20H16O11	Caffeoyl(p-Hydroxybenzoyl)tartaric acid	咖啡酰对羟基苯甲酰酒石酸	Phenolic acids	酚酸类	Phenolic acids	酚酸类	-	2812	9	9	52488	44226	49864	1.00716	0.000843845	0.0154229	51.7943	5.69472	up
mws0919	UPLC-MS/MS	C21H20O10	Kaempferol-3-O-rhamnoside (Afzelin)(Kaempferin)	山奈酚-3-O-鼠李糖苷 (阿福豆苷)(番泻叶山奈苷)	Flavonoids	黄酮	Flavonols	黄酮醇	482-39-3	55633	325750	75112	59735000	68071000	67853000	1.13868	0.00175642	0.0217474	428.611	8.74353	up
Lmfn004036	UPLC-MS/MS	C20H18O11	Morin-3-O-lyxoside	桑色素-3-O-来苏糖苷	Flavonoids	黄酮	Flavonols	黄酮醇	-	37248	22006	4273.5	1303500	3807700	1918500	1.11024	0.0910985	0.135644	110.656	6.78994	up
mws4183	UPLC-MS/MS	C20H18O11	Quercetin-3-O-arabinoside (Guaijaverin)	槲皮素-3-O-阿拉伯糖苷(番石榴苷)	Flavonoids	黄酮	Flavonols	黄酮醇	22255-13-6	21075	16484	5731.2	864270	1904900	1090400	1.1333	0.0564991	0.0935616	89.1557	6.47826	up
Lmfn004065	UPLC-MS/MS	C20H18O11	Morin-3-O-arabinoside	桑色素-3-O-阿拉伯糖苷	Flavonoids	黄酮	Flavonols	黄酮醇	-	24382	27342	9760.2	1375500	4781400	2343700	1.1332	0.108942	0.154863	138.257	7.11121	up
mws2186	UPLC-MS/MS	C20H18O11	Avicularin(Quercetin-3-O-α-L-arabinofuranoside)	扁蓄苷(广寄生苷)	Flavonoids	黄酮	Flavonols	黄酮醇	572-30-5	54253	30794	22819	3735500	10493000	6031500	1.14285	0.0772445	0.119681	187.826	7.55325	up
HJN087	UPLC-MS/MS	C21H22O10	Naringenin-4'-O-glucoside	柚皮素-4'-O-葡萄糖苷	Flavonoids	黄酮	Flavones	黄酮	-	9	6753.2	9	162600	639730	372860	1.01647	0.106	0.152533	173.557	7.43927	up
mws1179	UPLC-MS/MS	C21H22O10	Naringenin-7-O-glucoside (Prunin)	柚皮素-7-O-葡萄糖苷 (樱桃苷)	Flavonoids	黄酮	Flavanones	二氢黄酮	529-55-5	9	9	9	344970	621300	411330	1.15497	0.0313558	0.0660578	51022.2	15.6388	up
HJN090	UPLC-MS/MS	C21H22O10	Butin-7-O-glucoside	紫铆素-7-O-葡萄糖苷	Flavonoids	黄酮	Flavones	黄酮	-	9	9	9	206630	594140	333150	1.1534	0.0802915	0.123394	41997	15.358	up
Hmcp002316	UPLC-MS/MS	C21H20O11	Isorhamnetin-3-O-arabinoside	异鼠李素-3-O-阿拉伯糖苷	Flavonoids	黄酮	Flavonols	黄酮醇	-	18112	17958	3729	6251100	11853000	6201600	1.13967	0.0497868	0.0850815	610.711	9.25435	up
mws0045	UPLC-MS/MS	C21H20O11	Quercetin-3-O-rhamnoside(Quercitrin)	槲皮素-3-O-鼠李糖苷(槲皮苷)	Flavonoids	黄酮	Flavonols	黄酮醇	522-12-3	9	9	9	272760	519890	361890	1.15483	0.0334933	0.0686522	42760.7	15.384	up
MWSHY0136	UPLC-MS/MS	C21H20O11	Kaempferol-3-O-glucoside (Astragalin)	山奈酚-3-O-葡萄糖苷(紫云英苷)	Flavonoids	黄酮	Flavonols	黄酮醇	480-10-4	60794	196000	22794	22095000	48152000	21270000	1.12816	0.0748847	0.117057	327.328	8.35459	up
mws0913	UPLC-MS/MS	C21H20O11	Kaempferol-3-O-galactoside (Trifolin)	山奈酚-3-O-半乳糖苷(三叶豆苷)	Flavonoids	黄酮	Flavonols	黄酮醇	23627-87-4	8772	18550	3104.5	508240	241580	495510	1.11127	0.0427058	0.0787346	40.9291	5.35506	up
pmn001716	UPLC-MS/MS	C21H20O11	Carthamone	醌式红花苷	Flavonoids	黄酮	Chalcones	查耳酮	86579-00-2	9	2898	9	216260	110840	215570	1.03878	0.0357845	0.0709351	186.101	7.53994	up
MWS20150	UPLC-MS/MS	C21H20O11	Luteolin-7-O-glucoside (Cynaroside)	木犀草素-7-O-葡萄糖苷 (木犀草苷)	Flavonoids	黄酮	Flavones	黄酮	5373-11-5	19856	75634	14566	289980	537930	382070	1.06976	0.0297907	0.0637542	10.9942	3.45867	up
Hmpp003270	UPLC-MS/MS	C21H20O11	Luteolin-4'-O-glucoside	木犀草素-4'-O-葡萄糖苷	Flavonoids	黄酮	Flavones	黄酮	6920-38-3	47697	200220	70334	18824000	38039000	19421000	1.13769	0.0568093	0.0938983	239.698	7.90507	up
mws0089	UPLC-MS/MS	C21H20O11	Kaempferol-7-O-glucoside	山奈酚-7-O-葡萄糖苷	Flavonoids	黄酮	Flavonols	黄酮醇	16290-07-6	3686	29169	3615.1	308040	348370	492020	1.08761	0.0199793	0.0524681	31.4896	4.9768	up
mws1361	UPLC-MS/MS	C21H22O11	Taxifolin-3-O-rhamnoside (Astilbin)	花旗松素-3-O-葡萄糖苷(落新妇苷)	Flavonoids	黄酮	Flavanonols	二氢黄酮醇	29838-67-3	9	9	2064	85030	175260	117170	1.04076	0.0416765	0.0777236	181.297	7.50221	up
MWS20145	UPLC-MS/MS	C21H22O11	Eriodictyol-7-O-glucoside	圣草酚-7-O-葡萄糖苷	Flavonoids	黄酮	Flavanones	二氢黄酮	38965-51-4	11861	9056.6	19885	629840	1546500	551950	1.13329	0.107031	0.153638	66.8656	6.06319	up
HJN086	UPLC-MS/MS	C21H22O11	Eriodictyol-3'-O-glucoside	圣草酚-3'-O-葡萄糖苷	Flavonoids	黄酮	Flavanones	二氢黄酮	-	9	9	9	368320	860560	307670	1.15341	0.0996716	0.146179	56909.3	15.7964	up
Lmmn004625	UPLC-MS/MS	C21H22O11	Dihydrokaempferol-7-O-glucoside	二氢山奈酚-7-O-葡萄糖苷	Flavonoids	黄酮	Flavanonols	二氢黄酮醇	-	4672.2	9	9	282030	1052800	551470	1.04721	0.108872	0.154863	402.179	8.65169	up
MWS5083	UPLC-MS/MS	C17H21N4O9P	Flavin Single Nucleotide(FMN)	黄素单核苷酸(FMN)	Nucleotides and derivatives	核苷酸及其衍生物	Nucleotides and derivatives	核苷酸及其衍生物	6184-17-4	53720	26766	39544	114320	86466	111370	1.05895	0.00580263	0.036405	2.60065	1.37887	up
Lmdn006811	UPLC-MS/MS	C30H48O3	Soyasapogenol E	大豆皂醇 E	Terpenoids	萜类	Triterpene	三萜	6750-59-0	9	9	9	75089	28272	67720	1.15361	0.0592585	0.0969448	6336.33	12.6294	up
mws4053	UPLC-MS/MS	C30H48O3	Ursolic acid	熊果酸	Terpenoids	萜类	Triterpene	三萜	77-52-1	9	9	9	42707	157670	95430	1.15116	0.0972739	0.143261	10955.8	13.4194	up
pmn001700	UPLC-MS/MS	C30H48O3	24,30-Dihydroxy-12(13)-enolupinol	24,30-二羟基-12(13)烯羽扇豆醇	Terpenoids	萜类	Triterpene	三萜	-	2258	729.15	1537.3	60776	34471	57471	1.13277	0.0266339	0.0602262	33.7539	5.07698	up
pmb0464	UPLC-MS/MS	C16H27NO14	L-Aspartic acid-O-diglucoside	L-天冬氨酸-O-二葡萄糖苷	Amino acids and derivatives	氨基酸及其衍生物	Amino acids and derivatives	氨基酸及其衍生物	-	25755	35962	31696	895410	1797400	1768100	1.14498	0.0389039	0.0746205	47.7547	5.57757	up
mad2085	UPLC-MS/MS	C22H18O11	Caffeoyl-p-coumaroyltartaric acid	咖啡酰对香豆酰酒石酸	Phenolic acids	酚酸类	Phenolic acids	酚酸类	-	9	9	9	56982	40482	225720	1.14867	0.210374	0.260485	11969.8	13.5471	up
mws4167	UPLC-MS/MS	C21H18O12	Luteolin-7-O-glucuronide	木犀草素-7-O-葡萄糖醛酸苷	Flavonoids	黄酮	Flavones	黄酮	29741-10-4	5832	53838	23044	30487000	31726000	43322000	1.13744	0.0132532	0.0441282	1275.9	10.3173	up
Lmzn001894	UPLC-MS/MS	C21H18O12	Kaempferol-3-O-glucuronide	山奈酚-3-O-葡萄糖醛酸苷	Flavonoids	黄酮	Flavonols	黄酮醇	22688-78-4	9	25464	23236	27173000	21854000	33772000	1.01049	0.01526	0.0474732	1699.87	10.7312	up
MWSHY0035	UPLC-MS/MS	C21H18O12	Scutellarein-7-O-glucuronide (Scutellarin)	野黄芩素-7-O-葡萄糖醛酸苷 (野黄芩苷)	Flavonoids	黄酮	Flavones	黄酮	27740-01-8	15682	62825	23856	32974000	32569000	42757000	1.14756	0.00841933	0.0396779	1058	10.0471	up
pmp000579	UPLC-MS/MS	C22H22O11	Diosmetin-7-O-galactoside	香叶木素-7-O-半乳糖苷	Flavonoids	黄酮	Flavones	黄酮	-	7599.2	16670	7251.5	3374700	3138100	3417400	1.15093	0.000682837	0.0148013	315.037	8.29938	up
Lmjp003655	UPLC-MS/MS	C22H22O11	6-C-MethylKaempferol-3-glucoside	6-甲基山奈酚-3-O-葡萄糖苷	Flavonoids	黄酮	Flavones	黄酮	-	5360.5	6717.1	3413.6	3142200	3207500	3720500	1.15391	0.00296278	0.0275429	650.059	9.34443	up
Hmmp004965	UPLC-MS/MS	C22H22O11	Diosmetin-7-O-glucoside	香叶木素-7-O-葡萄糖苷	Flavonoids	黄酮	Flavones	黄酮	20126-59-4	4544.8	7191.8	5415.1	3063300	3602400	3577300	1.15441	0.00264499	0.0257471	597.2	9.22207	up
Hmgp002189	UPLC-MS/MS	C22H22O11	Hispidulin-7-O-Glucoside	高车前素-7-O-葡萄糖苷	Flavonoids	黄酮	Flavones	黄酮	17680-84-1	4903.9	7567.5	3236.6	2791200	3400300	3599000	1.15241	0.00551586	0.035894	623.281	9.28374	up
pmp001309	UPLC-MS/MS	C21H20O12	6-Hydroxykaempferol-7-O-glucoside	6-羟基山奈酚-7-O-葡萄糖苷	Flavonoids	黄酮	Flavonols	黄酮醇	-	16861	9264.3	74106	1236700	891890	201210	1.02902	0.134077	0.18177	23.2442	4.5388	up
Lmdp003286	UPLC-MS/MS	C21H20O12	Isohyperoside	异金丝桃苷	Flavonoids	黄酮	Flavonols	黄酮醇	35589-21-0	9669.5	110050	45248	20851000	34428000	20329000	1.12594	0.0320642	0.0671476	458.321	8.84021	up
mws0061	UPLC-MS/MS	C21H20O12	Quercetin-3-O-galactoside (Hyperin)	槲皮素-3-O-半乳糖苷 (金丝桃苷)	Flavonoids	黄酮	Flavonols	黄酮醇	482-36-0	230130	1202100	793340	46790000	69636000	49222000	1.12499	0.0171094	0.0493617	74.4295	6.2178	up
Smgp004575	UPLC-MS/MS	C21H20O12	Quercetin-5-O-β-D-glucoside	槲皮素-5-O-β-D-葡萄糖苷	Flavonoids	黄酮	Flavonols	黄酮醇	-	47340	73899	54213	18662000	31213000	19685000	1.15236	0.0289626	0.0627567	396.462	8.63104	up
mws1329	UPLC-MS/MS	C21H20O12	Quercetin-7-O-glucoside	槲皮素-7-O-葡萄糖苷	Flavonoids	黄酮	Flavonols	黄酮醇	491-50-9	80446	520050	442500	21944000	34389000	23949000	1.11429	0.0205659	0.0532585	76.9725	6.26627	up
mws0091	UPLC-MS/MS	C21H20O12	Quercetin-3-O-glucoside (Isoquercitrin)	槲皮素-3-O-葡萄糖苷(异槲皮苷)	Flavonoids	黄酮	Flavonols	黄酮醇	482-35-9	131370	845030	607750	27730000	45747000	35224000	1.11487	0.0206126	0.0532585	68.6179	6.10051	up
pme1598	UPLC-MS/MS	C22H24O11	Hesperetin-5-O-glucoside	橙皮素-5-O-葡萄糖苷	Flavonoids	黄酮	Flavanonols	二氢黄酮醇	69651-80-5	78947	592850	318210	23586000	32251000	24273000	1.117	0.0107675	0.0411633	80.9186	6.3384	up
pmd0130	UPLC-MS/MS	C22H46NO7P	LysoPC 14:0	溶血磷脂酰胆碱 14:0	Lipids	脂质	LPC	溶血磷脂酰胆碱	20559-16-4	256620	224090	157760	3698400	3997100	2846700	1.14738	0.0103133	0.0410063	16.5117	4.04541	up
HJAP154	UPLC-MS/MS	C23H16O11	Galloylisorhamnetin	没食子酰异鼠李素	Flavonoids	黄酮	Flavonols	黄酮醇	-	9	9	9	40527	10709	61338	1.14731	0.125209	0.172543	4169.41	12.0256	up
Hmjn008136	UPLC-MS/MS	C30H46O4	Camaldulenic acid	脱氢山楂酸	Terpenoids	萜类	Triterpene	三萜	71850-15-2	32973	28527	37872	691790	471330	397390	1.14602	0.0313155	0.066052	15.7037	3.97303	up
pmn001704	UPLC-MS/MS	C30H46O4	2,3-Dihydroxy-5(6),12(13)-diene-ursolic acid	2,3-二羟基-5(6),12(13)-二烯熊果酸	Terpenoids	萜类	Triterpene	三萜	-	9	9	9	29533	21130	15696	1.15477	0.0315759	0.0663623	2457.74	11.2631	up
Lmsn012627	UPLC-MS/MS	C30H46O4	2α,3α-Dihydroxyurs-12,18-dien-28-oic acid	2α,3α-二羟基熊果-12,18-二烯-28-酸	Terpenoids	萜类	Triterpene	三萜	-	9	9	9	29901	19453	15734	1.15475	0.0361734	0.0714121	2410.67	11.2352	up
Lmmn009932	UPLC-MS/MS	C31H50O3	Ambolic acid	阿波醇酸	Terpenoids	萜类	Triterpene	三萜	13878-93-8	67742	35918	36369	134420	108010	96780	1.03798	0.0124667	0.0426978	2.42243	1.27645	up
Zmhn002508	UPLC-MS/MS	C21H28O12	4-p-Cumaroyl-rhamnosyl-(1→6)-D-glucose	4-对香豆酰鼠李糖基-(1→6)-D-葡萄糖	Phenolic acids	酚酸类	Phenolic acids	酚酸类	-	7239	2741.5	12057	57910	32421	155070	1.02136	0.18392	0.233319	11.1356	3.47711	up
Lmzn006169	UPLC-MS/MS	C30H48O4	Pomolic acid	坡模酸	Terpenoids	萜类	Triterpene	三萜	13849-91-7	1066400	1703900	568650	28468000	27181000	17026000	1.12794	0.022888	0.0560781	21.7658	4.44399	up
Lmzn206284	UPLC-MS/MS	C30H48O4	Terminic acid	Terminic acid	Terpenoids	萜类	Triterpene	三萜	-	9	9	9	27438000	26979000	17015000	1.15559	0.0197914	0.0522911	2.64563e+06	21.3352	up
pmn001705	UPLC-MS/MS	C30H48O4	3,24-Dihydroxy-17,21-semiacetal-12(13)oleanolic fruit	3,24-二羟基-17,21-半缩醛基-12(13)齐墩果	Terpenoids	萜类	Triterpene	三萜	-	1106700	1673800	664540	29262000	26441000	16571000	1.13253	0.0264142	0.0601942	20.9791	4.39088	up
Lmsn012425	UPLC-MS/MS	C30H48O4	Rubusic acid (3β,7α-Dihydroxyolean-12-en-28-oic acid)	3β,7α-二羟基齐墩果-12-烯-28-酸	Terpenoids	萜类	Triterpene	三萜	23984-26-1	344240	417840	366910	38958000	36307000	22625000	1.15195	0.0237435	0.0568355	86.7058	6.43806	up
MWSmce560	UPLC-MS/MS	C30H48O4	23-Hydroxybetulinic acid	23-羟基白桦脂酸	Terpenoids	萜类	Triterpene	三萜	85999-40-2	657.05	1802	1677.2	34716	15853	16199	1.10785	0.0782103	0.120858	16.1422	4.01276	up
pmb1912	UPLC-MS/MS	C20H23N7O7	10-Formyltetrahydrofolic Acid	10-甲酰四氢叶酸	Alkaloids	生物碱	Alkaloids	生物碱	2800-34-2	2750600	1690700	1606900	515830	519610	494760	1.11768	0.0548015	0.0914399	0.253001	-1.98279	down
mws1714	UPLC-MS/MS	C22H18O12	Chicoric Acid	菊苣酸	Phenolic acids	酚酸类	Phenolic acids	酚酸类	70831-56-0	1646000	1716100	1666300	9	17224	9	1.02816	5.55499e-05	0.00466038	0.00342892	-8.18803	down
Lmtn001569	UPLC-MS/MS	C20H29NO12	2-Glucosyl-glucosyloxy-2-phenylacetic acid amide	2-葡糖基-葡萄糖-2-苯基乙酸酰胺	Alkaloids	生物碱	Alkaloids	生物碱	-	12747	10440	7586.8	25385	32668	38275	1.0973	0.0171388	0.0493655	3.1302	1.64625	up
Lmhp008589	UPLC-MS/MS	C23H42NO7P	LysoPE 18:3(2n isomer)	溶血磷脂酰乙醇胺 18:3(2n异构)	Lipids	脂质	LPE	溶血磷脂酰乙醇胺	-	18026	2841.3	12669	791300	560860	611760	1.11788	0.0113453	0.0413481	58.561	5.87187	up
Hmjp003123	UPLC-MS/MS	C21H18O13	Quercetin-5-O-glucuronide	槲皮素-5-O-葡萄糖醛酸苷	Flavonoids	黄酮	Flavonols	黄酮醇	-	39230	120930	58562	2126400	2177300	1250400	1.1262	0.026771	0.0604005	25.3934	4.66638	up
Hmcp002207	UPLC-MS/MS	C22H22O12	Isorhamnetin-7-O-glucoside (Brassicin)	异鼠李素-7-O-葡萄糖苷 (蔓菁苷)	Flavonoids	黄酮	Flavonols	黄酮醇	6743-96-0	273590	238700	34929	14401000	15452000	11922000	1.1129	0.00555642	0.0359386	76.3406	6.25438	up
Lmjp003044	UPLC-MS/MS	C22H22O12	Isorhamnetin-3-O-Glucoside	异鼠李素-3-O-葡萄糖苷	Flavonoids	黄酮	Flavonols	黄酮醇	5041-82-7	296750	257600	51421	13541000	15141000	12776000	1.12244	0.00236343	0.0245713	68.4384	6.09673	up
Lmjp002906	UPLC-MS/MS	C22H22O12	Rhamnetin-3-O-Glucoside	鼠李素-3-O-葡萄糖苷	Flavonoids	黄酮	Flavonols	黄酮醇	27875-34-9	313040	279730	34054	14729000	16513000	12719000	1.10484	0.00546473	0.035894	70.1329	6.13202	up
Hmgp002036	UPLC-MS/MS	C22H22O12	Nepetin-7-O-glucoside(Nepitrin)	泽兰黄酮-7-O-葡萄糖苷(假荆芥属苷)	Flavonoids	黄酮	Flavones	黄酮	569-90-4	30727	94329	49722	1344000	621950	490450	1.09586	0.102475	0.149666	14.0544	3.81295	up
Hmgp002148	UPLC-MS/MS	C22H22O12	Nepetin-7-O-alloside	泽兰黄酮-7-O-阿洛糖苷	Flavonoids	黄酮	Flavones	黄酮	-	275230	255800	32851	12642000	15058000	12218000	1.10796	0.00427196	0.0320762	70.7915	6.1455	up
Lmpp003296	UPLC-MS/MS	C21H19O13+	Delphinidin-3-O-glucuronide	飞燕草素-3-O-葡萄糖醛酸苷	Flavonoids	黄酮	Anthocyanidins	花青素	-	35924	130120	57515	21381000	19715000	24835000	1.14564	0.00469352	0.0336592	294.915	8.20416	up
pmb2260	UPLC-MS/MS	C23H46NO7P	LysoPC 15:1	溶血磷脂酰胆碱 15:1	Lipids	脂质	LPC	溶血磷脂酰胆碱	-	77361	31888	32740	203240	202760	245220	1.08702	0.0012004	0.0180988	4.58641	2.19737	up
Lmln001856	UPLC-MS/MS	C21H20O13	5,7-Dihydroxy-4-oxo-2-(3,4,5-trihydroxyphenyl)-4H-chromen-3-yl-alloside	5,7-二羟基-4-氧代-2-(3,4,5-三羟基苯基)-4H-色烯-3-基-阿洛糖苷	Others	其它类	Others	其它	-	29889	576830	28906	9	9	9	1.12943	0.365464	0.409255	4.24779e-05	-14.5229	down
pmb2319	UPLC-MS/MS	C23H48NO7P	LysoPC 15:0	溶血磷脂酰胆碱 15:0	Lipids	脂质	LPC	溶血磷脂酰胆碱	108273-89-8	2372300	1229800	1071100	3348100	3783800	3193600	1.00056	0.0294632	0.0634101	2.20951	1.14373	up
Lmhp009129	UPLC-MS/MS	C23H48NO7P	LysoPC 15:0(2n isomer)	溶血磷脂酰胆碱 15:0(2n异构)	Lipids	脂质	LPC	溶血磷脂酰胆碱	-	113240	36633	47322	350060	374150	226520	1.05646	0.0163175	0.0483519	4.82127	2.26941	up
pmb0883	UPLC-MS/MS	C23H48NO7P	LysoPE 18:0	溶血磷脂酰乙醇胺 18:0	Lipids	脂质	LPE	溶血磷脂酰乙醇胺	69747-55-3	77037	23186	56278	312930	292940	210750	1.0618	0.00855908	0.0398894	5.21799	2.38349	up
Hmyn007081	UPLC-MS/MS	C22H43O9P	LysoPG 16:1	溶血磷脂酰甘油 16:1	Lipids	脂质	Glycerol ester	甘油酯	-	5827.4	5016.9	4379.1	1169200	924000	810190	1.15482	0.0118895	0.0417797	190.719	7.5753	up
Lmhp010254	UPLC-MS/MS	C27H34O8	Kadsuralignan J	日本南五味子木脂素 J	Lignans and Coumarins	木脂素和香豆素	Lignans	木脂素	-	22643	260740	50302	9	9	9	1.14172	0.277158	0.325331	8.09146e-05	-13.5932	down
Li512114	UPLC-MS/MS	C31H50O4	Corosolic Acid Methyl Ester	科罗索酸甲酯	Terpenoids	萜类	Triterpene	三萜	4518-70-1	614.01	514.45	686.72	99680	23728	60349	1.13683	0.109662	0.155635	101.233	6.66154	up
Lmmn003398	UPLC-MS/MS	C23H22O12	Kaempferol-3-O-(6''-acetyl)glucoside	山奈酚-3-O-(6''-O-乙酰)葡萄糖苷	Flavonoids	黄酮	Flavonols	黄酮醇	-	61979	171960	17502	2537100	880260	1388400	1.05735	0.0890454	0.133378	19.1129	4.25647	up
pmp001142	UPLC-MS/MS	C24H29NO10	Cimicifugamide A	升麻酰胺 A	Alkaloids	生物碱	Phenolamine	酚胺	-	158070	131910	117290	2267.3	5416.3	20782	1.06387	0.0029071	0.0273143	0.0698937	-3.83869	down
pma1303	UPLC-MS/MS	C24H46NO7P	LysoPC 16:2	溶血磷脂酰胆碱 16:2	Lipids	脂质	LPC	溶血磷脂酰胆碱	-	34193	19642	18429	138060	151180	134770	1.13033	7.99329e-05	0.00466038	5.86751	2.55275	up
pmb0863	UPLC-MS/MS	C24H46NO7P	LysoPC 16:2(2n isomer)	溶血磷脂酰胆碱 16:2(2n异构)	Lipids	脂质	LPC	溶血磷脂酰胆碱	-	26595	25961	17535	143140	134120	127710	1.1432	9.52092e-05	0.00522758	5.77777	2.53051	up
pmp001164	UPLC-MS/MS	C23H24O12	Iristectorin B	鸢尾新苷	Flavonoids	黄酮	Isoflavones	异黄酮	94396-09-5	9	9	9	883950	680360	782970	1.15591	0.00559509	0.0359386	86936.3	16.4077	up
pmp001270	UPLC-MS/MS	C24H48NO7P	LysoPC 16:1	溶血磷脂酰胆碱 16:1	Lipids	脂质	LPC	溶血磷脂酰胆碱	76790-27-7	311500	167390	239250	1675500	976890	1203400	1.1148	0.0323323	0.0674677	5.36913	2.42469	up
Lmhp008833	UPLC-MS/MS	C24H48NO7P	LysoPC 16:1(2n isomer)	溶血磷脂酰胆碱 16:1(2n异构)	Lipids	脂质	LPC	溶血磷脂酰胆碱	-	64294	62742	145480	778140	417270	490900	1.08818	0.0435505	0.0797065	6.18793	2.62946	up
Lmsn002937	UPLC-MS/MS	C22H22O13	1-O-Caffeoyl-6-O-galloyl-β-D-glucose	1-O-咖啡酰-6-O-没食子酰-β-D-葡萄糖	Phenolic acids	酚酸类	Phenolic acids	酚酸类	-	331070	113070	178350	9	9	9	1.15324	0.0847805	0.128413	4.33742e-05	-14.4928	down
pmb0855	UPLC-MS/MS	C24H50NO7P	LysoPC 16:0	溶血磷脂酰胆碱 16:0	Lipids	脂质	LPC	溶血磷脂酰胆碱	17364-16-8	7733300	7651600	6602500	17534000	21415000	15740000	1.12614	0.018982	0.0513098	2.48729	1.31457	up
pmd0132	UPLC-MS/MS	C24H50NO7P	LysoPC 16:0(2n isomer)	溶血磷脂酰胆碱 16:0(2n异构)	Lipids	脂质	LPC	溶血磷脂酰胆碱	-	1545300	675060	1028100	5856700	6797500	4666700	1.10606	0.00869992	0.0399155	5.33203	2.41469	up
Lmgp003989	UPLC-MS/MS	C25H22O11	Dicaffeoylshikimic acid	二咖啡酰基莽草酸	Phenolic acids	酚酸类	Phenolic acids	酚酸类	-	972440	264520	3789200	19528000	34199000	21451000	1.03433	0.0311269	0.065971	14.9573	3.90278	up
pmn001642	UPLC-MS/MS	C23H20O13	Kaempferol-3-O-(2''-O-acetyl)glucuronide	山奈酚-3-O-(2''-O-乙酰)葡萄糖醛酸苷	Flavonoids	黄酮	Flavonols	黄酮醇	-	50024	16170	69070	784360	499800	854030	1.10009	0.0234576	0.0567624	15.8075	3.98254	up
pmb3000	UPLC-MS/MS	C24H24O12	Chrysoeriol-7-O-(6''-acetyl)glucoside	金圣草黄素-7-O-(6''-乙酰)葡萄糖苷	Flavonoids	黄酮	Flavones	黄酮	-	594.59	1324.4	3109.8	316160	177080	228900	1.13316	0.0275979	0.0613015	143.601	7.16592	up
Lmsn002288	UPLC-MS/MS	C21H28O14	1-O-Caffeoyl-(6-O-glucosyl)-β-D-glucose	1-O-咖啡酰-6-O-葡萄糖基-β-D-葡萄糖	Phenolic acids	酚酸类	Phenolic acids	酚酸类	-	217700	112980	109810	4112300	3877700	3201300	1.14529	0.00514632	0.0351832	25.4065	4.66712	up
pme2125	UPLC-MS/MS	C18H32O16	Raffinose	棉子糖	Others	其它类	Saccharides and Alcohols	糖及醇类	512-69-6	232860	322240	432870	95259	115240	132420	1.07983	0.0609023	0.0989873	0.347095	-1.5266	down
mws1589	UPLC-MS/MS	C18H32O16	D-Panose	D-潘糖	Others	其它类	Saccharides and Alcohols	糖及醇类	33401-87-5	77350	104800	143020	40451	21772	49838	1.00794	0.0482938	0.083929	0.344623	-1.53691	down
Hmjp003546	UPLC-MS/MS	C30H48O6	Madecassic acid	羟基积雪草酸	Terpenoids	萜类	Triterpene	三萜	18449-41-7	32612	27460	533710	9	9	9	1.13221	0.359723	0.403082	4.54712e-05	-14.4247	down
pmp001141	UPLC-MS/MS	C25H31NO10	Cimicifugamide	升麻酰胺	Alkaloids	生物碱	Phenolamine	酚胺	-	25581	72481	18727	197350	137520	120370	1.0037	0.0206426	0.0532585	3.89797	1.96272	up
Lmhp008718	UPLC-MS/MS	C25H48NO7P	LysoPC 17:2	溶血磷脂酰胆碱 17:2	Lipids	脂质	LPC	溶血磷脂酰胆碱	-	82071	38945	48878	349170	371800	360650	1.12717	0.00027212	0.00810364	6.36644	2.67049	up
Lmhp010514	UPLC-MS/MS	C25H48NO7P	LysoPE 20:2(2n isomer)	溶血磷脂酰乙醇胺 20:2(2n异构)	Lipids	脂质	LPE	溶血磷脂酰乙醇胺	-	85926	21008	48745	368490	308760	216560	1.04957	0.0185174	0.0507747	5.74137	2.52139	up
Lmhp010757	UPLC-MS/MS	C25H48NO7P	LysoPE 20:2	溶血磷脂酰乙醇胺 20:2	Lipids	脂质	LPE	溶血磷脂酰乙醇胺	-	74845	18297	52065	358770	322480	233200	1.0568	0.0104912	0.0410063	6.29756	2.65479	up
Hmln002199	UPLC-MS/MS	C23H22O13	Quercetin-3-O-(6''-O-acetyl)galactoside	槲皮素-3-O-(6''-O-乙酰)半乳糖苷	Flavonoids	黄酮	Flavonols	黄酮醇	-	10508	37780	15274	14642000	12040000	12190000	1.14773	0.00422113	0.0319678	611.56	9.25635	up
pmb2406	UPLC-MS/MS	C25H52NO7P	LysoPC 17:0	溶血磷脂酰胆碱 17:0	Lipids	脂质	LPC	溶血磷脂酰胆碱	50930-23-9	18386	10041	21413	333610	348790	203730	1.13326	0.0256663	0.0596764	17.7795	4.15214	up
Lmhp010515	UPLC-MS/MS	C25H52NO7P	LysoPC 17:0(2n isomer)	溶血磷脂酰胆碱 17:0(2n异构)	Lipids	脂质	LPC	溶血磷脂酰胆碱	-	26151	19581	22101	346000	445510	210170	1.13758	0.044709	0.0805386	14.7669	3.88429	up
Lmhp009773	UPLC-MS/MS	C27H46O9	1-α-Linolenoyl-glycerol-3-O-glucoside	1-α-亚麻酸甘油酯-3-O-葡萄糖苷	Lipids	脂质	Glycerol ester	甘油酯	-	9	2065.6	9	58969	44299	47648	1.01987	0.00685295	0.037627	72.4304	6.17852	up
MWSmce346	UPLC-MS/MS	C25H24O12	1,3-O-Dicaffeoylquinic Acid (Cynarin)	1,3-O-双咖啡酰奎宁酸(洋蓟酸)	Phenolic acids	酚酸类	Phenolic acids	酚酸类	30964-13-7	2129600	840560	9076600	32161000	59589000	39801000	1.02742	0.0304514	0.0647737	10.92	3.44891	up
MWSmce328	UPLC-MS/MS	C25H24O12	Isochlorogenic acid C	异绿原酸 C	Phenolic acids	酚酸类	Phenolic acids	酚酸类	57378-72-0	2067400	809350	8922200	33268000	59833000	41427000	1.03049	0.0259785	0.0599689	11.4017	3.51118	up
Li512115	UPLC-MS/MS	C25H24O12	Isochlorogenic acid B	异绿原酸 B	Phenolic acids	酚酸类	Phenolic acids	酚酸类	14534-61-3	94454	17802	385340	3615200	6856400	4294700	1.05026	0.0389453	0.0746205	29.6753	4.89119	up
pmn001382	UPLC-MS/MS	C25H24O12	Isochlorogenic acid A	异绿原酸 A	Phenolic acids	酚酸类	Phenolic acids	酚酸类	2450-53-5	94643	28781	518790	3996900	5955900	3840100	1.0473	0.0191537	0.051536	21.4771	4.42473	up
Lmhp010334	UPLC-MS/MS	C27H48O9	2-Linoleoylglycerol-1-O-glucoside	2-亚油酰甘油酯-1-O-葡萄糖苷	Lipids	脂质	Glycerol ester	甘油酯	-	4930.4	7654	9378.8	20657	14759	23500	1.04542	0.0242919	0.0574837	2.68249	1.42357	up
pmb0865	UPLC-MS/MS	C26H48NO7P	LysoPC 18:3(2n isomer)	溶血磷脂酰胆碱 18:3(2n异构)	Lipids	脂质	LPC	溶血磷脂酰胆碱	-	91558	34301	93941	12156000	10752000	11536000	1.14654	0.0012375	0.0183566	156.706	7.29192	up
pmb0854	UPLC-MS/MS	C26H48NO7P	LysoPC 18:3	溶血磷脂酰胆碱 18:3	Lipids	脂质	LPC	溶血磷脂酰胆碱	-	145580	20713	73582	12161000	9964800	11079000	1.12983	0.00322939	0.0281719	138.425	7.11297	up
pmp001251	UPLC-MS/MS	C26H50NO7P	LysoPC 18:2(2n isomer)	溶血磷脂酰胆碱 18:2(2n异构)	Lipids	脂质	LPC	溶血磷脂酰胆碱	-	24357000	22015000	17876000	58443000	60093000	55575000	1.13754	0.00019374	0.00732114	2.70998	1.43828	up
Zmcp102703	UPLC-MS/MS	C26H32O11	saikolignanoside D	柴胡木脂素苷D	Lignans and Coumarins	木脂素和香豆素	Lignans	木脂素	-	1824900	1550700	1886900	9818000	9898400	9114100	1.15231	0.000203811	0.00732114	5.47848	2.45378	up
Cmsp003083	UPLC-MS/MS	C26H32O11	Dehydrodiconiferyl alcohol-4-O-glucoside	脱氢二十二烷醇-4-O-葡萄糖苷	Others	其它类	Others	其它	107870-88-2	1765200	1320400	1978300	10285000	10069000	8974400	1.14381	0.000488265	0.0112879	5.79166	2.53398	up
Lmsp003655	UPLC-MS/MS	C26H32O11	Dehydrodiconiferyl alcohol-gamma'-O-glucoside	脱氢二松柏醇-γ'-O-葡萄糖苷	Phenolic acids	酚酸类	Phenolic acids	酚酸类	-	1998900	1657700	1914100	12078000	9447900	9941900	1.15006	0.00784764	0.0388329	5.64881	2.49795	up
pmn001378	UPLC-MS/MS	C26H32O11	Pinoresinol-4-O-glucoside	松脂醇-4-O-葡萄糖苷	Lignans and Coumarins	木脂素和香豆素	Lignans	木脂素	41607-20-9	28794	23828	98756	4354800	3933000	3533700	1.13289	0.00341342	0.0287256	78.0926	6.28711	up
Lmmn002274	UPLC-MS/MS	C26H34O11	Isolariciresinol-9'-O-glucoside	异落叶松脂素-9'-O-葡萄糖苷	Lignans and Coumarins	木脂素和香豆素	Lignans	木脂素	63358-12-3	24005	43681	61799	112550	105250	120720	1.0127	0.0135665	0.0444708	2.61436	1.38646	up
Lmtn002596	UPLC-MS/MS	C26H34O11	Dihydrodehydrodiconiferyl alcohol-4-O-glucoside	二氢脱氢二松柏醇-4-O-葡萄糖苷	Lignans and Coumarins	木脂素和香豆素	Lignans	木脂素	-	39586	29566	36894	100270	119180	88524	1.12562	0.010767	0.0411633	2.90415	1.53812	up
Jmzn003343	UPLC-MS/MS	C26H34O11	Saikolignanoside A	Saikolignanoside A	Lignans and Coumarins	木脂素和香豆素	Lignans	木脂素	-	416100	127720	550280	3272100	4332000	2749800	1.07618	0.0166876	0.0489484	9.46339	3.24236	up
mws0126	UPLC-MS/MS	C26H54NO7P	LysoPC 18:0	溶血磷脂酰胆碱 18:0	Lipids	脂质	LPC	溶血磷脂酰胆碱	19420-57-6	1252600	1272800	1556600	6026300	8690700	6027000	1.13672	0.0234868	0.0567624	5.08182	2.34535	up
pmd0136	UPLC-MS/MS	C26H54NO7P	LysoPC 18:0(2n isomer)	溶血磷脂酰胆碱 18:0(2n异构)	Lipids	脂质	LPC	溶血磷脂酰胆碱	-	84869	44458	79417	540970	709080	355730	1.112	0.0429474	0.0790143	7.69258	2.94347	up
Lmtn003096	UPLC-MS/MS	C26H36O11	Secoisolariciresinol 4-O-glucoside	开环异落叶松脂酚-4-O-葡萄糖苷	Lignans and Coumarins	木脂素和香豆素	Lignans	木脂素	-	605680	232110	165210	4658500	5731300	4146400	1.11397	0.00675178	0.0374105	14.4927	3.85726	up
Lmjp003822	UPLC-MS/MS	C26H26O12	3,5-O-Dicaffeoylquinic Acid Methyl Ester	3,5-O-双咖啡酰奎宁酸甲酯	Phenolic acids	酚酸类	Phenolic acids	酚酸类	159934-13-1	70673	50967	469190	11952000	21957000	16025000	1.10745	0.0295704	0.0635149	84.515	6.40114	up
Zmcn005156	UPLC-MS/MS	C26H26O12	4,5-O-Dicaffeoylquinic Acid Methyl Ester	4,5-二咖啡酰奎宁酸甲酯	Phenolic acids	酚酸类	Phenolic acids	酚酸类	-	31197	34152	121030	8774200	14311000	15244000	1.13768	0.0242843	0.0574837	205.652	7.68406	up
Lmjp003731	UPLC-MS/MS	C26H26O12	3,4-O-Dicaffeoylquinic Acid Methyl Ester	3,4-O-双咖啡酰奎宁酸甲酯	Phenolic acids	酚酸类	Phenolic acids	酚酸类	-	75272	48479	454560	11071000	19853000	16765000	1.10785	0.0255388	0.0596764	82.4626	6.36567	up
MWStz043	UPLC-MS/MS	C26H26O12	3,4-Di-O-caffeoylquinic acid methyl ester	3,4-O-二咖啡酰基奎宁酸甲酯	Phenolic acids	酚酸类	Phenolic acids	酚酸类	114637-83-1	34607	18352	33197	4283500	8446600	7431200	1.14879	0.0333284	0.068409	234.009	7.87042	up
Lmhn003801	UPLC-MS/MS	C25H24O13	Feruloylsinapoyltartaric acid	阿魏酰芥子酰酒石酸	Phenolic acids	酚酸类	Phenolic acids	酚酸类	-	9	9	9	2781400	1359300	1190200	1.15506	0.0720294	0.113401	197441	17.5911	up
Lmbn001181	UPLC-MS/MS	C22H28O15	Fraxetin-7,8-di-O-glucoside	秦皮素-7,8-二-O-葡萄糖苷	Lignans and Coumarins	木脂素和香豆素	Coumarins	香豆素	-	89249	77030	32732	607260	413550	324590	1.08772	0.0397498	0.0752591	6.76043	2.75712	up
Lmhp007598	UPLC-MS/MS	C27H52NO7P	LysoPC 19:2(2n isomer)	溶血磷脂酰胆碱 19:2(2n异构)	Lipids	脂质	LPC	溶血磷脂酰胆碱	-	3519.8	5616.8	3826.5	86808	38244	183110	1.1036	0.146953	0.194618	23.7722	4.57121	up
Lmdp004892	UPLC-MS/MS	C24H22O14	Kaempferol-3-O-(6''-malonyl)galactoside	山奈酚-3-O-(6''-丙二酰)半乳糖苷	Flavonoids	黄酮	Flavonols	黄酮醇	-	189590	417470	40453	4055100	4770200	5786200	1.07588	0.0089364	0.0400542	22.5656	4.49605	up
Lmmp003817	UPLC-MS/MS	C24H22O14	Kaempferol-3-O-(6''-malonyl)glucoside	山奈酚-3-O-(6''-丙二酰)葡萄糖苷	Flavonoids	黄酮	Flavonols	黄酮醇	-	208020	324970	43470	4140900	3305800	4300400	1.08559	0.00442695	0.0326642	20.378	4.34894	up
Lmhp010908	UPLC-MS/MS	C27H54NO7P	LysoPC 19:1	溶血磷脂酰胆碱 19:1	Lipids	脂质	LPC	溶血磷脂酰胆碱	-	130320	82597	95528	28414	43133	24568	1.08595	0.0256775	0.0596764	0.311611	-1.68218	down
Lmdn001925	UPLC-MS/MS	C26H34O12	Olivil-4'-O-glucoside	橄榄树脂素-4'-O-葡萄糖苷	Lignans and Coumarins	木脂素和香豆素	Lignans	木脂素	76880-93-8	3144.5	3572.2	4990.2	102000	67738	120290	1.14528	0.0263421	0.060186	24.7741	4.63076	up
pmc0960	UPLC-MS/MS	C28H50NO7P	LysoPC 20:4	溶血磷脂酰胆碱 20:4	Lipids	脂质	LPC	溶血磷脂酰胆碱	-	101310	19426	41891	9	9	9	1.14799	0.156721	0.205185	0.000166024	-12.5563	down
pmd0147	UPLC-MS/MS	C28H54NO7P	LysoPC 20:2	溶血磷脂酰胆碱 20:2	Lipids	脂质	LPC	溶血磷脂酰胆碱	-	705180	435090	373300	1453100	1696600	884640	1.01074	0.0565701	0.093591	2.66545	1.41438	up
pmb0608	UPLC-MS/MS	C25H24O14	Chrysoeriol-7-O-(6''-malonyl)glucoside	金圣草黄素-7-O-(6''-丙二酰)葡萄糖苷	Flavonoids	黄酮	Flavones	黄酮	-	3640	4569.2	3328.8	521250	403520	359080	1.15399	0.0127617	0.0433699	111.271	6.79794	up
pmp000588	UPLC-MS/MS	C25H24O14	Diosmetin-7-O-(6''-malonyl)glucoside	香叶木素-7-O-(6''-O-丙二酰)葡萄糖苷	Flavonoids	黄酮	Flavones	黄酮	-	9	9	9	61007	55248	71872	1.1558	0.00598807	0.036405	6967.67	12.7665	up
pmp000980	UPLC-MS/MS	C27H32O12	Maohuoside A	茂藿苷 A	Flavonoids	黄酮	Flavonols	黄酮醇	128988-55-6	11186	13692	11905	194140	85365	358670	1.10544	0.127644	0.175623	17.3497	4.11684	up
Lmhp011549	UPLC-MS/MS	C28H56NO7P	LysoPC 20:1	溶血磷脂酰胆碱 20:1	Lipids	脂质	LPC	溶血磷脂酰胆碱	-	21759	19332	15228	62552	58050	58181	1.13847	0.000107976	0.005423	3.17447	1.66652	up
pmp000589	UPLC-MS/MS	C24H22O15	Quercetin-7-O-(6''-malonyl)glucoside	槲皮素-7-O-(6''-丙二酰)葡萄糖苷	Flavonoids	黄酮	Flavonols	黄酮醇	-	36837	146500	28270	35422000	26957000	22993000	1.14018	0.01626	0.0483519	403.446	8.65623	up
mws1138	UPLC-MS/MS	C24H26N2O13	Betanin (Betanidin-5-O-glucoside)	甜菜红苷 (甜菜苷-5-O-葡萄糖苷)	Alkaloids	生物碱	Plumerane	吲哚类生物碱	7659-95-2	41038	119250	30872	29403000	22380000	29623000	1.1458	0.00762466	0.0388329	425.853	8.73421	up
Hmln002355	UPLC-MS/MS	C27H34O12	5'-Methoxymatairesinoside	5'-甲氧基罗汉松脂苷	Lignans and Coumarins	木脂素和香豆素	Lignans	木脂素	1691201-82-7	62718	42251	177680	2443.9	4290.8	11129	1.05815	0.170795	0.220497	0.063201	-3.98391	down
pmn001365	UPLC-MS/MS	C27H24O13	Salvianolic acid K	丹酚酸 K	Phenolic acids	酚酸类	Phenolic acids	酚酸类	203733-40-8	250140	198490	152570	9	9	9	1.15515	0.0192104	0.0516097	4.49102e-05	-14.4426	down
Hmyn007087	UPLC-MS/MS	C25H49O11P	LysoPI 16:0	溶血磷脂酰肌醇 16:0	Lipids	脂质	Glycerol ester	甘油酯	-	385.76	279.4	433.61	30615	4857.6	18330	1.10723	0.142036	0.189922	48.9662	5.61371	up
Rfmb25702	UPLC-MS/MS	C28H34O12	Pinoresinol-4-O-(6''-acetyl)glucoside	松脂醇-4-O-(6''-乙酰)葡萄糖苷	Lignans and Coumarins	木脂素和香豆素	Lignans	木脂素	-	21096	6940.2	3625.5	1230900	473340	406170	1.11439	0.119919	0.166823	66.655	6.05864	up
Lmqp007331	UPLC-MS/MS	C30H26O12	Kaempferol-3-O-(3''-O-p-Coumaroyl)rhamnoside	山奈酚-3-O-(3''-O-对香豆酰)鼠李糖苷	Flavonoids	黄酮	Flavonols	黄酮醇	-	35158	134900	150510	59617000	69033000	64423000	1.14294	0.00178237	0.0217474	602.284	9.2343	up
Lmqp007185	UPLC-MS/MS	C30H26O12	Kaempferol-3-O-(4''-O-p-Coumaroyl)rhamnoside	山奈酚-3-O-(4''-O-对香豆酰)鼠李糖苷	Flavonoids	黄酮	Flavonols	黄酮醇	-	22628	100120	113100	62076000	60973000	61422000	1.14173	2.37526e-05	0.00379395	782.161	9.61132	up
Lmmp006709	UPLC-MS/MS	C30H26O12	Kaempferol-3-O-(4''-p-coumaroyl)rhamnoside	山奈酚-3-O-(4''-对香豆酰基)鼠李糖苷	Flavonoids	黄酮	Flavonols	黄酮醇	-	6229.1	12256	10744	5519300	10294000	6647000	1.15086	0.0351873	0.0705831	768.423	9.58576	up
MWSHY0201	UPLC-MS/MS	C27H30O14	Kaempferol-3,7-O-dirhamnoside (Kaempferitrin)	山奈酚-3,7-O-二鼠李糖苷 (山奈苷)	Flavonoids	黄酮	Flavonols	黄酮醇	482-38-2	1793	896.25	894.25	9	9	9	1.1498	0.0582106	0.0958281	0.00753453	-7.05227	down
mws0046	UPLC-MS/MS	C27H32O14	Naringenin-7-O-Neohesperidoside(Naringin)	柚皮素-7-O-新橙皮糖苷(柚皮苷)	Flavonoids	黄酮	Flavanones	二氢黄酮	10236-47-2	9	9	9	13938	8142.2	8151.8	1.15474	0.0348478	0.0702958	1119.7	10.1289	up
Rfmb056	UPLC-MS/MS	C29H36O13	medioresinol-4'-O-(6'''-acetyl)glucoside	杜仲树脂酚-4'-O-(6'''-乙酰)葡萄糖苷	Lignans and Coumarins	木脂素和香豆素	Lignans	木脂素	-	17343	49935	29851	281260	278280	232110	1.10997	0.000722934	0.0150215	8.1505	3.02689	up
Zmcp003989	UPLC-MS/MS	C27H30O15	Kaempferol-3-O-rhamnosyl(1→2)glucoside	山奈酚-3-O-鼠李糖基(1→2)葡萄糖苷	Flavonoids	黄酮	Flavonols	黄酮醇	-	17917	15079	9472.5	113340	34628	151450	1.02255	0.129722	0.177095	7.05035	2.8177	up
pmp000593	UPLC-MS/MS	C27H30O15	Luteolin-7-O-rutinoside	木犀草素-7-O-芸香糖苷	Flavonoids	黄酮	Flavones	黄酮	3563-98-2	55263	216910	49733	2232900	2570800	2510300	1.11183	0.000262826	0.00807531	22.7209	4.50595	up
Lmsn002815	UPLC-MS/MS	C27H30O15	Kaempferol-3-O-rutinoside(Nicotiflorin)	山奈酚-3-O-芸香糖苷(烟花苷)	Flavonoids	黄酮	Flavonols	黄酮醇	17650-84-9	28580	82156	8120	325160	573380	447100	1.03753	0.0216195	0.0543157	11.3216	3.50101	up
pmp001106	UPLC-MS/MS	C27H30O15	Vitexin-2''-O-glucoside	牡荆素-2''-O-葡萄糖苷	Flavonoids	黄酮	Flavonoid carbonoside	黄酮碳糖苷	61360-94-9	365020	190360	184440	5422900	6105700	6367200	1.14563	0.00167481	0.0213235	24.1894	4.5963	up
Lmsp004247	UPLC-MS/MS	C27H30O15	Isorhamnetin-3-O-arabinoside-7-O-rhamnoside	异鼠李素-3-O-阿拉伯糖苷-7-O-鼠李糖苷	Flavonoids	黄酮	Flavonols	黄酮醇	-	12279	10926	6381.2	839460	1436300	2108500	1.14578	0.0582495	0.0958281	148.186	7.21127	up
MWSHY0061	UPLC-MS/MS	C27H30O15	Kaempferol-3-O-neohesperidoside	山奈酚-3-O-新橙皮糖苷	Flavonoids	黄酮	Flavonols	黄酮醇	32602-81-6	250110	700300	126190	9430000	10544000	9449000	1.11328	0.000243776	0.00764846	27.3296	4.77239	up
mws1073	UPLC-MS/MS	C27H30O15	Apigenin-6,8-di-C-glucoside (Vicenin-2)	芹菜素-6,8-二-C-葡萄糖苷 (新西兰牡荆苷 II)	Flavonoids	黄酮	Flavonoid carbonoside	黄酮碳糖苷	23666-13-9	2181400	1387400	1193900	34432000	33164000	34817000	1.14916	5.17246e-06	0.00100978	21.5031	4.42648	up
MWSHY0080	UPLC-MS/MS	C27H30O15	Luteolin-7-O-neohesperidoside (Lonicerin)	木犀草素-7-O-新橘皮糖苷 (忍冬苷)	Flavonoids	黄酮	Flavones	黄酮	25694-72-8	337990	790910	136330	8695900	11441000	9268500	1.10645	0.00572521	0.0363289	23.2411	4.53861	up
Lmsp004670	UPLC-MS/MS	C27H30O15	Kaempferol-3-O-glucoside-7-O-rhamnoside	山奈酚-3-O-葡萄糖苷-7-O-鼠李糖苷	Flavonoids	黄酮	Flavonols	黄酮醇	-	301630	811740	163890	9105300	11762000	8576500	1.11194	0.00876202	0.0399155	23.0523	4.52684	up
Hmmp003156	UPLC-MS/MS	C27H30O15	Saponarin(Isovitexin-7-O-glucoside)	皂草苷(异牡荆素-7-O-葡萄糖苷)	Flavonoids	黄酮	Flavones	黄酮	20310-89-8	20204	42951	7670.5	238910	232000	261610	1.07847	9.8727e-05	0.00525647	10.3426	3.37053	up
Lmjp002596	UPLC-MS/MS	C26H28O16	Quercetin-3-O-sambubioside	槲皮素-3-O-桑布双糖苷	Flavonoids	黄酮	Flavonols	黄酮醇	83048-35-5	3314.2	3454	4675.7	78830	106780	48399	1.13795	0.0478672	0.0833526	20.4484	4.35391	up
Lmmp000897	UPLC-MS/MS	C30H26O14	Gallocatechin-(4α→8)-gallocatechin	没食子儿茶素-(4α→8)-没食子儿茶素	Flavonoids	黄酮	Flavanols	黄烷醇类	-	19768	6529	3927	431320	268190	537620	1.12001	0.0354534	0.0705831	40.932	5.35516	up
Lmsp004166	UPLC-MS/MS	C27H30O16	Quercetin-3-O-glucoside-7-O-rhamnoside	槲皮素-3-O-葡萄糖苷-7-O-鼠李糖苷	Flavonoids	黄酮	Flavonols	黄酮醇	-	900.1	19210	9	4571800	5685300	2945700	1.03645	0.031235	0.0659948	656.232	9.35806	up
Zmjp003031	UPLC-MS/MS	C27H30O16	Orientin-2''-O-galactoside	荭草素-2''-O-半乳糖苷	Flavonoids	黄酮	Flavonoid carbonoside	黄酮碳糖苷	-	12485	9934.4	15986	7633100	8141800	9584800	1.15442	0.00476152	0.0338227	660.316	9.36701	up
Lmjp002461	UPLC-MS/MS	C27H30O16	Quercetin-3-O-neohesperidoside	槲皮素 3-O-新橘皮糖苷	Flavonoids	黄酮	Flavonols	黄酮醇	117611-67-3	9	9	9	249070	260950	260200	1.15586	0.000223774	0.00741231	28526.7	14.8	up
Zmhp003716	UPLC-MS/MS	C27H30O16	Rhodionidin	Rhodionidin	Flavonoids	黄酮	Flavonols	黄酮醇	-	188840	13167	20461	21930000	33910000	34076000	1.12273	0.0175976	0.0494017	404.175	8.65884	up
Zmhn002032	UPLC-MS/MS	C28H34O15	4-O-(6'-O-Glucosylcaffeoylglucosyl)-4-hydroxybenzyl alcohol	4-O-(6'-O-葡萄糖基咖啡酰葡萄糖基)-4-羟基苄醇	Phenolic acids	酚酸类	Phenolic acids	酚酸类	-	9	7941.8	9	785060	1100100	1046600	1.03924	0.00978544	0.0409664	368.321	8.52482	up
pmp000686	UPLC-MS/MS	C28H34O15	Forsythiaside J	连翘酯苷 J	Phenolic acids	酚酸类	Phenolic acids	酚酸类	-	9037.7	4413.2	621.04	152310	197970	109960	1.07003	0.0270577	0.0606383	32.7062	5.03149	up
Cmdn003997	UPLC-MS/MS	C25H38O17	6'-O-α-D-galactopyranosylbarlerin	6'-O-α-D-半乳糖基(8-O-乙酰山栀苷甲酯)	Terpenoids	萜类	Monoterpenoids	倍萜	927691-89-2	9	9	9	879410	1226800	1194900	1.15555	0.00999889	0.0409664	122263	16.8996	up
mws4134	UPLC-MS/MS	C20H32N6O12S2	Oxiglutatione	氧化谷胱甘肽	Amino acids and derivatives	氨基酸及其衍生物	Amino acids and derivatives	氨基酸及其衍生物	27025-41-8	441380	449490	488370	130570	85168	108580	1.13741	6.03987e-05	0.00466038	0.235143	-2.08839	down
pmp000241	UPLC-MS/MS	C27H28O17	Luteolin-6-C-(2''-glucuronyl)glucoside	木犀草素-6-C-(2''-葡萄糖醛酸基)葡萄糖苷	Flavonoids	黄酮	Flavones	黄酮	-	9	9	9	10756	41393	20276	1.14913	0.116615	0.163131	2682.41	11.3893	up
Lmzn001664	UPLC-MS/MS	C27H28O17	Kaempferol-3-O-glucuronide-7-O-glucoside	山奈酚-3-O-葡萄糖醛酸苷-7-O-葡萄糖苷	Flavonoids	黄酮	Flavonols	黄酮醇	-	9	9	9	3218200	1410400	5194500	1.15424	0.0956595	0.141238	363819	18.4729	up
HJN051	UPLC-MS/MS	C28H32O16	Tamarixetin-3-O-rutinoside	柽柳黄素-3-O-芸香糖苷	Flavonoids	黄酮	Flavonols	黄酮醇	-	3029300	2643200	1380900	10701000	10813000	14296000	1.10594	0.00712232	0.0379579	5.07698	2.34397	up
Hmlp004943	UPLC-MS/MS	C28H32O16	Nitensoside B	Nitensoside B	Lignans and Coumarins	木脂素和香豆素	Coumarins	香豆素	-	482240	415860	297330	5413000	4985700	5086900	1.14976	0.000129054	0.00559682	12.954	3.69533	up
Lmsp003939	UPLC-MS/MS	C28H32O16	Isorhamnetin-3-O-galactoide-7-O-rhamnoside	异鼠李素-3-O-半乳糖苷-7-O-鼠李糖苷	Flavonoids	黄酮	Flavonols	黄酮醇	-	1351000	782680	685270	84506000	89673000	95200000	1.15184	0.00115308	0.0177717	95.56	6.57834	up
Lmnp002584	UPLC-MS/MS	C28H32O16	Hispidulin-8-C-(2''-O-glucosyl)glucoside	高车前素-8-C-(2''-O-葡萄糖基)葡萄糖苷	Flavonoids	黄酮	Flavonoid carbonoside	黄酮碳糖苷	-	352680	133310	139660	35851000	39588000	43888000	1.14852	0.00340068	0.0287256	190.725	7.57535	up
Lmsp004045	UPLC-MS/MS	C28H32O16	Isorhamnetin-3-O-glucoside-7-O-rhamnoside	异鼠李素-3-O-葡萄糖苷-7-O-鼠李糖苷	Flavonoids	黄酮	Flavonols	黄酮醇	-	1161500	579650	900890	85988000	90469000	99070000	1.15173	0.00174527	0.0217474	104.286	6.7044	up
pmb0603	UPLC-MS/MS	C28H32O16	Chrysoeriol-7,4'-di-O-glucoside	金圣草黄素-7,4'-二-O-葡萄糖苷	Flavonoids	黄酮	Flavones	黄酮	-	49168	41936	42730	470790	447680	471610	1.15518	0.000127426	0.00559682	10.3866	3.37665	up
Lmmp002963	UPLC-MS/MS	C28H32O16	6-C-Methylquercetin-3-O-rutinoside	6-C-甲基槲皮素-3-O-芸香糖苷	Flavonoids	黄酮	Flavonols	黄酮醇	-	7570.5	1010.1	6359.7	749880	969450	1105300	1.12513	0.0119796	0.0420122	189.061	7.56271	up
Lmmp002463	UPLC-MS/MS	C28H32O16	Sexangularetin-3-O-glucoside-7-O-rhamnoside	3,5,7,4'-四羟基-8-甲氧基黄酮-3-O-葡萄糖苷-7-O-鼠李糖苷	Flavonoids	黄酮	Flavonols	黄酮醇	-	470280	453500	288910	5189500	4598200	4216100	1.14649	0.00325825	0.0281719	11.5477	3.52954	up
Lmsp004721	UPLC-MS/MS	C28H32O16	Tamarixetin-3-O-glucoside-7-O-rhamnoside	柽柳黄素-3-O-葡萄糖苷-7-O-鼠李糖苷	Flavonoids	黄酮	Flavonols	黄酮醇	-	452460	498770	285420	5615800	4616200	5020200	1.14554	0.00266703	0.0257471	12.3335	3.62451	up
pme1540	UPLC-MS/MS	C28H32O16	Isorhamnetin-3-O-neohesperidoside	异鼠李素-3-O-新橙皮糖苷	Flavonoids	黄酮	Flavonols	黄酮醇	55033-90-4	277070	163070	180920	28323000	29896000	38831000	1.15318	0.0101982	0.0410063	156.265	7.28785	up
MWSHY0135	UPLC-MS/MS	C28H32O16	Isorhamnetin-3-O-rutinoside (Narcissin)	异鼠李素-3-O-芸香糖苷 (水仙苷)	Flavonoids	黄酮	Flavones	黄酮	604-80-8	436010	595290	301730	5534100	4764900	4416900	1.1404	0.00352001	0.0290359	11.0394	3.46459	up
Lmhp003217	UPLC-MS/MS	C28H32O16	2'-Hydoxy,5-methoxyGenistein-O-rhamnosyl-glucoside	2'-羟基-5-甲氧基染料木素-O-鼠李糖-葡萄糖	Flavonoids	黄酮	Isoflavones	异黄酮	-	436240	485990	322430	4940500	4898200	5229400	1.15084	5.52683e-05	0.00466038	12.1062	3.59767	up
pmp000127	UPLC-MS/MS	C28H32O16	Chrysoeriol-6,8-di-C-glucoside	金圣草黄素-6,8-二-C-葡萄糖苷	Flavonoids	黄酮	Flavonoid carbonoside	黄酮碳糖苷	-	9	9	9	64489	134520	113890	1.15416	0.0374731	0.0728322	11588.9	13.5005	up
HJAP026	UPLC-MS/MS	C28H32O16	Chrysoeriol-6-C-glucoside-4'-O-glucoside	金圣草黄素-6-C-葡萄糖苷-4'-O-葡萄糖苷	Flavonoids	黄酮	Flavonoid carbonoside	黄酮碳糖苷	-	380830	201990	270190	34654000	45328000	47960000	1.1521	0.009088	0.0401646	149.989	7.22871	up
pmp001311	UPLC-MS/MS	C27H30O17	6-Hydroxykaempferol-7,6'-O-Diglucoside	6-羟基山奈酚-7,6'-O-二葡萄糖苷	Flavonoids	黄酮	Flavonols	黄酮醇	-	3691.9	14284	12114	19170000	16357000	13402000	1.1473	0.0102768	0.0410063	1626.09	10.6672	up
Zmcp002666	UPLC-MS/MS	C27H30O17	Quercetin-3,7-Di-O-glucoside	槲皮素-3,7-二-O-葡萄糖苷	Flavonoids	黄酮	Flavonols	黄酮醇	-	7158.3	8960	15048	12764000	11052000	10943000	1.15309	0.00258443	0.0257471	1115.28	10.1232	up
Zmhp003784	UPLC-MS/MS	C27H30O17	Rhodioflavonoside	Rhodioflavonoside	Flavonoids	黄酮	Flavonols	黄酮醇	-	9	9	9	862890	1050700	734690	1.15557	0.0106339	0.0411538	98084.4	16.5817	up
pmp001310	UPLC-MS/MS	C27H30O17	6-Hydroxykaempferol-3,6-O-Diglucoside	6-羟基山奈酚-3,6-O-二葡萄糖苷	Flavonoids	黄酮	Flavonols	黄酮醇	-	16119	47581	44601	15199000	29319000	17556000	1.14537	0.0419121	0.0779255	573.162	9.1628	up
pmb0645	UPLC-MS/MS	C28H34O16	Hesperetin-6-C-glucoside-7-O-glucoside	橙皮素-6-C-葡萄糖苷-7-O-葡萄糖苷	Flavonoids	黄酮	Flavonoid carbonoside	黄酮碳糖苷	-	7797.4	9	2097.1	738360	1087800	751810	1.0086	0.0173341	0.0494017	260.309	8.02408	up
pmb0618	UPLC-MS/MS	C28H34O16	Hesperetin-8-C-glucoside-3'-O-glucoside	橙皮素-8-C-葡萄糖苷-3'-O-葡萄糖苷	Flavonoids	黄酮	Flavonoid carbonoside	黄酮碳糖苷	-	9	8002.5	9	1515400	1119700	1627100	1.04685	0.0115605	0.0415108	531.413	9.05369	up
Hmlp002975	UPLC-MS/MS	C28H30O17	Isorhamnetin-3-O-glucuronide-7-O-rhamnoside	异鼠李素-3-O-葡萄糖醛酸苷-7-O-鼠李糖苷	Flavonoids	黄酮	Flavonols	黄酮醇	-	9	9	9	420510	227920	486100	1.15514	0.0395037	0.0752037	42019.6	15.3588	up
Lmmp002560	UPLC-MS/MS	C27H28O18	Quercetin-3-O-(2''-O-glucosyl)glucuronide	槲皮素-3-O-(2''-O-葡萄糖基)葡萄糖醛酸苷	Flavonoids	黄酮	Flavonols	黄酮醇	-	9	9	9	928350	181200	472650	1.15228	0.136096	0.184223	58600	15.8386	up
Hmcp001578	UPLC-MS/MS	C28H32O17	Isorhamnetin-3,7-O-diglucoside	异鼠李素-3,7-O-二葡萄糖苷	Flavonoids	黄酮	Flavonols	黄酮醇	6758-51-6	1160000	397710	72738	7015400	3704700	7906000	1.0063	0.0403663	0.0760167	11.4239	3.51399	up
Lmhp002800	UPLC-MS/MS	C28H32O17	2'-Hydoxy,5-methoxyGenistein-4',7-O-diglucoside	2'-羟基-5-甲氧基染料木素-4',7-O-二葡萄糖	Flavonoids	黄酮	Isoflavones	异黄酮	-	25028	19554	9104.5	537050	424210	233810	1.12292	0.0497022	0.085031	22.2602	4.47639	up
Lmsp003252	UPLC-MS/MS	C28H32O17	Isorhamnetin-3-O-sophoroside	异鼠李素-3-O-槐糖苷	Flavonoids	黄酮	Flavonols	黄酮醇	-	2552200	1089100	182450	30838000	20774000	26970000	1.0575	0.0103678	0.0410063	20.551	4.36114	up
pmb2653	UPLC-MS/MS	C24H42O20	D(+)-Melezitose O-rhamnoside	松三糖 O-鼠李糖苷	Others	其它类	Saccharides and Alcohols	糖及醇类	-	94728	41165	132380	10486	19363	26039	1.00441	0.112044	0.158429	0.208325	-2.26309	down
Lmhp008513	UPLC-MS/MS	C33H56O14	2-α-Linolenoyl-glycerol-1,3-di-O-glucoside	2-α-亚麻酸甘油酯-1,3-二-O-葡萄糖苷	Lipids	脂质	Glycerol ester	甘油酯	-	4396.2	346.04	880.29	69955	20159	67318	1.05625	0.0879016	0.131876	28.0002	4.80737	up
Lmyn005812	UPLC-MS/MS	C33H56O14	Gingerglycolipid A	姜糖脂 A	Lipids	脂质	Glycerol ester	甘油酯	145937-22-0	62185	31665	35899	1393200	985320	1298400	1.1466	0.0103428	0.0410063	28.3387	4.8247	up
Lmhp008744	UPLC-MS/MS	C33H56O14	1-α-Linolenoyl-glycerol-2,3-di-O-glucoside	1-α-亚麻酸甘油酯-2,3-二-O-葡萄糖苷	Lipids	脂质	Glycerol ester	甘油酯	-	6179	4578.3	2509	110350	141750	193750	1.13964	0.0270927	0.0606394	33.6077	5.07072	up
HJN102	UPLC-MS/MS	C34H30O15	3,4,5-Tricaffeoylquinic acid	3,4,5-三咖啡酰奎宁酸	Phenolic acids	酚酸类	Phenolic acids	酚酸类	86632-03-3	12996	10469	32224	3165500	4152000	2724200	1.14389	0.0156802	0.0479399	180.317	7.4944	up
Lmgn002250	UPLC-MS/MS	C31H34O17	Dicaffeoylquinic acid-O-glucoside	二咖啡酰基奎宁酸-O-葡萄糖苷	Phenolic acids	酚酸类	Phenolic acids	酚酸类	-	296170	88320	384720	1208200	1144100	1241800	1.02129	0.00479491	0.0338227	4.67246	2.22418	up
pmn001370	UPLC-MS/MS	C32H42O16	Pinoresinol-4,4'-O-di-O-glucoside	松脂醇-4,4'-O-二-O-葡萄糖苷	Lignans and Coumarins	木脂素和香豆素	Lignans	木脂素	63902-38-5	139680	111570	99618	4648600	4008000	3199300	1.1525	0.0116946	0.0415301	33.7902	5.07853	up
Lmgn002253	UPLC-MS/MS	C31H36O18	Syringoylcaffeoylquinic acid-D-glucose	丁香酰咖啡酰奎宁酸葡萄糖	Phenolic acids	酚酸类	Phenolic acids	酚酸类	-	80144	18799	79492	412200	550400	518570	1.06297	0.00298526	0.0276058	8.30089	3.05327	up
Hmzn004430	UPLC-MS/MS	C32H40O17	Sesamolinol 4'-O-B-D-Glucosyl (1->6)-O-B-D-Glucoside	芝麻林素酚 4'-O-β-D-葡萄糖基 (1->6)-O-β-D-葡萄糖苷	Lignans and Coumarins	木脂素和香豆素	Lignans	木脂素	-	1529200	1079400	7509100	317120	215570	180710	1.02021	0.269493	0.318847	0.0705101	-3.82603	down
Hmcp001947	UPLC-MS/MS	C31H34O19	Isorhamnetin-3-O-(6''-malonyl)glucoside-7-O-rhamnoside	异鼠李素-3-O-(6''-丙二酰)葡萄糖苷-7-O-鼠李糖苷	Flavonoids	黄酮	Flavonols	黄酮醇	-	1228000	661200	630460	3121700	3070000	5379200	1.08749	0.050586	0.0860348	4.59225	2.1992	up
pmb0706	UPLC-MS/MS	C30H32O20	Quercetin-3-O-(6''-O-malonyl)glucosyl-5-O-glucoside	槲皮素-3-O-(6''-O-丙二酰)葡萄糖苷-5-O-葡萄糖苷	Flavonoids	黄酮	Flavonols	黄酮醇	-	9	9	9	440900	175830	322760	1.15483	0.0550394	0.0917498	34795.9	15.0866	up
pmn001372	UPLC-MS/MS	C33H44O17	medioresinol-4,4'-di-O-glucoside	杜仲树脂酚-4,4'-二-O-葡萄糖苷	Lignans and Coumarins	木脂素和香豆素	Lignans	木脂素	88142-63-6	12954	11373	19249	112630	81564	132490	1.13117	0.0214714	0.0542809	7.49688	2.90629	up
Zmlp003063	UPLC-MS/MS	C33H40O19	Luteolin-7-O-(2''-O-rhamnosyl)rutinoside	木犀草素-7-O-(2''-O-鼠李糖基)芸香糖苷	Flavonoids	黄酮	Flavones	黄酮	-	21116	13855	9680	1694900	3627300	1653100	1.14521	0.0710856	0.112318	156.218	7.28742	up
Lmsp003881	UPLC-MS/MS	C33H40O19	Kaempferol-3-O-rutinoside-7-O-rhamnoside	山奈酚-3-O-芸香糖苷-7-O-鼠李糖苷	Flavonoids	黄酮	Flavonols	黄酮醇	-	14597	9004.2	5529	800370	1445500	593160	1.14031	0.0675459	0.108447	97.46	6.60674	up
Hmdp103165	UPLC-MS/MS	C33H40O19	Clitorin	蝶豆素	Flavonoids	黄酮	Flavones	黄酮	55804-74-5	3643	4541	5025.8	979590	1605400	820560	1.15126	0.0420659	0.0781287	257.805	8.01014	up
mws1035	UPLC-MS/MS	C33H40O19	Kaempferol-3-O-robinoside-7-O-rhamnoside (Robinin)	山奈酚-3-O-刺槐糖苷-7-O-鼠李糖苷 (刺槐苷)	Flavonoids	黄酮	Flavonols	黄酮醇	301-19-9	9018	9129.8	17656	1400600	2574900	1320500	1.1458	0.0495233	0.085031	147.917	7.20865	up
Hmgp003409	UPLC-MS/MS	C33H40O20	Quercetin-3-O-Soph-7-O-Rha b	Quercetin-3-O-Soph-7-O-Rha b	Flavonoids	黄酮	Flavones	黄酮	-	9	9	9	5531200	5683000	6017300	1.15587	0.000624311	0.014063	638204	19.2837	up
Zmgp002857	UPLC-MS/MS	C33H40O20	Quercetin-3-O-α-rhamnosyl (1→2)-[α-rhamnosyl (1→6)]-β-glucoside	槲皮素-3-O-α-鼠李糖基(1→2)-[α-鼠李糖基(1→6)]-β-葡萄糖苷	Flavonoids	黄酮	Flavonols	黄酮醇	-	1617.5	2426.2	7222.8	6531800	5915400	5106800	1.1467	0.00494127	0.0345889	1558.07	10.6055	up
HJAP119	UPLC-MS/MS	C34H42O20	Rhamnetin-3-O-Rutinoside-5-O-rhamnoside	鼠李素-3-O-芸香糖苷-5-O-鼠李糖苷	Flavonoids	黄酮	Flavonols	黄酮醇	-	457620	230270	326330	18842000	31885000	26683000	1.1481	0.0214223	0.0542347	76.3247	6.25408	up
pmb0592	UPLC-MS/MS	C34H42O20	Chrysoeriol-7-O-rutinoside-5-O-glucoside	金圣草黄素-7-O-芸香糖苷-5-O-葡萄糖苷	Flavonoids	黄酮	Flavones	黄酮	-	671090	362910	420180	24654000	27004000	27650000	1.15143	0.00110531	0.0172776	54.538	5.76919	up
MWSHY0122	UPLC-MS/MS	C34H42O20	Typhaneoside	香蒲新苷	Flavonoids	黄酮	Flavones	黄酮	104472-68-6	457470	321150	276690	21475000	33622000	25770000	1.15117	0.0173855	0.0494017	76.6287	6.25981	up
Lmsp002982	UPLC-MS/MS	C33H40O21	Quercetin-3-O-sophoroside-7-O-rhamnoside	槲皮素-3-O-槐糖苷-7-O-鼠李糖苷	Flavonoids	黄酮	Flavonols	黄酮醇	-	9	9	9	209780	222280	151280	1.15547	0.0124306	0.0426978	21605.2	14.3991	up
Lmmp002334	UPLC-MS/MS	C33H40O21	Quercetin-3-O-rutinoside-7-O-glucoside	槲皮素-3-O-芸香糖苷-7-O-葡萄糖苷	Flavonoids	黄酮	Flavonols	黄酮醇	-	1058.2	9	740.25	36038	69514	47713	1.0102	0.0356293	0.0707352	84.7963	6.40593	up
Zmqp002952	UPLC-MS/MS	C33H41O21+	Delphinidin-3-O-rutinoside-7-O-glucoside	飞燕草素-3-O-芸香糖苷-7-O-葡萄糖苷	Flavonoids	黄酮	Anthocyanidins	花青素	-	9	9	9	55239	35965	94277	1.15392	0.0691032	0.110369	6869.67	12.746	up
Hmmp006067	UPLC-MS/MS	C42H68O13	Oleanolic acid-3-O-glucosyl(1→2)glucoside	齐墩果酸-3-O-葡萄糖基(1→2)葡萄糖苷	Terpenoids	萜类	Triterpene Saponin	三萜皂苷	-	9	9	9	78389	49666	36193	1.15455	0.0479834	0.083472	6083.26	12.5706	up
Lmsp003790	UPLC-MS/MS	C34H42O21	Isorhamnetin-3-O-sophoroside-7-O-rhamnoside	异鼠李素-3-O-槐糖苷-7-O-鼠李糖苷	Flavonoids	黄酮	Flavonols	黄酮醇	41328-75-0	174050	130730	241070	2469900	2949900	1888200	1.13882	0.0171849	0.0494017	13.3883	3.7429	up
mws1150	UPLC-MS/MS	C35H46O20	Echinacoside	松果菊苷	Phenolic acids	酚酸类	Phenolic acids	酚酸类	82854-37-3	12283	17839	29398	129820	200990	78160	1.0739	0.0793066	0.12223	6.87114	2.78055	up
Cmdn004237	UPLC-MS/MS	C35H46O20	Betonyoside E	Betonyoside E	Phenolic acids	酚酸类	Phenolic acids	酚酸类	181301-30-4	42166	48200	72558	447120	464050	241910	1.11271	0.041715	0.0777236	7.07741	2.82322	up
Lmsp004090	UPLC-MS/MS	C43H48O23	Isorhamnetin-3-O-(6''-O-p-coumarol)sophoroside-7-O-rhamnoside	异鼠李素-3-O-(6''-O-对香豆酰)槐糖苷-7-O-鼠李糖苷	Flavonoids	黄酮	Flavonols	黄酮醇	-	28956	17116	47338	1165800	2150300	400040	1.09828	0.139916	0.187802	39.7831	5.31408	up
XMW0757	GC-MS	C18H36O2	Hexadecanoic acid, 15-methyl-, methyl ester	十六酸十五甲酯	Ester	酯	-	-	6929-04-0	12100.9	9032.9	14421.2	31086.8	50131.4	48630.7	1.09888	0.0294855	0.0634101	3.65206	1.86871	up
KMW0719	GC-MS	C20H42	Eicosane	二十烷	Hydrocarbons	烃类	-	-	112-95-8	9	9	9	31003.4	17611.4	22014.2	1.15525	0.026913	0.0604099	2615.89	11.3531	up
XMW0958	GC-MS	C11H23I	1-Iodoundecane	1-碘十一烷	Hydrocarbons	烃类	-	-	4282-44-4	42852.6	21623.4	69389.7	1.23355e+06	1.35646e+06	1.09206e+06	1.13239	0.00327095	0.0281719	27.5056	4.78165	up
XMW0017	GC-MS	C17H34O2	Hexadecanoic acid, methyl ester	十六酸甲酯	Ester	酯	-	-	112-39-0	12026.4	9001.11	14635	30115.4	50481.8	48329.6	1.09186	0.0340315	0.0692922	3.61519	1.85407	up
XMW0230	GC-MS	C19H40	Pentadecane, 2,6,10,14-tetramethyl-	2,6,10,14-四甲基-十五烷	Hydrocarbons	烃类	-	-	1921-70-6	9	9	9	71069.6	57086.1	69777.6	1.15589	0.00454267	0.0327109	7330.86	12.8398	up
XMW0636	GC-MS	C10H21I	1-iodo-Decane	1-碘-癸烷	Others	其它类	-	-	2050-77-3	958918	3.40802e+06	1.13867e+06	10539.9	20373.5	9585.06	1.13622	0.146988	0.194618	0.00735584	-7.08689	down
KMW0713	GC-MS	C17H28O2	2,6,10-Dodecatrien-1-ol, 3,7,11-trimethyl-, acetate, (E,E)-	（E，E）-醋酸法呢酯	Ester	酯	-	-	4128-17-0	311297	297445	342657	9	9	9	1.15589	0.00177378	0.0217474	2.83792e-05	-15.1048	down
XMW1486	GC-MS	C17H28O2	5-Azulenemethanol, 1,2,3,4,5,6,7,8-octahydro-.alpha.,.alpha.,3,8-tetramethyl-, acetate, [3S-(3.alpha.,5.alpha.,8.alpha.)]-	[3S-（3α，5α。，8α。）]-5-天青烯乙醇，1,2,3,4,5,6,7,8-八氢-α，α，3,8-四甲基-乙酸酯	Ester	酯	-	-	134-28-1	15139.1	8912.5	13955.4	969158	830682	1.09139e+06	1.15225	0.00618527	0.0367367	76.0709	6.24927	up
NMW0298	GC-MS	C14H26O4	Hexanedioic acid, bis(2-methylpropyl) ester	己二酸双（2-甲基丙基）酯	Ester	酯	-	-	141-04-8	5252.4	5312.34	12161.7	117957	120298	140451	1.13293	0.00171642	0.0216961	16.6637	4.05864	up
NMW0337	GC-MS	C14H26O4	Dibutyl adipate	己二酸二丁酯	Ester	酯	-	-	105-99-7	2251.37	1586.76	3410.44	8694.38	8049.17	8727.53	1.09293	0.00301528	0.0277327	3.51395	1.81309	up
D242	GC-MS	C16H30O2	9-Tetradecen-1-ol, acetate, (E)-	（E）-9-四氢萘-1-醇乙酸酯	Ester	酯	-	-	23192-82-7	232315	126873	221630	59125.6	51817.7	53137.9	1.09908	0.0529598	0.0889583	0.2825	-1.82368	down
D398	GC-MS	C16H30O2	5-Tetradecen-1-ol, acetate, (Z)-	Z-5-十四碳烯基乙酸酯	Ester	酯	-	-	35153-13-0	186873	99539.9	171486	77767.4	59522.5	65190.9	1.01451	0.0817569	0.125068	0.442195	-1.17724	down
XMW1491	GC-MS	C16H28O2	Lavandulyl caproate	辛酸癸酸	Acid	酸	-	-	59550-36-6	61364.7	22102.4	72042.3	1.82844e+06	3.48163e+06	1.85045e+06	1.12815	0.0507108	0.0860859	46.0455	5.52499	up
XMW1258	GC-MS	C15H24O3	Acetic acid, (4,6,8,9-tetramethyl-3-oxabicyclo[3.3.1]non-6-en-1-yl)methyl ester	（4,6,8,9-四甲基-3-氧杂双环[3.3.1]非6-烯-1-基）乙酸甲酯	Terpenoids	萜类	-	-	309722-81-4	32481.9	22763.4	25472.5	3.34629e+06	3.06507e+06	4.28714e+06	1.15432	0.0107216	0.0411633	132.542	7.0503	up
w14	GC-MS	C16H34O	Octane, 1,1'-oxybis-	1,1'-氧双-辛烷	Hydrocarbons	烃类	-	-	629-82-3	9	9	9	41679.2	31956.7	40694.4	1.15583	0.00651228	0.0374105	4234.45	12.048	up
XMW1046	GC-MS	C14H26O3	Heptanoic acid, anhydride	庚酰基庚酸酯	Ester	酯	-	-	626-27-7	9657.5	9006.39	9104.06	33308.6	37864.5	34925.5	1.15319	0.00214923	0.0233844	3.8209	1.93391	up
XMW0265	GC-MS	C17H36	Tetradecane, 2,6,10-trimethyl-	2,6,10-三甲基十四烷	Hydrocarbons	烃类	-	-	14905-56-7	1760.84	9	9	38046.5	28802.8	27478.4	1.01649	0.00970009	0.0409664	53.0276	5.72867	up
NMW0297	GC-MS	C16H32O	Oxirane, tetradecyl-	十四烷基-环氧乙烷	Hydrocarbons	烃类	-	-	7320-37-8	20327	14989.7	18179.1	711882	841900	1.18403e+06	1.15144	0.0238692	0.0569812	51.178	5.67745	up
NMW0362	GC-MS	C17H21N	BenzphetAmine	苯丙胺	Amine	胺	-	-	156-08-1	6660938	6489089	7260410	391840	267951	306304	1.15204	0.00102654	0.0167095	0.0473334	-4.401	down
D441	GC-MS	C15H26O2	Butanoic acid, 3-methyl-, 3,7-dimethyl-2,6-octadienyl ester, (Z)-	异戊酸内酯	Ester	酯	-	-	3915-83-1	57557.2	34758.3	35784.8	608188	1.08712e+06	862786	1.14177	0.0276602	0.0613624	19.9694	4.31972	up
XMW1264	GC-MS	C15H26O2	Acetic acid, 1-methyl-3-(2,6,6-trimethylcyclohex-1-enyl)propyl ester	4-（2,6,6-三甲基环己烯-1-基）丁烷-2-基乙酸酯	Ester	酯	-	-	86756-12-9	10905.7	7716.29	18504.3	1.41076e+06	3.056e+06	3.93437e+06	1.14235	0.0637229	0.103095	226.285	7.82199	up
KMW0638	GC-MS	C15H26O2	Geranyl isovalerate	异戊酸香叶基酯	Ester	酯	-	-	109-20-6	13146.5	12691	44070.2	1.63255e+06	2.24529e+06	2.42736e+06	1.13547	0.012992	0.0436262	90.1934	6.49495	up
NMW0280	GC-MS	C15H26O2	2-Furanmethanol, tetrahydro-.alpha.,.alpha.,5-trimethyl-5-(4-methyl-3-cyclohexen-1-yl)-, [2S-[2.alpha.,5.beta.(R*)]]-	[2S-[2α，5bR*）]]-四氢-α，α，5-三甲基-5-（4-甲基-3-环己烯-1-基）-2-呋喃甲醇	Terpenoids	萜类	-	-	26184-88-3	11072	6997.5	3846.21	38673.7	31739.6	33435.5	1.08432	0.000761534	0.0152047	4.73855	2.24445	up
XMW0111	GC-MS	C15H24O2	Spiro[4.5]decan-7-one, 1,8-dimethyl-8,9-epoxy-4-isopropyl-	1,8-二甲基-8,9-环氧-4-异丙基-螺癸烷	Terpenoids	萜类	-	-	61050-91-7	41314.7	33192.5	19563.9	2.82986e+06	2.19907e+06	2.5813e+06	1.15069	0.00527522	0.0355466	80.8988	6.33805	up
XMW0972	GC-MS	C16H26O	Khusimyl methyl ether	苦参基甲基醚	Ether	醚	-	-	300349-20-6	33034.5	22530	25313.6	3.40787e+06	3.10807e+06	4.34011e+06	1.1542	0.0104946	0.0410063	134.227	7.06853	up
NMW0318	GC-MS	C15H22O2	Curcumenol	姜黄烯醇	Terpenoids	萜类	-	-	19431-84-6	149094	32506.8	218138	4.05008e+06	3.93785e+06	6.23171e+06	1.1026	0.0247697	0.0583384	35.5724	5.15268	up
NMW0277	GC-MS	C13H14O4	(S)-4-(1-Acetoxyallyl)phenyl acetate	（S）-4-（1-乙酰氧基烯丙基）苯乙酸酯	Ester	酯	-	-	52946-22-2	6675.98	2743.62	6157.34	276666	482160	253362	1.13976	0.0446615	0.0805386	64.9799	6.02192	up
XMW1441	GC-MS	C12H15N3S	Thiazol-2-Amine, N-(4-dimethylaminobenzyl)-	N-（4-二甲基氨基苄基）-噻唑-2-胺	Amine	胺	-	-	13159-95-0	9	9	9	40394.4	23922.3	33019.8	1.15544	0.0208953	0.0534397	3605.05	11.8158	up
NMW0287	GC-MS	C17H28	1,8,11,14-Heptadecatetraene, (Z,Z,Z)-	（Z，Z，Z）-1,8,11,14-庚二烯	Hydrocarbons	烃类	-	-	10482-53-8	38585	29358.3	34580	2.84866e+06	2.85789e+06	4.29211e+06	1.15341	0.0204897	0.0532585	97.5258	6.60771	up
XMW1184	GC-MS	C15H20O2	Butanoic acid, 3-methyl-, 8-decene-4,6-diynyl ester, (Z)-	（Z）-8-癸烯-4,6-二炔-1-基3-甲基丁酸酯	Ester	酯	-	-	126693-81-0	9	9	9	14316	9875	15361	1.15539	0.0159065	0.0481847	1464.89	10.5166	up
XMW0622	GC-MS	C12H22O4	Butanedioic acid, bis(2-methylpropyl) ester	丁二酸双（2-甲基丙基）酯	Ester	酯	-	-	925-06-4	2234.88	1236.22	3053.04	45584.3	28746.1	39963.6	1.13283	0.0175626	0.0494017	17.5186	4.13082	up
KMW0642	GC-MS	C16H34	Hexadecane	十六烷	Hydrocarbons	烃类	-	-	544-76-3	9	9	1062.04	54865.5	37538.5	40606.8	1.0464	0.0141137	0.0454172	123.154	6.94431	up
XMW0259	GC-MS	C16H34	Pentadecane, 2-methyl-	2-甲基-十五烷	Hydrocarbons	烃类	-	-	1560-93-6	4162.31	3445.35	3947.12	28438.3	29249	30041.4	1.15411	3.18487e-05	0.00464542	7.59242	2.92456	up
XMW0159	GC-MS	C16H34	2,6,10-Trimethyltridecane	2,6,10-三甲基十三烷	Hydrocarbons	烃类	-	-	3891-99-4	38109.8	36937.7	57431.9	2.62579e+06	4.03987e+06	5.54345e+06	1.14747	0.0411009	0.077152	92.1586	6.52605	up
D397	GC-MS	C14H26O2	11-Dodecen-1-yl acetate	11-十二烷基-1-基乙酸酯	Ester	酯	-	-	35153-10-7	3430.34	1581.45	3801.82	653750	436022	528410	1.14885	0.0135434	0.0444708	183.601	7.52043	up
KMW0585	GC-MS	C14H26O2	Citronellyl isobutyrate	异丁酸香茅酯	Ester	酯	-	-	97-89-2	36741.6	29813.5	25391.9	8.65574e+07	1.04753e+08	5.46931e+06	1.11546	0.164728	0.213916	2140.15	11.0635	up
D314	GC-MS	C14H26O2	8-Dodecen-1-ol, acetate, (Z)-	（Z）-8-十二烯-1-醇乙酸酯	Ester	酯	-	-	28079-04-1	13368.2	9935.29	50701.6	1.14832e+06	1.22535e+06	1.57569e+06	1.12223	0.00966154	0.0409664	53.3661	5.73785	up
XMW1308	GC-MS	C10H17F3O2	1-Octyl trifluoroacetate	1-辛基三氟乙酸酯	Ester	酯	-	-	2561-21-9	13152.5	28187.2	32869.7	5.78809e+06	4.58846e+06	6.12953e+06	1.14849	0.00719283	0.0379579	222.426	7.79718	up
XMW0916	GC-MS	C11H15Br	(5-bromopentyl)-Benzene,	（5-溴戊基）-苯	Halogenated hydrocarbons	卤代烃	-	-	14469-83-1	89936.8	69313.9	57116.6	1.08965e+08	1.39604e+08	1.54963e+07	1.13122	0.14258	0.190199	1220.45	10.2532	up
KMW0619	GC-MS	C14H24O2	Butanoic acid, 3,7-dimethyl-2,6-octadienyl ester, (E)-	丁酸香叶酯	Ester	酯	-	-	106-29-6	19360	13541.5	16112.9	150272	139898	140136	1.15117	7.38124e-05	0.00466038	8.77915	3.13408	up
KMW0558	GC-MS	C14H24O2	1,5-Dimethyl-1-vinyl-4-hexenyl butyrate	丁酸芳基酯	Ester	酯	-	-	78-36-4	2.79137e+06	1.23625e+06	4.07304e+06	1.36736e+07	1.03864e+07	1.04261e+07	1.04686	0.00381527	0.0303323	4.2572	2.0899	up
KMW0591	GC-MS	C14H24O2	Butanoic acid, 1,7,7-trimethylbicyclo[2.2.1]hept-2-yl ester, endo-	丁酸冰片酯	Ester	酯	-	-	13109-70-1	22894.7	16661.9	14638.3	9.45491e+06	1.07419e+07	7.47062e+06	1.15439	0.0105169	0.0410063	510.518	8.99582	up
D246	GC-MS	C14H24O2	Propanoic acid, 2-methyl-, 3,7-dimethyl-2,6-octadienyl ester, (Z)-	[（2Z）-3,7-二甲基辛基-2,6-二烯基] 2-甲基丙酸酯	Ester	酯	-	-	2345-24-6	610129	434325	444724	2.50845e+08	2.87883e+08	1.96543e+08	1.15452	0.0115559	0.0415108	493.743	8.94762	up
KMW0647	GC-MS	C13H20O3	Methyl jasmonate	茉莉酸甲酯	Ester	酯	-	-	1211-29-6	9	9	9	281838	568387	319910	1.15454	0.0491807	0.0849661	43338.3	15.4034	up
D241	GC-MS	C15H26O	3-Cyclohexene-1-methanol, .alpha.,4-dimethyl-.alpha.-(4-methyl-3-pentenyl)-, [R-(R*,R*)]-	[R-（R *，R *）]-α，4-二甲基-α-（4-甲基-3-戊烯基）-3-环己烯-1-甲醇	Terpenoids	萜类	-	-	23178-88-3	19522.8	17588.6	41883.9	2.03878e+06	5.30931e+06	7.10144e+06	1.136	0.0838586	0.127689	182.916	7.51504	up
KMW0687	GC-MS	C15H26O	1H-Cycloprop[e]azulen-4-ol, decahydro-1,1,4,7-tetramethyl-, [1aR-(1a.alpha.,4.beta.,4a.beta.,7.alpha.,7a.beta.,7b.alpha.)]-	（+）-香豆素醇	Terpenoids	萜类	-	-	552-02-3	2202.31	1204.77	1748.96	397279	276656	329627	1.15311	0.0108189	0.0411633	194.638	7.60465	up
KMW0652	GC-MS	C15H26O	Cubenol	（-）-小茴香酚	Phenol	酚	-	-	21284-22-0	25814.7	14066.6	37626.7	692926	1.10943e+06	754681	1.13627	0.0235191	0.0567624	32.9906	5.04398	up
D319	GC-MS	C15H26O	.beta.-Acorenol	β-阿可诺尔	Terpenoids	萜类	-	-	28400-11-5	34914.8	14017.8	49366.8	749750	1.13955e+06	881290	1.12576	0.0155256	0.0479399	28.1852	4.81687	up
KMW0671	GC-MS	C15H26O	(1R,4R)-1-methyl-4-(6-Methylhept-5-en-2-yl)cyclohex-2-enol	姜油烯醇	Alcohol	醇	-	-	58334-55-7	21341.6	17856.4	46815.4	2.26512e+06	5.61024e+06	7.72901e+06	1.13563	0.0829404	0.126499	181.418	7.50317	up
XMW0842	GC-MS	C15H26O	Palustrol (Ledum)	喇叭茶醇	Terpenoids	萜类	-	-	5986-49-2	9871.95	2838.79	1729.51	71615.6	49217.2	66387.7	1.08603	0.00718291	0.0379579	12.9652	3.69657	up
WMW0075	GC-MS	C15H26O	1,6,10-Dodecatrien-3-ol, 3,7,11-trimethyl-	3,7,11-三甲基-1,6,10-十二碳三烯-3-醇	Terpenoids	萜类	-	-	7212-44-4	10763.8	5780.56	8257.12	90267.3	86206.5	86079.3	1.1437	2.42663e-06	0.000771791	10.5862	3.40411	up
KMW0685	GC-MS	C15H26O	trans-Farnesol	（E）-法尼醇	Terpenoids	萜类	-	-	106-28-5	31417.1	16639.7	99924.4	1.16419e+06	1.17108e+06	1.66667e+06	1.10514	0.014663	0.0465247	27.0436	4.75721	up
XMW0027	GC-MS	C15H26O	Ledol	勒多尔	Terpenoids	萜类	-	-	577-27-5	162184	54077.5	25636.7	2.3693e+06	1.79988e+06	2.08929e+06	1.1081	0.00448041	0.0326642	25.8723	4.69334	up
XMW0843	GC-MS	C15H26O	(2E,4S,7E)-4-Isopropyl-1,7-dimethylcyclodeca-2,7-dienol	（2E，4S，7E）-4-异丙基-1,7-二甲基环癸-2,7-二烯醇	Alcohol	醇	-	-	198991-79-6	8997.52	8356.58	5859.1	142300	248580	141630	1.14319	0.0410497	0.0771384	22.94	4.51979	up
KMW0661	GC-MS	C15H26O	.alpha.-Bisabolol	Α-没药醇	Alcohol	醇	-	-	515-69-5	45429.3	34457.1	43873.7	1.45071e+06	1.63851e+06	2.29685e+06	1.15164	0.0207113	0.0532792	43.5202	5.44361	up
KMW0656	GC-MS	C15H26O	2-Naphthalenemethanol, decahydro-.alpha.,.alpha.,4a-trimethyl-8-methylene-, [2R-(2.alpha.,4a.alpha.,8a.beta.)]-	β-乙醛	Terpenoids	萜类	-	-	473-15-4	629.064	381.196	648.85	27017	64620.3	31638.5	1.142	0.0757258	0.118193	74.3024	6.21534	up
KMW0667	GC-MS	C15H26O	.tau.-Muurolol	丁三醇	Alcohol	醇	-	-	19912-62-0	44032.2	19315.9	63808.7	936632	1.79122e+06	1.14818e+06	1.12508	0.0394794	0.0752037	30.4823	4.9299	up
D244	GC-MS	C15H26O	(3S,3aR,3bR,4S,7R,7aR)-4-Isopropyl-3,7-dimethyloctahydro-1H-cyclopenta[1,3]cyclopropa[1,2]benzen-3-ol	（3S，3aR，3bR，4S，7R，7aR）-4-异丙基-3,7-二甲基八氢-1H-环戊[1,3]环丙烷[1,2]苯-3-3-醇	Terpenoids	萜类	-	-	23445-02-5	2.6449e+07	2.44999e+07	8.28767e+06	9.04858e+08	6.78936e+08	8.10019e+08	1.13504	0.00667595	0.0374105	40.411	5.33668	up
KMW0673	GC-MS	C15H26O	.alpha.-Cadinol	α-卡迪诺	Terpenoids	萜类	-	-	481-34-5	39139.5	19082.6	50845.9	953497	1.76034e+06	1.07273e+06	1.13354	0.0394295	0.0752037	34.7175	5.11759	up
NMW0310	GC-MS	C15H26O	2,6,10-Dodecatrien-1-ol, 3,7,11-trimethyl-	3,7,11-三甲基-2,6,10-十二碳三烯-1-醇	Terpenoids	萜类	-	-	4602-84-0	26573.4	12912.4	84310	1.38703e+06	1.41843e+06	1.81739e+06	1.11093	0.00727385	0.0380362	37.3425	5.22275	up
XMW0854	GC-MS	C15H26O	4a(2H)-Naphthalenol, 1,3,4,5,6,8a-hexahydro-4,7-dimethyl-1-(1-methylethyl)-, (1S,4S,4aS,8aR)-	（1S，4S，4aS，8aR）-1,3,4,5,6,8a-六氢-4,7-二甲基-1-（1-甲基乙基）-4a（2H）-萘	Terpenoids	萜类	-	-	73365-77-2	20802.2	16195.1	45056	1.76193e+06	3.77174e+06	5.47127e+06	1.13513	0.0768256	0.119242	134.119	7.06737	up
XMW0705	GC-MS	C15H26O	2-Naphthalenemethanol, 1,2,3,4,4a,5,6,8a-octahydro-.alpha.,.alpha.,4a,8-tetramethyl-, [2R-(2.alpha.,4a.alpha.,8a.beta.)]-	[2R-（2α，4a ，8aβ]]-1,2,3,4,4a，5,6,8a-八氢-α，α，4a，8-四甲基-2-萘甲醇	Terpenoids	萜类	-	-	473-16-5	1464.08	1251.81	1203.03	14133	14023.5	13347.4	1.15471	0.000112189	0.00547543	10.5907	3.40472	up
WMW0149	GC-MS	C15H26O	Cedrol	雪松	Terpenoids	萜类	-	-	77-53-2	13625.1	11683.4	65050.7	1.85034e+06	1.15234e+06	1.65793e+06	1.11566	0.0175987	0.0494017	51.5787	5.6887	up
NMW0350	GC-MS	C13H18O3	(S,E)-4-Hydroxy-3,5,5-trimethyl-4-(3-oxobut-1-en-1-yl)cyclohex-2-enone	（S，E）-4-羟基-3,5,5-三甲基-4-（3-氧代丁-1-烯-1-基）环己-2-烯酮	Terpenoids	萜类	-	-	39763-33-2	1580.08	557.466	1574.47	29609	21894.1	23698.7	1.12699	0.0083513	0.0396779	20.259	4.34049	up
XMW0627	GC-MS	C12H14O4	Diethyl Phthalate	邻苯二甲酸二乙酯	Ester	酯	-	-	84-66-2	5959.08	3109.25	3522.57	810948	557303	670961	1.15236	0.0115767	0.0415108	161.959	7.33949	up
XMW1017	GC-MS	C16H28	1,E-11,Z-13-Hexadecatriene	Z-13-十六碳三烯-E-11-1	Hydrocarbons	烃类	-	-	80634-97-5	29527.9	20112.9	51551.2	2.10948e+06	4.46268e+06	6.18617e+06	1.13757	0.07025	0.111343	126.08	6.9782	up
XMW1167	GC-MS	C15H24O	(1R,3E,7E,11R)-1,5,5,8-Tetramethyl-12-oxabicyclo[9.1.0]dodeca-3,7-diene	（1R，3E，7E，11R）-1,5,5,8-四甲基-12-氧杂双环[9.1.0]十二烷基-3,7-二烯	Terpenoids	萜类	-	-	19888-34-7	8782.69	9897.3	38572.1	1.49386e+06	1.53576e+06	2.05854e+06	1.13067	0.0113537	0.0413481	88.8729	6.47367	up
D337	GC-MS	C15H24O	2H-2a,7-Methanoazuleno[5,6-b]oxirene, octahydro-3,6,6,7a-tetramethyl-	α-雪松烯环氧化物	Terpenoids	萜类	-	-	29597-36-2	9	9	2707.42	115147	184263	227718	1.03788	0.0333236	0.068409	193.412	7.59553	up
XMW0054	GC-MS	C15H24O	Farnesene epoxide, E-	E-法呢烯环氧化物	Terpenoids	萜类	-	-	83637-40-5	12127.6	14702.7	29459.8	1.30656e+06	2.96818e+06	3.86858e+06	1.13772	0.0695	0.110748	144.667	7.17659	up
XMW1180	GC-MS	C15H24O	(1R,1aR,2aS,5R,6R,6aS,7aS)-1,6,6a-trimethyldecahydro-1,2a-methanocyclopropa[b]naphthalen-5-ol	（1R，1aR，2aS，5R，6R，6aS，7aS）-1,6,6a-三甲基十氢-1,2-a-甲基环丙烷[b]萘-5-醇	Terpenoids	萜类	-	-	860769-47-7	1.01339e+07	4.3525e+06	1.35122e+07	25130.5	6710.77	7827	1.14016	0.0733933	0.115033	0.0014168	-9.46315	down
D177	GC-MS	C15H24O	(1aR,1bS,2aS,5S,5aS,7aS)-2,2,5,7a-Tetramethyldecahydrocyclopenta[2',3']cyclobuta[1',2':3,4]benzo[1,2-b]oxirene	（1aR，1bS，2aS，5S，5aS，7aS）-2,2,2,5,7a-四甲基十氢环戊[2'，3']环丁[1'，2'：3,4]苯并[1,2-b]环氧乙烷	Terpenoids	萜类	-	-	104188-24-1	4093.42	2678.02	19633.1	63437.3	55487.8	68205.2	1.02277	0.00206605	0.0230251	7.08704	2.82518	up
w05	GC-MS	C15H24O	2,6,10-Dodecatrienal, 3,7,11-trimethyl-	3,7,11-三甲基-2,6,10-十二烷基	Terpenoids	萜类	-	-	19317-11-4	9	9	9	117167	214551	117685	1.15451	0.0436764	0.0798023	16644.6	14.0228	up
XMW0288	GC-MS	C15H24O	Cyclopenta[c]pentalen-3(3aH)-one, octahydro-1,2,3a,6-tetramethyl-	八氢-1,2,3a，6-四甲基-环戊[c]戊烯-3（3aH）-酮	Ketone	酮	-	-	120052-69-9	3648.98	2987.58	3515.88	45650.3	62576	56663	1.15171	0.00903125	0.0401646	16.2413	4.0216	up
NMW0319	GC-MS	C15H24O	2,6,10-Dodecatrienal, 3,7,11-trimethyl-, (E,E)-	（E，E）-3,7,11-三甲基-2,6,10-十二烷基	Hydrocarbons	烃类	-	-	502-67-0	25064.5	12605	84359.9	1.45117e+06	1.45774e+06	1.91115e+06	1.11087	0.00826155	0.0395519	39.4992	5.30375	up
KMW0636	GC-MS	C15H24O	1H-3a,7-Methanoazulen-5-ol, octahydro-3,8,8-trimethyl-6-methylene-	雪松醇	Alcohol	醇	-	-	28231-03-0	14324.2	11832.8	63067.6	1.59582e+06	1.48233e+06	2.05376e+06	1.12051	0.0101065	0.0410063	57.5167	5.84591	up
XMW1177	GC-MS	C15H24O	11,11-Dimethyl-4,8-dimethylenebicyclo[7.2.0]undecan-3-ol	11,11-二甲基-4,8-​​二亚甲基双环[7.2.0]十一碳三醇	Alcohol	醇	-	-	79580-01-1	15230.9	7343.45	19284.2	278027	320498	271548	1.13509	0.00205532	0.0230251	20.786	4.37754	up
D318	GC-MS	C15H24O	.beta.-Oplopenone	β-奥普拉酮	Terpenoids	萜类	-	-	28305-60-4	14158.3	10984.6	43957.4	898377	745726	977602	1.12616	0.00543355	0.03589	37.9406	5.24567	up
D428	GC-MS	C15H24O	6-Methyl-2-(4-methylcyclohex-3-en-1-yl)hepta-1,5-dien-4-ol	6-甲基-2-（4-甲基环己-3-烯-1-基）庚-1,5-二烯-4-醇	Terpenoids	萜类	-	-	38142-56-2	51031.6	38930	248265	3.24504e+06	2.66988e+06	3.65014e+06	1.10019	0.00608949	0.0364483	28.28	4.82171	up
XMW1035	GC-MS	C15H24O	(-)-Spathulenol	（-）-芦丁烯醇	Terpenoids	萜类	-	-	77171-55-2	9	9	2471.67	50832.7	43268.1	49093.2	1.00558	0.000860878	0.0154229	57.5152	5.84587	up
D419	GC-MS	C15H24O	2-Penten-1-ol, 2-methyl-5-(2-methyl-3-methylenebicyclo[2.2.1]hept-2-yl)-, [1S-[1.alpha.,2.alpha.(E),4.alpha.]]-	反β-檀香醇	Terpenoids	萜类	-	-	37172-32-0	22800.6	9167.47	35847.2	999974	1.04937e+06	1.34242e+06	1.13237	0.00890394	0.0400108	50.0147	5.64428	up
WMW0022	GC-MS	C15H24O	Salvial-4(14)-en-1-one	丹参酮	Terpenoids	萜类	-	-	73809-82-2	12373.6	5625.09	10431.6	2.14462e+06	1.50062e+06	1.79311e+06	1.15095	0.0104837	0.0410063	191.287	7.57959	up
D254	GC-MS	C15H24O	2H-2,4a-Methanonaphthalen-8(5H)-one, 1,3,4,6,7,8a-hexahydro-1,1,5,5-tetramethyl-	1，1,3,4,6,7,8a-六氢-1,1,5,5-四甲基-2H-2,4a-甲烷萘-8（5H）酮	Terpenoids	萜类	-	-	23787-90-8	6480.43	6830.28	6351.12	690419	1.27906e+06	1.79123e+06	1.14871	0.0593145	0.0969448	191.269	7.57946	up
XMW0203	GC-MS	C14H20O2	2,5-di-tert-Butyl-1,4-benzoquinone	1,5-二叔丁基-1,4-苯醌	Aromatics	芳烃	-	-	2460-77-7	1135.2	480.314	919.045	201381	135005	167913	1.15015	0.0128653	0.0436262	198.969	7.6364	up
XMW0479	GC-MS	C13H16O3	cis-3-Hexenyl salicylate	顺-3-己烯基水杨酸酯	Ester	酯	-	-	65405-77-8	34532.9	23632.9	45598.1	1.21358e+06	1.15335e+06	1.64847e+06	1.14753	0.0138946	0.045042	38.6975	5.27417	up
XMW1421	GC-MS	C13H16O3	3,4-Hexanedione, 1-(phenylmethoxy)-	1-（苯甲氧基）-3,4-己二酮	Ketone	酮	-	-	118006-73-8	214753	48381.3	334941	6.18242e+06	6.08943e+06	9.47921e+06	1.10282	0.0235743	0.05677	36.3684	5.18461	up
NMW0247	GC-MS	C15H22O	Furan, 3-(4,8-dimethyl-3,7-nonadienyl)-, (E)-	（E）-3-（4,8-二甲基-3,7-壬二烯基）-呋喃	Terpenoids	萜类	-	-	23262-34-2	5057.27	4962.23	4514.63	222273	509612	226184	1.14452	0.0805901	0.123665	65.9186	6.04261	up
NMW0308	GC-MS	C15H22O	2,6,9,11-Dodecatetraenal, 2,6,10-trimethyl-	2,6,10-三甲基-2,6,9,11-十二碳烯醛	Terpenoids	萜类	-	-	4955-32-2	55292.5	12935.6	64488.4	4.16743e+06	3.89269e+06	5.4063e+06	1.12993	0.0107256	0.0411633	101.468	6.66488	up
XMW0754	GC-MS	C15H22O	Methanol, (cyclohexyl)(2,3-dimethylphenyl)-	（环己基）（2,3-二甲基苯基）-甲醇	Alcohol	醇	-	-	349498-47-1	764223	710444	840534	189036	125280	154206	1.14033	0.000820787	0.0154229	0.202368	-2.30495	down
XMW1000	GC-MS	C15H22O	(E)-5-((1R,3R,6S)-2,3-Dimethyltricyclo[2.2.1.02,6]heptan-3-yl)-2-methylpent-2-enal	（E）-5-（（（1R，3R，6S）-2,3-二甲基三环[2.2.1.02,6]庚基-3-基）-2-甲基-戊-2-烯	Terpenoids	萜类	-	-	19903-70-9	53533.1	36651.7	45621.3	2158399	1941937	2825150	1.15275	0.0134886	0.0443812	50.9954	5.6723	up
D438	GC-MS	C15H22O	Sesquirosefuran	倍半乳糖呋喃	Heterocyclic compound	杂环化合物	-	-	39007-93-7	2252.23	2773.03	1849.58	567191	1.41095e+06	495290	1.14672	0.107599	0.154076	359.781	8.49097	up
XMW1022	GC-MS	C15H22O	3,7-Cyclodecadien-1-one, 3,7-dimethyl-10-(1-methylethylidene)-, (E,E)-	（E，E）-3,7-二甲基-10-（1-甲基亚乙基）-3,7-环十二烷基-1-酮	Terpenoids	萜类	-	-	6902-91-6	16472.7	10866.8	25611.9	674252	673978	743979	1.14522	0.000840914	0.0154229	39.5118	5.30421	up
XMW0205	GC-MS	C15H10N2	Benzimidazo[2,1-a]isoquinoline	苯并咪唑[2,1-a]异喹啉	Heterocyclic compound	杂环化合物	-	-	239-44-1	11007.1	10622.9	15218.8	82618.5	57578.2	60088.8	1.13555	0.0179809	0.0498305	5.43533	2.44237	up
w44	GC-MS	C11H20O4	Butanoic acid, 2-butoxy-1-methyl-2-oxoethyl ester	丁酸2-丁氧基-1-甲基-2-氧乙酯	Ester	酯	-	-	7492-70-8	3513.61	6224.1	12341.7	207513	414386	269980	1.12633	0.0416386	0.0777236	40.3942	5.33608	up
KMW0726	GC-MS	C14H30O	1-Tetradecanol	十四醇	Alcohol	醇	-	-	112-72-1	16976.5	11973.9	13279.8	908966	945706	1.29806e+06	1.15336	0.0139996	0.0452157	74.6559	6.22218	up
XMW1253	GC-MS	C13H26O2	Butanoic acid, 1-methyloctyl ester	1-甲基辛酯-丁酸	Ester	酯	-	-	69727-42-0	69845.4	57235.3	104320	568067	360372	430384	1.12238	0.0208721	0.0534397	5.87217	2.55389	up
D204	GC-MS	C13H26O2	Pentyl octanoate	辛酸戊酯	Ester	酯	-	-	638-25-5	38800.8	27439.9	29451.7	1.80898e+07	2.11083e+07	1.40714e+07	1.15449	0.0129665	0.0436262	556.674	9.12069	up
XMW1345	GC-MS	C13H26O2	Octanoic acid, 3-methylbutyl ester	3-甲基丁酯辛酸	Ester	酯	-	-	2035-99-6	31639.4	31735.4	59265.3	3.10843e+06	5.03226e+06	7.04168e+06	1.14499	0.0475399	0.0830295	123.796	6.95182	up
XMW0419	GC-MS	C15H32	Tetradecane, 2-methyl-	二甲基十六烷	Hydrocarbons	烃类	-	-	1560-95-8	2634.11	1479.51	787.471	195372	121397	132235	1.14253	0.0233758	0.0567283	91.6132	6.51748	up
XMW0200	GC-MS	C15H32	Tetradecane, 4-methyl-	四甲基十四烷	Hydrocarbons	烃类	-	-	25117-24-2	2406.26	1547.76	2263.57	186571	124228	126098	1.15182	0.0197291	0.0522049	70.268	6.1348	up
D399	GC-MS	C14H28O	cis-9-Tetradecen-1-ol	豆蔻醇	Alcohol	醇	-	-	35153-15-2	17208.3	15369.2	15724.6	937698	962990	1.39701e+06	1.15378	0.0184181	0.0506425	68.2723	6.09323	up
D382	GC-MS	C14H28O	Myristoleyl Alcohol	麦里斯托利醇	Alcohol	醇	-	-	34010-15-6	17390.6	11973.9	14372.4	933958	966012	1.17663e+06	1.15405	0.00560454	0.0359386	70.3434	6.13634	up
XMW0062	GC-MS	C13H22O2	2-Propenoic acid, 2-methyl-, 3,3,5-trimethylcyclohexyl ester	甲基丙烯酸 3,3,5-三甲基环己酯	Ester	酯	-	-	7779-31-9	9	9	9	74667.9	96044.6	78961.6	1.15556	0.00609893	0.0364483	9247.19	13.1748	up
D354	GC-MS	C13H22O2	3-Cyclohexene-1-carboxAldehyde, 4-(4-hydroxy-4-methylpentyl)-	4-（4-羟基-4-甲基戊基）-3-环己烯-1-甲醛	Aldehyde	醛	-	-	31906-04-4	49074.2	43264.5	48313	1.40873e+06	3.64401e+06	5.86894e+06	1.13237	0.107972	0.154358	77.6505	6.27892	up
KMW0639	GC-MS	C13H20O2	3-Buten-2-one, 4-(2,2,6-trimethyl-7-oxabicyclo[4.1.0]hept-1-yl)-	环氧-β-紫罗兰酮	Terpenoids	萜类	-	-	23267-57-4	45253.1	27693.6	55942.8	1.16005e+07	1.60667e+07	7.40598e+06	1.14845	0.0431242	0.0791737	272.118	8.08809	up
NMW0258	GC-MS	C12H17NO2	Fenobucarb	异丁威	Ester	酯	-	-	3766-81-2	18547.1	16122.7	84127.3	1.8967e+06	1.71277e+06	2.37481e+06	1.11845	0.00934098	0.0406523	50.374	5.65461	up
XMW1336	GC-MS	C11H13NO3	N-Benzyloxy-2-carbomethoxyaziridine	1-苯基甲氧基氮丙啶-2-羧酸甲酯	Ester	酯	-	-	53084-33-6	306877	314407	342625	7.05859e+06	4.24999e+06	5.81397e+06	1.15023	0.0219914	0.054609	17.7637	4.15086	up
XMW0195	GC-MS	C15H26	1H-Cycloprop[e]azulene, decahydro-1,1,4,7-tetramethyl-, [1aR-(1a.alpha.,4.beta.,4a.beta.,7.beta.,7a.beta.,7b.alpha.)]-	十氢-1,1,4,7-四甲基-1H-环丙烯腈	Terpenoids	萜类	-	-	28580-43-0	4068.53	3950.9	7613.87	96205.8	53276.7	61140.2	1.1305	0.0378647	0.0732691	13.4727	3.75197	up
XMW1364	GC-MS	C15H26	7-Octylidenebicyclo[4.1.0]heptane	7-辛二烯双环[4.1.0]庚烷	Terpenoids	萜类	-	-	82253-11-0	405034	246333	614082	8.24373e+06	8.38761e+06	6.93528e+06	1.13667	0.0026057	0.0257471	18.6231	4.21902	up
D216	GC-MS	C14H22O	.alpha.-Irone	甲基Α-紫罗兰酮	Ketone	酮	-	-	79-69-6	3.6767e+06	2.90944e+06	6.67746e+06	8.69104e+07	6.32459e+07	7.15336e+07	1.13643	0.00841729	0.0396779	16.7142	4.063	up
D352	GC-MS	C14H22O	2-Butenal, 2-methyl-4-(2,6,6-trimethyl-1-cyclohexen-1-yl)-	2-甲基-4-（2,6,6-三甲基-1-环己烯-1-基）-2-丁烯醛	Aldehyde	醛	-	-	3155-71-3	41307.9	27154.4	29269	1.00393e+06	1.64039e+06	1.46678e+06	1.14937	0.0195243	0.0521341	42.0654	5.39456	up
XMW0473	GC-MS	C13H18O2	Benzoic acid, hexyl ester	苯甲酸己酯	Ester	酯	-	-	6789-88-4	9	9	9	804534	1.4863e+06	1.21484e+06	1.15506	0.027574	0.0613015	129840	16.9864	up
NMW0265	GC-MS	C13H18O2	Ibuprofen	布洛芬	Acid	酸	-	-	15687-27-1	28769.5	22302.6	68365.1	1.23646e+06	2.74189e+06	4.00745e+06	1.12472	0.081939	0.125189	66.8619	6.06311	up
D156	GC-MS	C13H18O2	Propanoic acid, 2-methyl-, 3-phenylpropyl ester	2-甲基-丙酸3-苯基丙基酯	Ester	酯	-	-	103-58-2	68859.7	35856.4	97806.5	1.20083e+06	710855	854885	1.12235	0.0262526	0.0600597	13.6606	3.77194	up
XMW1016	GC-MS	C13H18O2	(4,4-Dimethyl-2,4,5,6-tetrahydro-1H-inden-2-yl)acetic Acid	（4,4-二甲基-2,4,5,6-四氢-1H-茚满-2-基）乙酸	Acid	酸	-	-	113522-67-1	14267.4	11171.3	17188.1	135861	177012	187371	1.14558	0.0097877	0.0409664	11.7354	3.5528	up
XMW0040	GC-MS	C12H14O3	Phenol, 2-methoxy-4-(1-propenyl)-, acetate	乙酸异丁香酚酯	Ester	酯	-	-	93-29-8	4629.74	4717.96	6351.12	593202	988412	1.39515e+06	1.14906	0.050855	0.0862279	189.617	7.56695	up
KMW0566	GC-MS	C15H24	(4aR-trans)-decahydro-4a-methyl-1-methylene-7-(1-methylethylidene)-Naphthalene	γ-芹子烯	Terpenoids	萜类	-	-	515-17-3	108706	65649.4	131795	2.52565e+07	3.28167e+07	1.70587e+07	1.1494	0.0317047	0.0665534	245.409	7.93904	up
XMW0197	GC-MS	C15H24	(1S,4S,4aS)-1-Isopropyl-4,7-dimethyl-1,2,3,4,4a,5-hexahydronaphthalene	（1S，4S，4aS）-1-异丙基-4,7-二甲基-1,2,3,4,4a，5-六氢萘	Terpenoids	萜类	-	-	267665-20-3	430576	256590	123135	2.85321e+07	1.7515e+07	2.17155e+07	1.14115	0.0200029	0.0524681	83.6265	6.38589	up
KMW0559	GC-MS	C15H24	Bicyclo[7.2.0]undec-4-ene, 4,11,11-trimethyl-8-methylene-,[1R-(1R*,4Z,9S*)]-	异烟碱	Terpenoids	萜类	-	-	118-65-0	25616.9	20689.7	37408.4	2.19123e+06	1.25723e+06	1.52215e+06	1.14843	0.0278613	0.0616953	59.3754	5.89179	up
KMW0582	GC-MS	C15H24	.beta.-Guaiene	β-番石榴烯	Terpenoids	萜类	-	-	88-84-6	482915	302726	245645	1.69528e+07	1.15621e+07	1.3985e+07	1.14893	0.0123438	0.0426092	41.2105	5.36494	up
XMW0264	GC-MS	C15H24	Bicyclo[4.4.0]dec-1-ene, 2-isopropyl-5-methyl-9-methylene-	2-异丙基-5-甲基-9-亚甲基-双环[4.4.0]癸-1-烯	Terpenoids	萜类	-	-	150320-52-8	2.64309e+07	2.4489e+07	8.28833e+06	9.06591e+08	6.91474e+08	8.10933e+08	1.13524	0.00591287	0.036405	40.6869	5.34649	up
XMW0468	GC-MS	C15H24	Bicyclo[3.1.1]hept-2-ene, 2,6-dimethyl-6-(4-methyl-3-pentenyl)-	2,6-二甲基-6-（4-甲基-3-戊烯基）-双环[3.1.1]庚-2-烯	Terpenoids	萜类	-	-	17699-05-7	3.13214e+07	3.68922e+07	4.07009e+07	9	9	9	1.15592	0.00558065	0.0359386	2.47901e-07	-21.9437	down
w38	GC-MS	C15H24	1H-3a,7-Methanoazulene, octahydro-3,8,8-trimethyl-6-methylene-, [3R-(3.alpha.,3a.beta.,7.beta.,8a.alpha.)]-	Β-雪松烯	Terpenoids	萜类	-	-	546-28-1	1.94349e+06	1.1981e+06	2.57231e+06	7.75804e+07	4.49221e+07	5.59566e+07	1.14223	0.0264704	0.0602262	31.2325	4.96497	up
D300	GC-MS	C15H24	Aristolochene	马兜铃属	Terpenoids	萜类	-	-	26620-71-3	73885.3	62334.2	67215.9	6.16726e+07	8.00638e+07	1.14883e+07	1.13457	0.130544	0.177941	753.187	9.55686	up
XMW0382	GC-MS	C15H24	isoledene	（-)-异喇叭烯	Terpenoids	萜类	-	-	95910-36-4	81874.4	115182	138631	2.19494e+06	1.39369e+06	1.59356e+06	1.14302	0.0210875	0.0536967	15.4375	3.94837	up
GMW0078	GC-MS	C15H24	.beta.-Bisabolene	β-红没药烯	Terpenoids	萜类	-	-	495-61-4	1.26408e+06	1.1203e+06	497575	4.70726e+07	3.78513e+07	4.0863e+07	1.14363	0.00413143	0.0314239	43.6464	5.44779	up
XMW0743	GC-MS	C15H24	(-)-Aristolene	（-）-马兜铃烯	Terpenoids	萜类	-	-	6831-16-9	6.60133e+06	3.90648e+06	1.19893e+07	7.11049e+07	1.08455e+08	1.49645e+08	1.11048	0.0445029	0.0804452	14.6333	3.87118	up
XMW0549	GC-MS	C15H24	(1S,4aR,7R)-1,4a-Dimethyl-7-(prop-1-en-2-yl)-1,2,3,4,4a,5,6,7-octahydronaphthalene	（1S，4aR，7R）-1,4a-二甲基-7-（丙烯基）-1,2,3,4,4a，5,6,7-八氢萘	Terpenoids	萜类	-	-	52026-55-8	194442	138373	327073	1.41803e+07	2.32038e+07	3.14886e+07	1.14274	0.0450594	0.0806779	104.37	6.70557	up
KMW0555	GC-MS	C15H24	trans-.alpha.-Bergamotene	（E）-α-佛手柑	Terpenoids	萜类	-	-	13474-59-4	1.50502e+07	6.97598e+06	2.01773e+07	9	9	9	1.1548	0.067173	0.107981	6.39757e-07	-20.576	down
XMW0182	GC-MS	C15H24	(3S,3aS,6R,8aS)-3,8,8-Trimethyl-7-methyleneoctahydro-1H-3a,6-methanoazulene	吡嗪烯	Terpenoids	萜类	-	-	31145-21-8	2.58823e+06	1.89856e+06	4.45159e+06	1.23268e+08	2.01546e+08	2.74685e+08	1.13999	0.0459112	0.0812347	67.0701	6.0676	up
XMW0469	GC-MS	C15H24	(1R,3aS,8aS)-7-Isopropyl-1,4-dimethyl-1,2,3,3a,6,8a-hexahydroazulene	愈创木6,9-二烯	Terpenoids	萜类	-	-	36577-33-0	6.60287e+06	3.9078e+06	1.19981e+07	7.11049e+07	1.08455e+08	1.49645e+08	1.11044	0.0445035	0.0804452	14.6257	3.87043	up
WMW0012	GC-MS	C15H24	(+)-epi-Bicyclosesquiphellandrene	（+）-表-双环倍半萜类烯	Terpenoids	萜类	-	-	54274-73-6	57312.2	45451.3	36891.3	1.47432e+08	1.70405e+08	9.52671e+06	1.11773	0.162073	0.211405	2344.09	11.1948	up
XMW0234	GC-MS	C15H24	cis-.alpha.-Bergamotene	顺式-α-香柠檬烯	Terpenoids	萜类	-	-	18252-46-5	1.26068e+06	612632	1.8205e+06	1.73311e+07	1.0742e+07	1.25353e+07	1.1127	0.0218364	0.0545766	10.9936	3.4586	up
D353	GC-MS	C15H24	(S,1Z,6Z)-8-Isopropyl-1-methyl-5-methylenecyclodeca-1,6-diene	（1Z，6Z，8S）-1-甲基-5-亚甲基-8-丙-2-基环癸-1,6-二烯	Terpenoids	萜类	-	-	317819-80-0	3.2191e+06	2.01427e+06	5.42025e+06	7.91958e+07	1.09438e+08	1.44001e+08	1.13432	0.0288105	0.0627567	31.2227	4.96453	up
WMW0052	GC-MS	C15H24	(E)-1-Methyl-4-(6-methylhept-5-en-2-ylidene)cyclohex-1-ene	（E）-1-甲基-4-（6-甲基庚-5-烯-2-亚烷基）环己-1-烯	Terpenoids	萜类	-	-	53585-13-0	3.11588e+06	2.11475e+06	4.96279e+06	8.69282e+07	9.95301e+07	7.61281e+07	1.14108	0.00579959	0.036405	25.7604	4.68708	up
D338	GC-MS	C15H24	1-methyl-4-(1,2,2-trimethylcyclopentyl)cyclohexa-1,3-diene	1-甲基-4-(1,2,2-三甲基环戊基)环己-1,3-二烯	Terpenoids	萜类	-	-	29621-78-1	8.09899e+06	7.49337e+06	2.94417e+06	3.75994e+08	2.88179e+08	3.25601e+08	1.14216	0.0059564	0.036405	53.3959	5.73866	up
KMW0597	GC-MS	C15H24	.gamma.-Muurolene	γ-茂丁烯	Terpenoids	萜类	-	-	30021-74-0	9	9	9	1.47438e+08	1.68524e+08	1.16325e+08	1.15572	0.0108895	0.0411633	1.60107e+07	23.9325	up
KMW0548	GC-MS	C15H24	[1aR-(1a.alpha.,4.alpha.,4a.beta.,7b.alpha.)]-1a,2,3,4,4a,5,6,7b-octahydro-1,1,4,7-tetramethyl-1H-Cycloprop[e]azulene	(-)-alpha-古芸烯	Terpenoids	萜类	-	-	489-40-7	133589	94103.1	115616	1.40121e+07	7.57136e+06	9.03382e+06	1.15177	0.0353469	0.0705831	89.1829	6.47869	up
XMW0147	GC-MS	C15H24	1-Methyl-4-(6-methylhept-5-en-2-yl)cyclohexa-1,3-diene	1-甲基-4-（6-甲基庚-5-烯-2-基）环己-1,3-二烯	Terpenoids	萜类	-	-	451-55-8	67165.8	58360.5	66527.8	7.15681e+07	9.03565e+07	4.99986e+07	1.15414	0.0262233	0.0600597	1103.46	10.1078	up
KMW0509	GC-MS	C15H24	Cyclohexene, 4-ethenyl-4-methyl-3-(1-methylethenyl)-1-(1-methylethyl)-, (3R-trans)-	δ-榄香烯	Terpenoids	萜类	-	-	20307-84-0	82363	24177.7	97466.6	429379	479583	517833	1.06513	0.000307323	0.00879196	6.99385	2.80609	up
WMW0008	GC-MS	C15H24	Longifolene	长叶烯	Terpenoids	萜类	-	-	475-20-7	664946	469943	435328	6.99673e+07	3.84673e+07	4.58903e+07	1.15175	0.0331347	0.0683047	98.2825	6.61886	up
XMW0388	GC-MS	C15H24	(4aR,8aR)-5,8a-dimethyl-3-propan-2-ylidene-1,2,4,4a,7,8-hexahydronaphthalene	（4aR，8aR）-5,8a-二甲基-3-丙烷-2-亚烷基-1,2,4,4a，7,8-六氢萘	Terpenoids	萜类	-	-	6813-21-4	936314	382373	349365	1.40548e+07	1.01132e+07	1.18166e+07	1.13404	0.00840029	0.0396779	21.5728	4.43114	up
XMW1408	GC-MS	C15H24	1H-Cyclopropa[a]naphthalene, 1a,2,3,3a,4,5,6,7b-octahydro-1,1,3a,7-tetramethyl-, [1aR-(1a.alpha.,3a.alpha.,7b.alpha.)]-	[1aR-（1aα。，3a。 ，7b.α。）]-1a，2,3,3a，4,5,6,7b-八氢-1,1,3a，7-四甲基-1H-环丙烷[a]萘	Terpenoids	萜类	-	-	489-29-2	76347.2	39840.2	112295	4.02348e+06	2.10656e+06	2.68478e+06	1.13556	0.0370046	0.072402	38.5798	5.26977	up
D341	GC-MS	C15H24	Naphthalene, decahydro-1,6-bis(methylene)-4-(1-methylethyl)-, (4.alpha.,4a.alpha.,8a.alpha.)-	十氢-1,6-双（亚甲基）-4-（1-甲基乙基）-，（4α，4aα，8aα）-萘	Terpenoids	萜类	-	-	30021-46-6	41051.4	22949	22064.7	2.53749e+06	1.54042e+06	1.78702e+06	1.1494	0.0233409	0.056722	68.1452	6.09054	up
XMW0825	GC-MS	C15H24	Bicyclo[3.1.1]heptane, 6-methyl-2-methylene-6-(4-methyl-3-pentenyl)-, [1R-(1.alpha.,5.alpha.,6.beta.)]-	[1R-（1α，5α，6β）]-6-甲基-2-亚甲基-6-（4-甲基-3-戊烯基）-双环[3.1.1]庚烷	Terpenoids	萜类	-	-	55123-21-2	2.02943e+06	1.31816e+06	3.63005e+06	5.42606e+07	8.64886e+07	1.18743e+08	1.13151	0.0454181	0.0808588	37.1891	5.21681	up
KMW0622	GC-MS	C15H24	Cyclohexene, 3-(1,5-dimethyl-4-hexenyl)-6-methylene-, [S-(R*,S*)]-	β-倍半萜类烯	Terpenoids	萜类	-	-	20307-83-9	257033	150699	372928	1.39309e+07	2.17144e+07	1.31275e+07	1.14256	0.0280141	0.0617211	62.4763	5.96524	up
KMW0614	GC-MS	C15H24	Cubenene	卡丁二烯	Terpenoids	萜类	-	-	29837-12-5	1.55655e+06	1.06738e+06	2.49267e+06	5.04967e+07	5.94154e+07	4.37562e+07	1.142	0.00787285	0.0388329	30.0332	4.90849	up
KMW0210	GC-MS	C15H24	1H-Cyclopenta[1,3]cyclopropa[1,2]benzene, octahydro-7-methyl-3-methylene-4-(1-methylethyl)-, [3aS-(3a.alpha.,3b.beta.,4.beta.,7.alpha.,7aS*)]-	β-立方萜类烯	Terpenoids	萜类	-	-	13744-15-5	7504.64	2783.96	6653.46	35458.3	69042.9	116653	1.08503	0.101231	0.148219	13.0535	3.70637	up
KMW0603	GC-MS	C15H24	Germacrene D	大根香叶烯D	Terpenoids	萜类	-	-	23986-74-5	322190	219490	213262	1.47432e+08	1.70405e+08	1.163e+08	1.15435	0.0115736	0.0415108	575.059	9.16757	up
D293	GC-MS	C15H24	Cyclohexene, 4-[(1E)-1,5-dimethyl-1,4-hexadien-1-yl]-1-methyl-	4-[（（1E）-1,5-二甲基-1,4-己二-1-基] -1-甲基-环己烯	Terpenoids	萜类	-	-	25532-79-0	4.47892e+06	4.13162e+06	1.79912e+06	2.1129e+08	1.66248e+08	1.82402e+08	1.14489	0.00498996	0.0346674	53.7904	5.74928	up
WMW0053	GC-MS	C15H24	Benzene, 1-(1,5-dimethylhexyl)-4-methyl-	1-（1,5-二甲基己基）-4-甲基-苯	Terpenoids	萜类	-	-	1461-02-5	1.94714e+06	1.27399e+06	3.50819e+06	5.43242e+07	8.67506e+07	1.14954e+08	1.13244	0.0414993	0.077651	38.0468	5.2497	up
XMW0948	GC-MS	C15H24	Valerena-4,7(11)-diene	（4S，7R，7aR）-2,4,5,6,7,7a-六氢-3,7-二甲基-4-（2-甲基-1-丙烯-1-基）-1H-茚	Terpenoids	萜类	-	-	351222-66-7	123884	66785.8	67987	7.97921e+06	4.86016e+06	5.64018e+06	1.14946	0.0229519	0.0560869	71.4443	6.15875	up
WMW0004	GC-MS	C15H24	Ylangene	衣兰烯	Terpenoids	萜类	-	-	14912-44-8	85058.1	117789	133045	2.30218e+06	1.46558e+06	1.67059e+06	1.14531	0.0209361	0.0534654	16.1908	4.0171	up
KMW0556	GC-MS	C15H24	Naphthalene, decahydro-4a-methyl-1-methylene-7-(1-methylethenyl)-, [4aR-(4a.alpha.,7.alpha.,8a.beta.)]-	β-芹子烯	Terpenoids	萜类	-	-	17066-67-0	16633.9	13096.8	15898.4	6.21796e+07	7.4664e+07	2.92477e+06	1.1107	0.169962	0.21982	3063.14	11.5808	up
XMW0009	GC-MS	C15H24	Naphthalene, 1,2,4a,5,8,8a-hexahydro-4,7-dimethyl-1-(1-methylethyl)-, [1S-(1.alpha.,4a.beta.,8a.alpha.)]-	Β-卡丁烯	Terpenoids	萜类	-	-	523-47-7	2.63463e+07	2.44257e+07	8.22938e+06	9.08885e+08	6.91343e+08	8.12123e+08	1.13513	0.00603736	0.0364483	40.8863	5.35355	up
XMW0143	GC-MS	C15H24	1H-3a,7-Methanoazulene, 2,3,4,7,8,8a-hexahydro-3,6,8,8-tetramethyl-, [3R-(3.alpha.,3a.beta.,7.beta.,8a.alpha.)]-	（-)-α-柏木烯	Terpenoids	萜类	-	-	469-61-4	1.26068e+06	615323	1.82218e+06	1.73311e+07	1.07433e+07	1.25353e+07	1.11289	0.0218368	0.0545766	10.981	3.45694	up
XMW0131	GC-MS	C15H24	Di-epi-.alpha.-cedrene	双表-α-雪松烯	Terpenoids	萜类	-	-	50894-66-1	516998	390730	340620	5.72348e+07	3.15625e+07	3.75255e+07	1.15202	0.0329125	0.0681123	101.192	6.66095	up
KMW0478	GC-MS	C15H24	cis-.beta.-Farnesene	（Z）-β-法呢烯	Terpenoids	萜类	-	-	28973-97-9	346321	263538	598396	1.49921e+07	2.41388e+07	3.40128e+07	1.13945	0.0486203	0.0842465	60.5366	5.91974	up
WMW0223	GC-MS	C15H24	Cedrene	雪松烯	Terpenoids	萜类	-	-	11028-42-5	329716	155769	480309	2.34792e+06	1.66167e+06	1.81156e+06	1.08502	0.00741122	0.0383779	6.02731	2.59151	up
KMW0596	GC-MS	C15H24	Alloaromadendrene	阿古玛烯	Terpenoids	萜类	-	-	25246-27-9	2.36862e+07	1.27734e+07	4.34137e+07	5.17348e+06	3.44024e+06	3.58979e+06	1.06455	0.127755	0.175638	0.152786	-2.71042	down
XMW0033	GC-MS	C15H24	(1R,3aS,4aS,8aS)-1,4,4,6-Tetramethyl-1,2,3,3a,4,4a,7,8-octahydrocyclopenta[1,4]cyclobuta[1,2]benzene	（1R，3aS，4aS，8aS）-1,4,4,6-四甲基-1,2,3,3a，4,4a，7,8-八氢环戊[1,4]环丁[1,2]苯	Terpenoids	萜类	-	-	94535-52-1	539018	417847	351144	5.756e+07	3.17116e+07	3.77627e+07	1.1519	0.0329775	0.0681462	97.1203	6.6017	up
KMW0537	GC-MS	C15H24	Cyclohexane, 1-ethenyl-1-methyl-2,4-bis(1-methylethenyl)-, (1.alpha.,2.beta.,4.beta.)-	β-榄香烯	Terpenoids	萜类	-	-	33880-83-0	72517	64974.8	61993.3	9.41863e+06	5.23863e+06	6.31115e+06	1.15328	0.0312508	0.0659948	105.113	6.71579	up
XMW0975	GC-MS	C15H24	4-(1,5-dimethyl-1,4-hexadienyl)-1-methyl-Cyclohexene	4-（1,5-二甲基-1,4-己二烯基）-1-甲基-环己烯	Terpenoids	萜类	-	-	17627-44-0	4.46419e+06	4.11438e+06	1.74667e+06	2.11202e+08	1.65896e+08	1.82155e+08	1.14429	0.0050568	0.0349795	54.1637	5.75926	up
WMW0003	GC-MS	C15H24	Eremophilene	佛术烯	Terpenoids	萜类	-	-	10219-75-7	7293.56	6420.06	4391.31	694625	407110	577795	1.15177	0.0219673	0.054609	92.7664	6.53553	up
XMW0742	GC-MS	C15H24	10,10-Dimethyl-2,6-dimethylenebicyclo[7.2.0]undecane	10,10-二甲基-2,6-二亚甲基双环[7.2.0]十一烷	Terpenoids	萜类	-	-	357414-37-0	523097	471936	701515	6.96488e+07	1.01394e+08	1.34892e+08	1.15098	0.0328092	0.0680587	180.328	7.49448	up
D345	GC-MS	C14H20O	(3aR,6R,8aR)-7,7-Dimethyl-8-methylenehexahydro-1H-3a,6-methanoazulen-3(2H)-one	（3aR，6R，8aR）-7,7-二甲基-8-亚甲基六氢-1H-3a，6-甲磺腈-3（2H）-酮	Ester	酯	-	-	30557-76-7	50637.6	38666	245175	3.04441e+06	2.54406e+06	3.47768e+06	1.09925	0.0059668	0.036405	27.1053	4.7605	up
D119	GC-MS	C14H20O	2-Benzylidene-1-heptanol	2-苄叉基-1-庚醇	Alcohol	醇	-	-	101-85-9	43581.8	29059.1	27102.4	5.06005e+06	4.74977e+06	7.07069e+06	1.15331	0.0164923	0.04866	169.24	7.40292	up
XMW0552	GC-MS	C13H16O2	2,2'-Isopropylidenebis(5-methylfuran)	2,2'-异亚丙基双（5-甲基呋喃）	Heterocyclic compound	杂环化合物	-	-	59212-75-8	2.4678e+06	1.429e+06	4.359e+06	3.8511e+07	6.35761e+07	8.72701e+07	1.1195	0.0498286	0.0850815	22.9363	4.51956	up
XMW1176	GC-MS	C13H16O2	Benzeneacetic Acid, .alpha.-cyclopentyl-	α-环戊基-苯乙酸	Acid	酸	-	-	3900-93-4	13579.3	7043.9	13474.9	1.54857e+06	1.56968e+06	1.96213e+06	1.15121	0.00631993	0.0371375	148.993	7.2191	up
WMW0059	GC-MS	C13H16O2	E-2-Hexenyl benzoate	E-2-己烯基苯甲酸酯	Ester	酯	-	-	76841-70-8	11390.2	6477.21	19813.3	816252	1.49574e+06	1.22884e+06	1.1402	0.0274344	0.0610928	93.9692	6.55412	up
XMW0841	GC-MS	C13H16O2	1-Penten-3-one, 1-(4-methoxyphenyl)-4-methyl-	1-（4-甲氧基苯基）-4-甲基-1-戊烯-3-酮	Ketone	酮	-	-	103-13-9	100790	51001.6	42353.7	1.18893e+06	928554	996946	1.13714	0.00450009	0.0326722	16.0417	4.00376	up
XMW0861	GC-MS	C11H12N2O2	7-Methoxy-4-methyl-1,3-dihydro-2H-1,5-benzodiazepin-2-one	7-甲氧基-4-甲基-1,3-二氢-2H-1,5-苯并二氮杂-2-酮	Ketone	酮	-	-	64376-03-0	1710	851.995	2107.71	182646	197463	257917	1.14782	0.0116669	0.0415301	136.631	7.09414	up
D327	GC-MS	C15H22	(4R,4aR)-4,4a-Dimethyl-6-(prop-1-en-2-yl)-1,2,3,4,4a,7-hexahydronaphthalene	（4R，4aR）-4,4a-二甲基-6-（丙-1-烯-2-基）-1,2,3,4,4a，7-六氢萘	Terpenoids	萜类	-	-	28908-26-1	13941.6	10532.1	35951.3	122080	80871.8	119820	1.05781	0.0088917	0.0400108	5.3417	2.4173	up
KMW0626	GC-MS	C15H22	Naphthalene, 1,2,3,4-tetrahydro-1,6-dimethyl-4-(1-methylethyl)-, (1S-cis)-	去氢白菖烯	Terpenoids	萜类	-	-	483-77-2	433119	384950	185553	4.18555e+06	3.68457e+06	4.12351e+06	1.13295	0.000310255	0.00879196	11.9504	3.57898	up
KMW0620	GC-MS	C15H22	Benzene, 1-(1,5-dimethyl-4-hexenyl)-4-methyl-	α-姜黄素	Terpenoids	萜类	-	-	644-30-4	67335.6	58633.2	75452.7	7.16837e+07	9.04174e+07	1.02143e+07	1.12892	0.141415	0.189236	855.497	9.74062	up
XMW0227	GC-MS	C15H22	aR-Himachalene	aR-雪松烯	Terpenoids	萜类	-	-	19419-67-1	12734.8	9445.22	33417.3	122022	80968.1	119820	1.06223	0.00879252	0.0399155	5.80622	2.5376	up
XMW0992	GC-MS	C15H22	(2R,8R,8aS)-8,8a-Dimethyl-2-(prop-1-en-2-yl)-1,2,3,7,8,8a-hexahydronaphthalene	（2R，8R，8aS）-8,8a-二甲基-2-（丙-1-烯-2-基）-1,2,3,7,8,8a-六氢萘	Terpenoids	萜类	-	-	5090-61-9	67859.9	41238.6	27394	5.07097e+06	3.25208e+06	4.34513e+06	1.14815	0.0156021	0.0479399	92.8123	6.53624	up
XMW0262	GC-MS	C15H22	1,1,7,7a-Tetramethyl-1a,2,6,7,7a,7b-hexahydro-1H-cyclopropa[a]naphthalene	1,1,7,7a-四甲基-1a，2,6,7,7a，7b-六氢-1H-环丙烷[a]萘	Terpenoids	萜类	-	-	154098-14-3	106530	65782.9	178656	852695	1.26948e+06	1.64651e+06	1.10978	0.0358645	0.0709616	10.7379	3.42464	up
XMW0386	GC-MS	C15H22	cis-Calamenene	顺式卡拉曼烯	Terpenoids	萜类	-	-	72937-55-4	34759.9	22103.5	65968.5	556956	400790	530452	1.11892	0.00759147	0.0388329	12.1157	3.59881	up
D310	GC-MS	C15H22	(8R,8aS)-8,8a-Dimethyl-2-(propan-2-ylidene)-1,2,3,7,8,8a-hexahydronaphthalene	（8R，8aS）-8,8a-二甲基-2-（丙烷-2-亚烷基）-1,2,3,7,8,8a-六氢萘	Terpenoids	萜类	-	-	27840-40-0	75889.6	63545.8	242305	628626	376285	661286	1.00738	0.0220052	0.054609	4.36473	2.12589	up
XMW1164	GC-MS	C7H7BrO2	2-bromo-4-methoxy-Phenol	2-溴-4-甲氧基-苯酚	Halogenated hydrocarbons	卤代烃	-	-	17332-11-5	3191.35	1877.44	2588.22	31527.9	21930.1	23826.9	1.14221	0.0144286	0.0460091	10.0933	3.33533	up
KMW0542	GC-MS	C12H24O2	Decanoic acid, ethyl ester	癸酸乙酯	Ester	酯	-	-	110-38-3	9	9	9	17313.1	9690.88	11186.7	1.15495	0.0319946	0.0670818	1414.47	10.466	up
KMW0704	GC-MS	C15H20	.alpha.-Calacorene	Α-二去氢菖蒲烯	Terpenoids	萜类	-	-	21391-99-1	3146.18	1639.8	3033.14	18440.1	13409.7	16092.1	1.12267	0.00674386	0.0374105	6.13136	2.61621	up
XMW0136	GC-MS	C15H20	4-Isopropyl-6-methyl-1-methylene-1,2,3,4-tetrahydronaphthalene	4-异丙基-6-甲基-1-亚甲基-1,2,3,4-四氢萘	Terpenoids	萜类	-	-	50277-34-4	282759	109918	78453.7	759144	638483	731275	1.05181	0.00388921	0.030402	4.5187	2.17591	up
NMW0366	GC-MS	C13H12O2	3-phenoxy-Benzenemethanol	3-苯氧基-苯甲醇	Alcohol	醇	-	-	13826-35-2	37686	35732	40563	7165	7548	7406	1.15489	0.00198034	0.0227416	0.194059	-2.36544	down
XMW1163	GC-MS	C9H12O3S	Ethyl 2-hydroxybenzyl sulfone	2-羟基苄基砜-乙基	Phenol	酚	-	-	53380-27-1	33564.8	15769.4	26680.9	4.52284e+06	4.39384e+06	5.86579e+06	1.15152	0.00908482	0.0401646	194.468	7.60339	up
KMW0551	GC-MS	C14H30	Tetradecane	十四烷	Hydrocarbons	烃类	-	-	629-59-4	3267.84	3489.36	4537.41	335129	192837	229237	1.15137	0.028213	0.0618854	67.041	6.06697	up
w10	GC-MS	C13H26O	2-Undecanone, 6,10-dimethyl-	6,10-二甲基-2-十一烷酮	Ketone	酮	-	-	1604-34-8	490.057	1092.69	354.392	72317.8	40257.7	47328	1.14084	0.0323984	0.0675256	82.5463	6.36713	up
XMW1354	GC-MS	C12H22O2	cis-5-Dodecenoic Acid	顺-5-十二碳烯酸	Acid	酸	-	-	2430-94-6	14660.1	10605.5	12315	177759	194178	155594	1.15179	0.00430165	0.0321617	14.0373	3.8112	up
D153	GC-MS	C14H14O	Benzene, 1,1'-[oxybis(methylene)]bis-	1,1'-[氧双（亚甲基）]双-苯	Aromatics	芳烃	-	-	103-50-4	13082.6	3910.8	14791.7	289364	423223	322652	1.12277	0.0136786	0.0446045	32.5699	5.02547	up
w45	GC-MS	C14H28	2-Tetradecene, (E)-	（E）-2-十四碳烯	Hydrocarbons	烃类	-	-	35953-54-9	26933.7	21504.4	27717.7	2.36587e+06	1.35285e+06	1.6077e+06	1.15223	0.0289105	0.0627567	69.9411	6.12807	up
XMW1260	GC-MS	C13H24O	1-Cyclohexene-1-propanol, .alpha.,2,6,6-tetramethyl-	α，2,6,6-四甲基-1-环己烯-1-丙醇	Alcohol	醇	-	-	3293-47-8	80519.2	71374.4	132484	7.76728e+06	1.30292e+07	1.80317e+07	1.14583	0.049294	0.085031	136.537	7.09315	up
D361	GC-MS	C12H20O2	Ethyl geranate	香叶酸乙酯	Ester	酯	-	-	32659-21-5	9	9	9	49365.7	82641	51327.3	1.15471	0.0297427	0.0637291	6790.15	12.7292	up
NMW0142	GC-MS	C12H20O2	Cyclohexanol, 1-methyl-4-(1-methylethylidene)-, acetate	1-甲基-4-（1-甲基亚乙基）-环己醇乙酸酯	Ester	酯	-	-	10235-63-9	9	9	5469.09	227329	142072	240810	1.01171	0.0224011	0.0551372	111.209	6.79713	up
KMW0518	GC-MS	C12H20O2	2,6-Octadien-1-ol, 3,7-dimethyl-, acetate, (Z)-	乙酸橙花酯	Ester	酯	-	-	141-12-8	9462.94	5605.29	15908.8	155769	103815	142088	1.12229	0.0129973	0.0436262	12.9668	3.69675	up
WMW0219	GC-MS	C12H20O2	Isobornyl acetate	乙酸异冰片酯	Ester	酯	-	-	125-12-2	65731.1	17749.8	113120	1.03179e+06	634918	1.43844e+06	1.07189	0.0509417	0.0862279	15.7942	3.98132	up
D360	GC-MS	C12H20O2	Ethyl nerate	硝酸乙酯	Ester	酯	-	-	32659-20-4	9	9	9	49365.7	82641	51327.3	1.15471	0.0297427	0.0637291	6790.15	12.7292	up
WMW0175	GC-MS	C12H20O2	.delta.-Terpineol, acetate	δ-松油醇，醋酸盐	Terpenoids	萜类	-	-	93836-50-1	9	9	9	28333.6	18790.8	14945.3	1.15474	0.0350949	0.0705831	2298.88	11.1667	up
WMW0016	GC-MS	C12H20O2	(-)-Bornyl acetate	（-）-乙酸龙脑酯	Terpenoids	萜类	-	-	5655-61-8	66491.1	17677.8	117425	1.20868e+06	652935	1.45861e+06	1.07156	0.0468314	0.0822005	16.4698	4.04175	up
XMW0803	GC-MS	C12H20O2	Iso-3-thujyl acetate	异-3-叔丁基乙酸酯	Ester	酯	-	-	62181-90-2	95891.3	50067.2	147660	1.31289e+06	1.62829e+06	1.61938e+06	1.12611	0.0032411	0.0281719	15.5323	3.9572	up
WMW0089	GC-MS	C13H22O	5,9-Undecadien-2-one, 6,10-dimethyl-	6,10-二甲基-5,9-十一碳烯-2-酮	Ketone	酮	-	-	689-67-8	358770	399960	575521	4.25782e+07	6.96913e+07	9.54126e+07	1.14813	0.0458241	0.0812347	155.654	7.2822	up
KMW0563	GC-MS	C13H22O	5,9-Undecadien-2-one, 6,10-dimethyl-, (E)-	（E）-6,10-二甲基-5,9-十一碳烯-2-酮	Ketone	酮	-	-	3796-70-1	362041	390824	561551	4.25784e+07	6.96913e+07	9.54126e+07	1.14839	0.0458157	0.0812347	158.003	7.30381	up
w39	GC-MS	C13H22O	2-Butanone, 4-(2,6,6-trimethyl-2-cyclohexen-1-yl)-	4-（2,6,6-三甲基-2-环己烯-1-基）-2-丁酮	Ketone	酮	-	-	31499-72-6	69665.6	50492.4	58972.7	7.32185e+06	3.95787e+06	4.82916e+06	1.15208	0.0341952	0.0693917	89.9281	6.4907	up
XMW0198	GC-MS	C13H22O	3-Buten-2-ol, 4-(2,6,6-trimethyl-2-cyclohexen-1-yl)-, (3E)-	（3E）-4-（2,6,6-三甲基-2-环己烯-1-基）-3-丁烯-2-醇	Alcohol	醇	-	-	25312-34-9	362339	268843	658765	2.19621e+07	3.57664e+07	5.00314e+07	1.14029	0.0483534	0.0839495	83.5382	6.38436	up
XMW0423	GC-MS	C13H22O	6,8-Nonadien-2-one, 8-methyl-5-(1-methylethyl)-, (E)-	（E）-8-甲基-5-（1-甲基乙基）-6,8-壬二烯-2-酮	Ketone	酮	-	-	54868-48-3	30015.7	44459.5	46922.4	425951	271683	308844	1.13682	0.0227587	0.055869	8.29077	3.05151	up
D393	GC-MS	C12H18O2	1,3-Cyclohexadiene-1-carboxylic acid, 2,6,6-trimethyl-, ethyl ester	1,3-环己二烯-1-羧酸，2,6,6-三甲基-乙酯	Ester	酯	-	-	35044-59-8	7.52158e+06	9.11429e+06	9.8332e+06	9	9	9	1.15591	0.0059394	0.036405	1.02006e-06	-19.9029	down
D249	GC-MS	C11H14O3	Ethanol, 2-phenoxy-, propanoate	丙酸2-苯氧乙酯	Ester	酯	-	-	23495-12-7	123544	67234.3	162848	9	9	9	1.15421	0.0511974	0.0865772	7.63518e-05	-13.677	down
D362	GC-MS	C10H10O4	3,4-Methylenedioxybenzyl acetate	3,4-亚甲基二氧苄基乙酸酯	Ester	酯	-	-	326-61-4	250772	31399.2	78924.4	8.21822e+06	7.23333e+06	7.46855e+06	1.11814	0.00098395	0.0164648	63.4738	5.98809	up
NMW0291	GC-MS	C13H20O	Phenol, 4-heptyl-	4-庚基-苯酚	Phenol	酚	-	-	1987-50-4	27783.4	19440.7	21688.4	1.75456e+06	1.6737e+06	2424760	1.15348	0.0148932	0.0468948	84.9341	6.40827	up
XMW1256	GC-MS	C13H20O	2-Butanone, 4-(2,6,6-trimethyl-1,3-cyclohexadien-1-yl)-	4-（2,6,6-三甲基-1,3-环己二烯-1-基）-2-丁酮	Ketone	酮	-	-	20483-36-7	1.26115e+06	611940	1.81843e+06	1.73645e+07	1.07552e+07	1.26373e+07	1.11286	0.0216397	0.0543157	11.0407	3.46476	up
D425	GC-MS	C13H20O	3-Cyclohexene-1-carboxAldehyde, 4-(4-methyl-3-pentenyl)-	4-（4-甲基-3-戊烯基）-3-环己烯-1-甲醛	Aldehyde	醛	-	-	37677-14-8	21810.3	12438.5	7737.97	336892	240146	213980	1.13143	0.0206244	0.0532585	18.8397	4.2357	up
KMW0554	GC-MS	C13H20O	.alpha.-Ionone	α-紫罗兰酮	Terpenoids	萜类	-	-	127-41-3	1.49888e+06	647521	2.19425e+06	6.1166e+06	4.77543e+06	4.67728e+06	1.01934	0.00439723	0.0325989	3.58686	1.84272	up
NMW0184	GC-MS	C13H20O	Ionone	紫罗兰酮	Terpenoids	萜类	-	-	8013-90-9	1.49888e+06	646356	2.19425e+06	6.2899e+06	5.09221e+06	4.79336e+06	1.02563	0.0035177	0.0290359	3.72751	1.89821	up
D388	GC-MS	C12H16O2	Butanoic acid, 1-phenylethyl ester	丁酸1-苯乙基酯	Ester	酯	-	-	3460-44-4	83414.2	116217	148250	2.29998e+06	1.46384e+06	1.67607e+06	1.14199	0.0206786	0.0532733	15.6372	3.96691	up
XMW0858	GC-MS	C11H13FN2	6-fluoro-.beta.-methyl-1H-Indole-3-ethanAmine	6-氟-β-甲基-1H-吲哚-3-乙胺	Amine	胺	-	-	77590-52-4	1714.76	9	9	65265.2	160392	252844	1.05516	0.0991216	0.145494	276.15	8.10931	up
XMW0813	GC-MS	C12H17NO	Pentanal O-benzyloxime	邻苄基肟戊醛	Nitrogen compounds	含氮化合物	-	-	72399-21-4	10966.4	11206.4	26907.8	1.27795e+06	2.34515e+06	1.99092e+06	1.14244	0.0274198	0.0610928	114.384	6.83774	up
XMW0097	GC-MS	C14H22	1,5-Cycloundecadiene, 8,8-dimethyl-9-methylene-	8,8-二甲基-9-亚甲基-1,5-环癸二烯	Hydrocarbons	烃类	-	-	62338-54-9	447578	319880	182291	3.51608e+08	4.6165e+08	7.92074e+07	1.13736	0.120441	0.167417	939.685	9.87603	up
NMW0281	GC-MS	C12H14O2	3-Butylisobenzofuran-1(3H)-one	3-丁基异苯并呋喃-1（3H）-酮	Heterocyclic compound	杂环化合物	-	-	6066-49-5	5310.26	5047.05	9177.47	215103	311291	179898	1.14344	0.0280678	0.0617211	36.1556	5.17615	up
XMW0971	GC-MS	C12H14O2	Benzyl angelate	苯甲酸苄酯	Ester	酯	-	-	37526-87-7	2.32278e+06	1.63416e+06	4.20013e+06	7.74655e+07	1.23423e+08	1.70735e+08	1.13514	0.0459052	0.0812347	45.5585	5.50965	up
NMW0357	GC-MS	C11H10O3	7-Ethoxycoumarin	7-乙氧基香豆素	Heterocyclic compound	杂环化合物	-	-	31005-02-4	1.68591e+06	1.59567e+06	1.84572e+06	42079.9	35415	38877.3	1.15505	0.0018985	0.0223871	0.0226966	-5.46138	down
XMW0940	GC-MS	C13H16O	Benzenemethanol, .alpha.-2-cyclohexen-1-yl-	α.-2-环己烯-1-基-苯甲醇	Alcohol	醇	-	-	5723-89-7	4625.13	2510.74	4384.68	861022	578832	689007	1.15212	0.0132618	0.0441282	184.788	7.52973	up
NMW0255	GC-MS	C11H8O3	Plumbagin	白花丹醌	Phenol	酚	-	-	481-42-5	3210.72	2732.6	11981.3	195180	121797	110547	1.10707	0.0343289	0.0695685	23.8512	4.57599	up
KMW0629	GC-MS	C12H26O	1-Dodecanol	月桂醇	Alcohol	醇	-	-	112-53-8	94332.1	65530	95322.2	2.82216e+07	3.36639e+07	2.16601e+07	1.1535	0.0152657	0.0474732	327.393	8.35488	up
XMW1079	GC-MS	C11H22O2	Butanoic acid, 1-methylhexyl ester	庚烷-2-基丁酸酯	Ester	酯	-	-	39026-94-3	9	9	9	1.76217e+06	1.71375e+06	2.65097e+06	1.15564	0.0215369	0.0543157	226922	17.7918	up
NMW0363	GC-MS	C11H6O3	Ficusin	呋喃香豆素	Heterocyclic compound	杂环化合物	-	-	66-97-7	81352.5	75649.4	88814	4145.03	2550.34	3288.5	1.15034	0.00207056	0.0230251	0.0406153	-4.62183	down
XMW0242	GC-MS	C13H28	Undecane, 3,9-dimethyl-	3,9-二甲基-十一烷	Hydrocarbons	烃类	-	-	17301-31-4	437095	389049	485896	223141	175562	177975	1.12189	0.0040037	0.0310948	0.439528	-1.18597	down
XMW0099	GC-MS	C13H28	Decane, 2,3,5-trimethyl-	2,3,5-三甲基-癸烷	Hydrocarbons	烃类	-	-	62238-11-3	116144	82048.3	167890	639075	453068	512404	1.10589	0.00796949	0.0388329	4.38302	2.13193	up
XMW1399	GC-MS	C13H28	Decane, 2,5,9-trimethyl-	2,5,9-三甲基-癸烷	Hydrocarbons	烃类	-	-	62108-22-9	115261	62450.2	97882.6	236830	164861	222889	1.03221	0.0157419	0.0480184	2.26631	1.18034	up
KMW0545	GC-MS	C12H24O	Dodecanal	月桂醛	Aldehyde	醛	-	-	112-54-9	330357	158494	480150	2.34776e+06	1.66167e+06	1.80883e+06	1.08647	0.00754758	0.0388329	6.00439	2.58602	up
KMW0674	GC-MS	C12H24O	trans-2-Dodecen-1-ol	（E）-2-十二烯-1-醇	Alcohol	醇	-	-	69064-37-5	21711.2	16324.9	21115.3	8.15422e+06	9.2819e+06	6.62947e+06	1.15462	0.00909818	0.0401646	406.847	8.66834	up
XMW1401	GC-MS	C11H20O2	n-Valeric acid cis-3-hexenyl ester	顺-3-己烯基酯-正戊酸	Ester	酯	-	-	35852-46-1	9	9	9	55420.4	109451	66988.4	1.15428	0.0423292	0.0783692	8587.4	13.068	up
NMW0209	GC-MS	C11H20O2	Undecylenic Acid	十一碳烯酸	Acid	酸	-	-	112-38-9	8997.64	7267.24	18404.6	2.82429e+07	3.39373e+07	2.09786e+06	1.11596	0.160554	0.209891	1854.03	10.8564	up
XMW1403	GC-MS	C11H20O2	cis-3-Hexenyl isovalerate	顺-3-异戊基异戊酸酯	Ester	酯	-	-	35154-45-1	9	9	9	61633	105358	69547.8	1.15479	0.0278989	0.0616953	8760.68	13.0968	up
WMW0181	GC-MS	C11H20O2	4-Decenoic acid, methyl ester, Z-	Z-4-癸烯酸甲酯	Ester	酯	-	-	7367-83-1	1103.61	1817.54	1774.68	8209.93	8161.29	6670.92	1.1274	0.00217086	0.0234	4.90694	2.29482	up
KMW0637	GC-MS	C11H20O2	2H-Pyran-2-one, 6-hexyltetrahydro-	δ-十一内酯	Ester	酯	-	-	710-04-3	1938.02	1616.92	5369.83	85865.6	65586.9	72154.2	1.12619	0.00536672	0.035662	25.0546	4.647	up
XMW0128	GC-MS	C10H17NS	2-Butyl-5-propylthiazole	2-丁基-5-丙基噻唑	Heterocyclic compound	杂环化合物	-	-	52414-86-5	24020.8	11985.4	32458.2	295858	178171	211782	1.11381	0.0250074	0.0587406	10.0171	3.32439	up
D380	GC-MS	C11H18O2	3(2H)-Furanone, 2-hexyl-5-methyl-	2-己基-5-甲基-3（2H）-呋喃酮	Ketone	酮	-	-	33922-66-6	4209.64	5483.41	7404	123598	186297	251737	1.14158	0.0390413	0.0747229	32.8496	5.03781	up
KMW0449	GC-MS	C11H18O2	Bicyclo[2.2.1]heptan-2-ol, 1,7,7-trimethyl-, formate, endo-	甲酸冰片	Acid	酸	-	-	7492-41-3	9	9	9	1.37315e+06	1.09703e+06	1.76048e+06	1.15572	0.0181127	0.0501166	156691	17.2576	up
NMW0190	GC-MS	C12H23N	CyclohexanAmine, N-cyclohexyl-	N-环己基-环己胺	Amine	胺	-	-	101-83-7	47447.9	31584.1	87530.3	5158.18	3373.11	9348.22	1.08198	0.0951064	0.140777	0.107344	-3.21968	down
XMW0816	GC-MS	C11H19NO	1-Penten-3-one, 4-methyl-1-(1-piperidinyl)-	4-甲基-1-（1-哌啶基）-1-戊烯-3-酮	Ketone	酮	-	-	13606-83-2	530.982	1320.45	993.732	36439.1	17947.3	25174.4	1.13317	0.0413096	0.077461	27.9635	4.80547	up
XMW1158	GC-MS	C10H15NO2	Tricyclo[3.3.1.1(3,7)]decane, 2-nitro-	2-硝基-三环[3.3.1.1（3,7）]癸烷	Nitrogen compounds	含氮化合物	-	-	54564-31-7	964.432	9	9	220462	170549	269871	1.08839	0.0165596	0.0487358	672.699	9.39382	up
WMW0077	GC-MS	C13H24	1-Tridecyne	1-十三炔	Hydrocarbons	烃类	-	-	26186-02-7	9	9	9	1.96278e+06	2.43218e+06	2.29254e+06	1.15573	0.00387462	0.030402	247685	17.9181	up
XMW1129	GC-MS	C10H12O3	Ethyl mandelate	扁桃酸乙酯	Ester	酯	-	-	774-40-3	2.0315e+06	887404	2.95402e+06	9.06815e+06	7.11459e+06	6.93395e+06	1.03588	0.00337899	0.0287256	3.93615	1.97679	up
XMW0280	GC-MS	C10H12O3	Carbonic acid, phenyl propyl ester	碳酸苯丙酯	Ester	酯	-	-	13183-16-9	22047.2	5678.57	15591.4	113465	90313	144051	1.07944	0.016064	0.0483212	8.02981	3.00537	up
NMW0353	GC-MS	C9H9NO3	Hippuric Acid	N-苯甲酰甘氨酸	Acid	酸	-	-	495-69-2	1077193	583135	1233600	193655	150006	189408	1.10743	0.0561345	0.0931335	0.184203	-2.44063	down
KMW0511	GC-MS	C11H14O2	Butyl benzoate	苯甲酸丁酯	Ester	酯	-	-	136-60-7	80244.4	114017	137144	2.28208e+06	1.45162e+06	1.62552e+06	1.14305	0.0216334	0.0543157	16.1712	4.01535	up
D145	GC-MS	C11H14O2	Propanoic acid, 2-methyl-, phenylmethyl ester	2-甲基丙酸苄酯	Ester	酯	-	-	103-28-6	281627	132102	391277	3.57486e+06	4.51538e+06	4.12359e+06	1.12468	0.0030867	0.027812	15.1723	3.92337	up
XMW0553	GC-MS	C10H10O3	2-Acetoxyacetophenone	2-乙酰氧基苯乙酮	Aromatics	芳烃	-	-	7250-94-4	77611.5	70117	88710.7	7.2672e+06	3.94202e+06	4.803e+06	1.15164	0.0340743	0.0692922	67.7224	6.08156	up
KMW0574	GC-MS	C11H12O2	2-Propenoic acid, 3-phenyl-, ethyl ester	肉桂酸乙酯	Ester	酯	-	-	103-36-6	696072	416996	1.26098e+06	178595	77728.3	178861	1.02889	0.118759	0.165603	0.183309	-2.44765	down
XMW0364	GC-MS	C11H24O	6-Undecanol	6-十一烷醇	Alcohol	醇	-	-	23708-56-7	87087.8	55975.1	74038.8	13582.9	6538.34	9830.96	1.11971	0.0164686	0.04866	0.137964	-2.85764	down
KMW0523	GC-MS	C11H24O	1-Undecanol	十一烷醇	Alcohol	醇	-	-	112-42-5	3940.91	4547.42	3708.01	96752.2	64092.4	77262.2	1.15203	0.0154512	0.0479399	19.5228	4.28709	up
D141	GC-MS	C10H20O2	Acetic acid, 2-ethylhexyl ester	乙酸2-乙基己酯	Ester	酯	-	-	103-09-3	3636.75	1182.18	6781.86	75099.5	25388.8	85158.6	1.05753	0.0870991	0.131021	16.003	4.00027	up
XMW0073	GC-MS	C10H20O2	3-Methylheptyl acetate	3-甲基庚基乙酸酯	Ester	酯	-	-	72218-58-7	73212.9	38812.2	54480.4	146519	102990	136169	1.04084	0.0133264	0.0441282	2.31631	1.21183	up
D289	GC-MS	C10H20O2	n-Amyl isovalerate	戊基异戊酸酯	Ester	酯	-	-	25415-62-7	4676.75	2700.59	5220.72	109623	84976	147158	1.14261	0.025914	0.0599092	27.1277	4.7617	up
D240	GC-MS	C10H20O2	Propanoic acid, 2,2-dimethyl-, pentyl ester	丙酸2,2-二甲基戊酯	Ester	酯	-	-	2313-68-0	6098.85	7251.38	11346	1.04405e+06	845173	1.10717e+06	1.15146	0.00627492	0.0369968	121.33	6.92279	up
XMW1226	GC-MS	C10H20O2	Hexanoic acid, 2-methylpropyl ester	2-甲基丙酯-己酸	Ester	酯	-	-	105-79-3	23424.4	20992	16810	8898.12	11863.4	8604.69	1.07937	0.0159336	0.0481847	0.479633	-1.06	down
XMW1218	GC-MS	C10H20O2	2-Nonanone, 3-(hydroxymethyl)-	3-（羟甲基）-2-壬酮	Ketone	酮	-	-	67801-33-6	1402.86	868.974	1600.68	21315.4	18730.4	23922.1	1.14489	0.00481257	0.0338227	16.5184	4.04601	up
NMW0127	GC-MS	C10H18O2	6-Octenoic Acid, 3,7-dimethyl-	3,7-二甲基-6-辛烯酸	Acid	酸	-	-	502-47-6	9	9	9	126500	67819	75306.3	1.15521	0.0396173	0.0752591	9986.11	13.2857	up
XMW0304	GC-MS	C10H18O2	Butanoic acid, 5-hexenyl ester	丁酸5-己烯基酯	Ester	酯	-	-	108058-75-9	331357	272326	340644	152882	110604	101390	1.10623	0.00260735	0.0257471	0.386388	-1.37188	down
XMW0368	GC-MS	C9H14O3	2-Propenoic acid, 2-methyl-, (tetrahydro-2-furanyl)methyl ester	甲基丙烯酸四氢糠基酯	Ester	酯	-	-	2455-24-5	283739	242235	233351	128363	96954.7	96772.7	1.11648	0.00247099	0.0250956	0.42418	-1.23725	down
KMW0370	GC-MS	C11H20O	2-Methylisoborneol	甲基异冰片	Terpenoids	萜类	-	-	2371-42-8	97676.7	36550.4	247998	700094	568331	1.02041e+06	1.00472	0.0260886	0.0600319	5.98818	2.58212	up
NMW0149	GC-MS	C10H16O2	Geranic acid	香叶酸	Terpenoids	萜类	-	-	459-80-3	9	9	9	48644.2	82801.5	51335.6	1.15467	0.0309031	0.0655758	6769.68	12.7249	up
D110	GC-MS	C10H16O2	Bicyclo[3.1.1]heptan-3-one, 2-hydroxy-2,6,6-trimethyl-	2-羟基-2,6,6-三甲基-双环[3.1.1]庚-3-酮	Ketone	酮	-	-	10136-65-9	50826.6	37972.7	54946.8	244324	193060	301253	1.1323	0.0215882	0.0543157	5.13848	2.36134	up
NMW0101	GC-MS	C10H16O2	Ascaridole	阿斯利多	Terpenoids	萜类	-	-	512-85-6	9	9	9	75573.7	189428	84081.6	1.15309	0.0863948	0.130185	12929	13.6583	up
XMW0246	GC-MS	C10H16O2	OxiranecarboxAldehyde, 3-methyl-3-(4-methyl-3-pentenyl)-	3-甲基-3-（4-甲基-3-戊烯基）-环氧乙烷甲醛	Aldehyde	醛	-	-	16996-12-6	976598	788785	1.68057e+06	36621.6	41761.7	47818.3	1.14468	0.0552088	0.091945	0.0366231	-4.7711	down
XMW1465	GC-MS	C10H16O2	7-Oxabicyclo[4.1.0]heptan-2-one, 6-methyl-3-(1-methylethyl)-	6-甲基-3-（1-甲基乙基）-7-氧杂双环[4.1.0]庚-2-酮	Ketone	酮	-	-	5286-38-4	222257	169524	171044	441044	434704	473515	1.13301	0.000462526	0.0109819	2.3973	1.26141	up
D344	GC-MS	C11H18O	(E,E)-2,4-Undecadienal	（E，E）-2,4-十一烯醛	Aldehyde	醛	-	-	30361-29-6	2.29973e+06	1.07442e+06	3.31837e+06	1.20853e+07	8.9614e+06	9.25414e+06	1.06153	0.0045327	0.0327109	4.52757	2.17874	up
XMW0424	GC-MS	C11H18O	2,6-Dimethyl-1-nonen-3-yn-5-ol	2,6-二甲基-1-壬烯基-5-醇	Alcohol	醇	-	-	19780-98-4	54608.2	44758.9	46873.7	551495	737345	656297	1.15193	0.00780462	0.0388329	13.3009	3.73345	up
NMW0151	GC-MS	C10H14O2	Bicyclo[3.1.1]hept-2-ene-2-carboxylic acid, 6,6-dimethyl-	6,6-二甲基-双环[3.1.1]庚-2-烯-2-羧酸	Terpenoids	萜类	-	-	19250-17-0	47096.3	36210.3	77907.2	1.26781e+06	793121	991872	1.13838	0.0190992	0.0514682	18.9364	4.24309	up
D113	GC-MS	C10H14O2	Benzene, (2,2-dimethoxyethyl)-	（2,2-二甲氧基乙基）-苯	Aromatics	芳烃	-	-	101-48-4	9	9	9	30440.6	21298.3	35317.5	1.15537	0.0194776	0.0520885	3224.31	11.6548	up
KMW0365	GC-MS	C10H14O2	2-((3,3-Dimethyloxiran-2-yl)methyl)-3-methylfuran	（环氧甲基丁基）-甲基呋喃	Heterocyclic compound	杂环化合物	-	-	92356-06-4	9	9	9	132807	128450	207845	1.15537	0.0261038	0.0600319	17374.1	14.0847	up
XMW0472	GC-MS	C9H10O3	1,2-Ethanediol, monobenzoate	1,2-乙二醇单苯甲酸酯	Ester	酯	-	-	94-33-7	456554	332279	337833	4.73689e+07	2.63082e+07	3.12236e+07	1.1523	0.0321898	0.0673304	93.1071	6.54082	up
D359	GC-MS	C10H16N2	Pyrazine, 2,3-dimethyl-5-(1-methylpropyl)-	2,3-二甲基-5-（1-甲基丙基）-吡嗪	Heterocyclic compound	杂环化合物	-	-	32263-00-6	15352.5	10357.6	34594.1	217157	217549	299388	1.11087	0.0103453	0.0410063	12.1732	3.60563	up
D343	GC-MS	C10H12O2	3-Methoxyphenyl acetone	3-甲氧苯基丙酮	Ketone	酮	-	-	3027-13-2	32481.6	12716.6	49803.6	137253	108768	109344	1.00703	0.0038837	0.030402	3.7406	1.90327	up
XMW1140	GC-MS	C10H12O2	2-methyl-5-propan-2-ylcyclohexa-2,5-diene-1,4-dione	2-甲基-5-丙-2-基环己-2,5-二烯-1,4-二酮	Ketone	酮	-	-	490-91-5	803938	1.46202e+06	8.53043e+06	6018.99	7181.78	4370.18	1.12514	0.283443	0.330683	0.00162748	-9.26314	down
KMW0601	GC-MS	C10H12O2	2-Butanone, 4-(4-hydroxyphenyl)-	覆盆子酮	Ketone	酮	-	-	5471-51-2	81818.2	44040.5	122748	1.49746e+06	942352	1.21018e+06	1.12498	0.0178007	0.0494896	14.6818	3.87596	up
XMW1406	GC-MS	C10H12O2	2'-Ethoxyacetophenone	2'-乙氧基苯乙酮	Ketone	酮	-	-	2142-67-8	151990	76668.9	92733.7	41871.1	45098.6	52373.6	1.01501	0.11527	0.162023	0.433561	-1.20569	down
NMW0264	GC-MS	C9H8O3	2-Propenoic Acid, 3-(3-hydroxyphenyl)-	3-（3-羟苯基）-2-丙酸	Acid	酸	-	-	588-30-7	4629.74	5677.18	6365.32	535635	980861	1.38636e+06	1.14749	0.0594523	0.0970796	174.113	7.44388	up
XMW0794	GC-MS	C12H18	1,5-Cyclooctadiene, 3-(1-methyl-2-propenyl)-	3-（1-甲基-2-丙烯基）-1,5-环辛二烯	Hydrocarbons	烃类	-	-	16538-88-8	205425	68018.3	193064	9	9	9	1.15259	0.0712533	0.112482	5.78769e-05	-14.0767	down
XMW0793	GC-MS	C12H18	1,7-Octadiene, 2,7-dimethyl-3,6-bis(methylene)-	2,7-二甲基-3,6-双（亚甲基）-1,7-辛二烯	Hydrocarbons	烃类	-	-	16714-60-6	89592.1	10479.6	51289.3	819287	812784	993656	1.07197	0.00201672	0.0230089	17.3475	4.11665	up
XMW0470	GC-MS	C10H14N2	1-ButanAmine, N-(2-pyridinylmethylene)-	N-（2-吡啶基亚甲基）-1-丁胺	Amine	胺	-	-	7032-24-8	516998	391917	352805	5.74121e+07	3.16494e+07	3.76827e+07	1.15219	0.0328903	0.0681123	100.454	6.65038	up
D102	GC-MS	C11H14O	1-Pentanone, 1-phenyl-	1-苯基-1-戊酮	Ketone	酮	-	-	1009-14-9	81874.4	115193	138631	2.30218e+06	1.46553e+06	1.67059e+06	1.14349	0.0208395	0.0534397	16.2	4.01792	up
XMW0805	GC-MS	C10H10S	Benzo[b]thiophene, 2-ethyl-	2-乙基-苯并[b]噻吩	Heterocyclic compound	杂环化合物	-	-	1196-81-2	117900	83422.1	94119.9	1.05752e+07	5.19257e+06	6.81034e+06	1.15048	0.043121	0.0791737	76.4215	6.25591	up
XMW1303	GC-MS	C8H16O3	Pentanoic acid, 2-hydroxy-4-methyl-, ethyl ester	2-羟基-4-甲基戊酸乙酯	Ester	酯	-	-	10348-47-7	13152.5	28187.2	33577.7	5.79636e+06	4.59204e+06	6.13929e+06	1.14825	0.00723112	0.0379841	220.612	7.78537	up
XMW0718	GC-MS	C7H12O4	Butanedioic acid, methyl-, dimethyl ester	甲基丁二酸二甲酯	Ester	酯	-	-	1604-11-1	782.522	2327.05	2968.72	703378	577993	739937	1.14367	0.0052804	0.0355466	332.545	8.37741	up
KMW0416	GC-MS	C6H8OS2	Furan, 2-[(methyldithio)methyl]-	糠基甲基二含硫化合物	Sulfur compounds	含硫化合物	-	-	57500-00-2	9	9	9	2.84266e+06	2.10608e+06	3.42876e+06	1.15575	0.0182635	0.0503752	310278	18.2432	up
NMW0086	GC-MS	C11H13N	Pargyline	矮牵牛	Amine	胺	-	-	555-57-7	9	9	9	3.50426e+06	3.38047e+06	6.1007e+06	1.15546	0.0395065	0.0752037	480942	18.8755	up
D270	GC-MS	C9H18O2	Propanoic acid, 2-methyl-, pentyl ester	丙酸2-甲基戊酯	Ester	酯	-	-	2445-72-9	3522.66	8607.92	9103.43	2.65978e+06	2.10231e+06	2.8568e+06	1.14859	0.0078622	0.0388329	358.806	8.48706	up
WMW0087	GC-MS	C9H18O2	Butanoic Acid, 3-methylbutyl ester	丁酸异戊酯	Acid	酸	-	-	106-27-4	9	9	9	15419.1	13435.9	16450.2	1.15586	0.00341699	0.0287256	1677.97	10.7125	up
D271	GC-MS	C9H18O2	Propanoic acid, hexyl ester	丙酸己酯	Ester	酯	-	-	2445-76-3	1.86024e+06	2.55459e+06	2.01551e+07	290555	239077	423440	1.00844	0.319008	0.364432	0.0387901	-4.68817	down
D269	GC-MS	C9H18O2	Butanoic acid, 2-methyl-, 2-methylpropyl ester	丁酸2-甲基-2-甲基丙酯	Ester	酯	-	-	2445-67-2	41005.4	15889.3	16461.1	181544	111441	169687	1.09162	0.0167936	0.0491772	6.30725	2.65701	up
XMW1211	GC-MS	C9H18O2	2-Heptanol, acetate	1-甲基己基乙酸酯	Ester	酯	-	-	5921-82-4	3414.9	2587.63	4092.79	59239.9	61355.3	54757.2	1.15026	0.000771688	0.0152343	17.3697	4.1185	up
XMW0449	GC-MS	C8H14O3	Butanoic acid, anhydride	丁酸酸酐	Others	其它类	-	-	106-31-0	9	9	9	44162.1	34195.9	45222.4	1.15581	0.00719407	0.0379579	4577.05	12.1602	up
D255	GC-MS	C10H10N2	Quinoxaline, 2,3-dimethyl-	2,3-二甲基喹喔啉	Heterocyclic compound	杂环化合物	-	-	2379-55-7	1.11009e+07	4.79233e+06	1.59935e+07	9	9	9	1.15444	0.0817892	0.125068	8.46746e-07	-20.1716	down
XMW0281	GC-MS	C11H24	Decane, 5-methyl-	5-甲基-癸烷	Hydrocarbons	烃类	-	-	13151-35-4	6047.04	7250.34	11457.4	1.05232e+06	835456	1.09198e+06	1.15123	0.00646944	0.0374105	120.371	6.91134	up
XMW0403	GC-MS	C11H24	Nonane, 2,5-dimethyl-	2,5-二甲基壬烷	Hydrocarbons	烃类	-	-	17302-27-1	1.04586e+06	722725	903882	36513.4	35611.9	38132.2	1.15278	0.011772	0.0415328	0.0412569	-4.59922	down
KMW0392	GC-MS	C10H20O	Cyclohexanol, 5-methyl-2-(1-methylethyl)-, (1.alpha.,2.alpha.,5.alpha.)-	新异薄荷醇	Terpenoids	萜类	-	-	491-02-1	318207	286601	320584	157317	118088	112925	1.11973	0.000726708	0.0150215	0.419638	-1.25278	down
KMW0250	GC-MS	C10H20O	7-Octen-2-ol, 2,6-dimethyl-	6（10）-二氢月桂烯醇	Terpenoids	萜类	-	-	18479-58-8	913.591	2431.05	2968.25	706506	574160	745676	1.14583	0.00588097	0.036405	320.985	8.32636	up
D202	GC-MS	C9H16O2	3-Hexen-1-ol, propanoate, (Z)-	（Z）-3-己基丙酸酯	Ester	酯	-	-	33467-74-2	191495	1.07473e+06	610153	31206.4	27981.7	37979.5	1.08421	0.145618	0.193386	0.0517848	-4.27133	down
XMW1342	GC-MS	C12H12	Naphthalene, 1,4-dimethyl-	1,4-二甲基-萘	Aromatics	芳烃	-	-	571-58-4	285387	119001	380482	9	9	9	1.15324	0.0757457	0.118193	3.44006e-05	-14.8272	down
NMW0098	GC-MS	C8H13NO2	Arecoline	槟榔碱	Heterocyclic compound	杂环化合物	-	-	63-75-2	11308.5	9967.86	20147.7	932.229	1565.05	1218.14	1.13099	0.0584514	0.0959805	0.089692	-3.47888	down
XMW1472	GC-MS	C11H22	Cyclohexane, 1-ethyl-2-propyl-	1-乙基-2-丙基-环己烷	Hydrocarbons	烃类	-	-	62238-33-9	19824.3	13577.9	29922.4	79339.4	133928	100864	1.09301	0.0261933	0.0600597	4.96065	2.31053	up
KMW0342	GC-MS	C10H18O	Citronellal	香茅醛	Terpenoids	萜类	-	-	106-23-0	9	9	9	1.08505e+06	829322	1.33097e+06	1.15573	0.0174548	0.0494017	120198	16.8751	up
D409	GC-MS	C10H18O	(S)-2,5-Dimethyl-3-vinylhex-4-en-2-ol	（S）-2,5-二甲基-3-乙烯基己基-4-烯-2-醇	Alcohol	醇	-	-	35671-15-9	315756	340396	802177	2.09045e+07	2.16481e+07	2.00892e+07	1.14088	0.000125198	0.00559682	42.9544	5.42474	up
D306	GC-MS	C10H18O	1,5-Heptadien-4-ol, 3,3,6-trimethyl-	3,3,6-三甲基-1,5-庚二烯-4-醇	Terpenoids	萜类	-	-	27644-04-8	13052.6	11601.8	31202.4	98051.7	102075	125918	1.09046	0.00164077	0.0211973	5.83716	2.54527	up
XMW1072	GC-MS	C10H18O	(E)-2,6-Dimethylocta-5,7-dien-2-ol	（E）-2,6-二甲基辛基-5,7-二烯-2-醇	Alcohol	醇	-	-	7643-60-9	9	9	9	181558	88981.1	280635	1.1537	0.0799904	0.123068	20413.8	14.3173	up
XMW0217	GC-MS	C10H18O	cis-7-Decen-1-al	Cis-7-癸烯醛	Aldehyde	醛	-	-	21661-97-2	9	9	9	919054	844988	1.3479e+06	1.15562	0.0220837	0.0546646	115257	16.8145	up
D192	GC-MS	C10H18O	Fenchol	芬醇	Terpenoids	萜类	-	-	1632-73-1	436777	366610	578736	1.27551e+06	995932	1.87775e+06	1.06625	0.064037	0.103508	3.00204	1.58594	up
KMW0588	GC-MS	C10H18O	3-Cyclohexene-1-ethanol, .beta.,4-dimethyl-	2-（4-甲基环己-3-烯-1-基）丙-1-醇	Alcohol	醇	-	-	18479-68-0	81295.5	35684.2	125210	1.36303e+06	1.68739e+06	1.60171e+06	1.12232	0.00263913	0.0257471	19.2086	4.26368	up
NMW0104	GC-MS	C10H18O	2,6-Octadien-1-ol, 3,7-dimethyl-	3,7-二甲基-2,6-辛二烯-1-醇	Alcohol	醇	-	-	624-15-7	193884	166731	178220	515951	510857	557797	1.15124	0.000226454	0.00741231	2.9408	1.55621	up
XMW1227	GC-MS	C9H14O2	(E)-2-Methylbut-2-en-1-yl methacrylate	（E）-2-甲基丙烯酸-2-甲基丁-2-烯-1-基酯	Ester	酯	-	-	88142-95-4	22729.9	14450	30528.8	2.22152e+06	2.30884e+06	3.03299e+06	1.14989	0.0104103	0.0410063	111.704	6.80354	up
XMW1440	GC-MS	C8H10O3	2-methylprop-2-enoyl 2-methylprop-2-enoate	2-甲基丙-2-烯丙基2-甲基丙-2-烯酸酯	Ester	酯	-	-	760-93-0	4608.73	15656.1	13551.7	1.20127e+06	884236	1.27207e+06	1.13853	0.0113368	0.0413481	99.2882	6.63355	up
XMW0663	GC-MS	C9H16N2	3,5-Dimethyl-1-butylpyrazole	3,5-二甲基-1-丁基吡唑	Heterocyclic compound	杂环化合物	-	-	2655-37-0	259248	145664	448430	9	9	9	1.1538	0.084363	0.127909	3.16403e-05	-14.9479	down
KMW0324	GC-MS	C10H16O	Limonene oxide, cis-	（Z）-柠檬烯氧化物	Terpenoids	萜类	-	-	13837-75-7	10501.3	4597.43	14523.5	112700	178698	186531	1.11637	0.0223109	0.0551021	16.1341	4.01204	up
XMW0526	GC-MS	C10H16O	AcetAldehyde, (3,3-dimethylcyclohexylidene)-, (Z)-	（Z）-（3,3-二甲基环己叉基）-乙醛	Aldehyde	醛	-	-	26532-24-1	9	9	9	1.34471e+06	963680	1.61801e+06	1.1557	0.020377	0.0531194	145422	17.1499	up
NMW0046	GC-MS	C10H16O	Bicyclo[3.1.1]heptan-3-ol, 6,6-dimethyl-2-methylene-, [1S-(1.alpha.,3.alpha.,5.alpha.)]-	[1S-（1α，3α，5α）]-6,6-二甲基-2-亚甲基-双环[3.1.1]庚-3-醇	Terpenoids	萜类	-	-	547-61-5	61580	20679.8	59693.1	685310	773759	898356	1.12103	0.00520008	0.0352762	16.6071	4.05373	up
WMW0221	GC-MS	C10H16O	Bicyclo[3.1.0]hexan-3-one, 4-methyl-1-(1-methylethyl)-	4-甲基-1-（1-甲基乙基）-双环[3.1.0]己-3-酮	Terpenoids	萜类	-	-	1125-12-8	61258.3	31541.3	48986.5	375278	309550	391868	1.13431	0.00318795	0.0281505	7.59381	2.92482	up
XMW0189	GC-MS	C10H16O	3-Cyclohexene-1-acetAldehyde, .alpha.,4-dimethyl-	α，4-二甲基-3-环己烯-1-乙醛	Aldehyde	醛	-	-	29548-14-9	9	9	9	740135	540032	881139	1.1557	0.018351	0.0505372	80048.4	16.2886	up
KMW0329	GC-MS	C10H16O	Camphor	樟脑	Terpenoids	萜类	-	-	76-22-2	14275.2	13459.2	3035.77	56181.2	80434.2	62292.1	1.03524	0.00674538	0.0374105	6.4643	2.69249	up
KMW0254	GC-MS	C10H16O	1,5-Heptadien-4-one, 3,3,6-trimethyl-	蒿酮	Terpenoids	萜类	-	-	546-49-6	33560.4	39679.1	71739.9	351797	285293	377104	1.1212	0.00343514	0.0287407	6.99543	2.80641	up
XMW0654	GC-MS	C10H16O	Ethanone, 1-(1,4-dimethyl-3-cyclohexen-1-yl)-	1-（1,4-二甲基-3-环己烯-1-基）-乙酮	Terpenoids	萜类	-	-	43219-68-7	2894.9	2774.41	9	585089	634244	709104	1.02785	0.0031328	0.0279676	339.614	8.40775	up
KMW0310	GC-MS	C10H16O	2-Cyclohexen-1-ol, 1-methyl-4-(1-methylethenyl)-, trans-	（1R，4R）-1-甲基-4-丙-1-烯-2-基环己基-2-烯-1-醇	Alcohol	醇	-	-	7212-40-0	5874.77	1897.63	8719.78	35787.2	33858.7	45086.9	1.05739	0.00305132	0.0277781	6.9568	2.79842	up
D193	GC-MS	C10H16O	p-Mentha-1,8-dien-7-ol	对-孟沙-1,8-二烯-7-醇	Terpenoids	萜类	-	-	536-59-4	9	9	9	811523	1.01068e+06	953560	1.15571	0.0040699	0.0312097	102806	16.6496	up
WMW0159	GC-MS	C10H16O	(+)-(1R,4R,5R)-2-(10)-PINEN-4-OL	（+）-顺式-邻苯二酚	Terpenoids	萜类	-	-	13040-03-4	42685.9	22461.1	67106.5	321080	490573	489123	1.10737	0.0163191	0.0483519	9.83548	3.298	up
XMW0766	GC-MS	C10H16O	Cyclohexanone, 5-methyl-2-(1-methylethylidene)-	5-甲基-2-（1-甲基亚乙基）-环己酮	Terpenoids	萜类	-	-	15932-80-6	9	9	9	1.0634e+06	1.09134e+06	1.92992e+06	1.15531	0.0409409	0.0770161	151283	17.2069	up
XMW0720	GC-MS	C10H16O	cis-p-Mentha-2,8-dien-1-ol	顺式-p-薄荷（2,8-二烯-1-醇）	Terpenoids	萜类	-	-	3886-78-0	165734	36165.2	164060	8.08511e+06	7.10265e+06	9.88897e+06	1.12624	0.00951848	0.0409664	68.5234	6.09852	up
QWM0003	GC-MS	C10H16O	2H-Pyran, 3,6-dihydro-4-methyl-2-(2-methyl-1-propenyl)-	3,6-二氢-4-甲基-2-（2-甲基-1-丙烯基）-2H-吡喃	Terpenoids	萜类	-	-	1786-08-9	13379.5	5576.11	54909.8	421224	479969	511211	1.07282	0.000477982	0.0111975	19.1213	4.25711	up
XMW1133	GC-MS	C10H16O	5-Isopropyl-3,3-dimethyl-2-methylene-2,3-dihydrofuran	5-异丙基-3,3-二甲基-2-亚甲基-2,3-二氢呋喃	Heterocyclic compound	杂环化合物	-	-	81250-44-4	19159	19454.2	48236.7	1.82712e+06	999709	1.66905e+06	1.13763	0.0283579	0.0621074	51.766	5.69393	up
D329	GC-MS	C10H16O	Myroxide	肉豆蔻	Terpenoids	萜类	-	-	28977-57-3	19338.6	15340.3	82602.8	3.19726e+06	2.55805e+06	3.74143e+06	1.12531	0.0115029	0.0415108	80.9738	6.33938	up
XMW1386	GC-MS	C9H12O2	2-Acetyl-4,4-dimethyl-cyclopent-2-enone	2-乙酰基-4,4-二甲基-环戊-2-烯酮	Ketone	酮	-	-	81979-96-6	342944	310678	383365	1.552e+06	1.40787e+06	2.09988e+06	1.13959	0.0229164	0.0560781	4.87928	2.28667	up
NMW0236	GC-MS	C8H8O3	Benzeneacetic Acid, 4-hydroxy-	4-羟基-苯乙酸	Acid	酸	-	-	156-38-7	80833.1	43246.3	122727	1.48159e+06	941148	1.19759e+06	1.12435	0.0170433	0.049306	14.6687	3.87467	up
NMW0197	GC-MS	C8H8O3	Benzoic Acid, 4-methoxy-	4-甲氧基苯甲酸	Aromatics	芳烃	-	-	100-09-4	258347	207732	438810	2.00479e+07	3.35878e+07	4.62768e+07	1.1437	0.0488191	0.0845076	110.414	6.78678	up
D384	GC-MS	C4H8S3	TriSulfur compounds, methyl 2-propenyl	烯丙基三硫	Sulfur compounds	含硫化合物	-	-	34135-85-8	9	9	1477.66	28010.3	23702	32695.8	1.01492	0.0070994	0.0379579	56.4353	5.81853	up
XMW1316	GC-MS	C8H9NO2	4-Methoxyformanilide	4-甲氧基甲酰苯胺	Amine	胺	-	-	5470-34-8	9	9	9	11441.7	15060	35816.6	1.15117	0.111778	0.158255	2308.08	11.1725	up
XMW0738	GC-MS	C8H9NO2	Benzoic acid, 4-amino-, methyl ester	苯甲酸4-氨基甲酯	Ester	酯	-	-	619-45-4	27737.3	33956.6	50963.2	681109	433233	498784	1.13983	0.0205214	0.0532585	14.3189	3.83985	up
XMW0088	GC-MS	C6H5N3O2	Pyrolo[3,2-d]pyrimidin-2,4(1H,3H)-dione	吡咯并[3,2-d]嘧啶-2,4（1H，3H）-二酮	Ketone	酮	-	-	65996-50-1	10465.7	8917.1	12454.2	83987.2	61100.4	74868.2	1.14547	0.00974928	0.0409664	6.90881	2.78844	up
XMW0690	GC-MS	C11H18	Cyclohexene, 2,4-dimethyl-1-(1-methylethenyl)-	2,4-二甲基-1-（1-甲基乙烯基）-环己烯	Hydrocarbons	烃类	-	-	56763-60-1	279701	166367	279474	1.10346e+06	1.06528e+06	1.53237e+06	1.12107	0.01723	0.0494017	5.10117	2.35083	up
XMW0925	GC-MS	C10H14O	Camphenone, 6-	6-甲苯酮	Ketone	酮	-	-	55659-42-2	280910	167085	278839	1.09975e+06	1.05538e+06	1.52489e+06	1.12096	0.0175172	0.0494017	5.06308	2.34002	up
NMW0120	GC-MS	C10H14O	Phenol, p-tert-butyl-	对叔丁基苯酚	Phenol	酚	-	-	98-54-4	40001.6	16885.1	59757.1	624338	767958	715813	1.12044	0.00214679	0.0233844	18.0731	4.17577	up
XMW0968	GC-MS	C10H14O	4,7,7-Trimethylbicyclo[4.1.0]hept-3-en-2-one	4,7,7-三甲基双环[4.1.0] 庚-3-烯-2-酮	Ketone	酮	-	-	81800-50-2	9	9	9	122394	74368.9	67202.8	1.15519	0.0366657	0.0718992	9776.53	13.2551	up
XMW0721	GC-MS	C10H14O	Benzene, 1-methoxy-4-propyl-	1-甲氧基-4-丙基-苯	Aromatics	芳烃	-	-	104-45-0	9	678.579	9	51470.3	40245.8	64440.2	1.07243	0.0176335	0.0494017	224.176	7.80849	up
KMW0473	GC-MS	C10H14O	4-Isopropylcyclohexa-1,3-dienecarbAldehyde	1,3-p-薄荷脑-7-醛	Aldehyde	醛	-	-	1197-15-5	26981.8	19878	47733.1	635782	762839	754638	1.13934	0.00260884	0.0257471	22.7634	4.50865	up
NMW0006	GC-MS	C10H14O	2-Cyclohexen-1-one, 3-methyl-6-(1-methylethylidene)-	3-甲基-6-（1-甲基亚乙基）-2-环己烯-1-酮	Terpenoids	萜类	-	-	491-09-8	22367.4	10791	40227.1	489680	321367	525221	1.11542	0.0200078	0.0524681	18.2089	4.18657	up
NMW0043	GC-MS	C10H14O	Bicyclo[3.1.1]hept-2-en-6-one, 2,7,7-trimethyl-	2,7,7-三甲基-双环[3.1.1]庚酮	Terpenoids	萜类	-	-	473-06-3	4655.14	4230.63	8647.09	111035	18030.8	97774	1.02257	0.137929	0.18556	12.938	3.69354	up
XMW0615	GC-MS	C10H14O	Phenol, m-tert-butyl-	间叔丁基-苯酚	Phenol	酚	-	-	585-34-2	40001.6	16885.1	59757.1	629416	777482	717075	1.12057	0.00228754	0.0243589	18.2091	4.18658	up
XMW0909	GC-MS	C10H14O	2,6,6-Trimethylbicyclo[3.2.0]hept-2-en-7-one	2,6,6-三甲基双环[3.2.0]庚-2-烯-7-酮	Terpenoids	萜类	-	-	4613-37-0	110524	75885.6	96138.5	487821	439607	700371	1.13343	0.0288465	0.0627567	5.76113	2.52635	up
KMW0418	GC-MS	C10H14O	(1R)-(-)-Myrtenal	S-肉豆蔻醛	Aldehyde	醛	-	-	18486-69-6	72128.5	32138.6	74267	833108	912641	904909	1.13349	7.72957e-05	0.00466038	14.8468	3.89208	up
NMW0052	GC-MS	C10H14O	2-Methyl-6-methyleneocta-2,7-dien-4-one	2-甲基-6-亚甲基辛基-2,7-二烯酮	Terpenoids	萜类	-	-	539-70-8	37582.7	30778.4	25947.6	61703.4	67573.8	80951.2	1.09939	0.00799027	0.0388329	2.22915	1.1565	up
NMW0153	GC-MS	C10H14O	Phenol, 4-butyl-	4-丁基-苯酚	Phenol	酚	-	-	1638-22-8	58776.7	46956.7	106283	2.02808e+06	1.24797e+06	1.61147e+06	1.1382	0.0197262	0.0522049	23.0526	4.52686	up
NMW0128	GC-MS	C10H14O	Phenol, 4-(1-methylpropyl)-	4-（1-甲基）苯酚	Phenol	酚	-	-	99-71-8	9	9	9	41193	21684.1	23614.8	1.15483	0.0433738	0.0795489	3203.41	11.6454	up
XMW1088	GC-MS	C9H10O2	4-Hydroxy-2-methylacetophenone	4-羟基-2-甲基苯乙酮	Ketone	酮	-	-	875-59-2	9	9	9	300046	201004	239435	1.1558	0.0133696	0.044155	27425.4	14.7432	up
XMW0535	GC-MS	C9H10O2	p-Tolylacetic Acid	对甲苯甲酸	Aromatics	芳烃	-	-	622-47-9	39872.4	28206.7	60282.1	1.14529e+06	731636	925356	1.14092	0.0170199	0.049306	21.8312	4.44832	up
NMW0039	GC-MS	C6H14S2	DiSulfur compounds, dipropyl	二硫化二丙基	Sulfur compounds	含硫化合物	-	-	629-19-6	2416.15	2388.24	3971.63	2.76486e+06	2.28788e+06	3.9694e+06	1.15317	0.0266292	0.0602262	1028.04	10.0057	up
XMW0545	GC-MS	C10H15N	Benzenemethanamine, N-(1-methylethyl)-	N-（1-甲基乙基）-苯甲胺	Aromatics	芳烃	-	-	102-97-6	9	9	9	3.05622e+06	2.27475e+06	3.64085e+06	1.15577	0.017062	0.049306	332290	18.3421	up
D355	GC-MS	C10H15N	2,6-Octadienenitrile, 3,7-dimethyl-, (Z)-	（2Z）-3,7-二甲基辛基-2,6-二烯腈	Nitrogen compounds	含氮化合物	-	-	31983-27-4	150805	125663	253040	8981.43	9278.39	12432.2	1.14103	0.0506318	0.0860348	0.0579632	-4.10872	down
NMW0156	GC-MS	C8H7NS	Benzene, (isothiocyanatomethyl)-	苯异硫氰酸酯	Heterocyclic compound	杂环化合物	-	-	622-78-6	41300.1	40345.2	88910.6	1.38825e+06	860288	1.06186e+06	1.13414	0.0199955	0.0524681	19.4095	4.27869	up
NMW0135	GC-MS	C8H7NS	Thiocyanic acid, phenylmethyl ester	苯甲基酯硫氰酸	Sulfur compounds	含硫化合物	-	-	3012-37-1	47523.3	15449.2	28206.3	152394	116659	192176	1.06953	0.0177434	0.0494896	5.05852	2.33872	up
XMW0731	GC-MS	C11H16	Benzene, pentamethyl-	五甲基-苯	Aromatics	芳烃	-	-	700-12-9	178514	91208.4	407251	29164.6	34120.7	38074.1	1.03164	0.178573	0.228655	0.149724	-2.73962	down
XMW0941	GC-MS	C11H16	exo-7-(trans-1-Propenyl)bicyclo[4.2.0]oct-1(2)-ene	7-[（1E）-1-丙烯基]双环[4.2.0]辛-1-烯	Hydrocarbons	烃类	-	-	107983-42-6	100362	41620.2	117318	2.77382e+06	2.88251e+06	3.60513e+06	1.13722	0.0071251	0.0379579	35.7172	5.15855	up
XMW0931	GC-MS	C10H12O	8,9-Dehydrothymol	8,9-脱氢百里酚	Phenol	酚	-	-	18612-99-2	4511.6	2508.31	8476.2	376998	335948	550266	1.13924	0.0239722	0.0570719	81.5181	6.34905	up
D290	GC-MS	C10H12O	2-Butanone, 4-phenyl-	4-苯基-2-丁酮	Ketone	酮	-	-	2550-26-7	1345.55	954.811	1144.03	6204.12	8173.24	9555.38	1.14021	0.0185712	0.0507747	6.94832	2.79667	up
XMW0550	GC-MS	C7H8N4	N-Cyanomethyl-2-cyanimino-pyrrolidine	N-氰基甲基-2-氰基亚氨基吡咯烷	Heterocyclic compound	杂环化合物	-	-	134881-46-2	1975.02	502.701	287.448	145503	101481	116543	1.13034	0.0112401	0.0413481	131.467	7.03855	up
KMW0213	GC-MS	C6H12O2S	3-Mercapto-3-methylbutyl formate (ester)	巯基甲基丁酸酯	Sulfur compounds	含硫化合物	-	-	50746-10-6	13072.7	9618.28	26887	73783.9	74940	64316.3	1.07192	0.00194117	0.0225936	4.29708	2.10336	up
XMW1383	GC-MS	C5H9Br	bromo-Cyclopentane	溴-环戊烷	Halogenated hydrocarbons	卤代烃	-	-	137-43-9	96404.1	102905	190381	1.21109e+06	426017	3.42635e+06	1.00972	0.224901	0.275751	12.9935	3.69972	up
XMW0811	GC-MS	C9H9NO	Phenethyl isocyanate	异氰酸苯乙酯	Ester	酯	-	-	1943-82-4	9	9	9	3.05148e+06	2.26621e+06	3.6385e+06	1.15577	0.0172726	0.0494017	331711	18.3396	up
XMW1220	GC-MS	C6H10O4	Ethyl hydrogen succinate	琥珀酸氢乙酯	Ester	酯	-	-	1070-34-4	9	9	9	20805.4	17604.9	25316.9	1.15562	0.0109175	0.0411633	2360.27	11.2047	up
KMW0560	GC-MS	C9H6O2	Coumarin	香豆素	Heterocyclic compound	杂环化合物	-	-	91-64-5	123545	76794.4	218362	2.25605e+06	3.63956e+06	4.96325e+06	1.12512	0.046555	0.0817971	25.9347	4.69681	up
GMW0113	GC-MS	C6H10S2	Diallyl disulphide	二烯丙基二硫化物	Sulfur compounds	含硫化合物	-	-	2179-57-9	70911.2	52943.1	63429.4	165682	299853	257625	1.10636	0.0437098	0.0798023	3.86131	1.94909	up
NMW0355	GC-MS	C9H7NO	1H-Indole-3-carboxaldehyde	1H-吲哚-3-甲醛	Heterocyclic compound	杂环化合物	-	-	487-89-8	382561	377182	419592	44233.8	33186.9	37175.1	1.15201	0.000817499	0.0154229	0.0971699	-3.36335	down
D387	GC-MS	C9H20O	1-Hexanol, 3,5,5-trimethyl-	3,5,5-三甲基-1-己醇	Alcohol	醇	-	-	3452-97-9	3047.78	4495.52	5674.1	229812	177700	248824	1.14904	0.00962232	0.0409664	49.6569	5.63392	up
WMW0109	GC-MS	C8H16O2	Propanoic acid, 2-methyl-, 2-methylpropyl ester	异丁酸异丁酯	Ester	酯	-	-	97-85-8	936192	828654	1.19493e+06	47681.2	28822.3	41451.5	1.14787	0.0127407	0.0433699	0.0398527	-4.64918	down
KMW0204	GC-MS	C8H16O2	Acetic acid, hexyl ester	乙酸己酯	Ester	酯	-	-	142-92-7	823208	562215	708445	48488.4	51295.9	55784.9	1.15078	0.0133364	0.0441282	0.0742975	-3.75054	down
D137	GC-MS	C9H21N	N,N-dipropyl-1-PropanAmine	N，N-二丙基-1-丙胺	Amine	胺	-	-	102-69-2	45546.8	37510.7	42372.7	2480.73	3262.31	1705.2	1.14567	0.00265619	0.0257471	0.0593815	-4.07384	down
KMW0208	GC-MS	C10H22	Decane	癸烷	Hydrocarbons	烃类	-	-	124-18-5	40780.8	15861.7	16211.8	179155	109184	167261	1.09046	0.0174239	0.0494017	6.25357	2.64468	up
XMW1299	GC-MS	C10H22	Heptane, 3,3,5-trimethyl-	3,3,5-三甲基-庚烷	Hydrocarbons	烃类	-	-	7154-80-5	937475	828293	1.19545e+06	38788.4	27485.6	37084.7	1.15085	0.0127375	0.0433699	0.0349041	-4.84046	down
XMW0226	GC-MS	C9H18O	2-Heptanone, 4,6-dimethyl-	4,6-二甲基-2-庚酮	Ketone	酮	-	-	19549-80-5	1748.45	6356.82	9116.14	487658	358435	513857	1.12615	0.0112035	0.0413481	78.9686	6.30321	up
WMW0100	GC-MS	C9H18O	3-Nonen-1-ol, (E)-	（E）-3-壬-1-醇	Alcohol	醇	-	-	10339-61-4	26693.7	22710.3	47882.8	459591	420814	563676	1.13751	0.0073477	0.0383083	14.8436	3.89176	up
QWM0006	GC-MS	C9H18O	2-Nonanone	2-壬基酮	Ketone	酮	-	-	821-55-6	1385.61	703.525	1602.75	21315.4	18730.4	23934.6	1.13758	0.00446185	0.0326642	17.33	4.1152	up
w15	GC-MS	C9H18O	2-Nonen-1-ol	2-壬烯-1-醇	Alcohol	醇	-	-	22104-79-6	235717	1.09545e+06	661383	39018.7	32154.7	41022.7	1.09639	0.127472	0.175524	0.0563078	-4.15052	down
XMW1085	GC-MS	C8H14O2	2-Butenoic acid, butyl ester	2-丁酸-丁酯	Ester	酯	-	-	7299-91-4	5338.21	16627.7	13663.6	1.20211e+06	886197	1.27541e+06	1.14086	0.0113395	0.0413481	94.4079	6.56084	up
NMW0016	GC-MS	C8H14O2	Acetic acid, cyclohexyl ester	醋酸环己酯	Ester	酯	-	-	622-45-7	100594	90117.6	200302	4.4893e+06	4.63235e+06	4.32496e+06	1.14387	7.35209e-05	0.00466038	34.3891	5.10388	up
D229	GC-MS	C8H14O2	Allyl isovalerate	异戊酸烯丙酯	Ester	酯	-	-	2835-39-4	1.20344e+06	1.06357e+06	2.07583e+06	52933.2	35568.2	52177.1	1.14431	0.0474636	0.0829787	0.0323932	-4.94816	down
D309	GC-MS	C8H14O2	Ethyl 2-hexenoate, trans-	2-己酸乙酯	Ester	酯	-	-	27829-72-7	1780.9	4292.49	4296.09	311159	231937	331083	1.14415	0.0108329	0.0411633	84.3031	6.39751	up
XMW0434	GC-MS	C8H14O2	4-Hexen-1-ol, acetate	4-己烯-1-醇，乙酸	Others	其它类	-	-	72237-36-6	96807	52068.7	132497	760088	793269	744705	1.11982	7.02753e-05	0.00466038	8.16731	3.02986	up
XMW0362	GC-MS	C8H14O2	2H-Pyran-2-one, tetrahydro-4,6,6-trimethyl-	四氢-4,6,6-三甲基-2H-吡喃-2-酮	Ketone	酮	-	-	20628-36-8	9	9	9	24601.9	22898.2	29848	1.15574	0.00651959	0.0374105	2864.74	11.4842	up
XMW0574	GC-MS	C8H14O2	4-Penten-1-ol, propanoate	4-戊烯-1-醇丙酸酯	Ester	酯	-	-	30563-30-5	216370	218216	422884	116688	116588	124021	1.02	0.135282	0.183262	0.416687	-1.26296	down
NMW0031	GC-MS	C8H15NO	Hygrine	古豆碱	Heterocyclic compound	杂环化合物	-	-	496-49-1	12784.4	4998.65	11367.8	1.43986e+06	1.48608e+06	1.91541e+06	1.14802	0.00877856	0.0399155	166.079	7.37572	up
NMW0097	GC-MS	C8H15NO	8-Azabicyclo[3.2.1]octan-3-ol, 8-methyl-, exo-	8-甲基-8-氮杂双环[3.2.1]-3-辛烷醇	Alcohol	醇	-	-	135-97-7	1.46414e+06	1.14976e+06	2.54496e+06	54443.9	63134	63427.7	1.14476	0.0591434	0.0969356	0.0350863	-4.83295	down
NMW0091	GC-MS	C8H15NO	8-Azabicyclo[3.2.1]octan-3-ol, 8-methyl-, endo-	8-甲基-8-氮杂双环[3.2.1]辛烷-3-醇	Alcohol	醇	-	-	120-29-6	9	9	9	275079	275964	322340	1.15584	0.0028622	0.0271478	32347.5	14.9814	up
XMW0119	GC-MS	C9H16O	Cyclopentanone, 2-methyl-3-(1-methylethyl)-	2-甲基-3-（1-甲基乙基）-环戊酮	Ketone	酮	-	-	54549-81-4	1312.39	643.928	1327.81	266266	207153	292475	1.1511	0.0097059	0.0409664	233.211	7.86549	up
XMW0486	GC-MS	C9H16O	Cyclohexanone, 2,2,6-trimethyl-	2,2,6-三甲基-环己酮	Ketone	酮	-	-	2408-37-9	102811	81098.4	178281	4.44281e+06	4.60955e+06	4.26519e+06	1.14575	0.000200966	0.00732114	36.7694	5.20043	up
XMW0181	GC-MS	C9H16O	5-Hepten-2-one, 4,6-dimethyl-	4,6-二甲基-5-庚-2-酮	Ketone	酮	-	-	31162-48-8	2281.24	1202.01	3086.4	6735.95	16397.6	17514.2	1.04808	0.0765189	0.118977	6.1872	2.62929	up
WMW0056	GC-MS	C9H16O	4-Nonenal, (E)-	（E）-4-壬醛	Aldehyde	醛	-	-	2277-16-9	78538	230356	174079	22154.3	24318.1	25494.8	1.09064	0.090547	0.135282	0.149009	-2.74653	down
XMW0917	GC-MS	C9H16O	3-Nonen-5-one	3-壬烯-5-酮	Ketone	酮	-	-	82456-34-6	23495.3	13152.3	33905.8	136673	124669	151458	1.10474	0.000434754	0.0107227	5.85089	2.54866	up
KMW0531	GC-MS	C9H16O	3,6-Nonadien-1-ol, (E,Z)-	（E，Z）-3,6-壬二烯-1-醇	Alcohol	醇	-	-	56805-23-3	21094.5	14060.2	194296	951202	1.29557e+06	1.35177e+06	1.03839	0.00473959	0.0338227	15.6833	3.97116	up
XMW0168	GC-MS	C8H12S	3-Butylthiophene	3-丁基噻吩	Heterocyclic compound	杂环化合物	-	-	34722-01-5	5556.23	3764.93	9241.19	130504	139911	173653	1.13896	0.00770019	0.0388329	23.9231	4.58033	up
XMW1212	GC-MS	C7H8O3	2-Furancarboxylic acid, ethyl ester	2-呋喃甲酸乙酯	Ester	酯	-	-	614-99-3	9258.58	19953	14926.1	1.56049e+06	1.22306e+06	1.7303e+06	1.14922	0.00983843	0.0409664	102.268	6.67621	up
XMW0034	GC-MS	C8H14N2	2-Dimethylamino-4-methyl-pent-4-enenitrile	2-二甲基氨基-4-甲基-戊-4-烯腈	Others	其它类	-	-	94492-10-1	110588	79642.3	95424.9	3647.71	3232.26	2856.59	1.15264	0.00926859	0.0406523	0.034085	-4.87472	down
XMW0900	GC-MS	C9H14O	3-Cyclohexen-1-one, 3,5,5-trimethyl-	3,5,5-三甲基-3-环己烯-1-酮	Ketone	酮	-	-	471-01-2	61427.3	62303.2	117711	1.68097e+06	1.74182e+06	1.58835e+06	1.14354	0.000144519	0.00594476	20.7551	4.37539	up
XMW0008	GC-MS	C9H14O	Isophorone	异佛尔酮	Ketone	酮	-	-	78-59-1	19243.2	14042.2	27192.7	306321	296411	443372	1.14097	0.0196521	0.0522049	17.2973	4.11247	up
D364	GC-MS	C7H10N2O	2-Ethoxy-3-methylpyrazine	2-乙氧基-3-甲基吡嗪	Heterocyclic compound	杂环化合物	-	-	32737-14-7	41062.7	120869	116648	3.91051e+07	3.08984e+07	4.16803e+07	1.14693	0.00757383	0.0388329	400.904	8.64711	up
D296	GC-MS	C7H10N2O	2-Ethyl-3-methoxypyrazine	2-乙基-3-甲氧基吡嗪	Heterocyclic compound	杂环化合物	-	-	25680-58-4	1102.67	1284.32	2567.68	380946	308576	409935	1.1496	0.00674563	0.0374105	221.903	7.79378	up
NMW0163	GC-MS	C8H10O2	p-Hydroxyphenyl methyl carbinol	对羟基苯甲基甲醇	Alcohol	醇	-	-	2380-91-8	4321.75	2624.11	4498.37	22695.5	18219.7	29337.7	1.12422	0.023002	0.0561313	6.13871	2.61794	up
KMW0220	GC-MS	C10H16	3-Carene	δ-3-蒈烯	Terpenoids	萜类	-	-	13466-78-9	2.22853e+06	2.79272e+06	7.684e+06	2.27752e+08	1.46768e+08	2.13805e+08	1.13171	0.0161862	0.0483212	46.3056	5.53312	up
KMW0259	GC-MS	C10H16	.gamma.-Terpinene	γ-萜类品烯	Terpenoids	萜类	-	-	99-85-4	577832	1.58062e+06	1.63175e+06	4.24208e+08	3.5477e+08	4.53942e+08	1.14705	0.00509925	0.035057	325.292	8.34559	up
KMW0252	GC-MS	C10H16	1,3,7-Octatriene, 3,7-dimethyl-	α-柠檬烯	Terpenoids	萜类	-	-	502-99-8	350105	1.57174e+06	1.16008e+06	1.30323e+08	9.68351e+07	1.37416e+08	1.13438	0.0105649	0.0410674	118.294	6.88623	up
KMW0217	GC-MS	C10H16	D-Limonene	（+）-柠檬烯	Terpenoids	萜类	-	-	5989-27-5	1204.25	862.644	3119.18	853738	661181	939975	1.14629	0.0100278	0.0409664	473.363	8.8868	up
KMW0178	GC-MS	C10H16	Bicyclo[3.1.0]hexane, 4-methylene-1-(1-methylethyl)-	沙宾烯	Terpenoids	萜类	-	-	3387-41-5	9	9	9	22610.3	53584.4	23816.5	1.15253	0.0812751	0.124608	3704.12	11.8549	up
KMW0198	GC-MS	C10H16	.alpha.-Phellandrene 1	（+）-α-芹烯1	Terpenoids	萜类	-	-	99-83-2	2.22853e+06	2.79272e+06	7.7006e+06	2.27707e+08	1.46733e+08	2.13754e+08	1.13162	0.0161867	0.0483212	46.2349	5.53091	up
XMW0416	GC-MS	C10H16	1,3-Cyclohexadiene, 5-butyl-	5-丁基-1,3-环己二烯	Hydrocarbons	烃类	-	-	30168-57-1	524581	620269	2.07768e+06	6.49968e+07	6.64091e+07	6.24973e+07	1.1314	3.64344e-05	0.00464542	60.1711	5.911	up
KMW0223	GC-MS	C10H16	1,3-Cyclohexadiene, 1-methyl-4-(1-methylethyl)-	α-萜类品烯	Terpenoids	萜类	-	-	99-86-5	131586	163462	454348	1.86577e+07	1.03803e+07	1.70474e+07	1.13289	0.0268141	0.0604005	61.4966	5.94244	up
XMW0084	GC-MS	C10H16	2,4,6-Octatriene, 2,6-dimethyl-	2,6-二甲基-2,4,6-辛三烯	Terpenoids	萜类	-	-	673-84-7	37949.4	21288.2	67573.2	270921	429540	408535	1.09804	0.0168283	0.0491827	8.74527	3.1285	up
XMW0521	GC-MS	C10H16	1,7-Octadiene, 2-methyl-6-methylene-	2-甲基-6-亚甲基-1,7-辛二烯	Terpenoids	萜类	-	-	1686-30-2	14675.1	18122.4	116146	359062	292402	363766	1.00642	0.00313581	0.0279676	6.81621	2.76897	up
D342	GC-MS	C10H16	2,4,6-Octatriene, 2,6-dimethyl-, (E,E)-	(E,E)-2,6-二甲基-2,4,6-辛三烯	Terpenoids	萜类	-	-	3016-19-1	12245.1	26567.7	36943.7	3.8867e+06	2.66825e+06	4.26947e+06	1.14372	0.0176575	0.0494017	142.884	7.1587	up
XMW0709	GC-MS	C10H16	Cyclohexane, 1-methylene-4-(1-methylethenyl)-	1-亚甲基-4-（1-甲基乙烯基）-环己烷	Terpenoids	萜类	-	-	499-97-8	2.22853e+06	2.79272e+06	7.7006e+06	2.27707e+08	1.46733e+08	2.13754e+08	1.13162	0.0161867	0.0483212	46.2349	5.53091	up
XMW0771	GC-MS	C10H16	1,5-Cyclooctadiene, 3,4-dimethyl-	3,4-二甲基-1,5-环辛二烯	Terpenoids	萜类	-	-	21284-05-9	10329.1	39247	34977.9	3.19944e+06	2.2182e+06	3.35124e+06	1.13524	0.0146697	0.0465247	103.707	6.69637	up
KMW0235	GC-MS	C10H16	1,3,6-Octatriene, 3,7-dimethyl-, (Z)-	（Z）-BETA-辛二烯	Terpenoids	萜类	-	-	3338-55-4	1.72318e+06	1.88423e+06	6.33863e+06	1.71624e+08	1.70804e+08	1.6593e+08	1.13106	3.20813e-07	0.000306305	51.1116	5.67558	up
D316	GC-MS	C10H16	Adamantane	金刚烷	Hydrocarbons	烃类	-	-	281-23-2	29677.3	7354.99	32700.1	292045	259142	422465	1.08824	0.0239351	0.0570609	13.9627	3.80351	up
XMW0452	GC-MS	C10H16	2,4,6-Octatriene, 3,4-dimethyl-	3,4-二甲基-2,4,6-辛三烯	Hydrocarbons	烃类	-	-	57396-75-5	36059.7	20222.6	29354.6	261749	266975	386509	1.13879	0.0199433	0.0524681	10.6874	3.41784	up
WMW0215	GC-MS	C10H16	.beta.-Ocimene	β-奥西米尼	Terpenoids	萜类	-	-	13877-91-3	1.72164e+06	1.88264e+06	6.33594e+06	1.71369e+08	1.70688e+08	1.65662e+08	1.13103	3.48668e-07	0.000306305	51.0772	5.67461	up
XMW1064	GC-MS	C8H12N2	1,4-Methano-1H-Cyclopropa[d]pyridazine, 4,4a,5,5a-tetrahydro-6,6-dimethyl-, (1.alpha.,4.alpha.,4a.alpha.,5a.alpha.)-	（1α，4α，4aα，5a.α 。）-4,4a，5,5a-四氢-6,6-二甲基-1,4-甲基-1H-环丙[d]哒嗪	Heterocyclic compound	杂环化合物	-	-	109746-10-3	9	9	9	1.93533e+06	1.38696e+06	2.32379e+06	1.15572	0.0202191	0.0529343	209114	17.6739	up
KMW0244	GC-MS	C8H12N2	Pyrazine, 2-methyl-5-(1-methylethyl)-	5-异丙基-2-甲基吡嗪	Heterocyclic compound	杂环化合物	-	-	13925-05-8	114387	311790	321643	1.22598e+08	9.88426e+07	1.30153e+08	1.148	0.00644131	0.0374105	470.158	8.877	up
D414	GC-MS	C9H12O	Bicyclo[3.1.0]hex-3-en-2-one, 5-(1-methylethyl)-	脱氢沙棘酮	Ketone	酮	-	-	36262-12-1	272039	159082	259429	1.06899e+06	1.01787e+06	1.48726e+06	1.12161	0.0185334	0.0507747	5.17575	2.37177	up
WMW0081	GC-MS	C9H12O	cis-2-(2-Pentenyl)furan	顺-2-（2-戊烯基）呋喃	Heterocyclic compound	杂环化合物	-	-	70424-13-4	79539.2	97703.5	262914	1.04831e+07	5.86907e+06	9.59924e+06	1.13368	0.0263798	0.0601938	58.9595	5.88165	up
XMW0603	GC-MS	C9H12O	Benzene, 1-ethyl-4-methoxy-	1-乙基-4-甲氧基-苯	Aromatics	芳烃	-	-	1515-95-3	33592.6	20963	38053.1	336561	339248	478553	1.13964	0.0161987	0.0483212	12.4649	3.6398	up
XMW1389	GC-MS	C9H12O	2,3-Dimethylanisole	2,3-二甲基苯甲醚	Ether	醚	-	-	2944-49-2	7210.97	13054.5	12940.7	1.90054e+06	1.32359e+06	2.12355e+06	1.15049	0.0176197	0.0494017	161.045	7.33132	up
D253	GC-MS	C7H8N2O	2-Acetyl-3-methylpyrazine	2-乙酰基-3-甲基吡嗪	Heterocyclic compound	杂环化合物	-	-	23787-80-6	1871.19	1555.29	7924.53	47463.6	45676.6	63559.4	1.08464	0.00742658	0.0383779	13.8049	3.78711	up
NMW0025	GC-MS	C8H8O2	Acetic acid, phenyl ester	醋酸苯酯	Ester	酯	-	-	122-79-2	67613.4	180510	190904	6.93439e+07	5.5622e+07	7.41742e+07	1.14798	0.00696306	0.0378764	453.594	8.82526	up
XMW0583	GC-MS	C8H8O2	Ethanone, 1-(3-hydroxyphenyl)-	1-（3-羟苯基）-乙酮	Ketone	酮	-	-	121-71-1	7.57632e+06	9.15719e+06	9.90858e+06	9	9	9	1.15591	0.00593659	0.036405	1.01343e-06	-19.9123	down
XMW0019	GC-MS	C8H8O2	Acetophenone, 4'-hydroxy-	4'-羟基-苯乙酮	Ketone	酮	-	-	99-93-4	492938	396863	838799	4.03212e+07	6.59069e+07	9.05741e+07	1.14427	0.0463338	0.0816535	113.851	6.831	up
XMW1318	GC-MS	C8H8O2	2-Methyl-3(2-furyl)acrolein	2-甲基-3（2-呋喃基）丙烯醛	Heterocyclic compound	杂环化合物	-	-	874-66-8	31262.5	11183.6	39210.6	291930	259142	422142	1.1013	0.0243087	0.0574837	11.9184	3.57511	up
NMW0157	GC-MS	C8H9NO	Acetamide, N-phenyl-	N-苯基-乙酰胺	Amine	胺	-	-	103-84-4	107362	68830.2	185669	2.8343e+06	1.68606e+06	2.11838e+06	1.12943	0.0236784	0.05677	18.3461	4.1974	up
NMW0176	GC-MS	C8H9NO	Benzeneacetamide	苯乙酰胺	Amine	胺	-	-	103-81-1	160288	130410	140219	1.55313e+07	8.56253e+06	1.01716e+07	1.15253	0.033161	0.0683047	79.5173	6.3132	up
XMW0206	GC-MS	C5H5N5	1H-Pyrazolo[3,4-d]pyrimidin-4-amine	1H-吡唑并[3,4-d]嘧啶-4-胺	Heterocyclic compound	杂环化合物	-	-	2380-63-4	3335.42	2333.37	3935.15	546954	386572	438909	1.15297	0.0106269	0.0411538	142.904	7.1589	up
XMW0037	GC-MS	C10H14	Benzene, 1-ethyl-3,5-dimethyl-	1-乙基-3,5-二甲基-苯	Aromatics	芳烃	-	-	934-74-7	30797.3	78345.9	84331.3	3.00212e+07	2.41155e+07	3.19913e+07	1.14847	0.00675282	0.0374105	445.165	8.7982	up
XMW0659	GC-MS	C10H14	Benzene, n-butyl-	正丁基苯	Aromatics	芳烃	-	-	104-51-8	142739	671865	488372	5.88605e+07	4.28596e+07	6.16795e+07	1.13368	0.0115163	0.0415108	125.405	6.97045	up
XMW0366	GC-MS	C10H14	Benzene, 1,2,3,5-tetramethyl-	1,2,3,5-四甲基苯	Aromatics	芳烃	-	-	527-53-7	10819.4	5826.01	15501.5	572211	328810	779780	1.13575	0.0518357	0.0873114	52.2849	5.70832	up
NMW0794	GC-MS	C10H14	Benzene, (1-methylpropyl)-	（1-甲基丙基）-苯	Aromatics	芳烃	-	-	135-98-8	54631.5	67682	179410	6.65637e+06	3.75276e+06	6.0769e+06	1.13328	0.0257994	0.0598617	54.6395	5.77187	up
KMW0273	GC-MS	C10H14	Benzene, 1,2,4,5-tetramethyl-	杜罗尔	Aromatics	芳烃	-	-	95-93-2	11722.8	5753.86	12167	571808	330125	780477	1.13982	0.0514793	0.0868868	56.7545	5.82666	up
XMW0719	GC-MS	C10H14	p-Mentha-1,5,8-triene	对薄荷脑1,5,8-三烯	Terpenoids	萜类	-	-	21195-59-5	78043.1	41799.7	103651	1.36912e+06	1.07655e+06	1.90285e+06	1.13163	0.0290092	0.06277	19.457	4.28221	up
KMW0431	GC-MS	C8H10N2	5H-5-Methyl-6,7-dihydrocyclopentapyrazine	二氢甲基环戊哌嗪	Heterocyclic compound	杂环化合物	-	-	23747-48-0	20980.3	26958.6	62948.3	1.00128e+07	9.12877e+06	1.28082e+07	1.14677	0.0107335	0.0411633	288.128	8.17057	up
D173	GC-MS	C9H10O	BenzeneacetAldehyde, 4-methyl-	4-甲基-苯乙醛	Aldehyde	醛	-	-	104-09-6	2495.39	1263.24	1658.95	9329.15	6582.9	10379.3	1.10969	0.017838	0.0495123	4.85297	2.27887	up
KMW0433	GC-MS	C9H10O	Phenol, 4-(2-propenyl)-	4-烯丙基苯酚	Aromatics	芳烃	-	-	501-92-8	153146	283135	1.64836e+06	9	9	9	1.14697	0.28338	0.330683	1.29519e-05	-16.2365	down
XMW0717	GC-MS	C9H10O	Ethanone, 1-(2-methylphenyl)-	1-（2-甲基苯基）-乙酮	Ketone	酮	-	-	577-16-2	9	9	9	1.14689e+06	1.09324e+06	1.77244e+06	1.15557	0.0255539	0.0596764	148613	17.1812	up
XMW0826	GC-MS	C7H6N2O	3-Methylisoxazolo[4,5-b]pyridine	3-甲基异唑并[4,5-b]吡啶	Heterocyclic compound	杂环化合物	-	-	83988-39-0	109303	50841.1	132525	888641	1.28418e+06	1.13551e+06	1.12032	0.0103568	0.0410063	11.304	3.49876	up
XMW0657	GC-MS	C8H7NO	Benzoxazole, 2-methyl-	2-甲基-苯并恶唑	Heterocyclic compound	杂环化合物	-	-	95-21-6	9	9	9	427732	394143	532611	1.15579	0.00842337	0.0396779	50166.2	15.6144	up
XMW1193	GC-MS	C7H16O2	1,2-Hexanediol, 2-methyl-	2-甲基-1,2-己二醇	Alcohol	醇	-	-	56255-50-6	853.306	872.077	601.533	283790	221820	300309	1.15489	0.00786046	0.0388329	346.346	8.43607	up
NMW0010	GC-MS	C10H12	Dicyclopentadiene	双环戊二烯	Terpenoids	萜类	-	-	77-73-6	29408.3	35779.9	95556.4	3.30825e+06	1.9164e+06	3.02059e+06	1.13314	0.0236633	0.05677	51.294	5.68072	up
XMW0490	GC-MS	C10H12	1-Methyl-2-phenylcyclopropane	1-甲基-2-苯基环丙烷	Aromatics	芳烃	-	-	3145-76-4	6498.54	17024.5	17672.7	6.65997e+06	5.2996e+06	7.06287e+06	1.14842	0.00703136	0.0379579	461.756	8.85099	up
KMW0219	GC-MS	C8H18O	1-Hexanol, 2-ethyl-	2-乙基己醇	Alcohol	醇	-	-	104-76-7	1419.04	2278.69	4682.57	40193.5	50351.3	44714.6	1.12051	0.00231402	0.0243647	16.1402	4.01258	up
KMW0194	GC-MS	C8H18O	2-Octanol	2-辛醇	Alcohol	醇	-	-	123-96-6	5818.83	2169.15	3751.88	25066.7	16681.4	22604.3	1.09318	0.0101991	0.0410063	5.48153	2.45458	up
XMW1397	GC-MS	C10H10	2-Methylindene	2-甲基茚	Aromatics	芳烃	-	-	2177-47-1	9	9	9	52217.2	47917.8	62847.1	1.15577	0.00660635	0.0374105	6036.37	12.5595	up
KMW0137	GC-MS	C9H20	Nonane	壬烷	Hydrocarbons	烃类	-	-	111-84-2	1.23943e+06	1.06476e+06	2.12542e+06	54321.3	35996.4	52591.5	1.14385	0.0489141	0.0845886	0.0322623	-4.95401	down
XMW0642	GC-MS	C8H16O	Cyclohexanol, 3,5-dimethyl-	3,5-二甲基环己醇	Alcohol	醇	-	-	5441-52-1	1227.56	9	9	53535.1	42802.4	58818.6	1.05061	0.00796797	0.0388329	124.568	6.96079	up
WMW0127	GC-MS	C8H16O	3-Octen-1-ol, (Z)-	（Z）-3-辛烯-1-醇	Alcohol	醇	-	-	20125-84-2	32878	73170.7	84384.9	1.5295e+07	1.22327e+07	1.62123e+07	1.14814	0.00679223	0.0374105	229.686	7.84352	up
w01	GC-MS	C8H16O	Cyclooctyl Alcohol	环辛醇	Alcohol	醇	-	-	696-71-9	9	9	9	128136	107838	149101	1.15579	0.00850407	0.0398894	14262.1	13.7999	up
XMW1237	GC-MS	C7H12O2	3-Pentenoic Acid, 2,2-dimethyl-	2,2-二甲基-3-戊烯酸	Acid	酸	-	-	16642-52-7	2645.54	2017.06	3059.81	67147.7	159085	66347.5	1.13667	0.0909556	0.135549	37.8872	5.24364	up
NMW0766	GC-MS	C7H12O2	2-Propenoic acid, butyl ester	2-丙酸丁酯	Ester	酯	-	-	141-32-2	71807.1	90131.3	152554	893163	365952	2.50423e+06	1.02047	0.215626	0.266612	11.9664	3.58092	up
NMW0230	GC-MS	C5H8N2O2	5,6-Dihydro-5-methyluracil	5,6-二氢-5-甲基尿嘧啶	Heterocyclic compound	杂环化合物	-	-	696-04-8	27583	13412.1	40200.3	689071	779605	594437	1.13289	0.00566939	0.0362222	25.4092	4.66728	up
XMW0405	GC-MS	C7H13NO	4-Piperidinone, 1,3-dimethyl-	1,3-二甲基-4-哌啶酮	Ketone	酮	-	-	4629-80-5	777.296	1683.32	1465.12	191053	152928	202170	1.14953	0.00672253	0.0374105	139.12	7.12019	up
KMW0184	GC-MS	C6H9NS	Thiazole, 2,4,5-trimethyl-	三甲基噻唑	Heterocyclic compound	杂环化合物	-	-	13623-11-5	424.252	269.113	203.496	5747	14836.8	5962.93	1.12686	0.103833	0.150399	29.5996	4.88751	up
w41	GC-MS	C8H14O	3-Octen-2-one, (E)-	（E）-3-辛烯酮	Ketone	酮	-	-	18402-82-9	5055.34	1724.63	7717.05	2.57492e+06	1.99404e+06	2.84173e+06	1.14425	0.0101433	0.0410063	511.187	8.99771	up
KMW0230	GC-MS	C8H14O	3-Octen-2-one	3-辛烯-2-酮	Ketone	酮	-	-	1669-44-9	35245.5	40343.4	141649	4.27286e+06	4.41108e+06	4.12873e+06	1.13029	5.05976e-05	0.00466038	58.9799	5.88215	up
KMW0243	GC-MS	C8H14O	(E)-2-Octenal	E-2-辛烯醛	Aldehyde	醛	-	-	2548-87-0	44436.1	99107	106430	2.46874e+07	1.92748e+07	2.62894e+07	1.14914	0.00816632	0.0393102	281.036	8.13461	up
XMW1454	GC-MS	C6H6O3	Isomaltol	1-（3-羟基呋喃-2-基）乙酮	Ketone	酮	-	-	3420-59-5	6609.65	5879.18	8254.41	159505	363979	155753	1.13712	0.0857588	0.12956	32.745	5.0332	up
XMW0028	GC-MS	C8H15N	Pyridine, 2,3,4,5-tetrahydro-6-propyl-	2,3,4,5-四氢-6-丙基-吡啶	Heterocyclic compound	杂环化合物	-	-	1604-01-9	9	9	9	46244.2	36123.7	51260.3	1.15573	0.00984476	0.0409664	4949.19	12.273	up
KMW0221	GC-MS	C7H11NO	2-Acetyl-1,4,5,6-tetrahydropyridine	2-乙酰基1,4,5,6-四氢吡啶	Heterocyclic compound	杂环化合物	-	-	25343-57-1	17849.7	25633.5	35511.7	3.65622e+06	2.86003e+06	3.90132e+06	1.15085	0.00820307	0.0393792	131.876	7.04304	up
XMW1124	GC-MS	C7H11NO	2-Azabicyclo[3.2.1]octan-3-one	2-氮杂双环[3.2.1] 辛烷-3-酮	Ketone	酮	-	-	26396-67-8	9	9	3232.4	777336	600695	847257	1.06296	0.00965722	0.0409664	684.619	9.41916	up
XMW0883	GC-MS	C9H16	1,5-Heptadiene, 2,6-dimethyl-	2,6-二甲基-1,5-庚二烯	Hydrocarbons	烃类	-	-	6709-39-3	95352.3	101104	188117	1.20567e+06	439643	3.42635e+06	1.01508	0.223094	0.273858	13.1878	3.72113	up
WMW0126	GC-MS	C9H16	1,3-Hexadiene, 3-ethyl-2-methyl-	3-乙基-2-甲基-1,3-己二烯	Hydrocarbons	烃类	-	-	61142-36-7	13040.3	3993.52	19232.5	5.13658e+06	3.95387e+06	5.59916e+06	1.14206	0.00990527	0.0409664	405.048	8.66195	up
KMW0293	GC-MS	C8H12O	2,4-Octadienal, (E,E)-	2,4-辛二烯醛	Aldehyde	醛	-	-	30361-28-5	419535	349638	485367	1.27551e+06	998017	1.87775e+06	1.09092	0.0622753	0.100939	3.309	1.7264	up
D321	GC-MS	C6H8N2O	Pyrazine, 2-methoxy-3-methyl-	2-甲氧基-3-甲基吡嗪	Heterocyclic compound	杂环化合物	-	-	2847-30-5	9	366.357	9	10872.7	9116.01	17305.8	1.06574	0.0383124	0.0739724	97.0308	6.60037	up
XMW0289	GC-MS	C7H8O2	2-Acetyl-5-methylfuran	2-乙酰基-5-甲基呋喃	Heterocyclic compound	杂环化合物	-	-	1193-79-9	226404	217024	279606	1.66412e+06	1.71934e+06	1.61158e+06	1.15127	1.41806e-05	0.00249153	6.90845	2.78836	up
KMW0258	GC-MS	C7H8O2	2-methoxy-Phenol	愈创木酚	Phenol	酚	-	-	90-05-1	15057.8	4193.03	12618.8	745770	760983	1.04582e+06	1.13724	0.0131436	0.0439873	80.0941	6.32362	up
KMW0183	GC-MS	C7H10N2	Pyrazine, 2-ethyl-5-methyl-	乙基甲基吡嗪	Heterocyclic compound	杂环化合物	-	-	13360-64-0	129581	161322	454606	1.86524e+07	1.03772e+07	1.70424e+07	1.1325	0.026808	0.0604005	61.7994	5.94952	up
KMW0190	GC-MS	C7H10N2	Pyrazine, trimethyl-	三甲基吡嗪	Heterocyclic compound	杂环化合物	-	-	14667-55-1	54085.3	44366.6	95953.2	2.44346e+06	1.52995e+06	2.28334e+06	1.14209	0.0186149	0.0507864	32.1841	5.00828	up
KMW0192	GC-MS	C8H10O	Benzene, 1-methoxy-2-methyl-	2-甲基苯甲醚	Aromatics	芳烃	-	-	578-58-5	15796.5	18659.9	46227.9	1.96002e+06	1.07603e+06	1.79808e+06	1.13654	0.0280411	0.0617211	59.9142	5.90483	up
NMW0022	GC-MS	C8H10O	Benzenemethanol, .alpha.-methyl-	α-甲基-苯甲醇	Alcohol	醇	-	-	98-85-1	206195	562685	583735	1.85391e+08	1.47828e+08	1.97593e+08	1.14745	0.00711981	0.0379579	392.434	8.61631	up
KMW0703	GC-MS	C8H10O	Phenol, 4-ethyl-	对氢乙苯	Aromatics	芳烃	-	-	123-07-9	6011.51	6213.83	7949.84	203731	195348	309562	1.15034	0.0246765	0.0581969	35.1244	5.1344	up
KMW0284	GC-MS	C8H10O	Phenylethyl Alcohol	2-苯乙醇	Alcohol	醇	-	-	60-12-8	65032.5	29816.3	85670.8	1.37087e+06	1.07931e+06	1.90548e+06	1.1293	0.028441	0.0621527	24.1284	4.59266	up
XMW3734	GC-MS	C7H6O2	2-hydroxy-BenzAldehyde	2-羟基苯甲醛	Aldehyde	醛	-	-	90-02-8	5358.07	20202.9	14461.3	1.92996e+06	1.3571e+06	2.01954e+06	1.13942	0.0136551	0.0446045	132.591	7.05084	up
NMW0044	GC-MS	C8H11N	BenzenAmine, N-ethyl-	N-乙基-苯胺	Amine	胺	-	-	103-69-5	2620.33	2785.88	4211.42	13445.8	7570.48	16511.5	1.06848	0.0662774	0.106736	3.90198	1.96421	up
XMW1385	GC-MS	C6H7N3	3-Imidazol-1-ylpropanenitrile	3-咪唑-1-基丙腈	Heterocyclic compound	杂环化合物	-	-	23996-53-4	33310.2	18728.3	357193	4.31296e+06	3.63885e+06	5.13087e+06	1.0614	0.00724227	0.0379841	31.9689	4.9986	up
D392	GC-MS	C7H7NO	Ethanone, 1-(3-pyridinyl)-	1-（3-吡啶基）-乙酮	Ketone	酮	-	-	350-03-8	51820.4	38707.2	51539.7	161607	135852	201105	1.12571	0.0202458	0.0529343	3.50934	1.8112	up
NMW0012	GC-MS	C9H12	Benzene, 1,2,3-trimethyl-	1,2,3-三甲基苯	Aromatics	芳烃	-	-	526-73-8	82507.8	17153.7	62749.3	242990	278820	249055	1.01102	0.00220843	0.0236599	4.74639	2.24683	up
KMW0169	GC-MS	C5H12OS	3-Mercapto-3-methylbutanol	巯基甲基丁醇	Sulfur compounds	含硫化合物	-	-	34300-94-2	213565	210852	406337	105253	126243	125712	1.01156	0.133342	0.181124	0.429981	-1.21765	down
KMW0233	GC-MS	C8H8O	Acetophenone	苯乙酮	Ketone	酮	-	-	98-86-2	114319	312958	321192	1.17917e+08	9.51592e+07	1.26501e+08	1.14787	0.00678275	0.0374105	453.696	8.82558	up
KMW0212	GC-MS	C8H8O	BenzeneacetAldehyde	苯乙醛	Aldehyde	醛	-	-	122-78-1	150969	684031	511454	5.90211e+07	4.31235e+07	6.18613e+07	1.13418	0.0113224	0.0413481	121.806	6.92844	up
XMW0015	GC-MS	C8H8O	BenzAldehyde, 4-methyl-	4-甲基-苯甲醛	Aldehyde	醛	-	-	104-87-0	7376.5	3916.63	16124.1	36435.5	38935.4	46594.8	1.0305	0.0029571	0.0275429	4.4485	2.15332	up
NMW0023	GC-MS	C8H8O	BenzAldehyde, 2-methyl-	2-甲基-苯甲醛	Aldehyde	醛	-	-	529-20-4	343140	832640	790337	2.42187e+08	1.95569e+08	2.58027e+08	1.14949	0.00650287	0.0374105	353.887	8.46714	up
NMW0777	GC-MS	C4H8S2	DiSulfur compounds, methyl 2-propenyl	二硫化二甲基2-丙烯基	Sulfur compounds	含硫化合物	-	-	2179-58-0	11986.8	2645.4	15598.7	77328.4	60164.6	68787.2	1.0273	0.000959697	0.0163708	6.82348	2.77051	up
NMW0774	GC-MS	C6H14O2	Ethanol, 2-butoxy-	2-丁氧基乙醇	Alcohol	醇	-	-	111-76-2	1.21891e+06	1.0664e+06	2.07342e+06	52834	35554.9	52619.4	1.14443	0.0462179	0.0816014	0.0323508	-4.95006	down
NMW0011	GC-MS	C8H6O	Benzofuran	苯并呋喃	Heterocyclic compound	杂环化合物	-	-	271-89-6	1898.17	2123.41	6589.3	215134	119743	194041	1.12922	0.0266325	0.0602262	49.8467	5.63943	up
KMW0159	GC-MS	C7H16O	1-Heptanol	1-庚醇	Alcohol	醇	-	-	111-70-6	234740	234093	447396	121601	132623	143037	1.01281	0.134068	0.18177	0.433583	-1.20562	down
D372	GC-MS	C7H14O	2-Hepten-1-ol, (E)-	（E）-2-庚-1-醇	Alcohol	醇	-	-	33467-76-4	223032	218038	422301	116553	116690	124021	1.02776	0.128765	0.176281	0.413802	-1.27299	down
WMW0103	GC-MS	C7H14O	2-Cyclopentylethanol	2-环戊基乙醇	Alcohol	醇	-	-	766-00-7	207489	243076	655082	2.12923e+07	1.26612e+07	1.96356e+07	1.13332	0.0218295	0.0545766	48.4685	5.59898	up
KMW0122	GC-MS	C7H14O	Heptanal	庚醛	Aldehyde	醛	-	-	111-71-7	3.20748e+06	2.82187e+06	3.2499e+06	118634	65781.2	110077	1.14799	0.0018166	0.0218615	0.0317367	-4.9777	down
D350	GC-MS	C6H10O2	2-Pentenoic Acid, 2-methyl-	2-甲基-2-戊烯酸	Acid	酸	-	-	3142-72-1	210866	207665	393219	96263.7	112852	124506	1.02665	0.119176	0.166053	0.410991	-1.28282	down
w43	GC-MS	C6H10O2	2-Oxepanone	2-氧戊酮	Ketone	酮	-	-	502-44-3	6162.64	12243.5	16701.3	2.34393e+06	1.78122e+06	2.47714e+06	1.1473	0.00934749	0.0406523	188.059	7.55504	up
XMW1203	GC-MS	C5H6O3	2,5-Furandione, dihydro-3-methyl-	二氢-3-甲基-2,5-呋喃二酮	Ketone	酮	-	-	4100-80-5	6598.37	12243.5	15856.1	2.33599e+06	1.77657e+06	2.48401e+06	1.14893	0.00955244	0.0409664	190.114	7.57072	up
XMW0488	GC-MS	C6H11NO	2-Acetylpyrrolidine	2-乙酰基吡咯烷	Heterocyclic compound	杂环化合物	-	-	60026-20-2	15443.8	10754.4	21792.5	412445	423050	396634	1.14651	5.44302e-05	0.00466038	25.6744	4.68226	up
XMW0765	GC-MS	C7H12O	4-Heptenal	顺-4-庚烯醛	Aldehyde	醛	-	-	62238-34-0	9	9	9	44492	69563.4	52181.6	1.15507	0.0174476	0.0494017	6156.93	12.588	up
KMW0123	GC-MS	C7H12O	4-Heptenal, (Z)-	4庚醛	Aldehyde	醛	-	-	6728-31-0	1668.85	9	9	20379.1	24634.8	24969.9	1.00841	0.00163689	0.0211973	41.4878	5.37461	up
D373	GC-MS	C7H12O	2,4-Heptadien-1-ol, (E,E)-	（E，E）-2,4-庚二烯-1-醇	Alcohol	醇	-	-	33467-79-7	365995	434853	1.12236e+06	3.72101e+07	2.18563e+07	3.42489e+07	1.13421	0.0227673	0.055869	48.5208	5.60053	up
XMW0276	GC-MS	C7H12O	4-Hexen-3-one, 5-methyl-	5-甲基-4-己烯-3-酮	Ketone	酮	-	-	13905-10-7	59272.8	59031.6	89293.4	323591	548748	508686	1.12475	0.0279156	0.0616953	6.6524	2.73388	up
KMW0539	GC-MS	C6H8O2	2(5H)-Furanone, 5-ethyl-	乙基呋喃酮	Heterocyclic compound	杂环化合物	-	-	2407-43-4	477729	446368	902238	172507	193615	219236	1.06461	0.105286	0.151758	0.32051	-1.64156	down
KMW0136	GC-MS	C6H9NO	2-Acetyl-1-pyrroline	乙酰吡咯啉	Heterocyclic compound	杂环化合物	-	-	85213-22-5	26643	5514.37	29078.8	195188	161070	205337	1.056	0.00135531	0.0189464	9.17097	3.19707	up
XMW1467	GC-MS	C6H10N2	1H-Pyrazole, 1,3,5-trimethyl-	1,3,5-三甲基-1H-吡唑	Heterocyclic compound	杂环化合物	-	-	1072-91-9	70549.9	21912.8	97157.4	3.165e+07	2.4635e+07	3.48823e+07	1.14381	0.00979833	0.0409664	480.789	8.90926	up
XMW0884	GC-MS	C7H10O	5-Hexenal, 4-methylene-	4-亚甲基-5-己烯	Hydrocarbons	烃类	-	-	17844-21-2	129325	91873.7	318573	895425	749621	909986	1.05482	0.0021469	0.0233844	4.73354	2.24292	up
XMW0714	GC-MS	C6H7NO	3-Acetyl-1H-pyrroline	3-乙酰基-1H-吡咯啉	Heterocyclic compound	杂环化合物	-	-	1072-82-8	8371.6	3093.1	17191.9	267318	217616	292790	1.11058	0.00627068	0.0369968	27.1394	4.76232	up
KMW0240	GC-MS	C6H7NO	Ethanone, 1-(1H-pyrrol-2-yl)-	2-乙酰基吡咯	Heterocyclic compound	杂环化合物	-	-	1072-83-9	67664.2	180510	189109	6.93413e+07	5.56193e+07	7.41624e+07	1.14807	0.00695883	0.0378764	455.364	8.83088	up
NMW0021	GC-MS	C6H8N2	2-PyridinemethanAmine	2-吡啶甲胺	Amine	胺	-	-	3731-51-9	60713.7	226345	157833	1.80426e+07	1.30943e+07	1.89181e+07	1.139	0.011764	0.0415328	112.51	6.81391	up
KMW0382	GC-MS	C7H8O	Phenol, 2-methyl-	邻甲酚	Aromatics	芳烃	-	-	95-48-7	14232.3	18306.1	20773.6	1.16246e+06	873883	1.21669e+06	1.15268	0.00978569	0.0409664	61.0186	5.93118	up
KMW0323	GC-MS	C7H8O	Benzyl Alcohol	苯甲醇	Alcohol	醇	-	-	100-51-6	504450	607888	2.05303e+06	6.46132e+07	6.53801e+07	6.16498e+07	1.13084	3.70153e-05	0.00464542	60.5438	5.91991	up
XMW0114	GC-MS	C6H5NO	Benzene, nitroso-	亚硝基苯	Aromatics	芳烃	-	-	586-96-9	288681	356874	966435	3.29566e+07	1.9558e+07	3.03278e+07	1.13271	0.0219077	0.0545984	51.3914	5.68345	up
KMW0160	GC-MS	C4H10OS	1-Propanol, 3-(methylthio)-	3-（甲硫基）-1-丙醇	Alcohol	醇	-	-	505-10-2	1.0681e+06	537999	768369	2.49428e+06	2.99592e+06	2.48377e+06	1.09745	0.00126705	0.0185517	3.3582	1.74769	up
XMW0441	GC-MS	C2H2ClN3	1H-1,2,4-Triazole, 3-chloro-	3-氯-1,2,4-三氮唑	Halogenated hydrocarbons	卤代烃	-	-	6818-99-1	9	9	9	5781.67	11488.6	8417.31	1.15338	0.0352167	0.0705831	951.391	9.89389	up
XMW0892	GC-MS	C3H6N2O2	Propanediamide	丙二酰胺	Amine	胺	-	-	108-13-4	2525.81	1531.41	4078.53	21210.5	21289	33364.9	1.11242	0.0272447	0.060902	9.32481	3.22107	up
XMW1116	GC-MS	C6H12O	4-Hexen-1-ol, (E)-	（E）-4-己烯-1-醇	Alcohol	醇	-	-	928-92-7	2571.55	1574.52	2153.88	124612	104110	147797	1.15228	0.0102654	0.0410063	59.7654	5.90124	up
KMW0098	GC-MS	C6H12O	3-Hexen-1-ol, (Z)-	（Z）-3-己烯醇	Alcohol	醇	-	-	928-96-1	3438.41	1305.94	2684.14	725810	393650	1.11115e+06	1.14468	0.0701272	0.111343	300.277	8.23015	up
XMW0710	GC-MS	CH4N6	1H-Tetrazole-1,5-diAmine	1H-四唑-1,5-二胺	Amine	胺	-	-	2165-21-1	1.23005e+06	1.0884e+06	520110	4.53434e+07	3.19753e+07	3.76488e+07	1.14425	0.0103897	0.0410063	40.5021	5.33992	up
NMW0017	GC-MS	C5H9NO	2-Pyrrolidinone, 1-methyl-	1-甲基-2-吡咯烷酮	Heterocyclic compound	杂环化合物	-	-	872-50-4	9	9	9	47395	39372	45865.9	1.15591	0.00308151	0.027812	4912.33	12.2622	up
XMW1120	GC-MS	C4H5NS	Thiocyanic acid, 2-propenyl ester	硫氰酸烯丙酯	Ester	酯	-	-	764-49-8	994903	880717	1.18387e+06	53311	31517.8	43706	1.14824	0.00784237	0.0388329	0.0420118	-4.57306	down
XMW0201	GC-MS	C6H10O	4-Hexen-3-one	4-己烯-3-酮	Ketone	酮	-	-	2497-21-4	93801.5	92918	184221	1.14657e+06	439630	3.29137e+06	1.01878	0.221741	0.272637	13.1492	3.7169	up
XMW1115	GC-MS	C6H10O	Isopropenyl ethyl ketone	异丙烯基乙基酮	Ketone	酮	-	-	25044-01-3	17243.3	9517.48	33228	141899	134189	140279	1.08979	0.00151882	0.0205628	6.94075	2.79509	up
XMW0444	GC-MS	C2H3N5	1,2,4,5-Tetrazin-3-Amine	1,2,4,5-替他嗪-3-胺	Amine	胺	-	-	79329-74-1	56606.7	56714.3	110510	27602.4	29813.5	31631.6	1.02945	0.128771	0.176281	0.397833	-1.32977	down
XMW0123	GC-MS	C4H3NO2	1H-Pyrrole-2,5-dione	1H-吡咯-2,5-二酮	Amine	胺	-	-	541-59-3	13438.3	14175.5	17938.1	87433.2	99821.7	86922.9	1.14762	0.00134734	0.0189464	6.01902	2.58953	up
KMW0129	GC-MS	C6H8O	2,4-Hexadienal, (E,E)-	2,4-己二醛	Aldehyde	醛	-	-	142-83-6	1.19788e+06	1.0525e+06	1.12931e+06	35862.2	24411.5	35875.4	1.1519	0.00135871	0.0189464	0.0284491	-5.13547	down
XMW1430	GC-MS	C5H4O2	3-FurAldehyde	3-甲醛	Aldehyde	醛	-	-	498-60-2	97435.8	78242.2	44512.3	8193.31	7650.2	5059.27	1.12264	0.0496689	0.085031	0.0949305	-3.39698	down
XMW0670	GC-MS	C4H5N3	Acetonitrile, 2,2'-iminobis-	2,2'-亚氨基二-乙腈	Heterocyclic compound	杂环化合物	-	-	628-87-5	460086	360681	435052	873571	814718	1.07166e+06	1.11419	0.013967	0.0451935	2.19772	1.13601	up
NMW0059	GC-MS	C5H6N2	4-Aminopyridine	4-氨基吡啶	Heterocyclic compound	杂环化合物	-	-	504-24-5	16462.4	15394.6	123503	1.24161e+06	1.92426e+06	1.64254e+06	1.08623	0.0136835	0.0446045	30.95	4.95187	up
KMW0060	GC-MS	C7H8	Toluene	甲苯	Aromatics	芳烃	-	-	108-88-3	15661.9	22101.9	38196.5	168081	160508	237459	1.11153	0.016283	0.0483519	7.4519	2.89761	up
XMW0076	GC-MS	C5H4N2	1H-Pyrrole-3-carbonitrile	1H-吡咯-3-腈	Heterocyclic compound	杂环化合物	-	-	7126-38-7	379994	480029	1.6998e+06	6.20291e+07	6.35131e+07	5.96484e+07	1.13033	6.60233e-05	0.00466038	72.3452	6.17682	up
KMW0048	GC-MS	C5H12O	1-Butanol, 3-methyl-	3-甲基-1-丁醇	Alcohol	醇	-	-	123-51-3	95525.5	49623.5	165274	741599	717820	678251	1.09295	0.000445508	0.0107227	6.88631	2.78373	up
XMW0655	GC-MS	C4H8O2	2-Butene-1,4-diol, (Z)-	（Z）-2-丁烯-1,4-二醇	Alcohol	醇	-	-	6117-80-2	860775	766877	920334	29924.6	18942.4	28891.4	1.15061	0.00278857	0.0267733	0.0305176	-5.03421	down
XMW1224	GC-MS	C2H4N2O2	Ethanediamide	乙二酰胺	Amine	胺	-	-	471-46-5	4612.35	4326.45	2609.36	43120.5	39581.3	46927.1	1.14405	0.00148057	0.0204832	11.2251	3.48865	up
XMW0042	GC-MS	C2H3N3O	3H-1,2,4-Triazol-3-one, 1,2-dihydro-	1,2-二氢-3H-1,2,4-三唑-3-酮	Heterocyclic compound	杂环化合物	-	-	930-33-6	440655	303457	380139	20214	12258.3	12744.1	1.14657	0.0117003	0.0415301	0.0402191	-4.63598	down
XMW0573	GC-MS	C4H8N2	1,5-Diazabicyclo[3.1.0]hexane	1,5-二氮杂双环[3.1.0]己烷	Heterocyclic compound	杂环化合物	-	-	13090-31-8	6535.7	3203.67	25021.3	182709	146686	219006	1.07373	0.00906123	0.0401646	15.7765	3.9797	up
XMW1388	GC-MS	C4H8N2	1H-Imidazole, 4,5-dihydro-2-methyl-	1H-咪唑，4,5-二氢-2-甲基-	Heterocyclic compound	杂环化合物	-	-	534-26-9	1.40862e+06	1.25474e+06	1.49626e+06	54499.8	36820.8	52587.9	1.15155	0.00263089	0.0257471	0.0345966	-4.85323	down
XMW0650	GC-MS	C5H8O	2-Butenal, 3-methyl-	3-甲基-2-丁醛	Aldehyde	醛	-	-	107-86-8	4275.04	3431.3	5346.54	167520	176080	229361	1.15151	0.0105258	0.0410063	43.8954	5.456	up
KMW0047	GC-MS	C5H8O	2-Butenal, 2-methyl-	甲基-2-丁烯醛	Aldehyde	醛	-	-	1115-11-3	96517.2	49257.8	185902	741651	719353	781297	1.08133	0.0010506	0.0167095	6.7605	2.75713	up
XMW0132	GC-MS	C5H9N	Pyridine, 2,3,4,5-tetrahydro-	2,3,4,5-四氢吡啶	Heterocyclic compound	杂环化合物	-	-	505-18-0	91120.6	48966.8	178126	723585	673750	736156	1.084	0.000829502	0.0154229	6.70459	2.74515	up
XMW0065	GC-MS	C4H6N2	Fomepizole	甲吡唑	Heterocyclic compound	杂环化合物	-	-	7554-65-6	15097.4	4015.6	19397.5	280881	155881	538203	1.08632	0.108888	0.154863	25.3169	4.66203	up
XMW1208	GC-MS	CH2N4	1H-Tetrazole	1H-四唑	Heterocyclic compound	杂环化合物	-	-	288-94-8	9506.82	3704.6	8618.87	56616.7	60786.2	59322.8	1.11447	5.27621e-05	0.00466038	8.09543	3.01711	up
D207	GC-MS	C2H5NO	Acetamide	乙酰胺	Amine	胺	-	-	60-35-5	12452.1	10748.6	12995.4	706.592	2515.85	959.532	1.09904	0.00031933	0.00879196	0.115536	-3.11358	down
