# Supplementary material for: Metabolomics Analysis Reveals the Differences Between Bupleurum chinense DC. and Bupleurum scorzonerifolium Willd
Source: Front Plant Sci. 2022 Jul 13;13:933849. doi: 10.3389/fpls.2022.933849 (PMC9328751; doi:10.3389/fpls.2022.933849)
Supplement: Supplementary file 8 [file Table_8.XLSX]

## Sheet: some spectrums
mw ID	Level	Ion mode	Q1 (Da)	Q3 (Da)	Rt (min)	Molecular Weight (Da)	Formula	Ionization model	KEGG ID	Compounds	物质	Class I	物质一级分类	Class II	物质二级分类	CAS	Family	物种组织	科
Lmfn000604	1	Negative	331.067	169.014	1.61	332.074	C13H16O10	[M-H]-	-	6-O-Galloyl-D-glucose	6-O-没食子酰-D-葡萄糖	Phenolic acids	酚酸类	Phenolic acids	酚酸类	13186-19-1	-	枫树	槭树科槭树属
Lmzn001894	1	Negative	461.074	285.041	4.3	462.08	C21H18O12	[M-H]-	-	Kaempferol-3-O-glucuronide	山奈酚-3-O-葡萄糖醛酸苷	Flavonoids	黄酮	Flavonols	黄酮醇	22688-78-4	all	紫苏梗	唇形科紫苏属
Lmmp006709	1	Positive	579.15	287.056	5.89	578.142	C30H26O12	[M+H]+	-	Kaempferol-3-O-(4''-p-coumaroyl)rhamnoside	山奈酚-3-O-(4''-对香豆酰基)鼠李糖苷	Flavonoids	黄酮	Flavonols	黄酮醇	-	-	木麻黄	木麻黄科木麻黄属
Lhcp102425	1	Positive	619.417	455.352	7.48	618.413	C36H58O8	[M+H]+	-	Prosaikogenin G	前柴胡皂苷元G	Terpenoids	萜类	Triterpene Saponin	三萜皂苷	-	-	柴胡	伞形科
Zmcp102707	2	Positive	765.476	421.346	7.02	764.471	C42H68O12	[M+H]+	-	Saikosaponin E	柴胡皂苷E	Terpenoids	萜类	Triterpene Saponin	三萜皂苷	-	-	多枝柴胡	景天科
Lhcp102421	2	Positive	781.471	455.351	5.33	780.466	C42H68O13	[M+H]+	-	Saikosapanin B1	柴胡皂苷B1	Terpenoids	萜类	Triterpene Saponin	三萜皂苷	-	-	柴胡	伞形科
Zmcp102709	1	Positive	797.465	489.357	5.49	796.461	C42H68O14	[M+H]+	-	Saikosaponin L	柴胡皂苷L	Terpenoids	萜类	Triterpene Saponin	三萜皂苷	-	-	黑柴胡	景天科
mws2187	2	Negative	811.485	649.4	6.29	812.492	C43H72O14	[M-H]-	-	Saikosaponin B4	柴胡皂苷 B4	Terpenoids	萜类	Triterpene Saponin	三萜皂苷	58558-09-1	F0041	-	伞形科
Zmcp102719	1	Positive	913.513	437.34	6.44	912.508	C47H76O17	[M+H]+	-	saikosaponin K	柴胡皂苷K	Terpenoids	萜类	Triterpene Saponin	三萜皂苷	-	-	黑柴胡	景天科
Zmcp102716	1	Positive	913.513	437.34	6.44	912.508	C47H76O17	[M+H]+	-	Rotundifolioside A	圆叶柴胡果苷A	Terpenoids	萜类	Triterpene Saponin	三萜皂苷	-	-	圆叶柴胡	景天科
Lhcp102415	1	Positive	927.524	421.346	5.74	926.524	C48H78O17	[M+H]+	C08976	Saikosaponin BK1	柴胡皂苜BK1	Terpenoids	萜类	Triterpene Saponin	三萜皂苷	110352-77-7	-	柴胡	伞形科
Zmcp102804	1	Positive	927.532	421.348	5.75	926.524	C48H78O17	[M+H]+	-	saikosaponin C	柴胡皂苷C	Terpenoids	萜类	Triterpene Saponin	三萜皂苷	-	-	柴胡	景天科
Lhcp102414	1	Positive	929.543	423.361	5.79	928.54	C48H80O17	[M+H]+	-	Saikosaponin F	柴胡皂苷F	Terpenoids	萜类	Triterpene Saponin	三萜皂苷	62687-63-2	-	柴胡	伞形科
Lhcp102411	2	Positive	943.523	437.34	5.29	942.519	C48H78O18	[M+H]+	-	Saikosaponin S	柴胡皂苷S	Terpenoids	萜类	Triterpene Saponin	三萜皂苷	-	-	柴胡	伞形科
mws0918	3	Negative	283.061	268	6.95	284.068	C16H12O5	[M-H]-	C10521	Prunetin (5,4'-Dihydroxy-7-methoxyisoflavone)	樱黄素	Flavonoids	黄酮	Isoflavones	异黄酮	552-59-0	283.061	all	-	all
mws1174	3	Negative	313.072	253	7.13	314.079	C17H14O6	[M-H]-	C16418	3-O-Acetylpinobanksin	3-O-乙酰短叶松黄烷酮	Flavonoids	黄酮	Dihydroflavonol	二氢黄酮醇	52117-69-8	313.072	all	-	all
Smgp109120	3	Positive	417.19	151.07	6.99	416.184	C23H28O7	[M+H]+	-	epimagnolin	epimagnolin	Lignans and Coumarins	木脂素和香豆素	Lignans	木脂素	-	417.191	-	广玉兰	木兰科木兰属
Hmmp003156	3	Positive	595.164	313.07	3.24	594.158	C27H30O15	[M+H]+	C08064	Saponarin(Isovitexin-7-O-glucoside)	皂草苷(异牡荆素-7-O-葡萄糖苷)	Flavonoids	黄酮	Flavonoid	黄酮	20310-89-8	595.166	F0047	王不留行	石竹科
pmb0645	3	Positive	627.192	465.2	3.37	626.185	C28H34O16	[M+H]+	-	Hesperetin-6-C-glucoside-7-O-glucoside	橙皮素-6-C-葡萄糖苷-7-O-葡萄糖苷	Flavonoids	黄酮	Flavonoid carbonoside	黄酮碳糖苷	-	627.193	all	-	all
Lmcn005735	3	Negative	623.199	315.08	4.6	624.205	C29H36O15	[M-H]-	C17393	Methylhesperidin	甲基橙皮苷	Flavonoids	黄酮	Flavonoid	黄酮	11013-97-1	623.198	F0063	茶枝柑果实	芸香科柑橘属
Hmsn003050	3	Negative	693.385	633.36	5.79	694.39	C37H58O12	[M-H]-	-	Esculentoside D	商陆皂苷 D	Terpenoids	萜类	Triterpene Saponin	三萜皂苷	89808-50-4	F0078	商陆	商陆科
mws2190	3	Negative	779.459	617.3	7.62	780.466	C42H68O13	[M-H]-	-	Saikosaponin D	柴胡皂苷 D	Terpenoids	萜类	Triterpene	三萜	20874-52-6	779.458	F0041	-	伞形科
mws2188	3	Negative	779.459	617.4	6.58	780.466	C42H68O13	[M-H]-	C08975	Saikosaponin A	柴胡皂苷 A	Terpenoids	萜类	Triterpene	三萜	20736-09-8	779.458	F0041	-	伞形科
mws2191	3	Negative	779.459	617.4	7.37	780.466	C42H68O13	[M-H]-	-	Saikosaponin G	柴胡皂苷 G	Terpenoids	萜类	Triterpene Saponin	三萜皂苷	99365-19-2	779.458	F0041	-	伞形科
mws2194	3	Negative	811.485	649.4	6.23	812.492	C43H72O14	[M-H]-	-	Saikosaponin B3	柴胡皂苷 B3	Terpenoids	萜类	Triterpene	三萜	58316-42-0	811.485	F0041	-	伞形科
Lmmn005003	3	Negative	1087.51	1087.5	5.33	1088.5	C52H80O24	[M-H]-	-	Medicagenic acid-3-O-glucuronide-28-O-xylosyl(1,4)-rhamnosyl(1,2)-arabinoside	苜蓿酸-3-O-葡萄糖醛酸苷-28-O-木糖基(1,4)-鼠李糖基(1,2)-阿拉伯糖苷	Terpenoids	萜类	Triterpene Saponin	三萜皂苷	128192-15-4	F0010	紫花苜蓿	豆科
Lmhp010254	2	Positive	487.233	359.149	9.5	486.225	C27H34O8	[M+H]+	-	Kadsuralignan J	日本南五味子木脂素 J	Lignans and Coumarins	木脂素和香豆素	Lignans	木脂素	-	F0035	黑老虎	木兰科南五味子属
Lmnp102682	2	Positive	595.17	463.13	3.8	594.158	C27H30O15	[M+H]+	-	Hispidulin-8-C-(2''-O-xylosyl)glucoside	高车前素-8-C-(2''-O-木糖基)葡萄糖苷	Flavonoids	黄酮	Flavonoid carbonoside	黄酮碳糖苷	-	F0069	牛耳草	苦苣苔科
pmn001505	2	Negative	763.427	763.4	7.59	764.435	C41H64O13	[M-H]-	-	Oleanolic acid-3-O-xylosyl(1→3)glucuronide	齐墩果酸-3-O-木糖基(1→3)葡萄糖醛酸苷	Terpenoids	萜类	Triterpene Saponin	三萜皂苷	-	all	地肤子	藜科
Hmmp006067	2	Positive	798.499	439.358	7.12	780.467	C42H68O13	[M+NH4]+	-	Oleanolic acid-3-O-glucosyl(1→2)glucoside	齐墩果酸-3-O-葡萄糖基(1→2)葡萄糖苷	Terpenoids	萜类	Triterpene Saponin	三萜皂苷	-	F0082	-	木通科
Zmcp102701	2	Positive	929.549	423.363	5.5	928.54	C48H80O17	[M+H]+	-	Rotundifolioside C	圆叶柴胡果苷C	Terpenoids	萜类	Triterpene Saponin	三萜皂苷	-	-	圆叶柴胡	景天科
	Level：物质鉴定级别（1：样本物质二级质谱（物质所有碎片子离子）、RT与数据库物质匹配得分为0.7分以上 2：样本物质二级质谱（物质所有碎片子离子）、RT与数据库物质匹配得分为0.5-0.7分 3：样本物质Q1、Q3、RT、DP、CE与数据库物质核对一致）
Secondary spectra of some substances:
Lmfn000604
Lmzn001894
Lmhp010254
Lmmp006709
Lmnp102682
Lhcp102425
pmn001505
Zmcp102707
Lhcp102421
Zmcp102709
Hmmp006067
mws2187
Zmcp102719
Zmcp102716
Lhcp102415
Zmcp102804
Lhcp102414
Zmcp102701
Lhcp102411

## Sheet: substance（by standards） 
Index	Platform	Q1 (Da)	Q3 (Da)	Quantitative ion	Qualitative ion	Molecular Weight (Da)	Formula	Ionization model	Compounds	物质	Class I	物质一级分类	Class II	物质二级分类	CAS	remark
KMW0574	GC-MS	-	-	131	103	176.084	C11H12O2	-	2-Propenoic acid, 3-phenyl-, ethyl ester	肉桂酸乙酯	Ester	酯	-	-	103-36-6	The substance compared with standards: GC-MS 34, LC-MS 380, in total 414. Structure can be queried according to CAS.
KMW0342	GC-MS	-	-	154	95	154.136	C10H18O	-	Citronellal	香茅醛	Terpenoids	萜类	-	-	106-23-0
WMW0087	GC-MS	-	-	71	43	158.131	C9H18O2	-	Butanoic Acid, 3-methylbutyl ester	丁酸异戊酯	Acid	酸	-	-	106-27-4
KMW0070	GC-MS	-	-	91	106	106.078	C8H10	-	Benzene, 1,3-dimethyl-	间二甲苯	Aromatics	芳烃	-	-	108-38-3
KMW0542	GC-MS	-	-	88	101	200.178	C12H24O2	-	Decanoic acid, ethyl ester	癸酸乙酯	Ester	酯	-	-	110-38-3
KMW0122	GC-MS	-	-	70	41	114.104	C7H14O	-	Heptanal	庚醛	Aldehyde	醛	-	-	111-71-7
XMW0017	GC-MS	-	-	74	87	270.256	C17H34O2	-	Hexadecanoic acid, methyl ester	十六酸甲酯	Ester	酯	-	-	112-39-0
KMW0726	GC-MS	-	-	55	69	214.23	C14H30O	-	1-Tetradecanol	十四醇	Alcohol	醇	-	-	112-72-1
XMW0289	GC-MS	-	-	109	124	124.052	C7H8O2	-	2-Acetyl-5-methylfuran	2-乙酰基-5-甲基呋喃	Heterocyclic compound	杂环化合物	-	-	1193-79-9
KMW0212	GC-MS	-	-	91	92	120.058	C8H8O	-	BenzeneacetAldehyde	苯乙醛	Aldehyde	醛	-	-	122-78-1
NMW0025	GC-MS	-	-	94	43	136.052	C8H8O2	-	Acetic acid, phenyl ester	醋酸苯酯	Ester	酯	-	-	122-79-2
KMW0703	GC-MS	-	-	107	122	122.073	C8H10O	-	Phenol, 4-ethyl-	对氢乙苯	Aromatics	芳烃	-	-	123-07-9
KMW0105	GC-MS	-	-	70	55	130.099	C7H14O2	-	1-Butanol, 3-methyl-, acetate	乙酸异戊酯	Ester	酯	-	-	123-92-2
KMW0282	GC-MS	-	-	57	41	142.136	C9H18O	-	Nonanal	正壬醛	Aldehyde	醛	-	-	124-19-6
KMW0554	GC-MS	-	-	121	93	192.151	C13H20O	-	.alpha.-Ionone	α-紫罗兰酮	Terpenoids	萜类	-	-	127-41-3
KMW0220	GC-MS	-	-	93	91	136.125	C10H16	-	3-Carene	δ-3-蒈烯	Terpenoids	萜类	-	-	13466-78-9
KMW0518	GC-MS	-	-	69	93	196.146	C12H20O2	-	2,6-Octadien-1-ol, 3,7-dimethyl-, acetate, (Z)-	乙酸橙花酯	Ester	酯	-	-	141-12-8
KMW0067	GC-MS	-	-	83	55	98.073	C6H10O	-	3-Penten-2-one, 4-methyl-	4-甲基-3-戊烯-2-酮	Ketone	酮	-	-	141-79-7
KMW0204	GC-MS	-	-	69	56	144.115	C8H16O2	-	Acetic acid, hexyl ester	乙酸己酯	Ester	酯	-	-	142-92-7
KMW0243	GC-MS	-	-	41	55	126.104	C8H14O	-	(E)-2-Octenal	E-2-辛烯醛	Aldehyde	醛	-	-	2548-87-0
KMW0297	GC-MS	-	-	59	94	170.131	C10H18O2	-	trans-Linalool oxide (furanoid)	（E）-芳樟醇氧化物	Heterocyclic compound	杂环化合物	-	-	34995-77-2
w43	GC-MS	-	-	42	55	114.068	C6H10O2	-	2-Oxepanone	2-氧戊酮	Ketone	酮	-	-	502-44-3
NMW0012	GC-MS	-	-	105	120	120.094	C9H12	-	Benzene, 1,2,3-trimethyl-	1,2,3-三甲基苯	Aromatics	芳烃	-	-	526-73-8
KMW0217	GC-MS	-	-	68	93	136.125	C10H16	-	D-Limonene	（+）-柠檬烯	Terpenoids	萜类	-	-	5989-27-5
KMW0284	GC-MS	-	-	91	92	122.073	C8H10O	-	Phenylethyl Alcohol	2-苯乙醇	Alcohol	醇	-	-	60-12-8
WMW0075	GC-MS	-	-	41	69	222.198	C15H26O	-	1,6,10-Dodecatrien-3-ol, 3,7,11-trimethyl-	3,7,11-三甲基-1,6,10-十二碳三烯-3-醇	Terpenoids	萜类	-	-	7212-44-4
KMW0329	GC-MS	-	-	95	41	152.12	C10H16O	-	Camphor	樟脑	Terpenoids	萜类	-	-	76-22-2
WMW0023	GC-MS	-	-	93	92	136.125	C10H16	-	(+)-alpha-Pinene	（+）-α-P烯	Terpenoids	萜类	-	-	7785-70-8
XMW0008	GC-MS	-	-	82	138	138.104	C9H14O	-	Isophorone	异佛尔酮	Ketone	酮	-	-	78-59-1
KMW0560	GC-MS	-	-	146	118	146.037	C9H6O2	-	Coumarin	香豆素	Heterocyclic compound	杂环化合物	-	-	91-64-5
NMW0022	GC-MS	-	-	79	107	122.073	C8H10O	-	Benzenemethanol, .alpha.-methyl-	α-甲基-苯甲醇	Alcohol	醇	-	-	98-85-1
KMW0259	GC-MS	-	-	93	91	136.125	C10H16	-	.gamma.-Terpinene	γ-萜类品烯	Terpenoids	萜类	-	-	99-85-4
KMW0223	GC-MS	-	-	121	93	136.125	C10H16	-	1,3-Cyclohexadiene, 1-methyl-4-(1-methylethyl)-	α-萜类品烯	Terpenoids	萜类	-	-	99-86-5
KMW0234	GC-MS	-	-	119	134	134.11	C10H14	-	p-Cymene	对异丙基苯	Aromatics	芳烃	-	-	99-87-6
mws0001	UPLC-MS/MS	133.06	74	-	-	132.054	C4H8N2O3	[M+H]+	L-Asparagine	L-天冬酰胺	Amino acids and derivatives	氨基酸及其衍生物	Amino acids and derivatives	氨基酸及其衍生物	70-47-3
mws0014	UPLC-MS/MS	193.05	134.01	-	-	194.058	C10H10O4	[M-H]-	Ferulic acid	阿魏酸	Phenolic acids	酚酸类	Phenolic acids	酚酸类	537-98-4
mws0018	UPLC-MS/MS	203.22	83	-	-	202.216	C10H26N4	[M+H]+	Spermine	精胺	Alkaloids	生物碱	Phenolamine	酚胺	71-44-3
mws0027	UPLC-MS/MS	197.05	123	-	-	198.053	C9H10O5	[M-H]-	Syringic acid	丁香酸	Phenolic acids	酚酸类	Phenolic acids	酚酸类	530-57-4
mws0028	UPLC-MS/MS	167.03	108.02	-	-	168.042	C8H8O4	[M-H]-	Vanillic acid	香草酸	Phenolic acids	酚酸类	Phenolic acids	酚酸类	121-34-6
mws0045	UPLC-MS/MS	449.11	303.05	-	-	448.101	C21H20O11	[M+H]+	Quercetin-3-O-rhamnoside(Quercitrin)	槲皮素-3-O-鼠李糖苷(槲皮苷)	Flavonoids	黄酮	Flavonols	黄酮醇	522-12-3
mws0046	UPLC-MS/MS	579.17	271.06	-	-	580.179	C27H32O14	[M-H]-	Naringenin-7-O-Neohesperidoside(Naringin)	柚皮素-7-O-新橙皮糖苷(柚皮苷)	Flavonoids	黄酮	Flavanones	二氢黄酮	10236-47-2
mws0051	UPLC-MS/MS	285.08	270	-	-	284.068	C16H12O5	[M+H]+	Acacetin	金合欢素	Flavonoids	黄酮	Flavones	黄酮	480-44-4
mws0054	UPLC-MS/MS	289.07	245	-	-	290.079	C15H14O6	[M-H]-	Catechin	儿茶素	Flavonoids	黄酮	Flavanols	黄烷醇类	154-23-4
mws0061	UPLC-MS/MS	463.09	300	-	-	464.095	C21H20O12	[M-H]-	Quercetin-3-O-galactoside (Hyperin)	槲皮素-3-O-半乳糖苷 (金丝桃苷)	Flavonoids	黄酮	Flavonols	黄酮醇	482-36-0
mws0064	UPLC-MS/MS	287.06	135	-	-	288.063	C15H12O6	[M-H]-	Eriodictyol (5,7,3',4'-Tetrahydroxyflavanone)	圣草酚	Flavonoids	黄酮	Flavanones	二氢黄酮	552-58-9
mws0066	UPLC-MS/MS	315.05	151	-	-	316.058	C16H12O7	[M-H]-	Isorhamnetin	异鼠李素	Flavonoids	黄酮	Flavonols	黄酮醇	480-19-3
mws0071	UPLC-MS/MS	415.1	269.05	-	-	416.111	C21H20O9	[M-H]-	Apigenin-4'-O-rhamnoside	芹菜素-4'-O-鼠李糖苷	Flavonoids	黄酮	Flavones	黄酮	133538-77-9
mws0089	UPLC-MS/MS	447.09	285.04	-	-	448.101	C21H20O11	[M-H]-	Kaempferol-7-O-glucoside	山奈酚-7-O-葡萄糖苷	Flavonoids	黄酮	Flavonols	黄酮醇	16290-07-6
mws0091	UPLC-MS/MS	463.09	300.03	-	-	464.095	C21H20O12	[M-H]-	Quercetin-3-O-glucoside (Isoquercitrin)	槲皮素-3-O-葡萄糖苷(异槲皮苷)	Flavonoids	黄酮	Flavonols	黄酮醇	482-35-9
mws0092	UPLC-MS/MS	533.2	371	-	-	534.21	C27H34O11	[M-H]-	Arctiin	牛蒡子苷	Lignans and Coumarins	木脂素和香豆素	Lignans	木脂素	20362-31-6
mws0093	UPLC-MS/MS	179.07	146	-	-	180.079	C10H12O3	[M-H]-	Coniferyl alcohol	松柏醇	Phenolic acids	酚酸类	Phenolic acids	酚酸类	458-35-5
mws0097	UPLC-MS/MS	357.13	151	-	-	358.142	C20H22O6	[M-H]-	Pinoresinol	松脂醇	Lignans and Coumarins	木脂素和香豆素	Lignans	木脂素	487-36-5
mws0102	UPLC-MS/MS	160.04	116	-	-	161.048	C9H7NO2	[M-H]-	Indole-5-carboxylic acid	吲哚-5-甲酸	Alkaloids	生物碱	Plumerane	吲哚类生物碱	1670-81-1
mws0120	UPLC-MS/MS	258.11	104.11	-	-	257.103	C8H20NO6P	[M+H]+	Choline Alfoscerate	甘磷酸胆碱 GPC	Lipids	脂质	PC	磷脂酰胆碱	28319-77-9
mws0126	UPLC-MS/MS	524.37	184.07	-	-	523.364	C26H54NO7P	[M+H]+	LysoPC 18:0	溶血磷脂酰胆碱 18:0	Lipids	脂质	LPC	溶血磷脂酰胆碱	19420-57-6
mws0129	UPLC-MS/MS	285.08	270	-	-	284.068	C16H12O5	[M+H]+	Genkwanin (Apigenin 7-methyl ether)	芫花素 (5,4'-二羟基-7-甲氧基黄酮)	Flavonoids	黄酮	Flavones	黄酮	437-64-9
mws0133	UPLC-MS/MS	123.06	80.05	-	-	122.048	C6H6N2O	[M+H]+	Nicotinamide	烟酰胺	Others	其它类	Vitamin	维生素	98-92-0
mws0146	UPLC-MS/MS	138.06	78	-	-	137.048	C7H7NO2	[M+H]+	Nicotinic Acid Methyl Ester(Methyl Nicotinate)	烟酸甲酯	Alkaloids	生物碱	Alkaloids	生物碱	93-60-7
mws0147	UPLC-MS/MS	117.06	59	-	-	118.063	C5H10O3	[M-H]-	β-Hydroxyisovaleric acid	β-羟基异戊酸	Organic acids	有机酸	Organic acids	有机酸	625-08-1
mws0154	UPLC-MS/MS	173.05	93	-	-	174.053	C7H10O5	[M-H]-	Shikimic acid	莽草酸	Organic acids	有机酸	Organic acids	有机酸	138-59-0
mws0159	UPLC-MS/MS	163.04	91	-	-	164.047	C9H8O3	[M-H]-	Phenylpyruvic acid	苯丙酮酸	Organic acids	有机酸	Organic acids	有机酸	156-06-9
mws0178	UPLC-MS/MS	353.09	191.01	-	-	354.095	C16H18O9	[M-H]-	Chlorogenic acid (3-O-Caffeoylquinic acid)*	绿原酸 (3-O-咖啡酰奎宁酸)*	Phenolic acids	酚酸类	Phenolic acids	酚酸类	327-97-9
mws0180	UPLC-MS/MS	153.02	109.03	-	-	154.027	C7H6O4	[M-H]-	2,5-Dihydroxybenzoic acid; Gentisic Acid	2,5-二羟基苯甲酸; 龙胆酸	Phenolic acids	酚酸类	Phenolic acids	酚酸类	490-79-9
mws0183	UPLC-MS/MS	153.02	109.03	-	-	154.027	C7H6O4	[M-H]-	3,4-Dihydroxybenzoic acid (Protocatechuic acid)	3,4-二羟基苯甲酸; 原儿茶酸	Phenolic acids	酚酸类	Phenolic acids	酚酸类	99-50-3
mws0191	UPLC-MS/MS	118.09	59	-	-	117.079	C5H11NO2	[M+H]+	Betaine	甜菜碱	Alkaloids	生物碱	Alkaloids	生物碱	107-43-7
mws0192	UPLC-MS/MS	117.02	73	-	-	118.027	C4H6O4	[M-H]-	Succinic acid	琥珀酸	Organic acids	有机酸	Organic acids	有机酸	110-15-6
mws0193	UPLC-MS/MS	190.12	127	-	-	189.111	C7H15N3O3	[M+H]+	L-Homocitrulline	L-高瓜氨酸	Amino acids and derivatives	氨基酸及其衍生物	Amino acids and derivatives	氨基酸及其衍生物	1190-49-4
mws0208	UPLC-MS/MS	145.05	101	-	-	146.058	C6H10O4	[M-H]-	Adipic Acid	己二酸	Organic acids	有机酸	Organic acids	有机酸	124-04-9
mws0213	UPLC-MS/MS	151.06	71	-	-	152.068	C5H12O5	[M-H]-	Ribitol	阿东糖醇	Others	其它类	Saccharides and Alcohols	糖及醇类	488-81-3
mws0214	UPLC-MS/MS	181.07	71	-	-	182.079	C6H14O6	[M-H]-	D-Sorbitol	D-山梨糖醇	Others	其它类	Saccharides and Alcohols	糖及醇类	50-70-4
mws0216	UPLC-MS/MS	132.07	86	-	-	131.058	C5H9NO3	[M+H]+	Trans-4-Hydroxy-L-proline	反-4-羟基-L-脯氨酸	Amino acids and derivatives	氨基酸及其衍生物	Amino acids and derivatives	氨基酸及其衍生物	51-35-4
mws0219	UPLC-MS/MS	132.03	88	-	-	133.038	C4H7NO4	[M-H]-	L-Aspartic Acid	L-天冬氨酸	Amino acids and derivatives	氨基酸及其衍生物	Amino acids and derivatives	氨基酸及其衍生物	56-84-8
mws0221	UPLC-MS/MS	241.03	152	-	-	240.024	C6H12N2O4S2	[M+H]+	L-Cystine	L-胱氨酸	Amino acids and derivatives	氨基酸及其衍生物	Amino acids and derivatives	氨基酸及其衍生物	56-89-3
mws0227	UPLC-MS/MS	132.1	86.2	-	-	131.095	C6H13NO2	[M+H]+	L-Leucine	L-亮氨酸	Amino acids and derivatives	氨基酸及其衍生物	Amino acids and derivatives	氨基酸及其衍生物	61-90-5
mws0230	UPLC-MS/MS	120.07	74	-	-	119.058	C4H9NO3	[M+H]+	L-Threonine	L-苏氨酸	Amino acids and derivatives	氨基酸及其衍生物	Amino acids and derivatives	氨基酸及其衍生物	72-19-5
mws0232	UPLC-MS/MS	377.15	243	-	-	376.138	C17H20N4O6	[M+H]+	Riboflavin (Vitamin B2)	核黄素 (维生素 B2)	Others	其它类	Vitamin	维生素	83-88-5
mws0237	UPLC-MS/MS	187.1	125	-	-	188.105	C9H16O4	[M-H]-	Azelaic acid	壬二酸	Organic acids	有机酸	Organic acids	有机酸	123-99-9
mws0242	UPLC-MS/MS	173.08	111	-	-	174.089	C8H14O4	[M-H]-	Suberic Acid	辛二酸	Organic acids	有机酸	Organic acids	有机酸	505-48-6
mws0248	UPLC-MS/MS	243.06	110	-	-	244.07	C9H12N2O6	[M-H]-	Uridine	尿嘧啶核苷	Nucleotides and derivatives	核苷酸及其衍生物	Nucleotides and derivatives	核苷酸及其衍生物	58-96-8
mws0250	UPLC-MS/MS	182.08	136.1	-	-	181.074	C9H11NO3	[M+H]+	L-Tyrosine	L-酪氨酸	Amino acids and derivatives	氨基酸及其衍生物	Amino acids and derivatives	氨基酸及其衍生物	60-18-4
mws0254	UPLC-MS/MS	156.08	110	-	-	155.069	C6H9N3O2	[M+H]+	L-Histidine	L-组氨酸	Amino acids and derivatives	氨基酸及其衍生物	Amino acids and derivatives	氨基酸及其衍生物	71-00-1
mws0255	UPLC-MS/MS	112.05	95	-	-	111.043	C4H5N3O	[M+H]+	Cytosine	胞嘧啶	Nucleotides and derivatives	核苷酸及其衍生物	Nucleotides and derivatives	核苷酸及其衍生物	71-30-7
mws0256	UPLC-MS/MS	118.09	72.1	-	-	117.079	C5H11NO2	[M+H]+	L-Valine	L-缬氨酸	Amino acids and derivatives	氨基酸及其衍生物	Amino acids and derivatives	氨基酸及其衍生物	72-18-4
mws0258	UPLC-MS/MS	132.1	86	-	-	131.095	C6H13NO2	[M+H]+	L-Isoleucine	L-异亮氨酸	Amino acids and derivatives	氨基酸及其衍生物	Amino acids and derivatives	氨基酸及其衍生物	73-32-5
MWS0274	UPLC-MS/MS	165.06	119.05	-	-	166.063	C9H10O3	[M-H]-	DL-3-Phenyllactic acid	DL-3-苯基乳酸	Organic acids	有机酸	Organic acids	有机酸	828-01-3
mws0275	UPLC-MS/MS	133.01	71.01	-	-	134.022	C4H6O5	[M-H]-	L-Malic acid	L-苹果酸	Organic acids	有机酸	Organic acids	有机酸	97-67-6
mws0277	UPLC-MS/MS	191.06	85	-	-	192.063	C7H12O6	[M-H]-	Quinic Acid	奎宁酸	Organic acids	有机酸	Organic acids	有机酸	77-95-2
mws0281	UPLC-MS/MS	191.02	111.01	-	-	192.027	C6H8O7	[M-H]-	Citric Acid	柠檬酸	Organic acids	有机酸	Organic acids	有机酸	77-92-9
mws0282	UPLC-MS/MS	203.08	116.05	-	-	204.09	C11H12N2O2	[M-H]-	L-Tryptophan	L-色氨酸	Amino acids and derivatives	氨基酸及其衍生物	Amino acids and derivatives	氨基酸及其衍生物	73-22-3
mws0289	UPLC-MS/MS	480.31	339.29	-	-	479.301	C23H46NO7P	[M+H]+	LysoPE 18:1	溶血磷脂酰乙醇胺 18:1	Lipids	脂质	LPE	溶血磷脂酰乙醇胺	89576-29-4
mws0336	UPLC-MS/MS	137.04	93.05	-	-	138.043	C6H6N2O2	[M-H]-	Urocanic acid	尿刊酸	Organic acids	有机酸	Organic acids	有机酸	104-98-3
mws0341	UPLC-MS/MS	131.07	85	-	-	132.079	C6H12O3	[M-H]-	2-Hydroxyisocaproic acid	2-羟基异己酸	Organic acids	有机酸	Organic acids	有机酸	20312-37-2
mws0344	UPLC-MS/MS	165.04	75	-	-	166.048	C5H10O6	[M-H]-	D-Xylonic acid	D-木糖酸	Others	其它类	Saccharides and Alcohols	糖及醇类	526-91-0
mws0359	UPLC-MS/MS	241.22	241.22	-	-	242.225	C15H30O2	[M-H]-	Pentadecanoic Acid	十五烷酸	Lipids	脂质	Free fatty acids	游离脂肪酸	1002-84-2
mws0369	UPLC-MS/MS	303.23	258.9	-	-	304.24	C20H32O2	[M-H]-	Arachidonic Acid	花生四烯酸	Lipids	脂质	Free fatty acids	游离脂肪酸	506-32-1
mws0376	UPLC-MS/MS	115	71	-	-	116.011	C4H4O4	[M-H]-	Fumaric acid	延胡索酸(富马酸,反丁烯二酸)	Organic acids	有机酸	Organic acids	有机酸	110-17-8
mws0397	UPLC-MS/MS	301.22	257.23	-	-	302.225	C20H30O2	[M-H]-	Cis-5,8,11,14,17-Eicosapentaenoic Acid	二十碳五烯酸(顺-5,8,11,14,17)/EPA(C20:5)	Lipids	脂质	Free fatty acids	游离脂肪酸	10417-94-4
mws0425	UPLC-MS/MS	129.02	85	-	-	130.027	C5H6O4	[M-H]-	Citraconic acid	柠康酸	Organic acids	有机酸	Organic acids	有机酸	498-23-7
mws0437	UPLC-MS/MS	151.06	71	-	-	152.068	C5H12O5	[M-H]-	D-Arabitol	D-阿拉伯糖醇	Others	其它类	Saccharides and Alcohols	糖及醇类	488-82-4
mws0438	UPLC-MS/MS	151.06	59	-	-	152.068	C5H12O5	[M-H]-	L-Arabitol	L-阿拉伯糖醇	Others	其它类	Saccharides and Alcohols	糖及醇类	7643-75-6
mws0458	UPLC-MS/MS	151.04	136	-	-	152.047	C8H8O3	[M-H]-	Vanillin	香草醛	Phenolic acids	酚酸类	Phenolic acids	酚酸类	121-33-5
mws0463	UPLC-MS/MS	301.07	164	-	-	302.079	C16H14O6	[M-H]-	Hesperetin	橙皮素	Flavonoids	黄酮	Flavanones	二氢黄酮	520-33-2
mws0467	UPLC-MS/MS	165.06	119.05	-	-	166.063	C9H10O3	[M-H]-	3-(4-Hydroxyphenyl)-propionic acid	3-(4-羟基苯基)丙酸	Phenolic acids	酚酸类	Phenolic acids	酚酸类	501-97-3
mws0470	UPLC-MS/MS	117.02	73	-	-	118.027	C4H6O4	[M-H]-	Methylmalonic acid	甲基丙二酸	Organic acids	有机酸	Organic acids	有机酸	516-05-2
mws0473	UPLC-MS/MS	131.03	87.05	-	-	132.042	C5H8O4	[M-H]-	2-Methylsuccinic acid	2-甲基丁二酸	Organic acids	有机酸	Organic acids	有机酸	498-21-5
mws0491	UPLC-MS/MS	122.1	105	-	-	121.089	C8H11N	[M+H]+	Phenethylamine	2-苯乙胺	Alkaloids	生物碱	Alkaloids	生物碱	64-04-0
mws0520	UPLC-MS/MS	224.09	136	-	-	223.084	C11H13NO4	[M+H]+	N-Acetyl-L-tyrosine	N-乙酰-L-酪氨酸	Amino acids and derivatives	氨基酸及其衍生物	Amino acids and derivatives	氨基酸及其衍生物	537-55-3
MWS0552	UPLC-MS/MS	239.2	223.03	-	-	240.209	C15H28O2	[M-H]-	Cis-10-Pentadecenoic Acid(C15: 1)	顺-10-十五碳烯酸	Lipids	脂质	Free fatty acids	游离脂肪酸	84743-29-3
MWS0559	UPLC-MS/MS	161.05	71.01	-	-	162.053	C6H10O5	[M-H]-	1,6-anhydro-β-D-glucose	1,6-脱水-β-D-葡萄糖	Others	其它类	Saccharides and Alcohols	糖及醇类	498-07-7
mws0567	UPLC-MS/MS	146.09	87	-	-	145.085	C5H11N3O2	[M+H]+	4-Guanidinobutyric acid	4-胍基丁酸	Organic acids	有机酸	Organic acids	有机酸	463-00-3
mws0574	UPLC-MS/MS	103.04	57.03	-	-	104.047	C4H8O3	[M-H]-	2-Hydroxyisobutyric acid	2-羟基异丁酸	Organic acids	有机酸	Organic acids	有机酸	594-61-6
mws0576	UPLC-MS/MS	103.04	59.1	-	-	104.047	C4H8O3	[M-H]-	3-Hydroxybutyric acid	3-羟基丁酸	Organic acids	有机酸	Organic acids	有机酸	300-85-6
mws0582	UPLC-MS/MS	322.11	130	-	-	321.099	C11H19N3O6S	[M+H]+	S-(Methyl)glutathione	S-甲基谷胱甘肽	Amino acids and derivatives	氨基酸及其衍生物	Amino acids and derivatives	氨基酸及其衍生物	2922-56-7
mws0609	UPLC-MS/MS	344.04	150	-	-	345.047	C10H12N5O7P	[M-H]-	Guanosine 3',5'-cyclic monophosphate	鸟苷 3',5'-环单磷酸	Nucleotides and derivatives	核苷酸及其衍生物	Nucleotides and derivatives	核苷酸及其衍生物	7665-99-8
mws0628	UPLC-MS/MS	121.03	92	-	-	122.037	C7H6O2	[M-H]-	4-Hydroxybenzaldehyde	对羟基苯甲醛	Phenolic acids	酚酸类	Phenolic acids	酚酸类	123-08-0
mws0629	UPLC-MS/MS	281.11	166	-	-	280.106	C13H16N2O5	[M+H]+	L-Aspartyl-L-Phenylalanine	L-天冬氨酰-L-苯丙氨酸	Amino acids and derivatives	氨基酸及其衍生物	Amino acids and derivatives	氨基酸及其衍生物	13433-09-5
mws0639	UPLC-MS/MS	153.02	109.03	-	-	154.027	C7H6O4	[M-H]-	2,3-Dihydroxybenzoic Acid	2,3-二羟基苯甲酸	Organic acids	有机酸	Organic acids	有机酸	303-38-8
mws0668	UPLC-MS/MS	283.07	151	-	-	284.076	C10H12N4O6	[M-H]-	Xanthosine	黄苷	Nucleotides and derivatives	核苷酸及其衍生物	Nucleotides and derivatives	核苷酸及其衍生物	146-80-5
mws0671	UPLC-MS/MS	120.07	74.1	-	-	119.058	C4H9NO3	[M+H]+	L-Homoserine	L-高丝氨酸	Organic acids	有机酸	Organic acids	有机酸	672-15-1
mws0675	UPLC-MS/MS	335.06	123	-	-	334.057	C11H15N2O8P	[M+H]+	β-Nicotinamide mononucleotide	β-烟酰胺单核苷酸	Nucleotides and derivatives	核苷酸及其衍生物	Nucleotides and derivatives	核苷酸及其衍生物	1094-61-7
mws0677	UPLC-MS/MS	219.11	160	-	-	218.106	C12H14N2O2	[M+H]+	N-Acetyl-5-hydroxytryptamine	N-乙酰-5-羟基色胺	Alkaloids	生物碱	Plumerane	吲哚类生物碱	1210-83-9
mws0724	UPLC-MS/MS	298.08	208	-	-	299.087	C10H13N5O6	[M-H]-	8-Hydroxyguanosine	8-羟基鸟苷	Nucleotides and derivatives	核苷酸及其衍生物	Nucleotides and derivatives	核苷酸及其衍生物	3868-31-3
mws0736	UPLC-MS/MS	189.12	86	-	-	188.116	C8H16N2O3	[M+H]+	N-Glycyl-L-leucine	N-甘氨酰-L-亮氨酸	Amino acids and derivatives	氨基酸及其衍生物	Amino acids and derivatives	氨基酸及其衍生物	869-19-2
mws0749	UPLC-MS/MS	137.02	93	-	-	138.032	C7H6O3	[M-H]-	4-Hydroxybenzoic acid	4-羟基苯甲酸	Phenolic acids	酚酸类	Phenolic acids	酚酸类	99-96-7
mws0752	UPLC-MS/MS	185.15	185.16	-	-	186.162	C11H22O2	[M-H]-	Undecylic Acid	十一烷酸	Lipids	脂质	Free fatty acids	游离脂肪酸	112-37-8
mws0791	UPLC-MS/MS	593.19	285	-	-	594.195	C28H34O14	[M-H]-	Poncirin (Isosakuranetin-7-O-neohesperidoside)	枸橘苷	Flavonoids	黄酮	Flavanones	二氢黄酮	14941-08-3
MWS0811	UPLC-MS/MS	130.09	84.08	-	-	129.079	C6H11NO2	[M+H]+	L-Pipecolic Acid	L-哌啶酸	Organic acids	有机酸	Organic acids	有机酸	3105-95-1
mws0847	UPLC-MS/MS	150.08	133	-	-	149.07	C6H7N5	[M+H]+	1-Methyladenine	1-甲基腺嘌呤	Nucleotides and derivatives	核苷酸及其衍生物	Nucleotides and derivatives	核苷酸及其衍生物	5142-22-3
mws0851	UPLC-MS/MS	143.11	143.11	-	-	166.097	C8H15NaO2	[M-Na]-	Sodium Valproate	丙戊酸钠	Others	其它类	Others	其它	1069-66-5
mws0853	UPLC-MS/MS	209.08	179	-	-	210.089	C11H14O4	[M-H]-	Sinapyl alcohol	芥子醇	Phenolic acids	酚酸类	Phenolic acids	酚酸类	537-33-7
mws0863	UPLC-MS/MS	213.02	97	-	-	214.024	C5H11O7P	[M-H]-	2-Deoxyribose-5'-phosphate	2-脱氧核糖-5'-磷酸	Nucleotides and derivatives	核苷酸及其衍生物	Nucleotides and derivatives	核苷酸及其衍生物	102916-66-5
mws0866	UPLC-MS/MS	259.02	97	-	-	260.03	C6H13O9P	[M-H]-	D-Glucose 6-phosphate	D-葡萄糖-6-磷酸	Others	其它类	Saccharides and Alcohols	糖及醇类	56-73-5
mws0874	UPLC-MS/MS	346.06	210.9	-	-	347.063	C10H14N5O7P	[M-H]-	3'-Adenylic Acid	3'-腺嘌呤核苷酸	Nucleotides and derivatives	核苷酸及其衍生物	Nucleotides and derivatives	核苷酸及其衍生物	84-21-9
mws0884	UPLC-MS/MS	328.05	134.2	-	-	329.053	C10H12N5O6P	[M-H]-	Cyclic 3',5'-Adenylic acid	环-3',5'-腺嘌呤核苷酸	Nucleotides and derivatives	核苷酸及其衍生物	Nucleotides and derivatives	核苷酸及其衍生物	60-92-4
mws0889	UPLC-MS/MS	135.03	75.01	-	-	136.037	C4H8O5	[M-H]-	D-Threonic Acid	D-苏糖酸	Others	其它类	Saccharides and Alcohols	糖及醇类	3909-12-4
mws0913	UPLC-MS/MS	447.09	285	-	-	448.101	C21H20O11	[M-H]-	Kaempferol-3-O-galactoside (Trifolin)	山奈酚-3-O-半乳糖苷(三叶豆苷)	Flavonoids	黄酮	Flavonols	黄酮醇	23627-87-4
mws0914	UPLC-MS/MS	271.06	151	-	-	272.068	C15H12O5	[M-H]-	Pinobanksin	短叶松素	Flavonoids	黄酮	Flavanonols	二氢黄酮醇	548-82-3
mws0918	UPLC-MS/MS	283.06	268	-	-	284.068	C16H12O5	[M-H]-	Prunetin (5,4'-Dihydroxy-7-methoxyisoflavone)	樱黄素	Flavonoids	黄酮	Isoflavones	异黄酮	552-59-0
mws0919	UPLC-MS/MS	431.1	285	-	-	432.106	C21H20O10	[M-H]-	Kaempferol-3-O-rhamnoside (Afzelin)(Kaempferin)	山奈酚-3-O-鼠李糖苷 (阿福豆苷)(番泻叶山奈苷)	Flavonoids	黄酮	Flavonols	黄酮醇	482-39-3
mws0924	UPLC-MS/MS	145.05	101	-	-	146.058	C6H10O4	[M-H]-	2-Methylglutaric acid	2-甲基戊二酸	Organic acids	有机酸	Organic acids	有机酸	617-62-9
mws0943	UPLC-MS/MS	151.05	71.01	-	-	152.059	C7H8N2O2	[M-H]-	1,4-Dihydro-1-Methyl-4-oxo-3-pyridinecarboxamide	1,4-二氢-1-甲基-4-氧代-3-吡啶甲酰胺	Alkaloids	生物碱	Pyridine alkaloids	吡啶类生物碱	769-49-3
mws0976	UPLC-MS/MS	243.06	153	-	-	244.07	C9H12N2O6	[M-H]-	β-Pseudouridine	β-假尿苷	Nucleotides and derivatives	核苷酸及其衍生物	Nucleotides and derivatives	核苷酸及其衍生物	1445-07-4
mws0983	UPLC-MS/MS	326.31	62.06	-	-	325.298	C20H39NO2	[M+H]+	N-Oleoylethanolamine	油酰单乙醇胺	Alkaloids	生物碱	Alkaloids	生物碱	111-58-0
mws0984	UPLC-MS/MS	236.08	164.06	-	-	237.086	C9H11N5O3	[M-H]-	L-Sepiapterin	L-墨喋呤	Nucleotides and derivatives	核苷酸及其衍生物	Nucleotides and derivatives	核苷酸及其衍生物	17094-01-8
mws1013	UPLC-MS/MS	177.02	133.2	-	-	178.027	C9H6O4	[M-H]-	Esculetin	秦皮乙素	Lignans and Coumarins	木脂素和香豆素	Coumarins	香豆素	305-01-1
mws1015	UPLC-MS/MS	339.07	177	-	-	340.079	C15H16O9	[M-H]-	Esculin (6,7-DihydroxyCoumarin-6-glucoside)	秦皮甲素	Lignans and Coumarins	木脂素和香豆素	Coumarins	香豆素	531-75-9
mws1035	UPLC-MS/MS	741.22	433	-	-	740.216	C33H40O19	[M+H]+	Kaempferol-3-O-robinoside-7-O-rhamnoside (Robinin)	山奈酚-3-O-刺槐糖苷-7-O-鼠李糖苷 (刺槐苷)	Flavonoids	黄酮	Flavonols	黄酮醇	301-19-9
mws1038	UPLC-MS/MS	277.12	146	-	-	278.13	C11H22N2O4S	[M-H]-	Pantetheine	泛酰巯基乙胺	Others	其它类	Others	其它	496-65-1
mws1050	UPLC-MS/MS	148.06	88	-	-	147.053	C5H9NO4	[M+H]+	O-Acetylserine	O-乙酰丝氨酸	Amino acids and derivatives	氨基酸及其衍生物	Amino acids and derivatives	氨基酸及其衍生物	5147-00-2
mws1060	UPLC-MS/MS	267.07	135	-	-	268.081	C10H12N4O5	[M-H]-	9-(Arabinosyl)hypoxanthine	9-(阿拉伯糖基)次黄嘌呤	Nucleotides and derivatives	核苷酸及其衍生物	Nucleotides and derivatives	核苷酸及其衍生物	7013-16-3
mws1066	UPLC-MS/MS	579.17	271	-	-	580.179	C27H32O14	[M-H]-	Naringenin-7-O-Rutinoside(Narirutin)	柚皮素-7-O-芸香糖苷(芸香柚皮苷)	Flavonoids	黄酮	Flavanones	二氢黄酮	14259-46-2
mws1068	UPLC-MS/MS	285.04	151	-	-	286.048	C15H10O6	[M-H]-	Kaempferol (3,5,7,4'-Tetrahydroxyflavone)	山奈酚	Flavonoids	黄酮	Flavonols	黄酮醇	520-18-3
mws1073	UPLC-MS/MS	595.17	457.2	-	-	594.158	C27H30O15	[M+H]+	Apigenin-6,8-di-C-glucoside (Vicenin-2)	芹菜素-6,8-二-C-葡萄糖苷 (新西兰牡荆苷 II)	Flavonoids	黄酮	Flavonoid carbonoside	黄酮碳糖苷	23666-13-9
mws1076	UPLC-MS/MS	207.07	151	-	-	206.058	C11H10O4	[M+H]+	Scoparone	滨蒿内酯	Lignans and Coumarins	木脂素和香豆素	Coumarins	香豆素	120-08-1
mws1090	UPLC-MS/MS	259.02	97	-	-	260.03	C6H13O9P	[M-H]-	Glucose-1-phosphate	葡萄糖-1-磷酸	Others	其它类	Saccharides and Alcohols	糖及醇类	59-56-3
mws1094	UPLC-MS/MS	287.06	259	-	-	288.063	C15H12O6	[M-H]-	Aromadendrin (DihydroKaempferol)	香橙素 (二氢山奈酚)	Flavonoids	黄酮	Flavanonols	二氢黄酮醇	480-20-6
mws1138	UPLC-MS/MS	551.15	303.04	-	-	550.143	C24H26N2O13	[M+H]+	Betanin (Betanidin-5-O-glucoside)	甜菜红苷 (甜菜苷-5-O-葡萄糖苷)	Alkaloids	生物碱	Plumerane	吲哚类生物碱	7659-95-2
mws1150	UPLC-MS/MS	785.25	623.2	-	-	786.258	C35H46O20	[M-H]-	Echinacoside	松果菊苷	Phenolic acids	酚酸类	Phenolic acids	酚酸类	82854-37-3
mws1153	UPLC-MS/MS	665.21	161.02	-	-	666.216	C31H38O16	[M-H]-	2'-Acetylacteoside	2'-乙酰毛蕊花糖苷	Phenolic acids	酚酸类	Phenolic acids	酚酸类	94492-24-7
mws1155	UPLC-MS/MS	181.07	101.02	-	-	182.079	C6H14O6	[M-H]-	D-Mannitol	D-甘露醇	Others	其它类	Saccharides and Alcohols	糖及醇类	69-65-8
mws1164	UPLC-MS/MS	179.06	59.01	-	-	180.063	C6H12O6	[M-H]-	D-Fructose	D-果糖	Others	其它类	Saccharides and Alcohols	糖及醇类	57-48-7
mws1174	UPLC-MS/MS	313.07	253	-	-	314.079	C17H14O6	[M-H]-	3-O-Acetylpinobanksin	3-O-乙酰短叶松黄烷酮	Flavonoids	黄酮	Flavanonols	二氢黄酮醇	52117-69-8
mws1175	UPLC-MS/MS	271.1	167.04	-	-	270.089	C16H14O4	[M+H]+	Pinostrobin	球松素	Flavonoids	黄酮	Flavanones	二氢黄酮	480-37-5
mws1179	UPLC-MS/MS	433.11	271	-	-	434.121	C21H22O10	[M-H]-	Naringenin-7-O-glucoside (Prunin)	柚皮素-7-O-葡萄糖苷 (樱桃苷)	Flavonoids	黄酮	Flavanones	二氢黄酮	529-55-5
mws1189	UPLC-MS/MS	193.04	72.8	-	-	194.033	C6H10O7	[M-H]-	D-Galacturonic acid	D-半乳糖醛酸	Organic acids	有机酸	Organic acids	有机酸	685-73-4
mws1195	UPLC-MS/MS	179.07	147.1	-	-	178.063	C10H10O3	[M+H]+	p-coumaric acid methyl ester	对香豆酸甲酯	Phenolic acids	酚酸类	Phenolic acids	酚酸类	3943-97-3
mws1290	UPLC-MS/MS	593.13	285	-	-	594.137	C30H26O13	[M-H]-	Kaempferol-3-O-(6''-p-Coumaroyl)glucoside (Tiliroside)	山奈酚-3-O-(6''-对香豆酰)葡萄糖苷 (银锻苷)	Flavonoids	黄酮	Flavones	黄酮	20316-62-5
mws1297	UPLC-MS/MS	269.1	101.02	-	-	270.11	C13H18O6	[M-H]-	Benzyl glucoside	苄基葡萄糖苷	Phenolic acids	酚酸类	Phenolic acids	酚酸类	4304-12-5
mws1326	UPLC-MS/MS	301.04	211.4	-	-	302.043	C15H10O7	[M-H]-	Herbacetin	草质素	Flavonoids	黄酮	Flavonols	黄酮醇	527-95-7
mws1329	UPLC-MS/MS	463.09	301.03	-	-	464.095	C21H20O12	[M-H]-	Quercetin-7-O-glucoside	槲皮素-7-O-葡萄糖苷	Flavonoids	黄酮	Flavonols	黄酮醇	491-50-9
mws1333	UPLC-MS/MS	341.11	113	-	-	342.116	C12H22O11	[M-H]-	Melibiose	蜜二糖	Others	其它类	Saccharides and Alcohols	糖及醇类	585-99-9
mws1336	UPLC-MS/MS	138.06	120	-	-	137.048	C7H7NO2	[M+H]+	4-Aminobenzoic acid	对氨基苯甲酸	Phenolic acids	酚酸类	Phenolic acids	酚酸类	150-13-0
mws1346	UPLC-MS/MS	162.08	98	-	-	161.069	C6H11NO4	[M+H]+	DL-2-Aminoadipic acid	DL-2-氨基己二酸	Alkaloids	生物碱	Alkaloids	生物碱	542-32-5
mws1350	UPLC-MS/MS	181.05	151	-	-	182.058	C9H10O4	[M-H]-	Syringaldehyde; 4-Hydroxy-3,5-Dimethoxybenzaldehyde	丁香醛; 4-羟基-3,5-二甲氧基苯甲醛	Phenolic acids	酚酸类	Phenolic acids	酚酸类	134-96-3
mws1361	UPLC-MS/MS	449.11	151	-	-	450.116	C21H22O11	[M-H]-	Taxifolin-3-O-rhamnoside (Astilbin)	花旗松素-3-O-葡萄糖苷(落新妇苷)	Flavonoids	黄酮	Flavanonols	二氢黄酮醇	29838-67-3
mws1401	UPLC-MS/MS	175.11	84	-	-	174.1	C7H14N2O3	[M+H]+	L-Theanine	L-茶氨酸	Amino acids and derivatives	氨基酸及其衍生物	Amino acids and derivatives	氨基酸及其衍生物	3081-61-6
mws1417	UPLC-MS/MS	160.04	116	-	-	161.048	C9H7NO2	[M-H]-	Indole-3-carboxylic acid	吲哚-3-甲酸	Alkaloids	生物碱	Plumerane	吲哚类生物碱	771-50-6
mws1454	UPLC-MS/MS	477.14	315	-	-	478.148	C23H26O11	[M-H]-	Persicoside	桃苷	Flavonoids	黄酮	Flavanones	二氢黄酮	28978-03-2
mws1474	UPLC-MS/MS	345.1	284	-	-	344.09	C18H16O7	[M+H]+	5,7-Dihydroxy-3',4',5'-trimethoxyflavone	5,7-二羟基-3',4',5'-三甲氧基黄酮	Flavonoids	黄酮	Flavones	黄酮	18103-42-9
mws1488	UPLC-MS/MS	255.23	237.22	-	-	256.24	C16H32O2	[M-H]-	Palmitic acid	棕榈酸	Lipids	脂质	Free fatty acids	游离脂肪酸	57-10-3
mws1489	UPLC-MS/MS	283.26	283.26	-	-	284.272	C18H36O2	[M-H]-	Stearic Acid	硬脂酸(十八烷酸)	Lipids	脂质	Free fatty acids	游离脂肪酸	57-11-4
mws1491	UPLC-MS/MS	279.23	279.23	-	-	280.24	C18H32O2	[M-H]-	Linoleic acid	亚油酸	Lipids	脂质	Free fatty acids	游离脂肪酸	60-33-3
mws1499	UPLC-MS/MS	149.05	59.01	-	-	150.053	C5H10O5	[M-H]-	D-Arabinose	D-阿拉伯糖	Others	其它类	Saccharides and Alcohols	糖及醇类	10323-20-3
mws1505	UPLC-MS/MS	283.1	135	-	-	284.105	C17H16O4	[M-H]-	Phenethyl caffeate	咖啡酸苯乙酯	Phenolic acids	酚酸类	Phenolic acids	酚酸类	104594-70-9
mws1512	UPLC-MS/MS	211.06	124	-	-	212.068	C10H12O5	[M-H]-	Propyl gallate	没食子酸丙酯(PG)	Phenolic acids	酚酸类	Phenolic acids	酚酸类	121-79-9
mws1574	UPLC-MS/MS	373.11	123	-	-	374.121	C16H22O10	[M-H]-	Geniposidic acid	京尼平苷酸	Terpenoids	萜类	Monoterpenoids	倍萜	27741-01-1
mws1587	UPLC-MS/MS	132.1	86	-	-	131.095	C6H13NO2	[M+H]+	L-Norleucine	L-正亮氨酸	Amino acids and derivatives	氨基酸及其衍生物	Amino acids and derivatives	氨基酸及其衍生物	327-57-1
mws1589	UPLC-MS/MS	503.16	179	-	-	504.169	C18H32O16	[M-H]-	D-Panose	D-潘糖	Others	其它类	Saccharides and Alcohols	糖及醇类	33401-87-5
mws1629	UPLC-MS/MS	345.12	183.2	-	-	346.126	C15H22O9	[M-H]-	Aucubin	桃叶珊瑚苷	Terpenoids	萜类	Sesquiterpenoids	倍半萜	479-98-1
mws1639	UPLC-MS/MS	223.06	190	-	-	222.053	C11H10O5	[M+H]+	Isofraxidin	异嗪皮啶	Lignans and Coumarins	木脂素和香豆素	Coumarins	香豆素	486-21-5
mws1642	UPLC-MS/MS	533.2	371	-	-	534.21	C27H34O11	[M-H]-	Phillyrin	连翘苷	Lignans and Coumarins	木脂素和香豆素	Lignans	木脂素	487-41-2
MWS1709	UPLC-MS/MS	133.01	71.01	-	-	134.022	C4H6O5	[M-H]-	D-Malic acid	D-苹果酸	Organic acids	有机酸	Organic acids	有机酸	636-61-3
mws1714	UPLC-MS/MS	473.07	149.01	-	-	474.08	C22H18O12	[M-H]-	Chicoric Acid	菊苣酸	Phenolic acids	酚酸类	Phenolic acids	酚酸类	70831-56-0
MWS1882	UPLC-MS/MS	132.03	88.04	-	-	133.038	C4H7NO4	[M-H]-	Iminodiacetic acid	亚氨基二乙酸	Organic acids	有机酸	Organic acids	有机酸	142-73-4
MWS1926	UPLC-MS/MS	132.1	86.1	-	-	131.095	C6H13NO2	[M+H]+	DL-Leucine	DL-亮氨酸	Amino acids and derivatives	氨基酸及其衍生物	Amino acids and derivatives	氨基酸及其衍生物	328-39-2
MWS1962	UPLC-MS/MS	153.13	83.05	-	-	152.12	C10H16O	[M+H]+	cis-Citral	柠檬醛	Others	其它类	Others	其它	5392-40-5
MWS20145	UPLC-MS/MS	451.12	289.07	-	-	450.116	C21H22O11	[M+H]+	Eriodictyol-7-O-glucoside	圣草酚-7-O-葡萄糖苷	Flavonoids	黄酮	Flavanones	二氢黄酮	38965-51-4
MWS20150	UPLC-MS/MS	449.11	287.07	-	-	448.101	C21H20O11	[M+H]+	Luteolin-7-O-glucoside (Cynaroside)	木犀草素-7-O-葡萄糖苷 (木犀草苷)	Flavonoids	黄酮	Flavones	黄酮	5373-11-5
MWS20152	UPLC-MS/MS	417.16	402.1	-	-	418.163	C22H26O8	[M-H]-	Syringaresinol	丁香树脂酚	Lignans and Coumarins	木脂素和香豆素	Lignans	木脂素	21453-71-4
MWS20159	UPLC-MS/MS	271.12	91.05	-	-	270.11	C13H18O6	[M+H]+	Phenyl-β-D-glucopyranoside	苄基 β-D-吡喃葡萄糖苷	Others	其它类	Others	其它	-
MWS20189	UPLC-MS/MS	301.07	286.05	-	-	300.063	C16H12O6	[M+H]+	Tectorigenin	鸢尾黄素	Flavonoids	黄酮	Isoflavones	异黄酮	548-77-6
MWS2027	UPLC-MS/MS	129.03	69	-	-	128.022	C4H4N2O3	[M+H]+	Barbituric acid;Malonylurea;2,4,6-Pyrimidinetrione	巴比妥酸;丙二酰脲;2,4,6-嘧啶三酮	Nucleotides and derivatives	核苷酸及其衍生物	Nucleotides and derivatives	核苷酸及其衍生物	67-52-7
MWS2070	UPLC-MS/MS	179.07	92.03	-	-	180.079	C10H12O3	[M-H]-	Propyl 4-hydroxybenzoate	4-羟基苯甲酸丙酯	Phenolic acids	酚酸类	Phenolic acids	酚酸类	94-13-3
MWS2076	UPLC-MS/MS	110.06	65.04	-	-	109.053	C6H7NO	[M+H]+	2-Aminophenol	2-氨基苯酚	Alkaloids	生物碱	Alkaloids	生物碱	95-55-6
mws2104	UPLC-MS/MS	193.07	99.01	-	-	194.079	C7H14O6	[M-H]-	D-Pinitol	D-松醇	Others	其它类	Saccharides and Alcohols	糖及醇类	10284-63-6
mws2108	UPLC-MS/MS	353.09	191.05	-	-	354.095	C16H18O9	[M-H]-	Cryptochlorogenic acid (4-O-Caffeoylquinic acid)*	隐绿原酸 (4-O-咖啡酰奎宁酸)*	Phenolic acids	酚酸类	Phenolic acids	酚酸类	905-99-7
mws2125	UPLC-MS/MS	166.98	78.7	-	-	167.982	C3H5O6P	[M-H]-	Phosphoenolpyruvate	磷酸烯醇式丙酮酸	Organic acids	有机酸	Organic acids	有机酸	138-08-9
mws2184	UPLC-MS/MS	207.07	135.1	-	-	208.074	C11H12O4	[M-H]-	Ethyl caffeate	咖啡酸乙酯	Phenolic acids	酚酸类	Phenolic acids	酚酸类	102-37-4
mws2186	UPLC-MS/MS	435.09	303	-	-	434.085	C20H18O11	[M+H]+	Avicularin(Quercetin-3-O-α-L-arabinofuranoside)	扁蓄苷(广寄生苷)	Flavonoids	黄酮	Flavonols	黄酮醇	572-30-5
mws2187	UPLC-MS/MS	811.48	649.4	-	-	812.492	C43H72O14	[M-H]-	Saikosaponin B4	柴胡皂苷 B4	Terpenoids	萜类	Triterpene Saponin	三萜皂苷	58558-09-1
mws2188	UPLC-MS/MS	779.46	617.4	-	-	780.466	C42H68O13	[M-H]-	Saikosaponin A	柴胡皂苷 A	Terpenoids	萜类	Triterpene	三萜	20736-09-8
mws2190	UPLC-MS/MS	779.46	617.3	-	-	780.466	C42H68O13	[M-H]-	Saikosaponin D	柴胡皂苷 D	Terpenoids	萜类	Triterpene	三萜	20874-52-6
mws2191	UPLC-MS/MS	779.46	617.4	-	-	780.466	C42H68O13	[M-H]-	Saikosaponin G	柴胡皂苷 G	Terpenoids	萜类	Triterpene Saponin	三萜皂苷	99365-19-2
mws2194	UPLC-MS/MS	811.48	649.4	-	-	812.492	C43H72O14	[M-H]-	Saikosaponin B3	柴胡皂苷 B3	Terpenoids	萜类	Triterpene	三萜	58316-42-0
mws2212	UPLC-MS/MS	179.03	135.05	-	-	180.042	C9H8O4	[M-H]-	Caffeic acid	咖啡酸	Phenolic acids	酚酸类	Phenolic acids	酚酸类	331-39-5
mws2213	UPLC-MS/MS	147.05	77.01	-	-	148.052	C9H8O2	[M-H]-	Cinnamic acid	肉桂酸	Phenolic acids	酚酸类	Phenolic acids	酚酸类	140-10-3
mws2367	UPLC-MS/MS	299.11	119	-	-	300.121	C14H20O7	[M-H]-	Salidroside	红景天苷	Phenolic acids	酚酸类	Phenolic acids	酚酸类	10338-51-9
mws2368	UPLC-MS/MS	137.06	119.05	-	-	138.068	C8H10O2	[M-H]-	Tyrosol	酪醇	Phenolic acids	酚酸类	Phenolic acids	酚酸类	501-94-0
MWS2430	UPLC-MS/MS	241.22	241.21	-	-	242.225	C15H30O2	[M-H]-	13-methylmyristic acid	13-甲基十四烷酸	Lipids	脂质	Free fatty acids	游离脂肪酸	2485-71-4
mws2523	UPLC-MS/MS	421.08	241.1	-	-	422.083	C12H23O14P	[M-H]-	Trehalose 6-phosphate	海藻糖-6-磷酸	Others	其它类	Saccharides and Alcohols	糖及醇类	4484-88-2
mws2608	UPLC-MS/MS	222.1	84.05	-	-	221.09	C8H15NO6	[M+H]+	N-Acetyl-D-galactosamine	N-乙酰-D-半乳糖胺	Others	其它类	Saccharides and Alcohols	糖及醇类	1811-31-0
mws2623	UPLC-MS/MS	281.25	281.25	-	-	282.256	C18H34O2	[M-H]-	11-Octadecanoic acid(Vaccenic acid)	11-十八碳烯酸	Lipids	脂质	Free fatty acids	游离脂肪酸	506-17-2
mws2627	UPLC-MS/MS	317.07	285.04	-	-	316.058	C16H12O7	[M+H]+	Tamarixetin (3,3',5,7-Tetrahydroxy-4'-Methoxyflavone)	柽柳黄素	Flavonoids	黄酮	Flavonols	黄酮醇	603-61-2
MWS2984	UPLC-MS/MS	153.05	136.03	-	-	152.045	C4H4N6O	[M+H]+	8-Azaguanine	8-氮鸟嘌呤	Nucleotides and derivatives	核苷酸及其衍生物	Nucleotides and derivatives	核苷酸及其衍生物	134-58-7
MWS3036	UPLC-MS/MS	147.03	85.03	-	-	148.037	C5H8O5	[M-H]-	3-Hydroxyglutaric acid	3-羟基戊二酸	Organic acids	有机酸	Organic acids	有机酸	638-18-6
MWS3270	UPLC-MS/MS	166.02	79.96	-	-	167.022	C7H5NO4	[M-H]-	quinolinic Acid	喹啉酸	Alkaloids	生物碱	Alkaloids	生物碱	89-00-9
mws4052	UPLC-MS/MS	102.06	56.05	-	-	101.048	C4H7NO2	[M+H]+	1-Aminocyclopropane-1-carboxylic acid	1-氨基环丙烷-1-羧酸	Organic acids	有机酸	Organic acids	有机酸	22059-21-8
mws4053	UPLC-MS/MS	455.35	455.35	-	-	456.36	C30H48O3	[M-H]-	Ursolic acid	熊果酸	Terpenoids	萜类	Triterpene	三萜	77-52-1
mws4134	UPLC-MS/MS	611.14	306.08	-	-	612.152	C20H32N6O12S2	[M-H]-	Oxiglutatione	氧化谷胱甘肽	Amino acids and derivatives	氨基酸及其衍生物	Amino acids and derivatives	氨基酸及其衍生物	27025-41-8
mws4160	UPLC-MS/MS	285.08	270.07	-	-	284.068	C16H12O5	[M+H]+	Wogonin (5,7-Dihydroxy-8-Methoxyflavone)	汉黄芩素 (5,7-二羟基-8-甲氧基黄酮)	Flavonoids	黄酮	Flavones	黄酮	632-85-9
mws4167	UPLC-MS/MS	463.09	287.06	-	-	462.08	C21H18O12	[M+H]+	Luteolin-7-O-glucuronide	木犀草素-7-O-葡萄糖醛酸苷	Flavonoids	黄酮	Flavones	黄酮	29741-10-4
mws4170	UPLC-MS/MS	179.06	59.01	-	-	180.063	C6H12O6	[M-H]-	D-Glucose	D-葡萄糖	Others	其它类	Saccharides and Alcohols	糖及醇类	50-99-7
mws4173	UPLC-MS/MS	207.07	192.04	-	-	206.058	C11H10O4	[M+H]+	5,7-Dimethoxycoumarin (Limettin)(Citropten)	5,7-二甲氧基香豆素 (柠檬内酯)(柠檬油素)	Lignans and Coumarins	木脂素和香豆素	Coumarins	香豆素	487-06-9
mws4174	UPLC-MS/MS	222.1	138	-	-	221.09	C8H15NO6	[M+H]+	N-Acetyl-D-mannosamine	N-乙酰-D-甘露糖胺	Others	其它类	Saccharides and Alcohols	糖及醇类	7772-94-3
mws4175	UPLC-MS/MS	175.02	85.03	-	-	176.032	C6H8O6	[M-H]-	D-Glucurono-6,3-lactone	D-葡萄糖醛酸-6,3-内酯	Others	其它类	Saccharides and Alcohols	糖及醇类	32449-92-6
mws4176	UPLC-MS/MS	237.12	120.09	-	-	236.116	C12H16N2O3	[M+H]+	L-Alanyl-L-Phenylalanine	L-丙氨酰-L-苯丙氨酸	Amino acids and derivatives	氨基酸及其衍生物	Amino acids and derivatives	氨基酸及其衍生物	3061-90-3
mws4183	UPLC-MS/MS	433.08	300.03	-	-	434.085	C20H18O11	[M-H]-	Quercetin-3-O-arabinoside (Guaijaverin)	槲皮素-3-O-阿拉伯糖苷(番石榴苷)	Flavonoids	黄酮	Flavonols	黄酮醇	22255-13-6
MWS4295	UPLC-MS/MS	299.26	253.25	-	-	300.266	C18H36O3	[M-H]-	DL-2-hydroxystearic acid	DL-2-羟基硬脂酸	Lipids	脂质	Free fatty acids	游离脂肪酸	629-22-1
MWS4296	UPLC-MS/MS	223.11	120.08	-	-	222.1	C11H14N2O3	[M+H]+	Glycylphenylalanine	甘氨酰苯基丙氨酸	Amino acids and derivatives	氨基酸及其衍生物	Amino acids and derivatives	氨基酸及其衍生物	3321-03-7
MWS4354	UPLC-MS/MS	282.12	150.08	-	-	281.112	C11H15N5O4	[M+H]+	N6-methyladenosine	N6-甲基腺苷	Nucleotides and derivatives	核苷酸及其衍生物	Nucleotides and derivatives	核苷酸及其衍生物	1867-73-8
mws5035	UPLC-MS/MS	279.17	120.08	-	-	278.163	C15H22N2O3	[M+H]+	L-Leucyl-L-phenylalanine	L-亮氨酰-L-苯丙氨酸	Amino acids and derivatives	氨基酸及其衍生物	Amino acids and derivatives	氨基酸及其衍生物	56217-82-4
mws5038	UPLC-MS/MS	341.11	89.02	-	-	342.116	C12H22O11	[M-H]-	Isomaltulose	异麦芽酮糖	Others	其它类	Saccharides and Alcohols	糖及醇类	13718-94-0
mws5041	UPLC-MS/MS	189.12	86.1	-	-	188.116	C8H16N2O3	[M+H]+	L-Glycyl-L-isoleucine	L-甘氨酰-L-异亮氨酸	Amino acids and derivatives	氨基酸及其衍生物	Amino acids and derivatives	氨基酸及其衍生物	19461-38-2
mws5042	UPLC-MS/MS	223.11	120.09	-	-	222.1	C11H14N2O3	[M+H]+	L-Glycyl-L-phenylalanine	L-甘氨酰-L-苯丙氨酸	Amino acids and derivatives	氨基酸及其衍生物	Amino acids and derivatives	氨基酸及其衍生物	721-66-4
MWS5083	UPLC-MS/MS	455.1	96.97	-	-	456.105	C17H21N4O9P	[M-H]-	Flavin Single Nucleotide(FMN)	黄素单核苷酸(FMN)	Nucleotides and derivatives	核苷酸及其衍生物	Nucleotides and derivatives	核苷酸及其衍生物	6184-17-4
MWS5173	UPLC-MS/MS	112.05	70.03	-	-	111.043	C4H5N3O	[M+H]+	Isocytosine	异胞嘧啶	Nucleotides and derivatives	核苷酸及其衍生物	Nucleotides and derivatives	核苷酸及其衍生物	108-53-2
MWS5235	UPLC-MS/MS	299.26	253.25	-	-	300.266	C18H36O3	[M-H]-	12-Hydroxyoctadecanoic acid	12-羟基硬脂酸	Lipids	脂质	Free fatty acids	游离脂肪酸	106-14-9
MWS80006	UPLC-MS/MS	311.22	293.21	-	-	312.23	C18H32O4	[M-H]-	9-Hydroperoxy-9Z,11E-Octadecadienoic Acid	9-过氧化羟基-9Z,11E-十八碳二烯酸	Lipids	脂质	Free fatty acids	游离脂肪酸	-
MWSCX014	UPLC-MS/MS	193.05	133.03	-	-	192.042	C10H8O4	[M+H]+	Scopoletin (7-Hydroxy-6-methoxycoumarin)	东莨菪内酯	Lignans and Coumarins	木脂素和香豆素	Coumarins	香豆素	92-61-5
MWSCX015	UPLC-MS/MS	165.05	91.05	-	-	164.047	C9H8O3	[M+H]+	(E)-3-(3,4-dihydroxyphenyl)acrylaldehyde	咖啡醛	Others	其它类	Others	其它	-
MWSHY0008	UPLC-MS/MS	433.11	283.06	-	-	432.106	C21H20O10	[M+H]+	Isovitexin	异维新	Flavonoids	黄酮	Flavones	黄酮	38953-85-4
MWSHY0009	UPLC-MS/MS	301.07	286.05	-	-	300.063	C16H12O6	[M+H]+	Diosmetin (5,7,3'-Trihydroxy-4'-methoxyflavone)	香叶木素	Flavonoids	黄酮	Flavones	黄酮	520-34-3
MWSHY0035	UPLC-MS/MS	463.09	287.06	-	-	462.08	C21H18O12	[M+H]+	Scutellarein-7-O-glucuronide (Scutellarin)	野黄芩素-7-O-葡萄糖醛酸苷 (野黄芩苷)	Flavonoids	黄酮	Flavones	黄酮	27740-01-8
MWSHY0061	UPLC-MS/MS	595.16	287.06	-	-	594.158	C27H30O15	[M+H]+	Kaempferol-3-O-neohesperidoside	山奈酚-3-O-新橙皮糖苷	Flavonoids	黄酮	Flavonols	黄酮醇	32602-81-6
MWSHY0080	UPLC-MS/MS	595.17	287.06	-	-	594.158	C27H30O15	[M+H]+	Luteolin-7-O-neohesperidoside (Lonicerin)	木犀草素-7-O-新橘皮糖苷 (忍冬苷)	Flavonoids	黄酮	Flavones	黄酮	25694-72-8
MWSHY0095	UPLC-MS/MS	331.08	271.06	-	-	330.074	C17H14O7	[M+H]+	Tricin (5,7,4'-Trihydroxy-3',5'-dimethoxyflavone)	苜蓿素(麦黄酮)	Flavonoids	黄酮	Flavones	黄酮	520-32-1
MWSHY0122	UPLC-MS/MS	771.23	317.07	-	-	770.227	C34H42O20	[M+H]+	Typhaneoside	香蒲新苷	Flavonoids	黄酮	Flavones	黄酮	104472-68-6
MWSHY0135	UPLC-MS/MS	625.18	317.08	-	-	624.169	C28H32O16	[M+H]+	Isorhamnetin-3-O-rutinoside (Narcissin)	异鼠李素-3-O-芸香糖苷 (水仙苷)	Flavonoids	黄酮	Flavones	黄酮	604-80-8
MWSHY0136	UPLC-MS/MS	449.11	287.06	-	-	448.101	C21H20O11	[M+H]+	Kaempferol-3-O-glucoside (Astragalin)	山奈酚-3-O-葡萄糖苷(紫云英苷)	Flavonoids	黄酮	Flavonols	黄酮醇	480-10-4
MWSHY0181	UPLC-MS/MS	433.11	313.07	-	-	432.106	C21H20O10	[M+H]+	Apigenin-8-C-Glucoside (Vitexin)	芹菜素-8-C-葡萄糖苷 (牡荆素)	Flavonoids	黄酮	Flavones	黄酮	3681-93-4
MWSHY0201	UPLC-MS/MS	579.17	287.06	-	-	578.164	C27H30O14	[M+H]+	Kaempferol-3,7-O-dirhamnoside (Kaempferitrin)	山奈酚-3,7-O-二鼠李糖苷 (山奈苷)	Flavonoids	黄酮	Flavonols	黄酮醇	482-38-2
MWSHY0202	UPLC-MS/MS	237.09	135.05	-	-	236.084	C16H12O2	[M+H]+	6-Methylflavone	6-甲基黄酮	Flavonoids	黄酮	Flavones	黄酮	29976-75-8
MWSmce024	UPLC-MS/MS	355.1	193.05	-	-	354.095	C16H18O9	[M+H]+	Scopoletin-7-O-glucoside (Scopolin)	东莨菪内酯-7-O-葡萄糖苷 (东莨菪苷)	Lignans and Coumarins	木脂素和香豆素	Coumarins	香豆素	531-44-2
MWSmce025	UPLC-MS/MS	369.09	207.03	-	-	370.09	C16H18O10	[M-H]-	Fraxetin-8-O-glucoside (Fraxin)	秦皮苷	Lignans and Coumarins	木脂素和香豆素	Coumarins	香豆素	524-30-1
MWSmce040	UPLC-MS/MS	153.05	65.04	-	-	152.047	C8H8O3	[M+H]+	Isovanillin	异香草醛	Phenolic acids	酚酸类	Phenolic acids	酚酸类	621-59-0
MWSmce119	UPLC-MS/MS	175.11	70.06	-	-	174.112	C6H14N4O2	[M+H]+	L-Arginine	L-精氨酸	Amino acids and derivatives	氨基酸及其衍生物	Amino acids and derivatives	氨基酸及其衍生物	74-79-3
MWSmce165	UPLC-MS/MS	165.08	59.02	-	-	166.084	C6H14O5	[M-H]-	L-Fucitol	L-岩藻糖醇	Others	其它类	Saccharides and Alcohols	糖及醇类	13074-06-1
MWSmce199	UPLC-MS/MS	149.05	59.02	-	-	150.053	C5H10O5	[M-H]-	L-Xylose	L-木糖	Others	其它类	Saccharides and Alcohols	糖及醇类	609-06-3
MWSmce232	UPLC-MS/MS	337.06	163.04	-	-	336.063	C19H12O6	[M+H]+	Dicumarol	双香豆素	Lignans and Coumarins	木脂素和香豆素	Coumarins	香豆素	66-76-2
MWSmce257	UPLC-MS/MS	218.11	88.04	-	-	219.111	C9H17NO5	[M-H]-	D-Pantothenic Acid	D-泛酸(维生素B5)	Others	其它类	Vitamin	维生素	79-83-4
MWSmce295	UPLC-MS/MS	245.07	113.03	-	-	244.07	C9H12N2O6	[M+H]+	1-beta-D-Arabinofuranosyluracil	1-β-D-阿糖呋喃脲嘧啶	Nucleotides and derivatives	核苷酸及其衍生物	Nucleotides and derivatives	核苷酸及其衍生物	3083-77-0
MWSmce310	UPLC-MS/MS	339.15	203.03	-	-	338.152	C21H22O4	[M+H]+	Bergamottin	佛手柑素	Lignans and Coumarins	木脂素和香豆素	Coumarins	香豆素	7380-40-7
MWSmce328	UPLC-MS/MS	517.13	163.04	-	-	516.127	C25H24O12	[M+H]+	Isochlorogenic acid C	异绿原酸 C	Phenolic acids	酚酸类	Phenolic acids	酚酸类	57378-72-0
MWSmce333	UPLC-MS/MS	284.1	152.06	-	-	283.092	C10H13N5O5	[M+H]+	Crotonoside; 2-Hydroxyadenosine	巴豆苷; 2-羟基腺苷	Nucleotides and derivatives	核苷酸及其衍生物	Nucleotides and derivatives	核苷酸及其衍生物	1818-71-9
MWSmce341	UPLC-MS/MS	279.16	149.03	-	-	278.152	C16H22O4	[M+H]+	Butyl isobutyl phthalate	邻苯二甲酸-1-丁酯-2-异丁酯	Others	其它类	Others	其它	17851-53-5
MWSmce346	UPLC-MS/MS	517.13	163.04	-	-	516.127	C25H24O12	[M+H]+	1,3-O-Dicaffeoylquinic Acid (Cynarin)	1,3-O-双咖啡酰奎宁酸(洋蓟酸)	Phenolic acids	酚酸类	Phenolic acids	酚酸类	30964-13-7
MWSmce355	UPLC-MS/MS	211.06	181.01	-	-	212.068	C10H12O5	[M-H]-	Methyl Syringate	丁香酸甲酯	Phenolic acids	酚酸类	Phenolic acids	酚酸类	884-35-5
MWSmce455	UPLC-MS/MS	181.05	107.01	-	-	182.058	C9H10O4	[M-H]-	Vanillic acid methyl ester	香草酸甲酯	Phenolic acids	酚酸类	Phenolic acids	酚酸类	3943-74-6
MWSmce560	UPLC-MS/MS	471.35	441.33	-	-	472.355	C30H48O4	[M-H]-	23-Hydroxybetulinic acid	23-羟基白桦脂酸	Terpenoids	萜类	Triterpene	三萜	85999-40-2
MWSmce632	UPLC-MS/MS	195.06	93.03	-	-	194.058	C10H10O4	[M+H]+	Vanillin acetate	香兰素乙酸酯	Others	其它类	Others	其它	881-68-5
MWSmce658	UPLC-MS/MS	193.05	153.02	-	-	192.042	C10H8O4	[M+H]+	Noreugenin; 5,7-Dihydroxy-2-Methylchromone	去甲丁香色原酮; 5,7-二羟基-2-甲基色酮	Phenolic acids	酚酸类	Phenolic acids	酚酸类	1013-69-0
MWSmce674	UPLC-MS/MS	451.36	89.06	-	-	450.35	C31H46O2	[M+H]+	Phylloquinone (Vitamin K1)	叶绿醌 (维生素K1)	Others	其它类	Vitamin	维生素	84-80-0
MWSmce675	UPLC-MS/MS	271.08	108.02	-	-	272.09	C12H16O7	[M-H]-	Arbutin	熊果苷	Phenolic acids	酚酸类	Phenolic acids	酚酸类	497-76-7
MWSmce682	UPLC-MS/MS	149.05	59.01	-	-	150.053	C5H10O5	[M-H]-	DL-Xylose	DL-木糖	Others	其它类	Saccharides and Alcohols	糖及醇类	25990-60-7
MWSmce690	UPLC-MS/MS	175.02	59.01	-	-	176.032	C6H8O6	[M-H]-	Erythorbic Acid; Isoascorbic Acid	异抗坏血酸	Others	其它类	Vitamin	维生素	89-65-6
MWSmce692	UPLC-MS/MS	277.22	59.01	-	-	278.225	C18H30O2	[M-H]-	γ-Linolenic Acid	γ-亚麻酸	Lipids	脂质	Free fatty acids	游离脂肪酸	506-26-3
MWSmce701	UPLC-MS/MS	135.08	79.05	-	-	134.073	C9H10O	[M+H]+	4-Ethylbenzaldehyde	4-乙基苯甲醛	Others	其它类	Others	其它	4748-78-1
MWSmce706	UPLC-MS/MS	129.07	56.05	-	-	128.059	C5H8N2O2	[M+H]+	Cyclo(Ala-Gly)	环(甘氨酰-L-丙氨酰)	Amino acids and derivatives	氨基酸及其衍生物	Amino acids and derivatives	氨基酸及其衍生物	4526-77-6
MWSslk035	UPLC-MS/MS	285.1	123.05	-	-	286.105	C13H18O7	[M-H]-	Orcinol glucoside	苔黑酚葡萄糖苷	Phenolic acids	酚酸类	Phenolic acids	酚酸类	21082-33-7
MWSslk081	UPLC-MS/MS	325.14	149.03	-	-	324.136	C20H20O4	[M+H]+	Bavachin	补骨脂二氢黄酮	Flavonoids	黄酮	Flavanones	二氢黄酮	19879-32-4
MWSslk097	UPLC-MS/MS	195.06	163.04	-	-	194.058	C10H10O4	[M+H]+	Dimethyl phthalate	邻苯二甲酸二甲酯	Phenolic acids	酚酸类	Phenolic acids	酚酸类	131-11-3
MWSslk138	UPLC-MS/MS	169.01	151	-	-	170.022	C7H6O5	[M-H]-	2,3,4-Trihydroxybenzoic acid	2,3,4-三羟基苯甲酸	Phenolic acids	酚酸类	Phenolic acids	酚酸类	610-02-6
MWSslk254	UPLC-MS/MS	595.17	287.06	-	-	594.158	C27H30O15	[M+H]+	Kaempferol-3-O-glucorhamnoside	山奈酚-3-O-葡萄糖鼠李糖苷	Flavonoids	黄酮	Flavonols	黄酮醇	40437-72-7
MWStz040	UPLC-MS/MS	116.07	70.07	-	-	115.063	C5H9NO2	[M+H]+	Pterolactam	蕨内酰胺	Alkaloids	生物碱	Pyrrole alkaloids	吡咯类生物碱	38072-88-7
MWStz043	UPLC-MS/MS	531.15	163.04	-	-	530.142	C26H26O12	[M+H]+	3,4-Di-O-caffeoylquinic acid methyl ester	3,4-O-二咖啡酰基奎宁酸甲酯	Phenolic acids	酚酸类	Phenolic acids	酚酸类	114637-83-1
MWStz070	UPLC-MS/MS	182.08	91.05	-	-	181.074	C9H11NO3	[M+H]+	N-(2-Hydroxy-4-methoxyphenyl)acetamide	N-(2-羟基-4-甲氧基苯基)乙酰胺	Alkaloids	生物碱	Phenolamine	酚胺	58469-06-0
pmb0484	UPLC-MS/MS	104.1	60.1	-	-	103.091	C5H13NO	[M+H]+	Choline	胆碱	Alkaloids	生物碱	Alkaloids	生物碱	62-49-7
pmb0530	UPLC-MS/MS	664.12	136.2	-	-	663.109	C21H27N7O14P2	[M+H]+	Nicotinic acid adenine dinucleotide	烟酸腺嘌呤二核苷酸	Nucleotides and derivatives	核苷酸及其衍生物	Nucleotides and derivatives	核苷酸及其衍生物	53-84-9
pmb0855	UPLC-MS/MS	496.34	184.07	-	-	495.332	C24H50NO7P	[M+H]+	LysoPC 16:0	溶血磷脂酰胆碱 16:0	Lipids	脂质	LPC	溶血磷脂酰胆碱	17364-16-8
pmb0876	UPLC-MS/MS	454.29	313.27	-	-	453.286	C21H44NO7P	[M+H]+	LysoPE 16:0	溶血磷脂酰乙醇胺 16:0	Lipids	脂质	LPE	溶血磷脂酰乙醇胺	53862-35-4
pmb0981	UPLC-MS/MS	348.07	136	-	-	347.063	C10H14N5O7P	[M+H]+	Adenosine 5'-monophosphate	腺苷-5'-单磷酸	Nucleotides and derivatives	核苷酸及其衍生物	Nucleotides and derivatives	核苷酸及其衍生物	61-19-8
pmb0998	UPLC-MS/MS	364.07	152.1	-	-	363.058	C10H14N5O8P	[M+H]+	Guanosine 5'-monophosphate	鸟苷 5'-单磷酸	Nucleotides and derivatives	核苷酸及其衍生物	Nucleotides and derivatives	核苷酸及其衍生物	85-32-5
pmb1754	UPLC-MS/MS	184	125	-	-	184.073	C5H15NO4P+	[M]+	O-Phosphocholine	O-磷酸胆碱	Alkaloids	生物碱	Alkaloids	生物碱	107-73-3
pmb2640	UPLC-MS/MS	199.17	199.17	-	-	200.178	C12H24O2	[M-H]-	Dodecanoic acid (Lauric acid)	十二烷酸(月桂酸)	Lipids	脂质	Free fatty acids	游离脂肪酸	143-07-7
pmd0130	UPLC-MS/MS	468.31	184.07	-	-	467.301	C22H46NO7P	[M+H]+	LysoPC 14:0	溶血磷脂酰胆碱 14:0	Lipids	脂质	LPC	溶血磷脂酰胆碱	20559-16-4
pmd0132	UPLC-MS/MS	496.34	184.07	-	-	495.332	C24H50NO7P	[M+H]+	LysoPC 16:0(2n isomer)	溶血磷脂酰胆碱 16:0(2n异构)	Lipids	脂质	LPC	溶血磷脂酰胆碱	-
pmd0136	UPLC-MS/MS	524.37	184.07	-	-	523.364	C26H54NO7P	[M+H]+	LysoPC 18:0(2n isomer)	溶血磷脂酰胆碱 18:0(2n异构)	Lipids	脂质	LPC	溶血磷脂酰胆碱	-
pmd0160	UPLC-MS/MS	454.29	313.27	-	-	453.286	C21H44NO7P	[M+H]+	LysoPE 16:0(2n isomer)	溶血磷脂酰乙醇胺 16:0(2n异构)	Lipids	脂质	LPE	溶血磷脂酰乙醇胺	-
pme0006	UPLC-MS/MS	116.07	70.1	-	-	115.063	C5H9NO2	[M+H]+	L-Proline	L-脯氨酸	Amino acids and derivatives	氨基酸及其衍生物	Amino acids and derivatives	氨基酸及其衍生物	147-85-3
pme0008	UPLC-MS/MS	176.1	113	-	-	175.096	C6H13N3O3	[M+H]+	L-Citrulline	L-瓜氨酸	Amino acids and derivatives	氨基酸及其衍生物	Amino acids and derivatives	氨基酸及其衍生物	372-75-8
pme0010	UPLC-MS/MS	106	60	-	-	105.043	C3H7NO3	[M+H]+	L-Serine	L-丝氨酸	Amino acids and derivatives	氨基酸及其衍生物	Amino acids and derivatives	氨基酸及其衍生物	56-45-1
pme0014	UPLC-MS/MS	148.06	84	-	-	147.053	C5H9NO4	[M+H]+	L-Glutamic acid	L-谷氨酸	Amino acids and derivatives	氨基酸及其衍生物	Amino acids and derivatives	氨基酸及其衍生物	56-86-0
pme0021	UPLC-MS/MS	166.09	120.08	-	-	165.07	C9H11NO2	[M+H]+	L-Phenylalanine	L-苯丙氨酸	Amino acids and derivatives	氨基酸及其衍生物	Amino acids and derivatives	氨基酸及其衍生物	63-91-2
pme0026	UPLC-MS/MS	147.11	84	-	-	146.106	C6H14N2O2	[M+H]+	L-Lysine	L-赖氨酸	Amino acids and derivatives	氨基酸及其衍生物	Amino acids and derivatives	氨基酸及其衍生物	56-87-1
pme0033	UPLC-MS/MS	137.05	119	-	-	136.039	C5H4N4O	[M+H]+	Hypoxanthine	次黄嘌呤	Nucleotides and derivatives	核苷酸及其衍生物	Nucleotides and derivatives	核苷酸及其衍生物	68-94-0
pme0040	UPLC-MS/MS	136.06	119	-	-	135.054	C5H5N5	[M+H]+	Adenine	腺嘌呤	Nucleotides and derivatives	核苷酸及其衍生物	Nucleotides and derivatives	核苷酸及其衍生物	73-24-5
pme0066	UPLC-MS/MS	116.1	74	-	-	117.054	C3H7N3O2	[M-H]-	Guanidinoacetate	乙酸胍	Amino acids and derivatives	氨基酸及其衍生物	Amino acids and derivatives	氨基酸及其衍生物	352-97-6
pme0075	UPLC-MS/MS	188.06	128	-	-	189.064	C7H11NO5	[M-H]-	N-Acetyl-L-glutamic acid	N-乙酰-L-谷氨酸	Amino acids and derivatives	氨基酸及其衍生物	Amino acids and derivatives	氨基酸及其衍生物	1188-37-0
pme0120	UPLC-MS/MS	118.09	101	-	-	117.079	C5H11NO2	[M+H]+	5-Aminovaleric acid	5-氨基戊酸	Organic acids	有机酸	Organic acids	有机酸	660-88-8
pme0122	UPLC-MS/MS	189.12	126	-	-	188.116	C8H16N2O3	[M+H]+	N6-Acetyl-L-lysine	N6-乙酰-L-赖氨酸	Amino acids and derivatives	氨基酸及其衍生物	Amino acids and derivatives	氨基酸及其衍生物	692-04-6
pme0137	UPLC-MS/MS	187.07	125	-	-	188.08	C7H12N2O4	[M-H]-	N-Acetyl-L-Glutamine	N-乙酰-L-谷氨酰胺	Amino acids and derivatives	氨基酸及其衍生物	Amino acids and derivatives	氨基酸及其衍生物	2490-97-3
pme0170	UPLC-MS/MS	217.13	158	-	-	216.122	C8H16N4O3	[M+H]+	N-Acetyl-L-Arginine	N-乙酰-L-精氨酸	Amino acids and derivatives	氨基酸及其衍生物	Amino acids and derivatives	氨基酸及其衍生物	155-84-0
pme0183	UPLC-MS/MS	152.06	135	-	-	151.049	C5H5N5O	[M+H]+	Isoguanine	异鸟嘌呤	Nucleotides and derivatives	核苷酸及其衍生物	Nucleotides and derivatives	核苷酸及其衍生物	3373-53-3
pme0193	UPLC-MS/MS	147.08	84	-	-	146.069	C5H10N2O3	[M+H]+	L-Glutamine	L-谷氨酰胺	Amino acids and derivatives	氨基酸及其衍生物	Amino acids and derivatives	氨基酸及其衍生物	56-85-9
pme0195	UPLC-MS/MS	120.02	62	-	-	121.02	C3H7NO2S	[M-H]-	L-Cysteine	L-半胱氨酸	Amino acids and derivatives	氨基酸及其衍生物	Amino acids and derivatives	氨基酸及其衍生物	52-90-4
pme0230	UPLC-MS/MS	268.1	136.06	-	-	267.097	C10H13N5O4	[M+H]+	Adenosine	腺苷	Nucleotides and derivatives	核苷酸及其衍生物	Nucleotides and derivatives	核苷酸及其衍生物	58-61-7
pme0243	UPLC-MS/MS	131.03	87.05	-	-	132.042	C5H8O4	[M-H]-	Glutaric acid	戊二酸	Organic acids	有机酸	Organic acids	有机酸	110-94-1
pme0253	UPLC-MS/MS	174.11	86	-	-	173.105	C8H15NO3	[M+H]+	N-Acetyl-L-leucine	N-乙酰-L-亮氨酸	Amino acids and derivatives	氨基酸及其衍生物	Amino acids and derivatives	氨基酸及其衍生物	1188-21-2
pme0256	UPLC-MS/MS	151.03	151	-	-	152.033	C5H4N4O2	[M-H]-	Xanthine	黄嘌呤	Nucleotides and derivatives	核苷酸及其衍生物	Nucleotides and derivatives	核苷酸及其衍生物	69-89-6
pme0257	UPLC-MS/MS	111.02	80	-	-	112.027	C4H4N2O2	[M-H]-	Uracil	尿嘧啶	Nucleotides and derivatives	核苷酸及其衍生物	Nucleotides and derivatives	核苷酸及其衍生物	66-22-8
pme0264	UPLC-MS/MS	243.1	127	-	-	242.09	C10H14N2O5	[M+H]+	Thymidine	胸苷	Nucleotides and derivatives	核苷酸及其衍生物	Nucleotides and derivatives	核苷酸及其衍生物	50-89-5
pme0274	UPLC-MS/MS	132.1	69	-	-	131.095	C6H13NO2	[M+H]+	6-Aminocaproic acid	6-氨基己酸	Organic acids	有机酸	Organic acids	有机酸	60-32-2
pme0278	UPLC-MS/MS	191.1	128	-	-	190.095	C7H14N2O4	[M+H]+	2,6-Diaminooimelic acid	2,6-二氨基庚二酸	Amino acids and derivatives	氨基酸及其衍生物	Amino acids and derivatives	氨基酸及其衍生物	583-93-7
pme0281	UPLC-MS/MS	165.02	121.03	-	-	166.027	C8H6O4	[M-H]-	Terephthalic acid	对苯二甲酸	Phenolic acids	酚酸类	Phenolic acids	酚酸类	100-21-0
pme0282	UPLC-MS/MS	165.02	77.04	-	-	166.027	C8H6O4	[M-H]-	Phthalic acid	邻苯二甲酸	Organic acids	有机酸	Organic acids	有机酸	88-99-3
pme0295	UPLC-MS/MS	146.08	86	-	-	145.074	C6H11NO3	[M+H]+	4-Acetamidobutyric acid	4-乙酰氨基丁酸	Organic acids	有机酸	Organic acids	有机酸	3025-96-5
pme0321	UPLC-MS/MS	431.1	285	-	-	432.106	C21H20O10	[M-H]-	Kaempferol-7-O-rhamnoside	山奈酚-7-O-鼠李糖苷	Flavonoids	黄酮	Flavonols	黄酮醇	20196-89-8
pme0368	UPLC-MS/MS	579.17	271.01	-	-	578.164	C27H30O14	[M+H]+	Apigenin-7-O-rutinoside (Isorhoifolin)	芹菜素-7-O-芸香糖苷 (异野漆树苷)	Flavonoids	黄酮	Flavones	黄酮	552-57-8
pme0376	UPLC-MS/MS	271.06	151	-	-	272.068	C15H12O5	[M-H]-	Naringenin (5,7,4'-Trihydroxyflavanone)	柚皮素	Flavonoids	黄酮	Flavanones	二氢黄酮	480-41-1
pme0422	UPLC-MS/MS	193.06	134	-	-	194.058	C10H10O4	[M-H]-	Isoferulic Acid	异阿魏酸	Phenolic acids	酚酸类	Phenolic acids	酚酸类	537-73-5
pme0490	UPLC-MS/MS	124.04	78	-	-	123.032	C6H5NO2	[M+H]+	Nicotinic acid (Vitamin B3)	烟酸 (维生素 B3)	Others	其它类	Vitamin	维生素	59-67-6
pme0513	UPLC-MS/MS	151.06	59	-	-	152.068	C5H12O5	[M-H]-	Xylitol	木糖醇	Others	其它类	Saccharides and Alcohols	糖及醇类	87-99-0
pme0516	UPLC-MS/MS	179.06	87	-	-	180.063	C6H12O6	[M-H]-	Inositol	肌醇	Others	其它类	Saccharides and Alcohols	糖及醇类	87-89-8
pme0519	UPLC-MS/MS	341.11	119.03	-	-	342.116	C12H22O11	[M-H]-	D-Sucrose	D-蔗糖	Others	其它类	Saccharides and Alcohols	糖及醇类	57-50-1
pme0534	UPLC-MS/MS	195.05	74.9	-	-	196.058	C6H12O7	[M-H]-	Gluconic acid	葡萄糖酸	Others	其它类	Saccharides and Alcohols	糖及醇类	526-95-4
pme1002	UPLC-MS/MS	138.09	103	-	-	137.084	C8H11NO	[M+H]+	L-Tyramine	L-酪胺	Amino acids and derivatives	氨基酸及其衍生物	Amino acids and derivatives	氨基酸及其衍生物	51-67-2
pme1014	UPLC-MS/MS	445.3	341.3	-	-	444.303	C31H40O2	[M+H]+	Menatetrenone (Vitamin K2)	四烯甲萘醌 (维生素 K2)	Others	其它类	Vitamin	维生素	11032-49-8
pme1109	UPLC-MS/MS	152.06	135	-	-	151.049	C5H5N5O	[M+H]+	Guanine	鸟嘌呤	Nucleotides and derivatives	核苷酸及其衍生物	Nucleotides and derivatives	核苷酸及其衍生物	73-40-5
pme1178	UPLC-MS/MS	284.1	152	-	-	283.092	C10H13N5O5	[M+H]+	Guanosine	鸟苷	Nucleotides and derivatives	核苷酸及其衍生物	Nucleotides and derivatives	核苷酸及其衍生物	118-00-3
pme1184	UPLC-MS/MS	268.1	152	-	-	267.097	C10H13N5O4	[M+H]+	2'-Deoxyguanosine	2'-脱氧鸟苷	Nucleotides and derivatives	核苷酸及其衍生物	Nucleotides and derivatives	核苷酸及其衍生物	961-07-9
pme1187	UPLC-MS/MS	257.08	124	-	-	258.085	C10H14N2O6	[M-H]-	5-Methyluridine	5-甲基尿苷	Nucleotides and derivatives	核苷酸及其衍生物	Nucleotides and derivatives	核苷酸及其衍生物	1463-10-1
pme1194	UPLC-MS/MS	228.1	112	-	-	227.091	C9H13N3O4	[M+H]+	2'-Deoxycytidine	2'-脱氧胞苷	Nucleotides and derivatives	核苷酸及其衍生物	Nucleotides and derivatives	核苷酸及其衍生物	951-77-9
pme1210	UPLC-MS/MS	150.06	61	-	-	149.051	C5H11NO2S	[M+H]+	L-Methionine	L-甲硫氨酸	Amino acids and derivatives	氨基酸及其衍生物	Amino acids and derivatives	氨基酸及其衍生物	63-68-3
pme1228	UPLC-MS/MS	221.09	204	-	-	220.085	C11H12N2O3	[M+H]+	5-Hydroxy-L-tryptophan	5-羟基-L-色氨酸	Amino acids and derivatives	氨基酸及其衍生物	Amino acids and derivatives	氨基酸及其衍生物	56-69-9
pme1261	UPLC-MS/MS	206.14	76	-	-	205.131	C9H19NO4	[M+H]+	D-Panthenol	D-泛酰醇	Others	其它类	Saccharides and Alcohols	糖及醇类	81-13-0
pme1286	UPLC-MS/MS	385.13	250	-	-	384.122	C14H20N6O5S	[M+H]+	S-(5'-Adenosy)-L-homocysteine	S-(5-腺苷)-L-高半胱氨酸	Amino acids and derivatives	氨基酸及其衍生物	Amino acids and derivatives	氨基酸及其衍生物	979-92-0
pme1383	UPLC-MS/MS	170.08	134.1	-	-	169.074	C8H11NO3	[M+H]+	Pyridoxine	吡哆醇	Others	其它类	Vitamin	维生素	65-23-6
pme1419	UPLC-MS/MS	164.07	104	-	-	163.067	C6H13NO2S	[M+H]+	L-Methionine methyl ester	L-甲硫氨酸甲酯	Amino acids and derivatives	氨基酸及其衍生物	Amino acids and derivatives	氨基酸及其衍生物	10332-17-9
pme1439	UPLC-MS/MS	165.05	119	-	-	164.047	C9H8O3	[M+H]+	p-coumaric acid	对香豆酸	Phenolic acids	酚酸类	Phenolic acids	酚酸类	501-98-4
pme1474	UPLC-MS/MS	298.1	136	-	-	297.09	C11H15N5O3S	[M+H]+	5'-Deoxy-5'-(methylthio)adenosine	5-脱氧-5-甲硫腺苷	Nucleotides and derivatives	核苷酸及其衍生物	Nucleotides and derivatives	核苷酸及其衍生物	2457-80-9
pme1540	UPLC-MS/MS	625.18	317.06	-	-	624.169	C28H32O16	[M+H]+	Isorhamnetin-3-O-neohesperidoside	异鼠李素-3-O-新橙皮糖苷	Flavonoids	黄酮	Flavonols	黄酮醇	55033-90-4
pme1598	UPLC-MS/MS	463.12	301	-	-	464.132	C22H24O11	[M-H]-	Hesperetin-5-O-glucoside	橙皮素-5-O-葡萄糖苷	Flavonoids	黄酮	Flavanonols	二氢黄酮醇	69651-80-5
pme1738	UPLC-MS/MS	138.08	95	-	-	137.071	C7H9N2O	[M+H]+	3-Carbamyl-1-methylpyridinium(1-Methylnicotinamide)	3-氨基甲酰-1-甲基氧化吡啶	Alkaloids	生物碱	Alkaloids	生物碱	1005-24-9
pme1816	UPLC-MS/MS	353.09	191	-	-	354.095	C16H18O9	[M-H]-	Neochlorogenic acid (5-O-Caffeoylquinic acid)*	新绿原酸 (5-O-咖啡酰奎宁酸)*	Phenolic acids	酚酸类	Phenolic acids	酚酸类	906-33-2
pme2134	UPLC-MS/MS	121	59	-	-	122.058	C4H10O4	[M-H]-	D-Threitol	D-苏糖醇	Others	其它类	Saccharides and Alcohols	糖及醇类	2418-52-2
pme2237	UPLC-MS/MS	181.07	101	-	-	182.079	C6H14O6	[M-H]-	Dulcitol	半乳糖醇	Others	其它类	Saccharides and Alcohols	糖及醇类	608-66-2
pme2266	UPLC-MS/MS	245.1	227	-	-	244.088	C10H16N2O3S	[M+H]+	Biotin	D-生物素	Others	其它类	Vitamin	维生素	58-85-5
pme2380	UPLC-MS/MS	145.01	101	-	-	146.022	C5H6O5	[M-H]-	α-Ketoglutaric acid	α-酮戊二酸	Organic acids	有机酸	Organic acids	有机酸	328-50-7
pme2433	UPLC-MS/MS	106.09	88	-	-	105.079	C4H11NO2	[M+H]+	Diethanolamine	二乙醇胺	Alkaloids	生物碱	Alkaloids	生物碱	111-42-2
pme2550	UPLC-MS/MS	173.02	137	-	-	174.016	C6H6O6	[M-H]-	Cis-Aconitic acid	顺式乌头酸	Organic acids	有机酸	Organic acids	有机酸	585-84-2
pme2559	UPLC-MS/MS	174.04	88	-	-	175.048	C6H9NO5	[M-H]-	N-Acetyl-L-Aspartic Acid	N-乙酰-L-天冬氨酸	Amino acids and derivatives	氨基酸及其衍生物	Amino acids and derivatives	氨基酸及其衍生物	997-55-7
pme2589	UPLC-MS/MS	159.1	87	-	-	160.037	C6H8O5	[M-H]-	2-Oxoadipic acid	2-氧代己二酸	Organic acids	有机酸	Organic acids	有机酸	3184-35-8
pme2596	UPLC-MS/MS	184.06	148	-	-	183.053	C8H9NO4	[M+H]+	4-Pyridoxic acid	4-吡哆酸	Others	其它类	Vitamin	维生素	82-82-6
pme2598	UPLC-MS/MS	167.03	123.04	-	-	168.042	C8H8O4	[M-H]-	3,4-Dihydroxybenzeneacetic acid	3,4-二羟基苯乙酸	Phenolic acids	酚酸类	Phenolic acids	酚酸类	102-32-9
pme2617	UPLC-MS/MS	166.05	102	-	-	165.046	C5H11NO3S	[M+H]+	L-Methionine Sulfoxide	蛋氨酸亚砜	Amino acids and derivatives	氨基酸及其衍生物	Amino acids and derivatives	氨基酸及其衍生物	3226-65-1
pme2651	UPLC-MS/MS	742.1	620.1	-	-	743.075	C21H28N7O17P3	[M-H]-	NADP (Nicotinamide adenine dinucleotide phosphate)	烟酰胺腺嘌呤二核苷酸磷酸	Nucleotides and derivatives	核苷酸及其衍生物	Nucleotides and derivatives	核苷酸及其衍生物	53-59-8
pme2693	UPLC-MS/MS	131.12	114.09	-	-	130.111	C6H14N2O	[M+H]+	N-Acetylputrescine	N-乙酰腐胺	Alkaloids	生物碱	Phenolamine	酚胺	18233-70-0
pme2735	UPLC-MS/MS	399.2	250	-	-	398.137	C15H22N6O5S	[M+H]+	S-Adenosyl-L-methionine	S-腺苷-L-蛋氨酸	Amino acids and derivatives	氨基酸及其衍生物	Amino acids and derivatives	氨基酸及其衍生物	29908-03-0
pme2746	UPLC-MS/MS	784.15	437	-	-	785.157	C27H33N9O15P2	[M-H]-	Riboflavin 5'-Adenosine Diphosphate	核黄素-5'-腺嘌呤二磷酸	Nucleotides and derivatives	核苷酸及其衍生物	Nucleotides and derivatives	核苷酸及其衍生物	146-14-5
pme2755	UPLC-MS/MS	222	144	-	-	221.09	C8H15NO6	[M+H]+	N-Acetyl-D-glucosamine	N-乙酰-D-葡萄糖胺	Others	其它类	Saccharides and Alcohols	糖及醇类	7512-17-6
pme2758	UPLC-MS/MS	162.04	144	-	-	163.048	C5H9NO5	[M-H]-	4-Hydroxy-L-glutamic acid	4-羟基-L-谷氨酸	Amino acids and derivatives	氨基酸及其衍生物	Amino acids and derivatives	氨基酸及其衍生物	3913-68-6
pme2827	UPLC-MS/MS	239	223	-	-	240.245	C16H32O	[M-H]-	Palmitaldehyde	棕榈醛	Lipids	脂质	Free fatty acids	游离脂肪酸	629-80-1
pme2828	UPLC-MS/MS	140	99	-	-	139.027	C6H5NO3	[M+H]+	4-Nitrophenol	4-硝基苯酚	Phenolic acids	酚酸类	Phenolic acids	酚酸类	100-02-7
pme2890	UPLC-MS/MS	269.06	136	-	-	268.055	C8H16N2O4S2	[M+H]+	L-Homocystine	L-高胱氨酸	Amino acids and derivatives	氨基酸及其衍生物	Amino acids and derivatives	氨基酸及其衍生物	626-72-2
pme2914	UPLC-MS/MS	161.05	99	-	-	162.053	C6H10O5	[M-H]-	3-Hydroxy-3-methylpentane-1,5-dioic acid	3-羟基-3-甲基谷氨酸	Amino acids and derivatives	氨基酸及其衍生物	Amino acids and derivatives	氨基酸及其衍生物	503-49-1
pme2954	UPLC-MS/MS	303.05	137.02	-	-	302.043	C15H10O7	[M+H]+	Quercetin	槲皮素	Flavonoids	黄酮	Flavonols	黄酮醇	117-39-5
pme2960	UPLC-MS/MS	273.08	153	-	-	272.068	C15H12O5	[M+H]+	Naringenin chalcone; 2',4,4',6'-Tetrahydroxychalcone	柚皮素查耳酮	Flavonoids	黄酮	Chalcones	查耳酮	73692-50-9
pme3007	UPLC-MS/MS	402.99	159	-	-	404.002	C9H14N2O12P2	[M-H]-	Uridine 5'-diphosphate	尿苷 5'-二磷酸	Nucleotides and derivatives	核苷酸及其衍生物	Nucleotides and derivatives	核苷酸及其衍生物	27821-45-0
pme3009	UPLC-MS/MS	175.02	99	-	-	174.016	C6H6O6	[M+H]+	Trans-Citridic acid	反式乌头酸	Organic acids	有机酸	Organic acids	有机酸	4023-65-8
pme3017	UPLC-MS/MS	104.07	58	-	-	103.063	C4H9NO2	[M+H]+	2-Aminoisobutyric acid	2-氨基异丁酸	Organic acids	有机酸	Organic acids	有机酸	62-57-7
pme3033	UPLC-MS/MS	104.07	86	-	-	103.063	C4H9NO2	[M+H]+	N,N-Dimethylglycine	N,N-二甲基甘氨酸	Amino acids and derivatives	氨基酸及其衍生物	Amino acids and derivatives	氨基酸及其衍生物	1118-68-9
pme3034	UPLC-MS/MS	131.03	69.03	-	-	132.042	C5H8O4	[M-H]-	Ethylmalonic acid	乙基丙二酸	Organic acids	有机酸	Organic acids	有机酸	601-75-2
pme3083	UPLC-MS/MS	164.04	120	-	-	165.043	C8H7NO3	[M-H]-	2-(Formylamino)benzoic acid	2-(甲酰氨基)苯甲酸	Phenolic acids	酚酸类	Phenolic acids	酚酸类	3342-77-6
pme3096	UPLC-MS/MS	118	74	-	-	119.022	C3H5NO4	[M-H]-	Aminomalonic acid	氨基丙二酸	Organic acids	有机酸	Organic acids	有机酸	1068-84-4
pme3163	UPLC-MS/MS	289	97	-	-	290.04	C7H15O10P	[M-H]-	D-Sedoheptuiose 7-phosphate	D-景天庚酮糖 7-磷酸	Others	其它类	Saccharides and Alcohols	糖及醇类	2646-35-7
pme3174	UPLC-MS/MS	324.06	112	-	-	323.052	C9H14N3O8P	[M+H]+	Cytidine 5'-monophosphate(Cytidylic acid)	胞苷-5'-单磷酸	Nucleotides and derivatives	核苷酸及其衍生物	Nucleotides and derivatives	核苷酸及其衍生物	63-37-6
pme3184	UPLC-MS/MS	332.08	136	-	-	331.068	C10H14N5O6P	[M+H]+	2'-Deoxyadenosine-5'-monophosphate	2'-脱氧腺苷-5'-单磷酸	Nucleotides and derivatives	核苷酸及其衍生物	Nucleotides and derivatives	核苷酸及其衍生物	653-63-4
pme3186	UPLC-MS/MS	169	79	-	-	169.998	C3H7O6P	[M-H]-	DL-Glyceraldehyde-3-phosphate	DL-甘油醛-3-磷酸	Organic acids	有机酸	Organic acids	有机酸	591-59-3
pme3188	UPLC-MS/MS	323.03	211	-	-	324.036	C9H13N2O9P	[M-H]-	Uridine 5'-monophosphate	尿苷 5'-单磷酸	Nucleotides and derivatives	核苷酸及其衍生物	Nucleotides and derivatives	核苷酸及其衍生物	58-97-9
pme3193	UPLC-MS/MS	116.04	74	-	-	117.043	C4H7NO3	[M-H]-	N-Acetyl-L-glycine	N-乙酰-L-甘氨酸	Amino acids and derivatives	氨基酸及其衍生物	Amino acids and derivatives	氨基酸及其衍生物	543-24-8
pme3207	UPLC-MS/MS	141.02	59	-	-	142.027	C6H6O4	[M-H]-	Muconic acid	己二烯二酸	Organic acids	有机酸	Organic acids	有机酸	1119-72-8
pme3250	UPLC-MS/MS	285.08	270	-	-	284.068	C16H12O5	[M+H]+	Biochanin A	鹰嘴豆芽素 A	Flavonoids	黄酮	Isoflavones	异黄酮	491-80-5
pme3313	UPLC-MS/MS	259	97	-	-	260.03	C6H13O9P	[M-H]-	D-Fructose 6-phosphate	D-果糖-6-磷酸	Others	其它类	Saccharides and Alcohols	糖及醇类	643-13-0
pme3337	UPLC-MS/MS	384.12	252	-	-	383.108	C14H17N5O8	[M+H]+	Succinyladenosine	琥珀酰腺苷	Nucleotides and derivatives	核苷酸及其衍生物	Nucleotides and derivatives	核苷酸及其衍生物	4542-23-8
pme3351	UPLC-MS/MS	144.1	126	-	-	145.074	C6H11NO3	[M-H]-	Allysine(6-Oxo DL-Norleucine)	烯丙酯	Others	其它类	Others	其它	1962-83-0
pme3382	UPLC-MS/MS	160.06	98	-	-	161.069	C6H11NO4	[M-H]-	N-Acetyl-L-threonine	N-乙酰-L-苏氨酸	Amino acids and derivatives	氨基酸及其衍生物	Amino acids and derivatives	氨基酸及其衍生物	17093-74-2
pme3443	UPLC-MS/MS	207.07	192	-	-	208.074	C11H12O4	[M-H]-	Sinapinaldehyde	芥子醛	Phenolic acids	酚酸类	Phenolic acids	酚酸类	4206-58-0
pme3514	UPLC-MS/MS	301.04	151	-	-	302.043	C15H10O7	[M-H]-	Morin	桑色素	Flavonoids	黄酮	Flavonols	黄酮醇	480-16-0
pme3732	UPLC-MS/MS	244.09	112	-	-	243.086	C9H13N3O5	[M+H]+	Cytidine	胞苷	Nucleotides and derivatives	核苷酸及其衍生物	Nucleotides and derivatives	核苷酸及其衍生物	65-46-3
pme3961	UPLC-MS/MS	252.11	136	-	-	251.102	C10H13N5O3	[M+H]+	2'-Deoxyadenosine	2'-脱氧腺苷	Nucleotides and derivatives	核苷酸及其衍生物	Nucleotides and derivatives	核苷酸及其衍生物	958-09-8
pme3967	UPLC-MS/MS	312.13	180	-	-	311.123	C12H17N5O5	[M+H]+	2-(Dimethylamino)guanosine	2-(二甲基氨基)鸟苷	Nucleotides and derivatives	核苷酸及其衍生物	Nucleotides and derivatives	核苷酸及其衍生物	2140-67-2
pmf0289	UPLC-MS/MS	336.17	148	-	-	335.159	C15H21N5O4	[M+H]+	Riboprine	利波腺苷	Phenolic acids	酚酸类	Phenolic acids	酚酸类	7724-76-7
pmf0297	UPLC-MS/MS	297.32	183.1	-	-	298.324	C20H42O	[M-H]-	1-Eicosanol	正二十醇	Lipids	脂质	Free fatty acids	游离脂肪酸	629-96-9
pmf0440	UPLC-MS/MS	163.08	91.1	-	-	162.068	C10H10O2	[M+H]+	4-MethoxycinnaMaldehyde	4-甲氧基肉桂醛	Phenolic acids	酚酸类	Phenolic acids	酚酸类	1963-36-6
