# Supplementary material for: Metabolomics Analysis Reveals the Differences Between Bupleurum chinense DC. and Bupleurum scorzonerifolium Willd
Source: Front Plant Sci. 2022 Jul 13;13:933849. doi: 10.3389/fpls.2022.933849 (PMC9328751; doi:10.3389/fpls.2022.933849)
Supplement: Supplementary file 9 [file Table_9.XLSX]

## Sheet: Figure 2C
	Type	Number	Percentage（%）
	Terpenoids	254	13.9714
	Flavonoids	201	11.0561
	Others	184	10.121
	Phenolic acids	175	9.62596
	Ester	134	7.37074
	Lipids	129	7.09571
	Heterocyclic compound	86	4.73047
	Lignans and Coumarins	84	4.62046
	Amino acids and derivatives	83	4.56546
	Ketone	82	4.51045
	Alcohol	79	4.34543
	Organic acids	69	3.79538
	Hydrocarbons	62	3.41034
	Nucleotides and derivatives	60	3.30033
	Aldehyde	49	2.69527
	Aromatics	45	2.47525
	Alkaloids	42	2.31023
	sum	1818

## Sheet: Figure 4D
group name	down regulated	up regulated	All sig diff
BcR_vs_BsR	512	247	759
BcS_vs_BsS	306	423	729
BcL_vs_BsL	203	641	844
BcF_vs_BsF	270	452	722
BcR_vs_BcS	243	743	986
BcR_vs_BcL	276	721	997
BcR_vs_BcF	209	841	1050
BcS_vs_BcL	245	247	492
BcS_vs_BcF	129	617	746
BcL_vs_BcF	118	669	787
BsR_vs_BsS	181	796	977
BsR_vs_BsL	187	901	1088
BsR_vs_BsF	137	966	1103
BsS_vs_BsL	140	503	643
BsS_vs_BsF	118	775	893
BsL_vs_BsF	169	430	599

## Sheet: Table 1
Type	Number	Percentage（%）
Terpenoids	150	19.8
Phenolic acids	73	9.6
Flavonoids	72	9.5
Lipids	44	5.8
Lignans and Coumarins	43	5.7
Hydrocarbons	27	3.6
Alkaloids	15	2
