# Supplementary material for: Metabolomics Analysis Reveals the Differences Between Bupleurum chinense DC. and Bupleurum scorzonerifolium Willd.
Source: Frontiers journal article supplement (doi:10.3389/fpls.2022.933849), 2022-07-13
Supplement: Table_1.XLSX [file Table_1.XLSX]

## Sheet: Sheet1
Index	Platform	Q1 (Da)	Q3 (Da)	Quantitative ion	Qualitative ion	Molecular Weight (Da)	Formula	Ionization model	Compounds	物质	Class I	物质一级分类	Class II	物质二级分类	CAS	Level	NIST_RI	BcR1	BcR2	BcR3	BcS1	BcS2	BcS3	BcL1	BcL2	BcL3	BcF1	BcF2	BcF3	BsR1	BsR2	BsR3	BsS1	BsS2	BsS3	BsL1	BsL2	BsL3	BsF1	BsF2	BsF3	mix01	mix02	mix03	cpd_ID	kegg_map
pmb0782	UPLC-MS/MS	86.1	69.2	-	-	85.089	C5H11N	[M+H]+	Piperidine	哌啶	Alkaloids	生物碱	Alkaloids	生物碱	110-89-4	3	-	2099000	1989700	5159400	3648500	3152300	3466700	2781300	2626500	2125700	7414700	9038700	11121000	2533600	960110	1417600	1661100	3041600	1972600	2649600	2267900	2767300	11008000	10984000	11407000	4458000	4112900	3801400	C01746	ko00960
pme1974	UPLC-MS/MS	87.01	43	-	-	88.016	C3H4O3	[M-H]-	Pyruvic acid	丙酮酸	Organic acids	有机酸	Organic acids	有机酸	127-17-3	3	-	42064	49322	61714	95694	116290	121210	53800	38299	34580	43778	40021	38820	90537	64959	99206	153130	113490	116600	100180	136460	74779	41563	45206	52438	61757	85927	96690	C00022	ko00010,ko00020,ko00030,ko00040,ko00053,ko00250,ko00260,ko00261,ko00270,ko00290,ko00330,ko00350,ko00360,ko00430,ko00440,ko00620,ko00630,ko00650,ko00660,ko00710,ko00730,ko00760,ko00770,ko00900,ko01100,ko01110,ko01200,ko01210,ko01230,ko01240
Lmqp000873	UPLC-MS/MS	101.02	55.02	-	-	100.018	C4H4O3	[M+H]+	Succinic anhydride	琥珀酸酐	Organic acids	有机酸	Organic acids	有机酸	108-30-5	3	-	358050	321950	147500	490070	314760	138640	300070	272380	81627	720860	444950	219330	222060	282420	189730	217500	683610	279010	127240	331600	106690	339520	565140	302070	367150	343790	343320	C19524	--
mws4052	UPLC-MS/MS	102.06	56.05	-	-	101.048	C4H7NO2	[M+H]+	1-Aminocyclopropane-1-carboxylic acid	1-氨基环丙烷-1-羧酸	Organic acids	有机酸	Organic acids	有机酸	22059-21-8	3	-	259850	320080	159640	78860	64141	148640	29782	55019	47627	78688	67488	179590	179240	175110	215230	119300	97263	143650	49872	34088	42341	97154	64959	116630	91200	99144	86571	C01234	ko00270,ko01100,ko01110
Jmyp000635	UPLC-MS/MS	102.05	56.05	-	-	101.048	C4H7NO2	[M+H]+	L-azetidine-2-carboxylicacid	L-三亚甲基亚胺-2-羧酸	Alkaloids	生物碱	Alkaloids	生物碱	2133-34-8	3	-	340240	284840	190820	182460	154990	187690	48758	56413	86977	165100	190680	234010	179190	179740	204710	155000	172740	165040	59703	79459	55628	173490	125920	152650	152300	118150	128950	--	--
pme3033	UPLC-MS/MS	104.07	86	-	-	103.063	C4H9NO2	[M+H]+	N,N-Dimethylglycine	N,N-二甲基甘氨酸	Amino acids and derivatives	氨基酸及其衍生物	Amino acids and derivatives	氨基酸及其衍生物	1118-68-9	3	-	2823300	1308900	4304300	6953000	6479600	7208100	3227000	3535200	3689800	5797600	6261900	6860100	1201600	1051400	1497900	4869100	4958600	4752600	3754400	3879200	2781600	5796300	5651900	5074000	4112500	4814600	4280400	C01026	ko00260,ko01100
pme3017	UPLC-MS/MS	104.07	58	-	-	103.063	C4H9NO2	[M+H]+	2-Aminoisobutyric acid	2-氨基异丁酸	Organic acids	有机酸	Organic acids	有机酸	62-57-7	3	-	9332200	9241000	10596000	6697000	6741600	7545500	6975400	7317300	7743900	13291000	13898000	13553000	10186000	11050000	14071000	5886000	6385900	7167800	7532400	8545000	7787600	13795000	13633000	15462000	8142600	10011000	9450900	C03665	--
pmb0484	UPLC-MS/MS	104.1	60.1	-	-	103.091	C5H13NO	[M+H]+	Choline	胆碱	Alkaloids	生物碱	Alkaloids	生物碱	62-49-7	3	-	19236000	18447000	21144000	16273000	14577000	16052000	14446000	14877000	15504000	27219000	28534000	27982000	19573000	22272000	30845000	11772000	12380000	16388000	16518000	17962000	15432000	28926000	28420000	32925000	16907000	19928000	19834000	C00114	ko00260,ko00564,ko01100,ko02010
Lmbn000193	UPLC-MS/MS	103	59.01	-	-	104.011	C3H4O4	[M-H]-	Tartronate semialdehyde	羟基丙二酸半醛	Organic acids	有机酸	Organic acids	有机酸	2480-77-5	3	-	6171600	6391500	6303400	484410	337990	690580	1271200	901510	1656900	873880	813340	1878700	312260	241440	473060	506450	331010	481790	751960	595890	722690	610170	388220	545130	1105400	1413900	1406200	C01146	ko00053,ko00630,ko01100
ML10172161	UPLC-MS/MS	103	59.01	-	-	104.011	C3H4O4	[M-H]-	Hydroxypyruvic acid	羟基丙酮酸	Organic acids	有机酸	Organic acids	有机酸	1113-60-6	3	-	8083500	9065900	8410200	686650	615780	1091200	1777900	1222600	2082400	1215900	1182400	2675000	457720	343650	624810	708540	551190	750320	951930	805070	1043000	781720	567080	753930	1679800	2170500	2064900	C00168	ko00260,ko00630,ko01100,ko01110,ko01200
mws0574	UPLC-MS/MS	103.04	57.03	-	-	104.047	C4H8O3	[M-H]-	2-Hydroxyisobutyric acid	2-羟基异丁酸	Organic acids	有机酸	Organic acids	有机酸	594-61-6	3	-	58468	35737	83180	352920	252430	173890	157750	191060	163790	378620	297310	401890	37399	27544	29235	148780	209390	144040	104860	100800	59951	264370	264260	255130	120620	151310	171290	C21297	--
mws0576	UPLC-MS/MS	103.04	59.1	-	-	104.047	C4H8O3	[M-H]-	3-Hydroxybutyric acid	3-羟基丁酸	Organic acids	有机酸	Organic acids	有机酸	300-85-6	3	-	41316000	45844000	41328000	6755000	5657600	9378600	9824200	7209500	12087000	6008400	5113200	13718000	3186500	2755000	4599200	7350200	5730900	6132000	5633300	4466200	5935700	3907300	2868300	3700600	9800800	11849000	12255000	C01089	ko00072,ko00650,ko01100
pme1975	UPLC-MS/MS	103	59	-	-	104.06	C3H4O4	[M-H]-	Malonic acid	丙二酸	Organic acids	有机酸	Organic acids	有机酸	141-82-2	3	-	33789000	38126000	32601000	5285000	4208300	7114500	7833900	5961200	10332000	4020200	3949000	11193000	2352600	1824700	4015200	6140900	4698100	5097900	4678800	4007400	4984500	3490000	2741000	3260800	7759100	10019000	11106000	C00383	ko00061,ko00240,ko00410,ko01100,ko01212
pme0010	UPLC-MS/MS	106	60	-	-	105.043	C3H7NO3	[M+H]+	L-Serine	L-丝氨酸	Amino acids and derivatives	氨基酸及其衍生物	Amino acids and derivatives	氨基酸及其衍生物	56-45-1	3	-	732880	669040	571400	1044800	1317600	1020500	321130	366500	444450	757710	768830	1335200	688680	760750	851360	1520800	1335400	1721900	436210	331100	304590	790230	771730	733690	727460	862750	859080	C00065	ko00260,ko00261,ko00270,ko00460,ko00564,ko00600,ko00630,ko00920,ko00970,ko01100,ko01110,ko01200,ko01230,ko01240,ko02010
pme2433	UPLC-MS/MS	106.09	88	-	-	105.079	C4H11NO2	[M+H]+	Diethanolamine	二乙醇胺	Alkaloids	生物碱	Alkaloids	生物碱	111-42-2	3	-	47384	40053	45644	122860	89483	92934	39767	30492	43258	40166	39430	60945	28246	32768	23428	127020	115310	159800	42900	31556	31687	47973	43331	29395	54477	52754	40694	C06772	ko00564
MWS2076	UPLC-MS/MS	110.06	65.04	-	-	109.053	C6H7NO	[M+H]+	2-Aminophenol	2-氨基苯酚	Alkaloids	生物碱	Alkaloids	生物碱	95-55-6	3	-	7209.5	2925.6	5035.4	30294	22511	37931	47723	30537	21566	59052	84752	41849	3633.2	1639.5	1568.7	4264	6835.1	7198	18949	28264	13247	25290	16316	22578	8230.6	15418	13872	C01987	ko00380,ko01100
MWS5173	UPLC-MS/MS	112.05	70.03	-	-	111.043	C4H5N3O	[M+H]+	Isocytosine	异胞嘧啶	Nucleotides and derivatives	核苷酸及其衍生物	Nucleotides and derivatives	核苷酸及其衍生物	108-53-2	3	-	171250	169290	581110	36900	23446	61711	22432	39083	44261	22746	53585	79479	178860	144980	207080	24290	18901	27125	86184	26776	70164	179180	136690	228150	210540	191390	251170	--	--
mws0255	UPLC-MS/MS	112.05	95	-	-	111.043	C4H5N3O	[M+H]+	Cytosine	胞嘧啶	Nucleotides and derivatives	核苷酸及其衍生物	Nucleotides and derivatives	核苷酸及其衍生物	71-30-7	2	-	470170	483860	371180	780250	1006400	977130	1750800	2148500	2063200	916000	1642000	1714800	557730	368900	583490	835810	678680	1159000	2561400	1253600	1187000	1353800	761930	995980	1192000	1288600	1237100	C00380	ko00240,ko01100
pme0257	UPLC-MS/MS	111.02	80	-	-	112.027	C4H4N2O2	[M-H]-	Uracil	尿嘧啶	Nucleotides and derivatives	核苷酸及其衍生物	Nucleotides and derivatives	核苷酸及其衍生物	66-22-8	3	-	69309	80311	81246	113700	142700	103660	229110	197790	140230	88236	91493	110350	122260	122280	105160	122400	137300	155980	121100	149870	152070	94618	82419	108900	115440	114800	142840	C00106	ko00240,ko00410,ko00770,ko01100
MWStz040	UPLC-MS/MS	116.07	70.07	-	-	115.063	C5H9NO2	[M+H]+	Pterolactam	蕨内酰胺	Alkaloids	生物碱	Pyrrole alkaloids	吡咯类生物碱	38072-88-7	1	-	213020	126850	144420	287080	254710	214620	115570	109360	92350	1168600	2411900	921060	70148	115800	82916	191240	168120	194900	171630	119830	83056	2266300	4156300	2371500	1249800	1131600	1019100	--	--
pme0006	UPLC-MS/MS	116.07	70.1	-	-	115.063	C5H9NO2	[M+H]+	L-Proline	L-脯氨酸	Amino acids and derivatives	氨基酸及其衍生物	Amino acids and derivatives	氨基酸及其衍生物	147-85-3	1	-	308720	193780	235050	355480	285190	282570	174160	146490	134210	1582800	3125800	1266400	139160	183450	158100	258150	230110	298020	255320	175890	143930	3287800	5589000	3122600	1669700	1570800	1376800	C00148	ko00330,ko00332,ko00970,ko01100,ko01110,ko01230,ko02010
mws0376	UPLC-MS/MS	115	71	-	-	116.011	C4H4O4	[M-H]-	Fumaric acid	延胡索酸(富马酸,反丁烯二酸)	Organic acids	有机酸	Organic acids	有机酸	110-17-8	3	-	48967	39429	82917	390950	296500	299080	101230	86021	94676	53549	339090	126320	94467	90200	98412	298880	231310	253480	142800	241780	59573	99605	399760	207430	113270	141260	149940	C00122	ko00020,ko00190,ko00220,ko00250,ko00350,ko00360,ko00620,ko00650,ko00760,ko01100,ko01110,ko01200
pme3193	UPLC-MS/MS	116.04	74	-	-	117.043	C4H7NO3	[M-H]-	N-Acetyl-L-glycine	N-乙酰-L-甘氨酸	Amino acids and derivatives	氨基酸及其衍生物	Amino acids and derivatives	氨基酸及其衍生物	543-24-8	3	-	5804	6647.1	2957.5	14536	15815	8638	3934	3164.3	2993.8	3393.1	6406.9	14212	4792.6	773.56	3134.3	9834.2	6528.4	10890	2978.8	3061	1324.1	8865.3	10654	13290	4147.2	5851.8	6085.2	--	--
pme0066	UPLC-MS/MS	116.1	74	-	-	117.054	C3H7N3O2	[M-H]-	Guanidinoacetate	乙酸胍	Amino acids and derivatives	氨基酸及其衍生物	Amino acids and derivatives	氨基酸及其衍生物	352-97-6	3	-	2465.5	2616.4	4090.3	15054	21402	6279.4	3247.3	1372.9	4181.3	3825.1	4281.9	9974.1	2297.1	2846.7	2031.5	9415	10345	11043	1411.2	1671.8	3481.3	4877.2	7227.1	12952	5832.6	5047.4	3144.6	C00581	ko00260,ko00330,ko01100
mws0256	UPLC-MS/MS	118.09	72.1	-	-	117.079	C5H11NO2	[M+H]+	L-Valine	L-缬氨酸	Amino acids and derivatives	氨基酸及其衍生物	Amino acids and derivatives	氨基酸及其衍生物	72-18-4	1	-	5191100	3823000	5805800	5964500	5577000	5189200	5032300	4474800	3890300	9683800	9043300	12289000	4516100	2501100	2981300	3149400	4770500	3828500	5339800	4632500	3549600	12992000	12308000	13337000	6989800	6827600	6372300	C00183	ko00280,ko00290,ko00311,ko00460,ko00770,ko00966,ko00970,ko01100,ko01110,ko01210,ko01230,ko01240,ko02010
pme0120	UPLC-MS/MS	118.09	101	-	-	117.079	C5H11NO2	[M+H]+	5-Aminovaleric acid	5-氨基戊酸	Organic acids	有机酸	Organic acids	有机酸	660-88-8	3	-	30729	15205	34426	88021	42408	63854	62308	49361	73787	87779	73868	61161	19372	14807	29563	51348	38046	49752	69037	45973	45019	83070	53321	67140	39435	54297	43549	C00431	ko00310,ko00330,ko01100
mws0191	UPLC-MS/MS	118.09	59	-	-	117.079	C5H11NO2	[M+H]+	Betaine	甜菜碱	Alkaloids	生物碱	Alkaloids	生物碱	107-43-7	2	-	1275300	1181300	1102300	1023600	1890900	827820	1620500	1560700	1542600	1461500	1791400	1797400	1260600	1072900	1120000	2269100	1560100	1896200	2694900	1799200	2581600	2431000	1909600	2104300	1354300	1529400	1639300	C00719	ko00260,ko01100,ko02010
mws0470	UPLC-MS/MS	117.02	73	-	-	118.027	C4H6O4	[M-H]-	Methylmalonic acid	甲基丙二酸	Organic acids	有机酸	Organic acids	有机酸	516-05-2	2	-	50954000	57190000	27564000	54864000	54699000	21448000	70235000	89224000	34376000	110370000	94825000	54067000	33384000	44685000	32669000	31091000	55948000	39733000	41264000	83175000	41456000	61430000	105180000	95497000	43496000	58543000	58092000	C02170	ko00240,ko00280,ko00640,ko01100
mws0192	UPLC-MS/MS	117.02	73	-	-	118.027	C4H6O4	[M-H]-	Succinic acid	琥珀酸	Organic acids	有机酸	Organic acids	有机酸	110-15-6	2	-	44475000	53924000	25433000	50506000	49553000	18658000	65519000	86176000	31825000	108370000	87131000	52688000	32350000	43018000	30089000	26806000	50716000	36133000	37630000	77408000	38197000	59526000	91517000	87711000	42694000	55573000	53532000	C00042	ko00020,ko00190,ko00250,ko00310,ko00350,ko00360,ko00620,ko00630,ko00640,ko00650,ko00760,ko00920,ko01100,ko01110,ko01200
mws0147	UPLC-MS/MS	117.06	59	-	-	118.063	C5H10O3	[M-H]-	β-Hydroxyisovaleric acid	β-羟基异戊酸	Organic acids	有机酸	Organic acids	有机酸	625-08-1	3	-	145090	64336	147720	67810	26832	55069	124820	52344	70646	356550	119560	166610	104020	83150	63806	33344	63607	45643	107190	111460	86131	219560	191030	159860	77415	79736	91241	C20827	ko00280,ko01100
pme3096	UPLC-MS/MS	118	74	-	-	119.022	C3H5NO4	[M-H]-	Aminomalonic acid	氨基丙二酸	Organic acids	有机酸	Organic acids	有机酸	1068-84-4	3	-	1770800	2219200	878930	2018200	1932000	716860	2657500	3476300	1141300	4520500	4028500	1964900	1211600	1690200	1216600	1040300	2109400	1427000	1486200	3238400	1576600	2342200	4401100	3656700	1578300	2217800	2222100	C00872	--
mws0230	UPLC-MS/MS	120.07	74	-	-	119.058	C4H9NO3	[M+H]+	L-Threonine	L-苏氨酸	Amino acids and derivatives	氨基酸及其衍生物	Amino acids and derivatives	氨基酸及其衍生物	72-19-5	1	-	1187700	1066500	921070	1626500	1883000	1327600	408000	423420	549180	928950	730030	1525200	823000	408240	745040	1588600	1650800	2129800	636500	511440	389310	865720	907930	975750	911050	869730	984300	C00188	ko00260,ko00261,ko00290,ko00860,ko00970,ko01100,ko01110,ko01230,ko02010
mws0671	UPLC-MS/MS	120.07	74.1	-	-	119.058	C4H9NO3	[M+H]+	L-Homoserine	L-高丝氨酸	Organic acids	有机酸	Organic acids	有机酸	672-15-1	3	-	1261900	943270	1030700	1592000	1460800	1357100	374620	456870	406780	883660	512140	1159100	950830	368200	597190	1718700	1880600	2200800	606420	487750	344930	729050	673600	740150	906620	927050	969470	C00263	ko00260,ko00270,ko00300,ko00920,ko01100,ko01110,ko01230
pmp001287	UPLC-MS/MS	120.08	103.05	-	-	119.073	C8H9N	[M+H]+	N-Benzylmethylene isomethylamine	N-苯亚甲基异甲胺	Alkaloids	生物碱	Alkaloids	生物碱	-	1	-	2132800	1596900	3363100	3616700	3356600	2573700	4993500	4003900	3235200	6272900	6712800	6432300	1853900	652510	1180600	1539200	1948600	1665000	4160300	3780700	3613300	8075000	6386700	7927100	3650100	3227700	3535900	--	--
pme0195	UPLC-MS/MS	120.02	62	-	-	121.02	C3H7NO2S	[M-H]-	L-Cysteine	L-半胱氨酸	Amino acids and derivatives	氨基酸及其衍生物	Amino acids and derivatives	氨基酸及其衍生物	52-90-4	3	-	20957	9165.7	111150	9	9	9	9	9	3504.6	9	9	9	31916	47642	11408	9	9	9	9	6075.2	9	9	9	9	10990	11943	14321	C00097	ko00260,ko00270,ko00311,ko00332,ko00430,ko00460,ko00480,ko00730,ko00770,ko00920,ko00970,ko01100,ko01110,ko01200,ko01230,ko01240,ko04122
mws0491	UPLC-MS/MS	122.1	105	-	-	121.089	C8H11N	[M+H]+	Phenethylamine	2-苯乙胺	Alkaloids	生物碱	Alkaloids	生物碱	64-04-0	3	-	57654	53674	48118	43301	94062	19720	71182	17582	40768	478330	402540	248520	6262.9	9	9	27386	26812	21669	38856	50423	52950	101630	174750	116030	72204	53832	72211	C05332	ko00360,ko01100
mws0628	UPLC-MS/MS	121.03	92	-	-	122.037	C7H6O2	[M-H]-	4-Hydroxybenzaldehyde	对羟基苯甲醛	Phenolic acids	酚酸类	Phenolic acids	酚酸类	123-08-0	3	-	66830	61686	132520	219060	192120	431550	297920	168520	838770	297520	195720	447080	88814	92683	90131	267820	272500	224280	139680	139880	101900	121390	116700	105500	180730	246020	238510	C00633	ko01100
mws0133	UPLC-MS/MS	123.06	80.05	-	-	122.048	C6H6N2O	[M+H]+	Nicotinamide	烟酰胺	Others	其它类	Vitamin	维生素	98-92-0	2	-	602150	427340	669370	164310	307110	191210	571640	896770	603940	1581300	2427100	1831800	354300	415190	373600	86397	171870	174780	133050	716370	728700	1041200	1116100	1711600	680020	705400	759840	C00153	ko00760,ko01100,ko01240
pme2134	UPLC-MS/MS	121	59	-	-	122.058	C4H10O4	[M-H]-	D-Threitol	D-苏糖醇	Others	其它类	Saccharides and Alcohols	糖及醇类	2418-52-2	3	-	1729100	1678100	1993400	1550800	1288800	1619300	1939800	1575700	1408800	1866200	1919100	1999800	1785000	2304500	1917000	2181200	1766500	2347300	2216100	2027100	1699900	2051700	2181300	2332500	1584800	2005200	2134600	C16884	--
Lmbp000668	UPLC-MS/MS	124.04	78.03	-	-	123.032	C6H5NO2	[M+H]+	Isonicotinic acid	异烟酸	Others	其它类	Vitamin	维生素	55-22-1	3	-	369810	208650	471540	952060	642920	583360	173890	135540	193380	1865900	1322200	2393100	406130	298530	321320	497750	508340	802850	665740	267560	452140	2539900	1541800	2179300	890220	822710	742410	C07446	--
pme0490	UPLC-MS/MS	124.04	78	-	-	123.032	C6H5NO2	[M+H]+	Nicotinic acid (Vitamin B3)	烟酸 (维生素 B3)	Others	其它类	Vitamin	维生素	59-67-6	2	-	346910	201390	438560	883880	688570	592140	305440	199480	320880	1747500	1288200	2188800	397090	280960	322740	525120	477930	727650	577920	279400	301030	2445700	1664500	2001500	783200	787030	729280	C00253	ko00760,ko00960,ko01100,ko01110,ko01240
pme1216	UPLC-MS/MS	122.03	78	-	-	123.032	C6H5NO2	[M-H]-	2-Picolinic acid	2-吡啶甲酸	Organic acids	有机酸	Organic acids	有机酸	98-98-6	3	-	55632	46126	111620	282980	275310	199110	79382	85397	100630	645940	541820	1091400	98626	66427	91122	158900	131040	238390	141320	108770	115400	987220	719880	1012800	175890	238590	247760	C10164	ko00380,ko01100
pmp001086	UPLC-MS/MS	127.04	97	-	-	126.032	C6H6O3	[M+H]+	5-Hydroxymethylfurfural	5-羟甲基糠醛	Phenolic acids	酚酸类	Phenolic acids	酚酸类	67-47-0	3	-	43153	45756	23659	21807	4536.9	29257	17947	6380	12978	9429.7	26233	16633	35149	4679.7	23064	65277	68468	82460	14331	16497	5807.6	19190	33213	13192	32913	21130	35410	C11101	--
MWS2027	UPLC-MS/MS	129.03	69	-	-	128.022	C4H4N2O3	[M+H]+	Barbituric acid;Malonylurea;2,4,6-Pyrimidinetrione	巴比妥酸;丙二酰脲;2,4,6-嘧啶三酮	Nucleotides and derivatives	核苷酸及其衍生物	Nucleotides and derivatives	核苷酸及其衍生物	67-52-7	3	-	2264100	1813500	3341200	490480	656770	1156200	236100	101210	199420	377300	141060	359380	1723600	1788300	1653400	611680	988660	468010	368560	222250	328270	525710	818910	430880	522300	801630	490410	C00813	ko00240,ko01100
MWSmce706	UPLC-MS/MS	129.07	56.05	-	-	128.059	C5H8N2O2	[M+H]+	Cyclo(Ala-Gly)	环(甘氨酰-L-丙氨酰)	Amino acids and derivatives	氨基酸及其衍生物	Amino acids and derivatives	氨基酸及其衍生物	4526-77-6	2	-	148420	128060	76560	86423	55765	75261	48400	58728	31919	90585	93819	115740	55220	52821	42051	42058	24284	53132	94608	63891	65768	140490	104720	147590	107220	87900	88100	--	--
MWS0811	UPLC-MS/MS	130.09	84.08	-	-	129.079	C6H11NO2	[M+H]+	L-Pipecolic Acid	L-哌啶酸	Organic acids	有机酸	Organic acids	有机酸	3105-95-1	2	-	380970	1588700	406960	571310	153090	800010	611210	884640	1368700	1044900	1467200	925840	1485800	658470	268760	520780	325090	297510	1055000	123440	890570	1948200	594890	1777500	888570	1107100	1070500	C00408	ko00310,ko00960,ko01100,ko01110
ML10181668	UPLC-MS/MS	130.09	84.08	-	-	129.079	C6H11NO2	[M+H]+	Cycloleucine	环亮氨酸	Amino acids and derivatives	氨基酸及其衍生物	Amino acids and derivatives	氨基酸及其衍生物	52-52-8	3	-	49436	77806	105460	177220	180590	90835	105770	90630	103340	209800	285070	146170	75938	2635.8	47986	75328	90922	108220	78498	51461	61365	188140	183520	224390	72946	93376	106030	C03969	--
mws0425	UPLC-MS/MS	129.02	85	-	-	130.027	C5H6O4	[M-H]-	Citraconic acid	柠康酸	Organic acids	有机酸	Organic acids	有机酸	498-23-7	3	-	1781200	1604400	1959400	973270	780700	1597200	316760	445330	343780	862440	926290	920970	1523900	2146000	1168300	592000	760750	471590	360820	400370	226100	1270200	1220300	1057100	663450	816870	758520	C02226	ko00290,ko00660,ko01100,ko01210
Zmgn000217	UPLC-MS/MS	129.02	85.03	-	-	130.027	C5H6O4	[M-H]-	Methylenesuccinic acid	亚甲基琥珀酸	Organic acids	有机酸	Organic acids	有机酸	97-65-4	3	-	276560	185320	246970	120670	92539	196340	76719	76611	96743	200260	208480	149790	244760	306420	175700	83337	57656	77734	80473	124630	79227	322320	321650	260160	110020	182610	177380	C00490	ko00660,ko01100
pme2693	UPLC-MS/MS	131.12	114.09	-	-	130.111	C6H14N2O	[M+H]+	N-Acetylputrescine	N-乙酰腐胺	Alkaloids	生物碱	Phenolamine	酚胺	18233-70-0	3	-	15892	2561.5	16659	9169.7	12707	8410.4	60854	35896	24285	245830	194180	281150	8253.6	1675.8	979.15	4118.5	6091.6	9260.9	96154	39794	34168	81071	64672	94391	41995	38659	58543	C02714	ko00330,ko01100
mws0216	UPLC-MS/MS	132.07	86	-	-	131.058	C5H9NO3	[M+H]+	Trans-4-Hydroxy-L-proline	反-4-羟基-L-脯氨酸	Amino acids and derivatives	氨基酸及其衍生物	Amino acids and derivatives	氨基酸及其衍生物	51-35-4	3	-	2938900	3803800	8507400	4028600	4792900	6397000	2707000	1844400	2631500	11258000	10375000	17915000	3534400	1520700	2119500	2539500	4090700	3298900	3583200	3494300	2476600	14826000	16781000	17785000	6886600	5480500	3886800	C01157	ko00330,ko01100,ko02010
ML10197929	UPLC-MS/MS	130.09	88.04	-	-	131.069	C4H9N3O2	[M-H]-	Creatine	肌酸	Others	其它类	Others	其它	57-00-1	3	-	99006	96905	98201	206370	77686	91769	207510	53139	112970	78146	71091	170100	68049	61785	198690	29338	63456	57497	74412	251580	91018	82668	117340	117860	91737	131920	101370	C00300	ko00260,ko00330,ko01100
MWS1926	UPLC-MS/MS	132.1	86.1	-	-	131.095	C6H13NO2	[M+H]+	DL-Leucine	DL-亮氨酸	Amino acids and derivatives	氨基酸及其衍生物	Amino acids and derivatives	氨基酸及其衍生物	328-39-2	2	-	2380800	3352900	6731300	7653000	6883000	6810500	8344200	8190100	6414900	8109900	9527100	9638900	1649600	1404500	1528400	4968300	4681000	4964400	8781800	5883700	5587300	6987900	4880000	8086800	4614700	4425100	4961500	--	--
pme0274	UPLC-MS/MS	132.1	69	-	-	131.095	C6H13NO2	[M+H]+	6-Aminocaproic acid	6-氨基己酸	Organic acids	有机酸	Organic acids	有机酸	60-32-2	2	-	2041500	2102500	5354400	3434400	3323400	3598200	2128000	1930800	2166300	7432800	8091200	10582000	2801500	1073100	1514500	1720200	2352200	2048800	2099700	1545400	1549600	10743000	11690000	10176000	4258200	4017300	4286800	C02378	ko01100
mws1587	UPLC-MS/MS	132.1	86	-	-	131.095	C6H13NO2	[M+H]+	L-Norleucine	L-正亮氨酸	Amino acids and derivatives	氨基酸及其衍生物	Amino acids and derivatives	氨基酸及其衍生物	327-57-1	1	-	16429000	16620000	41484000	33074000	30813000	32420000	32934000	30555000	26465000	51810000	64257000	80118000	18101000	8629500	10848000	18137000	25156000	19309000	32844000	23597000	24938000	76120000	68264000	71675000	33917000	33598000	33310000	C01933	--
pme2679	UPLC-MS/MS	132	86	-	-	131.095	C6H13NO2	[M+H]+	L-Allo-isoleucine	L-别异亮氨酸	Amino acids and derivatives	氨基酸及其衍生物	Amino acids and derivatives	氨基酸及其衍生物	1509-34-8	3	-	2024600	2192700	4862200	3649000	3800100	3999000	2513900	3078800	2718900	7439500	7950700	10191000	2388900	1057700	1416400	1860300	2134500	2132600	2657600	908050	1669800	11747000	11646000	10413000	4244300	4572200	5037700	C21096	--
mws0227	UPLC-MS/MS	132.1	86.2	-	-	131.095	C6H13NO2	[M+H]+	L-Leucine	L-亮氨酸	Amino acids and derivatives	氨基酸及其衍生物	Amino acids and derivatives	氨基酸及其衍生物	61-90-5	1	-	16838000	15077000	40957000	33782000	30356000	32273000	32169000	30474000	25060000	51148000	64797000	77405000	17410000	8165900	10426000	17683000	24064000	18242000	31867000	22714000	24528000	75224000	69591000	71016000	34496000	32550000	33060000	C00123	ko00280,ko00290,ko00966,ko00970,ko01100,ko01110,ko01210,ko01230,ko02010
pmp001198	UPLC-MS/MS	132.1	57.1	-	-	131.095	C6H13NO2	[M+H]+	6-Deoxyfagomine	6-脱氧荞麦碱	Alkaloids	生物碱	Piperidine alkaloids	哌啶类生物碱	197449-09-5	1	-	2396700	2103900	6287400	3808300	3538800	3619100	3761900	2902800	2728100	8115400	9651800	11519000	2800400	1095200	1508300	1850100	3044600	2375600	3721700	3036800	3463300	11983000	11545000	12044000	4705000	5016400	4468900	--	--
mws0258	UPLC-MS/MS	132.1	86	-	-	131.095	C6H13NO2	[M+H]+	L-Isoleucine	L-异亮氨酸	Amino acids and derivatives	氨基酸及其衍生物	Amino acids and derivatives	氨基酸及其衍生物	73-32-5	1	-	15915000	15843000	40585000	32107000	31122000	31982000	31767000	29311000	25993000	51396000	64512000	76079000	17179000	7995900	10639000	17437000	22878000	17269000	31126000	21670000	24471000	73188000	67826000	70266000	33987000	32165000	32153000	C00407	ko00280,ko00290,ko00460,ko00960,ko00966,ko00970,ko01100,ko01110,ko01210,ko01230,ko02010
pme3034	UPLC-MS/MS	131.03	69.03	-	-	132.042	C5H8O4	[M-H]-	Ethylmalonic acid	乙基丙二酸	Organic acids	有机酸	Organic acids	有机酸	601-75-2	3	-	9	9	9	14414	9	9240.2	22614	13827	13732	27727	27292	20350	11553	9	28364	18710	80525	54936	32119	368360	50532	114850	180060	133720	51277	54695	43087	--	--
pme0243	UPLC-MS/MS	131.03	87.05	-	-	132.042	C5H8O4	[M-H]-	Glutaric acid	戊二酸	Organic acids	有机酸	Organic acids	有机酸	110-94-1	3	-	139570	178400	166890	271090	242810	315090	707930	359590	558390	543280	513800	531140	387030	303770	903440	512890	2139400	1209600	1007600	10193000	1560400	2804300	5247900	3835100	1144700	1407800	1534200	C00489	ko00071,ko00310,ko01100
Lmmn000806	UPLC-MS/MS	131.03	87.05	-	-	132.042	C5H8O4	[M-H]-	Dimethylmalonic acid	二甲基丙二酸	Organic acids	有机酸	Organic acids	有机酸	595-46-0	3	-	50843	32830	39615	18822	25407	27848	16745	43764	34253	282870	407910	353500	37945	29083	49800	13000	21726	10239	27337	27755	27208	228540	164590	233220	68331	76623	77476	--	--
mws0473	UPLC-MS/MS	131.03	87.05	-	-	132.042	C5H8O4	[M-H]-	2-Methylsuccinic acid	2-甲基丁二酸	Organic acids	有机酸	Organic acids	有机酸	498-21-5	3	-	411260	268130	396350	172160	230220	257670	282140	436450	378800	2796100	3921000	3497600	372740	329920	460350	144820	109470	137860	222480	251240	230510	2142700	1621700	2378900	663810	807960	858830	--	--
Lmgn000160	UPLC-MS/MS	131.05	70.03	-	-	132.053	C4H8N2O3	[M-H]-	3-Ureidopropionic Acid	3-脲基丙酸	Organic acids	有机酸	Organic acids	有机酸	462-88-4	3	-	464000	278540	1178500	86219	16122	148260	5154.1	5236.9	7569	28375	39403	131350	610900	99540	306450	14535	12152	14882	4849.8	1554.8	3299.6	41520	47598	52886	71903	92952	88586	C02642	ko00240,ko00410,ko00770,ko01100
mws0001	UPLC-MS/MS	133.06	74	-	-	132.054	C4H8N2O3	[M+H]+	L-Asparagine	L-天冬酰胺	Amino acids and derivatives	氨基酸及其衍生物	Amino acids and derivatives	氨基酸及其衍生物	70-47-3	1	-	10543000	7408900	10954000	4586500	1067200	6943800	167170	99901	431290	635390	625360	2891300	10029000	2760500	4634700	921140	712100	786060	105120	103860	90611	476330	626290	706360	2642800	2551900	2941500	C00152	ko00250,ko00460,ko00970,ko01100,ko01110,ko01230
mws0341	UPLC-MS/MS	131.07	85	-	-	132.079	C6H12O3	[M-H]-	2-Hydroxyisocaproic acid	2-羟基异己酸	Organic acids	有机酸	Organic acids	有机酸	20312-37-2	3	-	247380	198050	148430	221400	203150	74700	245000	255850	151440	485570	682160	253140	305480	363360	269630	214280	203310	177150	1097600	759660	1110700	368820	409920	325500	396480	427220	389340	C03264	--
Lmrn002746	UPLC-MS/MS	131.07	85.07	-	-	132.079	C6H12O3	[M-H]-	2-Hydroxy-4-methylpentanoic acid	2-羟基-4-甲基戊酸	Organic acids	有机酸	Organic acids	有机酸	498-36-2	3	-	174610	79242	51516	3335.5	9	3373.8	10677	9	7299.2	12028	9	6694.8	137710	123750	123220	9	11329	31113	74776	36015	67084	14680	25694	4091.7	40718	45472	22684	--	--
MWS1882	UPLC-MS/MS	132.03	88.04	-	-	133.038	C4H7NO4	[M-H]-	Iminodiacetic acid	亚氨基二乙酸	Organic acids	有机酸	Organic acids	有机酸	142-73-4	2	-	565660	910060	1022900	73980	51784	184590	67731	15520	102670	70137	92782	284370	958710	776690	1013400	168220	97663	211930	109630	57782	79331	319930	119080	226070	189520	216950	207770	C19911	--
mws0219	UPLC-MS/MS	132.03	88	-	-	133.038	C4H7NO4	[M-H]-	L-Aspartic Acid	L-天冬氨酸	Amino acids and derivatives	氨基酸及其衍生物	Amino acids and derivatives	氨基酸及其衍生物	56-84-8	2	-	4670600	6751000	7723700	509590	424250	1552700	586020	135980	775710	547810	750400	2226600	7542200	6455400	8389800	1233000	651210	1555200	930050	465990	621860	2407300	980970	1723800	1414100	1708300	1750700	C00049	ko00220,ko00250,ko00260,ko00261,ko00270,ko00300,ko00340,ko00410,ko00460,ko00710,ko00760,ko00770,ko00970,ko01100,ko01110,ko01200,ko01210,ko01230,ko01240,ko02010
MWS1709	UPLC-MS/MS	133.01	71.01	-	-	134.022	C4H6O5	[M-H]-	D-Malic acid	D-苹果酸	Organic acids	有机酸	Organic acids	有机酸	636-61-3	1	-	13789000	13789000	23486000	21269000	25350000	25253000	17966000	19085000	9639700	9540900	14474000	13233000	32564000	21521000	34202000	20810000	23733000	19012000	47275000	62770000	36049000	25484000	24557000	25496000	21419000	27589000	28908000	C00497	ko00650,ko01100
Lmbn000198	UPLC-MS/MS	133.01	71.01	-	-	134.022	C4H6O5	[M-H]-	3-Dehydro-L-Threonic Acid	3-脱氢-L-苏糖酸	Others	其它类	Saccharides and Alcohols	糖及醇类	-	1	-	13695000	14562000	26510000	19701000	23479000	24146000	22926000	19853000	12254000	10435000	14442000	13586000	33760000	20994000	33998000	21185000	24124000	20345000	46675000	61812000	35153000	24215000	23573000	24901000	21067000	27285000	28054000	C03064	ko00053,ko01100
mws0275	UPLC-MS/MS	133.01	71.01	-	-	134.022	C4H6O5	[M-H]-	L-Malic acid	L-苹果酸	Organic acids	有机酸	Organic acids	有机酸	97-67-6	1	-	3338600	3336000	4676200	5056400	5987200	6112600	4475500	3565400	2313000	2830600	3704300	2980400	8799300	5606000	8633800	5228300	6223800	4657500	12641000	17190000	8589100	6203000	6244200	6482600	5575200	7337200	7278800	C00149	ko00020,ko00620,ko00630,ko00710,ko01100,ko01110,ko01200
MWSmce701	UPLC-MS/MS	135.08	79.05	-	-	134.073	C9H10O	[M+H]+	4-Ethylbenzaldehyde	4-乙基苯甲醛	Others	其它类	Others	其它	4748-78-1	3	-	11951	13141	15953	111490	82896	137690	94647	86772	187930	140000	174870	326230	16959	24109	22034	69457	97235	82970	82244	114440	74107	83089	85093	75405	70126	67055	88029	--	--
Zmdp000972	UPLC-MS/MS	136.04	91.05	-	-	135.035	C4H9NO2S	[M+H]+	S-Methyl-L-cysteine	S-甲基-L-半胱氨酸	Amino acids and derivatives	氨基酸及其衍生物	Amino acids and derivatives	氨基酸及其衍生物	1187-84-4	2	-	405540	230110	780790	321440	306110	262390	352440	274270	271450	581390	514280	491620	303060	67075	479060	193830	243630	167080	428110	267740	359130	852500	706540	797990	403450	323540	355840	C22040	ko02010
pmb0374	UPLC-MS/MS	136.06	118.9	-	-	135.054	C5H5N5	[M+H]+	2-Aminopurine	2-氨基嘌呤	Nucleotides and derivatives	核苷酸及其衍生物	Nucleotides and derivatives	核苷酸及其衍生物	452-06-2	1	-	215510	193420	271710	297130	238460	317520	70899	213740	56712	454030	881950	376780	215210	247360	154140	244330	235860	213800	558430	548280	301590	694160	709600	587140	387110	304830	277210	--	--
pme0040	UPLC-MS/MS	136.06	119	-	-	135.054	C5H5N5	[M+H]+	Adenine	腺嘌呤	Nucleotides and derivatives	核苷酸及其衍生物	Nucleotides and derivatives	核苷酸及其衍生物	73-24-5	1	-	81603	142160	100770	468510	601080	384680	2388200	3292000	3232600	974920	435040	1717000	58062	118390	48603	111570	163810	835180	57892	62781	116200	174570	171630	325660	771500	933390	920840	C00147	ko00230,ko00908,ko01100
mws0889	UPLC-MS/MS	135.03	75.01	-	-	136.037	C4H8O5	[M-H]-	D-Threonic Acid	D-苏糖酸	Others	其它类	Saccharides and Alcohols	糖及醇类	3909-12-4	1	-	137950	107910	225280	740860	674180	594450	1857100	2050900	1308900	812390	947070	900940	299040	220960	493160	815610	1067300	1294600	4214700	3782300	3158900	2307700	2002400	1866000	1319700	1607300	1750000	C21649	--
pme1173	UPLC-MS/MS	137.05	110	-	-	136.039	C5H4N4O	[M+H]+	Allopurinol	别嘌呤醇	Nucleotides and derivatives	核苷酸及其衍生物	Nucleotides and derivatives	核苷酸及其衍生物	315-30-0	3	-	20297	17572	19957	17874	66513	11927	55691	101500	158240	61649	35879	81320	3716.1	5625.3	3661.2	7148.1	2469.8	9474.3	15201	8123.3	16158	43841	14676	23600	27731	34548	27046	--	--
pme0033	UPLC-MS/MS	137.05	119	-	-	136.039	C5H4N4O	[M+H]+	Hypoxanthine	次黄嘌呤	Nucleotides and derivatives	核苷酸及其衍生物	Nucleotides and derivatives	核苷酸及其衍生物	68-94-0	3	-	29111	14065	32224	17778	53713	24768	210190	141990	131620	89856	45320	77805	7919.7	5010.2	3211	13790	3748.4	9492.3	13393	12611	15970	73268	13123	20569	51855	46435	49914	C00262	ko00230,ko01100
mws0146	UPLC-MS/MS	138.06	78	-	-	137.048	C7H7NO2	[M+H]+	Nicotinic Acid Methyl Ester(Methyl Nicotinate)	烟酸甲酯	Alkaloids	生物碱	Alkaloids	生物碱	93-60-7	3	-	33673	12954	19176	33022	30111	6461	30449	14576	28699	35055	33659	35554	24592	11846	40923	60236	14116	59281	65511	16413	92820	61956	27298	95464	32734	32310	26378	C01004	ko00760
mws1336	UPLC-MS/MS	138.06	120	-	-	137.048	C7H7NO2	[M+H]+	4-Aminobenzoic acid	对氨基苯甲酸	Phenolic acids	酚酸类	Phenolic acids	酚酸类	150-13-0	3	-	9	9	9	9	9619.5	7041	41206	41401	61522	164660	90062	70535	9	9	9	9	9	9	4442	12689	18424	98121	84678	176190	37215	56808	46359	C00568	ko00790,ko01100,ko01240
pme1738	UPLC-MS/MS	138.08	95	-	-	137.071	C7H9N2O	[M+H]+	3-Carbamyl-1-methylpyridinium(1-Methylnicotinamide)	3-氨基甲酰-1-甲基氧化吡啶	Alkaloids	生物碱	Alkaloids	生物碱	1005-24-9	3	-	479270	409100	398370	133560	142030	177670	578390	528030	511180	506980	429170	411250	591660	559320	540800	127180	102480	162120	809830	626500	957730	468670	483310	529690	412630	518830	495480	C02918	ko00760,ko01100
pma0948	UPLC-MS/MS	138.09	121.1	-	-	137.084	C8H11NO	[M+H]+	Phenylethanolamine	苯基乙醇胺	Alkaloids	生物碱	Alkaloids	生物碱	7568-93-6	3	-	9	10066	117210	15698	43876	68697	142650	131370	160170	261560	54720	191800	9	9	9	18556	32180	20706	39830	97252	260190	77527	108960	88036	80532	68581	66606	C02735	--
pme1002	UPLC-MS/MS	138.09	103	-	-	137.084	C8H11NO	[M+H]+	L-Tyramine	L-酪胺	Amino acids and derivatives	氨基酸及其衍生物	Amino acids and derivatives	氨基酸及其衍生物	51-67-2	3	-	9	16969	424930	34198	93845	140300	50775	10222	52579	759380	91038	469520	9	9	9	36355	90672	47309	134450	295480	559000	235760	297930	193610	110340	137880	121880	C00483	ko00350,ko00950,ko01100,ko01110,ko01240
mws0749	UPLC-MS/MS	137.02	93	-	-	138.032	C7H6O3	[M-H]-	4-Hydroxybenzoic acid	4-羟基苯甲酸	Phenolic acids	酚酸类	Phenolic acids	酚酸类	99-96-7	3	-	135430	181570	308210	754290	534250	570150	809400	683830	668580	7378000	7347300	3380300	52692	42581	40053	248880	228850	262670	232240	340940	274890	723320	808130	470620	702510	1018900	1209600	C00156	ko00130,ko00790,ko01100,ko01110,ko01240
Lmgn001670	UPLC-MS/MS	137.03	108.02	-	-	138.032	C7H6O3	[M-H]-	Salicylic acid	水杨酸	Phenolic acids	酚酸类	Phenolic acids	酚酸类	69-72-7	3	-	79971	126800	131460	376310	521100	326440	1113900	1236800	634170	1085200	900450	696590	46893	65765	92313	218240	255540	282620	1225300	883310	964730	645700	876050	728620	457290	586660	592220	C00805	ko00360,ko01100,ko01110,ko04075
Lmbn001981	UPLC-MS/MS	137.02	93.03	-	-	138.032	C7H6O3	[M-H]-	2,5-Dihydroxybenzaldehyde	2,5-二羟基苯甲醛	Phenolic acids	酚酸类	Phenolic acids	酚酸类	1194-98-5	3	-	176140	291170	436750	814360	576010	769790	934210	804670	888140	8211000	8252500	3671500	175520	179020	123820	445410	313390	370130	384060	437560	318960	887620	1073000	654330	961740	1195600	1311400	C05585	ko00350,ko01100
Hmgn001653	UPLC-MS/MS	137.02	93.04	-	-	138.032	C7H6O3	[M-H]-	Protocatechualdehyde	原儿茶醛	Phenolic acids	酚酸类	Phenolic acids	酚酸类	139-85-5	3	-	159010	282100	411020	929070	714370	881400	947270	818750	856760	7821800	8448600	3809400	196330	195390	131590	403750	375620	319010	327700	415440	281510	973360	1026000	617170	1016600	1376200	1177500	C16700	ko00950
mws0336	UPLC-MS/MS	137.04	93.05	-	-	138.043	C6H6N2O2	[M-H]-	Urocanic acid	尿刊酸	Organic acids	有机酸	Organic acids	有机酸	104-98-3	2	-	1334	4267.8	1746	31337	8768.5	28594	286180	193090	328090	141810	85172	87211	1342.4	5439.9	2041.8	16126	3793.6	2006.8	30849	70236	116550	5244.9	7341.2	42680	35204	16924	42122	C00785	ko00340,ko01100
mws2368	UPLC-MS/MS	137.06	119.05	-	-	138.068	C8H10O2	[M-H]-	Tyrosol	酪醇	Phenolic acids	酚酸类	Phenolic acids	酚酸类	501-94-0	3	-	5038.5	10049	7276	26839	47584	33600	93328	129120	53850	98051	103910	69738	1655.8	8964.8	2225.2	31937	27974	27073	123320	61908	116530	68776	104280	74960	37158	56990	67616	C06044	ko00350,ko01100
Hmbn004041	UPLC-MS/MS	137.1	136.86	-	-	138.105	C9H14O	[M-H]-	2-Pentylfuran	2-戊基呋喃	Others	其它类	Others	其它	3777-69-3	3	-	9	9	9	118120	65924	130050	25072	9	9	103860	42490	119970	9	9	9	9	9	9	9	9	9	9	9	9	79767	74858	74183	--	--
pme2828	UPLC-MS/MS	140	99	-	-	139.027	C6H5NO3	[M+H]+	4-Nitrophenol	4-硝基苯酚	Phenolic acids	酚酸类	Phenolic acids	酚酸类	100-02-7	3	-	1299800	1211000	1163800	4060300	4135600	3647600	12376000	10838000	8600500	3732700	4786500	3851700	1090600	1125600	2087600	4121200	6281500	4760400	8425200	14071000	9002700	5039900	4360200	5577800	6612900	6218200	7008800	C00870	--
pma2987	UPLC-MS/MS	142.1	124.09	-	-	141.09	C6H11N3O	[M+H]+	Histidinol	组氨醇	Alkaloids	生物碱	Alkaloids	生物碱	501-28-0	3	-	14853000	14485000	15829000	9311100	9300700	10504000	14943000	16992000	15774000	14967000	16041000	13820000	16353000	18341000	15896000	9331800	8855700	8433000	18786000	16341000	19451000	16709000	16534000	15812000	13749000	14816000	16177000	C00860	ko00340,ko01100,ko01110,ko01230
pme3207	UPLC-MS/MS	141.02	59	-	-	142.027	C6H6O4	[M-H]-	Muconic acid	己二烯二酸	Organic acids	有机酸	Organic acids	有机酸	1119-72-8	3	-	5538700	6027200	5657700	1232400	1545700	1844700	808970	922550	1112600	975260	994600	1114900	6688400	8360400	6546600	2911200	2428800	2363100	1026800	1044100	1084500	997740	1114600	1072600	1836300	2415000	2546400	C02480	ko01100
pmb0764	UPLC-MS/MS	144.05	113.2	-	-	143.04	C6H9NOS	[M+H]+	4-Methyl-5-thiazoleethanol	4-甲基-5-噻唑乙醇	Others	其它类	Others	其它	137-00-8	3	-	62030	26078	47688	30244	41406	28569	23517	52622	58668	41235	45508	171090	26915	16977	32554	4399.5	14843	11960	31296	22014	34360	19110	27615	35094	35604	31032	29582	C04294	ko00730,ko01100,ko01240
Hmsp000364	UPLC-MS/MS	144.1	98.09	-	-	143.095	C7H13NO2	[M+H]+	L-Cyclopentylglycine	环戊基甘氨酸	Amino acids and derivatives	氨基酸及其衍生物	Amino acids and derivatives	氨基酸及其衍生物	2521-84-8	2	-	254930	275080	184970	884240	625810	656730	638140	1149800	1235500	4633100	4479100	4013200	826740	496770	513020	1275300	1254700	2538900	2111500	1338700	1242600	10176000	6792600	10820000	2802700	2781100	2856100	--	--
pmp000966	UPLC-MS/MS	144.1	84.1	-	-	143.095	C7H13NO2	[M+H]+	Stachydrine	水苏碱	Alkaloids	生物碱	Pyrrole alkaloids	吡咯类生物碱	471-87-4	3	-	86194	94712	109420	313090	2162000	191570	561670	316650	429020	290980	149810	397400	313740	163210	158530	502620	173270	339790	525590	228310	460980	643790	247770	445600	398860	327450	412100	C10172	--
Rfmb320	UPLC-MS/MS	144.1	84.08	-	-	143.095	C7H13NO2	[M+H]+	1-Methylpiperidine-2-carboxylic acid	1-甲基哌啶-2-羧酸	Amino acids and derivatives	氨基酸及其衍生物	Amino acids and derivatives	氨基酸及其衍生物	7730-87-2	3	-	105560	101850	50849	282400	2054000	154460	716800	288960	296910	382160	245610	520130	313430	130450	131280	544080	148630	455780	599530	154310	353330	567460	230780	411850	359000	403470	412430	--	--
Rfmb318	UPLC-MS/MS	144.1	84.08	-	-	144.092	C7H14NO2+	[M]+	D-Proline betaine	脯氨酸甜菜碱	Amino acids and derivatives	氨基酸及其衍生物	Amino acids and derivatives	氨基酸及其衍生物	1195-94-4	3	-	26318	28686	24312	167720	1030400	76599	372510	164020	85986	123670	115610	217700	146830	35383	56647	251740	72067	165390	260240	45499	190390	317510	45932	113490	106720	181230	182180	C21514	--
pme0295	UPLC-MS/MS	146.08	86	-	-	145.074	C6H11NO3	[M+H]+	4-Acetamidobutyric acid	4-乙酰氨基丁酸	Organic acids	有机酸	Organic acids	有机酸	3025-96-5	3	-	112000	56633	83386	140090	421950	197290	4590800	1343400	2175400	799870	675680	657180	117270	87817	83960	100820	148900	114340	575450	1330500	844790	746920	1108800	752970	460620	495870	431690	C02946	ko00330,ko01100
pme3351	UPLC-MS/MS	144.1	126	-	-	145.074	C6H11NO3	[M-H]-	Allysine(6-Oxo DL-Norleucine)	烯丙酯	Others	其它类	Others	其它	1962-83-0	3	-	9885.5	9	7591	114860	70142	129490	268290	200280	264700	113660	90377	153790	15978	18070	11392	67971	73247	77991	199170	239580	180530	93896	183920	114660	114380	152390	136670	C04076	ko00300,ko00310,ko00960,ko01100,ko01110,ko01230
mws0567	UPLC-MS/MS	146.09	87	-	-	145.085	C5H11N3O2	[M+H]+	4-Guanidinobutyric acid	4-胍基丁酸	Organic acids	有机酸	Organic acids	有机酸	463-00-3	3	-	12062000	7956500	5238400	4287600	3711000	2565300	4700500	4151000	3305000	1858300	1576500	1893200	7963100	5124000	9543700	9275700	10709000	15743000	5633400	5782200	5948900	2035600	1998300	4225100	5269500	4524500	5572800	C01035	ko00330,ko01100
pme2380	UPLC-MS/MS	145.01	101	-	-	146.022	C5H6O5	[M-H]-	α-Ketoglutaric acid	α-酮戊二酸	Organic acids	有机酸	Organic acids	有机酸	328-50-7	3	-	193400	425170	425290	374850	727940	425570	121700	542860	197640	201810	198840	250050	633910	686210	571440	619420	465050	581720	332810	246310	303010	359270	227720	301140	293670	335610	347210	C00026	ko00020,ko00040,ko00053,ko00220,ko00250,ko00300,ko00310,ko00340,ko00430,ko00630,ko00650,ko00660,ko01100,ko01110,ko01200,ko01210,ko01230,ko01240
mws0924	UPLC-MS/MS	145.05	101	-	-	146.058	C6H10O4	[M-H]-	2-Methylglutaric acid	2-甲基戊二酸	Organic acids	有机酸	Organic acids	有机酸	617-62-9	3	-	412200	336080	302890	66637	135340	148640	12003	99605	19054	261560	561960	295570	615390	676020	538990	241280	169970	156940	85731	33139	24125	338170	180490	349380	190850	223220	262370	--	--
mws0208	UPLC-MS/MS	145.05	101	-	-	146.058	C6H10O4	[M-H]-	Adipic Acid	己二酸	Organic acids	有机酸	Organic acids	有机酸	124-04-9	3	-	487340	402790	324800	103150	189280	174450	74169	153560	65373	237950	753080	349080	642650	808920	683720	216710	221000	202920	98233	52441	71957	329670	365150	372110	234830	311890	304580	C06104	ko01100
Wmzn000227	UPLC-MS/MS	145.06	109.04	-	-	146.058	C6H10O4	[M-H]-	2,2-Dimethylsuccinic acid	2,2-二甲基琥珀酸	Organic acids	有机酸	Organic acids	有机酸	597-43-3	1	-	197930	112290	223500	83000	37247	115840	14078	5326.9	17149	74200	49594	243890	184320	67567	115930	43366	55771	66141	13856	7293.6	10981	71729	66685	66353	53367	56677	63225	--	--
pme0193	UPLC-MS/MS	147.08	84	-	-	146.069	C5H10N2O3	[M+H]+	L-Glutamine	L-谷氨酰胺	Amino acids and derivatives	氨基酸及其衍生物	Amino acids and derivatives	氨基酸及其衍生物	56-85-9	1	-	932340	1652700	1936000	2924100	3089300	1933400	2323200	1725100	1968700	4447200	5253000	2291500	972220	61145	708490	1715600	1792600	1643200	1718000	1573900	1405300	3951400	4253100	4601200	1829100	2036100	2394400	C00064	ko00220,ko00230,ko00240,ko00250,ko00630,ko00750,ko00910,ko00970,ko01100,ko01230,ko01240,ko02010
pme0026	UPLC-MS/MS	147.11	84	-	-	146.106	C6H14N2O2	[M+H]+	L-Lysine	L-赖氨酸	Amino acids and derivatives	氨基酸及其衍生物	Amino acids and derivatives	氨基酸及其衍生物	56-87-1	3	-	1193500	1809100	4339900	3630600	3970100	2335100	2673800	2030600	2374600	5317300	6271800	6244400	1485400	65773	771960	2166000	2277700	2346100	2084000	1873900	1463800	4691600	4924300	5594500	2405300	2603800	3001100	C00047	ko00300,ko00310,ko00780,ko00960,ko00970,ko01100,ko01110,ko01210,ko01230,ko02010
mws1050	UPLC-MS/MS	148.06	88	-	-	147.053	C5H9NO4	[M+H]+	O-Acetylserine	O-乙酰丝氨酸	Amino acids and derivatives	氨基酸及其衍生物	Amino acids and derivatives	氨基酸及其衍生物	5147-00-2	3	-	466460	332030	414060	718600	665630	471680	380470	282590	236570	829630	683520	852320	207550	209040	210200	237300	281030	264850	165590	181870	113950	336370	555360	313330	487670	537000	399480	C00979	ko00270,ko00908,ko00920,ko01100,ko01110,ko01200,ko01230,ko04122
Zmzn000113	UPLC-MS/MS	146.05	102.06	-	-	147.053	C5H9NO4	[M-H]-	L-threo-3-Methylaspartate	L-苏式-3-甲基天冬氨酸	Amino acids and derivatives	氨基酸及其衍生物	Amino acids and derivatives	氨基酸及其衍生物	6061-13-8	3	-	1530900	1848500	1634900	44222	156320	91392	66441	109590	145930	146440	172160	205100	1366900	1058400	1618000	149950	90908	230160	168360	77165	183600	270910	155690	320950	286590	352160	347520	C03618	ko00630,ko00660,ko01100,ko01200
pme0014	UPLC-MS/MS	148.06	84	-	-	147.053	C5H9NO4	[M+H]+	L-Glutamic acid	L-谷氨酸	Amino acids and derivatives	氨基酸及其衍生物	Amino acids and derivatives	氨基酸及其衍生物	56-86-0	1	-	53555000	64384000	28346000	5337800	10685000	7640200	2671200	6664300	6266300	3904600	4094500	9267400	44253000	53660000	51095000	13496000	9042900	18887000	4871000	3547400	4091600	5594200	3823900	7440200	16900000	14906000	14982000	C00025	ko00220,ko00250,ko00330,ko00332,ko00340,ko00430,ko00480,ko00524,ko00630,ko00650,ko00660,ko00860,ko00910,ko00970,ko01100,ko01110,ko01200,ko01210,ko01230,ko01240,ko02010
pmp001285	UPLC-MS/MS	149.02	65.04	-	-	148.016	C8H4O3	[M+H]+	Phthalic anhydride	邻苯二甲酸酐	Phenolic acids	酚酸类	Phenolic acids	酚酸类	85-44-9	1	-	143330	167720	211430	127830	161360	119650	137400	149680	153840	149390	130860	167090	80873	113810	92447	123190	151470	180910	262010	349780	204320	249620	215140	244420	129220	136850	113330	--	--
MWS3036	UPLC-MS/MS	147.03	85.03	-	-	148.037	C5H8O5	[M-H]-	3-Hydroxyglutaric acid	3-羟基戊二酸	Organic acids	有机酸	Organic acids	有机酸	638-18-6	2	-	14261	12313	37630	53008	35342	83848	83146	107550	61457	164920	148880	227590	25154	31326	22268	49309	124980	87778	61766	135520	95844	221640	307880	318320	114680	176900	158010	--	--
Zmyn000247	UPLC-MS/MS	147.03	57.03	-	-	148.037	C5H8O5	[M-H]-	2-Hydroxyglutaric Acid	2-羟基戊二酸	Organic acids	有机酸	Organic acids	有机酸	13095-48-2	1	-	151480	119900	214920	100290	84525	157850	446020	369070	382450	584940	581300	588930	183310	178570	199550	133500	89393	167090	749940	1214200	959990	1107500	1320000	1154400	362540	510200	514580	C03196	ko00310,ko01100
Lmbn000216	UPLC-MS/MS	147.03	57.03	-	-	148.037	C5H8O5	[M-H]-	3-Methylmalic acid	3-甲基苹果酸	Organic acids	有机酸	Organic acids	有机酸	152204-30-3	2	-	136560	150030	213110	109790	87740	217440	501260	325570	349170	570820	660250	590330	204750	191630	200060	143090	140250	202710	845060	1147300	1028400	1192000	1207400	1382800	469630	480680	524010	C06032	ko00290,ko00660,ko01100,ko01210,ko01230
pmb2826	UPLC-MS/MS	147.03	87.1	-	-	148.037	C5H8O5	[M-H]-	L-Citramalic acid	2-甲基苹果酸	Organic acids	有机酸	Organic acids	有机酸	6236-09-5	1	-	104930	106710	231390	81660	92961	233980	852830	566500	723840	1180300	1106000	1057900	176180	145400	165800	142240	230410	211080	1415200	2188900	1972400	1903800	2736500	2525500	604840	903450	798830	C02614	ko00660,ko01100
Zmyn000230	UPLC-MS/MS	147.03	57.03	-	-	148.037	C5H8O5	[M-H]-	2-Dehydro-3-deoxy-L-arabinonate	2-脱氢-3-脱氧-L-阿拉伯糖	Others	其它类	Saccharides and Alcohols	糖及醇类	-	1	-	286720	263590	361470	154350	146250	382620	273450	302170	362480	511050	481050	512020	342660	420120	333450	168360	153300	136720	505750	668100	598570	995790	1097700	943050	356510	516600	569630	C00684	ko00053,ko01100
ML10171848	UPLC-MS/MS	147.03	85.03	-	-	148.037	C5H8O5	[M-H]-	D-Arabinono-1,4-lactone	D-阿拉伯-1,4-内酯	Others	其它类	Saccharides and Alcohols	糖及醇类	2782-09-4	2	-	8050.8	8485.9	28034	26050	15806	70452	83213	90052	70861	174780	150320	184080	29386	11927	19727	54804	135470	69532	132720	257190	180190	208100	292940	258000	99968	150230	145290	C00652	ko00053
mws2213	UPLC-MS/MS	147.05	77.01	-	-	148.052	C9H8O2	[M-H]-	Cinnamic acid	肉桂酸	Phenolic acids	酚酸类	Phenolic acids	酚酸类	140-10-3	3	-	3708	7143.9	161340	68287	34292	7323.5	6605.3	6485.3	12125	37931	15419	29314	2614.9	546.32	1230.7	35318	85899	20683	3021.5	955.91	17887	16300	14462	20330	14547	18491	19712	C00423	ko00130,ko00360,ko00940,ko00998,ko01100,ko01110
Lmgp000796	UPLC-MS/MS	150.06	61.01	-	-	149.048	C8H7NO2	[M+H]+	4-Hydroxymandelonitrile	4-羟基扁桃腈	Alkaloids	生物碱	Phenolamine	酚胺	13093-65-7	1	-	3674700	2407600	8664900	2167400	2207600	2685700	1989400	1808800	1526500	1463600	1307000	6072200	2594300	866960	898990	2466600	2932100	2771300	4662900	3006900	4042600	15684000	8343500	11889000	1554300	1264000	1413100	C00650	--
pme1210	UPLC-MS/MS	150.06	61	-	-	149.051	C5H11NO2S	[M+H]+	L-Methionine	L-甲硫氨酸	Amino acids and derivatives	氨基酸及其衍生物	Amino acids and derivatives	氨基酸及其衍生物	63-68-3	1	-	3386100	1973100	7693300	1658000	2102100	2099700	1595300	1661000	1511400	1594000	1135600	5609200	2289500	774100	699560	1971700	2508400	2540100	3915300	2768600	3368600	13199000	7067900	9362900	1390300	1296300	1264500	C00073	ko00270,ko00966,ko00970,ko01100,ko01110,ko01210,ko01230,ko01240
mws0847	UPLC-MS/MS	150.08	133	-	-	149.07	C6H7N5	[M+H]+	1-Methyladenine	1-甲基腺嘌呤	Nucleotides and derivatives	核苷酸及其衍生物	Nucleotides and derivatives	核苷酸及其衍生物	5142-22-3	3	-	68061	40446	154340	37765	40413	40452	13613	20111	20549	21012	28979	95074	37868	20278	17623	43101	49886	55931	80306	52111	46727	287110	108000	142320	29136	23131	20047	C02216	--
MWSmce199	UPLC-MS/MS	149.05	59.02	-	-	150.053	C5H10O5	[M-H]-	L-Xylose	L-木糖	Others	其它类	Saccharides and Alcohols	糖及醇类	609-06-3	2	-	149700	124300	77176	151630	136800	182960	291780	418680	355110	522790	541430	402710	185020	152730	317050	177430	113840	175490	668830	421050	711840	631800	502450	644890	246390	330870	362390	C01510	--
MWSmce682	UPLC-MS/MS	149.05	59.01	-	-	150.053	C5H10O5	[M-H]-	DL-Xylose	DL-木糖	Others	其它类	Saccharides and Alcohols	糖及醇类	25990-60-7	2	-	121280	113190	73085	105520	126900	188470	366180	441240	317520	522200	518330	458270	137930	129200	266970	177600	99504	170380	612030	328420	723940	549890	503170	572130	271100	290900	319500	--	--
Zmgn000173	UPLC-MS/MS	149.05	75.01	-	-	150.053	C5H10O5	[M-H]-	D-Ribose	D-核糖	Others	其它类	Saccharides and Alcohols	糖及醇类	50-69-1	1	-	13442	7534.5	16613	101950	59437	140700	455400	622390	427560	814110	1092000	582210	9046.3	4344.6	9694.9	39519	66410	63786	563510	472600	683030	842800	796070	754990	220060	262280	252960	C00121	ko00030,ko01100,ko02010
mws1499	UPLC-MS/MS	149.05	59.01	-	-	150.053	C5H10O5	[M-H]-	D-Arabinose	D-阿拉伯糖	Others	其它类	Saccharides and Alcohols	糖及醇类	10323-20-3	2	-	99775	120750	71139	121830	136580	138240	306990	377220	320760	427160	568920	396180	122700	128580	292310	170910	89995	192640	620330	325990	749540	527480	438640	597750	233580	282590	292000	C00216	ko00040,ko00053
Lmxp001668	UPLC-MS/MS	151.08	91.05	-	-	150.068	C9H10O2	[M+H]+	2-Methoxy-4-ethenylphenol	2-甲氧基-4-乙烯基苯酚	Phenolic acids	酚酸类	Phenolic acids	酚酸类	7786-61-0	3	-	40692	42247	44653	15627	15845	21790	27690	31629	58593	42361	19887	23367	47775	39017	39270	48591	52423	54991	95891	64762	84855	50878	25233	58248	26613	25331	39186	C17883	--
Lmxn006423	UPLC-MS/MS	150	122.01	-	-	151.009	C7H5NOS	[M-H]-	2(3H)-Benzothiazolone	2-羟基苯并噻唑	Alkaloids	生物碱	Alkaloids	生物碱	934-34-9	3	-	11613	11403	14541	9628.5	16191	14630	4693.5	7881.1	13099	2560	5415.4	5111.6	10203	17770	10306	13017	10625	21302	8030.1	22535	14813	12396	11754	24402	6489.7	3515.8	8831.7	--	--
pme0183	UPLC-MS/MS	152.06	135	-	-	151.049	C5H5N5O	[M+H]+	Isoguanine	异鸟嘌呤	Nucleotides and derivatives	核苷酸及其衍生物	Nucleotides and derivatives	核苷酸及其衍生物	3373-53-3	3	-	143230	65342	172850	108400	158400	140910	226960	173270	194400	137680	165550	329380	58306	45965	43268	196230	94309	149040	183630	146780	99924	366480	280000	255850	115760	117590	162450	--	--
pme1109	UPLC-MS/MS	152.06	135	-	-	151.049	C5H5N5O	[M+H]+	Guanine	鸟嘌呤	Nucleotides and derivatives	核苷酸及其衍生物	Nucleotides and derivatives	核苷酸及其衍生物	73-40-5	2	-	69658	41834	75193	138980	55627	87728	259460	97503	274110	231860	104430	525220	40255	35594	34000	300470	90285	101350	195540	153090	176970	255580	76665	187910	136130	141480	128240	C00242	ko00230,ko01100
pme0256	UPLC-MS/MS	151.03	151	-	-	152.033	C5H4N4O2	[M-H]-	Xanthine	黄嘌呤	Nucleotides and derivatives	核苷酸及其衍生物	Nucleotides and derivatives	核苷酸及其衍生物	69-89-6	3	-	57433	51985	43121	90373	126660	15371	63351	63064	37182	65499	107850	108150	87953	37210	66970	91600	91349	93848	20559	54885	113500	55779	58491	126500	52968	131120	127860	C00385	ko00230,ko00232,ko01100,ko01110
MWS2984	UPLC-MS/MS	153.05	136.03	-	-	152.045	C4H4N6O	[M+H]+	8-Azaguanine	8-氮鸟嘌呤	Nucleotides and derivatives	核苷酸及其衍生物	Nucleotides and derivatives	核苷酸及其衍生物	134-58-7	3	-	43095	9547.2	11454	17564	33447	13863	25705	8515.1	28709	37110	42715	65759	13747	6539.3	7965.1	27893	15536	18683	21374	24099	14147	43782	24323	44174	29696	25873	19964	--	--
MWSmce040	UPLC-MS/MS	153.05	65.04	-	-	152.047	C8H8O3	[M+H]+	Isovanillin	异香草醛	Phenolic acids	酚酸类	Phenolic acids	酚酸类	621-59-0	3	-	510260	392170	648040	367650	476680	448590	338100	363010	771970	489730	234180	624430	279700	249500	328780	425280	447800	507150	588560	475190	488930	679640	481050	452920	422760	423200	454000	--	--
mws0458	UPLC-MS/MS	151.04	136	-	-	152.047	C8H8O3	[M-H]-	Vanillin	香草醛	Phenolic acids	酚酸类	Phenolic acids	酚酸类	121-33-5	3	-	2265000	1308400	2869700	1271200	1276800	1886500	953720	1012400	2109500	896790	500360	2189300	1455000	1187800	1177400	1856200	1885200	1398900	1466000	1285800	1022800	1605900	1181500	1276700	1119800	1248100	1296600	C00755	ko00998,ko01100,ko01110
mws0943	UPLC-MS/MS	151.05	71.01	-	-	152.059	C7H8N2O2	[M-H]-	1,4-Dihydro-1-Methyl-4-oxo-3-pyridinecarboxamide	1,4-二氢-1-甲基-4-氧代-3-吡啶甲酰胺	Alkaloids	生物碱	Pyridine alkaloids	吡啶类生物碱	769-49-3	1	-	18750000	18548000	19063000	10954000	9485300	13614000	26972000	22353000	23009000	19217000	16126000	15480000	23954000	26244000	27574000	7016900	8869700	9732500	22969000	17682000	21396000	18473000	18871000	20601000	15950000	18131000	19658000	C05843	ko00760,ko01100
mws0438	UPLC-MS/MS	151.06	59	-	-	152.068	C5H12O5	[M-H]-	L-Arabitol	L-阿拉伯糖醇	Others	其它类	Saccharides and Alcohols	糖及醇类	7643-75-6	1	-	25869000	27043000	21581000	13285000	13518000	17894000	31592000	27361000	31322000	23995000	21654000	19715000	32321000	33124000	37195000	9762700	10552000	15292000	28173000	27305000	27092000	27688000	27821000	28830000	22141000	24984000	25248000	C00532	ko00040,ko01100
mws0213	UPLC-MS/MS	151.06	71	-	-	152.068	C5H12O5	[M-H]-	Ribitol	阿东糖醇	Others	其它类	Saccharides and Alcohols	糖及醇类	488-81-3	1	-	15160000	16754000	13728000	8283800	7620900	13965000	21138000	19057000	20147000	15642000	14116000	12698000	24440000	19952000	22777000	5907300	7028000	8802700	18794000	13892000	15494000	15879000	15930000	16605000	13322000	15518000	16720000	C00474	ko00040,ko00740,ko01100
pme0513	UPLC-MS/MS	151.06	59	-	-	152.068	C5H12O5	[M-H]-	Xylitol	木糖醇	Others	其它类	Saccharides and Alcohols	糖及醇类	87-99-0	1	-	14390000	17245000	13919000	7692000	8605300	11867000	18843000	17415000	18979000	14974000	12826000	12690000	20306000	23170000	25911000	5545300	6030600	9763000	17039000	16837000	17777000	15545000	16258000	16750000	12936000	15199000	15551000	C00379	ko00040,ko01100,ko02010
mws0437	UPLC-MS/MS	151.06	71	-	-	152.068	C5H12O5	[M-H]-	D-Arabitol	D-阿拉伯糖醇	Others	其它类	Saccharides and Alcohols	糖及醇类	488-82-4	1	-	17074000	16902000	13196000	7903100	6751500	12229000	20298000	15938000	19530000	15883000	13109000	11846000	26647000	19561000	30707000	5427400	6895700	7499400	17589000	17184000	15729000	18335000	17573000	16983000	12489000	17210000	15743000	C01904	ko00040,ko01100
MWS1962	UPLC-MS/MS	153.13	83.05	-	-	152.12	C10H16O	[M+H]+	cis-Citral	柠檬醛	Others	其它类	Others	其它	5392-40-5	3	-	192730	158650	217890	45371	33464	62065	332120	327610	222870	204630	218000	200000	261330	246010	177700	49655	43079	41651	475000	345980	474340	278670	224760	284830	199640	231450	197300	C09847	ko01110
mws0183	UPLC-MS/MS	153.02	109.03	-	-	154.027	C7H6O4	[M-H]-	3,4-Dihydroxybenzoic acid (Protocatechuic acid)	3,4-二羟基苯甲酸; 原儿茶酸	Phenolic acids	酚酸类	Phenolic acids	酚酸类	99-50-3	3	-	67078	80597	88344	678950	732030	405820	794150	889100	572970	6223600	7481300	2543500	127370	221510	88672	330100	339560	432760	708330	575680	527540	891380	798380	783480	884120	1090400	1023000	C00230	ko01100,ko01110
mws0180	UPLC-MS/MS	153.02	109.03	-	-	154.027	C7H6O4	[M-H]-	2,5-Dihydroxybenzoic acid; Gentisic Acid	2,5-二羟基苯甲酸; 龙胆酸	Phenolic acids	酚酸类	Phenolic acids	酚酸类	490-79-9	3	-	28644	59690	43738	276730	293420	138850	311630	381040	257550	2678100	3475200	1113500	58197	85198	32725	126050	134590	174710	306350	249790	193010	328400	342200	328560	364510	492920	498850	C00628	ko00350,ko01100
mws0639	UPLC-MS/MS	153.02	109.03	-	-	154.027	C7H6O4	[M-H]-	2,3-Dihydroxybenzoic Acid	2,3-二羟基苯甲酸	Organic acids	有机酸	Organic acids	有机酸	303-38-8	3	-	57054	93791	60295	558370	568070	290080	649720	758200	570320	5599600	7034900	2052800	107410	169050	74020	298000	257810	278400	611440	476820	416570	741820	661030	695130	695940	975430	863870	C00196	ko01110
mws0254	UPLC-MS/MS	156.08	110	-	-	155.069	C6H9N3O2	[M+H]+	L-Histidine	L-组氨酸	Amino acids and derivatives	氨基酸及其衍生物	Amino acids and derivatives	氨基酸及其衍生物	71-00-1	3	-	1421000	2424500	5838600	360870	340850	274820	63804	67365	61741	429590	583780	693250	2387700	62815	2071800	476310	610140	623540	93029	73618	55685	629560	662560	999690	651440	675300	724900	C00135	ko00340,ko00410,ko00970,ko01100,ko01110,ko01230,ko02010
pme2589	UPLC-MS/MS	159.1	87	-	-	160.037	C6H8O5	[M-H]-	2-Oxoadipic acid	2-氧代己二酸	Organic acids	有机酸	Organic acids	有机酸	3184-35-8	3	-	9	9	9	9	9	9	9	9	9	9	42543	9	110040	33682	179100	773760	3328700	1187500	223390	1398800	295040	279130	774710	294760	280300	305480	283700	C00322	ko00300,ko00310,ko00380,ko01100,ko01110,ko01210,ko01230,ko01240
mws1417	UPLC-MS/MS	160.04	116	-	-	161.048	C9H7NO2	[M-H]-	Indole-3-carboxylic acid	吲哚-3-甲酸	Alkaloids	生物碱	Plumerane	吲哚类生物碱	771-50-6	3	-	12754	2296.7	14942	38839	60325	30217	93391	23425	61948	132370	64294	247270	5950.8	10723	15866	6109	11724	19088	71080	23686	34283	10390000	1387000	7160800	556850	621580	632190	C19837	--
mws0102	UPLC-MS/MS	160.04	116	-	-	161.048	C9H7NO2	[M-H]-	Indole-5-carboxylic acid	吲哚-5-甲酸	Alkaloids	生物碱	Plumerane	吲哚类生物碱	1670-81-1	3	-	1850.2	3747.8	11061	14531	14282	18035	42607	9350.2	27420	36874	23675	88454	4408.8	1160.1	6855	6895.5	4319.8	2441.2	30792	13436	13343	4706200	596530	3345600	237730	276800	270690	--	--
mws1346	UPLC-MS/MS	162.08	98	-	-	161.069	C6H11NO4	[M+H]+	DL-2-Aminoadipic acid	DL-2-氨基己二酸	Alkaloids	生物碱	Alkaloids	生物碱	542-32-5	3	-	125700	129220	147780	540080	577880	291340	113820	136090	102480	339770	481960	693040	3036400	1844200	2916700	3362700	6698800	6409700	396150	973810	302860	898990	1227400	1394200	986250	974280	871930	C00956	ko00300,ko00310,ko00311,ko01100,ko01110,ko01210,ko01230
pme3382	UPLC-MS/MS	160.06	98	-	-	161.069	C6H11NO4	[M-H]-	N-Acetyl-L-threonine	N-乙酰-L-苏氨酸	Amino acids and derivatives	氨基酸及其衍生物	Amino acids and derivatives	氨基酸及其衍生物	17093-74-2	3	-	26908	44638	36232	81154	75990	61817	90811	129230	80938	89860	96442	152140	70877	37348	71311	79566	71397	89813	38861	57861	39426	49554	51665	94951	48882	72576	55082	--	--
Lmcp000282	UPLC-MS/MS	162.11	85.03	-	-	161.105	C7H15NO3	[M+H]+	L-Carnitine	左旋肉碱	Alkaloids	生物碱	Alkaloids	生物碱	541-15-1	1	-	3003200	2750300	4142300	561120	551900	1143800	4752000	5145800	5760800	5706200	7164300	4834100	3870300	4245300	3014000	4711000	4405200	5143900	8022900	5067100	11175000	7085400	6000900	6813600	3217400	4633900	4803600	C00318	--
Hmqn002118	UPLC-MS/MS	161.02	133.03	-	-	162.032	C9H6O3	[M-H]-	Umbelliferone	伞形酮	Lignans and Coumarins	木脂素和香豆素	Coumarins	香豆素	93-35-6	2	-	776360	1438700	535920	1366800	4098300	588490	996870	1538800	964530	2103200	1834400	596360	36517	15071	291560	323800	216530	433540	633340	161010	1591000	920110	2376900	1406200	983370	1193200	1150800	C09315	ko00940,ko01110
MWS0559	UPLC-MS/MS	161.05	71.01	-	-	162.053	C6H10O5	[M-H]-	1,6-anhydro-β-D-glucose	1,6-脱水-β-D-葡萄糖	Others	其它类	Saccharides and Alcohols	糖及醇类	498-07-7	2	-	17296	3685.9	1966.5	20696	33226	48434	119960	76226	84491	284240	243810	187230	7812.9	10502	23972	35495	18064	33650	74984	41931	22273	230750	186850	208680	84886	101670	80072	--	--
pme2914	UPLC-MS/MS	161.05	99	-	-	162.053	C6H10O5	[M-H]-	3-Hydroxy-3-methylpentane-1,5-dioic acid	3-羟基-3-甲基谷氨酸	Amino acids and derivatives	氨基酸及其衍生物	Amino acids and derivatives	氨基酸及其衍生物	503-49-1	1	-	298020	300650	562460	253350	301510	190120	283700	255570	179800	719660	692450	291940	13352000	528300	4132500	9360400	880640	6627300	5680500	875900	1031600	40184000	1511300	13820000	4100400	5194500	4917500	C03761	--
Lmqp008175	UPLC-MS/MS	163.08	103.05	-	-	162.068	C10H10O2	[M+H]+	Methyl Cinnamate	肉桂酸甲酯	Phenolic acids	酚酸类	Phenolic acids	酚酸类	103-26-4	1	-	232470	399180	166880	261570	241100	157630	20318	6073.6	28886	3474.1	38551	64390	225720	85769	126680	518840	564400	446090	121260	116710	61145	89967	38810	37437	105190	94670	41737	C06358	--
pmf0440	UPLC-MS/MS	163.08	91.1	-	-	162.068	C10H10O2	[M+H]+	4-MethoxycinnaMaldehyde	4-甲氧基肉桂醛	Phenolic acids	酚酸类	Phenolic acids	酚酸类	1963-36-6	3	-	49485	48185	40903	38582	55764	66745	63829	50829	56292	61439	44256	81529	45136	43715	70385	51843	57247	45301	68297	48228	54737	60431	68306	48947	21391	22301	22045	C10475	--
pme2758	UPLC-MS/MS	162.04	144	-	-	163.048	C5H9NO5	[M-H]-	4-Hydroxy-L-glutamic acid	4-羟基-L-谷氨酸	Amino acids and derivatives	氨基酸及其衍生物	Amino acids and derivatives	氨基酸及其衍生物	3913-68-6	3	-	107910	93448	111980	146560	102400	110690	118390	68409	59508	97370	95528	87008	85349	91478	69532	84630	83731	84295	79751	77092	67548	61581	101690	56964	125370	71698	62313	C03079	--
Lmbp000123	UPLC-MS/MS	164.07	56.05	-	-	163.067	C6H13NO2S	[M+H]+	L-Homomethionine	L-高甲硫氨酸	Amino acids and derivatives	氨基酸及其衍生物	Amino acids and derivatives	氨基酸及其衍生物	25148-30-5	3	-	8564.2	11783	48897	9917.8	2799.8	3254.9	6745.3	7407.3	6981.9	127220	144510	95921	1211.4	721.12	2010.5	11313	25583	20198	3500.3	18171	8719.2	146780	38819	59138	31149	22998	19036	C17213	ko00966,ko01110,ko01210
pme1419	UPLC-MS/MS	164.07	104	-	-	163.067	C6H13NO2S	[M+H]+	L-Methionine methyl ester	L-甲硫氨酸甲酯	Amino acids and derivatives	氨基酸及其衍生物	Amino acids and derivatives	氨基酸及其衍生物	10332-17-9	3	-	15218	24448	21092	8712.9	10641	8904.2	13542	9191.4	16458	12986	15363	26644	9243.6	5066.7	8476.2	13619	9300.6	12885	16592	15754	29614	35446	31814	39267	4349.1	2910	5351.7	--	--
Lmmn001643	UPLC-MS/MS	163.04	119.05	-	-	164.047	C9H8O3	[M-H]-	2-Hydroxycinnamic acid	2-羟基肉桂酸	Organic acids	有机酸	Organic acids	有机酸	583-17-5	3	-	11357	17009	10903	394530	1028600	491960	183370	583600	376580	481230	886050	403150	15266	12599	23582	969940	820870	578570	332350	568120	377540	559120	374510	355610	301710	372760	344910	C01772	ko00360,ko00940,ko01100,ko01110
pme1439	UPLC-MS/MS	165.05	119	-	-	164.047	C9H8O3	[M+H]+	p-coumaric acid	对香豆酸	Phenolic acids	酚酸类	Phenolic acids	酚酸类	501-98-4	3	-	14908	26956	128900	78842	155150	196000	31866	54170	95767	259410	487740	194330	15941	5766.7	30478	116380	88732	76738	91672	14170	51792	349680	833740	460080	159420	107740	129800	C00811	ko00130,ko00350,ko00940,ko00950,ko00998,ko01100,ko01110
mws0159	UPLC-MS/MS	163.04	91	-	-	164.047	C9H8O3	[M-H]-	Phenylpyruvic acid	苯丙酮酸	Organic acids	有机酸	Organic acids	有机酸	156-06-9	3	-	15348	2672.8	23373	35396	52710	44766	23690	37700	40714	54052	123840	62185	8680.5	4804.2	2357.1	32148	7986.5	5345	20698	14019	12679	76806	135550	92673	17354	33407	28684	C00166	ko00360,ko00400,ko00960,ko01100,ko01110,ko01210,ko01230
MWSCX015	UPLC-MS/MS	165.05	91.05	-	-	164.047	C9H8O3	[M+H]+	(E)-3-(3,4-dihydroxyphenyl)acrylaldehyde	咖啡醛	Others	其它类	Others	其它	-	3	-	21162	69112	146780	110220	270760	383130	10417	111630	123200	303670	842260	310280	50740	19440	45629	223730	154450	89190	98662	49753	61041	686160	1253900	665070	222810	189430	253560	C10945	ko00940,ko01110
pme3083	UPLC-MS/MS	164.04	120	-	-	165.043	C8H7NO3	[M-H]-	2-(Formylamino)benzoic acid	2-(甲酰氨基)苯甲酸	Phenolic acids	酚酸类	Phenolic acids	酚酸类	3342-77-6	3	-	44056	29722	220590	266520	447120	543900	189500	319100	452450	867610	1267500	964030	30718	17654	52929	280260	124730	113530	135590	120440	175830	870450	1301000	813520	229620	317450	329140	C05653	ko00380,ko01100
pme2617	UPLC-MS/MS	166.05	102	-	-	165.046	C5H11NO3S	[M+H]+	L-Methionine Sulfoxide	蛋氨酸亚砜	Amino acids and derivatives	氨基酸及其衍生物	Amino acids and derivatives	氨基酸及其衍生物	3226-65-1	3	-	1473300	1333400	1518700	918990	937550	1061900	1433200	1743500	1648700	1700500	1739800	1386600	1766300	1907200	1665800	981140	1059800	720360	2014100	1653500	1755500	1828000	1749700	1552300	1674200	1451900	1751000	C02989	ko00270
pme0021	UPLC-MS/MS	166.09	120.08	-	-	165.07	C9H11NO2	[M+H]+	L-Phenylalanine	L-苯丙氨酸	Amino acids and derivatives	氨基酸及其衍生物	Amino acids and derivatives	氨基酸及其衍生物	63-91-2	1	-	5773200	4490900	10417000	9707000	10053000	7614300	13962000	11542000	9361400	17773000	20045000	20709000	5300300	1950000	3096300	4785200	5417600	5243700	12537000	11501000	11096000	22557000	19557000	23527000	9523400	9821700	10020000	C00079	ko00360,ko00400,ko00460,ko00940,ko00960,ko00966,ko00970,ko00998,ko01100,ko01110,ko01210,ko01230,ko02010
pme0282	UPLC-MS/MS	165.02	77.04	-	-	166.027	C8H6O4	[M-H]-	Phthalic acid	邻苯二甲酸	Organic acids	有机酸	Organic acids	有机酸	88-99-3	3	-	6104	23933	26749	20660	39032	58039	46227	87488	72911	113090	117250	140090	56021	46890	24506	57843	26230	42875	178280	177850	172650	253780	123210	222920	74128	86071	85952	C01606	ko01100,ko02010
pme0281	UPLC-MS/MS	165.02	121.03	-	-	166.027	C8H6O4	[M-H]-	Terephthalic acid	对苯二甲酸	Phenolic acids	酚酸类	Phenolic acids	酚酸类	100-21-0	3	-	185350	162460	222080	329280	251200	407570	385810	724410	541380	959140	1320400	1414600	387740	308230	404510	500230	477420	425790	1663900	1859700	1558800	2144200	1648800	1888100	770210	694620	756440	C06337	ko01100
pmc0274	UPLC-MS/MS	167.1	121.1	-	-	166.031	C6H6N4S	[M+H]+	6-Methylmercaptopurine	6-甲基巯嘌呤	Nucleotides and derivatives	核苷酸及其衍生物	Nucleotides and derivatives	核苷酸及其衍生物	50-66-8	3	-	8316100	6038900	13999000	13235000	13594000	9948000	19213000	16061000	13952000	23478000	27118000	28049000	7061400	2454500	4259500	6256700	7600800	6564900	16711000	15461000	15603000	32393000	25251000	32699000	13426000	13607000	14295000	C16614	--
mws0344	UPLC-MS/MS	165.04	75	-	-	166.048	C5H10O6	[M-H]-	D-Xylonic acid	D-木糖酸	Others	其它类	Saccharides and Alcohols	糖及醇类	526-91-0	1	-	2413400	1929400	3352100	12266000	9827300	10804000	8696700	7582400	7563000	11136000	11675000	14354000	6184700	4648300	14188000	11967000	11191000	17587000	18200000	13553000	16774000	22050000	20377000	19103000	10202000	11960000	12965000	C00502	ko00040,ko01100
Lmrn003000	UPLC-MS/MS	165.06	103.06	-	-	166.063	C9H10O3	[M-H]-	2-Hydroxy-3-phenylpropanoic acid	2-羟基-3-苯基丙酸	Phenolic acids	酚酸类	Phenolic acids	酚酸类	7326-19-4	1	-	1231000	1377200	1885500	387690	436600	347160	821950	328530	345440	178700	141940	87930	2844400	3815500	2523000	1355900	2636100	2429400	5165800	7579000	7570200	1109800	2201700	1886500	1525900	2056500	1943600	C05607	ko00360,ko00960,ko01100
Lmgp002595	UPLC-MS/MS	167.07	121.03	-	-	166.063	C9H10O3	[M+H]+	Acetovanillone	香荚兰乙酮	Phenolic acids	酚酸类	Phenolic acids	酚酸类	498-02-2	3	-	218720	272580	113660	296840	522910	277260	104470	224670	147840	74610	51645	32099	40595	75707	25052	566930	526740	95767	180600	161320	46121	67383	85594	30225	154580	110270	167240	C11380	--
Lmbn005172	UPLC-MS/MS	165.06	119.05	-	-	166.063	C9H10O3	[M-H]-	2,6-Dimethoxybenzaldehyde	2,6-二甲氧基苯甲醛	Phenolic acids	酚酸类	Phenolic acids	酚酸类	3392-97-0	2	-	461760	558840	466690	129170	171500	78316	543690	167230	189640	96407	65012	42724	1040200	2276200	1129400	785420	1173900	1056300	5023800	6879200	8497200	399010	815570	1147000	1142600	1414200	1433200	--	--
MWS0274	UPLC-MS/MS	165.06	119.05	-	-	166.063	C9H10O3	[M-H]-	DL-3-Phenyllactic acid	DL-3-苯基乳酸	Organic acids	有机酸	Organic acids	有机酸	828-01-3	2	-	209400	292760	234790	76045	85125	46104	290200	85972	144620	57588	43105	25378	567350	1323400	589960	394030	596790	541460	2797300	3819800	5622900	232700	404190	695840	595910	669530	798910	--	--
mws0467	UPLC-MS/MS	165.06	119.05	-	-	166.063	C9H10O3	[M-H]-	3-(4-Hydroxyphenyl)-propionic acid	3-(4-羟基苯基)丙酸	Phenolic acids	酚酸类	Phenolic acids	酚酸类	501-97-3	3	-	591290	788110	622580	187760	282610	144180	758050	241460	274120	144340	76746	78415	1340300	3388500	1543400	1128400	1635700	1334300	7166100	9255400	12617000	620430	1198200	1561800	1570200	1869600	1824900	C01744	--
MWSmce165	UPLC-MS/MS	165.08	59.02	-	-	166.084	C6H14O5	[M-H]-	L-Fucitol	L-岩藻糖醇	Others	其它类	Saccharides and Alcohols	糖及醇类	13074-06-1	3	-	181480	146930	234240	1094100	962860	1038500	986830	1017800	858040	1117600	1000600	1097700	500270	320560	1116000	1182300	1140300	1732200	2548500	1954100	2284800	2259700	1938100	1787900	1202200	1314900	1376400	--	--
mws0851	UPLC-MS/MS	143.11	143.11	-	-	166.097	C8H15NaO2	[M-Na]-	Sodium Valproate	丙戊酸钠	Others	其它类	Others	其它	1069-66-5	3	-	440160	493230	502830	640710	736870	749090	601070	662490	369250	686760	658440	822230	1120100	864960	1270600	1084200	1223500	979780	1018700	1032300	1130100	926480	697490	859670	569010	657980	608780	--	--
pmn001681	UPLC-MS/MS	165.09	149.06	-	-	166.099	C10H14O2	[M-H]-	1-(4-Methoxyphenyl)-1-propanol	1-(4-甲氧苯基)-1-丙醇	Phenolic acids	酚酸类	Phenolic acids	酚酸类	5349-60-0	3	-	114420	131420	111790	182130	191540	194870	182490	240260	100790	195560	223820	201450	140450	177100	129970	220250	205830	177690	164810	168280	209170	177570	119700	161720	119950	96384	85908	--	--
pma2400	UPLC-MS/MS	167.1	94.99	-	-	166.136	C11H18O	[M+H]+	Dihydrojasmone	二氢茉莉酮	Organic acids	有机酸	Organic acids	有机酸	1128-08-1	3	-	20250	19714	9	65484	33778	41588	9	9	9	10794	9	15060	15483	9	9	148250	287280	282390	57231	27430	34678	803990	538000	520970	114720	125770	127800	--	--
MWS3270	UPLC-MS/MS	166.02	79.96	-	-	167.022	C7H5NO4	[M-H]-	quinolinic Acid	喹啉酸	Alkaloids	生物碱	Alkaloids	生物碱	89-00-9	3	-	66046	81071	51649	181970	155440	144390	228300	143090	140370	284390	202550	384170	109910	162170	108260	160430	70234	199040	143490	85833	131350	336350	144750	246570	118120	151140	142700	C03722	ko00380,ko00410,ko00760,ko01100,ko01240
NK10253223	UPLC-MS/MS	168.06	94.06	-	-	167.058	C8H9NO3	[M+H]+	2-Amino-3-methoxybenzoic acid	2-氨基-3-甲氧基苯甲酸	Phenolic acids	酚酸类	Phenolic acids	酚酸类	3177-80-8	1	-	303560	212630	266840	219780	260620	270760	485920	661240	743540	414500	457490	547370	235570	277830	186980	327680	409520	398240	946420	939070	1048400	996820	836760	869220	412490	419550	434130	C05831	ko00380
Zmjp000624	UPLC-MS/MS	168.06	150.05	-	-	167.058	C8H9NO3	[M+H]+	Pyridoxal	吡哆醛	Others	其它类	Vitamin	维生素	66-72-8	1	-	330200	226680	300090	233950	283560	256330	544650	663320	737650	418670	483000	613320	236440	276130	198460	374440	400180	510190	1261900	1117000	1053400	1157600	880190	959780	422680	470720	451550	C00250	ko00750,ko01100,ko01240
mws2125	UPLC-MS/MS	166.98	78.7	-	-	167.982	C3H5O6P	[M-H]-	Phosphoenolpyruvate	磷酸烯醇式丙酮酸	Organic acids	有机酸	Organic acids	有机酸	138-08-9	3	-	42933	19689	139290	2724.3	9577.1	714.44	8873.6	11292	4431.3	5998.2	5597.4	1251.7	20187	28305	15047	5901	9694.4	9178.4	30307	27401	23152	4551.4	1360.5	4358.3	16164	16142	21263	C00074	ko00010,ko00020,ko00400,ko00440,ko00620,ko00710,ko00998,ko01100,ko01110,ko01200,ko01230,ko01240
pme2598	UPLC-MS/MS	167.03	123.04	-	-	168.042	C8H8O4	[M-H]-	3,4-Dihydroxybenzeneacetic acid	3,4-二羟基苯乙酸	Phenolic acids	酚酸类	Phenolic acids	酚酸类	102-32-9	3	-	93656	41240	88119	128570	44101	144460	188330	85016	291960	175390	21193	156030	33126	9	9	9	35383	9	119930	172880	63081	9	9	9	71311	67995	88670	C01161	ko00350,ko01100
mws0028	UPLC-MS/MS	167.03	108.02	-	-	168.042	C8H8O4	[M-H]-	Vanillic acid	香草酸	Phenolic acids	酚酸类	Phenolic acids	酚酸类	121-34-6	3	-	110960	140500	222420	280370	222750	207840	80007	117400	110580	2886200	1873500	2198500	132650	216610	95183	173480	92212	122340	121420	72498	69908	616340	546260	400930	376950	452060	423460	C06672	--
Hmtp000827	UPLC-MS/MS	169.05	67.05	-	-	168.043	C8H8O4	[M+H]+	Griffonilide	格列风内酯	Others	其它类	Others	其它	61371-55-9	3	-	62472	44429	169740	47987	42642	52384	124640	139710	86198	85055	63646	84724	24108	49291	30935	53835	86090	69860	90740	169940	109310	106440	106520	112470	89320	76183	85246	--	--
pme1383	UPLC-MS/MS	170.08	134.1	-	-	169.074	C8H11NO3	[M+H]+	Pyridoxine	吡哆醇	Others	其它类	Vitamin	维生素	65-23-6	2	-	212170	120360	325790	183810	204010	1489600	195410	226550	788370	230750	165280	289840	318270	289660	55872	851710	891580	273740	874830	1403200	589840	1419700	691420	358770	348140	386110	387990	C00314	ko00750,ko01100,ko01240
pme3186	UPLC-MS/MS	169	79	-	-	169.998	C3H7O6P	[M-H]-	DL-Glyceraldehyde-3-phosphate	DL-甘油醛-3-磷酸	Organic acids	有机酸	Organic acids	有机酸	591-59-3	3	-	943490	177960	624320	9	23261	23533	9	9	5954.9	9	5495.1	9723.8	31280	66880	24993	9	9	9	9	9	9	9	7667.7	9	35299	99195	65560	C00661	--
MWSslk138	UPLC-MS/MS	169.01	151	-	-	170.022	C7H6O5	[M-H]-	2,3,4-Trihydroxybenzoic acid	2,3,4-三羟基苯甲酸	Phenolic acids	酚酸类	Phenolic acids	酚酸类	610-02-6	3	-	9225	9	9	31120	35890	9	63462	63049	22752	2310500	3916700	541990	9	9	9	9	16511	33882	47277	22761	25816	74474	45755	67533	138680	190430	177370	--	--
pme0253	UPLC-MS/MS	174.11	86	-	-	173.105	C8H15NO3	[M+H]+	N-Acetyl-L-leucine	N-乙酰-L-亮氨酸	Amino acids and derivatives	氨基酸及其衍生物	Amino acids and derivatives	氨基酸及其衍生物	1188-21-2	3	-	7569.2	17368	9451.2	40667	24818	27241	105980	68443	92794	73891	55687	62578	8497.2	6682.9	25777	22407	25485	18763	37676	59798	34890	102080	74816	71121	47668	43415	48494	C02710	--
MA10039492	UPLC-MS/MS	173.01	71.03	-	-	174.016	C6H6O6	[M-H]-	Dehydroascorbic acid	脱氢抗坏血酸	Others	其它类	Vitamin	维生素	490-83-5	3	-	40685	43731	17294	1033700	629860	1307400	5491600	3324700	6228400	3289500	1772800	2322000	61173	16905	86568	70919	71606	259400	464320	1496800	1350000	290630	275620	631640	1463100	1959100	2045200	C05422	ko00053,ko00480,ko01100
pme2550	UPLC-MS/MS	173.02	137	-	-	174.016	C6H6O6	[M-H]-	Cis-Aconitic acid	顺式乌头酸	Organic acids	有机酸	Organic acids	有机酸	585-84-2	3	-	14693	8959.7	15978	1077600	654010	991340	9580200	7326500	11222000	5427500	2838400	3577100	6060.8	4343.9	5484.1	92650	134810	184370	1228200	3225900	3307100	960100	821590	1478000	2161500	1966300	2561000	C00417	ko00020,ko00630,ko00660,ko01100,ko01110,ko01210
pme3009	UPLC-MS/MS	175.02	99	-	-	174.016	C6H6O6	[M+H]+	Trans-Citridic acid	反式乌头酸	Organic acids	有机酸	Organic acids	有机酸	4023-65-8	3	-	9	9	9	89721	79963	63760	249480	221630	215960	50324	70888	93918	9	9	9	114590	142720	82428	185530	284700	256110	82962	108290	100550	86425	155730	175620	C02341	ko00660,ko01100
mws0154	UPLC-MS/MS	173.05	93	-	-	174.053	C7H10O5	[M-H]-	Shikimic acid	莽草酸	Organic acids	有机酸	Organic acids	有机酸	138-59-0	2	-	49756	18679	61204	3278500	1654700	3138500	30727000	19043000	29314000	14676000	7620300	8078800	8766.2	23900	12712	180420	402260	559760	3543200	6772000	10951000	2709500	1403800	4019500	4725600	4993400	4875100	C00493	ko00400,ko01100,ko01110,ko01230,ko01240
mws0242	UPLC-MS/MS	173.08	111	-	-	174.089	C8H14O4	[M-H]-	Suberic Acid	辛二酸	Organic acids	有机酸	Organic acids	有机酸	505-48-6	3	-	39262	34690	54090	68408	102760	174380	72699	70010	117810	199540	283810	627210	57338	131120	35329	18900	29374	25025	31002	33700	13352	247130	330170	164930	96751	92817	76433	C08278	--
mws1401	UPLC-MS/MS	175.11	84	-	-	174.1	C7H14N2O3	[M+H]+	L-Theanine	L-茶氨酸	Amino acids and derivatives	氨基酸及其衍生物	Amino acids and derivatives	氨基酸及其衍生物	3081-61-6	3	-	17463	14858	19822	13618	19104	23091	20412	21224	13814	5750.1	23263	18479	26375	2550400	17234	38546	5293.3	15739	26755	20673	34146	630960	135930	146320	138730	124800	149440	C01047	--
Zmyn000155	UPLC-MS/MS	173.11	131.08	-	-	174.1	C7H14N2O3	[M-H]-	N-α-Acetyl-L-ornithine	N-α-乙酰基-L-鸟氨酸	Amino acids and derivatives	氨基酸及其衍生物	Amino acids and derivatives	氨基酸及其衍生物	6205-08-9	1	-	3017100	4132400	9436600	50108	38992	47263	19662	21932	20315	32069	56819	85353	4939300	1445300	4400000	27386	39061	41997	30231	11422	23766	100750	90600	230730	802760	958110	1141900	C00437	ko00220,ko01100,ko01110,ko01210,ko01230
MWSmce119	UPLC-MS/MS	175.11	70.06	-	-	174.112	C6H14N4O2	[M+H]+	L-Arginine	L-精氨酸	Amino acids and derivatives	氨基酸及其衍生物	Amino acids and derivatives	氨基酸及其衍生物	74-79-3	1	-	9738200	12513000	72932000	103520	56143	123310	73393	26355	42747	188970	263070	336330	18682000	4192300	17051000	90784	132190	138600	91795	27130	83945	633950	482490	1085500	2897300	4125400	4692200	C00062	ko00220,ko00261,ko00330,ko00472,ko00970,ko01100,ko01110,ko01230,ko02010
pme2559	UPLC-MS/MS	174.04	88	-	-	175.048	C6H9NO5	[M-H]-	N-Acetyl-L-Aspartic Acid	N-乙酰-L-天冬氨酸	Amino acids and derivatives	氨基酸及其衍生物	Amino acids and derivatives	氨基酸及其衍生物	997-55-7	3	-	163470	164660	192020	617280	137630	224320	156950	48133	111200	114820	38817	279830	131640	160850	274450	119300	319010	160130	94476	178680	102800	117430	107440	119700	119050	151820	157740	C01042	ko00250,ko01100
pme1651	UPLC-MS/MS	176.1	130.1	-	-	175.063	C10H9NO2	[M+H]+	Indole 3-acetic acid (IAA)	吲哚-3-乙酸	Alkaloids	生物碱	Plumerane	吲哚类生物碱	87-51-4	3	-	30000	16754	29242	16248	19809	6896.2	10950	12479	20076	28688	201740	43317	12806	9735.2	14760	22349	30154	16974	13585	4035	9230	157140	95004	93386	21800	46803	47501	C00954	ko00380,ko01100,ko04075
pme0008	UPLC-MS/MS	176.1	113	-	-	175.096	C6H13N3O3	[M+H]+	L-Citrulline	L-瓜氨酸	Amino acids and derivatives	氨基酸及其衍生物	Amino acids and derivatives	氨基酸及其衍生物	372-75-8	3	-	1034700	1305500	3086500	112800	68188	138670	118290	114510	119370	198380	161350	245020	1934500	627400	1413900	65106	68445	99702	122070	122400	118800	230810	241420	358640	569780	674930	597900	C00327	ko00220,ko01100,ko01110,ko01230
mws4175	UPLC-MS/MS	175.02	85.03	-	-	176.032	C6H8O6	[M-H]-	D-Glucurono-6,3-lactone	D-葡萄糖醛酸-6,3-内酯	Others	其它类	Saccharides and Alcohols	糖及醇类	32449-92-6	3	-	65677	44574	73570	72736	39815	53828	106770	73988	120780	124580	95046	92597	96730	87378	100120	111200	104570	168560	274090	240600	247230	197400	213220	258660	114980	139970	127940	C02670	ko00053,ko01100
MWSmce690	UPLC-MS/MS	175.02	59.01	-	-	176.032	C6H8O6	[M-H]-	Erythorbic Acid; Isoascorbic Acid	异抗坏血酸	Others	其它类	Vitamin	维生素	89-65-6	3	-	133830	92054	78634	134690	11468	33421	337780	77624	222790	445710	94165	123570	180270	156400	283880	91755	130700	357860	372380	761110	458160	258950	378850	379510	181000	260540	195140	--	--
Lmbn001754	UPLC-MS/MS	175.06	115.04	-	-	176.068	C7H12O5	[M-H]-	3-Isopropylmalic Acid	3-异丙基苹果酸	Organic acids	有机酸	Organic acids	有机酸	921-28-8	1	-	114620	75866	172290	1315300	513090	4339200	6419300	5016700	8987600	2870900	1289100	2807000	712190	534770	621250	2463600	4595600	2390100	14145000	36391000	18137000	9889700	7833100	7527100	4900200	5490500	5812600	C04411	ko00290,ko01100,ko01110,ko01210,ko01230
pmb3101	UPLC-MS/MS	175.06	115	-	-	176.068	C7H12O5	[M-H]-	2-Isopropylmalic Acid	2-异丙基苹果酸	Organic acids	有机酸	Organic acids	有机酸	49601-06-1	1	-	84882	61145	125420	1098600	381410	2913400	5265600	4514400	7521700	2231100	1172100	2744800	483610	426350	435850	1847900	3168000	1601700	11860000	30883000	14632000	8792700	6408700	6128500	3523500	4853200	4824200	C02504	ko00290,ko00620,ko01100,ko01110,ko01210,ko01230
Zmgn001448	UPLC-MS/MS	175.06	115.04	-	-	176.068	C7H12O5	[M-H]-	2-Propylmalic Acid	2-丙基苹果酸	Organic acids	有机酸	Organic acids	有机酸	-	1	-	137840	78036	162190	1397100	486290	4336700	6128500	4221100	9090400	2846200	1171500	3069700	636440	563710	567710	2416900	4485600	2349900	14024000	36486000	17566000	10159000	6795300	7216900	4563300	5469400	5615400	C05994	ko00620
mws1013	UPLC-MS/MS	177.02	133.2	-	-	178.027	C9H6O4	[M-H]-	Esculetin	秦皮乙素	Lignans and Coumarins	木脂素和香豆素	Coumarins	香豆素	305-01-1	1	-	1928000	7675600	3627000	676650	1243100	312010	194180	279880	99656	160030	246030	135300	295720	334540	268770	1214000	177790	189550	118670	135050	177570	109040	185420	105370	618260	748970	683610	C09263	--
pmb2795	UPLC-MS/MS	177	145	-	-	178.063	C10H10O3	[M-H]-	4-Methoxycinnamic acid	4-甲氧基肉桂酸	Phenolic acids	酚酸类	Phenolic acids	酚酸类	830-09-1	3	-	4552.7	5407.4	37556	11355	23231	47555	30457	24902	191540	327880	203690	138920	3404.4	1759.7	4326.6	15127	10641	14789	15449	9788.5	23619	306630	430290	202090	78549	102340	109920	--	--
mws1195	UPLC-MS/MS	179.07	147.1	-	-	178.063	C10H10O3	[M+H]+	p-coumaric acid methyl ester	对香豆酸甲酯	Phenolic acids	酚酸类	Phenolic acids	酚酸类	3943-97-3	3	-	9	9	52965	150300	182320	170800	41487	38634	204470	537310	454890	194960	5444.6	9	13581	131940	169010	127730	38114	20610	33460	371850	681570	294260	139760	146530	154580	--	--
Jmzn006005	UPLC-MS/MS	177.06	117.04	-	-	178.063	C10H10O3	[M-H]-	3,4-methylenedioxy cinnamyl alcohol	3,4-亚甲二氧肉桂醇	Lignans and Coumarins	木脂素和香豆素	Lignans	木脂素	58095-76-4	3	-	7469.5	9511.4	77596	21191	43389	100210	80300	53664	419610	670530	437970	338230	7341.3	2798.7	6358.7	29270	21327	32604	37396	22706	46543	622050	896560	414180	185790	221990	212150	--	--
mws2212	UPLC-MS/MS	179.03	135.05	-	-	180.042	C9H8O4	[M-H]-	Caffeic acid	咖啡酸	Phenolic acids	酚酸类	Phenolic acids	酚酸类	331-39-5	1	-	981550	3319100	1465100	7155800	13312000	2044300	882570	2360500	407020	2019500	3084400	813450	1072300	1354300	1617300	2919900	2124600	1201400	431280	207710	1001000	640750	850310	606860	1403200	1800300	1556400	C01197	ko00940,ko01100,ko01110
pme0516	UPLC-MS/MS	179.06	87	-	-	180.063	C6H12O6	[M-H]-	Inositol	肌醇	Others	其它类	Saccharides and Alcohols	糖及醇类	87-89-8	3	-	157990	112230	104280	418090	370940	411850	607530	796530	426090	1320000	1683800	908620	222620	297090	253360	399500	491780	529100	1668900	1477400	1261700	2161000	2385800	2082400	752930	922150	978680	C00137	ko00052,ko00053,ko00562,ko01100,ko01110,ko02010,ko04070
mws4170	UPLC-MS/MS	179.06	59.01	-	-	180.063	C6H12O6	[M-H]-	D-Glucose	D-葡萄糖	Others	其它类	Saccharides and Alcohols	糖及醇类	50-99-7	2	-	472020	287720	224910	1272400	1538000	1408600	4802900	3095300	3022300	8238200	9005100	5696800	438870	563680	805920	1134400	926740	1424700	4785200	3216600	2711500	8865100	8566900	8445000	3058100	3814400	4001100	C00031	ko00010,ko00030,ko00052,ko00500,ko00520,ko00524,ko00901,ko01100,ko01110,ko02010
mws1164	UPLC-MS/MS	179.06	59.01	-	-	180.063	C6H12O6	[M-H]-	D-Fructose	D-果糖	Others	其它类	Saccharides and Alcohols	糖及醇类	57-48-7	2	-	483060	321600	304220	1221000	1473000	1400300	4516400	3208400	3052900	8502700	8928000	6228100	435650	542960	686950	1100400	1086100	1347500	4370800	3105800	2327800	9313500	8364900	8293800	3179800	3684100	3832600	C05003	--
mws0093	UPLC-MS/MS	179.07	146	-	-	180.079	C10H12O3	[M-H]-	Coniferyl alcohol	松柏醇	Phenolic acids	酚酸类	Phenolic acids	酚酸类	458-35-5	3	-	127730	144790	271040	86338	222950	37134	9362.2	32335	14994	16984	24164	25920	70791	89300	63767	51448	58350	69197	16031	10703	13722	3997	3739.8	5330.5	30388	18316	38944	C00590	ko00940,ko00998,ko01100,ko01110
MWS2070	UPLC-MS/MS	179.07	92.03	-	-	180.079	C10H12O3	[M-H]-	Propyl 4-hydroxybenzoate	4-羟基苯甲酸丙酯	Phenolic acids	酚酸类	Phenolic acids	酚酸类	94-13-3	3	-	5091.8	2548.8	2409.1	4651.1	7945.6	4573.2	6423.5	1059.3	2629.5	2981.3	2262.8	3269.8	2169.3	18806	1499	9874.1	20560	8560.4	7156.8	5545.6	5169.9	6501.5	3669.7	5624.2	4784.4	5248.4	6234.6	--	--
Hmcp009963	UPLC-MS/MS	180.14	123.07	-	-	180.138	C11H18NO+	[M]+	Candicine	N-甲基大麦芽碱	Alkaloids	生物碱	Phenolamine	酚胺	6656-13-9	1	-	195110	220820	264950	235790	446780	301900	311660	476480	589030	317890	319800	373340	278900	308980	251590	206140	171360	397980	442050	654660	562900	314610	261840	572670	279940	297240	326350	C10575	--
Zmsp000878	UPLC-MS/MS	182.08	136.08	-	-	181.074	C9H11NO3	[M+H]+	4-Hydroxy-5-(2-oxo-1-pyrrolidinyl)benzoic acid	4-羟基-5-(2-氧-1-吡咯烷基)苯甲酸	Alkaloids	生物碱	Pyrrole alkaloids	吡咯类生物碱	-	1	-	6330200	4020700	12117000	5533000	5137000	4417900	6443300	4423800	4571000	8632400	8617200	9635800	5564200	1456000	8576700	3534300	4333200	3461800	8331800	5258900	7527500	14137000	13129000	14182000	5960400	6456100	6601700	--	--
MWStz070	UPLC-MS/MS	182.08	91.05	-	-	181.074	C9H11NO3	[M+H]+	N-(2-Hydroxy-4-methoxyphenyl)acetamide	N-(2-羟基-4-甲氧基苯基)乙酰胺	Alkaloids	生物碱	Phenolamine	酚胺	58469-06-0	1	-	18503000	11687000	35998000	15086000	14122000	12256000	17747000	13559000	13640000	24609000	26469000	27035000	16714000	3846300	24915000	9911300	13586000	9720300	23308000	15078000	20910000	37636000	34889000	37808000	18325000	17242000	17676000	--	--
mws0250	UPLC-MS/MS	182.08	136.1	-	-	181.074	C9H11NO3	[M+H]+	L-Tyrosine	L-酪氨酸	Amino acids and derivatives	氨基酸及其衍生物	Amino acids and derivatives	氨基酸及其衍生物	60-18-4	1	-	21184000	14867000	40838000	17557000	19101000	16226000	19722000	16005000	17654000	30032000	29043000	32392000	18766000	4641800	28302000	12557000	16446000	13147000	27690000	19590000	25170000	39383000	40008000	41579000	20487000	22688000	21722000	C00082	ko00130,ko00261,ko00350,ko00360,ko00400,ko00460,ko00730,ko00940,ko00950,ko00965,ko00966,ko00970,ko00998,ko01100,ko01110,ko01210,ko01230,ko01240
Hmcn006267	UPLC-MS/MS	181.05	107.01	-	-	182.058	C9H10O4	[M-H]-	2,6-Dimethoxybenzoic acid	2,6-二甲氧基苯甲酸	Phenolic acids	酚酸类	Phenolic acids	酚酸类	1466-76-8	3	-	5828.9	7252.3	30988	643470	411230	267370	35032	69333	53827	1458300	1506500	1122900	12488	6895.2	9956.3	401470	130260	435770	145760	38509	111570	554500	552190	665130	378480	414490	434720	--	--
mws1350	UPLC-MS/MS	181.05	151	-	-	182.058	C9H10O4	[M-H]-	Syringaldehyde; 4-Hydroxy-3,5-Dimethoxybenzaldehyde	丁香醛; 4-羟基-3,5-二甲氧基苯甲醛	Phenolic acids	酚酸类	Phenolic acids	酚酸类	134-96-3	3	-	28088	40494	26362	188420	152460	230620	33854	33410	43797	18823	15873	90546	13261	18629	12174	350030	335510	463580	35477	36552	30357	96752	83671	66259	75173	78296	78653	--	--
MWSmce455	UPLC-MS/MS	181.05	107.01	-	-	182.058	C9H10O4	[M-H]-	Vanillic acid methyl ester	香草酸甲酯	Phenolic acids	酚酸类	Phenolic acids	酚酸类	3943-74-6	3	-	4515.7	9865.6	26407	616380	382470	272850	33176	71951	46420	1456100	1480000	1118600	10206	7181.1	7114.1	383960	115410	382190	117850	36473	89789	516760	537540	616610	346580	410700	417040	--	--
Hmtn001288	UPLC-MS/MS	181.05	135.04	-	-	182.058	C9H10O4	[M-H]-	Methyl 2,4-dihydroxyphenylacetate	2,4-二羟基苯乙酸甲酯	Phenolic acids	酚酸类	Phenolic acids	酚酸类	67828-42-6	1	-	15529	43934	37658	12695	18950	10336	34661	31017	29996	11195	14141	10828	65416	82431	37849	76446	110750	68563	503520	456070	404990	55390	71129	82863	81675	98606	108000	--	--
Lmrn001951	UPLC-MS/MS	181.05	135.04	-	-	182.058	C9H10O4	[M-H]-	(S)-2-Hydroxy-3-(4-Hydroxyphenyl)Propanoic Acid	2-羟基-(4-羟基苯基)丙酸	Phenolic acids	酚酸类	Phenolic acids	酚酸类	23508-35-2	1	-	34494	52037	60774	18343	9228	6670.2	9	9	25285	4627.2	9	9	93448	104020	58551	103730	141880	107250	271710	394760	226420	69589	77338	83238	73984	56793	71819	--	--
pme2237	UPLC-MS/MS	181.07	101	-	-	182.079	C6H14O6	[M-H]-	Dulcitol	半乳糖醇	Others	其它类	Saccharides and Alcohols	糖及醇类	608-66-2	3	-	249970	248130	107370	76255	320980	188570	172010	54178	136460	506580	509420	336550	514920	315940	915550	120880	50621	87774	129820	54326	56172	666710	449320	482280	183400	278860	322780	C01697	ko00052,ko01100
mws0214	UPLC-MS/MS	181.07	71	-	-	182.079	C6H14O6	[M-H]-	D-Sorbitol	D-山梨糖醇	Others	其它类	Saccharides and Alcohols	糖及醇类	50-70-4	3	-	217160	179150	61243	73681	260850	121060	142480	31278	109870	504160	370500	275240	331410	294780	829010	76909	33653	62346	94981	51073	67731	477310	334700	272590	207870	246730	295460	C00794	ko00051,ko00052,ko01100,ko02010
mws1155	UPLC-MS/MS	181.07	101.02	-	-	182.079	C6H14O6	[M-H]-	D-Mannitol	D-甘露醇	Others	其它类	Saccharides and Alcohols	糖及醇类	69-65-8	3	-	68331	71813	38371	29485	113320	47924	46315	11166	38911	169650	140570	97835	147510	127500	245640	29253	19083	23219	35054	14562	28440	228960	155640	156890	53071	75534	85199	C00392	ko00051,ko01100,ko02010
pme2596	UPLC-MS/MS	184.06	148	-	-	183.053	C8H9NO4	[M+H]+	4-Pyridoxic acid	4-吡哆酸	Others	其它类	Vitamin	维生素	82-82-6	3	-	20969	12120	30836	30928	32592	39711	141930	193150	133270	77015	82483	70326	11418	11747	17639	23679	30661	31224	75129	72916	116140	81346	64744	81434	54963	52936	51964	C00847	ko00750,ko01100
pmb1754	UPLC-MS/MS	184	125	-	-	184.073	C5H15NO4P+	[M]+	O-Phosphocholine	O-磷酸胆碱	Alkaloids	生物碱	Alkaloids	生物碱	107-73-3	3	-	682960	617550	710540	500050	500560	504990	645880	667990	615090	590140	578760	574490	806500	781960	802720	505500	505030	491880	771820	655200	821090	907660	765090	670600	573380	655910	734830	C00588	ko00564,ko01100
Lmcn002039	UPLC-MS/MS	183.07	153.02	-	-	184.074	C9H12O4	[M-H]-	Antiarol; 3,4,5-Trimethoxyphenol	3,4,5-三甲氧基苯酚	Phenolic acids	酚酸类	Phenolic acids	酚酸类	642-71-7	2	-	155080	241630	111350	485150	372310	574970	37871	31290	80677	29510	19011	312860	74111	101130	105440	2128600	2345300	3240900	581050	469760	538700	8193200	6304700	6212200	1105600	1290300	1353100	C10765	--
mws0752	UPLC-MS/MS	185.15	185.16	-	-	186.162	C11H22O2	[M-H]-	Undecylic Acid	十一烷酸	Lipids	脂质	Free fatty acids	游离脂肪酸	112-37-8	3	-	228770	288910	349730	297040	369400	318440	307310	342180	197350	370580	382930	454410	372220	281840	353950	382790	328900	375640	332700	318340	337270	432320	372280	433750	276520	372050	384780	C17715	--
Smcp001137	UPLC-MS/MS	188.07	118.06	-	-	187.063	C11H9NO2	[M+H]+	naphthisoxazol A	naphthisoxazol A	Others	其它类	Others	其它	-	1	-	10937000	10428000	28220000	2841400	4953000	2254400	4849000	4244700	2367900	22549000	28089000	9455400	23203000	9473600	24664000	2438800	3735400	2917100	12102000	5869100	8654900	12784000	21476000	22265000	10405000	12119000	10906000	--	--
pmn001492	UPLC-MS/MS	187.1	123.1	-	-	188.041	C11H8O3	[M-H]-	Ayapin	泽兰内酯	Lignans and Coumarins	木脂素和香豆素	Coumarins	香豆素	494-56-4	3	-	21718	40496	42178	27847	33800	38105	25510	32872	30990	30632	18110	49639	36862	35252	28720	60347	39954	37872	27928	25992	23759	53708	51726	52096	32658	32162	25838	C18078	--
pme0137	UPLC-MS/MS	187.07	125	-	-	188.08	C7H12N2O4	[M-H]-	N-Acetyl-L-Glutamine	N-乙酰-L-谷氨酰胺	Amino acids and derivatives	氨基酸及其衍生物	Amino acids and derivatives	氨基酸及其衍生物	2490-97-3	3	-	305520	415960	322410	666080	855440	1889900	197450	344440	300990	300310	280880	1181400	1379500	1078300	845920	2059700	583410	1616500	626200	369180	377250	1462800	154600	832220	616290	626810	596570	--	--
pmn001380	UPLC-MS/MS	187.1	169.09	-	-	188.105	C9H16O4	[M-H]-	Eucommiol	杜仲醇	Others	其它类	Others	其它	55930-44-4	3	-	53868	32114	64182	27910	39729	62870	58985	33693	57140	23388	33667	54200	58505	43633	44692	28632	37782	46182	46387	55354	25401	100590	36638	77784	25973	42390	49816	C17878	--
mws0237	UPLC-MS/MS	187.1	125	-	-	188.105	C9H16O4	[M-H]-	Azelaic acid	壬二酸	Organic acids	有机酸	Organic acids	有机酸	123-99-9	3	-	442230	379560	594330	471240	514040	656630	516200	435350	618040	342740	255640	664710	503470	354660	384680	524670	455540	426250	462800	462900	346840	1044800	648010	857650	422070	497200	479940	C08261	--
mws0736	UPLC-MS/MS	189.12	86	-	-	188.116	C8H16N2O3	[M+H]+	N-Glycyl-L-leucine	N-甘氨酰-L-亮氨酸	Amino acids and derivatives	氨基酸及其衍生物	Amino acids and derivatives	氨基酸及其衍生物	869-19-2	2	-	293820	476860	923750	2179200	2769100	1693800	3293700	3763700	2378500	2533300	4038200	3220400	168500	30607	87602	1030500	1181600	1000600	2219800	1910300	1217000	4927400	3883900	3984500	1230200	1675500	1735800	C02155	--
pme0122	UPLC-MS/MS	189.12	126	-	-	188.116	C8H16N2O3	[M+H]+	N6-Acetyl-L-lysine	N6-乙酰-L-赖氨酸	Amino acids and derivatives	氨基酸及其衍生物	Amino acids and derivatives	氨基酸及其衍生物	692-04-6	3	-	69303	66627	114850	48064	54247	37576	92502	53115	45307	163960	100470	138090	76977	46139	177910	13448	18323	26270	65789	43656	55235	128600	105740	154730	91568	89959	82692	C02727	ko00310,ko01100
mws5041	UPLC-MS/MS	189.12	86.1	-	-	188.116	C8H16N2O3	[M+H]+	L-Glycyl-L-isoleucine	L-甘氨酰-L-异亮氨酸	Amino acids and derivatives	氨基酸及其衍生物	Amino acids and derivatives	氨基酸及其衍生物	19461-38-2	2	-	300960	414220	645020	1825900	2369000	1397000	2712500	3274000	2110200	2266000	3545000	2644100	144090	39123	83639	969780	1095700	822690	1834900	1591600	1472600	3490000	3165000	3269400	1255500	1418300	1421400	--	--
Zmdp000292	UPLC-MS/MS	189.14	70.07	-	-	188.127	C7H16N4O2	[M+H]+	Arginine methyl ester	精氨酸甲酯	Amino acids and derivatives	氨基酸及其衍生物	Amino acids and derivatives	氨基酸及其衍生物	-	1	-	10482000	12296000	21371000	219540	112990	209050	312040	309020	393260	752730	794140	1036400	22500000	4747000	19292000	71387	175790	116990	283260	174580	235350	979400	1344400	2019900	3957800	3898300	3748800	--	--
Zmjp000182	UPLC-MS/MS	189.13	70.07	-	-	188.127	C7H16N4O2	[M+H]+	N-Monomethyl-L-arginine	N-单甲基-L-精氨酸	Amino acids and derivatives	氨基酸及其衍生物	Amino acids and derivatives	氨基酸及其衍生物	17035-90-4	1	-	8608700	11025000	22900000	186030	121230	154660	316750	266440	374760	727460	862950	823210	22880000	3157500	19562000	74646	161500	108130	271380	169650	234370	1117300	1324700	1525000	3696300	4959500	3987500	C03884	--
Zmzp000145	UPLC-MS/MS	189.16	84.08	-	-	188.152	C9H20N2O2	[M+H]+	Trimethyllysine	三甲基赖氨酸	Amino acids and derivatives	氨基酸及其衍生物	Amino acids and derivatives	氨基酸及其衍生物	23284-33-5	3	-	589960	1103200	1152400	233660	140600	38700	56192	48316	26717	1278300	1383500	685800	549540	73768	827860	3409.7	12174	9059.8	16085	19403	29471	132010	139680	208450	331280	231350	407970	C03793	ko00310,ko01100
pme0075	UPLC-MS/MS	188.06	128	-	-	189.064	C7H11NO5	[M-H]-	N-Acetyl-L-glutamic acid	N-乙酰-L-谷氨酸	Amino acids and derivatives	氨基酸及其衍生物	Amino acids and derivatives	氨基酸及其衍生物	1188-37-0	3	-	202680	265920	225710	73071	127450	67150	64400	63744	62575	83734	125200	150400	185480	298790	225660	75795	55838	58195	40883	32906	16923	145760	164450	142330	89773	126640	104590	C00624	ko00220,ko01100,ko01110,ko01210,ko01230
mws0193	UPLC-MS/MS	190.12	127	-	-	189.111	C7H15N3O3	[M+H]+	L-Homocitrulline	L-高瓜氨酸	Amino acids and derivatives	氨基酸及其衍生物	Amino acids and derivatives	氨基酸及其衍生物	1190-49-4	3	-	43317	59313	60474	22795	16483	14699	19486	14986	10896	47462	36236	37131	58734	36273	110350	16927	10446	13590	32587	27537	23985	23919	24303	48179	36684	33893	24238	C02427	--
pme0278	UPLC-MS/MS	191.1	128	-	-	190.095	C7H14N2O4	[M+H]+	2,6-Diaminooimelic acid	2,6-二氨基庚二酸	Amino acids and derivatives	氨基酸及其衍生物	Amino acids and derivatives	氨基酸及其衍生物	583-93-7	3	-	68331	93403	68586	44541	173440	38112	40357	20102	25777	43066	30081	67356	86677	62470	101300	93788	41235	40725	48022	19740	17423	55199	43244	50276	53968	52734	44145	C00666	ko00300,ko01100,ko01110,ko01230
pmp001232	UPLC-MS/MS	191.11	135	-	-	190.099	C12H14O2	[M+H]+	Neoligustilide	新藁本内脂	Others	其它类	Others	其它	-	3	-	7112.2	7789.7	8601.1	31116	22993	59579	77386	38307	77448	62352	29226	54057	9	9	9	9	9	9	9	9	9	9	9	9	37038	42576	40807	--	--
Zmyn000453	UPLC-MS/MS	191.02	111.01	-	-	192.027	C6H8O7	[M-H]-	Isocitric Acid	异柠檬酸	Organic acids	有机酸	Organic acids	有机酸	320-77-4	2	-	16341000	15688000	17285000	9644300	7902100	13386000	8666700	7191600	6021400	10067000	11235000	10743000	19907000	22963000	17838000	9475800	10917000	8307300	8281400	6397700	8514600	13409000	16893000	13741000	10516000	11017000	11511000	C00311	ko00020,ko00630,ko01100,ko01110,ko01200,ko01210,ko01230,ko01240
mws0281	UPLC-MS/MS	191.02	111.01	-	-	192.027	C6H8O7	[M-H]-	Citric Acid	柠檬酸	Organic acids	有机酸	Organic acids	有机酸	77-92-9	1	-	49925000	39569000	42490000	27090000	21641000	33630000	19736000	19593000	19572000	34511000	36213000	37486000	56953000	60320000	53773000	20942000	23127000	22335000	19267000	16884000	22266000	45493000	49727000	43733000	34115000	39456000	37436000	C00158	ko00020,ko00250,ko00630,ko01100,ko01110,ko01200,ko01210,ko01230,ko01240
MWSmce658	UPLC-MS/MS	193.05	153.02	-	-	192.042	C10H8O4	[M+H]+	Noreugenin; 5,7-Dihydroxy-2-Methylchromone	去甲丁香色原酮; 5,7-二羟基-2-甲基色酮	Phenolic acids	酚酸类	Phenolic acids	酚酸类	1013-69-0	1	-	99498	510010	343400	211540	616140	86388	734950	2185600	339090	259670	453290	232250	4535.2	53893	18721	3165.5	9	3342	9	9	1809.1	54273	16268	63874	221880	237370	280540	C20462	--
MWSCX014	UPLC-MS/MS	193.05	133.03	-	-	192.042	C10H8O4	[M+H]+	Scopoletin (7-Hydroxy-6-methoxycoumarin)	东莨菪内酯	Lignans and Coumarins	木脂素和香豆素	Coumarins	香豆素	92-61-5	1	-	76976	134160	2050100	988220	1904000	1397500	574040	1124100	974480	5064600	1824600	3137000	113470	9	62110	598030	145290	106720	341500	40716	269380	2358600	1511500	1020000	925510	941160	1112400	C01752	ko00940,ko01110
Hmcp002123	UPLC-MS/MS	193.05	178.02	-	-	192.042	C10H8O4	[M+H]+	Isoscopoletin (6-Hydroxy-7-Methoxycoumarin)	异莨菪亭	Lignans and Coumarins	木脂素和香豆素	Coumarins	香豆素	776-86-3	1	-	64726	145820	1902100	991800	1889700	1387600	743710	1044600	993180	5032200	2024000	3297300	68976	20406	24030	502030	268250	241970	447560	56115	319660	2402700	1523200	1155900	910480	1038300	1056800	C18079	--
mws0277	UPLC-MS/MS	191.06	85	-	-	192.063	C7H12O6	[M-H]-	Quinic Acid	奎宁酸	Organic acids	有机酸	Organic acids	有机酸	77-95-2	2	-	887390	698870	926700	513630	392230	680130	279930	316060	254240	415290	471900	530310	945540	1140100	952550	469780	572180	433360	326390	303130	394100	605170	821420	713080	490190	559850	612200	C00296	ko00400,ko01100
mws1189	UPLC-MS/MS	193.04	72.8	-	-	194.033	C6H10O7	[M-H]-	D-Galacturonic acid	D-半乳糖醛酸	Organic acids	有机酸	Organic acids	有机酸	685-73-4	3	-	43552	33236	68979	48607	33531	71033	100030	39680	81916	196990	220100	88404	51097	48142	35313	34735	51263	43175	90236	91394	105710	401000	403980	421270	131450	141070	104110	C00333	ko00040,ko00053,ko00520,ko01100,ko01240,ko02010
mws0014	UPLC-MS/MS	193.05	134.01	-	-	194.058	C10H10O4	[M-H]-	Ferulic acid	阿魏酸	Phenolic acids	酚酸类	Phenolic acids	酚酸类	537-98-4	3	-	7043500	8239800	18508000	1068100	1588200	1077000	555190	670630	535940	2418800	2728100	2944100	5098800	2038900	7461900	1439800	976290	1049100	396030	149980	708300	1670700	2024100	1552400	1785200	2102700	2001000	C01494	ko00940,ko01100,ko01110
pme0422	UPLC-MS/MS	193.06	134	-	-	194.058	C10H10O4	[M-H]-	Isoferulic Acid	异阿魏酸	Phenolic acids	酚酸类	Phenolic acids	酚酸类	537-73-5	3	-	7063500	7785900	18440000	1069800	1594200	1042200	521220	653290	549190	2338200	2605000	3274600	5289200	2092700	7410500	1499400	898260	946710	376620	126980	834400	1693500	1970500	1661600	1701100	2131100	2086500	C10470	--
MWSmce632	UPLC-MS/MS	195.06	93.03	-	-	194.058	C10H10O4	[M+H]+	Vanillin acetate	香兰素乙酸酯	Others	其它类	Others	其它	881-68-5	3	-	6533	13658	3268.1	216430	193370	165680	60702	40951	59136	139720	165350	205940	3990	8797	1269.4	131360	186000	73950	51000	68784	11421	149830	290490	146890	61473	79994	87630	--	--
Lmdn003756	UPLC-MS/MS	193.05	135.05	-	-	194.058	C10H10O4	[M-H]-	Methyl caffeate	咖啡酸甲酯	Phenolic acids	酚酸类	Phenolic acids	酚酸类	3843-74-1	3	-	4944.7	7896.1	7841.9	113380	156350	97529	96782	110730	222020	282130	246920	716750	9	9	9	39436	22531	77751	57095	53241	91287	210660	143770	200900	105430	122840	185180	C10477	--
MWSslk097	UPLC-MS/MS	195.06	163.04	-	-	194.058	C10H10O4	[M+H]+	Dimethyl phthalate	邻苯二甲酸二甲酯	Phenolic acids	酚酸类	Phenolic acids	酚酸类	131-11-3	3	-	141280	131700	136510	115120	153260	128560	140850	227690	214700	130440	215300	168100	126050	85200	92622	180890	134380	120350	230590	153800	195650	194170	112320	190360	84106	99848	84137	C11233	--
mws2104	UPLC-MS/MS	193.07	99.01	-	-	194.079	C7H14O6	[M-H]-	D-Pinitol	D-松醇	Others	其它类	Saccharides and Alcohols	糖及醇类	10284-63-6	3	-	6871.8	12029	6125.2	18726	27159	20478	45560	36139	58942	44524	34499	38364	29140	21059	43745	31537	14008	33369	54298	45116	50901	60279	60717	62759	30886	34000	39392	C03844	--
pme0534	UPLC-MS/MS	195.05	74.9	-	-	196.058	C6H12O7	[M-H]-	Gluconic acid	葡萄糖酸	Others	其它类	Saccharides and Alcohols	糖及醇类	526-95-4	1	-	900180	1538900	954200	1413300	1137100	1101700	1159600	1038600	991080	2158200	2267200	1918900	3000400	3028100	3982900	1625400	1487000	2451400	3115300	2409200	2395200	4250600	3948200	3102800	1783200	2090600	2225700	C00257	ko00030,ko01100,ko01110,ko01200
mws0027	UPLC-MS/MS	197.05	123	-	-	198.053	C9H10O5	[M-H]-	Syringic acid	丁香酸	Phenolic acids	酚酸类	Phenolic acids	酚酸类	530-57-4	3	-	9	9	9	42501	53909	25992	9	8559.8	5759.8	11178	9	41665	9	9	9	162040	100130	89742	150330	125360	118380	289910	118570	221700	63491	82866	62962	C10833	--
pmb2640	UPLC-MS/MS	199.17	199.17	-	-	200.178	C12H24O2	[M-H]-	Dodecanoic acid (Lauric acid)	十二烷酸(月桂酸)	Lipids	脂质	Free fatty acids	游离脂肪酸	143-07-7	3	-	80260	70530	110330	65584	83297	58462	68437	78755	71828	85358	91725	73043	82264	69022	284940	81332	79870	81428	90003	106460	89513	118320	108130	125050	77299	87999	102810	C02679	ko00061,ko01100,ko01110
NK10251888	UPLC-MS/MS	203.15	70.07	-	-	202.143	C8H18N4O2	[M+H]+	NG,NG-Dimethyl-L-arginine	NG,NG-二甲基-L-精氨酸	Amino acids and derivatives	氨基酸及其衍生物	Amino acids and derivatives	氨基酸及其衍生物	30315-93-6	3	-	1116700	1082600	3760400	292730	330080	256010	348750	208190	324740	900790	878670	795290	1291300	321720	1899000	209000	208280	161590	262700	242870	214190	940720	1320000	973570	562840	763910	799950	C03626	--
mws0018	UPLC-MS/MS	203.22	83	-	-	202.216	C10H26N4	[M+H]+	Spermine	精胺	Alkaloids	生物碱	Phenolamine	酚胺	71-44-3	3	-	10820000	9087700	10477000	7127000	5561300	7572000	10349000	11915000	11380000	10067000	10976000	10238000	12350000	11374000	12214000	6699400	6582200	6124700	12960000	12068000	13265000	10990000	10692000	12038000	9168500	10641000	11204000	C00750	ko00330,ko00410,ko00480,ko00770,ko01100,ko01240
mws0282	UPLC-MS/MS	203.08	116.05	-	-	204.09	C11H12N2O2	[M-H]-	L-Tryptophan	L-色氨酸	Amino acids and derivatives	氨基酸及其衍生物	Amino acids and derivatives	氨基酸及其衍生物	73-22-3	1	-	8464000	8962200	26148000	2709900	4072300	2148000	3140000	3121400	1880500	16633000	20715000	7797500	17589000	8715800	19065000	2136400	3023000	2763900	8030600	4730900	5405800	9279400	18912000	17711000	7073400	9640000	9137400	C00078	ko00260,ko00380,ko00400,ko00901,ko00966,ko00970,ko00998,ko01100,ko01110,ko01210,ko01230,ko01240
pmb0818	UPLC-MS/MS	206.1	147.5	-	-	205.074	C11H11NO3	[M+H]+	Methoxyindoleacetic acid	甲氧基吲哚乙酸	Alkaloids	生物碱	Plumerane	吲哚类生物碱	3471-31-6	3	-	618930	684910	2143300	139880	251310	132950	263870	216660	110250	1554200	2180500	551170	1558700	597120	1645400	129490	177760	196600	762010	340010	492180	724300	1310400	1290600	529030	678870	692880	C05660	ko00380
pme1261	UPLC-MS/MS	206.14	76	-	-	205.131	C9H19NO4	[M+H]+	D-Panthenol	D-泛酰醇	Others	其它类	Saccharides and Alcohols	糖及醇类	81-13-0	3	-	7192.7	14300	5797.2	3820	10762	25452	12703	29594	9265	18804	19757	35046	45074	22660	6000.4	22907	5470.4	31164	6227.8	6963.4	4938.5	6628.6	9910.3	11679	18263	20801	19133	C05944	ko00770
pma6599	UPLC-MS/MS	207.1	85	-	-	206.058	C11H10O4	[M+H]+	6-Hydroxymethylherniarin	6-羟甲基脱肠草素	Lignans and Coumarins	木脂素和香豆素	Coumarins	香豆素	117597-79-2	3	-	9	8535.2	6886.2	96536	87894	79213	480240	395760	449780	148320	99940	148330	3004.6	9	9	9	9	10960	16285	42119	16503	10706	10586	9	62640	108160	48552	--	--
mws4173	UPLC-MS/MS	207.07	192.04	-	-	206.058	C11H10O4	[M+H]+	5,7-Dimethoxycoumarin (Limettin)(Citropten)	5,7-二甲氧基香豆素 (柠檬内酯)(柠檬油素)	Lignans and Coumarins	木脂素和香豆素	Coumarins	香豆素	487-06-9	2	-	243180	11153000	14289000	15861000	41080000	4853200	20623000	81381000	23166000	10539000	18489000	8640300	110650	45789	312300	24848	14543	34103	132020	34064	35692	1040800	153730	1026300	12189000	13661000	14088000	--	--
mws1076	UPLC-MS/MS	207.07	151	-	-	206.058	C11H10O4	[M+H]+	Scoparone	滨蒿内酯	Lignans and Coumarins	木脂素和香豆素	Coumarins	香豆素	120-08-1	3	-	9	22359	9	41455	57985	9	49822	67429	38591	471690	188210	439520	9	9	9	9	9	9	9	17397	9	494450	599540	382640	68323	99900	102840	C09311	--
Lmbn013410	UPLC-MS/MS	205.16	189.13	-	-	206.167	C14H22O	[M-H]-	2,4-Di-Tert-Butylphenol	2,4-二叔丁基苯酚	Phenolic acids	酚酸类	Phenolic acids	酚酸类	96-76-4	2	-	135430	147360	178240	124230	138050	81904	120180	113540	82327	142800	109650	98740	80558	82872	103500	184170	128070	179670	130950	146240	137120	100320	135460	126760	107850	98111	107780	--	--
Lmln010063	UPLC-MS/MS	205.16	189.13	-	-	206.167	C14H22O	[M-H]-	2,6-Di-tert-butylphenol	2,6-二叔丁基苯酚	Phenolic acids	酚酸类	Phenolic acids	酚酸类	128-39-2	1	-	163460	176940	160830	114660	136840	99046	103160	107490	96570	113530	117700	98922	87776	74599	89148	147270	134110	154160	159930	136580	152380	134700	137990	150540	104340	120610	114980	--	--
Zmgn002106	UPLC-MS/MS	206.08	58.03	-	-	207.09	C11H13NO3	[M-H]-	N-Acetyl-L-phenylalanine	N-乙酰-L-苯丙氨酸	Amino acids and derivatives	氨基酸及其衍生物	Amino acids and derivatives	氨基酸及其衍生物	2018-61-3	1	-	291440	129410	722940	902930	394410	723250	219160	130220	372460	245050	158970	400020	310050	245080	568910	766570	530200	857720	481460	269800	712020	627070	367240	575130	304180	451850	517940	C03519	ko00360,ko01100
MA10107783	UPLC-MS/MS	207.03	119.05	-	-	208.037	C10H8O5	[M-H]-	3-[(1-Carboxyvinyl)oxy]benzoic acid	3-[(1-羧乙烯基)氧基]苯甲酸	Phenolic acids	酚酸类	Phenolic acids	酚酸类	16929-37-6	3	-	5753600	6602400	7901000	1495000	1687600	1552200	4202200	1219000	1290000	775300	389720	335130	10532000	17242000	9985800	6940700	11481000	10284000	25146000	35458000	33565000	5644100	8864000	9695700	6748600	8352300	9196800	C20772	ko00130,ko01100,ko01110,ko01240
mws2184	UPLC-MS/MS	207.07	135.1	-	-	208.074	C11H12O4	[M-H]-	Ethyl caffeate	咖啡酸乙酯	Phenolic acids	酚酸类	Phenolic acids	酚酸类	102-37-4	3	-	2330.7	5490.9	9	21627	63940	9	9	122980	5122.5	15226	19450	11511	9	9	5501.1	9	6238.2	9	9	3220.6	12986	9	9130.7	8193.1	15092	16435	18867	--	--
pmb2620	UPLC-MS/MS	207.07	133.1	-	-	208.074	C11H12O4	[M-H]-	3,4-Dimethoxycinnamic acid	3,4-二甲氧基肉桂酸	Phenolic acids	酚酸类	Phenolic acids	酚酸类	14737-89-4	3	-	15276	41042	61062	13497	17371	21606	17845	16625	42245	55390	18348	59086	21813	6880	25968	40666	23716	32578	75970	47475	96575	57308	43877	63474	32810	31410	35661	--	--
pme3443	UPLC-MS/MS	207.07	192	-	-	208.074	C11H12O4	[M-H]-	Sinapinaldehyde	芥子醛	Phenolic acids	酚酸类	Phenolic acids	酚酸类	4206-58-0	3	-	9	9	58665	1151500	1072600	581700	17684	9	9	77870	61732	128980	9	9	9141.2	838030	1282200	1025200	26596	9	33574	141280	276890	171020	137200	183080	210800	C05610	ko00940,ko01100,ko01110
Zmpn000199	UPLC-MS/MS	209.03	85.03	-	-	210.038	C6H10O8	[M-H]-	D-Galactaric acid	D-半乳糖二酸	Others	其它类	Saccharides and Alcohols	糖及醇类	526-99-8	1	-	1232900	997350	504750	3424300	2516500	4028300	3092000	10686000	3058700	11125000	15252000	13523000	2104300	2281700	4583700	2611300	2948700	3908600	17047000	14518000	17412000	21727000	27212000	24917000	8996200	12290000	12534000	C00879	ko00053,ko01100
Zmyn000108	UPLC-MS/MS	209.03	85.03	-	-	210.038	C6H10O8	[M-H]-	D-Saccharic acid	D-蔗糖酸	Others	其它类	Saccharides and Alcohols	糖及醇类	87-73-0	1	-	1526000	1195400	1484900	4120300	3561000	4336300	9624800	10424000	7913100	12888000	14829000	13579000	4336200	3657600	6694600	4007100	3215000	4887500	18645000	14275000	17926000	25810000	28521000	28698000	10432000	14171000	13980000	C00818	ko00053,ko01100
Hmcn000192	UPLC-MS/MS	209.07	59.01	-	-	210.073	C7H14O7	[M-H]-	Sedoheptulose	景天庚酮糖	Others	其它类	Saccharides and Alcohols	糖及醇类	3019-74-7	2	-	1096400	856510	866990	1499300	1060900	1712400	3584600	3971900	3033400	5241800	5373000	5402200	2193400	2147100	2675800	1034000	1103100	1938800	6743500	4972600	6159500	8751600	11390000	12012000	4165900	5274500	5384800	C02076	ko00710,ko01100
mws0853	UPLC-MS/MS	209.08	179	-	-	210.089	C11H14O4	[M-H]-	Sinapyl alcohol	芥子醇	Phenolic acids	酚酸类	Phenolic acids	酚酸类	537-33-7	2	-	306380	460960	260160	785880	1090100	1562300	204220	422870	295580	96741	127080	504600	476000	245510	320970	3476100	1589500	2062500	1079500	760300	558800	784660	261050	345510	496790	725030	625410	C02325	ko00940,ko01100,ko01110
pme1654	UPLC-MS/MS	209.12	59.02	-	-	210.126	C12H18O3	[M-H]-	Jasmonic acid	茉莉酸	Organic acids	有机酸	Organic acids	有机酸	77026-92-7	3	-	205890	111340	392060	803500	171050	2552000	1561700	178390	1277600	1450400	370350	1781900	269990	561770	479060	92391	110340	45061	116910	282110	150790	337270	447400	258970	424230	491030	506210	C08491	ko00592,ko01100,ko01110,ko04075
MWSmce355	UPLC-MS/MS	211.06	181.01	-	-	212.068	C10H12O5	[M-H]-	Methyl Syringate	丁香酸甲酯	Phenolic acids	酚酸类	Phenolic acids	酚酸类	884-35-5	3	-	9	9	9	9	9	9	9	9	9	806250	141940	394960	9	9	9	21093	18960	12246	33087	28175	16648	254090	121540	229170	124020	157760	146070	--	--
mws1512	UPLC-MS/MS	211.06	124	-	-	212.068	C10H12O5	[M-H]-	Propyl gallate	没食子酸丙酯(PG)	Phenolic acids	酚酸类	Phenolic acids	酚酸类	121-79-9	3	-	9	9	9	5235.1	9	9	9	9	9	47818	65735	18695	9	9	9	9	9	9	9	9	9	9	9	9	11869	7794.6	8365.1	C11155	--
pmb2507	UPLC-MS/MS	213.1	97	-	-	214.024	C5H11O7P	[M-H]-	2-Deoxyribose-1-phosphate	2-脱氧核糖-1-磷酸	Nucleotides and derivatives	核苷酸及其衍生物	Nucleotides and derivatives	核苷酸及其衍生物	17210-42-3	3	-	380580	894190	1385200	5035600	3908700	3829600	36548	44014	49991	359730	353690	790390	847310	1645300	359100	889870	943560	962970	34941	51470	15972	355220	459600	265370	473910	569720	578000	C00672	ko00030,ko00240,ko01100
mws0863	UPLC-MS/MS	213.02	97	-	-	214.024	C5H11O7P	[M-H]-	2-Deoxyribose-5'-phosphate	2-脱氧核糖-5'-磷酸	Nucleotides and derivatives	核苷酸及其衍生物	Nucleotides and derivatives	核苷酸及其衍生物	102916-66-5	3	-	86979	117390	93336	222710	279200	161590	39268	15349	27237	57736	34063	87035	239200	187880	175360	337940	180200	225510	7170.1	11427	7430.8	45247	40452	56640	63084	61153	85576	C00673	ko00030,ko01100
Hmln002597	UPLC-MS/MS	193.05	161.02	-	-	216.04	C10H9NaO4	[M-Na]-	Sodium ferulate	阿魏酸钠	Phenolic acids	酚酸类	Phenolic acids	酚酸类	24276-84-4	1	-	644230	1228600	1303700	396260	3453400	525130	856760	856830	628330	7137000	3283100	3178500	206200	27776	316160	410590	173620	147660	424100	178660	662590	194870	347900	257230	1389200	1540000	1540900	--	--
pme0170	UPLC-MS/MS	217.13	158	-	-	216.122	C8H16N4O3	[M+H]+	N-Acetyl-L-Arginine	N-乙酰-L-精氨酸	Amino acids and derivatives	氨基酸及其衍生物	Amino acids and derivatives	氨基酸及其衍生物	155-84-0	3	-	1751.8	1558	11204	31425	39646	19505	167720	285330	182760	32838	45133	54324	1673.3	7413.6	4899.6	7916.6	9457.7	13033	558370	142340	285820	45371	51111	18333	56122	57101	25717	--	--
mws0677	UPLC-MS/MS	219.11	160	-	-	218.106	C12H14N2O2	[M+H]+	N-Acetyl-5-hydroxytryptamine	N-乙酰-5-羟基色胺	Alkaloids	生物碱	Plumerane	吲哚类生物碱	1210-83-9	3	-	18116	45783	56664	40342	69645	31995	91599	114870	72643	258480	284040	184910	20105	9253	6028	47843	58772	59374	9	143050	9	9	9	9	15720	28753	37641	C00978	ko00380,ko01100,ko01110
MWSmce257	UPLC-MS/MS	218.11	88.04	-	-	219.111	C9H17NO5	[M-H]-	D-Pantothenic Acid	D-泛酸(维生素B5)	Others	其它类	Vitamin	维生素	79-83-4	1	-	762520	421380	1012600	1009500	621500	1343300	598060	419340	883800	1474700	915960	1180200	552450	506660	593010	384430	542570	382980	335220	486390	380610	1061300	1041100	1230900	571860	712860	722710	C00864	ko00410,ko00770,ko01100,ko01110,ko01240
pme1228	UPLC-MS/MS	221.09	204	-	-	220.085	C11H12N2O3	[M+H]+	5-Hydroxy-L-tryptophan	5-羟基-L-色氨酸	Amino acids and derivatives	氨基酸及其衍生物	Amino acids and derivatives	氨基酸及其衍生物	56-69-9	3	-	31518	32027	47794	37151	45571	35612	133910	117600	62626	622850	569150	749750	2963.5	8273.2	7063.8	26165	35525	39336	197500	147820	143070	722140	380470	873690	172960	244180	210810	C00643	ko00380,ko01100
Lmtp005226	UPLC-MS/MS	221.19	105.07	-	-	220.183	C15H24O	[M+H]+	Santalol	檀香醇	Others	其它类	Others	其它	11031-45-1	3	-	23829	13568	44192	253670	64323	291280	100110	27927	317130	161170	98143	416930	5999.1	16019	13062	82553	19014	107360	144630	75931	284460	130640	29056	80718	78193	57617	88595	--	--
pme2755	UPLC-MS/MS	222	144	-	-	221.09	C8H15NO6	[M+H]+	N-Acetyl-D-glucosamine	N-乙酰-D-葡萄糖胺	Others	其它类	Saccharides and Alcohols	糖及醇类	7512-17-6	3	-	2277000	1649700	2454500	1340700	1203000	1486200	2321700	2421200	2670500	1926400	2261700	2222800	2659000	2522800	2038300	1410900	1356900	1266700	2934500	2611800	2828600	2387500	2384900	2446500	1787000	2335300	2156200	C00140	ko00520,ko01100,ko02010
mws4174	UPLC-MS/MS	222.1	138	-	-	221.09	C8H15NO6	[M+H]+	N-Acetyl-D-mannosamine	N-乙酰-D-甘露糖胺	Others	其它类	Saccharides and Alcohols	糖及醇类	7772-94-3	3	-	74446	69424	51649	135080	150300	187510	26761	38302	47480	116930	101200	157090	115870	250790	113730	170130	193240	241680	193500	31278	55778	190600	159080	199020	130050	138260	156810	C00645	ko00520,ko01100
mws2608	UPLC-MS/MS	222.1	84.05	-	-	221.09	C8H15NO6	[M+H]+	N-Acetyl-D-galactosamine	N-乙酰-D-半乳糖胺	Others	其它类	Saccharides and Alcohols	糖及醇类	1811-31-0	3	-	264590	158870	238800	159150	136390	204930	338650	413790	443110	421560	639100	372020	386240	432290	284260	167730	155750	238740	643500	352410	668180	641130	539760	474220	245350	303630	358640	C01132	ko00052,ko01100
mws1639	UPLC-MS/MS	223.06	190	-	-	222.053	C11H10O5	[M+H]+	Isofraxidin	异嗪皮啶	Lignans and Coumarins	木脂素和香豆素	Coumarins	香豆素	486-21-5	1	-	331640	912700	1744300	799410	2044100	684780	383400	1031500	853290	2492700	1784200	1283400	228320	57899	139120	835130	2076100	638740	1216100	89273	434640	1224100	381730	605120	807950	881070	891610	C17480	--
Lmjp002764	UPLC-MS/MS	223.06	190.03	-	-	222.053	C11H10O5	[M+H]+	Umckalin (7-hydroxy-5,6-dimethoxycoumarin)	5,6-二甲氧基-7-羟基香豆素	Lignans and Coumarins	木脂素和香豆素	Coumarins	香豆素	43053-62-9	2	-	165560	589120	1141600	247800	598490	288310	46968	185100	72284	65770	85220	51100	78480	38094	83631	168120	105670	211030	164190	68372	87949	241400	162930	156880	157460	233380	278360	--	--
pmp000284	UPLC-MS/MS	223.06	208.04	-	-	222.053	C11H10O5	[M+H]+	Fraxidin (8-Hydroxy-6,7-dimethoxycoumarin)	秦皮啶	Lignans and Coumarins	木脂素和香豆素	Coumarins	香豆素	525-21-3	2	-	122190	354470	624540	344620	765820	265670	149010	391420	318730	871910	727070	511390	81438	14736	51471	370490	752040	213430	426050	24859	172820	390530	129830	219670	282810	307240	323860	C17479	--
MWS4296	UPLC-MS/MS	223.11	120.08	-	-	222.1	C11H14N2O3	[M+H]+	Glycylphenylalanine	甘氨酰苯基丙氨酸	Amino acids and derivatives	氨基酸及其衍生物	Amino acids and derivatives	氨基酸及其衍生物	3321-03-7	1	-	319730	364870	678060	1049100	1188600	1053800	1577000	1360200	1418600	1304000	1971000	1539300	105670	10728	51571	814270	799200	759130	1456400	1807400	849860	2601500	2108400	2544500	804670	1019300	903380	--	--
mws5042	UPLC-MS/MS	223.11	120.09	-	-	222.1	C11H14N2O3	[M+H]+	L-Glycyl-L-phenylalanine	L-甘氨酰-L-苯丙氨酸	Amino acids and derivatives	氨基酸及其衍生物	Amino acids and derivatives	氨基酸及其衍生物	721-66-4	1	-	312760	399760	758490	1090200	1282000	985150	947230	1269400	1295600	1107300	1670900	1694700	111680	16902	53689	692650	938150	736220	1283200	1694500	727480	2771000	1996900	2385000	874130	1071600	1052200	--	--
mws0520	UPLC-MS/MS	224.09	136	-	-	223.084	C11H13NO4	[M+H]+	N-Acetyl-L-tyrosine	N-乙酰-L-酪氨酸	Amino acids and derivatives	氨基酸及其衍生物	Amino acids and derivatives	氨基酸及其衍生物	537-55-3	3	-	4992	1067.5	8254.5	30285	57715	28814	98747	110850	86053	44264	39424	56691	5396	3856.2	8036.6	24496	22159	26224	123760	144690	148720	135160	82095	81335	38120	68687	48858	--	--
Lmmp003517	UPLC-MS/MS	225.15	95.08	-	-	224.141	C13H20O3	[M+H]+	Solatuberenol A	Solatuberenol A	Others	其它类	Others	其它	-	1	-	22432	42124	13556	34278	56313	63200	183270	269650	206800	516700	451300	832680	368140	252660	442160	1060900	2187300	1326900	7134200	5594700	3620000	3124600	3207600	1796900	1142000	1032900	1699400	--	--
Lmyp003951	UPLC-MS/MS	227.09	181.09	-	-	226.084	C11H14O5	[M+H]+	3-Hydroxy-1-(4-hydroxy-3,5-dimethoxyphenyl)propan-1-one	3-羟基-1-(4-羟基-3,5-二甲氧基苯基)丙-1-酮	Phenolic acids	酚酸类	Phenolic acids	酚酸类	-	3	-	11740	27816	23514	291870	289900	220220	90934	66456	96485	126520	112720	107550	32631	47441	39090	513350	617480	421660	287580	168390	113780	150570	104390	146650	158100	150660	157320	--	--
Lmdp002381	UPLC-MS/MS	227.09	149.06	-	-	226.084	C11H14O5	[M+H]+	Genipin	京尼平	Terpenoids	萜类	Monoterpenoids	倍萜	6902-77-8	3	-	6574.6	16409	17034	59698	52360	37641	129530	249660	113460	81519	93108	143640	10129	2317.1	30712	112740	146510	336370	518480	226010	1221500	327690	115490	785910	208010	191340	233710	C09780	--
Cmsp002787	UPLC-MS/MS	227.09	181.05	-	-	226.084	C11H14O5	[M+H]+	3,4'-Dihydroxy-3',5'-dimethoxypropiophenone	3,4'-二羟基-3',5'-二甲氧基苯乙酮	Phenolic acids	酚酸类	Phenolic acids	酚酸类	136196-47-9	1	-	25060	8039.2	6893	232440	483260	183970	183900	243850	119750	29036	13940	34930	26854	60683	48130	2097000	1372300	1303700	1907200	1110500	1200900	590650	281950	422460	502170	565100	359600	--	--
pme1194	UPLC-MS/MS	228.1	112	-	-	227.091	C9H13N3O4	[M+H]+	2'-Deoxycytidine	2'-脱氧胞苷	Nucleotides and derivatives	核苷酸及其衍生物	Nucleotides and derivatives	核苷酸及其衍生物	951-77-9	3	-	161010	150950	208910	37090	52861	55651	56155	27592	71639	94242	138930	168560	85336	40071	54254	84714	55403	75762	38054	24460	25867	115470	160470	202620	82919	82781	72872	C00881	ko00240,ko01100,ko02010
Zmnn007376	UPLC-MS/MS	227.07	93.03	-	-	228.079	C14H12O3	[M-H]-	Xanthyletin	花椒内酯	Lignans and Coumarins	木脂素和香豆素	Coumarins	香豆素	553-19-5	3	-	9	9	9	86009	34238	31998	147690	113980	91763	283010	136220	172460	9	9	9	12645	6513.5	3465.8	26956	16437	20332	32284	20965	37982	42079	54471	51144	C09317	--
Lmhp001461	UPLC-MS/MS	229.15	70.07	-	-	228.147	C11H20N2O3	[M+H]+	L-Prolyl-L-Leucine	L-脯氨酰-L-亮氨酸	Amino acids and derivatives	氨基酸及其衍生物	Amino acids and derivatives	氨基酸及其衍生物	52899-07-7	2	-	330540	405060	953170	2264000	2563900	2009600	1869200	1637300	1180000	2407900	3302100	2901700	79815	10302	25762	1602500	1871400	1533400	2211700	2040300	1470900	4067700	3543300	4127700	898310	1278100	1065600	--	--
Lmhp001670	UPLC-MS/MS	231.16	72.08	-	-	230.163	C11H22N2O3	[M+H]+	L-Valyl-L-Leucine	L-缬氨酰-L-亮氨酸	Amino acids and derivatives	氨基酸及其衍生物	Amino acids and derivatives	氨基酸及其衍生物	3989-97-7	2	-	1447900	1458100	3311000	6276100	8396600	4425000	6504900	8654000	5560900	7952600	9901700	8071100	13557	1814	7816.2	2238600	2044200	2492600	6968400	4279800	7552700	8671100	6653400	10602000	1986400	2102900	2356200	--	--
pmb0962	UPLC-MS/MS	235.1	118.3	-	-	234.158	C10H22N2O4	[M+H]+	L-Lysine-Butanoic Acid	L-赖氨酸丁酸酯	Amino acids and derivatives	氨基酸及其衍生物	Amino acids and derivatives	氨基酸及其衍生物	80407-71-2	3	-	11352	10080	14265	10556	26755	5880	82283	41883	76275	23287	24276	54077	3027.4	979.43	6843.9	41619	20665	26140	24248	19643	21526	62501	81578	79543	11715	17968	19781	--	--
ML10174588	UPLC-MS/MS	233.16	233.16	-	-	234.162	C15H22O2	[M-H]-	Confertifoline	密叶辛木素	Terpenoids	萜类	Sesquiterpenoids	倍半萜	1811-23-0	2	-	621000	700180	698400	634500	647520	596200	557910	653940	608350	727340	787960	756070	424940	379650	503370	714900	696440	775630	692530	643950	735630	789770	637400	754570	371430	393120	380340	C09376	--
Hmlp006964	UPLC-MS/MS	237.07	176.04	-	-	236.068	C12H12O5	[M+H]+	5,6,7-Trimethoxycoumarin	5,6,7-三甲氧基香豆素	Lignans and Coumarins	木脂素和香豆素	Coumarins	香豆素	55085-47-7	3	-	9	268510	79672	89243	186140	42234	18152	87056	27436	62388	26840	29166	9	9	9	9	9	9	9	9	9	149930	80061	165360	36991	51300	43911	--	--
MWSHY0202	UPLC-MS/MS	237.09	135.05	-	-	236.084	C16H12O2	[M+H]+	6-Methylflavone	6-甲基黄酮	Flavonoids	黄酮	Flavones	黄酮	29976-75-8	2	-	28795	12041	10788	29727	18752	16481	43919	30070	17523	52387	50245	13305	3309.1	3294.7	11217	26625	17793	18828	88480	55665	57414	60702	51127	40222	19175	24818	21523	--	--
mws4176	UPLC-MS/MS	237.12	120.09	-	-	236.116	C12H16N2O3	[M+H]+	L-Alanyl-L-Phenylalanine	L-丙氨酰-L-苯丙氨酸	Amino acids and derivatives	氨基酸及其衍生物	Amino acids and derivatives	氨基酸及其衍生物	3061-90-3	2	-	229440	253470	499800	588780	973140	394070	686720	1031300	587110	837460	1190100	770350	35027	1243.1	18360	354780	332810	423720	890100	434450	811210	1381000	947060	1279800	386380	498440	417140	--	--
mws0984	UPLC-MS/MS	236.08	164.06	-	-	237.086	C9H11N5O3	[M-H]-	L-Sepiapterin	L-墨喋呤	Nucleotides and derivatives	核苷酸及其衍生物	Nucleotides and derivatives	核苷酸及其衍生物	17094-01-8	3	-	9	9	9	44437	13450	23510	62033	8251.5	60322	102560	31857	51775	9	9	9	9	9	9	9	9	9	9	9	9	11551	16897	13464	C00835	ko00790,ko01100
Lmyn000160	UPLC-MS/MS	237.06	87.01	-	-	238.069	C8H14O8	[M-H]-	Mucic acid Dimethyl Ester	粘酸二甲酯	Phenolic acids	酚酸类	Phenolic acids	酚酸类	-	3	-	225300	193090	216110	1007400	798550	1021700	801910	722030	711290	1071300	1064700	946300	230360	174760	372760	835140	803660	1191200	1653600	1434600	1372500	1795200	1493700	1635500	698010	878700	851150	--	--
mws0221	UPLC-MS/MS	241.03	152	-	-	240.024	C6H12N2O4S2	[M+H]+	L-Cystine	L-胱氨酸	Amino acids and derivatives	氨基酸及其衍生物	Amino acids and derivatives	氨基酸及其衍生物	56-89-3	3	-	13062	13405	6026	6201.3	7450.7	6871.2	20502	16018	17184	9657.9	11871	7779.8	25517	25217	25826	22204	13673	43468	31842	31329	37279	22749	16909	19304	23522	12007	16997	C00491	ko00270,ko01100,ko02010
MWS0552	UPLC-MS/MS	239.2	223.03	-	-	240.209	C15H28O2	[M-H]-	Cis-10-Pentadecenoic Acid(C15: 1)	顺-10-十五碳烯酸	Lipids	脂质	Free fatty acids	游离脂肪酸	84743-29-3	2	-	185200	188260	237680	135450	160320	144420	180530	283840	148910	156850	194460	113990	152460	214550	141750	151660	191890	129120	323280	283380	326490	293570	293560	314320	235580	221080	261850	--	--
pme2827	UPLC-MS/MS	239	223	-	-	240.245	C16H32O	[M-H]-	Palmitaldehyde	棕榈醛	Lipids	脂质	Free fatty acids	游离脂肪酸	629-80-1	3	-	49532000	56935000	52875000	75026000	76584000	72724000	68397000	70099000	53143000	72197000	75417000	74248000	68876000	72616000	72694000	78990000	80244000	77880000	77787000	76937000	76337000	72090000	68015000	72628000	53425000	59150000	61026000	C00517	ko00071
pme0264	UPLC-MS/MS	243.1	127	-	-	242.09	C10H14N2O5	[M+H]+	Thymidine	胸苷	Nucleotides and derivatives	核苷酸及其衍生物	Nucleotides and derivatives	核苷酸及其衍生物	50-89-5	3	-	205240	139520	261890	195630	205990	272270	120470	40315	104090	764050	597920	913080	135980	133460	43823	334040	442840	366330	73237	68558	28981	774550	1109900	1229300	311590	328740	333490	C00214	ko00240,ko01100
Zmcp102602	UPLC-MS/MS	243.17	91.05	-	-	242.167	C17H22O	[M+H]+	Bupleurynol	柴胡炔醇	Others	其它类	Others	其它	-	2	-	5100400	12469000	6585000	1740400	2055600	2024800	1083100	2252600	1813100	1582000	1014100	2405700	16713000	14243000	17792000	3884200	2163700	3093200	3145600	904900	6278000	4229400	910650	2835200	4978400	5168400	5805000	--	--
mws0359	UPLC-MS/MS	241.22	241.22	-	-	242.225	C15H30O2	[M-H]-	Pentadecanoic Acid	十五烷酸	Lipids	脂质	Free fatty acids	游离脂肪酸	1002-84-2	3	-	51040	81427	147240	125280	174510	105720	54045	49222	64425	65938	75651	68976	39438	55123	36824	79702	99813	71147	56362	51990	59870	81793	82801	89824	79016	93345	105460	C16537	--
MWS2430	UPLC-MS/MS	241.22	241.21	-	-	242.225	C15H30O2	[M-H]-	13-methylmyristic acid	13-甲基十四烷酸	Lipids	脂质	Free fatty acids	游离脂肪酸	2485-71-4	2	-	74362	102530	177840	48335	44507	36208	63908	39084	35078	36173	54461	33554	26973	24351	22695	32601	52186	47168	34629	67459	61077	25755	32690	41058	47103	55145	60890	--	--
pme3732	UPLC-MS/MS	244.09	112	-	-	243.086	C9H13N3O5	[M+H]+	Cytidine	胞苷	Nucleotides and derivatives	核苷酸及其衍生物	Nucleotides and derivatives	核苷酸及其衍生物	65-46-3	2	-	1797200	2313800	1353800	8740700	11876000	11381000	26295000	26411000	27742000	12354000	21306000	23263000	2107800	2623600	1992700	10130000	7878800	14524000	33121000	16715000	15498000	18549000	10626000	13842000	12103000	17215000	15826000	C00475	ko00240,ko01100,ko02010
ML10180524	UPLC-MS/MS	244.09	112.05	-	-	243.086	C9H13N3O5	[M+H]+	Cytarabine	胞嘧啶阿拉伯糖苷	Nucleotides and derivatives	核苷酸及其衍生物	Nucleotides and derivatives	核苷酸及其衍生物	147-94-4	1	-	639360	543300	888400	2454100	2658200	3177500	19244000	15129000	19579000	8613900	15941000	11880000	617400	554420	467820	2416000	2280900	3131200	31034000	15204000	17355000	18876000	8813400	13717000	6517300	6497000	4972500	C02961	--
mws0976	UPLC-MS/MS	243.06	153	-	-	244.07	C9H12N2O6	[M-H]-	β-Pseudouridine	β-假尿苷	Nucleotides and derivatives	核苷酸及其衍生物	Nucleotides and derivatives	核苷酸及其衍生物	1445-07-4	3	-	63865	73238	156750	150110	181180	217900	271290	189870	359680	263090	328870	594230	83475	143070	68712	203160	138400	145570	217290	182720	226580	379320	295200	106830	146150	177880	201570	C02067	ko00240,ko01100
mws0248	UPLC-MS/MS	243.06	110	-	-	244.07	C9H12N2O6	[M-H]-	Uridine	尿嘧啶核苷	Nucleotides and derivatives	核苷酸及其衍生物	Nucleotides and derivatives	核苷酸及其衍生物	58-96-8	1	-	591290	796700	1209300	1247100	1530300	1760200	2726800	1898700	2141100	2380600	3181400	3086000	809070	1379600	636510	1281300	1362100	1539900	2508300	1451500	2032200	3265700	2574100	2522100	1214200	1377000	1903500	C00299	ko00240,ko01100,ko02010
MWSmce295	UPLC-MS/MS	245.07	113.03	-	-	244.07	C9H12N2O6	[M+H]+	1-beta-D-Arabinofuranosyluracil	1-β-D-阿糖呋喃脲嘧啶	Nucleotides and derivatives	核苷酸及其衍生物	Nucleotides and derivatives	核苷酸及其衍生物	3083-77-0	2	-	1653800	1561900	1827300	5025100	5381600	5723900	3582100	3445900	4668500	3789400	4312900	6231700	1679600	2910500	1183300	4209600	4173200	4436200	4579000	2943200	2182800	5309800	3820900	4090800	3372200	3923600	3752200	C16908	--
pme2266	UPLC-MS/MS	245.1	227	-	-	244.088	C10H16N2O3S	[M+H]+	Biotin	D-生物素	Others	其它类	Vitamin	维生素	58-85-5	3	-	222090	176470	354370	75542	114800	157500	67466	68452	99056	331500	504080	616370	74262	132470	52314	68314	63480	71872	70935	91689	64484	386750	513580	485180	143710	129860	136240	C00120	ko00780,ko01100,ko01240,ko02010
Lmhp002031	UPLC-MS/MS	245.18	86.1	-	-	244.179	C12H24N2O3	[M+H]+	L-Leucyl-L-Leucine	L-亮氨酰-L-亮氨酸	Amino acids and derivatives	氨基酸及其衍生物	Amino acids and derivatives	氨基酸及其衍生物	3303-31-9	1	-	470640	959130	1029100	2177800	2934900	948550	2819500	3583700	1962900	6226500	7856000	2765900	9	9	9	796000	692860	1530200	4393400	2094400	5873000	4560100	3580400	6823100	405180	597990	492180	--	--
pmb2591	UPLC-MS/MS	245.09	203.2	-	-	246.1	C13H14N2O3	[M-H]-	N-Acetyl-L-Tryptophan	N-乙酰-L-色氨酸	Amino acids and derivatives	氨基酸及其衍生物	Amino acids and derivatives	氨基酸及其衍生物	1218-34-4	1	-	465060	192680	805800	344790	221680	591100	138660	77935	85430	222510	34212	406920	1716400	282780	4849500	1730300	2707400	1690900	1735800	1460800	744800	799000	2437300	1087100	503040	734440	508810	--	--
Lmrj002087	UPLC-MS/MS	247.13	86.09	-	-	246.121	C10H18N2O5	[M+H]+	L-Isoleucyl-L-Aspartate	L-异亮氨酰-L-天冬氨酸	Amino acids and derivatives	氨基酸及其衍生物	Amino acids and derivatives	氨基酸及其衍生物	-	2	-	181140	285750	575160	1139200	1242500	1028500	1029200	855490	813940	1401000	1811000	1974900	102270	81157	58740	480720	661490	371680	418330	339020	326220	1896500	1877900	1755200	683240	743050	690530	--	--
pme3961	UPLC-MS/MS	252.11	136	-	-	251.102	C10H13N5O3	[M+H]+	2'-Deoxyadenosine	2'-脱氧腺苷	Nucleotides and derivatives	核苷酸及其衍生物	Nucleotides and derivatives	核苷酸及其衍生物	958-09-8	1	-	822890	708180	1182600	1608000	1871000	2156100	385600	250470	196250	2994500	4460100	5843000	762240	457150	325820	3591700	4081000	3635900	647290	624440	334670	5507100	5760800	7377200	2028300	2195600	2269500	C00559	ko00230,ko01100,ko02010
pma3101	UPLC-MS/MS	256.2	124.1	-	-	256.082	C11H14NO6+	[M+H]+	Nicotinate D-ribonucleoside	烟酸核糖核苷	Others	其它类	Vitamin	维生素	17720-18-2	3	-	17614000	16208000	9940300	15259000	15114000	15237000	15365000	17962000	17007000	13594000	11385000	17740000	28616000	30164000	30561000	13870000	14305000	16930000	19159000	13127000	10524000	21290000	17045000	18188000	16081000	17275000	16736000	C05841	ko00760,ko01100
mws1488	UPLC-MS/MS	255.23	237.22	-	-	256.24	C16H32O2	[M-H]-	Palmitic acid	棕榈酸	Lipids	脂质	Free fatty acids	游离脂肪酸	57-10-3	2	-	18173	20324	28581	22768	31220	26020	11326	13687	14670	13219	20321	24376	19885	18285	14029	18208	30360	22260	21755	21817	22168	27884	23873	33365	21532	27317	21487	C00249	ko00061,ko00062,ko00071,ko00073,ko01040,ko01100,ko01212
mws0120	UPLC-MS/MS	258.11	104.11	-	-	257.103	C8H20NO6P	[M+H]+	Choline Alfoscerate	甘磷酸胆碱 GPC	Lipids	脂质	PC	磷脂酰胆碱	28319-77-9	3	-	247120	800490	625300	256440	481660	168540	62762	21940	42667	352970	236480	335870	211090	427960	254820	136290	85241	122480	43397	37670	21933	317550	754950	338250	274000	278140	280950	C00670	ko00564,ko00565
pme1187	UPLC-MS/MS	257.08	124	-	-	258.085	C10H14N2O6	[M-H]-	5-Methyluridine	5-甲基尿苷	Nucleotides and derivatives	核苷酸及其衍生物	Nucleotides and derivatives	核苷酸及其衍生物	1463-10-1	3	-	9	9	9	9724.1	13552	8296.8	27571	28493	20337	10163	26408	20387	9	9	9	13103	10180	12853	22566	12562	12567	31087	14931	23352	12038	12605	9377.5	--	--
mws1090	UPLC-MS/MS	259.02	97	-	-	260.03	C6H13O9P	[M-H]-	Glucose-1-phosphate	葡萄糖-1-磷酸	Others	其它类	Saccharides and Alcohols	糖及醇类	59-56-3	3	-	2841700	2491800	3388900	201130	359850	510130	99638	92902	114530	306760	405460	342050	1197600	2535400	1208400	85592	118390	106510	59840	46916	43941	417220	618260	302760	598370	705530	657690	C00103	ko00010,ko00040,ko00052,ko00500,ko00520,ko00523,ko00561,ko01100,ko01110,ko01240
mws0866	UPLC-MS/MS	259.02	97	-	-	260.03	C6H13O9P	[M-H]-	D-Glucose 6-phosphate	D-葡萄糖-6-磷酸	Others	其它类	Saccharides and Alcohols	糖及醇类	56-73-5	3	-	2453300	2319500	3163700	187290	397410	591710	92160	103330	112950	266150	351480	345800	1217800	2404500	1157900	102690	83988	95338	53173	69444	38134	424980	622710	284270	548110	738770	725730	C00092	ko00500,ko00524,ko00562,ko00998,ko01100,ko01110
pme3313	UPLC-MS/MS	259	97	-	-	260.03	C6H13O9P	[M-H]-	D-Fructose 6-phosphate	D-果糖-6-磷酸	Others	其它类	Saccharides and Alcohols	糖及醇类	643-13-0	3	-	1736400	942190	1419400	110590	215850	164230	53518	50233	39175	132620	113240	99859	541220	619590	635060	84908	71835	89228	29987	48285	34297	562440	142920	214560	307520	450100	380760	C00085	ko00052,ko00500,ko00710,ko01100,ko01110,ko01200
Zmdp002216	UPLC-MS/MS	261.14	86.1	-	-	260.137	C11H20N2O5	[M+H]+	L-γ-Glutamyl-L-leucine	L-γ-谷氨酰胺-L-亮氨酸	Amino acids and derivatives	氨基酸及其衍生物	Amino acids and derivatives	氨基酸及其衍生物	2566-39-4	1	-	157190	183730	274840	48903	115210	100600	103870	32297	35042	22728	94482	274690	332250	111530	309380	66878	56302	32497	70328	43030	41312	175010	149830	157290	112660	136120	141250	--	--
Lmhp001732	UPLC-MS/MS	263.13	70.07	-	-	262.132	C14H18N2O3	[M+H]+	L-Prolyl-L-Phenylalanine	L-脯氨酰-L-苯丙氨酸	Amino acids and derivatives	氨基酸及其衍生物	Amino acids and derivatives	氨基酸及其衍生物	13589-02-1	2	-	47706	51765	72671	95420	197540	94488	179060	393120	194220	153490	263840	160290	30620	22306	29006	116520	134900	97959	274300	175570	134260	373210	478940	432400	118600	129720	141780	--	--
Lmtn004049	UPLC-MS/MS	263.13	204.12	-	-	264.136	C15H20O4	[M-H]-	Abscisic acid	脱落酸	Organic acids	有机酸	Organic acids	有机酸	21293-29-8	3	-	9213.5	6930.2	14598	36828	16835	14736	38924	15431	12282	453660	163160	402790	7360.6	18375	28843	17216	30224	19221	27181	37187	21237	235460	112040	178650	69467	76637	90857	C06082	ko00906,ko01100,ko01110,ko04075
Lmhp002001	UPLC-MS/MS	265.15	72.08	-	-	264.147	C14H20N2O3	[M+H]+	L-Valyl-L-Phenylalanine	L-缬氨酰-L-苯丙氨酸	Amino acids and derivatives	氨基酸及其衍生物	Amino acids and derivatives	氨基酸及其衍生物	3918-92-1	2	-	473470	524750	885830	1659200	2051400	808350	3336400	3741300	2417600	2288300	2778300	2150200	5288.3	1651.5	9332.6	495400	492280	640900	2368000	1322300	2820400	1660900	1529700	2740100	365900	482380	445990	--	--
pmp001244	UPLC-MS/MS	266.13	207.06	-	-	266.124	C14H20NO4+	[M]+	Caffeoylcholine	咖啡酰胆碱	Alkaloids	生物碱	Alkaloids	生物碱	87189-10-4	3	-	9	9	9	9	9	9	9	9	9	27948	23542	9	9	12575	9	12394	37353	67619	70487	53128	342960	40106	14105	341330	52510	53732	54110	--	--
pme0230	UPLC-MS/MS	268.1	136.06	-	-	267.097	C10H13N5O4	[M+H]+	Adenosine	腺苷	Nucleotides and derivatives	核苷酸及其衍生物	Nucleotides and derivatives	核苷酸及其衍生物	58-61-7	1	-	4333400	4175900	5723200	6973400	6685600	6908300	5037000	5558900	1027100	13837000	18965000	13813000	5720600	6272400	3454700	4739600	5789700	5142900	12880000	12588000	9399700	20060000	16848000	17150000	7561700	8316000	7864700	C00212	ko00230,ko01100,ko02010
pme1184	UPLC-MS/MS	268.1	152	-	-	267.097	C10H13N5O4	[M+H]+	2'-Deoxyguanosine	2'-脱氧鸟苷	Nucleotides and derivatives	核苷酸及其衍生物	Nucleotides and derivatives	核苷酸及其衍生物	961-07-9	3	-	532100	468770	757760	458260	480520	536090	251240	147700	267360	1485400	1946900	2085700	376460	201750	111340	858750	1022200	936450	205960	197370	129390	1776800	2472200	2699600	723910	655090	735110	C00330	ko00230,ko01100,ko02010
pme2890	UPLC-MS/MS	269.06	136	-	-	268.055	C8H16N2O4S2	[M+H]+	L-Homocystine	L-高胱氨酸	Amino acids and derivatives	氨基酸及其衍生物	Amino acids and derivatives	氨基酸及其衍生物	626-72-2	3	-	59736	82265	74140	270200	213350	159880	158020	166210	139430	173800	205930	149670	3666.5	8204.9	14708	146910	129870	134840	230160	123720	140660	302830	196060	341800	64587	45863	68515	C01817	ko00270
Zmyn003693	UPLC-MS/MS	267.07	252.04	-	-	268.074	C16H12O4	[M-H]-	6-Hydroxy-2'-methoxyflavone	6-羟基-2'-甲氧基黄酮	Flavonoids	黄酮	Flavones	黄酮	61546-59-6	3	-	9	9	9	9	9	9	9	9	9	9	9	9	11320	10743	9863.7	9	9	9	9	9	9	9	9	9	23992	27375	30880	C15203	--
mws1060	UPLC-MS/MS	267.07	135	-	-	268.081	C10H12N4O5	[M-H]-	9-(Arabinosyl)hypoxanthine	9-(阿拉伯糖基)次黄嘌呤	Nucleotides and derivatives	核苷酸及其衍生物	Nucleotides and derivatives	核苷酸及其衍生物	7013-16-3	1	-	6063200	118790	1299800	220700	298030	217080	235630	435510	321200	483360	856520	586900	373970	394690	169910	209070	213470	179830	257650	291120	279310	836650	572910	658400	440980	566400	634060	--	--
mws1175	UPLC-MS/MS	271.1	167.04	-	-	270.089	C16H14O4	[M+H]+	Pinostrobin	球松素	Flavonoids	黄酮	Flavanones	二氢黄酮	480-37-5	3	-	1285.7	4181.8	10096	10320	21774	81403	61081	74394	30891	15166	31834	23559	9	9	9	5547.7	3847.7	6963.1	13071	9968.5	17315	8194	9	5140.9	15748	17392	16612	C16419	ko00941
MWS20159	UPLC-MS/MS	271.12	91.05	-	-	270.11	C13H18O6	[M+H]+	Phenyl-β-D-glucopyranoside	苄基 β-D-吡喃葡萄糖苷	Others	其它类	Others	其它	-	2	-	78513	52354	57618	41637	50822	48822	87447	66258	130400	55084	29898	91325	12983	20807	30913	43853	39910	30705	49953	78516	69371	45711	43313	50058	66290	44017	43108	--	--
mws1297	UPLC-MS/MS	269.1	101.02	-	-	270.11	C13H18O6	[M-H]-	Benzyl glucoside	苄基葡萄糖苷	Phenolic acids	酚酸类	Phenolic acids	酚酸类	4304-12-5	2	-	9815.2	10472	1963	28145	17022	13206	39305	53635	66946	60464	34099	29805	6899.2	3955.5	4590.2	87415	74133	57167	90569	64717	50061	41794	18916	29446	54222	80372	65368	--	--
pme2960	UPLC-MS/MS	273.08	153	-	-	272.068	C15H12O5	[M+H]+	Naringenin chalcone; 2',4,4',6'-Tetrahydroxychalcone	柚皮素查耳酮	Flavonoids	黄酮	Chalcones	查耳酮	73692-50-9	1	-	9	9	9	9	4004.5	9	9	9	9	3479000	5066000	865140	9	9	9	9	6092.2	14350	9	9	9	433970	1500400	730630	360210	393850	391340	C06561	ko00941,ko01100,ko01110
pme0376	UPLC-MS/MS	271.06	151	-	-	272.068	C15H12O5	[M-H]-	Naringenin (5,7,4'-Trihydroxyflavanone)	柚皮素	Flavonoids	黄酮	Flavanones	二氢黄酮	480-41-1	1	-	1511.4	5713.1	9124.6	22893	57786	15657	86788	41844	22633	9805200	14045000	5143100	1324.6	12005	2559.5	20552	33097	89332	65110	44273	21815	7446400	5630700	3615700	1834300	2195500	2148100	C00509	ko00941,ko00943,ko01100,ko01110
mws0914	UPLC-MS/MS	271.06	151	-	-	272.068	C15H12O5	[M-H]-	Pinobanksin	短叶松素	Flavonoids	黄酮	Flavanonols	二氢黄酮醇	548-82-3	1	-	9	1562.8	1576	256.67	3131.7	550.29	2062.3	1321.5	806.98	1851400	2551800	610910	9	919.12	9	2360.2	3720.2	16264	590.69	935.5	1385.6	273320	855400	465310	203760	266550	241520	C09826	ko00941
MWSmce675	UPLC-MS/MS	271.08	108.02	-	-	272.09	C12H16O7	[M-H]-	Arbutin	熊果苷	Phenolic acids	酚酸类	Phenolic acids	酚酸类	497-76-7	2	-	140810	122970	67155	112230	204670	79054	94817	99182	76378	71394	65450	62892	43440	34889	32009	311640	218950	180140	118550	66273	144040	50684	39601	50725	69300	72474	83460	C06186	ko00010
Lmmn003323	UPLC-MS/MS	271.23	225.22	-	-	272.235	C16H32O3	[M-H]-	2-Hydroxyhexadecanoic acid	2-羟基十六烷酸	Organic acids	有机酸	Organic acids	有机酸	764-67-0	2	-	2114400	2400800	7109100	7034100	8070900	9260500	525390	705290	634940	2472600	3772500	2386600	4120000	6090700	4315800	3281000	5172000	4214900	965390	851860	624260	5210900	5450500	2973700	2972400	3277100	3403800	--	--
pmp001264	UPLC-MS/MS	274.27	256.27	-	-	273.267	C16H35NO2	[M+H]+	Hexadecylsphingosine	十六烷基鞘胺醇	Lipids	脂质	Sphingolipids	鞘脂	-	2	-	2895400	3334100	3395800	2658700	3527200	2962000	3310700	3855700	2878000	2914100	3632500	2937100	2628400	2927400	2746900	3211100	3042100	4111400	3372300	3774400	3219900	3378100	2966400	3744500	3133300	3483600	3795700	--	--
pmb1452	UPLC-MS/MS	275.1	213.2	-	-	273.267	C16H35NO2	[M+H]+	N-Lauryldiethanolamine	十二烷基乙醇胺	Lipids	脂质	Free fatty acids	游离脂肪酸	1541-67-9	3	-	60271	74278	57603	57990	74980	61625	67229	82575	19943	62726	48642	50763	52659	52984	53730	69371	71049	91923	49792	75316	83961	48851	60532	65597	35757	47312	37599	--	--
Smjp003318	UPLC-MS/MS	279.12	149.02	-	-	278.115	C15H18O5	[M+H]+	hieracin II	hieracin II	Terpenoids	萜类	Sesquiterpenoids	倍半萜	-	2	-	753040	782800	950090	994860	799600	873450	684250	567020	836370	866900	742380	842750	831030	1005400	833220	902090	846580	964150	722660	958620	763230	825860	786420	599100	706970	926840	880700	--	--
mws1038	UPLC-MS/MS	277.12	146	-	-	278.13	C11H22N2O4S	[M-H]-	Pantetheine	泛酰巯基乙胺	Others	其它类	Others	其它	496-65-1	1	-	9	9	9	12305	17150	9	63411	56588	36105	135910	126690	117800	9	9	9	4305.4	9006	26559	28955	41754	56775	47516	48312	96538	31832	25672	36940	C00831	ko00332,ko00770,ko01110
MWSmce341	UPLC-MS/MS	279.16	149.03	-	-	278.152	C16H22O4	[M+H]+	Butyl isobutyl phthalate	邻苯二甲酸-1-丁酯-2-异丁酯	Others	其它类	Others	其它	17851-53-5	1	-	10532000	10239000	12047000	7719100	9156300	8326300	9283300	11322000	11619000	8533400	9273800	10318000	5262400	5829900	5879800	10372000	9569600	13659000	16262000	22821000	12071000	15998000	13612000	17084000	7671900	8887300	8976500	--	--
pmp001230	UPLC-MS/MS	279.16	121	-	-	278.152	C16H22O4	[M+H]+	Senkyunolide M	洋川芎内酯 M	Others	其它类	Others	其它	146986-60-9	1	-	789180	1032500	989000	858430	837540	703470	944610	1056200	1042100	848030	911440	947520	468380	518880	608580	1016600	994120	1194600	1509300	2073800	1078700	1497500	1102100	1739300	770840	767250	887930	--	--
Lmxp011770	UPLC-MS/MS	279.16	149.02	-	-	278.152	C16H22O4	[M+H]+	Diisobutyl phthalate	邻苯二甲酸二异丁酯	Phenolic acids	酚酸类	Phenolic acids	酚酸类	84-69-5	1	-	8752700	9350400	11647000	8432000	9978700	8170700	8665600	10163000	10348000	8361700	7464400	9889900	5790300	5844000	5836700	11143000	11367000	12134000	16464000	21918000	12788000	15518000	12030000	18382000	7280900	9341500	7902400	C15205	--
Lmlp012720	UPLC-MS/MS	279.16	149.02	-	-	278.152	C16H22O4	[M+H]+	Dibutyl phthalate	邻苯二甲酸二丁酯	Phenolic acids	酚酸类	Phenolic acids	酚酸类	84-74-2	1	-	7411800	7827800	9762400	5909100	7886000	6870200	7906400	8453000	8830000	7097500	7141300	8258300	5130300	4986500	4359500	8204600	8575600	9827800	11400000	18058000	10025000	13697000	10892000	16418000	6518100	7680600	6776200	C14214	--
mws5035	UPLC-MS/MS	279.17	120.08	-	-	278.163	C15H22N2O3	[M+H]+	L-Leucyl-L-phenylalanine	L-亮氨酰-L-苯丙氨酸	Amino acids and derivatives	氨基酸及其衍生物	Amino acids and derivatives	氨基酸及其衍生物	56217-82-4	3	-	4751.5	5724.1	14565	33149	33325	25838	44297	72327	49656	45469	74576	30480	4516.8	17296	5455.5	3114	20337	14149	38623	29158	19093	59296	19305	12531	24934	39568	27286	--	--
MWSmce692	UPLC-MS/MS	277.22	59.01	-	-	278.225	C18H30O2	[M-H]-	γ-Linolenic Acid	γ-亚麻酸	Lipids	脂质	Free fatty acids	游离脂肪酸	506-26-3	2	-	7606.3	8863.7	52448	170820	263420	179230	205130	233650	143370	212750	318120	224890	15673	25030	16177	149820	126950	146060	249060	179260	214280	208150	157030	166870	83678	96736	101180	C06426	ko00591,ko01040,ko01100
pmb0889	UPLC-MS/MS	279.23	95.1	-	-	278.225	C18H30O2	[M+H]+	Punicic acid (9Z,11E,13Z-octadecatrienoic acid)	石榴酸 (9Z,11E,13Z-十八碳三烯酸)	Lipids	脂质	Free fatty acids	游离脂肪酸	544-72-9	3	-	359480	541730	1824700	2468500	2470600	2047100	1017100	761050	1198300	2936700	1725500	5341100	958100	482190	677180	2239900	1538300	1610700	1216200	862320	654450	7801200	4027100	7198200	1502300	1651700	1943700	C08364	--
pmb1650	UPLC-MS/MS	279.2	149.4	-	-	278.225	C18H30O2	[M+H]+	Octadeca-11E,13E,15Z-trienoic acid	十八碳-9E,13E,15Z-三烯酸	Lipids	脂质	Free fatty acids	游离脂肪酸	25575-00-2	3	-	2870800	2785900	3242200	2380100	2787200	2327400	2865000	2845500	3140000	2395600	2508800	2816700	1370500	1335900	1532700	2773800	2823200	3336200	4102400	6449400	3631200	4213600	3748400	4828000	2090800	2437200	2267700	--	--
Lmbn005923	UPLC-MS/MS	277.22	59.01	-	-	278.225	C18H30O2	[M-H]-	Crepenynic acid	顺式十八碳-9-烯-12-炔酸	Lipids	脂质	Free fatty acids	游离脂肪酸	2277-31-8	1	-	7632.9	12860	49349	192370	282040	190820	214300	272600	167270	230910	345600	261650	22575	28622	15111	154160	145350	167940	284160	203250	212430	219980	151920	221170	98912	114370	113710	C07289	ko00591
mws0629	UPLC-MS/MS	281.11	166	-	-	280.106	C13H16N2O5	[M+H]+	L-Aspartyl-L-Phenylalanine	L-天冬氨酰-L-苯丙氨酸	Amino acids and derivatives	氨基酸及其衍生物	Amino acids and derivatives	氨基酸及其衍生物	13433-09-5	3	-	72043	85502	234890	501140	408860	419660	188840	185570	196650	438210	608260	647670	20834	8438	17616	182510	208050	193690	141950	105940	99566	729770	713210	793240	185810	223330	230940	--	--
Lmbn006152	UPLC-MS/MS	279.23	59.01	-	-	280.24	C18H32O2	[M-H]-	(9Z,11E)-Octadecadienoic acid	(9Z,11E)-十八碳二烯酸	Lipids	脂质	Free fatty acids	游离脂肪酸	2540-56-9	1	-	5644.5	12869	24236	12064	18077	13942	9422.6	8097.8	10576	23848	35292	27250	10797	16966	9316.3	16893	14450	14204	18673	13381	22133	41788	33105	42738	16418	22049	19827	C04056	ko00591
mws1491	UPLC-MS/MS	279.23	279.23	-	-	280.24	C18H32O2	[M-H]-	Linoleic acid	亚油酸	Lipids	脂质	Free fatty acids	游离脂肪酸	60-33-3	3	-	9655900	20392000	32485000	16463000	30674000	20617000	11564000	15245000	11682000	31349000	44167000	34553000	15644000	22507000	14075000	22105000	22126000	20876000	29487000	19591000	30114000	61473000	51887000	56772000	25234000	25624000	28448000	C01595	ko00591,ko01040,ko01100
Hmhp001812	UPLC-MS/MS	282.12	136.06	-	-	281.112	C11H15N5O4	[M+H]+	2'-O-Methyladenosine	2-甲氧基腺苷	Nucleotides and derivatives	核苷酸及其衍生物	Nucleotides and derivatives	核苷酸及其衍生物	2140-79-6	1	-	112270	110090	150510	1162000	1494300	1064200	2619100	1993400	1901700	2138400	2820600	2899100	126960	128640	88122	993600	846890	643500	3257200	1237700	1064900	2924000	2016400	2160400	1190200	1385400	1265200	--	--
MWS4354	UPLC-MS/MS	282.12	150.08	-	-	281.112	C11H15N5O4	[M+H]+	N6-methyladenosine	N6-甲基腺苷	Nucleotides and derivatives	核苷酸及其衍生物	Nucleotides and derivatives	核苷酸及其衍生物	1867-73-8	1	-	84659	58921	92726	770340	699790	900080	1437300	1578400	1521600	1257700	2497900	2074200	72535	107810	64163	760000	686430	684830	1876000	1375000	1163100	2004600	1665100	1731900	931070	1105100	1097200	--	--
YC512118	UPLC-MS/MS	282.28	247.24	-	-	281.272	C18H35NO	[M+H]+	Oleamide (9-Octadecenamide)	油酸酰胺 (9-十八碳烯酰胺)	Lipids	脂质	Free fatty acids	游离脂肪酸	301-02-0	1	-	2876.2	3853.9	5072.9	7101.1	5045.1	4948.7	5119.8	4127.8	3300.6	4360.8	4153.5	4455.1	3046	5138.2	4451.9	5185.7	5560	8225.9	5860.6	9588.4	5965.3	8844.6	6521.2	6830.5	5862.5	6704.2	7990	C19670	--
mws2623	UPLC-MS/MS	281.25	281.25	-	-	282.256	C18H34O2	[M-H]-	11-Octadecanoic acid(Vaccenic acid)	11-十八碳烯酸	Lipids	脂质	Free fatty acids	游离脂肪酸	506-17-2	3	-	2019500	2482700	5625000	1591300	2765700	1922900	1045100	719500	990500	1809400	3100900	2734500	4154300	5662900	2474500	1903400	2794000	1424500	2092200	1721700	2858600	8424400	3804300	3200700	2326100	3045900	2869700	C21944	--
pme1178	UPLC-MS/MS	284.1	152	-	-	283.092	C10H13N5O5	[M+H]+	Guanosine	鸟苷	Nucleotides and derivatives	核苷酸及其衍生物	Nucleotides and derivatives	核苷酸及其衍生物	118-00-3	1	-	11014000	9191400	17596000	61401000	67775000	62931000	111180000	129680000	111390000	118630000	129100000	119440000	14358000	18576000	8541000	50819000	52343000	52105000	111320000	91507000	87646000	132000000	113820000	118330000	74390000	71148000	68588000	C00387	ko00230,ko01100,ko02010
MWSmce333	UPLC-MS/MS	284.1	152.06	-	-	283.092	C10H13N5O5	[M+H]+	Crotonoside; 2-Hydroxyadenosine	巴豆苷; 2-羟基腺苷	Nucleotides and derivatives	核苷酸及其衍生物	Nucleotides and derivatives	核苷酸及其衍生物	1818-71-9	1	-	2522900	2165300	1860100	16681000	19054000	15617000	32738000	34140000	30574000	28081000	31484000	28338000	2484100	4532700	1588600	14637000	13193000	16427000	33560000	23972000	18780000	28993000	23576000	26996000	19927000	21584000	22605000	C08432	--
mws0051	UPLC-MS/MS	285.08	270	-	-	284.068	C16H12O5	[M+H]+	Acacetin	金合欢素	Flavonoids	黄酮	Flavones	黄酮	480-44-4	3	-	9	9	9	9	31628	8682.5	15482	9	14292	19038	9	20004	9	9	122470	25086	11852	14449	109030	16803	36422	93964	13191	40595	24268	22113	26235	C01470	ko00944
pme3250	UPLC-MS/MS	285.08	270	-	-	284.068	C16H12O5	[M+H]+	Biochanin A	鹰嘴豆芽素 A	Flavonoids	黄酮	Isoflavones	异黄酮	491-80-5	3	-	9	9	9	9	41090	9	10179	9	9	9	9	15065	9	9	127500	23951	8698.3	11506	73442	9	30762	64140	6847.5	23547	20580	17063	18566	C00814	ko00943,ko01100,ko01110
mws0129	UPLC-MS/MS	285.08	270	-	-	284.068	C16H12O5	[M+H]+	Genkwanin (Apigenin 7-methyl ether)	芫花素 (5,4'-二羟基-7-甲氧基黄酮)	Flavonoids	黄酮	Flavones	黄酮	437-64-9	3	-	9	9259.8	9	7111	43092	6221	14322	9	7413.3	11799	9	18915	9	9	102270	13084	7528.8	19429	115260	21904	39336	82371	10318	33007	18073	15637	20342	C10046	--
mws4160	UPLC-MS/MS	285.08	270.07	-	-	284.068	C16H12O5	[M+H]+	Wogonin (5,7-Dihydroxy-8-Methoxyflavone)	汉黄芩素 (5,7-二羟基-8-甲氧基黄酮)	Flavonoids	黄酮	Flavones	黄酮	632-85-9	3	-	9	9884.6	9	9	46841	9	13499	9	4948.1	13517	9	9057.5	9	9	114360	18261	6042.5	11753	82755	8724.6	23894	61268	9	33096	11263	9773.5	9869.9	C10197	--
mws0918	UPLC-MS/MS	283.06	268	-	-	284.068	C16H12O5	[M-H]-	Prunetin (5,4'-Dihydroxy-7-methoxyisoflavone)	樱黄素	Flavonoids	黄酮	Isoflavones	异黄酮	552-59-0	3	-	9	9	9	25170	12549	16721	28143	9	13975	57629	9	18603	9	6876.7	46036	81850	40086	48878	248360	44359	102720	159180	23777	70316	24704	26301	26892	C10521	ko00943
mws0668	UPLC-MS/MS	283.07	151	-	-	284.076	C10H12N4O6	[M-H]-	Xanthosine	黄苷	Nucleotides and derivatives	核苷酸及其衍生物	Nucleotides and derivatives	核苷酸及其衍生物	146-80-5	1	-	9218100	128930	1352300	176920	390540	80406	126070	223370	73043	1434700	1454900	595360	667590	335020	456490	330470	174500	431730	232210	302620	422840	798820	2250500	1436900	602340	777440	738210	C01762	ko00230,ko00232,ko01100,ko01110,ko02010
mws1505	UPLC-MS/MS	283.1	135	-	-	284.105	C17H16O4	[M-H]-	Phenethyl caffeate	咖啡酸苯乙酯	Phenolic acids	酚酸类	Phenolic acids	酚酸类	104594-70-9	3	-	9	9	9	9	3660.2	76508	30914	7679	1613.3	9912	9	2580.9	9	9	12594	9	9	9	9	9	4899	9	9	9	4874.1	5005.2	4581.5	C10484	--
mws1489	UPLC-MS/MS	283.26	283.26	-	-	284.272	C18H36O2	[M-H]-	Stearic Acid	硬脂酸(十八烷酸)	Lipids	脂质	Free fatty acids	游离脂肪酸	57-11-4	3	-	36839000	29949000	35097000	58134000	54868000	74991000	63814000	60720000	69994000	34409000	31448000	41649000	23629000	51567000	33906000	56174000	50884000	42198000	87961000	70671000	55290000	34694000	40832000	28279000	15544000	14643000	13869000	C01530	ko00061,ko01040
mws1068	UPLC-MS/MS	285.04	151	-	-	286.048	C15H10O6	[M-H]-	Kaempferol (3,5,7,4'-Tetrahydroxyflavone)	山奈酚	Flavonoids	黄酮	Flavonols	黄酮醇	520-18-3	1	-	13252	56175	91993	651540	561490	198690	602250	823010	160060	14023000	18894000	5296700	26648	5976.3	6416	21820	15217	8007	12733	8307.8	6220.4	12770	31492	15223	2648700	3739300	3570900	C05903	ko00941,ko00944,ko01100,ko01110
pmn001511	UPLC-MS/MS	285.1	123	-	-	286.105	C13H18O7	[M-H]-	3-Hydroxy-5-Methylphenol-1-O-Glucoside	3-羟基-5-甲基苯酚-1-氧-葡萄糖苷	Phenolic acids	酚酸类	Phenolic acids	酚酸类	-	3	-	9	9	9	9	9	9	9	9	9	9	9	9	9	9	9	15223	16350	9	603430	358470	195370	206960	38261	9	68275	83571	74322	--	--
MWSslk035	UPLC-MS/MS	285.1	123.05	-	-	286.105	C13H18O7	[M-H]-	Orcinol glucoside	苔黑酚葡萄糖苷	Phenolic acids	酚酸类	Phenolic acids	酚酸类	21082-33-7	3	-	9	9	9	10615	9	9	9	9	9	9	9	9	9	9	9	9	19644	9	553260	314390	168060	177660	31344	18993	43713	70106	78068	--	--
mws0064	UPLC-MS/MS	287.06	135	-	-	288.063	C15H12O6	[M-H]-	Eriodictyol (5,7,3',4'-Tetrahydroxyflavanone)	圣草酚	Flavonoids	黄酮	Flavanones	二氢黄酮	552-58-9	3	-	9	9	9	6719.7	28633	5654.7	30739	10322	9	1070600	88711	24425	3544.4	9	9	68650	35799	68328	39981	18446	26249	79566	158290	109910	70071	74113	79079	C05631	ko00941,ko01100,ko01110
mws1094	UPLC-MS/MS	287.06	259	-	-	288.063	C15H12O6	[M-H]-	Aromadendrin (DihydroKaempferol)	香橙素 (二氢山奈酚)	Flavonoids	黄酮	Flavanonols	二氢黄酮醇	480-20-6	3	-	9	9	9	9	9	9	9	9	9	60145	44013	40245	9	9	9	9	9	9	9	9	9	78974	89612	34731	18765	21306	24705	C00974	ko00941,ko01100,ko01110
pmn001686	UPLC-MS/MS	287.22	241.22	-	-	288.23	C16H32O4	[M-H]-	10,16-Dihydroxypalmitic acid	10,16-二羟基棕榈酸	Lipids	脂质	Free fatty acids	游离脂肪酸	3233-90-7	1	-	9	9	9	9723.5	15256	12967	8141.2	16065	12544	184880	271940	330900	9	9	9	4198	10316	3175.7	13989	16756	3397.3	334360	483290	219770	63485	68953	71758	C08285	ko00073
pmb3081	UPLC-MS/MS	289	97	-	-	290.004	C6H11PO11	[M-H]-	Glucarate O-Phosphoric acid	磷酸葡萄糖酸	Others	其它类	Saccharides and Alcohols	糖及醇类	-	3	-	14680000	18043000	13722000	7868800	8905400	9083800	4713500	3825600	3410300	3822500	2941100	6268300	24578000	26074000	24772000	11919000	11822000	12027000	1026900	1392600	2449300	6539100	5539400	7997300	5104900	10367000	10882000	--	--
pme3163	UPLC-MS/MS	289	97	-	-	290.04	C7H15O10P	[M-H]-	D-Sedoheptuiose 7-phosphate	D-景天庚酮糖 7-磷酸	Others	其它类	Saccharides and Alcohols	糖及醇类	2646-35-7	3	-	9152900	11352000	8069500	9754700	9884800	6645300	6104200	5239600	4454300	7903300	4640900	7530400	16651000	16596000	15700000	8189000	6779700	7986000	1934200	1900000	2313600	8098800	7995100	7460900	6669200	7641500	8292700	--	--
mws0054	UPLC-MS/MS	289.07	245	-	-	290.079	C15H14O6	[M-H]-	Catechin	儿茶素	Flavonoids	黄酮	Flavanols	黄烷醇类	154-23-4	3	-	407750	1627100	275610	9	9	9	9	9	9	9	9	9	9	9	9	9	9	9	9	9	9	9	9	9	83782	114340	107490	C06562	ko00941,ko01110
pmb2657	UPLC-MS/MS	289.1	97.1	-	-	290.123	C10H18N4O6	[M-H]-	Argininosuccinic acid	精氨基琥珀酸	Organic acids	有机酸	Organic acids	有机酸	2387-71-5	3	-	123900	107690	169550	16310	24711	29596	227870	61861	149330	400800	205020	106210	77994	124050	80576	8227.1	13089	8494.2	60896	54312	156540	788360	506280	538190	120150	141350	129310	C03406	ko00220,ko00250,ko01100,ko01110,ko01230
pmb0885	UPLC-MS/MS	291	190.9	-	-	290.188	C18H26O3	[M+H]+	4-Oxo-9Z,11Z,13E,15E-Octadecatetraenoic Acid	4-氧化-9Z,11Z,13E,15E-十八碳四烯酸	Lipids	脂质	Free fatty acids	游离脂肪酸	-	3	-	9	9	9	137380	92897	220500	397690	371400	632200	158290	138860	262120	3442.4	9	9	82431	105370	136160	229520	267300	216610	215890	140700	158430	136400	170120	162570	--	--
Zmyn004732	UPLC-MS/MS	293.21	185.12	-	-	294.219	C18H30O3	[M-H]-	2R-hydroxy-9Z,12Z,15Z-octadecatrienoic acid	2R-羟基-9Z,12Z,15Z-十八碳三烯酸	Others	其它类	Others	其它	-	3	-	290170	289050	1045500	916300	790320	607880	486230	455930	408120	1475600	1127200	1749500	263730	286110	166290	577090	501140	378660	523960	560240	287340	2427200	2509000	1310500	627890	683190	672540	C16342	ko00592
Zmpn003368	UPLC-MS/MS	293.21	195.14	-	-	294.219	C18H30O3	[M-H]-	13S-Hydroxy-9Z,11E,15Z-octadecatrienoic acid	13S-羟基-9Z,11E,15Z-十八碳三烯酸	Lipids	脂质	Free fatty acids	游离脂肪酸	87984-82-5	3	-	8036.2	8172.3	26703	134350	214250	242800	151030	174660	235950	231340	257510	663710	8797.9	9254	5960.7	102700	94475	169240	172080	135840	113180	594730	173440	805150	121360	144830	146300	C16316	ko00592
pmb2792	UPLC-MS/MS	293.21	193.1	-	-	294.219	C18H30O3	[M-H]-	13-Hydroxy-6,9,11-octadecatrienoic acid	13-羟基-6,9,11-十八碳三烯酸	Lipids	脂质	Free fatty acids	游离脂肪酸	74784-20-6	3	-	28160	38060	28986	65404	71849	61811	51715	55090	52690	56532	63242	72660	73449	67421	71041	96226	92573	93726	70699	73718	75218	63027	65835	58466	45594	53238	51949	--	--
Zmyn004676	UPLC-MS/MS	293.21	113.1	-	-	294.219	C18H30O3	[M-H]-	17-Hydroxylinolenic acid	17-羟基亚麻酸	Lipids	脂质	Free fatty acids	游离脂肪酸	-	2	-	37722	80435	261620	244360	191330	241240	131670	106100	262040	348170	206310	917990	123410	42166	81614	77464	106800	139680	122820	75295	95443	1384000	259060	1711700	244830	265340	256630	C16346	ko00592
Lmmn006306	UPLC-MS/MS	293.21	293.21	-	-	294.219	C18H30O3	[M-H]-	Machilusolide D	润楠丁内酯 D	Others	其它类	Others	其它	-	2	-	550320	573310	2301100	1803400	1563700	1272200	997410	986440	862380	3151100	2424600	3598200	502300	576380	345150	1220000	1109900	813740	1168800	1323600	576090	4879000	5470900	2383900	1308300	1395500	1456400	--	--
Lmbn005443	UPLC-MS/MS	293.21	235.17	-	-	294.219	C18H30O3	[M-H]-	13-KODE; (9Z,11E)-13-Oxooctadeca-9,11-dienoic acid	13-氧代十八碳-9,11-二烯酸	Lipids	脂质	Free fatty acids	游离脂肪酸	54739-30-9	3	-	9	9	4992.1	26277	40015	38268	49950	60877	55105	36531	45076	86006	9	9	3763.1	20036	22803	26813	41397	45379	33002	59375	42030	80931	23495	30759	26322	C14765	ko00591
pmb2786	UPLC-MS/MS	293.21	235.17	-	-	294.219	C18H30O3	[M-H]-	9-Hydroxy-10,12,15-octadecatrienoic acid	9-羟基-10,12,15-十八碳三烯酸	Lipids	脂质	Free fatty acids	游离脂肪酸	89886-42-0	3	-	2164.4	2171.7	4650.6	29350	37546	39758	53773	64936	63359	33656	44123	80646	1370.6	1779.5	4113.3	19875	26567	25714	50562	42956	31437	63896	38220	83511	30338	26874	35538	C16326	ko00592
pmb2787	UPLC-MS/MS	293.21	275.1	-	-	294.219	C18H30O3	[M-H]-	9-Oxo-10E,12Z-octadecadienoic acid	9-过氧-10E,12Z-十八碳二烯酸	Lipids	脂质	Free fatty acids	游离脂肪酸	54232-59-6	3	-	9	9	9	52049	95709	109950	101590	144040	139960	88884	81018	236480	9	9	9	37451	38909	55632	70990	79329	58087	174180	93674	261170	71032	82972	77341	C14766	ko00591
Lmcn009539	UPLC-MS/MS	293.25	293.25	-	-	294.256	C19H34O2	[M-H]-	E,E,Z-1,3,12-Nonadecatriene-5,14-diol	E,E,Z-1,3,12-十九碳三烯-5,14-二醇	Lipids	脂质	Free fatty acids	游离脂肪酸	-	2	-	6962.1	7286.9	13032	6694.2	9160.2	9938.9	4260.4	3743.5	3048.2	17796	937.64	16183	2613.9	4105.4	2450.6	4439.3	7192	2815.9	7694.7	6360.8	6068.1	14290	11720	9456	9347.7	7867.1	5315.1	--	--
Lmqp000329	UPLC-MS/MS	296.07	104.11	-	-	295.056	C8H14N3O7P	[M+H]+	5-Aminoimidazole ribonucleotide	5-氨基咪唑核糖核苷酸	Nucleotides and derivatives	核苷酸及其衍生物	Nucleotides and derivatives	核苷酸及其衍生物	25635-88-5	1	-	238840	590170	510810	87173	186130	109650	110030	41535	54882	519110	443130	441200	139830	236410	197020	48510	38039	43499	42868	24118	46796	738650	1333900	651200	253840	316110	298520	--	--
Rfmb091	UPLC-MS/MS	295.23	195.14	-	-	296.235	C18H32O3	[M-H]-	9S-Hydroxy-10E,12Z-octadecadienoic acid	9S-羟基-10E,12Z-十八碳二烯酸	Lipids	脂质	Free fatty acids	游离脂肪酸	15514-85-9	2	-	156160	267770	663880	684520	597350	820830	369100	256240	559110	1111600	667460	2748700	434000	154990	263400	314760	355240	438990	310770	207800	251660	3248700	809740	3984400	636700	734210	763160	C14767	ko00591
pmb2799	UPLC-MS/MS	295.23	195.2	-	-	296.235	C18H32O3	[M-H]-	12,13-Epoxy-9-Octadecenoic Acid	12,13-环氧-9-十八碳烯酸	Lipids	脂质	Free fatty acids	游离脂肪酸	6799-85-5	1	-	9036.1	12011	25197	34116	31959	49783	15136	14762	34015	37595	50851	95537	9082.4	9412.1	22711	20720	28113	28282	17573	9156.5	14274	90682	53213	113530	26301	33512	31905	C14826	ko00591,ko01100
Lmbn005369	UPLC-MS/MS	295.23	195.14	-	-	296.235	C18H32O3	[M-H]-	13(S)-HODE;13(S)-Hydroxyoctadeca-9Z,11E-dienoic acid	13-羟基十八烷基-9,11-二烯酸	Lipids	脂质	Free fatty acids	游离脂肪酸	10219-69-9	2	-	150910	263090	622660	662540	575720	769050	362120	244780	530380	1037400	666800	2559400	408380	154150	247390	306050	341660	424480	311720	200270	227370	3316100	801910	3744500	651540	714200	717450	C14762	ko00591
Lmbn005662	UPLC-MS/MS	295.23	171.1	-	-	296.235	C18H32O3	[M-H]-	9(10)-EpOME;(9R,10S)-(12Z)-9,10-Epoxyoctadecenoic acid	9,10-环氧十八烯酸	Lipids	脂质	Free fatty acids	游离脂肪酸	16833-56-0	2	-	36131	32928	126410	392070	333160	666200	140590	129810	302690	571470	655650	1387900	25079	27726	50660	200390	232690	281900	118060	110260	84769	994510	614780	1253100	280730	316130	295770	C14825	ko00591,ko01100
pme1474	UPLC-MS/MS	298.1	136	-	-	297.09	C11H15N5O3S	[M+H]+	5'-Deoxy-5'-(methylthio)adenosine	5-脱氧-5-甲硫腺苷	Nucleotides and derivatives	核苷酸及其衍生物	Nucleotides and derivatives	核苷酸及其衍生物	2457-80-9	1	-	11372000	8793100	10756000	6639500	6175700	4871600	6356800	7862000	8931800	17330000	14258000	14326000	7001000	9010100	7905900	5575200	9643000	7335900	5915100	7612300	6449000	15836000	21457000	16612000	9113600	9602800	9224900	C00170	ko00270,ko00908,ko01100
pmb0197	UPLC-MS/MS	298.1	166.3	-	-	297.107	C11H15N5O5	[M+H]+	N7-Methylguanosine	N7-甲基鸟苷	Nucleotides and derivatives	核苷酸及其衍生物	Nucleotides and derivatives	核苷酸及其衍生物	20244-86-4	3	-	21210	22161	33408	321610	362200	197830	1030000	760670	496030	615480	953630	646160	24650	34631	17420	216720	166470	160160	594250	366880	236860	620060	450560	661360	329450	375220	289540	C20674	--
Lmbn009444	UPLC-MS/MS	297.24	183.14	-	-	298.251	C18H34O3	[M-H]-	Ricinoleic acid	蓖麻油酸	Lipids	脂质	Free fatty acids	游离脂肪酸	141-22-0	1	-	138540	109440	184150	53237	46343	36366	55240	60562	45236	129640	138080	127060	123880	190720	145670	24725	28265	36125	57156	56052	66009	187680	224000	175420	78232	84934	92980	C08365	--
pmf0297	UPLC-MS/MS	297.32	183.1	-	-	298.324	C20H42O	[M-H]-	1-Eicosanol	正二十醇	Lipids	脂质	Free fatty acids	游离脂肪酸	629-96-9	3	-	159480	123660	240840	68516	49914	44274	67917	65241	52600	139670	163360	148600	154050	216820	168010	31739	33702	45182	66347	65686	82046	199070	277760	210670	100470	103920	102870	--	--
mws0724	UPLC-MS/MS	298.08	208	-	-	299.087	C10H13N5O6	[M-H]-	8-Hydroxyguanosine	8-羟基鸟苷	Nucleotides and derivatives	核苷酸及其衍生物	Nucleotides and derivatives	核苷酸及其衍生物	3868-31-3	3	-	9	9	9	66143	57379	52774	188080	201320	127740	143320	207320	131010	9	9	9	9	9	9	42126	45375	34383	30940	9	32067	38017	52605	57483	--	--
Lmmn002230	UPLC-MS/MS	299.02	271.03	-	-	300.027	C15H8O7	[M-H]-	Demethylwedelolactone	去甲基蟛蜞菊内酯	Lignans and Coumarins	木脂素和香豆素	Coumarins	香豆素	6468-55-9	2	-	35399	122060	369630	1636400	6136000	1119200	3427900	5292300	1170900	51480000	36811000	17595000	60682	31506	5634	161880	84278	377350	549210	184900	178000	1394900	1126500	1179600	11487000	13274000	13245000	--	--
MWSHY0009	UPLC-MS/MS	301.07	286.05	-	-	300.063	C16H12O6	[M+H]+	Diosmetin (5,7,3'-Trihydroxy-4'-methoxyflavone)	香叶木素	Flavonoids	黄酮	Flavones	黄酮	520-34-3	3	-	9	9	3722.4	9	6259.3	9	9	13076	11216	313320	112040	90078	9	9	9	84434	52281	71860	236050	75605	171210	172650	90638	179760	46518	66290	61610	C10038	--
Lmjp004941	UPLC-MS/MS	301.07	286.05	-	-	300.063	C16H12O6	[M+H]+	Rhamnocitrin (7-MethylKaempferol)	鼠李柠檬素	Flavonoids	黄酮	Flavones	黄酮	569-92-6	3	-	2405.8	9	9	10867	7940.3	7779.9	18443	7630.9	15740	314340	124250	77972	9	3515.5	9	60184	73073	73411	210430	84071	148070	167940	90782	182870	47560	55254	71871	C17059	--
MWS20189	UPLC-MS/MS	301.07	286.05	-	-	300.063	C16H12O6	[M+H]+	Tectorigenin	鸢尾黄素	Flavonoids	黄酮	Isoflavones	异黄酮	548-77-6	3	-	3098.7	3599.3	3389.4	7919.5	6337.8	3399.7	15601	15241	10830	305120	129220	75218	2333.2	2359.8	5501	69196	72899	75922	215190	79624	166450	184220	88972	183550	51809	67566	66605	C10534	--
Zmhn001358	UPLC-MS/MS	299.08	137.02	-	-	300.084	C13H16O8	[M-H]-	4-O-Glucosyl-4-hydroxybenzoic acid	4-O-葡萄糖基-4-羟基苯甲酸	Phenolic acids	酚酸类	Phenolic acids	酚酸类	-	1	-	81418	124000	51730	262070	305210	188620	116520	187420	285600	629670	389530	330970	76794	47232	22882	214590	205980	152000	176240	120230	83757	368590	168420	318420	185010	245310	206520	--	--
Hmtn001302	UPLC-MS/MS	299.08	137.02	-	-	300.085	C13H16O8	[M-H]-	Glucosyloxybenzoic acid	葡萄糖氧基苯甲酸	Phenolic acids	酚酸类	Phenolic acids	酚酸类	-	1	-	34175000	26620000	44347000	39586000	33929000	23423000	19693000	23494000	26255000	65261000	41278000	55686000	22077000	9282800	11007000	16994000	6910200	8579800	9714300	4322300	9916800	29370000	21519000	25862000	21396000	24714000	22935000	--	--
Lmsn002247	UPLC-MS/MS	299.08	137.02	-	-	300.085	C13H16O8	[M-H]-	1-O-Salicyloyl-β-D-glucose	1-O-水杨酰-β-D-葡萄糖	Phenolic acids	酚酸类	Phenolic acids	酚酸类	60517-74-0	1	-	84558	144910	189220	443390	437270	244410	159960	168770	426610	757170	418630	379360	83058	52217	52839	330040	230150	207050	230060	225170	163670	472540	426520	382390	215870	271290	285380	--	--
mws2367	UPLC-MS/MS	299.11	119	-	-	300.121	C14H20O7	[M-H]-	Salidroside	红景天苷	Phenolic acids	酚酸类	Phenolic acids	酚酸类	10338-51-9	2	-	9	22229	10557	14844	9501.6	84344	32752	26751	199560	109500	37215	58375	9	9	9	78926	59128	19428	92983	53336	32641	74728	84100	58030	33804	58871	50207	C06046	ko00350,ko01100
Cmmn012461	UPLC-MS/MS	299.2	299.2	-	-	300.209	C20H28O2	[M-H]-	Dehydroabietic acid	脱氢枞酸	Terpenoids	萜类	Ditepenoids	二萜	1740-19-8	2	-	213820	137180	148770	185690	157070	146840	148520	148650	142800	147740	254430	100140	116110	90737	101720	164830	169040	178480	118350	99202	175280	1189900	54268	889040	158090	143390	136330	--	--
MWS4295	UPLC-MS/MS	299.26	253.25	-	-	300.266	C18H36O3	[M-H]-	DL-2-hydroxystearic acid	DL-2-羟基硬脂酸	Lipids	脂质	Free fatty acids	游离脂肪酸	629-22-1	2	-	6248.7	9344	12606	10244	17232	21277	1688.1	3178	3194.3	6314.2	9401.4	7548.9	12414	12908	7175.1	6987.4	10405	8494.6	3762.2	5645.6	4422.7	14118	11173	7912.3	8838.1	9410.1	9386.2	--	--
MWS5235	UPLC-MS/MS	299.26	253.25	-	-	300.266	C18H36O3	[M-H]-	12-Hydroxyoctadecanoic acid	12-羟基硬脂酸	Lipids	脂质	Free fatty acids	游离脂肪酸	106-14-9	2	-	873.29	2733.6	2939.7	4334.6	4845.4	4006	4362.6	8346.9	4825.2	38713	104970	28760	3902.6	2451	2029.4	7370.9	4570.7	5021.1	9033	7672.8	7369.1	31174	44136	27159	10888	13479	13474	--	--
Zmyn005384	UPLC-MS/MS	299.26	253.26	-	-	300.266	C18H36O3	[M-H]-	2R-Hydroxyoctadecanoic Acid	2R-羟基十八烷酸	Lipids	脂质	Free fatty acids	游离脂肪酸	26633-48-7	2	-	5913.3	8955.2	12131	11244	16441	22845	2330.2	3115.2	4063.3	5250.4	7455.3	8560.4	9127.2	12127	6369.4	7644.6	10889	8925.9	4798.4	5759.4	3850.9	15695	10703	6106.8	8767.1	10414	7929.4	C03042	--
Lmqn008288	UPLC-MS/MS	299.26	299.26	-	-	300.267	C18H36O3	[M-H]-	3-Hydroxyoctadecanoic Acid	3-羟基十八烷酸	Lipids	脂质	Free fatty acids	游离脂肪酸	45261-96-9	3	-	217330	142650	155190	187860	148390	154550	141780	129330	133870	267330	410560	204680	137070	85412	131510	150060	160810	146170	118710	144740	126390	1187000	503780	780330	169060	215310	186640	--	--
pme3514	UPLC-MS/MS	301.04	151	-	-	302.043	C15H10O7	[M-H]-	Morin	桑色素	Flavonoids	黄酮	Flavonols	黄酮醇	480-16-0	1	-	57474	261440	380270	2766100	2211400	1391000	4555400	6390100	2130100	48425000	60325000	32647000	131230	66411	29903	241430	190400	382480	1064700	379530	600180	3501400	4989000	4642000	8767800	11850000	11880000	C10105	--
Zmpp002571	UPLC-MS/MS	303.05	257.05	-	-	302.043	C15H10O7	[M+H]+	Robinetin	刺槐亭	Flavonoids	黄酮	Flavonols	黄酮醇	490-31-3	2	-	9	9	9	679280	619990	176780	128790	236630	153160	19238000	19797000	5110300	9	13653	9	42089	20841	27294	96420	59120	71111	68860	123370	112240	1934600	2644700	3186000	C10177	--
mws1326	UPLC-MS/MS	301.04	211.4	-	-	302.043	C15H10O7	[M-H]-	Herbacetin	草质素	Flavonoids	黄酮	Flavonols	黄酮醇	527-95-7	3	-	9	9	9	3494.6	7361	2755.1	6856.9	10465	6040.5	126030	167720	59894	9	9	9	9	9	9	9	9	9	9457.1	13395	8775.7	22665	29260	32210	C02806	--
Hmcn002875	UPLC-MS/MS	301.04	255.02	-	-	302.043	C15H10O7	[M-H]-	6-Hydroxyluteolin	6-羟基木犀草素	Flavonoids	黄酮	Flavones	黄酮	18003-33-3	2	-	9	9	10431	33303	39164	33670	32627	61192	23126	413980	532540	292860	9	9	9	9	9	9	8955.8	9	9	18382	30493	30140	73654	88826	87331	C10072	--
pme2954	UPLC-MS/MS	303.05	137.02	-	-	302.043	C15H10O7	[M+H]+	Quercetin	槲皮素	Flavonoids	黄酮	Flavonols	黄酮醇	117-39-5	1	-	63414	42602	70456	431820	357240	156380	317400	494110	105550	5172100	6797600	2164100	13973	7257	32151	143890	170580	264010	129680	43425	70043	137810	388600	292560	538050	656180	773830	C00389	ko00941,ko00944,ko01100,ko01110
mws0463	UPLC-MS/MS	301.07	164	-	-	302.079	C16H14O6	[M-H]-	Hesperetin	橙皮素	Flavonoids	黄酮	Flavanones	二氢黄酮	520-33-2	3	-	27960	76522	7037.1	17317	8555.5	9	29102	9390.2	9	532960	363380	97336	9	9	9	13861	10200	8700.4	16347	5649.8	6131.5	8201.3	12504	10264	65443	73748	80467	C01709	ko00941
Zmhn000892	UPLC-MS/MS	301.09	139.05	-	-	302.1	C13H18O8	[M-H]-	4-O-Glucosyl-3,4-dihydroxybenzyl alcohol	4-O-葡萄糖基-3,4-二羟基苄醇	Phenolic acids	酚酸类	Phenolic acids	酚酸类	-	2	-	9	9	9	33147	9	25291	367820	215900	176840	62992	26071	18014	9558	9	9	163670	175090	360430	802800	700340	1018600	154770	222600	387790	176670	220850	237080	--	--
Hmqn000843	UPLC-MS/MS	301.09	123.01	-	-	302.1	C13H18O8	[M-H]-	Tachioside	它乔糖苷	Phenolic acids	酚酸类	Phenolic acids	酚酸类	109194-60-7	2	-	2530000	2774600	1861200	1130300	1601300	653920	185650	341710	209230	107220	113000	48013	1362400	889830	1024200	2051000	1800500	1623200	372510	92306	424510	130020	121730	185120	586100	688060	788510	--	--
Hmsn002598	UPLC-MS/MS	301.09	139.04	-	-	302.1	C13H18O8	[M-H]-	Salirepin	柳匍匐次苷	Phenolic acids	酚酸类	Phenolic acids	酚酸类	26652-12-0	3	-	333960	266120	418770	404070	346050	212980	233330	293990	339190	766530	456600	593930	166050	95324	107890	150270	68287	86673	124320	73761	94660	300020	222270	272200	204700	243400	267280	--	--
Cmmn012997	UPLC-MS/MS	301.22	301.22	-	-	302.225	C20H30O2	[M-H]-	Abietic acid	松香酸	Terpenoids	萜类	Ditepenoids	二萜	514-10-3	2	-	9	9	9	9	9	9	43210	9	9	934680	9	9	9	9	9	9	9	9	9	9	9	9	9	9	39513	41080	42350	C06087	ko00904,ko01100,ko01110
mws0397	UPLC-MS/MS	301.22	257.23	-	-	302.225	C20H30O2	[M-H]-	Cis-5,8,11,14,17-Eicosapentaenoic Acid	二十碳五烯酸(顺-5,8,11,14,17)/EPA(C20:5)	Lipids	脂质	Free fatty acids	游离脂肪酸	10417-94-4	2	-	9	1913.1	9	1823.9	16813	9	9	9	9	9	9	35911	9	9	5728	9	9	3877.6	9	9	9	9	4907.7	9	3245	4344.8	2949.7	C06428	ko01040
pmp000022	UPLC-MS/MS	305.1	159.05	-	-	304.095	C16H16O6	[M+H]+	Oxypeucedanin hydrate	氧化前胡素水合物	Lignans and Coumarins	木脂素和香豆素	Coumarins	香豆素	2643-85-8	3	-	9	9	9	60460	42524	137580	93650	89052	220260	62623	132670	193650	9	9	9	93087	32162	119420	164210	85401	258340	157270	70650	118510	62110	71075	56087	--	--
mws0369	UPLC-MS/MS	303.23	258.9	-	-	304.24	C20H32O2	[M-H]-	Arachidonic Acid	花生四烯酸	Lipids	脂质	Free fatty acids	游离脂肪酸	506-32-1	2	-	12360	26700	48302	9	9	9	9	9	9	9	9	9	9615.5	9	9	9	9	9	9	9	9	9	9	9	2154.8	5209	4981	C00219	ko00590,ko00591,ko01040,ko01100
pmn001610	UPLC-MS/MS	307.26	307.3	-	-	308.272	C20H36O2	[M-H]-	Eicosadienoic acid	二十碳二烯酸	Lipids	脂质	Free fatty acids	游离脂肪酸	5598-38-9	3	-	193550	146130	524340	129620	216240	146720	18500	41835	22898	164900	457460	74280	261010	401020	216530	53776	89888	69180	26260	24283	10503	568420	622510	565850	152980	192190	210130	C16525	ko01040
pmb2857	UPLC-MS/MS	308.1	146.1	-	-	309.106	C11H19NO9	[M-H]-	L-Glutamic acid-O-glycoside	L-谷氨酸-O-葡萄糖苷	Amino acids and derivatives	氨基酸及其衍生物	Amino acids and derivatives	氨基酸及其衍生物	-	3	-	20667	26252	11351	14246	13847	16254	9	9	9	12974	13725	15249	27021	20534	41747	21306	15411	22507	3868.9	9	9	10802	13872	15020	10769	9619.7	12588	--	--
pmb2791	UPLC-MS/MS	309.21	209.1	-	-	310.1	C18H30O4	[M-H]-	9-Hydroperoxy-10E,12,15Z-octadecatrienoic acid	9-羟基过氧-10E,12,15Z-十八碳三烯酸	Lipids	脂质	Free fatty acids	游离脂肪酸	111004-08-1	3	-	6517.7	7450.6	9028.1	10859	21244	37712	26239	28418	87442	23481	22505	167540	12822	11229	8490.6	14997	8624.5	22378	22610	19501	17087	39864	20560	41034	16399	19247	18564	C16321	ko00592,ko01110
Zmyn004449	UPLC-MS/MS	309.21	171.1	-	-	310.214	C18H30O4	[M-H]-	9-Hydroxy-12-oxo-10(E),15(Z)-octadecadienoic acid	9-羟基-12-氧代-10(E),15(Z)-十八碳二烯酸	Lipids	脂质	Free fatty acids	游离脂肪酸	-	2	-	5576	5909.5	25772	45518	47279	34362	48470	45852	42155	131760	105050	92084	8589.1	5944.2	5085.5	21395	17926	14792	14603	20818	10932	76784	73880	40755	28251	33456	30307	C21923	ko00592,ko01110
Zmzn003953	UPLC-MS/MS	309.2	227.2	-	-	310.214	C18H30O4	[M-H]-	13(s)-hydroperoxy-(9z,11e,15z)-octadecatrienoic acid	13-氢过氧化-9z,11e,15z-十八碳三烯酸	Lipids	脂质	Free fatty acids	游离脂肪酸	67597-26-6	1	-	100220	86625	124370	113820	118420	99986	98470	88803	68799	120540	167730	98205	62910	39353	59514	130860	159130	126360	98393	153120	130340	290000	202980	234760	127660	134610	137010	C04785	ko00592,ko01100,ko01110
pmn001606	UPLC-MS/MS	309.28	309.28	-	-	310.287	C20H38O2	[M-H]-	Eicosenoic acid	二十碳烯酸	Lipids	脂质	Free fatty acids	游离脂肪酸	26764-41-0	3	-	106210	91704	143750	160130	109220	315990	122750	125520	92205	16046	16744	9229	66268	148170	70589	254970	242100	295980	141070	77792	56114	30626	28118	45051	2966.9	3319.9	4064.3	C16526	ko01040
Lmlp004754	UPLC-MS/MS	312.11	294.21	-	-	311.1	C14H17NO7	[M+H]+	Ehretioside B	2-(葡萄糖基氧基)-4-羟基苯乙腈	Alkaloids	生物碱	Alkaloids	生物碱	156368-84-2	3	-	28276	26468	87588	82095	87949	75420	84029	62612	101870	170460	109660	155610	22803	13121	14964	48831	44446	37697	43115	38470	23811	209990	215360	191710	57377	78209	77674	--	--
pme3967	UPLC-MS/MS	312.13	180	-	-	311.123	C12H17N5O5	[M+H]+	2-(Dimethylamino)guanosine	2-(二甲基氨基)鸟苷	Nucleotides and derivatives	核苷酸及其衍生物	Nucleotides and derivatives	核苷酸及其衍生物	2140-67-2	3	-	135840	161640	155830	611870	950560	598970	971970	860690	872120	921870	1865000	1459800	228260	265710	171520	1005600	616070	591040	1530000	658020	542240	2064700	1050800	1480100	686650	880230	856940	--	--
Jmbn003691	UPLC-MS/MS	311.11	59.01	-	-	312.121	C15H20O7	[M-H]-	3,4-dihydroxy-allylbenzene-3-O-β-D-glucopyranoside	3,4-二羟基烯丙基-3-O-β-D-葡萄吡喃糖苷	Others	其它类	Others	其它	-	2	-	75384	46428	78582	387710	278500	146890	542940	380510	540340	396420	244190	197070	48203	18141	29370	614990	352400	905450	1002000	1405200	1106300	769290	638110	850470	303890	493190	438610	--	--
Rfmb087	UPLC-MS/MS	311.22	293.21	-	-	312.23	C18H32O4	[M-H]-	9-Hydroxy-13-oxo-10-octadecenoic Acid	9-羟基-13-氧代-10-十八碳烯酸	Lipids	脂质	Free fatty acids	游离脂肪酸	-	3	-	23960	39496	206780	278860	462040	207890	17428	14623	27193	59494	115580	180070	55555	9381.9	50157	667710	394260	376590	42883	44957	27021	163300	220430	109190	83069	95481	87415	--	--
Lmbn005287	UPLC-MS/MS	311.22	249.22	-	-	312.23	C18H32O4	[M-H]-	7S,8S-DiHODE; (9Z,12Z)-(7S,8S)-Dihydroxyoctadeca-9,12-dienoic acid	7,8-二羟基-9,12-十八碳二烯酸	Lipids	脂质	Free fatty acids	游离脂肪酸	143288-65-7	2	-	87596	119020	188410	32310	80779	22772	11076	12410	31171	301660	423280	796710	164740	255000	229130	93762	36333	24965	27524	31044	15057	776920	878060	734780	193560	210710	207930	C07354	ko00591
pmb2804	UPLC-MS/MS	311.1	171.3	-	-	312.23	C18H32O4	[M-H]-	13S-Hydroperoxy-9Z,11E-octadecadienoic acid	13-氢过氧化-9,11-十八碳二烯酸	Lipids	脂质	Free fatty acids	游离脂肪酸	33964-75-9	3	-	628070	168600	1253000	1192200	1229700	1172500	488860	317770	518980	1507600	1086100	2901400	1278600	1459100	454420	925980	557530	347060	492910	446560	186590	3246300	1637800	1104500	719320	791820	805500	C04717	ko00591,ko01100
Lmbn004685	UPLC-MS/MS	311.22	223.17	-	-	312.23	C18H32O4	[M-H]-	5S,8R-DiHODE; (5S,8R,9Z,12Z)-5,8-Dihydroxyoctadeca-9,12-dienoate	5,8-二羟基-9,12-十八碳二烯酸	Lipids	脂质	Free fatty acids	游离脂肪酸	-	3	-	4113.5	3348	4637.8	12739	9670.8	8782.7	9594	8221.6	11087	5394.5	9174.3	12866	6111.2	10038	8613.5	9798.1	11302	10544	8902.9	10888	10542	9947.2	8837	9331.4	6183.5	4856.7	4308.5	C20186	ko00591
pmn001689	UPLC-MS/MS	311.22	223.17	-	-	312.23	C18H32O4	[M-H]-	9-Hydroxy-12-oxo-15(Z)-octadecenoic acid	9-羟基-12-氧代-15(Z)-十八碳烯酸	Lipids	脂质	Free fatty acids	游离脂肪酸	-	3	-	2090.1	3407	6661.6	19507	15658	30997	32651	19756	26510	23499	18559	33634	1973.2	1323.1	4733.9	23345	23890	42702	45457	70582	28649	83476	53116	98360	17914	20950	19584	C21924	ko00592,ko01110
MWS80006	UPLC-MS/MS	311.22	293.21	-	-	312.23	C18H32O4	[M-H]-	9-Hydroperoxy-9Z,11E-Octadecadienoic Acid	9-过氧化羟基-9Z,11E-十八碳二烯酸	Lipids	脂质	Free fatty acids	游离脂肪酸	-	2	-	6344.9	2216.5	4349.8	30988	24867	57368	31674	21683	35204	71441	86590	130580	2251.3	2292.7	6558.1	6599.4	16373	29248	20509	14934	13213	78892	33040	61444	26540	26467	27307	--	--
mws1174	UPLC-MS/MS	313.07	253	-	-	314.079	C17H14O6	[M-H]-	3-O-Acetylpinobanksin	3-O-乙酰短叶松黄烷酮	Flavonoids	黄酮	Flavanonols	二氢黄酮醇	52117-69-8	3	-	9	509.83	9	4744.7	5014	446630	30945	10915	12168	6978.4	24022	2653.7	329390	697410	255910	5836.1	1455	4167.5	15991	15693	50340	6860.5	8480.3	18099	46368	56191	53766	C16418	ko00941
Lmmn002179	UPLC-MS/MS	313.09	107.05	-	-	314.1	C14H18O8	[M-H]-	Methyl salicylate-2-O-glucoside	水杨酸甲酯-2-O-葡萄糖苷	Phenolic acids	酚酸类	Phenolic acids	酚酸类	10019-60-0	2	-	510700	1151600	640620	208440	290670	549140	502060	459580	527730	332130	382620	347970	777340	588730	576400	548850	435770	388360	400600	493640	429700	369600	393260	307970	396960	394310	443610	--	--
Lmyn002403	UPLC-MS/MS	313.09	101.02	-	-	314.1	C14H18O8	[M-H]-	Mandelic acid-β-glucoside	扁桃酸-β-葡萄糖苷	Phenolic acids	酚酸类	Phenolic acids	酚酸类	-	2	-	138370	336960	252160	76982	83164	195830	195650	137870	293580	140770	122050	203370	242160	132910	189820	136720	139330	118840	161420	145300	158180	144300	146970	132550	114070	137970	147060	--	--
Lmbn005487	UPLC-MS/MS	313.24	251.24	-	-	314.246	C18H34O4	[M-H]-	12,13-DHOME; (9Z)-12,13-Dihydroxyoctadec-9-enoic acid	12,13-二羟基十八烷基-9-烯酸	Lipids	脂质	Free fatty acids	游离脂肪酸	263399-35-5	1	-	21285	13214	28150	21283	58832	27648	18563	39606	29098	120090	266070	201310	36462	38455	63457	60795	50034	63085	81104	77090	51383	296800	520130	285450	93410	100300	103480	C14829	ko00591
Zmzp006646	UPLC-MS/MS	317.07	302.04	-	-	316.058	C16H12O7	[M+H]+	Capillarisin	茵陈色原酮	Others	其它类	Others	其它	56365-38-9	1	-	35336	193720	195220	1077600	844370	439960	524030	1508300	487030	18071000	20917000	20982000	180680	104260	82999	171640	81997	225430	872170	131150	486940	1269900	1538200	1512400	3124600	3584600	3629300	C08999	--
mws0066	UPLC-MS/MS	315.05	151	-	-	316.058	C16H12O7	[M-H]-	Isorhamnetin	异鼠李素	Flavonoids	黄酮	Flavonols	黄酮醇	480-19-3	1	-	22309	83829	129400	929420	832320	366400	409130	1214900	403020	11229000	15547000	20302000	214440	123170	90058	121140	67965	207210	404860	101630	304490	997880	1147200	1136300	2389500	2809700	2938800	C10084	--
mws2627	UPLC-MS/MS	317.07	285.04	-	-	316.058	C16H12O7	[M+H]+	Tamarixetin (3,3',5,7-Tetrahydroxy-4'-Methoxyflavone)	柽柳黄素	Flavonoids	黄酮	Flavonols	黄酮醇	603-61-2	2	-	7846.1	45365	50024	263140	266840	101470	129750	422240	119220	4275200	5707300	6107400	47843	33682	22169	24938	9068.3	57368	112490	32748	91427	345720	399070	398270	800760	1018600	977390	C10188	--
pmb2871	UPLC-MS/MS	315.07	153	-	-	316.079	C13H16O9	[M-H]-	1-O-Gentisoyl-β-D-glucoside	1-O-龙胆酰-β-D-葡萄糖	Phenolic acids	酚酸类	Phenolic acids	酚酸类	23445-11-6	1	-	6278600	6568200	3023100	9339400	11110000	7384000	17342000	9596600	9883000	18646000	14219000	12627000	8468500	6648900	8119600	13749000	8778300	10861000	18417000	15920000	12838000	17784000	10665000	13198000	9053000	10993000	10706000	--	--
pmn001367	UPLC-MS/MS	315.07	153.02	-	-	316.079	C13H16O9	[M-H]-	Protocatechuic acid-4-O-glucoside	原儿茶酸-4-O-葡萄糖苷	Phenolic acids	酚酸类	Phenolic acids	酚酸类	-	1	-	8727700	8632500	6330200	13337000	16177000	8864400	11719000	10361000	12456000	30123000	21072000	19944000	13108000	9604100	11813000	22408000	10030000	10717000	22492000	14790000	17077000	27072000	14168000	16211000	11099000	14765000	14139000	--	--
Lmfp001509	UPLC-MS/MS	317.09	153.02	-	-	316.079	C13H16O9	[M+H]+	1-O-Galloyl-rhamnose	1-O-没食子酰-鼠李糖	Tannins	鞣质	Tannin	鞣质	-	1	-	188860	275720	295360	32538	9	39713	9	9	9	65917	53731	100850	277500	158960	405040	9	27174	34098	9	9	9	81745	77082	78991	74353	68239	59379	--	--
pmn001553	UPLC-MS/MS	315.11	153.1	-	-	316.116	C14H20O8	[M-H]-	Cimidahurinine	北升麻宁	Phenolic acids	酚酸类	Phenolic acids	酚酸类	142542-89-0	3	-	56349	95425	26052	294910	435930	233690	1259400	1317500	925930	522960	915850	275620	442000	316480	55034	662030	811870	950960	922770	793150	598670	867240	684720	550120	464800	553630	569770	--	--
Zmtn001661	UPLC-MS/MS	315.11	153.02	-	-	316.116	C14H20O8	[M-H]-	Vanilloloside	香草醇苷	Phenolic acids	酚酸类	Phenolic acids	酚酸类	74950-96-2	3	-	5775200	5023900	2821500	8614100	8674300	5059200	9541200	8414500	8295300	18537000	13388000	11268000	8431700	6169400	7790800	11073000	8723000	8304600	14147000	13531000	11616000	12376000	9174100	10671000	6702500	8800100	7755100	--	--
Hmtn001120	UPLC-MS/MS	315.11	153.06	-	-	316.116	C14H20O8	[M-H]-	5-(2-Hydroxyethyl)-2-O-glucosylphenol	5-(2-羟乙基)-2-O-葡萄糖基苯酚	Phenolic acids	酚酸类	Phenolic acids	酚酸类	-	3	-	18858	89193	6029.2	225200	367360	174400	1229700	1019600	707570	431030	748270	235530	389670	246960	52696	579500	651810	746850	847080	617780	504190	569820	593980	372600	427220	472400	472300	--	--
pmb2221	UPLC-MS/MS	318.3	60.1	-	-	317.293	C18H39NO3	[M+H]+	4-Hydroxysphinganine	4-羟基鞘氨醇	Lipids	脂质	Sphingolipids	鞘脂	554-62-1	3	-	130500	94462	129450	248520	339340	480330	101440	120890	33973	278190	304610	176020	27259	6605.8	24177	232540	298990	236120	31331	51768	28687	25789	28408	25216	147210	179250	180420	C12144	ko00600,ko01100
Lmyp010328	UPLC-MS/MS	319.23	259.2	-	-	318.219	C20H30O3	[M+H]+	2-Oxokovalenic acid	2-Oxokovalenic acid	Terpenoids	萜类	Ditepenoids	二萜	-	2	-	9	9	9	21380	52907	25957	28880	52063	52085	187580	224820	141850	9	9	9	9	9	9	9	9	9	9	9	9	31352	27748	37049	--	--
Lmsp013116	UPLC-MS/MS	321.24	123.08	-	-	320.235	C20H32O3	[M+H]+	Ent-16α,17-Dihydroxykauran-2-one	对映-16α,17-二羟基-贝壳杉-2-酮	Terpenoids	萜类	Ditepenoids	二萜	-	3	-	7949.7	24692	11977	8011.7	13319	5229.6	22920	13346	23559	24543	7956.9	22666	18497	21070	27248	12814	5738.7	11809	41348	20093	29239	135810	98895	72962	18865	25862	29105	--	--
mws0582	UPLC-MS/MS	322.11	130	-	-	321.099	C11H19N3O6S	[M+H]+	S-(Methyl)glutathione	S-甲基谷胱甘肽	Amino acids and derivatives	氨基酸及其衍生物	Amino acids and derivatives	氨基酸及其衍生物	2922-56-7	3	-	440850	285470	296040	230730	93389	369960	11877	13548	18956	39229	29634	143650	637130	382370	219680	127310	127460	139530	4290.9	5183.3	11309	48300	42149	30499	98705	93514	75876	C11347	--
pme3174	UPLC-MS/MS	324.06	112	-	-	323.052	C9H14N3O8P	[M+H]+	Cytidine 5'-monophosphate(Cytidylic acid)	胞苷-5'-单磷酸	Nucleotides and derivatives	核苷酸及其衍生物	Nucleotides and derivatives	核苷酸及其衍生物	63-37-6	3	-	93745	87424	47691	228080	343110	307710	63642	66397	81512	111810	83025	185990	32666	50684	38597	250110	186820	237040	102740	61036	38107	155520	127970	151160	144270	133190	129500	C00055	ko00240,ko01100
pme2074	UPLC-MS/MS	322.4	129.7	-	-	323.21	C18H29NO4	[M-H]-	(-)-Jasmonoyl-L-Isoleucine	(-)-茉莉酰-L-异亮氨酸	Organic acids	有机酸	Organic acids	有机酸	120330-93-0	3	-	190200	63479	355480	476450	109560	375540	1066600	153990	671880	1262200	417940	712110	49199	92869	39075	50907	87718	27269	111450	352420	104640	91749	235870	42885	254660	276220	281470	C18699	ko04075
pme3188	UPLC-MS/MS	323.03	211	-	-	324.036	C9H13N2O9P	[M-H]-	Uridine 5'-monophosphate	尿苷 5'-单磷酸	Nucleotides and derivatives	核苷酸及其衍生物	Nucleotides and derivatives	核苷酸及其衍生物	58-97-9	1	-	343360	532590	621890	1292000	2024600	1343500	649120	864150	868930	1790700	1716800	1995500	278640	422850	235170	711550	1037600	876470	756280	870030	627150	2025200	2481900	2343100	708600	930430	1025400	C00105	ko00240,ko01100,ko01240
Lmbp003825	UPLC-MS/MS	325.09	163.04	-	-	324.085	C15H16O8	[M+H]+	Skimmin (7-Hydroxycoumarin-7-O-glucoside)	茵芋苷	Lignans and Coumarins	木脂素和香豆素	Coumarins	香豆素	93-39-0	1	-	8564.7	12368	5804.8	301730	1608400	504890	349550	541260	399930	342340	327740	28084	5093.6	14796	695.91	173240	133540	234920	451630	76976	591910	66212	14678	97434	411430	349250	452970	--	--
MWSslk081	UPLC-MS/MS	325.14	149.03	-	-	324.136	C20H20O4	[M+H]+	Bavachin	补骨脂二氢黄酮	Flavonoids	黄酮	Flavanones	二氢黄酮	19879-32-4	3	-	4094.7	9	9	219470	589950	299910	1539800	1981400	1107200	270520	420990	208390	9	9	9	203760	206440	707800	1370000	1293500	2791700	236320	218010	396340	302900	519980	437390	--	--
Hmpp003624	UPLC-MS/MS	325.14	107.04	-	-	324.136	C20H20O4	[M+H]+	1-(4-Hydroxyphenyl)-7-(3-methoxy-4-hydroxyphenyl)-4,6-heptadiene-3-one	1-(4-羟基苯基)-7-(3-甲氧基-4-羟基苯基)-4,6-庚二烯-3-酮	Phenolic acids	酚酸类	Phenolic acids	酚酸类	-	3	-	2088.9	9	3578.4	98459	168180	88109	552570	645020	257130	189240	194270	185890	7700.7	7633.7	9	283320	371180	422310	1086900	2100100	745430	259240	352380	325910	310610	325290	391220	--	--
mws0983	UPLC-MS/MS	326.31	62.06	-	-	325.298	C20H39NO2	[M+H]+	N-Oleoylethanolamine	油酰单乙醇胺	Alkaloids	生物碱	Alkaloids	生物碱	111-58-0	3	-	9	9	9	9	9	9	9	9	9	9	9	14917	9	9	9	3601	9	3578.1	9	9	19558	113980	111160	217250	29754	31176	36732	C20792	--
Hmhn003067	UPLC-MS/MS	325.09	119.05	-	-	326.1	C15H18O8	[M-H]-	Phenylpropionic acid-O-β-D-glucopyranoside	苯基丙酸-O-β-D-吡喃葡萄糖苷	Phenolic acids	酚酸类	Phenolic acids	酚酸类	-	1	-	430130	327790	184010	7670500	7338400	7048100	3949400	4436100	4939700	28043000	29231000	27620000	1846600	1086600	1395300	14744000	15703000	13200000	8543800	11766000	4359200	34331000	34737000	23186000	10934000	12968000	13288000	--	--
Zmhn002301	UPLC-MS/MS	325.09	163.04	-	-	326.1	C15H18O8	[M-H]-	p-Coumaric acid-4-O-glucoside	对香豆酸-4-O-葡萄糖苷	Phenolic acids	酚酸类	Phenolic acids	酚酸类	117405-48-8	2	-	385680	314970	180860	6284100	5892300	5606300	2745600	3201700	4140000	22272000	25173000	23061000	1433100	865850	1138300	14278000	13362000	9889400	6311000	8553200	3385000	29495000	28457000	20904000	8464300	10460000	10440000	C06739	--
Lmqn009304	UPLC-MS/MS	325.11	293.08	-	-	326.115	C19H18O5	[M-H]-	Eucalyptin (5-Hydroxy-7,4'-dimethoxy-6,8-dimethylflavone)	桉树素	Flavonoids	黄酮	Flavones	黄酮	3122-88-1	3	-	9	9	9	54369	41323	39801	27041	49379	21507	18743	23615	24674	9	9	9	40808	42004	23381	64202	55165	32716	41211	24046	23351	21390	24644	27753	--	--
Lmsn000363	UPLC-MS/MS	325.13	145.07	-	-	326.137	C16H22O7	[M-H]-	Raspberryketone glucoside	覆盆子苷	Phenolic acids	酚酸类	Phenolic acids	酚酸类	38963-94-9	3	-	1113300	477410	729050	1140400	765670	2215700	620500	203390	654680	4011200	2790900	11995000	935420	503780	638690	675120	759980	983530	210880	78516	106180	4372400	3940100	4123200	1409900	1862000	2003400	--	--
Jmzp008213	UPLC-MS/MS	327.16	151.07	-	-	326.152	C20H22O4	[M+H]+	Dehydrodiisoeugenol	去氢二异丁香酚	Lignans and Coumarins	木脂素和香豆素	Lignans	木脂素	2680-81-1	3	-	9	9	9	9	9	9	9	9	9	54228	36099	651570	9	9	9	9	9	9	9	9	9	9	9	9	18936	22691	17165	C10650	--
Zmgp004718	UPLC-MS/MS	327.16	137.06	-	-	326.152	C20H22O4	[M+H]+	1-(4-hydroxy-3-methoxyphenyl)-7-phenyl-3,5-diheptanone	1-(4-羟基-3-甲氧基苯基)-7-苯基-3,5-二庚酮	Others	其它类	Others	其它	-	3	-	27579	9928.1	36465	9	9	9	9	9	9	24276	47836	509540	135630	194060	40784	9	9	9	9	9	9	15625	9	9	49519	39877	60614	--	--
Smjp002269	UPLC-MS/MS	328.12	119.05	-	-	327.11	C18H17NO5	[M+H]+	N-[3-(4-Hydroxyphenyl)acryloyl]-L-tyrosine	N-[3-(4-羟基苯基)丙烯酰基]-L-酪氨酸	Amino acids and derivatives	氨基酸及其衍生物	Amino acids and derivatives	氨基酸及其衍生物	77201-66-2	3	-	12652	9	9	9	9	9	9	9	9	9	9	9	20735	9	27091	43902	54650	40206	173780	108540	156950	36493	39696	48229	25920	34976	34330	--	--
pmn001690	UPLC-MS/MS	327.14	165.09	-	-	328.152	C16H24O7	[M-H]-	3-Hydroxy-4-isopropylbenzylalcohol-3-O-glucoside	3-羟基-4-异丙基苯甲醇-3-O-葡萄糖苷	Phenolic acids	酚酸类	Phenolic acids	酚酸类	-	2	-	167920	283120	352660	165970	334310	197320	252220	575760	563520	162300	157450	211030	5532.4	3675.9	16791	6247	4151.9	10350	26036	14440	37515	13543	4559.5	11399	117770	139510	126430	--	--
pmn001691	UPLC-MS/MS	327.22	291.2	-	-	328.225	C18H32O5	[M-H]-	9,12,13-Trihydroxy-10,15-octadecadienoic acid	9,12,13-三羟基-10,15-十八碳二烯酸	Lipids	脂质	Free fatty acids	游离脂肪酸	-	1	-	8532.1	28900	73958	1454400	1471900	1161800	290700	355730	271270	828810	861230	1622600	34636	53905	17624	1158900	1786700	686120	415030	688700	129740	1456500	2366200	1350500	552990	667080	741100	--	--
mws0884	UPLC-MS/MS	328.05	134.2	-	-	329.053	C10H12N5O6P	[M-H]-	Cyclic 3',5'-Adenylic acid	环-3',5'-腺嘌呤核苷酸	Nucleotides and derivatives	核苷酸及其衍生物	Nucleotides and derivatives	核苷酸及其衍生物	60-92-4	1	-	276710	274340	425560	377800	383540	387870	181290	252160	59828	386550	917810	915660	373600	442760	209880	286810	390950	323020	633990	498290	405920	957500	816120	853450	353160	460910	461230	C00575	ko00230,ko01100
MWSHY0095	UPLC-MS/MS	331.08	271.06	-	-	330.074	C17H14O7	[M+H]+	Tricin (5,7,4'-Trihydroxy-3',5'-dimethoxyflavone)	苜蓿素(麦黄酮)	Flavonoids	黄酮	Flavones	黄酮	520-32-1	2	-	9	9	9	9	9	9	9	9	9	316650	545190	76125	9	9	9	9	9	9	9	9	9	9	9	9	68642	54448	61063	C10193	--
Lmtn002565	UPLC-MS/MS	329.11	167.03	-	-	330.095	C14H18O9	[M-H]-	1-O-Vanilloyl-D-Glucose	1-O-香草酰-D-葡萄糖	Phenolic acids	酚酸类	Phenolic acids	酚酸类	-	3	-	164220	338680	356550	288770	520300	80106	219150	862720	67720	137550	87649	79228	20164	13514	8958	37460	7830.5	15679	13152	8111	6710.5	24070	17364	39232	87645	118130	156230	C20470	--
Zmhn001883	UPLC-MS/MS	329.09	209.04	-	-	330.095	C14H18O9	[M-H]-	Vanillic acid-4-O-glucoside	香草酸-4-O-葡萄糖苷	Phenolic acids	酚酸类	Phenolic acids	酚酸类	32142-31-7	3	-	412280	1030100	290630	54995	319520	9	9	17354	9	9	17472	9	9	9	22091	8749	22620	18512	9	9	10954	9	4342.9	13559	50327	53316	54065	--	--
Lmmn003663	UPLC-MS/MS	329.09	167.04	-	-	330.095	C14H18O9	[M-H]-	5-Glucosyloxy-2-Hydroxybenzoic acid methyl ester	5-葡萄糖氧基-2-羟基苯甲酸甲酯	Phenolic acids	酚酸类	Phenolic acids	酚酸类	-	3	-	151550	341870	452750	267700	578950	68655	223390	972330	57124	111450	89076	74276	9	20691	9	9	15124	9	9	9	9	9	9	9	129670	180640	132690	--	--
pmn001517	UPLC-MS/MS	329.12	167	-	-	330.131	C15H22O8	[M-H]-	3,4,5-Trimethoxyphenyl-1-O-Glucoside	3,4,5-三甲氧基苯基-1-O-葡萄糖苷	Phenolic acids	酚酸类	Phenolic acids	酚酸类	-	3	-	37486000	58427000	39575000	11252000	14310000	20217000	9774300	15549000	20724000	113640000	106380000	94393000	59881000	41940000	36307000	10704000	9930100	9216000	15432000	13620000	10965000	75935000	98422000	80525000	50650000	59312000	64612000	--	--
Hmqn003054	UPLC-MS/MS	329.23	311.23	-	-	330.24	C18H34O5	[M-H]-	9,10,11-Trihydroxy-12-octadecenoic acid	9,10,11-三羟基-12-十八碳烯酸	Lipids	脂质	Free fatty acids	游离脂肪酸	61911-67-9	1	-	42458	91747	288080	777330	520010	626540	108540	103640	113020	513810	328080	837440	145830	133420	92910	704200	790610	430930	113510	140570	34612	779110	1042900	567570	286050	325770	323010	--	--
Lmbn003970	UPLC-MS/MS	329.23	211.14	-	-	330.241	C18H34O5	[M-H]-	9,12,13-TriHOME; 9(S),12(S),13(S)-Trihydroxy-10(E)-octadecenoic acid	9(S),12(S),13(S)-三羟基-10(E)-十八烯酸	Lipids	脂质	Free fatty acids	游离脂肪酸	97134-11-7	1	-	2497.2	8658.6	16047	23399	14233	29412	10400	4494.4	9167.2	38206	13310	95412	5638.8	3225.3	6069.5	11821	13899	38108	20810	12435	10885	247160	27952	292490	27203	32238	29091	C14833	ko00591
pmn001694	UPLC-MS/MS	329.23	229.15	-	-	330.241	C18H34O5	[M-H]-	9,10,13-Trihydroxy-11-Octadecenoic Acid	9,10,13-三羟基-11-十八碳烯酸	Lipids	脂质	Free fatty acids	游离脂肪酸	29907-57-1	1	-	676330	1726200	5111000	13633000	9063900	10712000	1752200	1610500	1782600	8219700	5704800	14615000	2351300	2115000	1304600	12359000	13884000	7437600	1737400	2498800	582150	12427000	17199000	9640500	4710600	5417900	5423400	C14835	ko00591
pmp001284	UPLC-MS/MS	331.28	313.27	-	-	330.277	C19H38O4	[M+H]+	Monopalmitin	单棕榈酸甘油酯	Lipids	脂质	Glycerol ester	甘油酯	542-44-9	1	-	126910	154480	173770	159650	158130	133820	100640	102440	80321	77213	104480	90053	100720	97650	115630	158910	203820	167100	97266	122770	106790	77420	92222	94397	112750	122550	132890	--	--
pme3184	UPLC-MS/MS	332.08	136	-	-	331.068	C10H14N5O6P	[M+H]+	2'-Deoxyadenosine-5'-monophosphate	2'-脱氧腺苷-5'-单磷酸	Nucleotides and derivatives	核苷酸及其衍生物	Nucleotides and derivatives	核苷酸及其衍生物	653-63-4	2	-	115770	70658	163560	42778	58292	60377	142450	186320	128910	85986	34310	47648	64489	75421	32792	238150	248830	158630	718180	727530	492070	466900	194320	275980	136890	146420	144320	C00360	ko00230,ko01100
pmb0789	UPLC-MS/MS	332.13	152.07	-	-	331.127	C14H21NO8	[M+H]+	Pyridoxine-5'-O-glucoside	吡哆醇-5'-O-葡萄糖苷	Others	其它类	Vitamin	维生素	-	3	-	355930	161180	386620	119010	210900	163690	389750	610690	370720	229780	122550	213370	178460	176810	59744	799440	807500	426640	2038300	2343100	1679500	1562100	611180	743310	398890	397240	446150	C03996	--
pmc0066	UPLC-MS/MS	333.05	137.05	-	-	332.052	C10H13N4O7P	[M+H]+	2'-Deoxyinosine-5'-monophosphate	2'-脱氧肌苷-5'-单磷酸	Nucleotides and derivatives	核苷酸及其衍生物	Nucleotides and derivatives	核苷酸及其衍生物	3393-18-8	3	-	746020	1082400	61655	8226800	9720900	7806800	170840	97348	593270	814670	587410	803630	107960	285800	524730	17919000	15318000	15498000	238550	209810	115310	567870	727450	424220	882580	871710	796140	C06196	ko00230
Zmhn001703	UPLC-MS/MS	331.07	169.02	-	-	332.074	C13H16O10	[M-H]-	5-O-Galloyl-D-hamamelose	5-O-没食子酰-D-金缕梅糖	Phenolic acids	酚酸类	Phenolic acids	酚酸类	-	1	-	9	45225	9	27651	447330	59649	9	287360	9	9	9	9	2006600	1265800	877310	3123700	3189800	4375000	2167300	1487800	2023300	3319200	2102100	3307200	728650	815960	995820	--	--
Lmfn000604	UPLC-MS/MS	331.07	169.01	-	-	332.074	C13H16O10	[M-H]-	6-O-Galloyl-D-glucose	6-O-没食子酰-D-葡萄糖	Phenolic acids	酚酸类	Phenolic acids	酚酸类	13186-19-1	1	-	9	9	9	42029	518920	59674	9	427560	9	9	9	9	1864700	1213400	891700	3355000	3326700	4271900	3144300	1444800	2402900	2909700	2040300	3406400	1016300	907430	880470	--	--
Hmln000659	UPLC-MS/MS	331.07	169.01	-	-	332.075	C13H16O10	[M-H]-	3-O-Galloyl-D-glucose	3-O-没食子酰-D-葡萄糖	Phenolic acids	酚酸类	Phenolic acids	酚酸类	-	1	-	9	36943	9	50324	9	31618	9	9	9	9	9	9	2049800	1288900	901070	3415300	3317900	5232700	2342300	1412500	3222900	2699500	2036400	3223800	698390	1033900	917710	--	--
Lmmn001294	UPLC-MS/MS	331.1	153.02	-	-	332.111	C14H20O9	[M-H]-	Koaburaside	3,5-二甲氧基-4-羟基苯酚-1-O-葡萄糖苷	Phenolic acids	酚酸类	Phenolic acids	酚酸类	41653-73-0	3	-	374830	540360	342940	2478600	2488400	1032400	167690	236640	109980	300440	507710	319710	255830	205880	215570	1761200	1877300	2069600	245470	112440	319310	222390	287430	398950	442470	578390	546930	--	--
Jmwn002117	UPLC-MS/MS	331.1	153.02	-	-	332.111	C14H20O9	[M-H]-	2-(3,4-dihydroxyphenyl)ethanediol 1-O-β-D-glucopyranoside	2-(3,4-二羟苯基)乙二醇-1-O-β-D-吡喃葡萄糖苷	Phenolic acids	酚酸类	Phenolic acids	酚酸类	-	3	-	425050	636750	448300	2025100	2835000	1153000	251380	177200	63510	368500	548670	311980	249320	196640	218940	2306800	1587100	1660100	312770	173290	361770	228280	267080	356700	552850	611240	607160	--	--
Cmcp007926	UPLC-MS/MS	333.21	287.2	-	-	332.199	C20H28O4	[M+H]+	Pinusolidic acid	松内酯酸	Terpenoids	萜类	Ditepenoids	二萜	40433-82-7	3	-	9	9	9	9	9	9	9	9	9	14179	9	9	69307	85084	61288	9	9	9	9	9	9	9	9	9	23024	19794	21571	--	--
mws0675	UPLC-MS/MS	335.06	123	-	-	334.057	C11H15N2O8P	[M+H]+	β-Nicotinamide mononucleotide	β-烟酰胺单核苷酸	Nucleotides and derivatives	核苷酸及其衍生物	Nucleotides and derivatives	核苷酸及其衍生物	1094-61-7	3	-	820720	979020	260520	350790	516180	237380	34461	121310	52634	166610	207990	74837	384590	1111200	334030	123540	297580	470330	66318	197200	48476	128390	197610	237600	308830	240440	254130	C00455	ko00760,ko01100
Lmqn000432	UPLC-MS/MS	333.06	333.06	-	-	334.067	C9H19O11P	[M-H]-	1-(sn-Glycero-3-phospho)-1D-myo-inositol	1-(sn-甘油-3-磷酸)-1D-肌醇	Others	其它类	Saccharides and Alcohols	糖及醇类	-	1	-	126670	76654	91861	53821	62462	30984	93926	25659	52208	435580	142910	139540	59763	51022	23551	23784	21813	30616	45812	22684	18052	246850	573870	81269	95621	157860	190290	--	--
pmf0289	UPLC-MS/MS	336.17	148	-	-	335.159	C15H21N5O4	[M+H]+	Riboprine	利波腺苷	Phenolic acids	酚酸类	Phenolic acids	酚酸类	7724-76-7	3	-	27455	19626	25794	57820	54142	77442	126810	77352	98445	175550	113890	106080	17444	18196	11262	39603	27870	43100	78148	30892	24100	139280	51183	128990	63088	47378	42852	C16427	ko00908,ko01110
MWSmce232	UPLC-MS/MS	337.06	163.04	-	-	336.063	C19H12O6	[M+H]+	Dicumarol	双香豆素	Lignans and Coumarins	木脂素和香豆素	Coumarins	香豆素	66-76-2	3	-	9	10030	9	30991	10363	32247	9	8112.7	8976.1	9	9	9	108340	322380	89106	14357	21048	53295	9	9	9	16760	9	21193	99001	134000	117940	C00796	--
pmn001421	UPLC-MS/MS	337.09	191.05	-	-	338.1	C16H18O8	[M-H]-	3-O-p-Coumaroylquinic acid	3-O-对香豆酰奎宁酸	Phenolic acids	酚酸类	Phenolic acids	酚酸类	87099-71-6	2	-	12167	10769	5097.8	392380	438750	2170700	1720200	2335100	9791800	2939500	2219200	4966600	7397.5	566.25	2826	58884	48508	150530	311430	153700	462660	528320	2474800	1458900	1318600	1642200	1211300	--	--
pmb3068	UPLC-MS/MS	337.09	173.1	-	-	338.1	C16H18O8	[M-H]-	1-O-p-Coumaroylquinic acid	1-O-对香豆酰奎宁酸	Phenolic acids	酚酸类	Phenolic acids	酚酸类	-	1	-	9	9	9	44456	44933	365240	114720	62311	667600	263650	9	183140	9	9	9	9	21974	33486	9	44345	34369	20816	77381	171260	95114	82218	79731	--	--
MWSmce310	UPLC-MS/MS	339.15	203.03	-	-	338.152	C21H22O4	[M+H]+	Bergamottin	佛手柑素	Lignans and Coumarins	木脂素和香豆素	Coumarins	香豆素	7380-40-7	3	-	213960	96233	118770	8428.5	20825	10782	18046	39472	14371	65380	145510	47204	369880	474180	547800	8241.2	6028.2	16104	6105.7	5532.6	10550	41928	34265	29431	91526	109520	104910	C22152	--
Lmbn001162	UPLC-MS/MS	339.07	177.02	-	-	340.079	C15H16O9	[M-H]-	Esculetin-7-O-glucoside	秦皮乙素-7-O-葡萄糖苷	Lignans and Coumarins	木脂素和香豆素	Coumarins	香豆素	-	1	-	935220	2832300	3887800	1468400	3718600	1829200	11972000	7931100	10308000	4666800	3676800	2197200	1439200	1362200	330700	5742000	3190100	5681100	5933500	6671400	5774900	2333500	7108100	3528300	3438100	4747000	4200100	--	--
Cmyn001328	UPLC-MS/MS	339.07	177.02	-	-	340.079	C15H16O9	[M-H]-	Daphnin	瑞香苷	Lignans and Coumarins	木脂素和香豆素	Coumarins	香豆素	486-55-5	1	-	1161400	2741900	4245200	1435700	2731200	2117700	11661000	8048900	11429000	3435200	3975400	1690200	1570900	1201100	415590	5357300	3563600	5919200	5874500	7534200	6219000	2530200	7420500	2820700	3778900	4358300	4521500	C01421	--
mws1015	UPLC-MS/MS	339.07	177	-	-	340.079	C15H16O9	[M-H]-	Esculin (6,7-DihydroxyCoumarin-6-glucoside)	秦皮甲素	Lignans and Coumarins	木脂素和香豆素	Coumarins	香豆素	531-75-9	1	-	985570	3062100	4078700	1254300	3549400	2223200	10919000	8685700	10606000	4387800	4028300	2450200	1645500	1253500	411740	5270000	4071800	5482100	6476400	7124000	6425400	2352800	8114300	2855500	3690200	4917500	5326800	C09264	--
Hmcn004128	UPLC-MS/MS	339.11	159.04	-	-	340.116	C16H20O8	[M-H]-	P-Methoyxcinnamate glucoside	对甲氧基桂皮酸葡萄糖苷	Lignans and Coumarins	木脂素和香豆素	Coumarins	香豆素	-	3	-	1715800	1843100	2398300	388030	437530	499330	133350	145340	169460	327720	424190	468800	982140	871700	741920	530580	351170	250750	134980	87693	209160	321950	139160	226260	360620	398440	417970	--	--
Xmgp006913	UPLC-MS/MS	341.14	137.06	-	-	340.131	C20H20O5	[M+H]+	2,4,2',4'-tetrahydroxy-3'-prenylchalcone	2,4,2',4'-四羟基-3'-异戊烯基查尔酮	Flavonoids	黄酮	Chalcones	查耳酮	-	3	-	1574900	1154400	1776400	5367200	5409200	1987900	296270	2238800	706700	2445100	4084300	1377600	298560	262100	210010	2466300	2556900	2686100	685360	338270	554330	832170	973560	648570	1527000	1181200	1323200	--	--
Lman002731	UPLC-MS/MS	341.09	135.04	-	-	342.095	C15H18O9	[M-H]-	Grevilloside F	银桦苷 F	Phenolic acids	酚酸类	Phenolic acids	酚酸类	1094004-50-8	2	-	50648	60435	91670	357270	414620	250240	1040400	709360	934920	449190	584840	591920	158270	82418	52452	581060	556900	705550	1732500	1533900	1882300	561140	563330	645900	544570	669310	725220	--	--
Zmhn001793	UPLC-MS/MS	341.09	179.03	-	-	342.096	C15H18O9	[M-H]-	6-O-Caffeoyl-D-glucose	6-O-咖啡酰-D-葡萄糖	Phenolic acids	酚酸类	Phenolic acids	酚酸类	-	1	-	208770	213350	477210	417040	382160	415890	417790	416880	374790	581290	819390	734690	386580	621840	227160	552140	843520	678040	378610	310030	407460	577980	768570	649300	301530	370800	486200	--	--
mws1333	UPLC-MS/MS	341.11	113	-	-	342.116	C12H22O11	[M-H]-	Melibiose	蜜二糖	Others	其它类	Saccharides and Alcohols	糖及醇类	585-99-9	1	-	621430	427650	618630	287340	314850	240560	595900	902770	529890	848230	629060	962580	1117600	875200	1151300	314050	269560	568510	592680	544720	663000	819990	775910	1225000	464790	539790	448800	C05402	ko00052,ko01100,ko02010
Lmsn000381	UPLC-MS/MS	341.11	89.02	-	-	342.116	C12H22O11	[M-H]-	D-Maltose	D-麦芽糖	Others	其它类	Saccharides and Alcohols	糖及醇类	69-79-4	1	-	979460	720210	539870	323420	378650	168800	1142800	1499400	1190400	3025800	1221000	1052600	679650	571070	1059000	213270	166390	471180	1448000	580390	1711800	1209700	1009500	1497500	392850	735260	734350	C01971	--
pme0519	UPLC-MS/MS	341.11	119.03	-	-	342.116	C12H22O11	[M-H]-	D-Sucrose	D-蔗糖	Others	其它类	Saccharides and Alcohols	糖及醇类	57-50-1	1	-	1231800	1041900	780850	489180	540650	297630	1596100	2661900	1701200	3531200	1366800	1890200	1319900	1034000	2307500	396740	462950	806400	1323900	1407300	2425300	1994500	2147600	2082400	970540	1533100	1855700	C00089	ko00052,ko00500,ko01100,ko01110,ko02010
mws5038	UPLC-MS/MS	341.11	89.02	-	-	342.116	C12H22O11	[M-H]-	Isomaltulose	异麦芽酮糖	Others	其它类	Saccharides and Alcohols	糖及醇类	13718-94-0	1	-	969750	786880	753430	262790	287750	199530	1073500	1191900	733140	3144500	1022200	1174600	1009500	861430	2418600	279090	268520	516540	1195600	1425100	1028400	1230800	1592200	1373500	1004100	809240	806780	C01742	--
MA10039641	UPLC-MS/MS	341.11	89.02	-	-	342.116	C12H22O11	[M-H]-	Lactobiose	乳二糖	Others	其它类	Saccharides and Alcohols	糖及醇类	63-42-3	1	-	934780	339970	270650	275700	356850	291850	864790	2014600	753500	1140100	1262400	1380900	903310	1185600	1330000	196880	120200	498300	1021800	1502300	965620	1364200	980330	2104700	715730	807000	703770	C00243	ko00052,ko01100,ko02010
Hmjp006104	UPLC-MS/MS	344.15	177.05	-	-	343.142	C19H21NO5	[M+H]+	N-Cis-Feruloyl-3'-O-methyldopamine	N-顺式阿魏酰基-3'-O-甲基多巴胺	Alkaloids	生物碱	Phenolamine	酚胺	-	3	-	2328800	2532500	1201800	2900900	4803500	2632000	9668200	7248100	4294600	1492000	1221900	796510	12515	9	9	13473	10689	16902	23774	21364	26423	9	11330	9177.3	1565700	1785100	1758200	--	--
Lmyn000503	UPLC-MS/MS	343.03	85.03	-	-	344.038	C13H12O11	[M-H]-	Mucic acid-1,4-lactone-2-O-gallate	粘酸-1,4-内酯-2-O-没食子酸酯	Phenolic acids	酚酸类	Phenolic acids	酚酸类	-	3	-	24758	63535	24137	319780	178190	438460	1030600	773370	770310	566790	381700	358110	367180	458920	191790	57964	201030	378410	847690	516600	522520	726930	898110	787870	641760	458960	373940	--	--
Zmhp004065	UPLC-MS/MS	345.1	330.07	-	-	344.089	C18H16O7	[M+H]+	7,8-Dihydroxy-5,6,4'-trimethoxyflavone	7,8-二羟基-5,6,4'-三甲氧基黄酮	Flavonoids	黄酮	Flavones	黄酮	-	1	-	1190.7	9	9	6705.3	9	9	11706	2379.8	9	8361.9	9	9	9	5565.9	4170.7	40551	22063	27332	268020	34014	116010	138770	37682	121830	32735	28939	26706	--	--
mws1474	UPLC-MS/MS	345.1	284	-	-	344.09	C18H16O7	[M+H]+	5,7-Dihydroxy-3',4',5'-trimethoxyflavone	5,7-二羟基-3',4',5'-三甲氧基黄酮	Flavonoids	黄酮	Flavones	黄酮	18103-42-9	2	-	9	9	9	8071.5	9	9	15544	9	9	8738.4	9	9	3117	8970.2	8175.4	66752	41274	43457	568450	99709	231610	239960	60863	215550	44509	63214	61305	C19807	--
pmp000786	UPLC-MS/MS	345.1	330.07	-	-	344.09	C18H16O7	[M+H]+	Eupatorin; 3',5-Dihydroxy-4',6,7-Trimethoxyflavone	泽兰黄素; 3',5-二羟基-4',6,7-三甲氧基黄酮	Flavonoids	黄酮	Flavones	黄酮	855-96-9	1	-	9	9	9	3782.7	9	9	8227.8	9	9	6160.5	9	9	9	9	3362.7	28526	12891	11448	151800	29794	67474	79316	21833	71175	11408	14201	15456	--	--
Lmmn000774	UPLC-MS/MS	343.1	181.05	-	-	344.111	C15H20O9	[M-H]-	Dihydrocaffeoylglucose	二氢咖啡酰葡萄糖	Phenolic acids	酚酸类	Phenolic acids	酚酸类	-	3	-	108510	205620	193830	199720	1049400	874470	252460	626520	2663200	134400	240720	337810	117110	142370	89460	146600	119110	78216	216790	251300	155340	125750	33612	36818	233220	360330	309390	--	--
Zmln000899	UPLC-MS/MS	343.11	181.05	-	-	344.111	C15H20O9	[M-H]-	Syringaldehyde-4-O-glucoside	丁香醛-4-O-葡萄糖苷	Phenolic acids	酚酸类	Phenolic acids	酚酸类	-	2	-	66516	257090	79886	28818	37925	10886	73450	104560	17267	34845	41254	26148	187340	378520	117690	79189	37269	62206	191320	85129	145380	37770	32007	81995	77367	94572	114030	--	--
Lmmn004685	UPLC-MS/MS	343.16	328.13	-	-	344.162	C20H24O5	[M-H]-	Nectandrin B	甘密树皮素 B	Lignans and Coumarins	木脂素和香豆素	Lignans	木脂素	74683-16-2	3	-	16086	81148	9	9	5143.4	9	4081	8619.8	9	9	9	9	9	9	9	9	9	9	9	9	9	9	9	9	4137.7	6043.5	4726.8	--	--
mws0609	UPLC-MS/MS	344.04	150	-	-	345.047	C10H12N5O7P	[M-H]-	Guanosine 3',5'-cyclic monophosphate	鸟苷 3',5'-环单磷酸	Nucleotides and derivatives	核苷酸及其衍生物	Nucleotides and derivatives	核苷酸及其衍生物	7665-99-8	2	-	187590	429680	504080	4414800	6864300	3249700	3979000	3782100	2474800	6781200	5810600	2518000	168140	357200	88252	1046500	3112300	1420300	1660100	2873300	2952600	2003700	4292300	3145300	1542000	2317800	1881100	C00942	ko00230,ko01100
pmb0801	UPLC-MS/MS	346.11	184.1	-	-	345.106	C14H19NO9	[M+H]+	4-Pyridoxic acid-O-glucoside	4-吡哆酸-O-葡萄糖苷	Others	其它类	Vitamin	维生素	-	3	-	28865	15527	18226	19223	8103.4	19880	39921	37439	28669	31881	21471	32874	14354	29609	36971	26296	49806	53188	56294	130560	59402	29822	49343	45436	32434	25485	26352	--	--
Lmtn000940	UPLC-MS/MS	345.08	139.04	-	-	346.09	C14H18O10	[M-H]-	1-O-(3,4-Dihydroxy-5-methoxy-benzoyl)-glucoside	1-O-(3,4-二羟基-5-甲氧基-苯甲酰)-葡萄糖苷	Phenolic acids	酚酸类	Phenolic acids	酚酸类	-	2	-	9	9	9	72606	117630	9	26237	101400	9	9	9	9	9	9	9	9	9	35074	38060	9	44066	9	9	42566	27165	13003	15620	--	--
Lmdn001560	UPLC-MS/MS	345.12	165.06	-	-	346.126	C15H22O9	[M-H]-	6-DeoxyCatalpol	6-脱氧梓醇	Terpenoids	萜类	Monoterpenoids	倍萜	99499-99-7	2	-	8042.4	15815	4389.1	62204	36221	26390	5972.1	8163.5	13606	12987	3949.2	2213.1	25417	39889	15767	80692	95796	126110	19039	11024	2792.1	11209	45993	18210	19534	21562	29238	--	--
Lmyp003381	UPLC-MS/MS	347.13	301.13	-	-	346.126	C15H22O9	[M+H]+	3,4,5-Trimethoxyphenyl-1-O-β-D-glucopyranoside	3,4,5-三甲氧基苯基-1-O-β-D-葡萄糖吡喃苷	Phenolic acids	酚酸类	Phenolic acids	酚酸类	-	3	-	318810	114040	418380	222750	123680	309100	248190	234660	557090	198820	143340	314650	322040	316010	149990	241160	263970	169690	236700	328500	156180	173600	209350	132780	118470	222930	200410	--	--
mws1629	UPLC-MS/MS	345.12	183.2	-	-	346.126	C15H22O9	[M-H]-	Aucubin	桃叶珊瑚苷	Terpenoids	萜类	Sesquiterpenoids	倍半萜	479-98-1	3	-	7107.5	9	9	32950	87558	94129	9	9	9	9	9	11741	49175	18435	30011	344570	477220	507950	45828	37029	26393	70034	45942	48492	46324	53057	57450	C09771	--
Cmrn003066	UPLC-MS/MS	345.16	165.09	-	-	346.163	C16H26O8	[M-H]-	Kankanoside P	甘蓝苷 P	Terpenoids	萜类	Monoterpenoids	倍萜	-	3	-	9	9	9	9	9	9	9	9	9	9	9	9	16981	35737	9	23213	26286	31432	70518	85981	59466	26410	28073	47002	32037	23391	32329	--	--
Cmrn002988	UPLC-MS/MS	345.16	101.02	-	-	346.163	C16H26O8	[M-H]-	Kankanoside A	甘蓝苷 A	Terpenoids	萜类	Monoterpenoids	倍萜	-	2	-	84710	77910	90994	38289	74208	65835	24390	24738	18871	183620	136340	121480	84168	53796	114180	27291	15884	3934.5	1176.6	4647	3001	2019	5282.5	6125.6	29641	27364	26039	--	--
pmp001047	UPLC-MS/MS	347.17	167.11	-	-	346.163	C16H26O8	[M+H]+	Jasminoside G	茉莉花苷 G	Terpenoids	萜类	Monoterpenoids	倍萜	871589-35-4	2	-	9	9	9	9	24211	16029	16938	32493	21880	1562000	2358400	2969300	20365	9	9	9	22276	9	9	28558	39616	1983100	1015500	3304600	530290	670290	654100	--	--
mws0874	UPLC-MS/MS	346.06	210.9	-	-	347.063	C10H14N5O7P	[M-H]-	3'-Adenylic Acid	3'-腺嘌呤核苷酸	Nucleotides and derivatives	核苷酸及其衍生物	Nucleotides and derivatives	核苷酸及其衍生物	84-21-9	2	-	17921	21244	12802	18867	18065	11053	11518	14946	9751.2	22988	38405	21764	15137	18080	13685	9528.9	12197	17720	19528	14427	16036	19497	39747	16384	16368	22683	18301	C01367	ko00230,ko01100
pmb0981	UPLC-MS/MS	348.07	136	-	-	347.063	C10H14N5O7P	[M+H]+	Adenosine 5'-monophosphate	腺苷-5'-单磷酸	Nucleotides and derivatives	核苷酸及其衍生物	Nucleotides and derivatives	核苷酸及其衍生物	61-19-8	3	-	6247300	6047500	5825300	202830	189280	165200	122840	119980	67269	575430	811750	502120	2445900	4321600	3591200	155320	157510	235360	112260	203320	209140	515090	562250	478930	1163500	1093200	1137100	C00020	ko00230,ko00908,ko01100,ko01110,ko01240
Lmhp011562	UPLC-MS/MS	353.27	261.22	-	-	352.261	C21H36O4	[M+H]+	1-α-Linolenoyl-glycerol	1-α-亚麻酸甘油酯	Lipids	脂质	Glycerol ester	甘油酯	-	2	-	13146	13447	34139	77488	81293	37870	60661	64615	34050	40442	36161	35645	3538.9	4835.6	2680.5	466220	363200	266150	1205300	1568000	530880	277210	226640	290650	91331	102900	105550	--	--
Lmhp011388	UPLC-MS/MS	353.27	261.22	-	-	352.261	C21H36O4	[M+H]+	2-α-Linolenoyl-glycerol	2-α-亚麻酸甘油酯	Lipids	脂质	Glycerol ester	甘油酯	55268-58-1	2	-	9936	13975	28318	33737	32589	11678	32422	40002	19683	13994	16476	13681	11286	9194.8	11834	377520	313600	280130	1331600	1261100	611440	147270	230850	209950	36666	41293	37991	--	--
MWSmce024	UPLC-MS/MS	355.1	193.05	-	-	354.095	C16H18O9	[M+H]+	Scopoletin-7-O-glucoside (Scopolin)	东莨菪内酯-7-O-葡萄糖苷 (东莨菪苷)	Lignans and Coumarins	木脂素和香豆素	Coumarins	香豆素	531-44-2	1	-	257330	1214300	7373300	3362200	6324100	4131800	1352000	3207800	3095600	11588000	7510400	8107000	380110	54900	192180	4335100	1820000	3993300	4531300	1228900	2584100	24599000	34849000	26405000	6363200	7132100	7163800	C01527	ko00940,ko01110
pme1816	UPLC-MS/MS	353.09	191	-	-	354.095	C16H18O9	[M-H]-	Neochlorogenic acid (5-O-Caffeoylquinic acid)*	新绿原酸 (5-O-咖啡酰奎宁酸)*	Phenolic acids	酚酸类	Phenolic acids	酚酸类	906-33-2	1	-	51017	44626	55925	399630	611940	284600	749340	518250	256890	726720	366540	168430	10138	10554	26478	76052	63129	121630	535270	256840	753700	263780	333570	458500	263610	232910	324280	C17147	--
mws2108	UPLC-MS/MS	353.09	191.05	-	-	354.095	C16H18O9	[M-H]-	Cryptochlorogenic acid (4-O-Caffeoylquinic acid)*	隐绿原酸 (4-O-咖啡酰奎宁酸)*	Phenolic acids	酚酸类	Phenolic acids	酚酸类	905-99-7	1	-	5226400	7542800	2442300	9579200	15502000	3711600	19109000	22640000	9552500	17447000	23368000	9389400	544310	114300	1493700	4033400	2983200	5035100	14245000	9253900	17572000	8665800	11272000	9678300	10306000	11163000	10898000	--	--
mws0178	UPLC-MS/MS	353.09	191.01	-	-	354.095	C16H18O9	[M-H]-	Chlorogenic acid (3-O-Caffeoylquinic acid)*	绿原酸 (3-O-咖啡酰奎宁酸)*	Phenolic acids	酚酸类	Phenolic acids	酚酸类	327-97-9	1	-	5449800	7727700	2408700	9503400	15381000	4368300	16416000	22339000	11859000	19537000	23388000	9469200	621150	115600	1565700	4009400	2861300	5291300	15223000	9087500	17269000	8322700	9626900	9887600	9863000	11035000	11483000	C00852	ko00940,ko00941,ko00945,ko01110
Lmgp008453	UPLC-MS/MS	355.12	163.04	-	-	354.11	C20H18O6	[M+H]+	Albanin A	Albanin A	Flavonoids	黄酮	Flavones	黄酮	73343-42-7	2	-	9	9	42852	9	9	9	9	9	9	9	9	9	84372	159770	194130	9	9	175390	9	9	446620	9	9	9	415150	439350	501710	--	--
Lmhp012042	UPLC-MS/MS	355.28	263.24	-	-	354.277	C21H38O4	[M+H]+	2-Linoleoylglycerol	2-亚油酰甘油酯	Lipids	脂质	Glycerol ester	甘油酯	3443-82-1	1	-	158560	255840	622730	377000	332020	277470	198990	181390	186160	609750	617250	571760	146560	106210	136720	335410	400850	314340	502580	359790	337870	137550	321730	198130	292540	352470	355440	--	--
Lmhp112042	UPLC-MS/MS	355.28	263.24	-	-	354.277	C21H38O4	[M+H]+	1-Linoleoylglycerol	1-亚油酰甘油酯	Lipids	脂质	Glycerol ester	甘油酯	2277-28-3	1	-	82843	86397	321670	130210	121790	110200	51729	38069	56529	202830	228880	176670	36799	20815	34653	183310	161790	151190	251430	210850	152020	367340	311460	370190	98027	129810	130580	--	--
Zmhn002422	UPLC-MS/MS	355.1	193.05	-	-	356.11	C16H20O9	[M-H]-	1-O-Feruloyl-β-D-glucose	1-O-阿魏酰-β-D-葡萄糖	Phenolic acids	酚酸类	Phenolic acids	酚酸类	7196-71-6	2	-	25118	10936	9010.5	717380	1402200	356200	2572100	2264800	1143800	1406200	2159500	453200	3652.9	1525.4	2740.1	223190	196390	369800	1784900	605830	1483300	232960	213110	340130	841010	694120	977240	C17759	--
pmb3056	UPLC-MS/MS	355.1	121.1	-	-	356.111	C16H20O9	[M-H]-	Homovanilloylquinic acid	高香草酰奎宁酸	Phenolic acids	酚酸类	Phenolic acids	酚酸类	-	3	-	9	9	9	60412	42786	137160	546540	114440	1077800	80196	14043	9	9	9	9	22929	33145	76801	93766	59095	289400	7556.7	14908	49079	69685	112960	111470	--	--
Hmmn002544	UPLC-MS/MS	355.1	193.05	-	-	356.111	C16H20O9	[M-H]-	Ferulic acid-4-O-glucoside	阿魏酸-4-O-葡萄糖苷	Phenolic acids	酚酸类	Phenolic acids	酚酸类	117405-51-3	3	-	87748	104980	104750	629160	1179400	593130	1168200	978740	491960	1250500	688190	388380	30870	4904.7	85809	156450	136040	231680	928630	493540	1664900	556990	776230	902710	417800	549570	533870	--	--
Lmcp005293	UPLC-MS/MS	357.13	137.06	-	-	356.126	C20H20O6	[M+H]+	6,7-Dimethoxy-2-[2-(3'-Hydroxy-4'-Methoxyphenyl)Ethyl]Chromone	6,7-二甲氧基-2-[2-(3-羟基-4-甲氧基)苯乙基]色酮	Others	其它类	Others	其它	-	1	-	136070	485340	280800	14883000	18746000	20058000	15118000	19097000	31958000	2071000	1029200	1241500	90314	307240	225130	4743200	829830	3089900	3034700	666010	4463000	400420	105800	222420	5349900	6344900	6041000	--	--
Lmdn009099	UPLC-MS/MS	355.12	193.05	-	-	356.126	C20H20O6	[M-H]-	Coniferyl ferulate	阿魏酸松柏酯	Phenolic acids	酚酸类	Phenolic acids	酚酸类	63644-62-2	3	-	21209	59895	28235	17034	58165	7337.4	6358.8	19906	9825.9	42988	49769	40926	81121	35346	142660	8307.5	5458.9	27048	12730	3045.6	54511	6416.9	12813	32131	43937	35291	40326	C17855	--
pmb0296	UPLC-MS/MS	357.3	265.4	-	-	356.293	C21H40O4	[M+H]+	1-Oleoyl-Sn-Glycerol	单酰甘油酯(18:1)	Lipids	脂质	Glycerol ester	甘油酯	129784-87-8	3	-	126370	40631	242780	70976	98023	101850	40904	32872	57072	106460	182050	104950	172030	109350	146050	187630	122400	173400	298310	217260	244690	223010	126700	229800	91764	126760	153460	--	--
Zmhn003082	UPLC-MS/MS	357.08	173.04	-	-	358.09	C15H18O10	[M-H]-	5-O-Galloyl-methyl quinine ester	5-O-没食子酰-奎宁酸甲酯	Phenolic acids	酚酸类	Phenolic acids	酚酸类	-	3	-	9	9	9	9	9	9	9	9	9	9	9	9	27079	37123	13790	99744	119910	58977	305540	244100	176610	69160	62080	67955	38548	57337	47451	--	--
Zmdp006307	UPLC-MS/MS	359.15	137.06	-	-	358.142	C20H22O6	[M+H]+	sanshodiol	sanshodiol	Lignans and Coumarins	木脂素和香豆素	Lignans	木脂素	-	1	-	439100	314570	430530	38183000	8802900	2182400	5519400	6175300	14692000	1520200	5058900	909980	2795200	8154800	10299000	16061000	9606700	23393000	16011000	1813000	29078000	1561400	685930	1357800	5015100	6273700	5746900	--	--
Hmlp003129	UPLC-MS/MS	359.15	137.06	-	-	358.142	C20H22O6	[M+H]+	Matairesinol	罗汉松树脂醇	Lignans and Coumarins	木脂素和香豆素	Lignans	木脂素	580-72-3	1	-	397390	295270	396280	37802000	8236600	2143200	4817000	6217500	14329000	1266000	4826300	883610	2563800	8264400	10125000	16162000	9110400	21412000	15031000	1611000	29499000	1438700	592320	1283200	4906700	5441600	6075100	C10682	ko00998,ko01100,ko01110
Lmdn004267	UPLC-MS/MS	357.13	151.04	-	-	358.142	C20H22O6	[M-H]-	Epipinoresinol	表松脂醇	Lignans and Coumarins	木脂素和香豆素	Lignans	木脂素	24404-50-0	1	-	98822	113240	342800	840820	30917000	968720	1916000	40039000	2887800	3233700	3257000	1596800	30306	20597	34880	5416500	480230	10777000	14836000	240100	10829000	14191000	1358500	6500200	6156300	7858600	6875800	--	--
Lmsp004450	UPLC-MS/MS	359.15	131.05	-	-	358.142	C20H22O6	[M+H]+	Dehydrodiconiferyl alcohol	脱氢双松柏醇	Phenolic acids	酚酸类	Phenolic acids	酚酸类	97465-82-2	1	-	412030	371520	502180	1721800	2898800	1357900	335880	666640	433650	498640	428130	249000	147960	174710	148200	754480	719060	907070	356150	106030	261480	337460	257280	271290	423170	610490	465850	--	--
mws0097	UPLC-MS/MS	357.13	151	-	-	358.142	C20H22O6	[M-H]-	Pinoresinol	松脂醇	Lignans and Coumarins	木脂素和香豆素	Lignans	木脂素	487-36-5	1	-	106860	106400	347060	956000	31976000	1171900	2129300	46072000	2936000	3558700	3828000	2125600	63660	37356	37499	6660500	513930	12359000	15215000	248330	13296000	14484000	1484900	6897800	5901800	8330500	7582000	C05366	ko00998,ko01100,ko01110
pmb3107	UPLC-MS/MS	359.1	182.1	-	-	360.106	C15H20O10	[M-H]-	Glucosyringic Acid	葡萄糖基丁香酸	Phenolic acids	酚酸类	Phenolic acids	酚酸类	-	3	-	289630	574070	227360	470280	772650	1212200	171080	197720	287870	439470	910860	3166200	985480	583790	739800	3062100	3197300	2589300	4678500	3881100	4386600	12649000	9266800	13205000	2486800	3288400	3188200	--	--
Lmyn000716	UPLC-MS/MS	361.04	209.03	-	-	362.049	C13H14O12	[M-H]-	2-O-Galloylmucic acid	2-O-没食子酰基粘酸	Phenolic acids	酚酸类	Phenolic acids	酚酸类	-	3	-	630020	581790	280050	3226800	644370	3096700	3818200	4335800	3621700	6036300	8096200	11093000	2018300	760040	2813700	662660	468100	768560	7879900	5350200	4715900	9883600	11119000	13222000	7345800	8674500	8565000	--	--
pmb0998	UPLC-MS/MS	364.07	152.1	-	-	363.058	C10H14N5O8P	[M+H]+	Guanosine 5'-monophosphate	鸟苷 5'-单磷酸	Nucleotides and derivatives	核苷酸及其衍生物	Nucleotides and derivatives	核苷酸及其衍生物	85-32-5	2	-	306130	299840	381690	339030	664270	424420	133210	144300	105020	519200	472330	329220	131430	280620	143810	320380	346240	453810	210020	251840	164820	358200	413540	234800	242220	215690	213960	C00144	ko00230,ko01100
mws5040	UPLC-MS/MS	365.11	203.05	-	-	364.078	C12H21O11Na	[M+H]+	Turanose	松二糖	Others	其它类	Saccharides and Alcohols	糖及醇类	547-25-1	3	-	643320	363910	601200	50665	214420	104400	29749	95700	51491	95839	85930	265550	908090	1515400	813920	158750	266490	300000	99011	91672	136350	45131	81683	147300	388930	388040	355360	C19636	--
Smjp005798	UPLC-MS/MS	365.1	321.11	-	-	364.095	C21H16O6	[M+H]+	justicidin B	爵床脂素 B	Lignans and Coumarins	木脂素和香豆素	Lignans	木脂素	82001-16-9	2	-	7026.3	684650	37200	9	9	9	9	9	2234	9	9	9	26157	41265	90598	9	9	9	9	9	9	9	9	9	25800	29709	30447	C10636	--
pmb0964	UPLC-MS/MS	366.2	204.1	-	-	365.17	C16H23N5O5	[M+H]+	Isopentenyladenine-7-N-glucoside	异戊烯基腺苷-7-N-葡萄糖苷	Nucleotides and derivatives	核苷酸及其衍生物	Nucleotides and derivatives	核苷酸及其衍生物	-	3	-	60937	59623	23030	24709	62315	32334	31629	86803	22117	51503	60284	48664	88702	116700	87973	58224	35787	129770	52166	53778	93825	42632	21002	80519	49252	38432	59245	--	--
Lmgp003270	UPLC-MS/MS	369.16	177.06	-	-	368.074	C16H16O10	[M+H]+	Scopoletin-7-O-glucuronide	东莨菪内酯-7-O-葡萄糖醛酸苷	Lignans and Coumarins	木脂素和香豆素	Coumarins	香豆素	132752-65-9	2	-	2647500	3255500	3153400	3918700	2698900	3646600	8239700	8752500	10125000	19388000	16058000	13900000	149380	67346	307090	3680600	3456800	6090300	12517000	7027100	15031000	9672100	10487000	12562000	8489900	8050600	7817300	--	--
pmb0752	UPLC-MS/MS	369.12	177.1	-	-	368.111	C17H20O9	[M+H]+	3-O-Feruloylquinic acid*	3-O-阿魏酰奎宁酸*	Phenolic acids	酚酸类	Phenolic acids	酚酸类	1899-29-2	1	-	1478200	434630	713630	516440	689940	779490	431770	382150	625000	1229900	513990	371900	26994	31724	114700	633530	484410	657830	2710100	1829300	3607300	1715700	1988900	2369100	845850	1035700	899620	C02572	--
Lmgn003073	UPLC-MS/MS	735.22	367.11	-	-	368.111	C17H20O9	[2M-H]-	5-O-Feruloylquinic acid*	5-O-阿魏酰奎尼酸*	Phenolic acids	酚酸类	Phenolic acids	酚酸类	-	1	-	101240	145500	134640	147960	99590	193300	732370	1221000	1333900	2683900	2089500	1865600	9	9	9	174250	108850	343390	1809000	414620	2133900	951930	1003700	1408700	522830	687270	672290	--	--
pma3724	UPLC-MS/MS	369.1	177.1	-	-	368.111	C17H20O9	[M+H]+	1-O-Feruloylquinic acid*	1-O-阿魏酰奎宁酸*	Phenolic acids	酚酸类	Phenolic acids	酚酸类	-	1	-	2250400	2704800	2456400	3275400	2412600	3337100	6083100	7656700	7966600	17968000	12064000	11167000	111030	75548	213560	3417400	2743700	4790800	10747000	5454700	13751000	8397800	8549700	10039000	6147400	6605300	6881500	--	--
MWSmce025	UPLC-MS/MS	369.09	207.03	-	-	370.09	C16H18O10	[M-H]-	Fraxetin-8-O-glucoside (Fraxin)	秦皮苷	Lignans and Coumarins	木脂素和香豆素	Coumarins	香豆素	524-30-1	2	-	758630	499220	1167000	334500	953040	351660	172560	445750	181710	558680	290650	76693	193120	30511	38026	264140	255740	291580	247570	60168	256060	74475	48253	119590	196330	304250	325160	C09266	--
Lmbp002309	UPLC-MS/MS	371.1	209.05	-	-	370.126	C17H22O9	[M+H]+	Sinapaldehyde-4-O-Glucoside	芥子醛-4-O-葡萄糖苷	Phenolic acids	酚酸类	Phenolic acids	酚酸类	154461-65-1	2	-	1719300	7443400	6038200	16096	69113	51354	2966.3	9461.8	14544	7396.8	2266.3	1122.4	4497600	2681000	3701000	100860	215240	128710	31196	38461	47348	19050	4993	21908	540020	624330	501700	--	--
pmb3317	UPLC-MS/MS	371.1	179.1	-	-	372.106	C16H20O10	[M-H]-	Quinacyl syringic acid	奎宁酰丁香酸	Phenolic acids	酚酸类	Phenolic acids	酚酸类	-	3	-	9	9	75699	63161	156970	9	149990	199340	9	9	60602	9	309070	9	214550	191710	133270	9	9	302160	9	9	9	255500	215700	305590	189770	--	--
pmn001695	UPLC-MS/MS	371.1	249.06	-	-	372.106	C16H20O10	[M-H]-	Trihydroxycinnamoylquinic acid	三羟基肉桂酰奎宁酸	Phenolic acids	酚酸类	Phenolic acids	酚酸类	-	1	-	12035000	9810000	13650000	14977000	14932000	17713000	10832000	8212100	14560000	5925900	6219600	7349600	21431000	11824000	9888700	17626000	12178000	15168000	19599000	10689000	25198000	10048000	3984200	13276000	9956600	11528000	13162000	--	--
Hmgn004693	UPLC-MS/MS	371.11	327.03	-	-	372.121	C20H20O7	[M-H]-	(8'R,7'S)-(-)-8-Hydroxy-α-conidendrin	羟基铁杉脂素	Lignans and Coumarins	木脂素和香豆素	Lignans	木脂素	-	3	-	49236	376730	30542	9	9	9	9	9	9	9	9	9	9	9	9	9	9	9	9	9	9	9	9	9	22390	33804	18185	--	--
Zmgp003492	UPLC-MS/MS	373.12	105.03	-	-	372.121	C20H20O7	[M+H]+	8-Hydroxy-α-conidendrin	8-羟基-α-铁杉脂素	Lignans and Coumarins	木脂素和香豆素	Lignans	木脂素	-	2	-	224160	155650	212200	223930	329070	263170	227800	200180	305940	68896	58872	109460	475980	153120	266740	419200	322010	202840	322270	227880	282080	110150	63108	180730	226500	214480	170750	--	--
Lmap001661	UPLC-MS/MS	373.15	137.06	-	-	372.142	C17H24O9	[M+H]+	Grevilloside C	银桦苷 C	Phenolic acids	酚酸类	Phenolic acids	酚酸类	1094004-47-3	2	-	403660	285470	316570	128480	200770	141640	94391	90251	91366	33127	39683	34873	508980	749650	591520	241330	219110	197070	163990	106250	136430	73405	50420	65807	181370	181630	169270	--	--
pmp000674	UPLC-MS/MS	373.16	337.14	-	-	372.157	C21H24O6	[M+H]+	Phillygenin	连翘脂素	Lignans and Coumarins	木脂素和香豆素	Lignans	木脂素	487-39-8	2	-	9	9	18664	21210	9	9	9	13849	9	9	35797	9	75366	527350	217350	9	9	9	9	9	9	9	9	9	51672	59039	50665	--	--
Hmln003558	UPLC-MS/MS	371.15	136.05	-	-	372.157	C21H24O6	[M-H]-	Arctigenin	牛蒡子苷元	Lignans and Coumarins	木脂素和香豆素	Lignans	木脂素	7770-78-7	2	-	6886	3441.5	35876	26176	9147.3	4862.8	6832.4	24542	14464	24602	77510	11650	183710	1225700	578610	2407	4994.4	14505	1457.5	9	12585	882.21	9	9	89556	110270	109360	C10545	--
pmb0108	UPLC-MS/MS	375.2	137.1	-	-	374.1	C19H18O8	[M+H]+	Feruloyl syringic acid	阿魏酰丁香酸	Phenolic acids	酚酸类	Phenolic acids	酚酸类	-	3	-	43516	26907	70073	116610	190040	216440	31393	76737	37906	129750	171720	145200	40058	76407	15124	65542	142160	65648	104780	29012	10602	256460	784060	179310	80253	66402	92623	--	--
mws1574	UPLC-MS/MS	373.11	123	-	-	374.121	C16H22O10	[M-H]-	Geniposidic acid	京尼平苷酸	Terpenoids	萜类	Monoterpenoids	倍萜	27741-01-1	2	-	995540	742150	982610	100620	225600	25874	138730	339860	104090	69322	56294	56603	29553	26058	35916	9	7288.1	9	9	9	9	9	9	31010	77136	101930	112270	C11673	ko00902,ko01110
Lmdn001501	UPLC-MS/MS	373.11	123.05	-	-	374.121	C16H22O10	[M-H]-	Gardoside	栀子新苷	Terpenoids	萜类	Monoterpenoids	倍萜	54835-76-6	2	-	951210	729780	967650	98863	220020	37376	135140	314230	87940	46592	61812	61918	40893	9	46072	9	9	9	9	9	9	9	9	28808	90176	118940	122340	C16963	--
Cmlp002163	UPLC-MS/MS	375.13	213.08	-	-	374.121	C16H22O10	[M+H]+	Gentioflavoside	龙胆黄苷	Terpenoids	萜类	Monoterpenoids	倍萜	34239-17-3	2	-	342410	350310	49335	246150	397970	201300	198880	167270	192960	216490	201930	152980	35744	54641	46412	221990	144100	118110	124150	171940	121360	78683	111400	38361	111040	131490	160990	--	--
Hmlp002744	UPLC-MS/MS	375.14	137.06	-	-	374.136	C20H22O7	[M+H]+	Nortrachelogenin	去甲络石苷元	Lignans and Coumarins	木脂素和香豆素	Lignans	木脂素	34444-37-6	2	-	113420	120040	257440	1369400	3223700	1577700	580040	1103600	1660100	102720	135920	77779	15881	155730	30776	394250	68883	293440	187140	48771	293000	44950	24347	24656	329940	411200	403780	C10725	--
pmp000675	UPLC-MS/MS	375.14	151.03	-	-	374.137	C20H22O7	[M+H]+	Forsythialan A	Forsythialan A	Lignans and Coumarins	木脂素和香豆素	Lignans	木脂素	1019859-20-1	2	-	248790	225570	584190	724170	4370300	554360	321420	5223600	435050	327140	363700	230150	283920	307210	216640	1520100	560250	2164100	2403900	60452	2850500	1342900	123910	410240	926220	1046100	1087300	--	--
Zmdn005358	UPLC-MS/MS	373.13	313.1	-	-	374.137	C20H22O7	[M-H]-	Vladinol D	Vladinol D	Lignans and Coumarins	木脂素和香豆素	Lignans	木脂素	-	2	-	4168	5077.5	39856	128840	3728900	210160	183760	2898300	290700	47200	55630	78186	10783	30276	29695	852830	106130	1935200	1645100	23436	1696800	1112000	43588	315580	507900	632640	681270	--	--
Lmzn001983	UPLC-MS/MS	375.13	135.05	-	-	376.137	C16H24O10	[M-H]-	D-Threo-guaiacylglycerol-7-O-β-D-glucoside	D-苏式-愈创木基甘油-7-O-β-D-葡萄糖苷	Phenolic acids	酚酸类	Phenolic acids	酚酸类	-	1	-	67900	95319	314210	120500	108740	202340	37752	61309	69383	97382	73218	80046	264420	280670	398210	203980	252380	445570	80716	131110	112820	844850	1729500	1073000	247620	292000	307590	--	--
mws0232	UPLC-MS/MS	377.15	243	-	-	376.138	C17H20N4O6	[M+H]+	Riboflavin (Vitamin B2)	核黄素 (维生素 B2)	Others	其它类	Vitamin	维生素	83-88-5	1	-	3519600	4562600	7581300	686860	811680	1049100	2206400	2054900	2668300	1818500	1596600	2262900	340880	1806600	371080	446150	559170	679040	779020	1227900	871640	952580	888730	1040800	1718400	2004500	1882400	C00255	ko00740,ko01100,ko01110,ko01240,ko02010
Hmap007816	UPLC-MS/MS	383.22	163.04	-	-	382.214	C24H30O4	[M+H]+	Feselol	Feselol	Lignans and Coumarins	木脂素和香豆素	Coumarins	香豆素	51020-36-1	3	-	9	3151.5	9	38821	70342	40599	140540	232930	150320	353860	392850	528210	9	9	9	9	9	9	9	9	9	9	9	9	114610	115320	107730	--	--
pme3337	UPLC-MS/MS	384.12	252	-	-	383.108	C14H17N5O8	[M+H]+	Succinyladenosine	琥珀酰腺苷	Nucleotides and derivatives	核苷酸及其衍生物	Nucleotides and derivatives	核苷酸及其衍生物	4542-23-8	1	-	5086300	8745200	4199000	660250	1331400	675250	748240	843110	757700	2252000	2900200	2884700	7223200	5141400	4498000	1202300	1002600	1519200	1210700	1021800	991210	3084500	2438000	2198900	2397300	2405100	2456200	--	--
Lmjp003090	UPLC-MS/MS	385.11	223.06	-	-	384.106	C17H20O10	[M+H]+	Isofraxidin-7-O-glucoside	异秦皮啶-7-O-葡萄糖苷	Lignans and Coumarins	木脂素和香豆素	Coumarins	香豆素	483-91-0	2	-	9	9	447280	9	9	9	46605	9	35896	9	19456	9	93200	297790	36124	588110	73370	697060	2806500	122160	2659700	947460	68209	1077300	390660	500570	402840	--	--
Zmcp102801	UPLC-MS/MS	385.11	223.06	-	-	384.106	C17H20O10	[M+H]+	Saikochromoside A	柴胡色原酮苷A	Others	其它类	Others	其它	-	1	-	4987900	45774000	19143000	25798000	31208000	9918800	18436000	26718000	15541000	6468900	3840300	4211400	14990	41617	15746	9505.9	4629.5	9980.5	17864	4614	11627	1105900	288270	1387600	6649600	8957900	9117400	--	--
Zmcp001750	UPLC-MS/MS	385.11	223.06	-	-	384.106	C17H20O10	[M+H]+	Eleutheroside B1	刺五加苷 B1	Lignans and Coumarins	木脂素和香豆素	Coumarins	香豆素	16845-16-2	1	-	211720	1049500	326290	2318900	4799700	1457200	5167900	13734000	8237000	766980	687240	753560	19585	22103	9	9	15601	27679	9	11210	15355	316280	58953	1131700	1651100	1747500	2010100	--	--
Lmbp003208	UPLC-MS/MS	385.12	223.06	-	-	384.106	C17H20O10	[M+H]+	Fraxidin-8-O-glucoside	秦皮啶-8-O-葡萄糖苷	Lignans and Coumarins	木脂素和香豆素	Coumarins	香豆素	-	1	-	156070	856990	224550	2313600	3873800	925500	4971400	12231000	7521200	667360	634370	680380	10130	24314	6480.2	11122	8502	16089	11208	10676	3998.4	246560	41699	627680	1360700	1330200	1725100	--	--
pme1286	UPLC-MS/MS	385.13	250	-	-	384.122	C14H20N6O5S	[M+H]+	S-(5'-Adenosy)-L-homocysteine	S-(5-腺苷)-L-高半胱氨酸	Amino acids and derivatives	氨基酸及其衍生物	Amino acids and derivatives	氨基酸及其衍生物	979-92-0	1	-	140000	22978	102670	109820	110090	81115	74892	59672	48258	373190	234700	194470	14869	7131.7	10497	33903	51464	24885	41243	70404	27608	288210	347290	214880	72288	95625	70347	C00021	ko00270,ko01100,ko01230,ko01240
pmb3062	UPLC-MS/MS	385.1	151.1	-	-	386.102	C17H22O10	[M-H]-	1-O-Eudesmoylquinic acid	1-O-菊酯酰奎宁酸	Phenolic acids	酚酸类	Phenolic acids	酚酸类	-	2	-	17173	4176.2	6190.6	44543	29130	53988	275650	267680	435520	36920	27678	33745	9	9	9	97439	113260	95346	399580	192920	476050	102960	60629	9	67756	128820	69174	--	--
Zmhn002227	UPLC-MS/MS	385.11	223.06	-	-	386.121	C17H22O10	[M-H]-	4-O-Glucosyl-sinapate	4-O-葡萄糖基芥子酸	Phenolic acids	酚酸类	Phenolic acids	酚酸类	-	3	-	199680	154160	191130	125510	99738	353170	60712	67818	97701	1190300	921210	1437000	830840	152250	310290	141300	205290	232380	135100	76819	140150	2642700	2390900	2330900	411290	715830	598920	C02919	--
HJN003	UPLC-MS/MS	385.11	223.06	-	-	386.122	C17H22O10	[M-H]-	1-O-Sinapoyl-D-glucose	1-O-芥子酰-D-葡萄糖	Phenolic acids	酚酸类	Phenolic acids	酚酸类	-	3	-	31666	20047	9843.2	121660	64282	162820	272460	292820	199680	356230	781130	651820	53885	28729	46414	518880	351720	272710	340340	485560	284120	1735600	2261000	2427800	371000	506650	585340	C01175	ko00940
Zmbp010005	UPLC-MS/MS	387.14	245.08	-	-	386.137	C21H22O7	[M+H]+	Pteryxin	Pteryxin	Lignans and Coumarins	木脂素和香豆素	Coumarins	香豆素	13161-75-6	3	-	9	9	9	9	9	9	9	9	9	9	9	9	28564	58010	41730	9	9	9	9	25736	9192.5	44098	28992	17804	10742	15318	13463	--	--
Lmzp006972	UPLC-MS/MS	387.18	151.08	-	-	386.173	C22H26O6	[M+H]+	Dimethylmatairesinol	二甲基罗汉松树脂酚	Lignans and Coumarins	木脂素和香豆素	Lignans	木脂素	25488-59-9	1	-	9	9	16522	90062	9	9	422960	9	25886	469210	15871	14482	172470	335340	294780	9	9771.3	46451	11700	9	323290	9	9	40113	72403	92510	86910	--	--
Smgp009046	UPLC-MS/MS	387.17	151.07	-	-	386.173	C22H26O6	[M+H]+	Pinoresinol dimethy ether	松脂醇二甲醚	Lignans and Coumarins	木脂素和香豆素	Lignans	木脂素	29106-36-3	2	-	9	9	9	98809	9	9	437320	9	9	534370	12614	9	140720	312890	290070	9	9	41006	9	9	322930	9	9	44440	74258	77599	87771	C10561	--
Lmmp003215	UPLC-MS/MS	387.2	207.14	-	-	386.194	C19H30O8	[M+H]+	Icariside B2	淫羊藿次苷 B2	Others	其它类	Others	其它	108906-51-0	1	-	6011.7	8206.5	2729	130700	65421	142930	1507000	388260	1087400	111340	24554	216990	37156	8507	7239	209620	143890	775710	1293500	1236200	2950400	168230	146480	795700	469810	528880	534730	--	--
Cmdp003280	UPLC-MS/MS	389.13	227.09	-	-	388.137	C17H24O10	[M+H]+	7-Dehydroxyzaluzioside	7-Dehydroxyzaluzioside	Terpenoids	萜类	Monoterpenoids	倍萜	-	3	-	9171.8	37811	9941	443260	381560	380480	718520	290990	570930	172660	113460	163370	16826	50706	49028	1980100	1487300	1705900	1958100	1001700	1357100	490420	538730	697740	537450	688170	699280	--	--
Lmzn001582	UPLC-MS/MS	387.17	207.1	-	-	388.174	C18H28O9	[M-H]-	5'-Glucosyloxyjasmanic acid	5'-葡萄糖基氧代茉莉酸	Phenolic acids	酚酸类	Phenolic acids	酚酸类	-	2	-	2956800	2354700	2460400	362570	331250	431210	553860	369930	1955500	2918500	1030200	1768700	2964800	4301300	3318300	173480	278570	490260	199000	200900	284440	455200	588470	1387900	694210	984880	1036900	--	--
Zmjp003597	UPLC-MS/MS	389.21	191.15	-	-	388.21	C19H32O8	[M+H]+	Ampelopsisionoside	蛇葡萄紫罗兰酮糖苷	Others	其它类	Others	其它	-	2	-	36459	18436	10834	43207	21703	23618	197950	364810	210970	388850	688880	742140	9	34136	25088	140030	129670	363390	410730	269730	1101500	2927500	911730	4902300	547940	655180	701130	--	--
Lmwp011196	UPLC-MS/MS	391.28	149.02	-	-	390.277	C24H38O4	[M+H]+	Bis(2-ethylhexyl)phthalate	邻苯二甲酸二(2-乙基己基)酯	Phenolic acids	酚酸类	Phenolic acids	酚酸类	117-81-7	3	-	1704300	1378400	2283000	1000100	584930	912660	807400	480710	1370200	631130	209440	836050	1805900	2018900	1365200	702140	1812900	805610	1502500	1310300	1169600	3039600	3647600	1520700	176170	182300	234280	C03690	--
pmb0489	UPLC-MS/MS	397.2	147.04	-	-	396.19	C19H28N2O7	[M+H]+	N-Glucosyl-p-coumaroylputrescine	N-葡萄糖基对香豆酰腐胺	Alkaloids	生物碱	Phenolamine	酚胺	-	3	-	11368	15417	10978	2194	5072.3	3389.9	10500	15675	9015.9	3898.8	3431.4	3923.2	14116	11318	19034	11048	6130.4	14386	34023	20465	26235	10386	6582.6	11756	6479.9	8411.4	10445	--	--
pme2735	UPLC-MS/MS	399.2	250	-	-	398.137	C15H22N6O5S	[M+H]+	S-Adenosyl-L-methionine	S-腺苷-L-蛋氨酸	Amino acids and derivatives	氨基酸及其衍生物	Amino acids and derivatives	氨基酸及其衍生物	29908-03-0	3	-	33057	85046	114150	78970	55899	33745	281990	250940	111990	275790	459100	208580	1530.6	2877.8	5259.8	16483	5520.5	13800	55639	50551	53106	217400	169330	146020	117410	113060	76409	C00019	ko00261,ko00270,ko00330,ko00908,ko01100,ko01110,ko01230,ko01240,ko04122
Cmbp005948	UPLC-MS/MS	401.12	163.04	-	-	400.116	C21H20O8	[M+H]+	1-O-p-Hydroxycinnamoyl-3-O-caffeoylglycerol	1-O-对羟基肉桂酰基-3-O-咖啡酰甘油	Phenolic acids	酚酸类	Phenolic acids	酚酸类	-	3	-	16564	9	9	87071	59748	96008	97262	185000	64549	820170	698990	291400	9	9927.6	9	74146	92847	75174	286080	298340	299150	137960	260620	318790	168220	171220	234850	--	--
Hmbn005456	UPLC-MS/MS	399.11	163.04	-	-	400.116	C21H20O8	[M-H]-	1-O-Caffeoyl-3-O-p-coumaroylglycerol	1-O-咖啡酰-3-O-对香豆酰甘油	Lipids	脂质	Glycerol ester	甘油酯	-	3	-	9	9	9	7641.1	14121	9	11913	13526	9	645590	120740	143920	9	9	9	9	9	9	9	9	9	9	46053	55743	60202	63952	70312	--	--
Hmln003529	UPLC-MS/MS	401.15	269.11	-	-	402.152	C18H26O10	[M-H]-	Benzyl β-primeveroside	苯甲酰樱草糖苷	Phenolic acids	酚酸类	Phenolic acids	酚酸类	130622-31-0	1	-	9	6995.8	9	31324	61580	66143	128170	56682	102420	127470	72694	78799	9	9	9	3366.2	9	2236.5	1119.8	9	9	2802.8	1677	9	27380	33187	47510	--	--
Cmjn004337	UPLC-MS/MS	401.14	269.1	-	-	402.153	C18H26O10	[M-H]-	Benzyl-(2''-O-xylosyl)glucoside	苄基-(2''-O-木糖基)葡萄糖苷	Phenolic acids	酚酸类	Phenolic acids	酚酸类	-	1	-	865870	1506300	1645500	322180	729910	1318600	810270	582140	587490	283700	369530	561750	1196300	1235400	1277700	217470	202430	227250	59710	100170	60170	51998	105360	109050	575160	663670	444080	--	--
pme3007	UPLC-MS/MS	402.99	159	-	-	404.002	C9H14N2O12P2	[M-H]-	Uridine 5'-diphosphate	尿苷 5'-二磷酸	Nucleotides and derivatives	核苷酸及其衍生物	Nucleotides and derivatives	核苷酸及其衍生物	27821-45-0	3	-	96441	84341	85650	27486	25161	32959	12875	12338	18066	27462	23740	25246	50408	54511	62780	31220	29790	24397	19738	19420	14010	16190	29955	20015	27178	32564	32512	C00015	ko00240,ko00908,ko01100,ko01240
pmd0153	UPLC-MS/MS	409.24	153	-	-	410.243	C19H39O7P	[M-H]-	LysoPA 16:0	溶血卵磷脂酸 16:0	Lipids	脂质	Glycerol ester	甘油酯	22002-85-3	3	-	149560	285030	161930	9	9	9	9	9	9	9	9	9	9	9	9	9	9	9	9	9	9	9	9	9	52486	81698	72120	C04036	--
Hmhp002580	UPLC-MS/MS	413.14	136.07	-	-	412.133	C19H24O10	[M+H]+	Methylpicraquassioside A	Methylpicraquassioside A	Lignans and Coumarins	木脂素和香豆素	Coumarins	香豆素	-	1	-	77901	107450	81542	111870	82450	109620	84890	62800	62653	53923	51847	61738	202830	135410	193890	78610	89620	85807	109260	74827	65663	43752	56371	71738	65560	80358	73781	--	--
Lmhn001773	UPLC-MS/MS	416.06	179.03	-	-	415.054	C19H13NO10	[M-H]-	Caffeoylnicotinoyltartaric acid	咖啡酰烟酰酒石酸	Phenolic acids	酚酸类	Phenolic acids	酚酸类	-	3	-	127810	68303	90869	666120	1648800	470280	1030200	907990	560370	1113800	625140	261100	4627.7	4812	29025	128210	84471	282390	678640	545390	746000	255990	1110200	901470	261970	537830	370130	--	--
mws0071	UPLC-MS/MS	415.1	269.05	-	-	416.111	C21H20O9	[M-H]-	Apigenin-4'-O-rhamnoside	芹菜素-4'-O-鼠李糖苷	Flavonoids	黄酮	Flavones	黄酮	133538-77-9	3	-	9	9	9	7051	11857	12456	42080	41313	33924	9	9	9	9	9	9	9	9	9	9	9	9	9	9	9	7250.2	7233.1	5163	--	--
Cmbn003192	UPLC-MS/MS	415.13	161.03	-	-	416.132	C18H24O11	[M-H]-	Regaloside K	王百合苷K	Phenolic acids	酚酸类	Phenolic acids	酚酸类	138772-00-6	3	-	102580	278970	138950	148450	128380	121940	22888	27695	9	19201	23044	11500	9	10125	9	53612	40647	32977	106510	102980	65993	46723	39737	47793	45275	60516	46398	--	--
Smgp109120	UPLC-MS/MS	417.19	151.07	-	-	416.184	C23H28O7	[M+H]+	epimagnolin	epimagnolin	Lignans and Coumarins	木脂素和香豆素	Lignans	木脂素	-	3	-	9	9	9	9	9	9	9	9	9	9	9	9	1153900	1369300	762620	9	9	9	9	9	9	9	9	9	45285	48800	64643	--	--
Lmbp003668	UPLC-MS/MS	419.1	287.05	-	-	418.09	C20H18O10	[M+H]+	Kaempferol-3-O-arabinoside	山奈酚-3-O-阿拉伯糖苷	Flavonoids	黄酮	Flavonols	黄酮醇	-	1	-	9	12595	14012	389320	432060	365870	2404000	4211100	5641200	18518000	28803000	12101000	9	9	9	9	9	9	9	9	9	9	46051	9	3689000	3880600	3830300	--	--
Hmcn002743	UPLC-MS/MS	417.15	181.04	-	-	418.162	C22H26O8	[M-H]-	Lirioresinol A	鹅掌揪树脂醇 A	Lignans and Coumarins	木脂素和香豆素	Lignans	木脂素	-	1	-	30646	390080	41927	4830300	3419500	1926600	146890	281460	163920	113650	115470	214720	15266	12353	77384	3196800	4521400	5277700	302220	89070	264350	247460	288820	436590	545040	761920	652790	--	--
MWS20152	UPLC-MS/MS	417.16	402.1	-	-	418.163	C22H26O8	[M-H]-	Syringaresinol	丁香树脂酚	Lignans and Coumarins	木脂素和香豆素	Lignans	木脂素	21453-71-4	1	-	5077	67743	7279.5	911560	568400	332070	27109	44841	23965	18405	22139	38954	3592.2	1521.5	16699	544260	731070	1031100	46392	15212	51874	47807	51605	74450	88986	140480	120610	C10889	--
mws2523	UPLC-MS/MS	421.08	241.1	-	-	422.083	C12H23O14P	[M-H]-	Trehalose 6-phosphate	海藻糖-6-磷酸	Others	其它类	Saccharides and Alcohols	糖及醇类	4484-88-2	3	-	51758	30483	50805	5562.5	7889.3	4839.4	3348.5	3999.3	4577	30593	20345	23087	66756	79626	49811	2065	2925.3	4802.5	6167	8104.8	4208.1	24216	33485	21029	13220	17195	18202	C00689	ko00500,ko01100,ko01110
Zmbp003590	UPLC-MS/MS	425.14	263.09	-	-	424.137	C20H24O10	[M+H]+	Rutarin	Rutarin	Lignans and Coumarins	木脂素和香豆素	Coumarins	香豆素	20320-81-4	3	-	10158	8930.2	3583.7	46038	71437	25547	278420	349020	139400	46270	51183	68361	28089	48791	8612.7	38664	48836	46096	71275	36514	36571	28325	37064	27617	60103	88390	53872	--	--
Lmhp008337	UPLC-MS/MS	426.26	285.24	-	-	425.254	C19H40NO7P	[M+H]+	LysoPE 14:0(2n isomer)	溶血磷脂酰乙醇胺 14:0(2n异构)	Lipids	脂质	LPE	溶血磷脂酰乙醇胺	-	3	-	28997	51654	49673	32355	19390	18328	5014.9	4723.9	3752.8	55964	103990	106860	24467	8830.2	11385	28239	28142	18522	14774	20038	4382.9	288120	210340	193750	57681	55144	69387	--	--
pmb0864	UPLC-MS/MS	426.26	285.24	-	-	425.254	C19H40NO7P	[M+H]+	LysoPE 14:0	溶血磷脂酰乙醇胺 14:0	Lipids	脂质	LPE	溶血磷脂酰乙醇胺	-	3	-	26894	49791	56196	30831	6539.6	20871	4417	6426.1	5712.2	58337	111040	98351	29288	8783	18634	30488	22580	18047	11647	17708	8138.2	261470	199260	204190	65694	61698	50451	--	--
mad1424	UPLC-MS/MS	427.05	295.05	-	-	426.043	C17H14O13	[M+H]+	Ditartaroyl-hydroxycoumarin	二酒石酰-羟基香豆素	Lignans and Coumarins	木脂素和香豆素	Coumarins	香豆素	-	3	-	1711600	1723200	1317400	673240	687260	615550	857790	853110	796580	764840	670230	753200	1922400	1478600	2022200	754430	744070	568190	1034200	855660	1108800	1128900	944040	915280	1001500	983450	1065900	--	--
Lmhn204620	UPLC-MS/MS	425.09	277.03	-	-	426.095	C22H18O9	[M-H]-	Bis(p-Coumaroyl)malic acid	二对香豆酰苹果酸	Phenolic acids	酚酸类	Phenolic acids	酚酸类	-	3	-	147250	111430	141460	9	9	9	9	9	9	9	9	9	9	9	9	9	9	9	9	9	9	9	7449.9	9	8341.8	17484	14878	--	--
Lmhn104620	UPLC-MS/MS	425.09	277.03	-	-	426.095	C22H18O9	[M-H]-	p-Coumaroylcinnamoyltartaric acid	对香豆酰肉桂酰酒石酸	Phenolic acids	酚酸类	Phenolic acids	酚酸类	-	3	-	163230	129500	117680	9	9	9	9	9	9	9	9	9	9	9	9	9	9	9	9	8758.6	9	9	7667.9	9	11360	10458	15385	--	--
pme2117	UPLC-MS/MS	426	159	-	-	427.029	C10H15N5O10P2	[M-H]-	Adenosine 5'-diphosphate	腺苷-5'-二磷酸	Nucleotides and derivatives	核苷酸及其衍生物	Nucleotides and derivatives	核苷酸及其衍生物	58-64-0	3	-	48395	53214	65243	15240	17215	9256.7	3252.8	6472.2	6960.8	13804	13306	10282	49205	48440	84486	10867	12524	17650	2494.5	6386.1	6938.1	12873	9861.8	12657	15997	19388	20505	C00008	ko00190,ko00195,ko00230,ko00908,ko01100,ko01110,ko01240
Cmbn003996	UPLC-MS/MS	429.14	193.05	-	-	430.148	C19H26O11	[M-H]-	Regaloside G	王百合苷G	Phenolic acids	酚酸类	Phenolic acids	酚酸类	120601-64-1	3	-	27608	42167	37560	20460	25156	51002	72811	33586	71438	24918	14743	43414	8202.4	13167	10149	64602	54952	21196	86535	123500	72002	65528	59386	42160	33762	49406	41734	--	--
Lmhn002574	UPLC-MS/MS	431.06	137.03	-	-	432.069	C20H16O11	[M-H]-	Caffeoyl(p-Hydroxybenzoyl)tartaric acid	咖啡酰对羟基苯甲酰酒石酸	Phenolic acids	酚酸类	Phenolic acids	酚酸类	-	3	-	9	7371.8	9	10283	22106	6319.8	27565	32997	9	4263	55624	6298.8	2812	9	9	5650.2	21824	12794	50586	31184	32906	52488	44226	49864	20976	14697	17077	--	--
MWSHY0181	UPLC-MS/MS	433.11	313.07	-	-	432.106	C21H20O10	[M+H]+	Apigenin-8-C-Glucoside (Vitexin)	芹菜素-8-C-葡萄糖苷 (牡荆素)	Flavonoids	黄酮	Flavones	黄酮	3681-93-4	3	-	9	9	9	344870	389620	235630	613830	494970	142140	165210	291370	82141	9	45389	9	539810	1139600	1122600	1204100	1206800	2130400	173470	192070	237320	413900	473330	430120	C01460	ko00941,ko00944
MWSHY0008	UPLC-MS/MS	433.11	283.06	-	-	432.106	C21H20O10	[M+H]+	Isovitexin	异维新	Flavonoids	黄酮	Flavones	黄酮	38953-85-4	3	-	9	9	9	377590	431520	216780	634460	764980	318210	224770	352720	83585	9	38157	9	694270	1334100	1509500	1501400	1499600	2797000	154250	286890	260540	470360	578410	601830	--	--
pme0321	UPLC-MS/MS	431.1	285	-	-	432.106	C21H20O10	[M-H]-	Kaempferol-7-O-rhamnoside	山奈酚-7-O-鼠李糖苷	Flavonoids	黄酮	Flavonols	黄酮醇	20196-89-8	1	-	58033	142510	267610	12414000	8523100	6830300	11114000	11826000	5464800	12233000	10887000	4191400	32213	9	9	35563	18094	9	9	9	9	9	63436	9	4737800	6157700	6659400	--	--
pmp000413	UPLC-MS/MS	433.11	283.06	-	-	432.106	C21H20O10	[M+H]+	Genistein-8-C-glucoside	染料木素-8-C-葡萄糖苷	Flavonoids	黄酮	Isoflavones	异黄酮	66026-80-0	3	-	9	9	2730.2	502930	483170	304200	633770	1030500	330910	316480	380500	94552	7203.2	93909	9	861950	1626500	1680500	1728100	1436200	2976500	194260	335880	360260	571340	566200	681880	C10420	--
mws0919	UPLC-MS/MS	431.1	285	-	-	432.106	C21H20O10	[M-H]-	Kaempferol-3-O-rhamnoside (Afzelin)(Kaempferin)	山奈酚-3-O-鼠李糖苷 (阿福豆苷)(番泻叶山奈苷)	Flavonoids	黄酮	Flavonols	黄酮醇	482-39-3	1	-	52375	115320	303750	2662800	5380400	2149400	6522900	6751900	8792000	46343000	33456000	45900000	55633	325750	75112	46640	29619	156360	96603	55984	114680	59735000	68071000	67853000	28449000	31904000	32213000	C16911	ko00944
Lmfn004036	UPLC-MS/MS	433.08	300.03	-	-	434.085	C20H18O11	[M-H]-	Morin-3-O-lyxoside	桑色素-3-O-来苏糖苷	Flavonoids	黄酮	Flavonols	黄酮醇	-	1	-	22888	32580	88881	9033700	7263100	8359600	30830000	38417000	23996000	17909000	30405000	28214000	37248	22006	4273.5	492720	1160400	1193200	1406300	2173900	1506400	1303500	3807700	1918500	10483000	10441000	13182000	--	--
mws4183	UPLC-MS/MS	433.08	300.03	-	-	434.085	C20H18O11	[M-H]-	Quercetin-3-O-arabinoside (Guaijaverin)	槲皮素-3-O-阿拉伯糖苷(番石榴苷)	Flavonoids	黄酮	Flavonols	黄酮醇	22255-13-6	1	-	17909	20829	90460	7235000	6360600	8012600	23652000	35297000	27355000	19934000	37358000	27791000	21075	16484	5731.2	148130	401800	323490	223740	725650	446620	864270	1904900	1090400	9599300	8436900	10537000	--	--
Lmfn004065	UPLC-MS/MS	433.08	300.03	-	-	434.085	C20H18O11	[M-H]-	Morin-3-O-arabinoside	桑色素-3-O-阿拉伯糖苷	Flavonoids	黄酮	Flavonols	黄酮醇	-	1	-	19453	40861	90819	7034000	6706900	8081400	18624000	35792000	26314000	21185000	34929000	28187000	24382	27342	9760.2	538920	1260200	1414300	1472900	2637900	1705100	1375500	4781400	2343700	9718500	10154000	14203000	--	--
mws2186	UPLC-MS/MS	435.09	303	-	-	434.085	C20H18O11	[M+H]+	Avicularin(Quercetin-3-O-α-L-arabinofuranoside)	扁蓄苷(广寄生苷)	Flavonoids	黄酮	Flavonols	黄酮醇	572-30-5	1	-	34920	36676	157240	15732000	22902000	13993000	45359000	69846000	45521000	60340000	79158000	46401000	54253	30794	22819	902580	2289700	2500600	3335100	4744600	4015700	3735500	10493000	6031500	24791000	25595000	28408000	--	--
HJN087	UPLC-MS/MS	433.12	271.06	-	-	434.121	C21H22O10	[M-H]-	Naringenin-4'-O-glucoside	柚皮素-4'-O-葡萄糖苷	Flavonoids	黄酮	Flavones	黄酮	-	3	-	9	9	4370.8	27915	10700	33591	27830	13109	21979	122140	119480	116790	9	6753.2	9	9355.3	19289	39755	26408	31636	16635	162600	639730	372860	62148	83173	116830	--	--
Lman003972	UPLC-MS/MS	433.11	161.03	-	-	434.121	C21H22O10	[M-H]-	6-O-Caffeoylarbutin	6-O-咖啡酰熊果苷	Phenolic acids	酚酸类	Phenolic acids	酚酸类	136172-60-6	3	-	9	142660	43603	522980	1444700	309700	436900	558390	250550	72995	125350	39822	9	32357	63331	9	76009	87300	9	9	57718	9	9	9	104600	108520	86166	--	--
mws1179	UPLC-MS/MS	433.11	271	-	-	434.121	C21H22O10	[M-H]-	Naringenin-7-O-glucoside (Prunin)	柚皮素-7-O-葡萄糖苷 (樱桃苷)	Flavonoids	黄酮	Flavanones	二氢黄酮	529-55-5	3	-	9	9	9	43048	24708	31402	386980	89185	64493	2172200	485440	336320	9	9	9	12826	21374	54152	48554	69880	55457	344970	621300	411330	238650	248560	221220	C09099	ko00941
HJN090	UPLC-MS/MS	433.11	271.06	-	-	434.121	C21H22O10	[M-H]-	Butin-7-O-glucoside	紫铆素-7-O-葡萄糖苷	Flavonoids	黄酮	Flavones	黄酮	-	3	-	9	9	9	10907	10854	22118	34516	7125.2	27573	117710	120400	72832	9	9	9	8727.2	15706	30105	30556	15176	16807	206630	594140	333150	57781	67818	98006	--	--
Lmhp008440	UPLC-MS/MS	438.26	297.24	-	-	437.254	C20H40NO7P	[M+H]+	LysoPE 15:1	溶血磷脂酰乙醇胺 15:1	Lipids	脂质	LPE	溶血磷脂酰乙醇胺	-	3	-	9209.6	37179	8886	24196	32624	20800	2129.4	1926.2	2560.6	17588	14504	23232	25743	6626	15307	43295	45276	30419	11915	15476	5346.3	107730	43484	62543	18673	13849	21979	--	--
Lmhp008885	UPLC-MS/MS	440.28	299.26	-	-	439.27	C20H42NO7P	[M+H]+	LysoPE 15:0(2n isomer)	溶血磷脂酰乙醇胺 15:0(2n异构)	Lipids	脂质	LPE	溶血磷脂酰乙醇胺	-	1	-	1276.3	12450	21757	21051	18448	26746	4657.1	3556.2	4217	13133	6235.8	3229.4	13413	2944.2	9742.2	34913	37833	19481	5950.5	8332.5	1338.9	41534	37947	18699	9025.3	6462.3	12820	--	--
Lmhp009187	UPLC-MS/MS	440.28	299.26	-	-	439.27	C20H42NO7P	[M+H]+	LysoPE 15:0	溶血磷脂酰乙醇胺 15:0	Lipids	脂质	LPE	溶血磷脂酰乙醇胺	-	2	-	166170	287500	259010	297400	191420	183230	36592	34406	21238	57778	73543	49050	326180	64273	148140	267620	234290	185400	48239	106190	37636	264470	215270	193270	127200	108990	163750	--	--
pme1014	UPLC-MS/MS	445.3	341.3	-	-	444.303	C31H40O2	[M+H]+	Menatetrenone (Vitamin K2)	四烯甲萘醌 (维生素 K2)	Others	其它类	Vitamin	维生素	11032-49-8	3	-	56662	41959	43602	93174	85562	78562	87335	114890	78136	76372	78859	51527	52259	74402	58258	78253	94499	89300	83427	97452	103170	81508	61254	88903	78821	87477	83899	--	--
Hmcp002316	UPLC-MS/MS	449.11	317.06	-	-	448.1	C21H20O11	[M+H]+	Isorhamnetin-3-O-arabinoside	异鼠李素-3-O-阿拉伯糖苷	Flavonoids	黄酮	Flavonols	黄酮醇	-	3	-	5596.9	6024	21023	112440	701310	141640	178030	1466500	116140	3886700	9591900	14075000	18112	17958	3729	923490	2828100	1708500	2162200	5113100	2943900	6251100	11853000	6201600	2158800	2164000	3072800	--	--
mws0045	UPLC-MS/MS	449.11	303.05	-	-	448.101	C21H20O11	[M+H]+	Quercetin-3-O-rhamnoside(Quercitrin)	槲皮素-3-O-鼠李糖苷(槲皮苷)	Flavonoids	黄酮	Flavonols	黄酮醇	522-12-3	3	-	9	5616.8	2986	61461	5422.4	22566	83517	137700	17617	142770	227470	23263	9	9	9	112710	109170	90349	300030	198160	240030	272760	519890	361890	130160	119120	106400	C01750	ko00944
Xmyp005654	UPLC-MS/MS	449.11	287.06	-	-	448.101	C21H20O11	[M+H]+	Kaempferol-4'-O-glucoside	山奈酚-4'-O-葡萄糖苷	Flavonoids	黄酮	Flavonols	黄酮醇	-	1	-	26469	25885	463050	2601000	3371600	1609100	5890600	20006000	10010000	28780000	33157000	12931000	55172	142800	9977.2	682610	916460	2992500	4976800	2259800	11655000	973560	9	2914000	7307100	4609500	8430000	--	--
MWSHY0136	UPLC-MS/MS	449.11	287.06	-	-	448.101	C21H20O11	[M+H]+	Kaempferol-3-O-glucoside (Astragalin)	山奈酚-3-O-葡萄糖苷(紫云英苷)	Flavonoids	黄酮	Flavonols	黄酮醇	480-10-4	1	-	26447	44663	522570	3916200	4226900	1980400	7860300	25725000	13590000	32998000	52152000	16199000	60794	196000	22794	7011200	11907000	6018400	23863000	38877000	20961000	22095000	48152000	21270000	16254000	18955000	19247000	C12249	ko00944,ko01110
mws0913	UPLC-MS/MS	447.09	285	-	-	448.101	C21H20O11	[M-H]-	Kaempferol-3-O-galactoside (Trifolin)	山奈酚-3-O-半乳糖苷(三叶豆苷)	Flavonoids	黄酮	Flavonols	黄酮醇	23627-87-4	1	-	11874	2073.4	46719	353420	327640	221910	699800	2473500	1029000	1751800	3475500	1543200	8772	18550	3104.5	155790	257000	351370	300860	212840	455320	508240	241580	495510	757200	835650	809470	C12626	ko00944
pmn001716	UPLC-MS/MS	447.09	285.04	-	-	448.101	C21H20O11	[M-H]-	Carthamone	醌式红花苷	Flavonoids	黄酮	Chalcones	查耳酮	86579-00-2	1	-	6552	9	48116	321630	194800	237280	483430	1822300	789860	1708700	2427300	1122700	9	2898	9	140410	140380	256650	251200	269960	436140	216260	110840	215570	475120	531350	555260	C08598	--
MWS20150	UPLC-MS/MS	449.11	287.07	-	-	448.101	C21H20O11	[M+H]+	Luteolin-7-O-glucoside (Cynaroside)	木犀草素-7-O-葡萄糖苷 (木犀草苷)	Flavonoids	黄酮	Flavones	黄酮	5373-11-5	1	-	2744.4	6560.3	60340	584470	2412300	475490	425590	1664800	605860	6834400	15224000	6464000	19856	75634	14566	18537	37613	88453	65569	401160	251150	289980	537930	382070	2925500	1824400	1506500	C03951	ko00944
Hmpp003270	UPLC-MS/MS	449.11	287.05	-	-	448.101	C21H20O11	[M+H]+	Luteolin-4'-O-glucoside	木犀草素-4'-O-葡萄糖苷	Flavonoids	黄酮	Flavones	黄酮	6920-38-3	1	-	37033	77824	394760	2966000	4105700	1450900	6844700	24204000	8096100	27737000	51786000	16201000	47697	200220	70334	5207500	8977800	5395300	22379000	35925000	16215000	18824000	38039000	19421000	14246000	14828000	13777000	--	--
mws0089	UPLC-MS/MS	447.09	285.04	-	-	448.101	C21H20O11	[M-H]-	Kaempferol-7-O-glucoside	山奈酚-7-O-葡萄糖苷	Flavonoids	黄酮	Flavonols	黄酮醇	16290-07-6	1	-	10098	3565.5	47452	383670	295330	256630	625340	2668100	968710	1820400	3670200	1830000	3686	29169	3615.1	178370	154160	352520	381920	381860	541240	308040	348370	492020	807540	845620	931420	--	--
mws1361	UPLC-MS/MS	449.11	151	-	-	450.116	C21H22O11	[M-H]-	Taxifolin-3-O-rhamnoside (Astilbin)	花旗松素-3-O-葡萄糖苷(落新妇苷)	Flavonoids	黄酮	Flavanonols	二氢黄酮醇	29838-67-3	3	-	9	9	9	27566	11012	14499	230690	21102	7570	2137400	75814	29765	9	9	2064	25644	21962	24136	29758	29288	7514.2	85030	175260	117170	100570	131190	152490	C17449	--
MWS20145	UPLC-MS/MS	451.12	289.07	-	-	450.116	C21H22O11	[M+H]+	Eriodictyol-7-O-glucoside	圣草酚-7-O-葡萄糖苷	Flavonoids	黄酮	Flavanones	二氢黄酮	38965-51-4	2	-	15850	13405	13342	107280	83154	40044	300790	715270	352080	1912200	1740400	375610	11861	9056.6	19885	176080	324560	128290	717680	1134200	486230	629840	1546500	551950	263190	388660	501600	--	--
HJN086	UPLC-MS/MS	449.11	287.06	-	-	450.116	C21H22O11	[M-H]-	Eriodictyol-3'-O-glucoside	圣草酚-3'-O-葡萄糖苷	Flavonoids	黄酮	Flavanones	二氢黄酮	-	2	-	9	9	9	91190	24558	11710	439050	115580	43916	3896300	89080	85356	9	9	9	211410	243510	324240	90647	242990	106030	368320	860560	307670	407330	595950	547550	--	--
Lmmn004625	UPLC-MS/MS	449.11	287.06	-	-	450.116	C21H22O11	[M-H]-	Dihydrokaempferol-7-O-glucoside	二氢山奈酚-7-O-葡萄糖苷	Flavonoids	黄酮	Flavanonols	二氢黄酮醇	-	2	-	9	9	9	53203	36003	13313	403360	117690	49276	4656600	126970	86908	4672.2	9	9	254610	301230	388630	144140	225000	112920	282030	1052800	551470	397440	582220	586770	--	--
MWSmce674	UPLC-MS/MS	451.36	89.06	-	-	450.35	C31H46O2	[M+H]+	Phylloquinone (Vitamin K1)	叶绿醌 (维生素K1)	Others	其它类	Vitamin	维生素	84-80-0	3	-	9516.6	10820	12179	7417.3	10443	9121.8	9454.1	9164.6	8362.2	11654	10164	10047	11183	6696.4	6523.3	8674.1	8424	10749	9359.2	9999.5	8828.9	7497.2	6318.7	9766.8	4425.5	9650.1	6817.2	--	--
Lmhp008763	UPLC-MS/MS	452.28	311.26	-	-	451.27	C21H42NO7P	[M+H]+	LysoPE 16:1(2n isomer)	溶血磷脂酰乙醇胺 16:1(2n异构)	Lipids	脂质	LPE	溶血磷脂酰乙醇胺	-	2	-	82657	123660	201370	7679.7	11192	10301	13677	1296.9	9245.9	63941	13645	10728	30725	4042.3	20658	2815.1	4364	10743	10900	9568.1	4019	26492	18026	22585	25531	29591	10915	--	--
pmn001415	UPLC-MS/MS	451.1	341.06	-	-	452.111	C24H20O9	[M-H]-	Catechin-(7,8-bc)-4β-(3,4-dihydroxyphenyl)-dihydro-2-(3H)-one	儿茶素-(7,8-bc)-4β-(3,4-二羟基苯基)-二氢-2-(3h)-酮	Flavonoids	黄酮	Flavanols	黄烷醇类	-	3	-	9	9	9	183290	180800	83686	354980	206380	85712	9	9	9	9	9	9	9	9	9	9	9	9	9	9	9	34312	27230	31738	--	--
pmb0876	UPLC-MS/MS	454.29	313.27	-	-	453.286	C21H44NO7P	[M+H]+	LysoPE 16:0	溶血磷脂酰乙醇胺 16:0	Lipids	脂质	LPE	溶血磷脂酰乙醇胺	53862-35-4	1	-	10161000	16970000	17515000	8771400	7799200	9165300	3767900	4123700	2270900	10278000	10314000	11807000	11727000	2379100	6238500	8713500	10896000	7463100	5532700	11014000	3404700	19812000	14152000	13006000	10041000	12678000	12191000	--	--
pmd0160	UPLC-MS/MS	454.29	313.27	-	-	453.286	C21H44NO7P	[M+H]+	LysoPE 16:0(2n isomer)	溶血磷脂酰乙醇胺 16:0(2n异构)	Lipids	脂质	LPE	溶血磷脂酰乙醇胺	-	3	-	1105300	1163000	2457700	618510	505070	799240	217030	196470	168420	575510	574680	675370	781710	93270	427050	1093000	1099100	785950	418540	807430	269510	2114500	1461800	1151700	756240	708560	837390	--	--
Lmqn012798	UPLC-MS/MS	453.34	453.34	-	-	454.345	C30H46O3	[M-H]-	Urs-12(13)-en-3-one-28-oic acid	乌苏-12(13)-烯-3-酮-28-羧酸	Terpenoids	萜类	Triterpene	三萜	-	3	-	9	9	9	9	9	9	9	9	9	9	9	9	9	9	9	9	23386	9	9	5646.4	9	9	33296	13169	1975.8	1628.3	1696.2	--	--
MWS5083	UPLC-MS/MS	455.1	96.97	-	-	456.105	C17H21N4O9P	[M-H]-	Flavin Single Nucleotide(FMN)	黄素单核苷酸(FMN)	Nucleotides and derivatives	核苷酸及其衍生物	Nucleotides and derivatives	核苷酸及其衍生物	6184-17-4	2	-	42193	54239	99854	113430	106030	147630	33246	37137	126590	137840	126830	197750	53720	26766	39544	61015	80248	97596	5102.1	65161	44809	114320	86466	111370	54155	52609	39404	C00061	ko00190,ko00740,ko01100,ko01110,ko01240
Lmdn006811	UPLC-MS/MS	455.35	455.35	-	-	456.36	C30H48O3	[M-H]-	Soyasapogenol E	大豆皂醇 E	Terpenoids	萜类	Triterpene	三萜	6750-59-0	3	-	4522.8	4861.6	3626.4	32434	32442	36991	5272.9	4915.6	5526.9	7547.9	3282.8	5850.9	9	9	9	25193	28082	45829	63036	51131	63397	75089	28272	67720	19551	25198	28091	C17420	--
mws4053	UPLC-MS/MS	455.35	455.35	-	-	456.36	C30H48O3	[M-H]-	Ursolic acid	熊果酸	Terpenoids	萜类	Triterpene	三萜	77-52-1	3	-	9	9	9	10307	43184	35834	9	3009.8	9802.8	9	1532.6	3869.7	9	9	9	34725	185410	87587	20831	246830	71783	42707	157670	95430	33619	35436	44917	C08988	--
pmn001700	UPLC-MS/MS	455.35	455.35	-	-	456.36	C30H48O3	[M-H]-	24,30-Dihydroxy-12(13)-enolupinol	24,30-二羟基-12(13)烯羽扇豆醇	Terpenoids	萜类	Triterpene	三萜	-	3	-	4372	3617.4	5319.6	34644	31975	33817	3403.3	7248	5631.5	3810.4	1472.3	5756.5	2258	729.15	1537.3	23453	10403	40290	62683	42717	37362	60776	34471	57471	19310	17226	26138	--	--
pmb0464	UPLC-MS/MS	458.1	116.3	-	-	457.143	C16H27NO14	[M+H]+	L-Aspartic acid-O-diglucoside	L-天冬氨酸-O-二葡萄糖苷	Amino acids and derivatives	氨基酸及其衍生物	Amino acids and derivatives	氨基酸及其衍生物	-	3	-	76199	36811	32306	70203	70620	27844	26602	36920	18162	449820	485340	473180	25755	35962	31696	50545	81995	96806	76492	60870	59622	895410	1797400	1768100	360170	463240	402950	--	--
mad2085	UPLC-MS/MS	457.08	295.04	-	-	458.085	C22H18O11	[M-H]-	Caffeoyl-p-coumaroyltartaric acid	咖啡酰对香豆酰酒石酸	Phenolic acids	酚酸类	Phenolic acids	酚酸类	-	3	-	10150	22354	9890.2	91602	55981	9	1375200	1182100	364860	223040	565700	170460	9	9	9	38174	11014	74428	562580	230360	1455200	56982	40482	225720	279350	247340	236020	--	--
pmb2654	UPLC-MS/MS	460.1	117.9	-	-	461.153	C19H27NO12	[M-H]-	Anthranilate-1-O-Sophoroside	邻氨基苯甲酸-1-O-槐糖苷	Phenolic acids	酚酸类	Phenolic acids	酚酸类	-	3	-	736810	310340	210670	49273	62281	144950	257810	330600	122460	882390	438650	816550	393070	92265	418710	19597	86470	138880	162190	198840	253380	368560	655140	720780	236330	311010	521460	--	--
mws4167	UPLC-MS/MS	463.09	287.06	-	-	462.08	C21H18O12	[M+H]+	Luteolin-7-O-glucuronide	木犀草素-7-O-葡萄糖醛酸苷	Flavonoids	黄酮	Flavones	黄酮	29741-10-4	1	-	7485.8	5803.5	5863.6	25079	2332.9	7871.2	31258	55354	39948	55254	13444	59716	5832	53838	23044	9750800	14609000	19014000	35903000	42922000	37382000	30487000	31726000	43322000	13927000	15399000	14586000	C03515	ko00944
Lmzn001894	UPLC-MS/MS	461.07	285.04	-	-	462.08	C21H18O12	[M-H]-	Kaempferol-3-O-glucuronide	山奈酚-3-O-葡萄糖醛酸苷	Flavonoids	黄酮	Flavonols	黄酮醇	22688-78-4	1	-	8765.2	5018	8751.8	10135	9	9261	9	9	9	9	9	9	9	25464	23236	7155100	14338000	14624000	21745000	25211000	22864000	27173000	21854000	33772000	12325000	12571000	11565000	--	--
MWSHY0035	UPLC-MS/MS	463.09	287.06	-	-	462.08	C21H18O12	[M+H]+	Scutellarein-7-O-glucuronide (Scutellarin)	野黄芩素-7-O-葡萄糖醛酸苷 (野黄芩苷)	Flavonoids	黄酮	Flavones	黄酮	27740-01-8	1	-	3314.2	5845	11991	34266	12630	7848.5	40769	61079	33284	27690	30262	9012.2	15682	62825	23856	8738800	14338000	19559000	34817000	40822000	32743000	32974000	32569000	42757000	13437000	17122000	15018000	--	--
Lmdp003171	UPLC-MS/MS	463.12	317.07	-	-	462.116	C22H22O11	[M+H]+	Azalein (Azaleatin-3-O-rhamnoside)	杜鹃黄苷	Flavonoids	黄酮	Flavonols	黄酮醇	29028-02-2	1	-	9	10591	127530	3660700	4014200	1217400	610520	13119000	1778700	6437700	16914000	8689900	9	9	9	9	9	9	9	9	9	9	9	9	4502100	3572300	3274700	--	--
pmb3012	UPLC-MS/MS	461.11	299.2	-	-	462.116	C22H22O11	[M-H]-	Chrysoeriol-7-O-glucoside	金圣草黄素-7-O-葡萄糖苷	Flavonoids	黄酮	Flavones	黄酮	19993-32-9	3	-	9	9	9	325640	1333900	139310	296780	755110	182200	290640	304350	226740	9	9	9	89542	115270	141740	9	75193	144980	9	474300	346150	196310	129130	200770	--	--
pmp000579	UPLC-MS/MS	463.12	301.07	-	-	462.116	C22H22O11	[M+H]+	Diosmetin-7-O-galactoside	香叶木素-7-O-半乳糖苷	Flavonoids	黄酮	Flavones	黄酮	-	1	-	5598.4	1398.4	7689.8	36870	124590	28986	48972	263290	59206	1229400	1644700	722990	7599.2	16670	7251.5	1407200	2256600	2780800	3075300	3003900	3818400	3374700	3138100	3417400	1201200	1473800	1442700	--	--
Lmjp003655	UPLC-MS/MS	463.12	301.08	-	-	462.116	C22H22O11	[M+H]+	6-C-MethylKaempferol-3-glucoside	6-甲基山奈酚-3-O-葡萄糖苷	Flavonoids	黄酮	Flavones	黄酮	-	1	-	5627.9	6009.7	4561.5	17511	88008	21314	40933	211070	45230	1283600	1771500	805010	5360.5	6717.1	3413.6	1369800	2576600	3280300	3415100	3672900	3132500	3142200	3207500	3720500	1401000	1250500	1399500	--	--
Hmmp004965	UPLC-MS/MS	463.12	301.07	-	-	462.116	C22H22O11	[M+H]+	Diosmetin-7-O-glucoside	香叶木素-7-O-葡萄糖苷	Flavonoids	黄酮	Flavones	黄酮	20126-59-4	1	-	6312.3	1367.6	8007.8	37913	131840	30153	41972	260670	72446	1105400	1706500	795860	4544.8	7191.8	5415.1	1329900	2479300	2645700	3216500	2890100	3263500	3063300	3602400	3577300	1212900	1326300	1472800	--	--
Hmgp002189	UPLC-MS/MS	463.13	301.07	-	-	462.118	C22H22O11	[M+H]+	Hispidulin-7-O-Glucoside	高车前素-7-O-葡萄糖苷	Flavonoids	黄酮	Flavones	黄酮	17680-84-1	1	-	6231.9	11417	2421.1	20547	132340	10105	38906	179900	46452	1311400	1651500	818460	4903.9	7567.5	3236.6	1255400	2585700	3043900	3160400	3046000	3210500	2791200	3400300	3599000	1242100	1285100	1530800	C17762	--
pmp001309	UPLC-MS/MS	465.1	303.1	-	-	464.095	C21H20O12	[M+H]+	6-Hydroxykaempferol-7-O-glucoside	6-羟基山奈酚-7-O-葡萄糖苷	Flavonoids	黄酮	Flavonols	黄酮醇	-	1	-	6091.4	3030.9	2222.3	55194	270890	98860	80724	201490	31957	348270	882400	352260	16861	9264.3	74106	32961	13982	13497	60448	24732	162550	1236700	891890	201210	171450	132790	218760	--	--
Lmdp003286	UPLC-MS/MS	465.1	303.06	-	-	464.095	C21H20O12	[M+H]+	Isohyperoside	异金丝桃苷	Flavonoids	黄酮	Flavonols	黄酮醇	35589-21-0	1	-	42428	42504	21370	590970	1508700	479480	1446100	2301200	374890	814430	2044200	479920	9669.5	110050	45248	6825700	9256400	8734000	13654000	13656000	12644000	20851000	34428000	20329000	4701400	5811900	4782300	--	--
mws0061	UPLC-MS/MS	463.09	300	-	-	464.095	C21H20O12	[M-H]-	Quercetin-3-O-galactoside (Hyperin)	槲皮素-3-O-半乳糖苷 (金丝桃苷)	Flavonoids	黄酮	Flavonols	黄酮醇	482-36-0	1	-	396030	109170	302350	15883000	23981000	12240000	37357000	54860000	12798000	19206000	43556000	19041000	230130	1202100	793340	32149000	36329000	19525000	34657000	30696000	34156000	46790000	69636000	49222000	16260000	21733000	20850000	C10073	--
Smgp004575	UPLC-MS/MS	465.1	303.05	-	-	464.095	C21H20O12	[M+H]+	Quercetin-5-O-β-D-glucoside	槲皮素-5-O-β-D-葡萄糖苷	Flavonoids	黄酮	Flavonols	黄酮醇	-	1	-	27649	88082	32880	639570	1453800	488440	1317400	2451700	386490	969120	2318600	469690	47340	73899	54213	6988400	7487500	6526900	11383000	13060000	11968000	18662000	31213000	19685000	4984000	5023900	5392500	--	--
mws1329	UPLC-MS/MS	463.09	301.03	-	-	464.095	C21H20O12	[M-H]-	Quercetin-7-O-glucoside	槲皮素-7-O-葡萄糖苷	Flavonoids	黄酮	Flavonols	黄酮醇	491-50-9	1	-	208950	54566	155730	7402100	21248000	7579000	16853000	39728000	5854500	11664000	23541000	8953400	80446	520050	442500	17965000	17613000	11724000	18443000	18395000	20264000	21944000	34389000	23949000	9555000	12301000	12133000	C12639	--
mws0091	UPLC-MS/MS	463.09	300.03	-	-	464.095	C21H20O12	[M-H]-	Quercetin-3-O-glucoside (Isoquercitrin)	槲皮素-3-O-葡萄糖苷(异槲皮苷)	Flavonoids	黄酮	Flavonols	黄酮醇	482-35-9	1	-	238910	67303	197580	11469000	20357000	8359100	24088000	42589000	8048900	14936000	35860000	9027000	131370	845030	607750	21728000	25611000	13583000	24372000	23925000	23535000	27730000	45747000	35224000	12868000	14074000	14687000	C05623	ko00944,ko01100,ko01110
Zmhn002545	UPLC-MS/MS	463.12	323.08	-	-	464.131	C22H24O11	[M-H]-	4-O-(6'-O-Glucosylcaffeoyl)-3,4-dihydroxybenzyl alcohol	4-O-(6'-O-葡萄糖基咖啡酰)-3,4-二羟基苄醇	Phenolic acids	酚酸类	Phenolic acids	酚酸类	-	3	-	9	40840	8701	278500	1230700	192060	221810	407120	117730	17141	48838	9	9	9	9	9	9	9	9	9	9	9	9	9	33565	41732	45040	--	--
pme1598	UPLC-MS/MS	463.12	301	-	-	464.132	C22H24O11	[M-H]-	Hesperetin-5-O-glucoside	橙皮素-5-O-葡萄糖苷	Flavonoids	黄酮	Flavanonols	二氢黄酮醇	69651-80-5	3	-	206460	64367	161540	8961000	16417000	6726300	22538000	36639000	7026700	11578000	24417000	9355900	78947	592850	318210	13867000	14830000	9167300	17377000	16713000	19027000	23586000	32251000	24273000	8930200	9286100	13320000	--	--
pmd0130	UPLC-MS/MS	468.31	184.07	-	-	467.301	C22H46NO7P	[M+H]+	LysoPC 14:0	溶血磷脂酰胆碱 14:0	Lipids	脂质	LPC	溶血磷脂酰胆碱	20559-16-4	2	-	343320	611330	376260	251150	258120	141740	70971	212420	39250	1241900	1654400	653160	256620	224090	157760	179230	240220	149370	179660	237320	148690	3698400	3997100	2846700	687250	751130	750090	--	--
HJAP154	UPLC-MS/MS	469.13	317.08	-	-	468.069	C23H16O11	[M+H]+	Galloylisorhamnetin	没食子酰异鼠李素	Flavonoids	黄酮	Flavonols	黄酮醇	-	3	-	9	9	9	139600	122760	161130	40523	80460	149130	251610	104780	88467	9	9	9	79910	10031	92769	17220	6646	18148	40527	10709	61338	62012	39558	69360	--	--
Hmmp002121	UPLC-MS/MS	469.12	317.08	-	-	468.113	C23H16O11	[M+H]+	Isorhamnetin-3-O-gallate	异鼠李素-3-O-没食子酸酯	Flavonoids	黄酮	Flavonols	黄酮醇	-	3	-	9	9	10029	130420	186740	202370	80688	40017	165090	274300	82519	105090	5917.2	11824	9333.8	63852	13708	79395	29088	16065	8982.5	31231	14467	80128	48802	41872	73845	--	--
Hmjn008136	UPLC-MS/MS	469.33	469.33	-	-	470.34	C30H46O4	[M-H]-	Camaldulenic acid	脱氢山楂酸	Terpenoids	萜类	Triterpene	三萜	71850-15-2	2	-	169250	66959	10744	195620	307420	58508	262180	20819	102690	34875	16951	119640	32973	28527	37872	395600	609260	693390	294950	1405700	573080	691790	471330	397390	260020	222330	248720	--	--
pmn001704	UPLC-MS/MS	469.33	423.33	-	-	470.34	C30H46O4	[M-H]-	2,3-Dihydroxy-5(6),12(13)-diene-ursolic acid	2,3-二羟基-5(6),12(13)-二烯熊果酸	Terpenoids	萜类	Triterpene	三萜	-	2	-	8780.3	1961.6	9	2971.3	6351	1460.3	9	9	3202	9	9	5782	9	9	9	13245	23012	27650	10273	45311	20713	29533	21130	15696	9789.3	9632.6	11469	--	--
Lmsn012627	UPLC-MS/MS	469.33	423.33	-	-	470.34	C30H46O4	[M-H]-	2α,3α-Dihydroxyurs-12,18-dien-28-oic acid	2α,3α-二羟基熊果-12,18-二烯-28-酸	Terpenoids	萜类	Triterpene	三萜	-	2	-	7208.5	9	9	9	3750.9	9	9	9	3571.2	9	9	7405.2	9	9	9	15517	23099	29028	12293	52661	21210	29901	19453	15734	8682.1	9262.2	9841.2	--	--
Lmmn009932	UPLC-MS/MS	469.37	469.37	-	-	470.376	C31H50O3	[M-H]-	Ambolic acid	阿波醇酸	Terpenoids	萜类	Triterpene	三萜	13878-93-8	3	-	44085	68264	85150	41990	34855	33666	23408	20666	22035	51441	37114	62796	67742	35918	36369	25140	37152	25915	31692	41881	23869	134420	108010	96780	40871	44771	41129	--	--
Zmhn002508	UPLC-MS/MS	471.15	309.1	-	-	472.158	C21H28O12	[M-H]-	4-p-Cumaroyl-rhamnosyl-(1→6)-D-glucose	4-对香豆酰鼠李糖基-(1→6)-D-葡萄糖	Phenolic acids	酚酸类	Phenolic acids	酚酸类	-	2	-	3739.6	3711.6	7860.5	68757	116780	10562	929720	778830	123150	98503	290570	41350	7239	2741.5	12057	54088	29607	115810	514810	443570	1720100	57910	32421	155070	155310	255780	218780	--	--
Lmzn006169	UPLC-MS/MS	471.35	471.35	-	-	472.355	C30H48O4	[M-H]-	Pomolic acid	坡模酸	Terpenoids	萜类	Triterpene	三萜	13849-91-7	3	-	305800	527940	437730	23306000	11327000	12608000	21585000	14470000	11873000	35949000	20578000	26392000	1066400	1703900	568650	15950000	19575000	13146000	27695000	41590000	8654100	28468000	27181000	17026000	14874000	15273000	14413000	--	--
Lmzn206284	UPLC-MS/MS	471.35	471.35	-	-	472.355	C30H48O4	[M-H]-	Terminic acid	Terminic acid	Terpenoids	萜类	Triterpene	三萜	-	3	-	426910	484010	510340	23096000	11478000	11985000	21268000	15062000	11555000	34716000	19842000	25720000	9	9	9	15674000	18756000	12958000	28320000	39329000	8691800	27438000	26979000	17015000	13396000	14881000	14805000	--	--
Hmbn005207	UPLC-MS/MS	471.35	471.35	-	-	472.355	C30H48O4	[M-H]-	hederagenin	常春藤皂苷元	Terpenoids	萜类	Triterpene Saponin	三萜皂苷	465-99-6	3	-	9	12292	9	283330	909360	279130	1897000	343080	749300	557660	1013800	508960	9	36237	9	54540	102580	207220	9	9	111190	98775	9	43323	302230	288850	263090	--	--
pmn001705	UPLC-MS/MS	471.35	471.35	-	-	472.355	C30H48O4	[M-H]-	3,24-Dihydroxy-17,21-semiacetal-12(13)oleanolic fruit	3,24-二羟基-17,21-半缩醛基-12(13)齐墩果	Terpenoids	萜类	Triterpene	三萜	-	2	-	285160	480070	473210	22822000	12066000	12708000	20741000	15028000	11634000	32917000	20651000	26183000	1106700	1673800	664540	16381000	18714000	12808000	27375000	39240000	8305400	29262000	26441000	16571000	14087000	14930000	14846000	--	--
Lmsn012425	UPLC-MS/MS	471.35	277.22	-	-	472.355	C30H48O4	[M-H]-	Rubusic acid (3β,7α-Dihydroxyolean-12-en-28-oic acid)	3β,7α-二羟基齐墩果-12-烯-28-酸	Terpenoids	萜类	Triterpene	三萜	23984-26-1	3	-	341140	580790	473270	28845000	15605000	16784000	29073000	19233000	15623000	47797000	27966000	34861000	344240	417840	366910	21241000	25053000	17654000	36663000	52536000	11344000	38958000	36307000	22625000	19204000	19573000	19942000	--	--
MWSmce560	UPLC-MS/MS	471.35	441.33	-	-	472.355	C30H48O4	[M-H]-	23-Hydroxybetulinic acid	23-羟基白桦脂酸	Terpenoids	萜类	Triterpene	三萜	85999-40-2	3	-	1765.3	11468	1371.2	3236.4	10090	1256.8	9	2133.4	9	2282.8	7815.8	5311	657.05	1802	1677.2	6961.2	6628.5	16987	6929.4	5102.3	5260.7	34716	15853	16199	9106.8	7530.2	7703.6	--	--
Smpn011792	UPLC-MS/MS	471.34	471.34	-	-	472.355	C30H48O4	[M-H]-	2,3-dihydroxy-12-ursen-28-oic acid	2,3-二羟基-12-熊果烯-28-酸	Terpenoids	萜类	Triterpene	三萜	-	3	-	21022	30255	134640	9	9	9	9	9	9	9	9	9	112600	176890	51236	28022	200820	100820	29006	572980	127730	82985	113640	101000	21366	53812	49428	--	--
Lmgp002501	UPLC-MS/MS	474.16	312.11	-	-	473.153	C20H27NO12	[M+H]+	Dhurrin-6'-O-Glucoside	蜀黍苷-6'-O-葡萄糖苷	Flavonoids	黄酮	Flavones	黄酮	-	3	-	34102	38313	30722	25999	16896	17842	35428	12592	35094	45531	8950.5	32000	12539	1948.5	11065	115800	59920	185870	266580	43866	348580	51485	21032	112260	49708	54879	65437	--	--
pmb1912	UPLC-MS/MS	474.17	327	-	-	473.166	C20H23N7O7	[M+H]+	10-Formyltetrahydrofolic Acid	10-甲酰四氢叶酸	Alkaloids	生物碱	Alkaloids	生物碱	2800-34-2	2	-	1117600	737010	776030	532650	552340	665270	125000	138840	159840	433150	375810	318550	2750600	1690700	1606900	924900	1029200	1244600	477180	185710	265640	515830	519610	494760	465460	612810	630980	C00234	ko00670,ko00970,ko01100,ko01200,ko01240
Lmhp008233	UPLC-MS/MS	474.26	333.24	-	-	473.254	C23H40NO7P	[M+H]+	LysoPE 18:4	溶血磷脂酰乙醇胺 18:4	Lipids	脂质	LPE	溶血磷脂酰乙醇胺	-	3	-	9	6018.4	10745	6216.4	5932	2843.4	8008.2	13825	10795	19878	24591	25112	9	9	9	9	9	9	6104	4284.7	8208.3	9	2422.7	3774	5607	5963.6	6978.4	--	--
mws1714	UPLC-MS/MS	473.07	149.01	-	-	474.08	C22H18O12	[M-H]-	Chicoric Acid	菊苣酸	Phenolic acids	酚酸类	Phenolic acids	酚酸类	70831-56-0	3	-	373200	246860	780740	13818	17568	56008	47302	106480	90065	9954.5	11101	27174	1646000	1716100	1666300	12935	9	9	9	9	9	9	17224	9	166400	123670	182700	C10437	--
Lmtn001569	UPLC-MS/MS	474.16	312.1	-	-	475.169	C20H29NO12	[M-H]-	2-Glucosyl-glucosyloxy-2-phenylacetic acid amide	2-葡糖基-葡萄糖-2-苯基乙酸酰胺	Alkaloids	生物碱	Alkaloids	生物碱	-	3	-	25644	24329	38359	78209	100210	72242	428080	446810	278730	38591	43383	42893	12747	10440	7586.8	51963	91243	79581	337940	464600	390960	25385	32668	38275	83208	156950	126760	--	--
Lmhp008801	UPLC-MS/MS	476.28	335.26	-	-	475.27	C23H42NO7P	[M+H]+	LysoPE 18:3	溶血磷脂酰乙醇胺 18:3	Lipids	脂质	LPE	溶血磷脂酰乙醇胺	-	1	-	9	9	9	133690	155100	97753	310590	479770	133170	218000	544960	324330	19780	9	8395.8	278530	256890	293260	956730	1056600	840640	795460	560640	585310	217110	244770	260590	--	--
Lmhp008589	UPLC-MS/MS	476.28	335.26	-	-	475.27	C23H42NO7P	[M+H]+	LysoPE 18:3(2n isomer)	溶血磷脂酰乙醇胺 18:3(2n异构)	Lipids	脂质	LPE	溶血磷脂酰乙醇胺	-	1	-	9	15201	9	131640	121060	122250	278240	479100	139400	262340	587590	371960	18026	2841.3	12669	265130	249820	344140	810000	1046800	861770	791300	560860	611760	240870	213070	252920	--	--
pmb0874	UPLC-MS/MS	478.29	337.27	-	-	477.286	C23H44NO7P	[M+H]+	LysoPE 18:2(2n isomer)	溶血磷脂酰乙醇胺 18:2(2n异构)	Lipids	脂质	LPE	溶血磷脂酰乙醇胺	-	2	-	2870000	5872600	5366800	1869600	2202800	2118000	1143600	1561400	952360	2873700	2359700	2916300	5225200	910700	2873100	2981400	2925800	3546900	4912000	4692200	3907400	8591900	5915300	6202200	2269000	2227500	2165900	--	--
pmb0881	UPLC-MS/MS	478.29	337.27	-	-	477.286	C23H44NO7P	[M+H]+	LysoPE 18:2	溶血磷脂酰乙醇胺 18:2	Lipids	脂质	LPE	溶血磷脂酰乙醇胺	-	2	-	2816900	5821800	4946700	2120400	2038700	1952900	1121500	1524200	827810	2580500	2659400	2338300	4828100	987240	3162700	3396500	3205400	3442200	4602800	4729600	3817500	7959500	6599500	5588100	1838300	2079300	3025600	--	--
Zmhn004909	UPLC-MS/MS	477.06	169.01	-	-	478.075	C21H18O13	[M-H]-	3,4-Digalloylshikimic acid	3,4-二没食子酰莽草酸	Phenolic acids	酚酸类	Phenolic acids	酚酸类	-	3	-	9	9	9	9	9	9	9	9	9	9	9	9	9	789800	9	101940	102620	172410	254210	218490	157060	263390	298260	278660	91844	100270	126240	--	--
Hmjp003123	UPLC-MS/MS	479.08	303.06	-	-	478.075	C21H18O13	[M+H]+	Quercetin-5-O-glucuronide	槲皮素-5-O-葡萄糖醛酸苷	Flavonoids	黄酮	Flavonols	黄酮醇	-	1	-	10894	3556.2	9	5237.5	9	9836.8	3518.8	9	4286.2	9	9	852.63	39230	120930	58562	9960300	10796000	15289000	1435900	15247000	18531000	2126400	2177300	1250400	5942500	6339500	6043500	--	--
Lmfn003760	UPLC-MS/MS	477.07	301.04	-	-	478.075	C21H18O13	[M-H]-	Quercetin-4'-O-glucuronide	槲皮素-4'-O-葡萄糖醛酸苷	Flavonoids	黄酮	Flavonols	黄酮醇	201463-36-7	1	-	9	9	9	9	9	9	9	9	9	9	9	9	9	47843	23354	4007700	4208500	5803000	8227200	9373000	7302000	10367000	12067000	13202000	5035800	6201000	5244400	--	--
Hmcp002207	UPLC-MS/MS	479.12	317.06	-	-	478.111	C22H22O12	[M+H]+	Isorhamnetin-7-O-glucoside (Brassicin)	异鼠李素-7-O-葡萄糖苷 (蔓菁苷)	Flavonoids	黄酮	Flavonols	黄酮醇	6743-96-0	1	-	6387	14358	35004	107210	658250	104230	78813	1586500	168950	342680	2709600	742380	273590	238700	34929	6499800	7366500	6535600	8182700	6556400	6272500	14401000	15452000	11922000	5797500	5182500	5063900	--	--
Lmjp003044	UPLC-MS/MS	479.12	317.06	-	-	478.111	C22H22O12	[M+H]+	Isorhamnetin-3-O-Glucoside	异鼠李素-3-O-葡萄糖苷	Flavonoids	黄酮	Flavonols	黄酮醇	5041-82-7	1	-	9676	19255	51891	109020	619440	75073	102530	1778500	179780	344270	2428800	1155600	296750	257600	51421	6966300	8291200	7244200	7511500	8075100	6932600	13541000	15141000	12776000	4676100	5471300	4997000	--	--
Lmjp002906	UPLC-MS/MS	479.12	317.07	-	-	478.111	C22H22O12	[M+H]+	Rhamnetin-3-O-Glucoside	鼠李素-3-O-葡萄糖苷	Flavonoids	黄酮	Flavonols	黄酮醇	27875-34-9	1	-	12554	18320	48110	114530	616590	78051	102660	1770200	165030	342010	2697900	1227700	313040	279730	34054	6851200	8044500	6695600	7983000	7624600	6796000	14729000	16513000	12719000	4710200	5275000	5192400	--	--
Hmgp002036	UPLC-MS/MS	479.12	317.06	-	-	478.112	C22H22O12	[M+H]+	Nepetin-7-O-glucoside(Nepitrin)	泽兰黄酮-7-O-葡萄糖苷(假荆芥属苷)	Flavonoids	黄酮	Flavones	黄酮	569-90-4	1	-	9	2526	27821	32189	129820	22124	15732	75225	7235.5	301210	963270	315470	30727	94329	49722	73513	73670	175750	77641	65533	124880	1344000	621950	490450	219710	127300	223660	--	--
Hmgp002148	UPLC-MS/MS	479.12	317.06	-	-	478.112	C22H22O12	[M+H]+	Nepetin-7-O-alloside	泽兰黄酮-7-O-阿洛糖苷	Flavonoids	黄酮	Flavones	黄酮	-	1	-	9	24844	59550	104690	653560	67816	77384	1696100	153530	340010	2589700	953930	275230	255800	32851	6003400	7237100	7170400	7628000	7407700	7061900	12642000	15058000	12218000	5166100	4717700	5244000	--	--
Lmnn002886	UPLC-MS/MS	477.14	179.03	-	-	478.148	C23H26O11	[M-H]-	1'-O-(3,4-Dihydroxyphenethyl)-O-caffeoyl-glucoside	1'-O-(3,4-二羟基苯乙基)-O-咖啡酰基-葡萄糖苷	Phenolic acids	酚酸类	Phenolic acids	酚酸类	-	2	-	72692	9	9	9	9	9	9	9	9	9	9	9	9	334850	258380	24513000	26503000	36585000	43721000	44089000	56655000	58399000	60777000	76672000	31021000	25981000	29941000	--	--
mws1454	UPLC-MS/MS	477.14	315	-	-	478.148	C23H26O11	[M-H]-	Persicoside	桃苷	Flavonoids	黄酮	Flavanones	二氢黄酮	28978-03-2	2	-	9	9	9	43038	72606	21452	56632	95291	45022	18725	54274	27022	9	9	39799	10385	9	9	14117	9	9	9	9	9	26537	26248	21099	--	--
Lmpp003296	UPLC-MS/MS	479.08	303.05	-	-	479.082	C21H19O13+	[M]+	Delphinidin-3-O-glucuronide	飞燕草素-3-O-葡萄糖醛酸苷	Flavonoids	黄酮	Anthocyanidins	花青素	-	2	-	18261	2539	5212.5	4422.2	876.25	9793	891.75	1673.9	1720.5	839.96	1732.5	818.72	35924	130120	57515	8099800	9746400	12260000	16536000	11858000	18494000	21381000	19715000	24835000	5319300	5139000	5648400	--	--
pmb2260	UPLC-MS/MS	480.31	184.07	-	-	479.301	C23H46NO7P	[M+H]+	LysoPC 15:1	溶血磷脂酰胆碱 15:1	Lipids	脂质	LPC	溶血磷脂酰胆碱	-	2	-	101510	176610	119380	35987	58844	50131	4888.7	26820	9821.7	37154	64838	40556	77361	31888	32740	39997	55137	34597	41110	36409	28667	203240	202760	245220	50028	75948	67609	--	--
pmb0856	UPLC-MS/MS	480.31	339.29	-	-	479.301	C23H46NO7P	[M+H]+	LysoPE 18:1(2n isomer)	溶血磷脂酰乙醇胺 18:1(2n异构)	Lipids	脂质	LPE	溶血磷脂酰乙醇胺	-	3	-	442930	989010	1368200	160590	178140	140230	29689	30854	13706	193800	148520	224670	579970	139210	456070	177160	232090	177980	149750	140970	102470	562300	478580	457410	258620	294610	279220	--	--
mws0289	UPLC-MS/MS	480.31	339.29	-	-	479.301	C23H46NO7P	[M+H]+	LysoPE 18:1	溶血磷脂酰乙醇胺 18:1	Lipids	脂质	LPE	溶血磷脂酰乙醇胺	89576-29-4	3	-	799320	1761300	1919100	338750	257520	189790	73822	62258	37247	403430	475030	421700	940760	220670	860640	291580	463830	271010	308100	247210	171550	972840	744050	700120	494700	503700	531460	--	--
Lmln001856	UPLC-MS/MS	479.09	316.02	-	-	480.091	C21H20O13	[M-H]-	5,7-Dihydroxy-4-oxo-2-(3,4,5-trihydroxyphenyl)-4H-chromen-3-yl-alloside	5,7-二羟基-4-氧代-2-(3,4,5-三羟基苯基)-4H-色烯-3-基-阿洛糖苷	Others	其它类	Others	其它	-	3	-	64384	66552	40498	9	17042	19004	9	9	9	9	9	9	29889	576830	28906	17624	12832	12708	9	9	9	9	9	9	7883.2	11457	7581	--	--
pmb2319	UPLC-MS/MS	482.32	184.07	-	-	481.317	C23H48NO7P	[M+H]+	LysoPC 15:0	溶血磷脂酰胆碱 15:0	Lipids	脂质	LPC	溶血磷脂酰胆碱	108273-89-8	2	-	2173800	4340500	3273700	2289300	2517000	1671900	653330	1188400	493830	1409700	1284400	1090200	2372300	1229800	1071100	1359100	2008900	1671100	1231200	1603300	1101000	3348100	3783800	3193600	1915600	2070200	2109100	--	--
Lmhp009129	UPLC-MS/MS	482.32	184.07	-	-	481.317	C23H48NO7P	[M+H]+	LysoPC 15:0(2n isomer)	溶血磷脂酰胆碱 15:0(2n异构)	Lipids	脂质	LPC	溶血磷脂酰胆碱	-	1	-	160920	286850	401760	181260	183000	158180	56173	59491	39677	67473	102690	37324	113240	36633	47322	128350	197530	145380	76116	118020	75041	350060	374150	226520	100860	138480	120530	--	--
pmb0883	UPLC-MS/MS	482.32	341.31	-	-	481.317	C23H48NO7P	[M+H]+	LysoPE 18:0	溶血磷脂酰乙醇胺 18:0	Lipids	脂质	LPE	溶血磷脂酰乙醇胺	69747-55-3	3	-	67650	128700	137170	45117	51594	47382	18537	18388	13388	87927	107570	74483	77037	23186	56278	90512	112280	81013	54632	77739	35228	312930	292940	210750	73745	87190	100520	--	--
pmb3066	UPLC-MS/MS	481.14	319.2	-	-	482.142	C22H26O12	[M-H]-	5-O-p-Coumaroylshikimic acid O-glucoside	5-O-对香豆酰莽草酸-O-葡萄糖苷	Phenolic acids	酚酸类	Phenolic acids	酚酸类	-	3	-	11283	4553.5	5476.6	26412	23432	42603	141050	110140	302500	21666	25814	31868	6790.1	9	9	62236	32055	86852	269590	190400	166120	35549	32123	53236	48133	39284	59623	--	--
Hmyn007081	UPLC-MS/MS	481.25	245.04	-	-	482.262	C22H43O9P	[M-H]-	LysoPG 16:1	溶血磷脂酰甘油 16:1	Lipids	脂质	Glycerol ester	甘油酯	-	3	-	4692.5	6508.8	6818	755620	1037000	1056000	3107500	4251700	3251000	711190	738350	1130000	5827.4	5016.9	4379.1	719840	668900	755020	4167000	3172700	2770400	1169200	924000	810190	1627000	1788700	1669100	--	--
Lmfn000797	UPLC-MS/MS	483.08	169.01	-	-	484.085	C20H20O14	[M-H]-	2,3-Di-O-Galloyl-D-Glucose	2,3-二-O-没食子酰-D-葡萄糖	Tannins	鞣质	Tannin	鞣质	-	3	-	15522	37011	20860	20442	9	10847	5628.7	9	4467.5	39297	37280	37940	36548	18712	19307	22489	9	9	9	9	9	21885	58395	25315	9324.8	20792	27664	--	--
Hmyn007168	UPLC-MS/MS	483.27	255.23	-	-	484.278	C22H45O9P	[M-H]-	LysoPG 16:0	溶血磷脂酰甘油 16:0	Lipids	脂质	Glycerol ester	甘油酯	-	3	-	45534	49877	42019	49733	53368	56676	72239	89188	82859	32700	41139	45407	49433	97948	95639	59673	42625	41360	88617	69825	62779	64798	57754	40119	26835	37578	32320	--	--
Lmhp010254	UPLC-MS/MS	487.23	359.15	-	-	486.225	C27H34O8	[M+H]+	Kadsuralignan J	日本南五味子木脂素 J	Lignans and Coumarins	木脂素和香豆素	Lignans	木脂素	-	2	-	9	9	9	9	9	9	9	9	9	9	9	9	22643	260740	50302	9	9	9	9	9	9	9	9	9	8607.4	11001	11274	--	--
Li512114	UPLC-MS/MS	485.36	453.34	-	-	486.371	C31H50O4	[M-H]-	Corosolic Acid Methyl Ester	科罗索酸甲酯	Terpenoids	萜类	Triterpene	三萜	4518-70-1	3	-	1277.4	840.36	622.45	6596.5	8093.2	5216.5	2334.2	679.64	1455.8	2092.5	1462.4	10081	614.01	514.45	686.72	35052	46810	74888	27482	123160	79348	99680	23728	60349	20237	20508	21806	--	--
Lmmn000214	UPLC-MS/MS	487.17	341.11	-	-	488.174	C18H32O15	[M-H]-	Solatriose	茄三糖	Others	其它类	Saccharides and Alcohols	糖及醇类	528-40-5	3	-	872290	404580	224820	195700	109930	152990	101520	109910	92603	465290	398000	1451000	702780	267600	612450	40732	44098	97143	61938	79237	94464	336810	492930	560990	206930	332370	257630	--	--
Lmmn003398	UPLC-MS/MS	489.11	285.04	-	-	490.111	C23H22O12	[M-H]-	Kaempferol-3-O-(6''-acetyl)glucoside	山奈酚-3-O-(6''-O-乙酰)葡萄糖苷	Flavonoids	黄酮	Flavonols	黄酮醇	-	1	-	16668	30339	150200	802500	289330	117920	684860	627240	557210	729620	1974700	1332500	61979	171960	17502	481390	702280	659910	1868500	2491600	756750	2537100	880260	1388400	917040	822600	1242600	--	--
pmp001142	UPLC-MS/MS	492.19	145	-	-	491.179	C24H29NO10	[M+H]+	Cimicifugamide A	升麻酰胺 A	Alkaloids	生物碱	Phenolamine	酚胺	-	3	-	52896	38460	86307	20511	31793	44484	91726	159250	192980	32946	34502	67462	158070	131910	117290	6524.7	3714	1433.9	10755	4434.1	4195	2267.3	5416.3	20782	32193	55395	54747	--	--
pma1303	UPLC-MS/MS	492.31	184.07	-	-	491.301	C24H46NO7P	[M+H]+	LysoPC 16:2	溶血磷脂酰胆碱 16:2	Lipids	脂质	LPC	溶血磷脂酰胆碱	-	3	-	20160	29777	18764	16015	24203	15680	46598	65564	29989	74977	50743	47652	34193	19642	18429	26393	21009	46609	121510	120360	134500	138060	151180	134770	39446	47494	53885	--	--
pmb0863	UPLC-MS/MS	492.31	184.07	-	-	491.301	C24H46NO7P	[M+H]+	LysoPC 16:2(2n isomer)	溶血磷脂酰胆碱 16:2(2n异构)	Lipids	脂质	LPC	溶血磷脂酰胆碱	-	3	-	24063	25210	6902.4	12122	20625	17319	38850	63218	32051	70527	56000	28945	26595	25961	17535	23817	22396	33217	106490	130950	136430	143140	134120	127710	48498	37642	50105	--	--
pmp001164	UPLC-MS/MS	493.13	316.1	-	-	492.127	C23H24O12	[M+H]+	Iristectorin B	鸢尾新苷	Flavonoids	黄酮	Isoflavones	异黄酮	94396-09-5	2	-	9	9	9	9	9	9	9	9	9	9	9	9	9	9	9	341650	451730	531030	558790	606150	536600	883950	680360	782970	335580	415420	333100	--	--
pmp001270	UPLC-MS/MS	494.32	184.07	-	-	493.317	C24H48NO7P	[M+H]+	LysoPC 16:1	溶血磷脂酰胆碱 16:1	Lipids	脂质	LPC	溶血磷脂酰胆碱	76790-27-7	1	-	551750	647190	868690	104320	231560	87900	87208	199290	63266	267150	508560	276240	311500	167390	239250	221450	113660	224220	345710	248240	406730	1675500	976890	1203400	301540	351320	392620	--	--
Lmhp008833	UPLC-MS/MS	494.32	184.07	-	-	493.317	C24H48NO7P	[M+H]+	LysoPC 16:1(2n isomer)	溶血磷脂酰胆碱 16:1(2n异构)	Lipids	脂质	LPC	溶血磷脂酰胆碱	-	1	-	475070	739480	1194200	138990	190010	136890	333360	277400	153120	445070	647590	298940	64294	62742	145480	105780	45102	113060	320830	201140	157310	778140	417270	490900	468550	535970	494460	--	--
Lmsn002937	UPLC-MS/MS	493.1	169.01	-	-	494.106	C22H22O13	[M-H]-	1-O-Caffeoyl-6-O-galloyl-β-D-glucose	1-O-咖啡酰-6-O-没食子酰-β-D-葡萄糖	Phenolic acids	酚酸类	Phenolic acids	酚酸类	-	3	-	7792.2	8589.4	104450	14790	9	9	9	9	9	9	9	9	331070	113070	178350	9	9	9	9	9	9	9	9	9	14074	26139	26015	--	--
Lmtn002997	UPLC-MS/MS	493.1	331.05	-	-	494.106	C22H22O13	[M-H]-	Mearnsetin-3-O-glucoside	3,5,7,3',5'-五羟基-4'-甲氧基黄酮-3-O-葡萄糖苷	Flavonoids	黄酮	Flavones	黄酮	-	3	-	27779	62998	25836	2697700	5750000	897040	2696600	6551900	1445100	3165700	11665000	909840	9	9	1143700	912120	261150	580570	2123400	589410	2529200	493090	93772	673140	1179500	1696700	1852900	--	--
Lmsn004321	UPLC-MS/MS	493.1	169.01	-	-	494.106	C22H22O13	[M-H]-	1-O-Caffeoyl-3-O-galloyl-β-D-glucose	1-O-咖啡酰-3-O-没食子酰-β-D-葡萄糖	Phenolic acids	酚酸类	Phenolic acids	酚酸类	-	3	-	9	9	9	9	9	9	9	9	9	9	9	9	9	9	9	9	9	29058	59552	52378	130550	9	12274	35511	42096	31516	42437	--	--
pmb0855	UPLC-MS/MS	496.34	184.07	-	-	495.332	C24H50NO7P	[M+H]+	LysoPC 16:0	溶血磷脂酰胆碱 16:0	Lipids	脂质	LPC	溶血磷脂酰胆碱	17364-16-8	1	-	6825400	12326000	9484500	5355400	6663900	4054200	3878100	7385400	2635600	7769200	7865600	6522500	7733300	7651600	6602500	5626400	9230700	6256700	8650600	10899000	8571300	17534000	21415000	15740000	11032000	11335000	10877000	--	--
pmd0132	UPLC-MS/MS	496.34	184.07	-	-	495.332	C24H50NO7P	[M+H]+	LysoPC 16:0(2n isomer)	溶血磷脂酰胆碱 16:0(2n异构)	Lipids	脂质	LPC	溶血磷脂酰胆碱	-	1	-	2423900	2856700	5678900	1292500	1816000	1693200	865080	1232000	746910	1841600	1843800	1663700	1545300	675060	1028100	2020800	2681000	2115700	1976500	2600700	2125600	5856700	6797500	4666700	2225500	2352900	2667500	--	--
Lmgp003989	UPLC-MS/MS	499.13	163.04	-	-	498.116	C25H22O11	[M+H]+	Dicaffeoylshikimic acid	二咖啡酰基莽草酸	Phenolic acids	酚酸类	Phenolic acids	酚酸类	-	1	-	10509000	21852000	11505000	25962000	49093000	9664100	13022000	22849000	6375800	33822000	19524000	12975000	972440	264520	3789200	3220300	3987000	7807600	11712000	2445300	21899000	19528000	34199000	21451000	14842000	17744000	13485000	--	--
pmn001642	UPLC-MS/MS	503.08	459.1	-	-	504.09	C23H20O13	[M-H]-	Kaempferol-3-O-(2''-O-acetyl)glucuronide	山奈酚-3-O-(2''-O-乙酰)葡萄糖醛酸苷	Flavonoids	黄酮	Flavonols	黄酮醇	-	3	-	43293	53011	50738	3036400	1025500	2316800	3719700	2582800	3612900	2784300	1278000	1256500	50024	16170	69070	142220	113520	324800	2291100	3015300	1819700	784360	499800	854030	1151200	1681800	1414000	--	--
pmb3000	UPLC-MS/MS	503.12	341.1	-	-	504.127	C24H24O12	[M-H]-	Chrysoeriol-7-O-(6''-acetyl)glucoside	金圣草黄素-7-O-(6''-乙酰)葡萄糖苷	Flavonoids	黄酮	Flavones	黄酮	-	3	-	4237.5	5222	979.04	148380	132540	29087	91442	63654	69506	125650	44415	35220	594.59	1324.4	3109.8	226790	207310	93841	221410	167250	114860	316160	177080	228900	172790	125530	155380	--	--
Lmsn002288	UPLC-MS/MS	503.14	341.09	-	-	504.148	C21H28O14	[M-H]-	1-O-Caffeoyl-(6-O-glucosyl)-β-D-glucose	1-O-咖啡酰-6-O-葡萄糖基-β-D-葡萄糖	Phenolic acids	酚酸类	Phenolic acids	酚酸类	-	1	-	254190	298840	447270	2762900	2956100	3653600	3653600	4150200	6777300	6380200	8863900	7097500	217700	112980	109810	834920	1113100	1085600	1256500	1475800	948550	4112300	3877700	3201300	2714400	2665200	2702700	--	--
pme2125	UPLC-MS/MS	503.16	179	-	-	504.169	C18H32O16	[M-H]-	Raffinose	棉子糖	Others	其它类	Saccharides and Alcohols	糖及醇类	512-69-6	3	-	137000	222370	132980	24652	8732.3	50536	29591	21428	17885	128220	135020	36619	232860	322240	432870	32781	25381	62102	37610	29156	48731	95259	115240	132420	111090	96721	59939	C00492	ko00052,ko01100,ko02010
mws1589	UPLC-MS/MS	503.16	179	-	-	504.169	C18H32O16	[M-H]-	D-Panose	D-潘糖	Others	其它类	Saccharides and Alcohols	糖及醇类	33401-87-5	3	-	52918	34619	65013	1498.7	3026.7	17400	17074	7140.6	2329.2	47483	35778	26665	77350	104800	143020	11773	8741.9	17874	13350	4903.9	5322.9	40451	21772	49838	20502	27844	20953	C00713	--
Hmjp003546	UPLC-MS/MS	505.35	469.33	-	-	504.346	C30H48O6	[M+H]+	Madecassic acid	羟基积雪草酸	Terpenoids	萜类	Triterpene	三萜	18449-41-7	2	-	9	101450	9	9	9	9	9	9	9	9	9	9	32612	27460	533710	9	9	9	9	9	9	9	9	9	46147	43806	42542	--	--
pmp001141	UPLC-MS/MS	506.2	145	-	-	505.195	C25H31NO10	[M+H]+	Cimicifugamide	升麻酰胺	Alkaloids	生物碱	Phenolamine	酚胺	-	3	-	4281.5	6406.8	1240.4	44540	2418.6	10986	112470	17231	24426	60148	15076	39064	25581	72481	18727	176130	136630	140150	454890	425880	438050	197350	137520	120370	96339	99216	113720	--	--
Lmhp008718	UPLC-MS/MS	506.32	184.07	-	-	505.317	C25H48NO7P	[M+H]+	LysoPC 17:2	溶血磷脂酰胆碱 17:2	Lipids	脂质	LPC	溶血磷脂酰胆碱	-	1	-	90164	198630	95792	33056	58761	43738	81324	117410	49412	123170	123710	53258	82071	38945	48878	45009	30953	70699	162890	121660	146900	349170	371800	360650	78536	102620	119790	--	--
Lmhp010514	UPLC-MS/MS	506.32	365.31	-	-	505.317	C25H48NO7P	[M+H]+	LysoPE 20:2(2n isomer)	溶血磷脂酰乙醇胺 20:2(2n异构)	Lipids	脂质	LPE	溶血磷脂酰乙醇胺	-	1	-	55661	72581	148060	42527	39354	35286	14196	23574	14075	131650	123040	106590	85926	21008	48745	30625	34826	49513	35833	44628	35117	368490	308760	216560	79152	89825	83775	--	--
Lmhp010757	UPLC-MS/MS	506.32	365.31	-	-	505.317	C25H48NO7P	[M+H]+	LysoPE 20:2	溶血磷脂酰乙醇胺 20:2	Lipids	脂质	LPE	溶血磷脂酰乙醇胺	-	1	-	64287	69002	175800	34473	36947	35617	14514	24885	14640	135240	136610	103390	74845	18297	52065	38276	37503	55555	30996	49347	38197	358770	322480	233200	80785	84925	99221	--	--
Hmln002199	UPLC-MS/MS	505.1	300.03	-	-	506.107	C23H22O13	[M-H]-	Quercetin-3-O-(6''-O-acetyl)galactoside	槲皮素-3-O-(6''-O-乙酰)半乳糖苷	Flavonoids	黄酮	Flavonols	黄酮醇	-	1	-	168120	43395	133940	3849100	4160500	946530	5462600	5644200	1404500	2361200	2632700	1280300	10508	37780	15274	4661900	4966000	11884000	10786000	7970600	13919000	14642000	12040000	12190000	5769100	8905800	7499300	--	--
Lmhp009590	UPLC-MS/MS	508.34	184.07	-	-	507.332	C25H50NO7P	[M+H]+	LysoPC 17:1	溶血磷脂酰胆碱 17:1	Lipids	脂质	LPC	溶血磷脂酰胆碱	-	1	-	24822	61654	55008	18010	35387	24432	43013	56980	25112	91585	77927	44357	87026	35063	36112	30970	37803	61762	200770	139240	177100	175860	167330	91716	67833	64262	68668	--	--
pmb2406	UPLC-MS/MS	510.36	184.07	-	-	509.348	C25H52NO7P	[M+H]+	LysoPC 17:0	溶血磷脂酰胆碱 17:0	Lipids	脂质	LPC	溶血磷脂酰胆碱	50930-23-9	2	-	45194	86574	115710	37287	60094	43172	15947	22290	14895	84686	81168	55637	18386	10041	21413	71523	69461	59400	38606	53684	37990	333610	348790	203730	75136	103290	106070	--	--
Lmhp010515	UPLC-MS/MS	510.36	184.07	-	-	509.348	C25H52NO7P	[M+H]+	LysoPC 17:0(2n isomer)	溶血磷脂酰胆碱 17:0(2n异构)	Lipids	脂质	LPC	溶血磷脂酰胆碱	-	2	-	44148	92967	91041	49632	73641	56868	27716	29692	20499	83648	96055	65118	26151	19581	22101	90846	119600	89958	49144	59291	59653	346000	445510	210170	88849	113550	107440	--	--
Lmhp009773	UPLC-MS/MS	515.32	261.22	-	-	514.314	C27H46O9	[M+H]+	1-α-Linolenoyl-glycerol-3-O-glucoside	1-α-亚麻酸甘油酯-3-O-葡萄糖苷	Lipids	脂质	Glycerol ester	甘油酯	-	1	-	8258.1	3642.2	5567.2	44302	47993	66747	64243	69180	47405	45213	43142	22361	9	2065.6	9	78233	34782	55101	340870	235400	238790	58969	44299	47648	72022	52376	66275	--	--
Hmqp006235	UPLC-MS/MS	516.3	184.07	-	-	515.297	C26H46NO7P	[M+H]+	LysoPC 18:4	溶血磷脂酰胆碱 18:4	Lipids	脂质	LPC	溶血磷脂酰胆碱	-	1	-	84427	187470	284480	36135	115340	47621	75095	133640	47766	74703	38420	43252	18539	11265	20582	23823	23083	68966	249030	60755	352150	87753	24537	53410	51227	80842	58961	--	--
MWSmce346	UPLC-MS/MS	517.13	163.04	-	-	516.127	C25H24O12	[M+H]+	1,3-O-Dicaffeoylquinic Acid (Cynarin)	1,3-O-双咖啡酰奎宁酸(洋蓟酸)	Phenolic acids	酚酸类	Phenolic acids	酚酸类	30964-13-7	1	-	30960000	47510000	22938000	37274000	87253000	22029000	32961000	35108000	29553000	58307000	53541000	20945000	2129600	840560	9076600	11402000	8845800	12134000	19243000	5993900	41645000	32161000	59589000	39801000	27968000	36249000	35580000	C10445	--
MWSmce328	UPLC-MS/MS	517.13	163.04	-	-	516.127	C25H24O12	[M+H]+	Isochlorogenic acid C	异绿原酸 C	Phenolic acids	酚酸类	Phenolic acids	酚酸类	57378-72-0	1	-	31272000	46885000	23725000	39134000	82961000	21640000	28842000	34418000	25835000	60494000	54284000	22022000	2067400	809350	8922200	11388000	9472100	11472000	21706000	5899700	38737000	33268000	59833000	41427000	27876000	34978000	37273000	--	--
Li512115	UPLC-MS/MS	515.12	353.09	-	-	516.127	C25H24O12	[M-H]-	Isochlorogenic acid B	异绿原酸 B	Phenolic acids	酚酸类	Phenolic acids	酚酸类	14534-61-3	1	-	1228600	3298000	1058000	2977000	6358700	1850400	3321200	4043500	3232400	7906500	6255900	2109000	94454	17802	385340	830030	557370	610890	2796100	499560	4200700	3615200	6856400	4294700	2831500	3315300	3124400	C10468	--
pmn001382	UPLC-MS/MS	515.12	353.09	-	-	516.127	C25H24O12	[M-H]-	Isochlorogenic acid A	异绿原酸 A	Phenolic acids	酚酸类	Phenolic acids	酚酸类	2450-53-5	2	-	1493800	3342400	1249300	2587300	8484100	1756100	3121200	4590000	3131100	7391200	7445200	2587800	94643	28781	518790	946180	528610	854760	1873100	496400	4888100	3996900	5955900	3840100	2118400	3079500	2835400	--	--
Lmhp010334	UPLC-MS/MS	517.34	263.24	-	-	516.33	C27H48O9	[M+H]+	2-Linoleoylglycerol-1-O-glucoside	2-亚油酰甘油酯-1-O-葡萄糖苷	Lipids	脂质	Glycerol ester	甘油酯	-	2	-	33609	37641	19449	7530.9	23517	32857	9175.6	21841	28082	19570	11614	18370	4930.4	7654	9378.8	2936.2	4526.5	14847	28948	6470.2	43105	20657	14759	23500	12569	10882	16704	--	--
Lmhp010573	UPLC-MS/MS	517.34	263.24	-	-	516.33	C27H48O9	[M+H]+	1-Linoleoylglycerol-3-O-glucoside	1-亚油酰甘油酯-3-O-葡萄糖苷	Lipids	脂质	Glycerol ester	甘油酯	-	2	-	7758.6	19305	19336	2180	3438.1	8306.2	2941.2	2230.9	5369	5309.4	6427.3	8333.3	6333.9	2022.7	4527.4	4039	4907.8	5175.3	16793	14289	39746	17341	6008.5	12075	4585.6	7236.1	6019.7	--	--
pmb0865	UPLC-MS/MS	518.32	184.07	-	-	517.317	C26H48NO7P	[M+H]+	LysoPC 18:3(2n isomer)	溶血磷脂酰胆碱 18:3(2n异构)	Lipids	脂质	LPC	溶血磷脂酰胆碱	-	1	-	234310	248430	119800	784260	1812200	852510	2660500	8534900	1391600	4870700	5951900	2713900	91558	34301	93941	2386000	1947200	2905400	11201000	9675900	12456000	12156000	10752000	11536000	4200800	4450900	4465400	--	--
pmb0854	UPLC-MS/MS	518.32	184.07	-	-	517.317	C26H48NO7P	[M+H]+	LysoPC 18:3	溶血磷脂酰胆碱 18:3	Lipids	脂质	LPC	溶血磷脂酰胆碱	-	1	-	259740	427730	252710	1108100	1907800	766970	3584800	7950000	1423900	3863700	5223100	2849300	145580	20713	73582	1980400	1807400	2925900	10947000	9585300	12606000	12161000	9964800	11079000	3348300	3973300	4197500	--	--
pmp000531	UPLC-MS/MS	519.19	357.13	-	-	518.179	C26H30O11	[M+H]+	Phellamurin	黄柏苷	Flavonoids	黄酮	Flavanonols	二氢黄酮醇	52589-11-4	2	-	876020	365610	878030	2264500	1004400	1735700	246940	236740	230230	139570	52514	328440	81323	105620	69164	253900	752180	188560	56462	123760	61602	40204	76391	53236	298670	293670	360790	C09808	--
Smhp002357	UPLC-MS/MS	519.18	339.12	-	-	518.179	C26H30O11	[M+H]+	tortoside f	tortoside f	Lignans and Coumarins	木脂素和香豆素	Lignans	木脂素	-	2	-	377240	239870	411980	1208300	411800	943230	128240	126380	123880	70547	38676	148920	37034	51492	30911	136140	300320	93315	106040	143470	100710	20402	49370	28348	122020	170320	178790	--	--
pmp001251	UPLC-MS/MS	520.34	184.07	-	-	519.332	C26H50NO7P	[M+H]+	LysoPC 18:2(2n isomer)	溶血磷脂酰胆碱 18:2(2n异构)	Lipids	脂质	LPC	溶血磷脂酰胆碱	-	1	-	48001000	79621000	69250000	25316000	33542000	24668000	31878000	45209000	25802000	38493000	45605000	35600000	24357000	22015000	17876000	14957000	15252000	21853000	33454000	30045000	42935000	58443000	60093000	55575000	47179000	48070000	51627000	--	--
pmp001273	UPLC-MS/MS	520.34	184.07	-	-	519.332	C26H50NO7P	[M+H]+	LysoPC 18:2	溶血磷脂酰胆碱 18:2	Lipids	脂质	LPC	溶血磷脂酰胆碱	-	1	-	5909500	4713800	5132200	1718500	2482200	1925900	2128900	3697200	2150100	4117800	3807900	2338300	4749800	3078100	5492600	2359100	2719100	4150800	6341600	5990000	7961800	10872000	7424700	7861000	4746100	3545500	4044700	--	--
pmn001644	UPLC-MS/MS	519.08	300	-	-	520.085	C23H20O14	[M-H]-	Quercetin-3-O-(2''-acetyl)glucuronide	槲皮素-3-O-(2''-乙酰)葡萄糖醛酸苷	Flavonoids	黄酮	Flavonols	黄酮醇	-	3	-	9	47520	153910	181580	303360	78640	133110	280560	143720	276100	527230	190220	558190	1895100	203520	765300	832640	1249400	382240	602050	954350	3128300	3568000	3211700	879670	901680	889900	--	--
Li512111	UPLC-MS/MS	519.11	315.05	-	-	520.122	C24H24O13	[M-H]-	Isorhamnetin-3-O-(6''-acetylglucoside)	异鼠李素-3-O-(6''-乙酰)葡萄糖苷	Flavonoids	黄酮	Flavonols	黄酮醇	-	2	-	100970	206280	869520	456520	1863100	291980	310560	790150	459030	819240	2673700	1761300	8466000	10668000	1443300	2187700	3061200	12036000	2874400	4056500	2847300	18689000	13684000	13473000	3619200	4574100	4991300	--	--
pmp000682	UPLC-MS/MS	538.22	359.14	-	-	520.168	C26H32O11	[M+NH4]+	Matairesinol-4'-O-glucoside (Matairesinoside)	罗汉松脂酚-4'-O-葡萄糖苷 (罗汉松树脂酚苷)	Lignans and Coumarins	木脂素和香豆素	Lignans	木脂素	23202-85-9	1	-	370840	934080	590670	2216400	6990900	1390500	2529300	50998000	9494000	5125800	87305000	11959000	866290	478340	553890	6797500	498500	10887000	2247600	464200	3260900	380720	178620	275650	15301000	15541000	17749000	--	--
Zmcp102703	UPLC-MS/MS	521.2	131.05	-	-	520.194	C26H32O11	[M+H]+	saikolignanoside D	柴胡木脂素苷D	Lignans and Coumarins	木脂素和香豆素	Lignans	木脂素	-	1	-	11082000	6416300	6261900	7897400	11269000	6608500	9262100	16332000	11060000	9123600	13182000	4711500	1824900	1550700	1886900	6745900	4223100	13300000	12131000	8437200	5783800	9818000	9898400	9114100	5937400	8063800	7691000	--	--
Cmsp003083	UPLC-MS/MS	521.2	131.05	-	-	520.194	C26H32O11	[M+H]+	Dehydrodiconiferyl alcohol-4-O-glucoside	脱氢二十二烷醇-4-O-葡萄糖苷	Others	其它类	Others	其它	107870-88-2	1	-	9787600	6766800	7076800	7588200	11888000	6402700	8552700	16491000	11974000	9844600	12267000	5482400	1765200	1320400	1978300	6722400	4390300	13695000	11524000	8722900	6708400	10285000	10069000	8974400	6919000	8438600	8131800	--	--
Lmsp003655	UPLC-MS/MS	521.2	131.05	-	-	520.194	C26H32O11	[M+H]+	Dehydrodiconiferyl alcohol-gamma'-O-glucoside	脱氢二松柏醇-γ'-O-葡萄糖苷	Phenolic acids	酚酸类	Phenolic acids	酚酸类	-	1	-	9803400	6258500	6940200	7712200	11868000	6457900	9988100	16427000	12024000	9133100	11470000	5096300	1998900	1657700	1914100	6818400	4324700	15405000	10594000	8291100	6871200	12078000	9447900	9941900	6940400	8001800	7968300	--	--
pmn001378	UPLC-MS/MS	519.19	357.14	-	-	520.194	C26H32O11	[M-H]-	Pinoresinol-4-O-glucoside	松脂醇-4-O-葡萄糖苷	Lignans and Coumarins	木脂素和香豆素	Lignans	木脂素	41607-20-9	1	-	27991	48032	26796	780140	643130	717420	3174100	2609600	2450600	12689000	8446100	5988700	28794	23828	98756	228960	99759	703770	963480	217690	519430	4354800	3933000	3533700	3130600	3778800	3525200	C17529	--
Lmhp010190	UPLC-MS/MS	522.36	184.07	-	-	521.348	C26H52NO7P	[M+H]+	LysoPC 18:1(2n isomer)	溶血磷脂酰胆碱 18:1(2n异构)	Lipids	脂质	LPC	溶血磷脂酰胆碱	-	1	-	6836100	19588000	13770000	4669900	5479400	3158800	4322400	4151300	3498800	9777800	14720000	6205300	18188000	32925000	12277000	2953900	7257400	3569800	10616000	9850700	7988900	14856000	17961000	13977000	11992000	12889000	13528000	--	--
pmp001281	UPLC-MS/MS	522.36	184.07	-	-	521.348	C26H52NO7P	[M+H]+	LysoPC 18:1	溶血磷脂酰胆碱 18:1	Lipids	脂质	LPC	溶血磷脂酰胆碱	-	2	-	6091900	12021000	13021000	1351600	2389300	971680	811520	997840	405220	3727500	3987800	3306900	12349000	9307500	12330000	2070200	3036200	3180200	5179400	4634900	5272400	9899000	9717100	10319000	3873000	5228300	4617500	--	--
pmb3041	UPLC-MS/MS	521.09	329.2	-	-	522.101	C23H22O14	[M-H]-	Tricin-7-O-saccharic acid	苜蓿素-7-O-葡萄糖二酸苷	Flavonoids	黄酮	Flavones	黄酮	-	3	-	94819	86218	118170	921550	1032300	372460	1071300	1779800	947550	1421100	2545100	1688800	308620	80403	74032	619670	207490	405450	822920	241920	459360	306020	530300	207730	398990	607220	597460	--	--
pmn001710	UPLC-MS/MS	521.13	359.08	-	-	522.137	C24H26O13	[M-H]-	Rosmarinic acid-3'-O-glucoside	迷迭香酸-3'-O-葡萄糖苷	Phenolic acids	酚酸类	Phenolic acids	酚酸类	910028-78-3	3	-	174820	101660	76328	433570	375550	183030	859120	715460	375530	346960	473110	473930	52895	55978	58103	116020	89272	304720	89250	169120	139340	66522	115360	115750	254940	238500	198410	--	--
Jmzn003632	UPLC-MS/MS	521.2	329.14	-	-	522.21	C26H34O11	[M-H]-	Manglieside D	Manglieside D	Lignans and Coumarins	木脂素和香豆素	Lignans	木脂素	-	1	-	200680	67645	142540	1031400	1168000	500910	1224800	2350200	1156000	1543400	2835900	1745600	299680	78075	79345	797430	243650	433050	897570	290980	725430	342370	571860	328360	501260	721600	634820	--	--
Cmsp005051	UPLC-MS/MS	523.23	137.06	-	-	522.21	C26H34O11	[M+H]+	Isolariciresinol-9-O-glucoside	异落叶松脂素-9-O-葡萄糖苷	Lignans and Coumarins	木脂素和香豆素	Lignans	木脂素	-	3	-	304470	343020	398690	159390	523620	338800	109120	309220	345840	62728	43406	23989	94349	119170	116220	309160	109960	254890	156540	75239	207840	71771	23415	32124	141790	128700	146100	--	--
Hmln003754	UPLC-MS/MS	521.2	359.15	-	-	522.21	C26H34O11	[M-H]-	Icariside E5	淫羊藿次苷 E5	Others	其它类	Others	其它	126176-79-2	2	-	10913	115850	92660	281910	906260	523090	271430	1948400	1085200	304940	4255000	462870	16189	2290.2	766160	382630	46983	599230	606110	105710	320660	68965	27200	66479	300240	387140	452640	--	--
Lmmn002274	UPLC-MS/MS	521.2	359.15	-	-	522.21	C26H34O11	[M-H]-	Isolariciresinol-9'-O-glucoside	异落叶松脂素-9'-O-葡萄糖苷	Lignans and Coumarins	木脂素和香豆素	Lignans	木脂素	63358-12-3	3	-	27932	66014	10160	201050	162550	121470	576900	682430	462120	170420	363950	374490	24005	43681	61799	266810	110350	306940	396290	205370	323420	112550	105250	120720	174890	233490	183160	--	--
Lmtn002596	UPLC-MS/MS	521.2	359.14	-	-	522.21	C26H34O11	[M-H]-	Dihydrodehydrodiconiferyl alcohol-4-O-glucoside	二氢脱氢二松柏醇-4-O-葡萄糖苷	Lignans and Coumarins	木脂素和香豆素	Lignans	木脂素	-	3	-	51058	46645	58809	164200	111370	119970	517090	730260	415510	154880	319160	408860	39586	29566	36894	222320	124520	231890	360530	118470	295450	100270	119180	88524	208680	253800	255190	--	--
Jmzn003343	UPLC-MS/MS	521.2	329.14	-	-	522.21	C26H34O11	[M-H]-	Saikolignanoside A	Saikolignanoside A	Lignans and Coumarins	木脂素和香豆素	Lignans	木脂素	-	1	-	187280	54369	46364	3822900	1929400	1819600	4920700	5867000	4808100	12146000	14944000	14554000	416100	127720	550280	1100200	287320	4380600	3491200	1179600	2360700	3272100	4332000	2749800	3939300	5761700	5970800	--	--
HJN083	UPLC-MS/MS	521.2	359.15	-	-	522.211	C26H34O11	[M-H]-	Lariciresinol-4'-O-glucoside	落叶松脂素-4'-O-葡萄糖苷	Lignans and Coumarins	木脂素和香豆素	Lignans	木脂素	143663-00-7	1	-	23597	115310	69825	357480	861810	563370	264570	1776600	1096600	247360	4568900	566590	41291	16557	992730	629480	63781	442810	409570	96901	539780	53952	25131	42618	422420	476400	500000	--	--
mws0126	UPLC-MS/MS	524.37	184.07	-	-	523.364	C26H54NO7P	[M+H]+	LysoPC 18:0	溶血磷脂酰胆碱 18:0	Lipids	脂质	LPC	溶血磷脂酰胆碱	19420-57-6	1	-	1076000	1806900	1391700	1008600	1296300	893130	503660	978690	382120	2132400	2237900	2150600	1252600	1272800	1556600	1142500	1875500	1088800	1142200	1092900	1161100	6026300	8690700	6027000	2424600	2365600	2618100	--	--
pmd0136	UPLC-MS/MS	524.37	184.07	-	-	523.364	C26H54NO7P	[M+H]+	LysoPC 18:0(2n isomer)	溶血磷脂酰胆碱 18:0(2n异构)	Lipids	脂质	LPC	溶血磷脂酰胆碱	-	2	-	75757	128600	217400	68336	86350	88955	33083	52965	34037	126410	221430	115580	84869	44458	79417	118950	165950	99005	65274	87776	77502	540970	709080	355730	151020	150710	128320	--	--
Lmtn003096	UPLC-MS/MS	523.21	361.14	-	-	524.226	C26H36O11	[M-H]-	Secoisolariciresinol 4-O-glucoside	开环异落叶松脂酚-4-O-葡萄糖苷	Lignans and Coumarins	木脂素和香豆素	Lignans	木脂素	-	2	-	628300	697740	880360	3769900	10122000	4810100	2592400	8975600	7378300	3238800	16003000	3309400	605680	232110	165210	6964500	2669200	11552000	10532000	5165800	9015800	4658500	5731300	4146400	5032400	5984700	6857800	--	--
Lmjp003822	UPLC-MS/MS	531.15	177.06	-	-	530.142	C26H26O12	[M+H]+	3,5-O-Dicaffeoylquinic Acid Methyl Ester	3,5-O-双咖啡酰奎宁酸甲酯	Phenolic acids	酚酸类	Phenolic acids	酚酸类	159934-13-1	1	-	4842500	9836300	3807600	3068800	4982800	1806900	3129600	3019000	2280200	13320000	6112100	2348700	70673	50967	469190	4753200	2339000	4644400	8742600	3399000	12863000	11952000	21957000	16025000	5327900	6767600	6768000	--	--
Zmcn005156	UPLC-MS/MS	529.13	353.08	-	-	530.142	C26H26O12	[M-H]-	4,5-O-Dicaffeoylquinic Acid Methyl Ester	4,5-二咖啡酰奎宁酸甲酯	Phenolic acids	酚酸类	Phenolic acids	酚酸类	-	2	-	1906900	4866700	1757300	2464000	4072100	1566100	4299400	2969200	2504600	11462000	3510800	1935900	31197	34152	121030	3615100	2198400	4403600	9848100	3462100	13811000	8774200	14311000	15244000	4353100	5238000	6045700	--	--
Lmjp003731	UPLC-MS/MS	531.15	177.06	-	-	530.142	C26H26O12	[M+H]+	3,4-O-Dicaffeoylquinic Acid Methyl Ester	3,4-O-双咖啡酰奎宁酸甲酯	Phenolic acids	酚酸类	Phenolic acids	酚酸类	-	2	-	4071600	7802900	4129200	2871900	5603400	1639800	3265700	2863600	2166700	14810000	6437400	2043200	75272	48479	454560	4421100	2673700	5246100	8875900	3439700	13020000	11071000	19853000	16765000	5147000	6215600	5960300	--	--
MWStz043	UPLC-MS/MS	531.15	163.04	-	-	530.142	C26H26O12	[M+H]+	3,4-Di-O-caffeoylquinic acid methyl ester	3,4-O-二咖啡酰基奎宁酸甲酯	Phenolic acids	酚酸类	Phenolic acids	酚酸类	114637-83-1	2	-	1309200	3057900	1280700	1176400	2149700	751100	1411800	1165100	1066400	6944800	2678200	949020	34607	18352	33197	1793500	1065400	2007200	3708600	1598400	5612400	4283500	8446600	7431200	2202200	2552300	2713400	--	--
Lmhn003801	UPLC-MS/MS	531.12	337.06	-	-	532.122	C25H24O13	[M-H]-	Feruloylsinapoyltartaric acid	阿魏酰芥子酰酒石酸	Phenolic acids	酚酸类	Phenolic acids	酚酸类	-	3	-	9	9	9	9	9	9	9	12444	12930	67806	51291	237200	9	9	9	51511	29186	69863	151590	9	96520	2781400	1359300	1190200	254390	243000	273310	--	--
Lmbn001181	UPLC-MS/MS	531.14	531.13	-	-	532.143	C22H28O15	[M-H]-	Fraxetin-7,8-di-O-glucoside	秦皮素-7,8-二-O-葡萄糖苷	Lignans and Coumarins	木脂素和香豆素	Coumarins	香豆素	-	3	-	27684	145680	32926	18776	31075	90165	91513	73279	305020	151330	63543	312660	89249	77030	32732	83445	88701	68442	214770	258260	94703	607260	413550	324590	106600	83878	122630	--	--
Lmhp007598	UPLC-MS/MS	534.36	184.07	-	-	533.348	C27H52NO7P	[M+H]+	LysoPC 19:2(2n isomer)	溶血磷脂酰胆碱 19:2(2n异构)	Lipids	脂质	LPC	溶血磷脂酰胆碱	-	2	-	56139	188020	152050	35264	48069	58245	81229	49903	203660	101570	56434	169390	3519.8	5616.8	3826.5	7464.3	7368	32400	15119	21977	30473	86808	38244	183110	108440	118590	95492	--	--
Lmhp007840	UPLC-MS/MS	534.36	184.07	-	-	533.348	C27H52NO7P	[M+H]+	LysoPC 19:2	溶血磷脂酰胆碱 19:2	Lipids	脂质	LPC	溶血磷脂酰胆碱	-	2	-	38839	93469	111340	16767	23832	4822.7	16462	14341	14867	9635.3	15147	4906.5	8917.8	16005	3890.9	4200	9361	4712.8	5473.4	13318	5782.6	2055.5	3699.1	12123	36111	36430	33599	--	--
Lmdp004892	UPLC-MS/MS	535.11	287.05	-	-	534.101	C24H22O14	[M+H]+	Kaempferol-3-O-(6''-malonyl)galactoside	山奈酚-3-O-(6''-丙二酰)半乳糖苷	Flavonoids	黄酮	Flavonols	黄酮醇	-	1	-	68412	144330	527340	4347800	2097300	469470	2705400	2204600	1968800	5646100	8342500	3534100	189590	417470	40453	2404000	2333100	2579400	7824000	11402000	9202900	4055100	4770200	5786200	3439300	4373000	4746400	--	--
Lmmp003817	UPLC-MS/MS	535.11	287.05	-	-	534.101	C24H22O14	[M+H]+	Kaempferol-3-O-(6''-malonyl)glucoside	山奈酚-3-O-(6''-丙二酰)葡萄糖苷	Flavonoids	黄酮	Flavonols	黄酮醇	-	2	-	54436	119970	554670	3877000	2073000	447240	2971400	1826300	1741000	6633900	10196000	3563900	208020	324970	43470	2420800	2937500	2986900	6413400	8877000	8678000	4140900	3305800	4300400	3883400	3952300	4729800	--	--
mws1642	UPLC-MS/MS	533.2	371	-	-	534.21	C27H34O11	[M-H]-	Phillyrin	连翘苷	Lignans and Coumarins	木脂素和香豆素	Lignans	木脂素	487-41-2	3	-	20608	61112	21510	103900	65892	63258	22959	34665	41471	290820	51993	53852	48391	47831	93585	96795	41336	110770	407050	67969	551130	168980	258730	860040	119560	108780	109510	C17048	--
mws0092	UPLC-MS/MS	533.2	371	-	-	534.21	C27H34O11	[M-H]-	Arctiin	牛蒡子苷	Lignans and Coumarins	木脂素和香豆素	Lignans	木脂素	20362-31-6	3	-	21086	68454	25761	49414	83442	44989	61394	55803	15186	211600	6383	66351	15562	30239	225980	61797	43297	100680	348600	103610	550170	167870	220200	780840	131040	98050	119650	C16915	--
pmb0542	UPLC-MS/MS	535.11	287.06	-	-	535.108	C24H23O14+	[M]+	Cyanidin-3-O-(6''-O-malonyl)glucoside	矢车菊素-3-O-(6''-O-丙二酰)葡萄糖苷	Flavonoids	黄酮	Anthocyanidins	花青素	171828-62-9	3	-	9	9	28832	355860	5590600	112770	113010	1118600	200900	389400	334610	9	9	17168	9	373800	334170	1728100	987920	242520	665750	398170	95298	348830	458670	478360	571320	C12643	ko00942
Lmhp010908	UPLC-MS/MS	536.37	184.07	-	-	535.364	C27H54NO7P	[M+H]+	LysoPC 19:1	溶血磷脂酰胆碱 19:1	Lipids	脂质	LPC	溶血磷脂酰胆碱	-	3	-	363310	373520	370080	8109.1	21613	15163	27969	38639	23099	37909	24186	25507	130320	82597	95528	12936	16065	12371	68186	79781	63013	28414	43133	24568	51904	46556	60193	--	--
Zmfn000481	UPLC-MS/MS	535.04	323.03	-	-	536.044	C14H22N2O16P2	[M-H]-	Uridine-5'-Diphosphate-D-Xylose	尿苷-5'-二磷酸-D-木糖	Nucleotides and derivatives	核苷酸及其衍生物	Nucleotides and derivatives	核苷酸及其衍生物	3616-06-6	1	-	206110	279120	186950	71727	70886	44720	23746	20105	13957	128210	94421	68889	165620	323170	256630	39013	79609	62187	7237.9	13651	14677	139130	192830	209910	87663	92527	93363	C00190	ko00520,ko00908,ko01100
pmn001375	UPLC-MS/MS	535.18	373.13	-	-	536.189	C26H32O12	[M-H]-	1-Hydroxypinoresinol-1-O-Glucoside	1-羟基松脂醇-1-O-葡萄糖苷	Lignans and Coumarins	木脂素和香豆素	Lignans	木脂素	81495-71-8	3	-	200180	232740	162910	108880	720620	228720	100830	204580	241380	39434	268140	202480	110690	9	9	9	9	9	9	9	9	9	9	9	52042	41423	19385	--	--
Hmln002100	UPLC-MS/MS	535.18	373.13	-	-	536.189	C26H32O12	[M-H]-	Nortrachelogenin-4-O-glucoside	去甲络石苷元-4-O-葡萄糖苷	Lignans and Coumarins	木脂素和香豆素	Lignans	木脂素	33464-78-7	3	-	302840	259050	522360	243840	1850700	751910	386830	687380	408360	173580	544620	204150	65869	20676	245770	356980	47546	340450	161760	34488	171630	36490	10997	37854	236030	323540	320840	--	--
Cmbn003318	UPLC-MS/MS	537.16	161.03	-	-	538.169	C25H30O13	[M-H]-	5-Hydroxy-10-O-(p-methoxycinnamoyl)adoxosidic acid	5-羟基-10-O-p-甲氧基肉桂酰基五福花苷酸	Terpenoids	萜类	Monoterpenoids	倍萜	-	2	-	314150	304100	392240	530470	607410	467400	2641300	2855800	997700	209000	342790	133970	240810	206790	195210	420540	320040	300030	2507400	1304700	3203800	225840	157780	255290	1015900	970460	1288400	--	--
Lmdn001925	UPLC-MS/MS	537.2	375.15	-	-	538.205	C26H34O12	[M-H]-	Olivil-4'-O-glucoside	橄榄树脂素-4'-O-葡萄糖苷	Lignans and Coumarins	木脂素和香豆素	Lignans	木脂素	76880-93-8	2	-	24678	40886	63695	156840	145850	337920	316190	653260	1154700	747510	945220	1355700	3144.5	3572.2	4990.2	124290	5697.3	238040	252150	169600	272050	102000	67738	120290	284700	273600	360700	--	--
Zmdn003480	UPLC-MS/MS	537.2	375.15	-	-	538.205	C26H34O12	[M-H]-	Cycloolivil-6-O-glucoside	环橄榄树脂素-6-O-葡萄糖苷	Lignans and Coumarins	木脂素和香豆素	Lignans	木脂素	-	2	-	10529	27610	23518	107810	168150	131880	140410	251490	119770	174420	327870	90056	59290	15514	63677	172020	67034	272920	274880	163020	290740	101730	100610	119720	90056	120080	150710	--	--
Lmhp008742	UPLC-MS/MS	542.32	184.07	-	-	541.317	C28H48NO7P	[M+H]+	LysoPC 20:5	溶血磷脂酰胆碱 20:5	Lipids	脂质	LPC	溶血磷脂酰胆碱	162440-04-2	1	-	106880	383920	216610	9	9	9	9	9	4247.2	2912.3	589730	9	63354	15954	8272.7	9	9	9	9	9	9	221010	9	44199	68046	68612	75239	--	--
pmc0960	UPLC-MS/MS	544.34	184.07	-	-	543.332	C28H50NO7P	[M+H]+	LysoPC 20:4	溶血磷脂酰胆碱 20:4	Lipids	脂质	LPC	溶血磷脂酰胆碱	-	3	-	107950	866340	683740	3790.7	5910.2	9	18392	4783.5	17329	6921.4	136290	21188	101310	19426	41891	9	9	9	9	9	4267.5	9	9	9	81478	87192	104160	--	--
pmd0146	UPLC-MS/MS	548.37	184.07	-	-	547.364	C28H54NO7P	[M+H]+	LysoPC 20:2(2n isomer)	溶血磷脂酰胆碱 20:2(2n异构)	Lipids	脂质	LPC	溶血磷脂酰胆碱	-	3	-	29390	51286	64875	17831	18161	12927	18960	26075	16034	39645	78034	30433	57106	79587	31011	8958.1	16994	20266	18591	17753	32024	106360	130680	80107	32010	33525	44206	--	--
pmd0147	UPLC-MS/MS	548.37	184.07	-	-	547.364	C28H54NO7P	[M+H]+	LysoPC 20:2	溶血磷脂酰胆碱 20:2	Lipids	脂质	LPC	溶血磷脂酰胆碱	-	3	-	404400	653000	568410	87147	169160	100860	55039	102710	34914	490650	457180	234340	705180	435090	373300	73269	87777	81019	116200	130660	122930	1453100	1696600	884640	313790	304680	372890	--	--
pmb0608	UPLC-MS/MS	549.12	301.4	-	-	548.117	C25H24O14	[M+H]+	Chrysoeriol-7-O-(6''-malonyl)glucoside	金圣草黄素-7-O-(6''-丙二酰)葡萄糖苷	Flavonoids	黄酮	Flavones	黄酮	-	2	-	215.66	9	10854	21525	28653	5943.8	7062	22738	7613.2	189390	382450	147970	3640	4569.2	3328.8	293620	432380	421060	565510	658130	666240	521250	403520	359080	231290	269870	172990	--	--
pmp000588	UPLC-MS/MS	549.12	463.12	-	-	548.117	C25H24O14	[M+H]+	Diosmetin-7-O-(6''-malonyl)glucoside	香叶木素-7-O-(6''-O-丙二酰)葡萄糖苷	Flavonoids	黄酮	Flavones	黄酮	-	3	-	9	9	9	9	9	9	9	9	9	28051	48031	9	9	9	9	21358	47406	41280	87693	77475	150710	61007	55248	71872	21519	28515	19438	--	--
pmp000980	UPLC-MS/MS	549.2	387.14	-	-	548.189	C27H32O12	[M+H]+	Maohuoside A	茂藿苷 A	Flavonoids	黄酮	Flavonols	黄酮醇	128988-55-6	2	-	17547	28773	8083.3	175750	215450	183290	369090	386290	345540	92736	90908	112330	11186	13692	11905	144990	93509	452420	973290	293410	1241600	194140	85365	358670	186320	201880	259220	--	--
Lmhp011549	UPLC-MS/MS	550.39	184.07	-	-	549.379	C28H56NO7P	[M+H]+	LysoPC 20:1	溶血磷脂酰胆碱 20:1	Lipids	脂质	LPC	溶血磷脂酰胆碱	-	3	-	7085.6	18505	17400	9896	13924	7010.8	13512	6363.6	14755	19401	11118	16201	21759	19332	15228	7622.3	10619	10214	32447	22925	26076	62552	58050	58181	19395	18394	14311	--	--
pmp000589	UPLC-MS/MS	551.1	303.05	-	-	550.096	C24H22O15	[M+H]+	Quercetin-7-O-(6''-malonyl)glucoside	槲皮素-7-O-(6''-丙二酰)葡萄糖苷	Flavonoids	黄酮	Flavonols	黄酮醇	-	1	-	468920	162190	260230	12654000	11058000	2540100	11753000	12257000	2486100	6921600	5441200	1779300	36837	146500	28270	10745000	10897000	21437000	16097000	14972000	22946000	35422000	26957000	22993000	12445000	13412000	14425000	--	--
mws1138	UPLC-MS/MS	551.15	303.04	-	-	550.143	C24H26N2O13	[M+H]+	Betanin (Betanidin-5-O-glucoside)	甜菜红苷 (甜菜苷-5-O-葡萄糖苷)	Alkaloids	生物碱	Plumerane	吲哚类生物碱	7659-95-2	3	-	520700	147340	252480	11313000	9824100	2337600	9839200	10729000	2561200	6799100	4429900	1685300	41038	119250	30872	10444000	11089000	17290000	17017000	12823000	22918000	29403000	22380000	29623000	11052000	8790300	11846000	C08540	ko00965,ko01110
Hmln002355	UPLC-MS/MS	549.2	387.15	-	-	550.204	C27H34O12	[M-H]-	5'-Methoxymatairesinoside	5'-甲氧基罗汉松脂苷	Lignans and Coumarins	木脂素和香豆素	Lignans	木脂素	1691201-82-7	2	-	54438	79338	76144	287430	51776	305880	249410	78651	571170	119220	11050	343630	62718	42251	177680	30780	8328.2	24706	18130	14738	94292	2443.9	4290.8	11129	78404	93816	61851	--	--
Lmmn002260	UPLC-MS/MS	551.21	389.17	-	-	552.221	C27H36O12	[M-H]-	5'-Methoxyisolariciresinol-9'-O-glucoside	5'-甲氧基异落叶松脂醇-9'-O-葡萄糖苷	Lignans and Coumarins	木脂素和香豆素	Lignans	木脂素	-	3	-	853650	1023600	691300	217990	242340	361540	198790	316690	558660	451510	199980	343360	943070	556640	587440	515980	267880	857360	975450	639390	643150	1065500	719850	858470	462210	479710	533430	--	--
pmn001365	UPLC-MS/MS	555.11	537.1	-	-	556.122	C27H24O13	[M-H]-	Salvianolic acid K	丹酚酸 K	Phenolic acids	酚酸类	Phenolic acids	酚酸类	203733-40-8	3	-	97194	30108	77846	8492.4	9	9	9	9	9	9	9	9	250140	198490	152570	27032	74962	27394	9	9	9	9	9	9	25418	25985	45815	--	--
Hmyn007087	UPLC-MS/MS	555.29	225	-	-	556.299	C25H49O11P	[M-H]-	LysoPI 16:0	溶血磷脂酰肌醇 16:0	Lipids	脂质	Glycerol ester	甘油酯	-	3	-	346.74	214.59	525.72	3695.5	6385.1	2621.7	21326	7404.5	19878	10932	7202.6	34373	385.76	279.4	433.61	6209.3	3777.2	6632	27297	7882.7	22124	30615	4857.6	18330	19651	15815	16089	--	--
Rfmb25702	UPLC-MS/MS	561.2	357.13	-	-	562.205	C28H34O12	[M-H]-	Pinoresinol-4-O-(6''-acetyl)glucoside	松脂醇-4-O-(6''-乙酰)葡萄糖苷	Lignans and Coumarins	木脂素和香豆素	Lignans	木脂素	-	2	-	36463	30265	29336	42672	155830	57218	105490	315690	260640	169560	215910	208920	21096	6940.2	3625.5	44615	34109	62754	364460	119490	246390	1230900	473340	406170	145020	172600	136640	--	--
HJAP064	UPLC-MS/MS	565.12	317.08	-	-	564.088	C25H24O15	[M+H]+	Isorhamnetin-3-O-(6''-malonyl)glucoside	异鼠李素-3-O-(6''-丙二酰)葡萄糖苷	Flavonoids	黄酮	Flavonols	黄酮醇	-	2	-	252240	1051200	2447700	1315800	6425600	518790	449950	1850700	542620	2016600	6409800	4810500	19524000	23541000	2941700	10709000	13237000	24171000	9109100	9369800	19548000	64354000	57498000	47234000	12499000	14166000	16844000	--	--
Zmhp005139	UPLC-MS/MS	565.12	317.07	-	-	564.112	C25H24O15	[M+H]+	Tamarixetin-3-O-(6''-malonyl)glucoside	柽柳黄素-3-O-(6''-丙二酰)葡萄糖苷	Flavonoids	黄酮	Flavonols	黄酮醇	-	2	-	237310	1055600	2908000	1537600	5506900	533380	470840	2087100	514870	1813800	5947200	5184300	19161000	24073000	3359200	10478000	12823000	23939000	9129100	9722400	15976000	58639000	57824000	46646000	13928000	16596000	13158000	--	--
Zmjp003463	UPLC-MS/MS	565.16	433.11	-	-	564.147	C26H28O14	[M+H]+	Vitexin-2''-O-xyloside	牡荆素-2''-O-木糖苷	Flavonoids	黄酮	Flavonoid carbonoside	黄酮碳糖苷	-	2	-	3592.3	20971	33546	7821700	5168700	6348700	28799000	28650000	31138000	31676000	29420000	24997000	9	17838	9	9	9366.5	9	9	9	9	6145.8	9	7491.2	10391000	12470000	14586000	--	--
Hmcp001858	UPLC-MS/MS	565.15	287.05	-	-	564.147	C26H28O14	[M+H]+	Kaempferol-3-O-arabinoside-7-O-rhamnoside	山奈酚-3-O-阿拉伯糖苷-7-O-鼠李糖苷	Flavonoids	黄酮	Flavonols	黄酮醇	-	1	-	9	9	4635.5	269800	207830	200150	1395500	1252300	1343200	1301500	1209200	1010300	9	9	9	9	9	9	9	9	9	9	9	9	467690	458660	371520	--	--
Lmnp202580	UPLC-MS/MS	565.16	433.11	-	-	564.148	C26H28O14	[M+H]+	Apigenin-8-C-(2''-xylosyl)glucoside	芹菜素-8-C-(2''-木糖基)葡萄糖苷	Flavonoids	黄酮	Flavonoid carbonoside	黄酮碳糖苷	-	2	-	24154	51226	120240	6815900	6882900	6426400	22184000	24654000	21651000	20709000	26595000	15566000	28589	9	9	9	9	9	9	9	9	9	9	9	12757000	12109000	9686500	--	--
pmp000411	UPLC-MS/MS	565.16	433.1	-	-	564.148	C26H28O14	[M+H]+	Genistein-8-C-apiosyl(1→6)glucoside	染料木素-8-C-芹糖基(1→6)葡萄糖苷	Flavonoids	黄酮	Isoflavones	异黄酮	-	2	-	4635.2	2834.7	1528.2	731690	510200	623910	3407200	1565800	3573800	3684300	2929200	2924400	3498.9	9	3641.5	2778.2	9	9	9	9	9	9	9	9	1143400	1229900	998920	--	--
Lmnp102580	UPLC-MS/MS	565.16	433.11	-	-	564.148	C26H28O14	[M+H]+	Apigenin-6-C-(2''-xylosyl)glucoside	芹菜素-6-C-(2''-木糖基)葡萄糖苷	Flavonoids	黄酮	Flavonoid carbonoside	黄酮碳糖苷	-	2	-	147100	317710	876040	30044000	30567000	25808000	74915000	69636000	65923000	63512000	70261000	54730000	156130	102710	12536	54680	36995	19010	17038	9937.8	12552	8101.2	4492	4493.8	42171000	45095000	44939000	--	--
pmb2922	UPLC-MS/MS	565.05	323.1	-	-	566.055	C15H24N2O17P2	[M-H]-	Uridine 5'-diphospho-D-glucose	尿苷 5'-二磷酸-D-葡萄糖	Nucleotides and derivatives	核苷酸及其衍生物	Nucleotides and derivatives	核苷酸及其衍生物	133-89-1	2	-	1595500	1353500	1015300	285890	415440	264060	94416	168360	74446	671530	555260	480820	820860	1191000	889190	191770	366480	288180	49302	110320	95814	418360	675740	424310	377850	426750	462100	C00029	ko00040,ko00052,ko00053,ko00240,ko00500,ko00520,ko00524,ko00561,ko00908,ko01100,ko01110,ko01240
Lmqp007331	UPLC-MS/MS	579.15	147.05	-	-	578.142	C30H26O12	[M+H]+	Kaempferol-3-O-(3''-O-p-Coumaroyl)rhamnoside	山奈酚-3-O-(3''-O-对香豆酰)鼠李糖苷	Flavonoids	黄酮	Flavonols	黄酮醇	-	1	-	30470	29776	163980	33317	13717	36546	99184	63765	99537	31870000	69555000	16620000	35158	134900	150510	41745	80267	196700	180910	196970	267190	59617000	69033000	64423000	26229000	27749000	24781000	--	--
Lmqp007185	UPLC-MS/MS	579.15	147.05	-	-	578.142	C30H26O12	[M+H]+	Kaempferol-3-O-(4''-O-p-Coumaroyl)rhamnoside	山奈酚-3-O-(4''-O-对香豆酰)鼠李糖苷	Flavonoids	黄酮	Flavonols	黄酮醇	-	1	-	32733	34799	125050	17415	14765	47875	102430	53404	99408	29637000	66127000	15179000	22628	100120	113100	26621	60310	199100	207660	207990	372820	62076000	60973000	61422000	23710000	26174000	25652000	--	--
Lmmp006709	UPLC-MS/MS	579.15	287.06	-	-	578.142	C30H26O12	[M+H]+	Kaempferol-3-O-(4''-p-coumaroyl)rhamnoside	山奈酚-3-O-(4''-对香豆酰基)鼠李糖苷	Flavonoids	黄酮	Flavonols	黄酮醇	-	1	-	9	9	9	9	9	9	9	9	9	2158700	6405300	1239400	6229.1	12256	10744	9	6227.3	14739	14447	16537	27492	5519300	10294000	6647000	1365800	1916100	1612300	--	--
MWSHY0201	UPLC-MS/MS	579.17	287.06	-	-	578.164	C27H30O14	[M+H]+	Kaempferol-3,7-O-dirhamnoside (Kaempferitrin)	山奈酚-3,7-O-二鼠李糖苷 (山奈苷)	Flavonoids	黄酮	Flavonols	黄酮醇	482-38-2	2	-	8060.8	5382.8	80592	1674300	1374300	1724500	1815900	1799900	2090600	1318900	481580	2159000	1793	896.25	894.25	896.25	9	9	9	9	9	9	9	9	774120	956050	853490	C16981	--
pme0368	UPLC-MS/MS	579.17	271.01	-	-	578.164	C27H30O14	[M+H]+	Apigenin-7-O-rutinoside (Isorhoifolin)	芹菜素-7-O-芸香糖苷 (异野漆树苷)	Flavonoids	黄酮	Flavones	黄酮	552-57-8	3	-	9	9	9	145940	111610	65301	245730	127320	101920	177500	110510	54465	9	9	9	9	9	9	9	9	9	9	9	9	45030	37718	45760	--	--
HJAP148	UPLC-MS/MS	581.15	287.06	-	-	580.142	C26H28O15	[M+H]+	Kaempferol-3-O-sambubioside	山奈酚-3-O-桑布双糖苷	Flavonoids	黄酮	Flavonols	黄酮醇	27661-51-4	3	-	28654	41491	310840	5128600	5029700	4916500	6436500	6159500	6942700	4938300	2005200	6430600	9	9	9	9	9	9	9	9	9	9	9	9	3026900	3346300	3269300	--	--
Hmcp001769	UPLC-MS/MS	581.15	303.04	-	-	580.142	C26H28O15	[M+H]+	Quercetin-3-O-rhamnosyl(1→2)arabinoside	槲皮素-3-O-鼠李糖基(1→2)阿拉伯糖苷	Flavonoids	黄酮	Flavonols	黄酮醇	-	1	-	55126	96836	270420	23971000	24769000	20131000	56197000	64567000	47349000	51854000	57233000	36577000	30155	26476	9	9	14181	9	9	9	9	9	9	9	31277000	33623000	34974000	--	--
mws1066	UPLC-MS/MS	579.17	271	-	-	580.179	C27H32O14	[M-H]-	Naringenin-7-O-Rutinoside(Narirutin)	柚皮素-7-O-芸香糖苷(芸香柚皮苷)	Flavonoids	黄酮	Flavanones	二氢黄酮	14259-46-2	3	-	9	9	9	27316	6767.5	9	187840	133560	23453	78152	9	12984	9	9	9	9	9	9	9	9	9	9	9	9	19904	17582	22732	C09793	--
mws0046	UPLC-MS/MS	579.17	271.06	-	-	580.179	C27H32O14	[M-H]-	Naringenin-7-O-Neohesperidoside(Naringin)	柚皮素-7-O-新橙皮糖苷(柚皮苷)	Flavonoids	黄酮	Flavanones	二氢黄酮	10236-47-2	3	-	9	9	9	78404	37425	15793	692370	343460	60926	161410	18549	20959	9	9	9	9	5351	9	9	9	9	13938	8142.2	8151.8	45965	51384	63746	C09789	ko00941
Lmqn001932	UPLC-MS/MS	579.21	417.16	-	-	580.216	C28H36O13	[M-H]-	Syringaresinol-4'-O-glucoside	丁香树脂酚-4'-O-葡萄糖苷	Lignans and Coumarins	木脂素和香豆素	Lignans	木脂素	7374-79-0	3	-	47549	164500	37529	526280	663270	555620	93858	98137	108920	18892	69890	114970	56149	143020	40530	546930	334430	1005300	598040	768560	829510	259400	285590	224490	340340	208800	389800	C10890	--
Hmgp003641	UPLC-MS/MS	593.18	447.13	-	-	592.177	C28H32O14	[M+H]+	Chrysoeriol-6-C-rhamnoside-7-O-rhamnoside	金圣草黄素-6-C-鼠李糖苷-7-O-鼠李糖苷	Flavonoids	黄酮	Flavones	黄酮	-	3	-	9	8977	28726	86721	80964	31785	48185	66840	14002	149800	69605	261240	14159	9	9	9	9	9	9	9	9	9	9	9	212990	191820	277740	--	--
Rfmb056	UPLC-MS/MS	591.21	387.14	-	-	592.216	C29H36O13	[M-H]-	medioresinol-4'-O-(6'''-acetyl)glucoside	杜仲树脂酚-4'-O-(6'''-乙酰)葡萄糖苷	Lignans and Coumarins	木脂素和香豆素	Lignans	木脂素	-	3	-	125060	134280	52260	560310	565140	293160	400620	273100	622630	110300	50758	84940	17343	49935	29851	213770	140540	192800	608980	347560	679100	281260	278280	232110	202430	271760	241580	--	--
Lmdn004868	UPLC-MS/MS	591.21	161.02	-	-	592.216	C29H36O13	[M-H]-	Jionoside C	焦地黄苯乙醇苷 C	Phenolic acids	酚酸类	Phenolic acids	酚酸类	120406-33-9	3	-	6014	9	5803.8	123470	142980	175920	148450	216250	222830	82514	65180	19685	9	9	9	9	9	9	9	9	9	9	9	9	20498	34062	26319	--	--
mws1290	UPLC-MS/MS	593.13	285	-	-	594.137	C30H26O13	[M-H]-	Kaempferol-3-O-(6''-p-Coumaroyl)glucoside (Tiliroside)	山奈酚-3-O-(6''-对香豆酰)葡萄糖苷 (银锻苷)	Flavonoids	黄酮	Flavones	黄酮	20316-62-5	3	-	6078.3	6176.1	15360	75327	64160	21594	54974	65070	36547	68595	9	150280	9	9	9	9	9	9	9	9	9	9	9	9	167620	223700	229850	C17140	--
pmb2586	UPLC-MS/MS	593.13	285.6	-	-	594.137	C30H26O13	[M-H]-	Gallocatechin-(4α→8)-catechin	没食子儿茶素-(4α→8)-儿茶素	Flavonoids	黄酮	Flavanols	黄烷醇类	-	3	-	9	9	9	57515	111130	67902	115010	249610	95660	34630	75301	71137	9	9	9	9	9	3013.5	9	9	9	9	9	9	66033	55325	47528	--	--
Zmcp003989	UPLC-MS/MS	595.16	287.05	-	-	594.158	C27H30O15	[M+H]+	Kaempferol-3-O-rhamnosyl(1→2)glucoside	山奈酚-3-O-鼠李糖基(1→2)葡萄糖苷	Flavonoids	黄酮	Flavonols	黄酮醇	-	1	-	29293	72893	528900	24522000	24248000	19289000	35404000	57668000	34663000	13991000	33386000	21341000	17917	15079	9472.5	128270	193580	353520	302960	141270	423570	113340	34628	151450	18103000	16654000	21193000	--	--
pmp000593	UPLC-MS/MS	595.17	449.1	-	-	594.158	C27H30O15	[M+H]+	Luteolin-7-O-rutinoside	木犀草素-7-O-芸香糖苷	Flavonoids	黄酮	Flavones	黄酮	3563-98-2	3	-	22408	13282	168080	2273800	9277200	1569400	2259000	6716200	2368200	30629000	38683000	19278000	55263	216910	49733	228330	262260	170290	597250	1483300	1191700	2232900	2570800	2510300	8585100	9650700	8545600	--	--
Lmsn002815	UPLC-MS/MS	593.15	285.04	-	-	594.158	C27H30O15	[M-H]-	Kaempferol-3-O-rutinoside(Nicotiflorin)	山奈酚-3-O-芸香糖苷(烟花苷)	Flavonoids	黄酮	Flavonols	黄酮醇	17650-84-9	2	-	4097.2	5406.3	48430	1021000	3220400	595410	922780	2178100	933000	13832000	16777000	7089800	28580	82156	8120	45222	42378	45611	111240	440960	310920	325160	573380	447100	2530600	2808100	3256400	C21833	ko00944,ko01110
MWSslk254	UPLC-MS/MS	595.17	287.06	-	-	594.158	C27H30O15	[M+H]+	Kaempferol-3-O-glucorhamnoside	山奈酚-3-O-葡萄糖鼠李糖苷	Flavonoids	黄酮	Flavonols	黄酮醇	40437-72-7	2	-	9	1723	12879	120200	635650	102510	214520	451460	154720	3392700	4242700	1463100	7751	12042	9	11173	24229	6893	25605	107330	72876	203850	215040	202960	606790	579270	768790	--	--
pmp001106	UPLC-MS/MS	595.17	577.16	-	-	594.158	C27H30O15	[M+H]+	Vitexin-2''-O-glucoside	牡荆素-2''-O-葡萄糖苷	Flavonoids	黄酮	Flavonoid carbonoside	黄酮碳糖苷	61360-94-9	1	-	32673	30577	22098	2652000	3963400	2428900	2534200	6331800	3232200	3174900	3702400	980680	365020	190360	184440	7197600	9636200	9698400	10988000	10215000	13396000	5422900	6105700	6367200	4743200	6302000	6375900	C04024	ko00944
Lmsp004247	UPLC-MS/MS	595.17	317.07	-	-	594.158	C27H30O15	[M+H]+	Isorhamnetin-3-O-arabinoside-7-O-rhamnoside	异鼠李素-3-O-阿拉伯糖苷-7-O-鼠李糖苷	Flavonoids	黄酮	Flavonols	黄酮醇	-	2	-	4552	13875	46940	1425700	4238300	1338400	881420	10827000	2507700	8375600	12775000	18093000	12279	10926	6381.2	1084100	1084900	1355900	814320	762560	831520	839460	1436300	2108500	3197900	3385600	3677300	--	--
Lmnp202682	UPLC-MS/MS	595.17	463.13	-	-	594.158	C27H30O15	[M+H]+	5,7,4'-Trihydroxy-8-methoxyflavone-6-C-[Xylosyl-(1-2)]-glucoside	5,7,4'-三羟基-8-甲氧基黄酮-6-C-[木糖-(1-2)]-葡萄糖苷	Flavonoids	黄酮	Flavonoid carbonoside	黄酮碳糖苷	-	2	-	8667.8	9	28078	268750	10766000	929060	342900	25909000	1507600	8820400	39035000	18718000	9	9	9	9	9	9	8280.8	9	9	9	9	9	6376700	7211300	7757200	--	--
MWSHY0061	UPLC-MS/MS	595.16	287.06	-	-	594.158	C27H30O15	[M+H]+	Kaempferol-3-O-neohesperidoside	山奈酚-3-O-新橙皮糖苷	Flavonoids	黄酮	Flavonols	黄酮醇	32602-81-6	2	-	43852	79960	563990	7867200	25494000	5226200	10200000	17683000	7520100	54979000	57937000	47456000	250110	700300	126190	1033200	1084100	573560	2773200	5728800	5174400	9430000	10544000	9449000	24092000	28681000	28177000	--	--
Lmnp102682	UPLC-MS/MS	595.17	463.13	-	-	594.158	C27H30O15	[M+H]+	Hispidulin-8-C-(2''-O-xylosyl)glucoside	高车前素-8-C-(2''-O-木糖基)葡萄糖苷	Flavonoids	黄酮	Flavonoid carbonoside	黄酮碳糖苷	-	2	-	9	5889.3	35207	279400	10335000	907670	389190	27774000	1860800	6885700	36490000	19562000	11368	9	9	9	9	9	9	9	9	9	9	9	6869600	7537200	7493500	--	--
mws1073	UPLC-MS/MS	595.17	457.2	-	-	594.158	C27H30O15	[M+H]+	Apigenin-6,8-di-C-glucoside (Vicenin-2)	芹菜素-6,8-二-C-葡萄糖苷 (新西兰牡荆苷 II)	Flavonoids	黄酮	Flavonoid carbonoside	黄酮碳糖苷	23666-13-9	1	-	232190	184230	185570	20673000	24786000	18074000	17129000	38368000	20077000	15805000	25570000	7497400	2181400	1387400	1193900	40050000	49532000	49771000	53708000	49351000	56188000	34432000	33164000	34817000	29014000	30022000	33708000	C10195	--
MWSHY0080	UPLC-MS/MS	595.17	287.06	-	-	594.158	C27H30O15	[M+H]+	Luteolin-7-O-neohesperidoside (Lonicerin)	木犀草素-7-O-新橘皮糖苷 (忍冬苷)	Flavonoids	黄酮	Flavones	黄酮	25694-72-8	2	-	115140	106480	695750	8042700	26515000	5347700	9902900	17641000	6760300	51131000	55318000	46131000	337990	790910	136330	1115800	1041000	694420	2646500	5138000	4252500	8695900	11441000	9268500	22020000	27473000	31989000	C12630	ko00944
Lmsp004670	UPLC-MS/MS	595.17	287.06	-	-	594.158	C27H30O15	[M+H]+	Kaempferol-3-O-glucoside-7-O-rhamnoside	山奈酚-3-O-葡萄糖苷-7-O-鼠李糖苷	Flavonoids	黄酮	Flavonols	黄酮醇	-	2	-	95765	94072	768630	7336900	26656000	6364700	9408900	20641000	7336900	53438000	62355000	48172000	301630	811740	163890	998650	978500	671180	2770100	5176100	4978400	9105300	11762000	8576500	28541000	27912000	29029000	--	--
Hmmp003156	UPLC-MS/MS	595.16	313.07	-	-	594.158	C27H30O15	[M+H]+	Saponarin(Isovitexin-7-O-glucoside)	皂草苷(异牡荆素-7-O-葡萄糖苷)	Flavonoids	黄酮	Flavones	黄酮	20310-89-8	3	-	9	9	9	133600	214400	131020	152780	310680	136360	111510	200420	55726	20204	42951	7670.5	429970	404860	505020	549810	470820	625440	238910	232000	261610	245090	258110	267160	C08064	--
mws0791	UPLC-MS/MS	593.19	285	-	-	594.195	C28H34O14	[M-H]-	Poncirin (Isosakuranetin-7-O-neohesperidoside)	枸橘苷	Flavonoids	黄酮	Flavanones	二氢黄酮	14941-08-3	3	-	3929.1	9432.9	9838.9	88206	78694	19128	44204	87613	27608	48609	9	130680	9	9	9	9	9	9	9	9	9	9	9	9	142580	195410	165270	C09830	--
Hmyn006303	UPLC-MS/MS	593.27	315.05	-	-	594.278	C27H47O12P	[M-H]-	LysoPI 18:3	溶血磷脂酰肌醇 18:3	Lipids	脂质	Glycerol ester	甘油酯	-	3	-	9	9	9	9	9	9	12141	18651	9	9	72111	9	9	9	9	9	9	9	9	9	9	9	9	9	10730	11440	15608	--	--
Lmtp004044	UPLC-MS/MS	597.14	303.04	-	-	596.138	C26H28O16	[M+H]+	Quercetin-3-O-apiosyl(1→2)galactoside	槲皮素-3-O-芹糖基(1→2)半乳糖苷	Flavonoids	黄酮	Flavonols	黄酮醇	-	3	-	9	8434.2	31304	713740	693910	507460	583510	603100	647980	1129000	707320	1030900	9	6616.8	17025	9	9	9	9	9	22744	9	9	49130	274960	353900	350330	--	--
Lmjp002596	UPLC-MS/MS	597.14	303.05	-	-	596.138	C26H28O16	[M+H]+	Quercetin-3-O-sambubioside	槲皮素-3-O-桑布双糖苷	Flavonoids	黄酮	Flavonols	黄酮醇	83048-35-5	3	-	7572.5	7027	34558	695010	558490	560530	600410	639610	630400	1004700	657310	924570	3314.2	3454	4675.7	9	9	7335.1	15167	9	44935	78830	106780	48399	325550	318170	455320	C12637	ko00944
Lmqn000780	UPLC-MS/MS	606.08	384.98	-	-	607.082	C17H27N3O17P2	[M-H]-	Uridine 5'-diphospho-N-acetylglucosamine	尿苷二磷酸乙酰葡萄糖胺	Nucleotides and derivatives	核苷酸及其衍生物	Nucleotides and derivatives	核苷酸及其衍生物	528-04-1	2	-	55378	55521	61365	55673	54670	30232	10703	5578.3	3575	51651	36586	42934	60128	74694	48747	22403	44707	25367	2706.8	5680.4	2792	29880	46757	28764	21998	30385	30081	C00043	ko00520,ko00524,ko01100
Lmmp000897	UPLC-MS/MS	611.14	287.05	-	-	610.132	C30H26O14	[M+H]+	Gallocatechin-(4α→8)-gallocatechin	没食子儿茶素-(4α→8)-没食子儿茶素	Flavonoids	黄酮	Flavanols	黄烷醇类	-	3	-	9	13353	19924	174430	220180	74200	530530	2188100	603680	2765700	5887800	1144800	19768	6529	3927	130860	73871	198390	284430	429890	411380	431320	268190	537620	558290	766250	771990	--	--
Lmsp004166	UPLC-MS/MS	611.16	303.05	-	-	610.153	C27H30O16	[M+H]+	Quercetin-3-O-glucoside-7-O-rhamnoside	槲皮素-3-O-葡萄糖苷-7-O-鼠李糖苷	Flavonoids	黄酮	Flavonols	黄酮醇	-	1	-	6391	1830.8	18303	213080	1190900	206870	327920	972670	212830	2363200	3614700	1448800	900.1	19210	9	111720	115980	122480	295790	224400	336640	4571800	5685300	2945700	1573600	1712900	1347300	--	--
Zmjp003031	UPLC-MS/MS	611.16	449.11	-	-	610.153	C27H30O16	[M+H]+	Orientin-2''-O-galactoside	荭草素-2''-O-半乳糖苷	Flavonoids	黄酮	Flavonoid carbonoside	黄酮碳糖苷	-	2	-	23188	10754	25136	3908500	5363300	2192400	10265000	15036000	4609700	5534000	7112700	2927000	12485	9934.4	15986	1004700	606440	1189600	3175100	992240	2334900	7633100	8141800	9584800	4561600	4911500	4738500	--	--
Lmjp002461	UPLC-MS/MS	611.16	303.05	-	-	610.153	C27H30O16	[M+H]+	Quercetin-3-O-neohesperidoside	槲皮素 3-O-新橘皮糖苷	Flavonoids	黄酮	Flavonols	黄酮醇	117611-67-3	1	-	9	9	9	166550	203450	69934	560180	632390	206720	196710	318380	130910	9	9	9	23312	13248	34120	98252	33971	69760	249070	260950	260200	151340	151830	144480	--	--
Zmhp003716	UPLC-MS/MS	611.16	303.05	-	-	610.153	C27H30O16	[M+H]+	Rhodionidin	Rhodionidin	Flavonoids	黄酮	Flavonols	黄酮醇	-	1	-	71165	15025	69080	19990000	19271000	10309000	47408000	50720000	21427000	26718000	36423000	15658000	188840	13167	20461	4965400	2812900	6117600	18452000	4756900	11346000	21930000	33910000	34076000	22778000	19716000	23312000	--	--
Zmhn002032	UPLC-MS/MS	609.18	447.13	-	-	610.189	C28H34O15	[M-H]-	4-O-(6'-O-Glucosylcaffeoylglucosyl)-4-hydroxybenzyl alcohol	4-O-(6'-O-葡萄糖基咖啡酰葡萄糖基)-4-羟基苄醇	Phenolic acids	酚酸类	Phenolic acids	酚酸类	-	3	-	9	9	7951	1002700	1021700	686340	3541500	4050800	1377800	1100200	2240500	867550	9	7941.8	9	240710	165000	229110	726540	195290	679920	785060	1100100	1046600	959800	1097100	1023000	--	--
pmp000686	UPLC-MS/MS	611.2	163.03	-	-	610.19	C28H34O15	[M+H]+	Forsythiaside J	连翘酯苷 J	Phenolic acids	酚酸类	Phenolic acids	酚酸类	-	3	-	55783	34791	30165	4133	34001	2301.9	17229	36526	20066	58412	86887	43921	9037.7	4413.2	621.04	7348.2	15208	17315	32911	18259	76898	152310	197970	109960	65890	58637	68078	--	--
Cmdn003997	UPLC-MS/MS	609.2	447.12	-	-	610.211	C25H38O17	[M-H]-	6'-O-α-D-galactopyranosylbarlerin	6'-O-α-D-半乳糖基(8-O-乙酰山栀苷甲酯)	Terpenoids	萜类	Monoterpenoids	倍萜	927691-89-2	3	-	9	9	9	1572500	1244900	818300	3617600	5785400	1471800	1258200	2393000	873250	9	9	9	249000	152710	334670	614310	217700	636000	879410	1226800	1194900	1032400	1022900	1558000	--	--
mws4134	UPLC-MS/MS	611.14	306.08	-	-	612.152	C20H32N6O12S2	[M-H]-	Oxiglutatione	氧化谷胱甘肽	Amino acids and derivatives	氨基酸及其衍生物	Amino acids and derivatives	氨基酸及其衍生物	27025-41-8	3	-	519120	722070	853600	138160	114940	142780	6562.6	5708.2	20241	165720	181630	154920	441380	449490	488370	95308	110070	115130	8979.3	10668	5945.8	130570	85168	108580	153250	167010	197880	C00127	ko00480,ko01100,ko01240
Lhcp102425	UPLC-MS/MS	619.42	455.35	-	-	618.413	C36H58O8	[M+H]+	Prosaikogenin G	前柴胡皂苷元G	Terpenoids	萜类	Triterpene Saponin	三萜皂苷	-	1	-	2245900	1722000	2262600	2180.3	3183.2	9	86941	81991	9	4820.3	9	9	9	9	9	9	9	9	9	9	9	9	9	9	504040	679740	422110	--	--
Lhcp102427	UPLC-MS/MS	619.42	455.35	-	-	618.413	C36H58O8	[M+H]+	3-O-β-D-Fucopyranosyl saikogenin F(iso-02)	前柴胡皂苷元F(iso-02)	Terpenoids	萜类	Triterpene Saponin	三萜皂苷	-	1	-	633140	992600	610600	9	9	9	12384	38733	4669.9	9	3873.8	9	9	9	9	9	9	9	9	9	9	9	9	9	284940	170300	182720	--	--
Rfmb26201	UPLC-MS/MS	621.22	417.16	-	-	622.226	C30H38O14	[M-H]-	Syringaresinol-4'-O-(6''-acetyl)glucoside	丁香树脂酚-4'-O-(6''-乙酰)葡萄糖苷	Lignans and Coumarins	木脂素和香豆素	Lignans	木脂素	-	3	-	1289900	928720	554270	7967400	8207700	6136300	1061300	1684400	3510400	641070	363430	639390	230330	270350	605140	3618200	3835600	7279500	4291600	2498800	5560200	754950	1018000	1504000	2678500	1948300	3035100	--	--
pmp000241	UPLC-MS/MS	625.14	505.09	-	-	624.133	C27H28O17	[M+H]+	Luteolin-6-C-(2''-glucuronyl)glucoside	木犀草素-6-C-(2''-葡萄糖醛酸基)葡萄糖苷	Flavonoids	黄酮	Flavones	黄酮	-	3	-	9	9	9	9	9	9	9	9	9	9	9	5183.5	9	9	9	17708	53511	69768	28248	38222	51762	10756	41393	20276	15224	15633	16248	--	--
Lmzn001664	UPLC-MS/MS	623.13	447.1	-	-	624.133	C27H28O17	[M-H]-	Kaempferol-3-O-glucuronide-7-O-glucoside	山奈酚-3-O-葡萄糖醛酸苷-7-O-葡萄糖苷	Flavonoids	黄酮	Flavonols	黄酮醇	-	2	-	9	9	9	9	9	9	9	9	9	9	9	9	9	9	9	1271800	256400	1256100	4236200	753000	2661500	3218200	1410400	5194500	829020	1324500	1253300	--	--
HJN051	UPLC-MS/MS	623.16	315.05	-	-	624.168	C28H32O16	[M-H]-	Tamarixetin-3-O-rutinoside	柽柳黄素-3-O-芸香糖苷	Flavonoids	黄酮	Flavonols	黄酮醇	-	2	-	22175	45006	708500	843730	4283100	1017300	268870	2376700	597980	6534100	10626000	12520000	3029300	2643200	1380900	2006800	1831300	4492300	1525600	3124600	3363400	10701000	10813000	14296000	5133100	5120000	6548100	--	--
Hmlp004943	UPLC-MS/MS	625.18	317.07	-	-	624.168	C28H32O16	[M+H]+	Nitensoside B	Nitensoside B	Lignans and Coumarins	木脂素和香豆素	Coumarins	香豆素	-	1	-	3422.2	6844.2	138690	285830	1205200	197940	83226	506290	117800	1933000	3678700	3047700	482240	415860	297330	587400	369300	847410	692070	728280	1159400	5413000	4985700	5086900	1674900	1762400	1823400	--	--
Lmsp003939	UPLC-MS/MS	625.18	317.07	-	-	624.169	C28H32O16	[M+H]+	Isorhamnetin-3-O-galactoide-7-O-rhamnoside	异鼠李素-3-O-半乳糖苷-7-O-鼠李糖苷	Flavonoids	黄酮	Flavonols	黄酮醇	-	1	-	136410	378590	532770	8294700	38643000	9143300	2486300	34849000	6855000	7779000	35973000	20693000	1351000	782680	685270	52569000	61819000	62167000	54708000	53769000	51058000	84506000	89673000	95200000	45261000	50196000	42287000	--	--
Lmnp002584	UPLC-MS/MS	625.18	463.13	-	-	624.169	C28H32O16	[M+H]+	Hispidulin-8-C-(2''-O-glucosyl)glucoside	高车前素-8-C-(2''-O-葡萄糖基)葡萄糖苷	Flavonoids	黄酮	Flavonoid carbonoside	黄酮碳糖苷	-	2	-	44625	130030	153070	1770700	10597000	1905000	446110	8580500	1448600	2029300	9894700	5492300	352680	133310	139660	14774000	22422000	19256000	17514000	18765000	13228000	35851000	39588000	43888000	11674000	11970000	13385000	--	--
Lmsp004045	UPLC-MS/MS	625.18	317.07	-	-	624.169	C28H32O16	[M+H]+	Isorhamnetin-3-O-glucoside-7-O-rhamnoside	异鼠李素-3-O-葡萄糖苷-7-O-鼠李糖苷	Flavonoids	黄酮	Flavonols	黄酮醇	-	1	-	137050	340430	563980	7877800	34925000	9299700	2506900	34373000	7192000	7310700	36499000	20439000	1161500	579650	900890	52684000	61656000	59819000	51051000	59017000	46240000	85988000	90469000	99070000	43331000	44767000	42754000	--	--
pmb0603	UPLC-MS/MS	625.18	301.6	-	-	624.169	C28H32O16	[M+H]+	Chrysoeriol-7,4'-di-O-glucoside	金圣草黄素-7,4'-二-O-葡萄糖苷	Flavonoids	黄酮	Flavones	黄酮	-	3	-	9	9	15394	39353	102360	16218	9	53026	16981	195750	346060	265810	49168	41936	42730	61511	46986	68365	45756	76526	130860	470790	447680	471610	162260	176100	164040	--	--
Lmmp002963	UPLC-MS/MS	625.18	317.06	-	-	624.169	C28H32O16	[M+H]+	6-C-Methylquercetin-3-O-rutinoside	6-C-甲基槲皮素-3-O-芸香糖苷	Flavonoids	黄酮	Flavonols	黄酮醇	-	1	-	2820	1882.2	3637.2	53529	213080	42481	22026	313000	40397	54534	239110	128970	7570.5	1010.1	6359.7	367280	557830	491280	546450	428400	404560	749880	969450	1105300	336110	350390	335460	--	--
Lmmp002463	UPLC-MS/MS	625.18	317.07	-	-	624.169	C28H32O16	[M+H]+	Sexangularetin-3-O-glucoside-7-O-rhamnoside	3,5,7,4'-四羟基-8-甲氧基黄酮-3-O-葡萄糖苷-7-O-鼠李糖苷	Flavonoids	黄酮	Flavonols	黄酮醇	-	1	-	2573.2	9384.2	111050	265810	965190	176350	64585	427600	117640	2082400	3287500	2814900	470280	453500	288910	678520	378060	826210	474180	835490	844270	5189500	4598200	4216100	1490500	1653900	1404800	--	--
Lmsp004721	UPLC-MS/MS	625.18	317.07	-	-	624.169	C28H32O16	[M+H]+	Tamarixetin-3-O-glucoside-7-O-rhamnoside	柽柳黄素-3-O-葡萄糖苷-7-O-鼠李糖苷	Flavonoids	黄酮	Flavonols	黄酮醇	-	1	-	4287	13583	123270	263560	1156000	177910	79075	518450	167670	1952200	3510400	3372500	452460	498770	285420	771510	397710	936450	543470	733070	1212000	5615800	4616200	5020200	1706900	1868300	1505900	--	--
pme1540	UPLC-MS/MS	625.18	317.06	-	-	624.169	C28H32O16	[M+H]+	Isorhamnetin-3-O-neohesperidoside	异鼠李素-3-O-新橙皮糖苷	Flavonoids	黄酮	Flavonols	黄酮醇	55033-90-4	1	-	32803	76870	91242	1636400	9097200	1565700	691700	10125000	1370900	1863000	7413500	3213600	277070	163070	180920	12986000	17632000	16217000	15522000	11770000	16411000	28323000	29896000	38831000	10358000	11527000	11484000	--	--
MWSHY0135	UPLC-MS/MS	625.18	317.08	-	-	624.169	C28H32O16	[M+H]+	Isorhamnetin-3-O-rutinoside (Narcissin)	异鼠李素-3-O-芸香糖苷 (水仙苷)	Flavonoids	黄酮	Flavones	黄酮	604-80-8	3	-	4274.8	5089	114610	276090	1325600	162490	75819	506300	138950	1917600	3757400	3156000	436010	595290	301730	696390	408130	765210	551510	865490	1150300	5534100	4764900	4416900	1628200	1568300	1320500	--	--
Lmhp003217	UPLC-MS/MS	625.17	317.06	-	-	624.169	C28H32O16	[M+H]+	2'-Hydoxy,5-methoxyGenistein-O-rhamnosyl-glucoside	2'-羟基-5-甲氧基染料木素-O-鼠李糖-葡萄糖	Flavonoids	黄酮	Isoflavones	异黄酮	-	1	-	5146.5	1633	141140	311360	1240500	217770	73232	543660	138310	1835800	3579200	3219900	436240	485990	322430	631570	429190	854750	658330	750340	1203300	4940500	4898200	5229400	1658700	1855500	1601200	--	--
pmp000127	UPLC-MS/MS	625.18	607.2	-	-	624.169	C28H32O16	[M+H]+	Chrysoeriol-6,8-di-C-glucoside	金圣草黄素-6,8-二-C-葡萄糖苷	Flavonoids	黄酮	Flavonoid carbonoside	黄酮碳糖苷	-	3	-	9	9	9	9	9	9	9	9	9	9	9	9	9	9	9	149600	214260	266200	145240	119300	182260	64489	134520	113890	74038	55537	61705	--	--
Zmhn002574	UPLC-MS/MS	623.16	315.05	-	-	624.169	C28H32O16	[M-H]-	Rhamnazin 3-Glucosyl-Arabinofuranoside	鼠李秦素-3-O-葡萄糖-阿拉伯糖	Flavonoids	黄酮	Flavones	黄酮	-	3	-	9	9	9	16061	22343	21168	134540	25916	21639	64511	21085	68196	22234	9	9	9	9	9	9	9	9	9	9	9	40729	46254	42931	--	--
HJAP026	UPLC-MS/MS	625.18	463.13	-	-	624.17	C28H32O16	[M+H]+	Chrysoeriol-6-C-glucoside-4'-O-glucoside	金圣草黄素-6-C-葡萄糖苷-4'-O-葡萄糖苷	Flavonoids	黄酮	Flavonoid carbonoside	黄酮碳糖苷	-	2	-	42404	82717	150750	1895100	10080000	2210800	652640	10173000	1922600	2173500	9632900	4081800	380830	201990	270190	17295000	22432000	19241000	18194000	17265000	14759000	34654000	45328000	47960000	14133000	13566000	14335000	--	--
Lmcn005735	UPLC-MS/MS	623.2	315.08	-	-	624.205	C29H36O15	[M-H]-	Methylhesperidin	甲基橙皮苷	Flavonoids	黄酮	Flavones	黄酮	11013-97-1	3	-	9	9	9	32856	22467	13863	149620	33198	19698	78870	34135	79728	16141	9	18414	11701	9	9	9	9	9	9	9	9	37240	30469	42157	C17393	--
Hmgp001944	UPLC-MS/MS	625.21	163.03	-	-	624.205	C29H36O15	[M+H]+	Isoacteoside	异毛蕊花糖苷	Phenolic acids	酚酸类	Phenolic acids	酚酸类	61303-13-7	3	-	5978.5	46800	70086	26676	52220	22733	11896	33339	2701.9	73463	123970	118180	48770	5832.5	38376	21355	16266	29036	27034	44186	27378	185830	172760	129580	60208	82864	54575	--	--
Zmhn000666	UPLC-MS/MS	623.2	461.17	-	-	624.205	C29H36O15	[M-H]-	Magnoloside A	厚朴苷 A	Phenolic acids	酚酸类	Phenolic acids	酚酸类	113557-95-2	3	-	9	8081.5	7946.5	296910	715500	458580	51824	126320	121540	53498	153040	120240	9674.5	9	8086.8	9	9	9	9	9	9	9	9	9	72271	55688	89068	C17678	--
pmp001311	UPLC-MS/MS	627.16	303.1	-	-	626.148	C27H30O17	[M+H]+	6-Hydroxykaempferol-7,6'-O-Diglucoside	6-羟基山奈酚-7,6'-O-二葡萄糖苷	Flavonoids	黄酮	Flavonols	黄酮醇	-	1	-	20002	41027	20311	222080	432470	126980	1773900	2314300	553410	1323800	1992200	448720	3691.9	14284	12114	2638400	1947900	5135600	8099900	8267200	5285200	19170000	16357000	13402000	4203400	4604900	4742500	--	--
Zmcp002666	UPLC-MS/MS	627.14	303.05	-	-	626.148	C27H30O17	[M+H]+	Quercetin-3,7-Di-O-glucoside	槲皮素-3,7-二-O-葡萄糖苷	Flavonoids	黄酮	Flavonols	黄酮醇	-	1	-	8195.8	13938	12765	198820	284390	79905	1420100	1777600	329730	872760	1474200	296940	7158.3	8960	15048	1664400	1341300	3410800	5721900	4031000	2611900	12764000	11052000	10943000	2884800	3125200	3465900	--	--
Zmhp003784	UPLC-MS/MS	627.16	465.1	-	-	626.148	C27H30O17	[M+H]+	Rhodioflavonoside	Rhodioflavonoside	Flavonoids	黄酮	Flavonols	黄酮醇	-	1	-	20569	9	9	9	9	9	33674	42247	9	105170	399360	9	9	9	9	250710	157250	340940	241070	278350	269300	862890	1050700	734690	241620	191690	281260	--	--
pmp001310	UPLC-MS/MS	627.16	303.1	-	-	626.148	C27H30O17	[M+H]+	6-Hydroxykaempferol-3,6-O-Diglucoside	6-羟基山奈酚-3,6-O-二葡萄糖苷	Flavonoids	黄酮	Flavonols	黄酮醇	-	1	-	42772	7812.2	11693	156490	368860	142450	200260	431050	113320	6064000	14930000	4322300	16119	47581	44601	1028800	1073400	1900200	1627600	1916200	1485100	15199000	29319000	17556000	4009800	4460000	4701000	--	--
pmb0645	UPLC-MS/MS	627.19	465.2	-	-	626.185	C28H34O16	[M+H]+	Hesperetin-6-C-glucoside-7-O-glucoside	橙皮素-6-C-葡萄糖苷-7-O-葡萄糖苷	Flavonoids	黄酮	Flavonoid carbonoside	黄酮碳糖苷	-	3	-	9	9	9	11764	26760	2433.9	46116	47356	25542	106920	354910	49345	7797.4	9	2097.1	143200	112900	289080	208930	231410	199790	738360	1087800	751810	124270	184620	266710	--	--
pmb0618	UPLC-MS/MS	627.19	465.1	-	-	626.185	C28H34O16	[M+H]+	Hesperetin-8-C-glucoside-3'-O-glucoside	橙皮素-8-C-葡萄糖苷-3'-O-葡萄糖苷	Flavonoids	黄酮	Flavonoid carbonoside	黄酮碳糖苷	-	3	-	9	5835.9	9	45228	108280	19842	356100	382540	125970	226580	319000	114100	9	8002.5	9	361850	326720	1009300	1240400	1086600	1149700	1515400	1119700	1627100	379000	474420	513700	--	--
Hmlp002975	UPLC-MS/MS	639.15	493.1	-	-	638.139	C28H30O17	[M+H]+	Isorhamnetin-3-O-glucuronide-7-O-rhamnoside	异鼠李素-3-O-葡萄糖醛酸苷-7-O-鼠李糖苷	Flavonoids	黄酮	Flavonols	黄酮醇	-	1	-	9	9	9	7522	9	6634.2	9	9	9	9	9	7509.8	9	9	9	212380	150410	323780	313450	271680	438940	420510	227920	486100	127730	131110	149970	--	--
Lmmp002560	UPLC-MS/MS	641.13	303.05	-	-	640.128	C27H28O18	[M+H]+	Quercetin-3-O-(2''-O-glucosyl)glucuronide	槲皮素-3-O-(2''-O-葡萄糖基)葡萄糖醛酸苷	Flavonoids	黄酮	Flavonols	黄酮醇	-	2	-	9	9	9	9	9	9	9	9	9	9	9	9	9	9	9	315320	244500	843100	433190	122300	249340	928350	181200	472650	194930	170200	295910	--	--
Hmcp001578	UPLC-MS/MS	641.17	479.11	-	-	640.163	C28H32O17	[M+H]+	Isorhamnetin-3,7-O-diglucoside	异鼠李素-3,7-O-二葡萄糖苷	Flavonoids	黄酮	Flavonols	黄酮醇	6758-51-6	1	-	5431.8	41124	80776	31880	158270	29960	47878	326580	40965	273340	1848100	624540	1160000	397710	72738	4001100	1448600	3887800	4298500	1991200	3317000	7015400	3704700	7906000	1560100	1520900	2342600	--	--
Lmhp002800	UPLC-MS/MS	641.16	317.06	-	-	640.164	C28H32O17	[M+H]+	2'-Hydoxy,5-methoxyGenistein-4',7-O-diglucoside	2'-羟基-5-甲氧基染料木素-4',7-O-二葡萄糖	Flavonoids	黄酮	Isoflavones	异黄酮	-	3	-	3685	7438.5	5457.5	55480	126690	13842	10202	66930	20956	141150	751760	382040	25028	19554	9104.5	249670	312080	300330	248730	295020	92257	537050	424210	233810	236000	237510	271440	--	--
Lmsp003252	UPLC-MS/MS	641.17	317.07	-	-	640.164	C28H32O17	[M+H]+	Isorhamnetin-3-O-sophoroside	异鼠李素-3-O-槐糖苷	Flavonoids	黄酮	Flavonols	黄酮醇	-	1	-	8163.8	85395	132750	124030	403360	62711	152880	994600	163260	858160	5236400	1771000	2552200	1089100	182450	11210000	5337700	10879000	13875000	7925500	9892000	30838000	20774000	26970000	6592700	6429600	7022300	--	--
pmb2653	UPLC-MS/MS	649.1	145	-	-	650.227	C24H42O20	[M-H]-	D(+)-Melezitose O-rhamnoside	松三糖 O-鼠李糖苷	Others	其它类	Saccharides and Alcohols	糖及醇类	-	3	-	123030	71608	72432	9090.8	2564.1	20626	1306.4	5332.2	1436.4	29752	10715	47054	94728	41165	132380	12682	9581.9	28428	3634.7	1331.1	1503.7	10486	19363	26039	17524	18876	23124	--	--
pmb0530	UPLC-MS/MS	664.12	136.2	-	-	663.109	C21H27N7O14P2	[M+H]+	Nicotinic acid adenine dinucleotide	烟酸腺嘌呤二核苷酸	Nucleotides and derivatives	核苷酸及其衍生物	Nucleotides and derivatives	核苷酸及其衍生物	53-84-9	3	-	160270	67935	73808	55151	42868	18493	28348	16444	9429.9	237990	128210	65853	79826	157660	84325	22728	37279	27736	3927.4	14960	7410.6	87430	126200	88265	42325	50500	60718	C00003	ko00190,ko00730,ko00760,ko01100,ko01240
mws1153	UPLC-MS/MS	665.21	161.02	-	-	666.216	C31H38O16	[M-H]-	2'-Acetylacteoside	2'-乙酰毛蕊花糖苷	Phenolic acids	酚酸类	Phenolic acids	酚酸类	94492-24-7	3	-	5205	25978	13146	223330	188950	81381	276830	548800	236980	203320	228780	116650	10704	7627.2	1978.5	22764	17292	20864	77978	85141	165120	24451	34926	18252	104490	153870	159860	--	--
pmp001276	UPLC-MS/MS	677.37	677.37	-	-	676.367	C33H56O14	[M+H]+	1-Linolenoyl-rac-glycerol-diglucoside	1-亚麻酰单甘油酯-二葡萄糖苷	Lipids	脂质	Free fatty acids	游离脂肪酸	-	3	-	170900	161370	226380	1054300	1167100	1103400	905210	992320	823960	746510	911290	582530	560420	125040	708250	2103000	2392200	2487400	2146600	4019300	2148300	1862500	1242900	1720400	1161800	1311500	1330800	--	--
Lmhp008513	UPLC-MS/MS	677.37	261.22	-	-	676.367	C33H56O14	[M+H]+	2-α-Linolenoyl-glycerol-1,3-di-O-glucoside	2-α-亚麻酸甘油酯-1,3-二-O-葡萄糖苷	Lipids	脂质	Glycerol ester	甘油酯	-	1	-	1675.6	2049.4	12802	59807	77825	52621	37844	26284	109240	16957	55533	23258	4396.2	346.04	880.29	122380	139130	166000	177260	170860	197780	69955	20159	67318	77293	44930	44523	--	--
Lmyn005812	UPLC-MS/MS	675.36	397.14	-	-	676.367	C33H56O14	[M-H]-	Gingerglycolipid A	姜糖脂 A	Lipids	脂质	Glycerol ester	甘油酯	145937-22-0	1	-	45235	44096	83087	544030	341530	210090	327930	646320	437970	445340	492340	311410	62185	31665	35899	1250700	1511800	1607100	4049800	4880200	3329800	1393200	985320	1298400	432830	396260	568450	--	--
Lmhp008744	UPLC-MS/MS	677.37	261.22	-	-	676.367	C33H56O14	[M+H]+	1-α-Linolenoyl-glycerol-2,3-di-O-glucoside	1-α-亚麻酸甘油酯-2,3-二-O-葡萄糖苷	Lipids	脂质	Glycerol ester	甘油酯	-	2	-	5037.9	9190.6	26120	119320	86112	33987	45263	118910	102140	41993	36646	78439	6179	4578.3	2509	217140	169500	175590	280130	685630	194280	110350	141750	193750	91754	60594	68794	--	--
HJN102	UPLC-MS/MS	677.17	515.14	-	-	678.158	C34H30O15	[M-H]-	3,4,5-Tricaffeoylquinic acid	3,4,5-三咖啡酰奎宁酸	Phenolic acids	酚酸类	Phenolic acids	酚酸类	86632-03-3	3	-	267420	768340	457630	2336800	5329200	441360	1652100	2333300	1291200	9074700	4972100	1885600	12996	10469	32224	699710	407770	1403500	3644700	847800	3444700	3165500	4152000	2724200	1801500	2149200	2471400	--	--
Lmgn002250	UPLC-MS/MS	677.17	191.06	-	-	678.18	C31H34O17	[M-H]-	Dicaffeoylquinic acid-O-glucoside	二咖啡酰基奎宁酸-O-葡萄糖苷	Phenolic acids	酚酸类	Phenolic acids	酚酸类	-	2	-	637380	383380	951970	751990	353830	842830	1505000	1416600	2971700	1460500	817720	1741400	296170	88320	384720	445950	539790	597970	1339700	1300700	983850	1208200	1144100	1241800	785180	1023900	1062700	--	--
Lmyn006011	UPLC-MS/MS	677.38	397.13	-	-	678.383	C33H58O14	[M-H]-	Gingerglycolipid B	姜糖脂 B	Lipids	脂质	Glycerol ester	甘油酯	88168-90-5	2	-	39178	54563	52380	74051	89476	98775	17634	28736	50860	26277	32630	40493	210960	110620	211670	391450	209690	363310	349660	298360	299480	272610	146690	211570	72692	72368	67025	--	--
Lmhp009190	UPLC-MS/MS	679.39	263.24	-	-	678.383	C33H58O14	[M+H]+	2-Linoleoylglycerol-1,3-di-O-glucoside	2-亚油酰甘油酯-1,3-二-O-葡萄糖苷	Lipids	脂质	Glycerol ester	甘油酯	-	3	-	95442	134860	89416	78797	152950	163280	53352	106510	79486	44176	55263	27856	297490	90158	269010	258440	216330	643070	172620	181230	186130	104590	118510	117470	129660	89944	189530	--	--
Lmhp009384	UPLC-MS/MS	679.39	263.24	-	-	678.383	C33H58O14	[M+H]+	1-Linoleoylglycerol-2,3-di-O-glucoside	1-亚油酰甘油酯-2,3-二-O-葡萄糖苷	Lipids	脂质	Glycerol ester	甘油酯	-	3	-	12000	6619.2	17464	9892.7	16573	27893	7846.9	7411.1	9754.4	13639	14286	14132	44547	10210	29093	161760	46847	42612	50346	47903	57745	49629	47519	46418	10861	13614	18719	--	--
Lmyn006221	UPLC-MS/MS	679.39	397.13	-	-	680.398	C33H60O14	[M-H]-	Gingerglycolipid C	姜糖脂 C	Lipids	脂质	Glycerol ester	甘油酯	-	2	-	7291	6641.9	13745	3056.7	5900.4	4642.9	2824.6	1987.3	3388.2	4762.1	8880.6	6382.2	11647	9278.6	13888	10945	6061.1	11450	17243	13306	17541	12775	9516.8	16699	10428	8892.1	6068.3	--	--
pmn001370	UPLC-MS/MS	681.24	519.19	-	-	682.247	C32H42O16	[M-H]-	Pinoresinol-4,4'-O-di-O-glucoside	松脂醇-4,4'-O-二-O-葡萄糖苷	Lignans and Coumarins	木脂素和香豆素	Lignans	木脂素	63902-38-5	1	-	348200	222420	371220	2001000	1262100	1624000	1719600	977990	555990	2326300	1504000	896240	139680	111570	99618	1828300	1210800	2137300	1824800	1483900	1426900	4648600	4008000	3199300	1552900	2103000	1914100	--	--
Hmln001931	UPLC-MS/MS	681.24	357.13	-	-	682.247	C32H42O16	[M-H]-	Matairesinol-4,4'-di-O-glucoside	罗汉松脂酚-4,4'-di-O-葡萄糖苷	Lignans and Coumarins	木脂素和香豆素	Lignans	木脂素	-	2	-	5556.2	24891	21407	23581	1267500	16080	168090	2928200	88879	166950	5619500	384450	15402	19877	17237	21857	3817	21658	26696	9866.2	26044	10270	9932	11873	797860	678300	1050600	--	--
Hmsn003050	UPLC-MS/MS	693.39	633.36	-	-	694.39	C37H58O12	[M-H]-	Esculentoside D	商陆皂苷 D	Terpenoids	萜类	Triterpene Saponin	三萜皂苷	89808-50-4	3	-	401110	827920	93390	9	9	9	9	9	9	9	9	9	9	9	9	9	9	9	9	9	9	9	9	9	48451	52040	28823	--	--
Hmcp001629	UPLC-MS/MS	697.16	449.1	-	-	696.153	C30H32O19	[M+H]+	Kaempferol-3-O-(6''-Malonyl)glucoside-7-O-Glucoside	山奈酚-3-O-(6''-丙二酰)葡萄糖苷-7-O-葡萄糖苷	Flavonoids	黄酮	Flavonols	黄酮醇	-	2	-	9	18621	10104	58880	8336	11755	42013	26334	26475	121590	139090	51052	14775	6103	9	13007	2987.8	12724	7682.5	24472	16034	14317	20977	17986	24650	32102	29890	--	--
Lmgn002253	UPLC-MS/MS	695.2	353.09	-	-	696.19	C31H36O18	[M-H]-	Syringoylcaffeoylquinic acid-D-glucose	丁香酰咖啡酰奎宁酸葡萄糖	Phenolic acids	酚酸类	Phenolic acids	酚酸类	-	2	-	95140	151680	87441	363780	366580	304930	588070	753140	285670	474020	806380	401690	80144	18799	79492	219060	185190	252440	448340	297710	604430	412200	550400	518570	377790	410720	279820	--	--
Hmzn004430	UPLC-MS/MS	695.22	371.11	-	-	696.227	C32H40O17	[M-H]-	Sesamolinol 4'-O-B-D-Glucosyl (1->6)-O-B-D-Glucoside	芝麻林素酚 4'-O-β-D-葡萄糖基 (1->6)-O-β-D-葡萄糖苷	Lignans and Coumarins	木脂素和香豆素	Lignans	木脂素	-	3	-	246640	2562000	390000	279640	1205100	261400	9	189020	811680	45413	40146	107440	1529200	1079400	7509100	2001400	1244500	3341000	1591800	82734	5976500	317120	215570	180710	1126900	1158500	1236600	--	--
pmn001368	UPLC-MS/MS	699.25	537.2	-	-	700.258	C32H44O17	[M-H]-	Olivil-4,4'-Di-O-glucoside	橄榄树脂素-4,4'-二-O-葡萄糖苷	Lignans and Coumarins	木脂素和香豆素	Lignans	木脂素	-	2	-	46314	101320	49705	55938	44806	63434	74502	86715	110130	40512	29020	60427	45094	15855	70944	108730	48853	167600	223730	198010	51149	212310	117230	110080	52650	89940	112230	--	--
Hmcp001947	UPLC-MS/MS	711.17	317.06	-	-	710.169	C31H34O19	[M+H]+	Isorhamnetin-3-O-(6''-malonyl)glucoside-7-O-rhamnoside	异鼠李素-3-O-(6''-丙二酰)葡萄糖苷-7-O-鼠李糖苷	Flavonoids	黄酮	Flavonols	黄酮醇	-	2	-	114400	340660	365860	1002300	1079200	485880	76343	162090	156940	886090	462590	613060	1228000	661200	630460	4601300	2374200	10003000	1614900	465960	1044100	3121700	3070000	5379200	2942400	2705800	2510500	--	--
pmb0706	UPLC-MS/MS	713.16	465.1	-	-	712.149	C30H32O20	[M+H]+	Quercetin-3-O-(6''-O-malonyl)glucosyl-5-O-glucoside	槲皮素-3-O-(6''-O-丙二酰)葡萄糖苷-5-O-葡萄糖苷	Flavonoids	黄酮	Flavonols	黄酮醇	-	2	-	9	9682.8	9	39940	19487	9	72129	46796	14353	84770	22148	12580	9	9	9	70826	52697	269480	198550	154750	251210	440900	175830	322760	77397	87108	114440	--	--
pmn001372	UPLC-MS/MS	711.25	549.2	-	-	712.258	C33H44O17	[M-H]-	medioresinol-4,4'-di-O-glucoside	杜仲树脂酚-4,4'-二-O-葡萄糖苷	Lignans and Coumarins	木脂素和香豆素	Lignans	木脂素	88142-63-6	3	-	23754	24226	11792	247790	98125	272680	158550	134350	151920	43534	22565	100140	12954	11373	19249	460140	265450	444470	584310	202280	356260	112630	81564	132490	133280	161000	152130	--	--
Hmcp001658	UPLC-MS/MS	727.17	479.11	-	-	726.164	C31H34O20	[M+H]+	Isorhamnetin-3-O-(6''-malonyl)glucoside-7-O-glucoside	异鼠李素-3-O-(6''-丙二酰)葡萄糖苷-7-O-葡萄糖苷	Flavonoids	黄酮	Flavonols	黄酮醇	-	1	-	7191.9	204590	156470	55087	71340	7262.2	11455	17799	9779.2	147760	188970	174040	2514800	1136000	216250	851190	450660	1686600	374560	381080	448870	2021600	1211200	2276600	584630	656610	766840	--	--
Xmyp004678	UPLC-MS/MS	727.21	287.05	-	-	726.201	C32H38O19	[M+H]+	Kaempferol-3-O-(2-O-Xylosyl-6-O-Rhamnosyl)Glucoside	山奈酚-3-O-(2''-O-木糖基-6''-O-鼠李糖基)葡萄糖苷	Flavonoids	黄酮	Flavonols	黄酮醇	-	1	-	2840.5	12167	11766	837640	571160	605390	4027100	2723800	3087600	9330900	8508500	4673400	2847	9	9	9	9	9	9	9	9	9	9	9	2398700	2412800	2243500	--	--
Zmlp003063	UPLC-MS/MS	741.23	433.12	-	-	740.209	C33H40O19	[M+H]+	Luteolin-7-O-(2''-O-rhamnosyl)rutinoside	木犀草素-7-O-(2''-O-鼠李糖基)芸香糖苷	Flavonoids	黄酮	Flavones	黄酮	-	1	-	12550	18824	59672	4525600	9186700	3887500	4282500	17126000	4122800	16881000	34497000	9616600	21116	13855	9680	315020	171710	132250	268810	280420	271170	1694900	3627300	1653100	5441500	4134100	6507500	--	--
Lmsp003881	UPLC-MS/MS	741.22	287.06	-	-	740.216	C33H40O19	[M+H]+	Kaempferol-3-O-rutinoside-7-O-rhamnoside	山奈酚-3-O-芸香糖苷-7-O-鼠李糖苷	Flavonoids	黄酮	Flavonols	黄酮醇	-	1	-	6225	8303	17409	2040100	2141700	1832200	1735900	5130500	1826000	8206000	19294000	4039100	14597	9004.2	5529	99702	69164	50607	158940	134250	154610	800370	1445500	593160	2061600	2177900	2106100	--	--
Hmdp103165	UPLC-MS/MS	741.22	287.06	-	-	740.216	C33H40O19	[M+H]+	Clitorin	蝶豆素	Flavonoids	黄酮	Flavones	黄酮	55804-74-5	1	-	1355.4	672.28	14590	2332400	2313000	1800500	1696500	6783500	1836500	8397500	9445700	5350300	3643	4541	5025.8	150730	53008	72362	125770	123410	144390	979590	1605400	820560	2783400	1832000	2094100	--	--
mws1035	UPLC-MS/MS	741.22	433	-	-	740.216	C33H40O19	[M+H]+	Kaempferol-3-O-robinoside-7-O-rhamnoside (Robinin)	山奈酚-3-O-刺槐糖苷-7-O-鼠李糖苷 (刺槐苷)	Flavonoids	黄酮	Flavonols	黄酮醇	301-19-9	1	-	19751	19037	34526	3893600	7405200	3492100	3326600	12759000	4032000	15165000	30352000	8962400	9018	9129.8	17656	245210	130640	108640	168490	207360	251290	1400600	2574900	1320500	4620300	4227000	5106300	C10178	--
Hmqp002870	UPLC-MS/MS	743.2	287.06	-	-	742.196	C32H38O20	[M+H]+	Luteolin-7-O-Sophoroside-5-O-arabinoside	木犀草素-7-O-槐糖苷-5-O-阿拉伯糖苷	Flavonoids	黄酮	Flavones	黄酮	-	2	-	9	9	9	81862	24234	40456	103950	72916	141940	93104	11538	125180	9	9	9	9	9	9	9	9	9	9	9	9	41555	50334	31872	--	--
pme2651	UPLC-MS/MS	742.1	620.1	-	-	743.075	C21H28N7O17P3	[M-H]-	NADP (Nicotinamide adenine dinucleotide phosphate)	烟酰胺腺嘌呤二核苷酸磷酸	Nucleotides and derivatives	核苷酸及其衍生物	Nucleotides and derivatives	核苷酸及其衍生物	53-59-8	3	-	46911	55251	46764	10619	19878	23771	9	9	3109.7	5719.8	5165	9329.3	98304	126220	138700	14622	12845	13594	9	9	9	4370.9	9	5162.7	14247	19857	22090	C00006	ko00195,ko00480,ko00760,ko01100,ko01240
Hmgp003409	UPLC-MS/MS	757.22	303.05	-	-	756.211	C33H40O20	[M+H]+	Quercetin-3-O-Soph-7-O-Rha b	Quercetin-3-O-Soph-7-O-Rha b	Flavonoids	黄酮	Flavones	黄酮	-	3	-	16407	9	9	998990	2081400	363400	3451400	3125700	901600	2852600	3709800	440810	9	9	9	72052	33388	47068	382880	184120	401190	5531200	5683000	6017300	1840500	1951600	1809400	--	--
pmp001105	UPLC-MS/MS	757.22	287.06	-	-	756.211	C33H40O20	[M+H]+	Kaempferol-3-O-neohesperidoside-7-O-glucoside	山奈酚-3-O-新橙皮糖苷-7-O-葡萄糖苷	Flavonoids	黄酮	Flavonols	黄酮醇	-	3	-	9	9	17056	58777	49508	88731	25384	26940	25948	134440	262400	122200	24272	16324	5291.8	9	6600.8	9	9	9	4889	30819	11026	34336	38258	44014	39642	--	--
Zmgp002857	UPLC-MS/MS	757.22	303.05	-	-	756.211	C33H40O20	[M+H]+	Quercetin-3-O-α-rhamnosyl (1→2)-[α-rhamnosyl (1→6)]-β-glucoside	槲皮素-3-O-α-鼠李糖基(1→2)-[α-鼠李糖基(1→6)]-β-葡萄糖苷	Flavonoids	黄酮	Flavonols	黄酮醇	-	1	-	11490	2436.8	3990.5	1054000	2145700	375400	3444700	3346300	635210	2450200	3597200	421380	1617.5	2426.2	7222.8	63287	36167	61028	378610	148310	355820	6531800	5915400	5106800	1858800	1826900	2160600	--	--
Zmmp003591	UPLC-MS/MS	757.22	303.05	-	-	757.219	C33H41O20+	[M]+	Delphinidin-3-O-(2'''-O-p-coumaroyl)rutinoside	飞燕草素-3-O-(2'''-O-对香豆酰)芸香糖苷	Flavonoids	黄酮	Anthocyanidins	花青素	-	2	-	9	9	20050	186040	100440	130450	293520	139320	320040	244750	75808	497100	9	9	9	9	9	9	9	9	9	9	9	9	76761	88020	66391	--	--
pmn001505	UPLC-MS/MS	763.43	763.4	-	-	764.435	C41H64O13	[M-H]-	Oleanolic acid-3-O-xylosyl(1→3)glucuronide	齐墩果酸-3-O-木糖基(1→3)葡萄糖醛酸苷	Terpenoids	萜类	Triterpene Saponin	三萜皂苷	-	2	-	1589900	351600	768580	4671200	2375400	8200500	14416000	6208700	11612000	9781200	5811100	14175000	9	9	9	25968	19990	9	58637	27614	9	9	9	9	6607500	6572800	6622800	--	--
Zmcn007922	UPLC-MS/MS	763.43	569.39	-	-	764.435	C41H64O13	[M-H]-	Tarasaponin VI	龙牙楤木皂苷VI	Terpenoids	萜类	Triterpene Saponin	三萜皂苷	59252-95-8	2	-	9	9	9	9	1319.1	9	5216.2	2367.6	9	4482.4	2904.5	2123.3	9	9	9	9	9	9	9	9	9	9	9	9	968.94	548.47	537.25	--	--
Zmcp102707	UPLC-MS/MS	765.48	421.35	-	-	764.471	C42H68O12	[M+H]+	Saikosaponin E	柴胡皂苷E	Terpenoids	萜类	Triterpene Saponin	三萜皂苷	-	2	-	185770	195670	539570	9	9	9	9	9	9	9	9	9	9	9	9	9	9	9	9	9	9	9	9	9	41410	45959	37097	--	--
HJAP119	UPLC-MS/MS	771.22	317.06	-	-	770.226	C34H42O20	[M+H]+	Rhamnetin-3-O-Rutinoside-5-O-rhamnoside	鼠李素-3-O-芸香糖苷-5-O-鼠李糖苷	Flavonoids	黄酮	Flavonols	黄酮醇	-	1	-	14612	75929	70864	2063200	4566500	2761100	363460	857040	1327800	1304500	7660500	1821300	457620	230270	326330	4960000	2578100	4907200	3265900	4714900	4167300	18842000	31885000	26683000	6695100	7397400	7426900	--	--
pmb0592	UPLC-MS/MS	771.23	463.2	-	-	770.227	C34H42O20	[M+H]+	Chrysoeriol-7-O-rutinoside-5-O-glucoside	金圣草黄素-7-O-芸香糖苷-5-O-葡萄糖苷	Flavonoids	黄酮	Flavones	黄酮	-	2	-	46191	128680	102900	3081500	7080500	3736300	380100	881580	1236800	2848500	9059200	3247000	671090	362910	420180	5580700	3441900	6036900	3944300	5212300	6603800	24654000	27004000	27650000	7627200	9203300	9875800	--	--
MWSHY0122	UPLC-MS/MS	771.23	317.07	-	-	770.227	C34H42O20	[M+H]+	Typhaneoside	香蒲新苷	Flavonoids	黄酮	Flavones	黄酮	104472-68-6	1	-	24524	90357	114110	2286600	5826800	2795100	308390	909030	1151700	1727600	8794800	2368800	457470	321150	276690	5159300	2624900	4877700	3960800	4583200	4097300	21475000	33622000	25770000	7341700	8090200	5661700	--	--
Lmsp002982	UPLC-MS/MS	773.21	303.05	-	-	772.206	C33H40O21	[M+H]+	Quercetin-3-O-sophoroside-7-O-rhamnoside	槲皮素-3-O-槐糖苷-7-O-鼠李糖苷	Flavonoids	黄酮	Flavonols	黄酮醇	-	2	-	9	9	5017.5	16005	45263	8807.5	25910	83902	17326	138530	193770	66107	9	9	9	9	2006.7	6690	20330	28978	12798	209780	222280	151280	53377	53657	63224	--	--
Lmmp002334	UPLC-MS/MS	773.21	303.05	-	-	772.206	C33H40O21	[M+H]+	Quercetin-3-O-rutinoside-7-O-glucoside	槲皮素-3-O-芸香糖苷-7-O-葡萄糖苷	Flavonoids	黄酮	Flavonols	黄酮醇	-	2	-	9009	3777.2	3841.2	27488	26738	60084	237300	82434	61406	53015	69285	118180	1058.2	9	740.25	46140	15601	64366	295740	52888	161580	36038	69514	47713	75308	98504	102950	--	--
Zmqp002952	UPLC-MS/MS	773.21	465.1	-	-	773.213	C33H41O21+	[M]+	Delphinidin-3-O-rutinoside-7-O-glucoside	飞燕草素-3-O-芸香糖苷-7-O-葡萄糖苷	Flavonoids	黄酮	Anthocyanidins	花青素	-	2	-	9	9	9	9035.5	5120	9	27029	8966.8	9	14968	7226.1	5770.5	9	9	9	38250	5065.2	38209	112290	3204.5	42293	55239	35965	94277	22126	23820	18576	--	--
pmn001331	UPLC-MS/MS	837.47	777.26	-	-	778.402	C42H66O13	[M+CH3COOH-H]-	16-Keto-saikosaponin A	16-羰基-柴胡皂苷 A	Terpenoids	萜类	Triterpene Saponin	三萜皂苷	-	3	-	62009	70753	52430	9	9	9	9	9	9	9	9	9	9	9	9	9	9	9	9	9	9	9	9	9	5106.7	4361.2	4432.7	--	--
HJN098	UPLC-MS/MS	779.46	779.46	-	-	780.465	C42H68O13	[M-H]-	Azukisaponin I	赤豆皂苷 I	Terpenoids	萜类	Triterpene Saponin	三萜皂苷	82793-02-0	1	-	9	9	9	12513000	13008000	27244000	21964000	23277000	42971000	4490000	15474000	18045000	9	9	9	38409	14359	18767	19317	20435	9	9	9	9	14880000	15936000	17447000	--	--
Lhcp102421	UPLC-MS/MS	781.47	455.35	-	-	780.466	C42H68O13	[M+H]+	Saikosapanin B1	柴胡皂苷B1	Terpenoids	萜类	Triterpene Saponin	三萜皂苷	-	2	-	1558200	1890500	1615400	9	9	9	9	9	9	9	9	9	9	9	9	9	9	9	9	9	9	9	9	9	257740	193710	191870	--	--
mws2191	UPLC-MS/MS	779.46	617.4	-	-	780.466	C42H68O13	[M-H]-	Saikosaponin G	柴胡皂苷 G	Terpenoids	萜类	Triterpene Saponin	三萜皂苷	99365-19-2	3	-	1239800	1559000	1654100	9	1401	9	41329	78938	9	4302.1	9	9	9	9	9	9	9	9	9	9	9	9	9	9	334700	340910	364530	--	--
mws2190	UPLC-MS/MS	779.46	617.3	-	-	780.466	C42H68O13	[M-H]-	Saikosaponin D	柴胡皂苷 D	Terpenoids	萜类	Triterpene	三萜	20874-52-6	1	-	567460	574750	749350	894.95	9	9	18395	26354	905.88	1425.2	9	1185.4	9	9	9	9	9	9	9	9	9	9	9	9	131680	122770	148530	--	--
mws2188	UPLC-MS/MS	779.46	617.4	-	-	780.466	C42H68O13	[M-H]-	Saikosaponin A	柴胡皂苷 A	Terpenoids	萜类	Triterpene	三萜	20736-09-8	3	-	3321900	3928300	3902700	2245.6	2006.1	9	48610	128660	6898.6	4516.1	5176.5	9	9	9	9	9	9	9	9	9	9	9	9	9	936110	643380	803980	C08975	--
Hmmp006067	UPLC-MS/MS	798.5	439.36	-	-	780.467	C42H68O13	[M+NH4]+	Oleanolic acid-3-O-glucosyl(1→2)glucoside	齐墩果酸-3-O-葡萄糖基(1→2)葡萄糖苷	Terpenoids	萜类	Triterpene Saponin	三萜皂苷	-	2	-	2152	3197.7	9	132180	67612	391420	452210	191430	123960	664350	270100	1684100	9	9	9	9	9	9	9	9	9	78389	49666	36193	224530	252630	200010	--	--
pme2746	UPLC-MS/MS	784.15	437	-	-	785.157	C27H33N9O15P2	[M-H]-	Riboflavin 5'-Adenosine Diphosphate	核黄素-5'-腺嘌呤二磷酸	Nucleotides and derivatives	核苷酸及其衍生物	Nucleotides and derivatives	核苷酸及其衍生物	146-14-5	3	-	238270	254620	426230	171320	151570	229830	172310	110650	208970	309370	249920	319930	232230	224320	205440	189020	148740	177320	71988	94494	70916	252670	181420	250130	191920	228420	272920	C00016	ko00740,ko01100,ko01110,ko01240
Hmcp001589	UPLC-MS/MS	787.23	317.06	-	-	786.221	C34H42O21	[M+H]+	Isorhamnetin-3-O-rutinoside-4'-O-glucoside	异鼠李素-3-O-芸香糖苷-4'-O-葡萄糖苷	Flavonoids	黄酮	Flavonols	黄酮醇	111393-97-6	1	-	4075.8	18072	158320	25749	123350	18365	7968.2	19283	9355.4	78636	238750	128120	973780	572410	298470	351100	146220	345930	168170	133710	122060	1229500	822080	873900	305090	254360	300250	--	--
Lmhp003162	UPLC-MS/MS	787.23	625.17	-	-	786.222	C34H42O21	[M+H]+	Chrysoeriol-6,8-di-C-glucoside-4'-O-glucoside	金圣草黄素-6,8-二-C-葡萄糖苷-4'-O-葡萄糖苷	Flavonoids	黄酮	Flavonoid carbonoside	黄酮碳糖苷	-	2	-	9	9380.8	21706	12137	31476	9	9	9	6104	19623	42241	18801	135580	69394	27824	142400	76528	157080	62134	40396	36585	243290	166880	281190	63176	83878	57524	--	--
pmb0620	UPLC-MS/MS	787.23	625.1	-	-	786.222	C34H42O21	[M+H]+	Chrysoeriol-6,8-di-C-glucoside-7-O-glucoside	金圣草黄素-6,8-二-C-葡萄糖苷-7-O-葡萄糖苷	Flavonoids	黄酮	Flavones	黄酮	-	3	-	9	5360	16936	13236	16852	8146	6105.2	3055.2	7433.5	14946	41999	20362	115380	72616	37691	138090	58255	140860	56846	32298	25105	275600	146510	239160	47454	52476	64082	--	--
Lmsp003790	UPLC-MS/MS	787.23	317.07	-	-	786.222	C34H42O21	[M+H]+	Isorhamnetin-3-O-sophoroside-7-O-rhamnoside	异鼠李素-3-O-槐糖苷-7-O-鼠李糖苷	Flavonoids	黄酮	Flavonols	黄酮醇	41328-75-0	1	-	8884	12278	12344	704410	108900	74889	18396	71124	32743	136090	223520	244980	174050	130730	241070	2200600	4199100	1273400	1195300	1363500	852910	2469900	2949900	1888200	731620	983960	990850	--	--
mws1150	UPLC-MS/MS	785.25	623.2	-	-	786.258	C35H46O20	[M-H]-	Echinacoside	松果菊苷	Phenolic acids	酚酸类	Phenolic acids	酚酸类	82854-37-3	3	-	9	9	9	31654	7851.1	6120.8	9	4404	9	17991	35820	65884	12283	17839	29398	274290	524100	114220	103740	135400	29288	129820	200990	78160	90517	74852	63417	C10450	--
Cmdn004237	UPLC-MS/MS	785.25	623.2	-	-	786.258	C35H46O20	[M-H]-	Betonyoside E	Betonyoside E	Phenolic acids	酚酸类	Phenolic acids	酚酸类	181301-30-4	3	-	9	9	9	56525	31016	9482.2	8897.2	13394	5029.3	21058	52955	114920	42166	48200	72558	627600	1287700	310740	314000	328490	113320	447120	464050	241910	204810	221300	233150	--	--
Zmcp102709	UPLC-MS/MS	797.46	489.36	-	-	796.461	C42H68O14	[M+H]+	Saikosaponin L	柴胡皂苷L	Terpenoids	萜类	Triterpene Saponin	三萜皂苷	-	1	-	862370	1518600	432610	9	9	9	9	10832	9	9	9	9	9	9	9	9	9	9	9	9	9	9	9	9	100340	139620	165290	--	--
mws2187	UPLC-MS/MS	811.48	649.4	-	-	812.492	C43H72O14	[M-H]-	Saikosaponin B4	柴胡皂苷 B4	Terpenoids	萜类	Triterpene Saponin	三萜皂苷	58558-09-1	2	-	174070	248840	128890	9	9	9	4488.2	17050	9	9	9	9	9	9	9	9	9	9	9	9	9	9	9	9	15034	28596	36458	--	--
mws2194	UPLC-MS/MS	811.48	649.4	-	-	812.492	C43H72O14	[M-H]-	Saikosaponin B3	柴胡皂苷 B3	Terpenoids	萜类	Triterpene	三萜	58316-42-0	3	-	157110	312870	128490	9	9	9	9	22316	9	9	1078.6	9	9	9	9	9	9	9	9	9	9	9	9	9	37651	32525	39453	--	--
Zmcp102720	UPLC-MS/MS	913.51	437.34	-	-	912.508	C47H76O17	[M+H]+	Bupleurumwenchuanense	2''-O-β-D-吡喃木糖基-柴胡皂苷b2	Terpenoids	萜类	Triterpene Saponin	三萜皂苷	-	1	-	160490	227460	158820	68122	82293	57318	179710	194670	203850	36010	110220	38987	9	9	9	9	9	9	9	9	9	9	9	9	91173	95252	90521	--	--
Zmcp102719	UPLC-MS/MS	913.51	437.34	-	-	912.508	C47H76O17	[M+H]+	saikosaponin K	柴胡皂苷K	Terpenoids	萜类	Triterpene Saponin	三萜皂苷	-	1	-	281160	427580	222780	78749	102070	74918	222790	270200	256370	61942	148830	48368	9	9	9	9	9	9	9	9	9	9	9	9	124060	122370	93818	--	--
Zmcp102716	UPLC-MS/MS	913.51	437.34	-	-	912.508	C47H76O17	[M+H]+	Rotundifolioside A	圆叶柴胡果苷A	Terpenoids	萜类	Triterpene Saponin	三萜皂苷	-	1	-	342370	302210	280820	71300	89502	94496	205750	259850	265180	58208	147080	49500	9	9	9	9	9	9	9	9	9	9	9	9	134590	137390	96275	--	--
Zmcp102715	UPLC-MS/MS	913.51	437.34	-	-	912.508	C47H76O17	[M+H]+	Rotundifolioside H	圆叶柴胡果苷H	Terpenoids	萜类	Triterpene Saponin	三萜皂苷	-	1	-	161070	423340	305650	89027	103190	106260	218070	215800	305600	79504	152380	70845	9	9	9	9	9	9	9	9	9	9	9	9	97886	134180	139220	--	--
Hmmp005664	UPLC-MS/MS	913.51	455.35	-	-	912.508	C47H76O17	[M+H]+	Akeboside Stf	木通皂苷 Stf	Terpenoids	萜类	Triterpene Saponin	三萜皂苷	-	3	-	9	9	9	12335	8489.6	24641	27060	29730	50383	1554.4	5304	12216	9	9	9	9	9	9	9	9	9	9	9	9	7777.1	9098.2	7980.7	C17546	--
Zmcp007018	UPLC-MS/MS	927.49	439.36	-	-	926.488	C47H74O18	[M+H]+	Durupcoside A	Durupcoside A	Terpenoids	萜类	Triterpene Saponin	三萜皂苷	107656-74-6	1	-	9	9	9	13913	9788.6	9573.6	26612	19404	9	15634	9	12875	9	9	9	9	9	9	9	9	9	9	9	9	11539	14045	4438.4	--	--
Zmcp107018	UPLC-MS/MS	927.49	439.36	-	-	926.488	C47H74O18	[M+H]+	Araloside J	楤木皂苷 J	Terpenoids	萜类	Triterpene Saponin	三萜皂苷	-	2	-	5756.2	9	9	6594	9	62452	4562.4	9	91588	9744.4	9	112420	9	9	9	9	9	9	9	9	9	9	9	9	22719	38187	15488	--	--
Zmcp102804	UPLC-MS/MS	927.53	421.35	-	-	926.524	C48H78O17	[M+H]+	saikosaponin C	柴胡皂苷C	Terpenoids	萜类	Triterpene Saponin	三萜皂苷	-	1	-	1925900	801990	808900	9	9	9	9	45037	9	9	9	9	9	9	9	9	9	9	9	9	9	9	9	9	239410	136230	383790	--	--
Lhcp102415	UPLC-MS/MS	927.52	421.35	-	-	926.524	C48H78O17	[M+H]+	Saikosaponin BK1	柴胡皂苜BK1	Terpenoids	萜类	Triterpene Saponin	三萜皂苷	110352-77-7	1	-	1078000	743520	992800	9	9	9	9	20160	9	9	9	9	9	9	9	9	9	9	9	9	9	9	9	9	247280	236920	233970	C08976	--
Zmcp102701	UPLC-MS/MS	929.55	423.36	-	-	928.54	C48H80O17	[M+H]+	Rotundifolioside C	圆叶柴胡果苷C	Terpenoids	萜类	Triterpene Saponin	三萜皂苷	-	2	-	797420	651720	538900	9	9	9	32747	100210	9	8709.6	9	9	9	9	9	9	9	9	9	9	9	9	9	9	115150	201300	120790	--	--
Lhcp102414	UPLC-MS/MS	929.54	423.36	-	-	928.54	C48H80O17	[M+H]+	Saikosaponin F	柴胡皂苷F	Terpenoids	萜类	Triterpene Saponin	三萜皂苷	62687-63-2	1	-	926690	549670	571450	9	9	9	32459	73720	9	5956.9	9	9	9	9	9	9	9	9	9	9	9	9	9	9	145940	151810	147920	--	--
Lmsp004090	UPLC-MS/MS	933.27	317.07	-	-	932.259	C43H48O23	[M+H]+	Isorhamnetin-3-O-(6''-O-p-coumarol)sophoroside-7-O-rhamnoside	异鼠李素-3-O-(6''-O-对香豆酰)槐糖苷-7-O-鼠李糖苷	Flavonoids	黄酮	Flavonols	黄酮醇	-	3	-	838.5	3363.5	1729	24799	31362	24905	1722.5	5093.5	6810.8	19552	23905	15900	28956	17116	47338	188640	546150	46687	98261	494880	106440	1165800	2150300	400040	335990	271680	365190	--	--
Cmhp005343	UPLC-MS/MS	943.52	455.35	-	-	942.519	C48H78O18	[M+H]+	Cussonoside A	Cussonoside A	Terpenoids	萜类	Triterpene Saponin	三萜皂苷	57539-70-5	3	-	392550	619920	85619	9	9	9	9	9	9	9	9	9	9	9	9	9	9	9	9	9	9	9	9	9	45085	69756	53746	--	--
Lhcp102410	UPLC-MS/MS	943.52	437.34	-	-	942.519	C48H78O18	[M+H]+	Saikosaponin N	柴胡皂苷N	Terpenoids	萜类	Triterpene Saponin	三萜皂苷	161068-50-4	1	-	474470	658480	1398700	9	9	9	9	9	9	9	9	62895	9	9	9	9	9	9	9	9	9	9	9	9	72684	85354	89106	--	--
Lhcp102411	UPLC-MS/MS	943.52	437.34	-	-	942.519	C48H78O18	[M+H]+	Saikosaponin S	柴胡皂苷S	Terpenoids	萜类	Triterpene Saponin	三萜皂苷	-	2	-	198390	490760	449240	9	9	9	9	9	9	9	9	9	9	9	9	9	9	9	9	9	9	9	9	9	52462	43536	37358	--	--
Lmmn005092	UPLC-MS/MS	955.46	955.46	-	-	956.462	C47H72O20	[M-H]-	Medicagenic acid-3-O-glucuronide-28-O-rhamnosyl(1,2)-arabinoside	苜蓿酸-3-O-葡萄糖醛酸苷-28-O-鼠李糖基(1,2)-阿拉伯糖苷	Terpenoids	萜类	Triterpene Saponin	三萜皂苷	-	3	-	39107	750280	106880	100080	472460	484810	371500	120700	205430	234540	99655	414770	9	9	9	9	9	9	9	9	9	9	9	9	128350	138960	154410	--	--
Lmmn005003	UPLC-MS/MS	1087.51	1087.5	-	-	1088.5	C52H80O24	[M-H]-	Medicagenic acid-3-O-glucuronide-28-O-xylosyl(1,4)-rhamnosyl(1,2)-arabinoside	苜蓿酸-3-O-葡萄糖醛酸苷-28-O-木糖基(1,4)-鼠李糖基(1,2)-阿拉伯糖苷	Terpenoids	萜类	Triterpene Saponin	三萜皂苷	128192-15-4	3	-	1147300	259330	237040	34043	32310	9	9	30113	9	9	263500	9	9	9	9	9	9	9	9	9	9	9	9	9	34748	45091	40272	--	--
XMW0757	GC-MS	-	-	74	87	284.272	C18H36O2	-	Hexadecanoic acid, 15-methyl-, methyl ester	十六酸十五甲酯	Ester	酯	-	-	6929-04-0	-	1990	3239.09	1915.49	2128.9	4817.48	2363.87	42338.5	3958.34	1572.37	3020.26	6893.86	66334	11961	12100.9	9032.9	14421.2	12479.2	16662.8	42197	28618.7	24528.8	33859.9	31086.8	50131.4	48630.7	17552.8	16587.5	11851	--	--
KMW0719	GC-MS	-	-	57	71	282.329	C20H42	-	Eicosane	二十烷	Hydrocarbons	烃类	-	-	112-95-8	-	2000	16502	16514.6	5714.59	11884.1	6224.65	17014.3	9412.6	6588.66	12656	19176.1	19709	56568.4	9	9	9	9460.34	6213.15	14035.2	27023.9	22516.7	17491.3	31003.4	17611.4	22014.2	28809.2	23921	29494.3	--	--
XMW0958	GC-MS	-	-	57	41	282.084	C11H23I	-	1-Iodoundecane	1-碘十一烷	Hydrocarbons	烃类	-	-	4282-44-4	-	1534	98684	101945	67332.6	337235	220760	302872	348199	514348	447042	1.7675e+06	1.47199e+06	1.43916e+06	42852.6	21623.4	69389.7	149465	80008.9	91180.1	1.12427e+06	903175	1.10768e+06	1.23355e+06	1.35646e+06	1.09206e+06	929376	724650	663266	--	--
XMW0755	GC-MS	-	-	69	41	272.25	C20H32	-	m-Camphorene	间樟脑	Terpenoids	萜类	-	-	20016-73-3	-	1960	27240.9	24376.2	9289.85	44441.7	17263.9	42921.5	13498.1	17669.5	35440.7	101296	57539.6	244723	7579.81	9	9	23826.7	9351.55	23196	78341.7	46309.6	57382.5	123509	48867.3	90449.2	85159.6	57429.3	67838.7	--	--
XMW0017	GC-MS	-	-	74	87	270.256	C17H34O2	-	Hexadecanoic acid, methyl ester	十六酸甲酯	Ester	酯	-	-	112-39-0	-	1926	3214.56	2309.49	1733.48	4193.84	1844.45	40969.1	4126.97	1579.91	3199.23	7200.9	65353.7	11487.2	12026.4	9001.11	14635	12719	16451.6	41362.2	28042.9	24420.5	33744.6	30115.4	50481.8	48329.6	17676.6	16700.4	11364	C16995	--
XMW0230	GC-MS	-	-	57	71	268.313	C19H40	-	Pentadecane, 2,6,10,14-tetramethyl-	2,6,10,14-四甲基-十五烷	Hydrocarbons	烃类	-	-	1921-70-6	-	1690	19634.2	12299.8	12618	54073.3	27508.3	68023.6	42933.7	35671.8	56759.6	102190	61666.1	170624	9	9	9	41563.7	27832	45616.8	46127.3	60474	40120.9	71069.6	57086.1	69777.6	61518.3	58080.8	58126.3	--	--
XMW1353	GC-MS	-	-	88	55	268.24	C17H32O2	-	(Z)-Ethyl pentadec-9-enoate	（Z）-十五碳九烯酸乙酯	Ester	酯	-	-	56219-09-1	-	1865	1328.01	616.368	1154.13	4922.07	2151.46	5013.51	2235.1	2095.13	2511.21	2544.46	3341.38	8683.96	2979.33	968.892	2563.96	4175.95	2189.46	4620.41	3840.39	2700.41	6378.1	4745.32	3780.05	5076.19	6864.54	5977.97	6516.3	--	--
XMW0636	GC-MS	-	-	85	71	268.069	C10H21I	-	1-iodo-Decane	1-碘-癸烷	Others	其它类	-	-	2050-77-3	-	1433	472575	351914	266830	4771.11	3134.59	3969.87	3045.64	3334.15	2162.35	2935.96	5288.38	4165.74	958918	3.40802e+06	1.13867e+06	11599.7	8899.93	3773.24	6672.53	6208.5	3481.75	10539.9	20373.5	9585.06	568727	468397	440092	--	--
KMW0713	GC-MS	-	-	69	41	264.209	C17H28O2	-	2,6,10-Dodecatrien-1-ol, 3,7,11-trimethyl-, acetate, (E,E)-	（E，E）-醋酸法呢酯	Ester	酯	-	-	4128-17-0	-	1843	9	10666.4	9	54785.7	22247.3	43229.8	28091.2	22928.7	30516.2	76259.4	63285.7	138782	311297	297445	342657	9	9	9	9	9	9	9	9	9	157262	138388	131905	--	--
XMW1486	GC-MS	-	-	161	105	264.209	C17H28O2	-	5-Azulenemethanol, 1,2,3,4,5,6,7,8-octahydro-.alpha.,.alpha.,3,8-tetramethyl-, acetate, [3S-(3.alpha.,5.alpha.,8.alpha.)]-	[3S-（3α，5α。，8α。）]-5-天青烯乙醇，1,2,3,4,5,6,7,8-八氢-α，α，3,8-四甲基-乙酸酯	Ester	酯	-	-	134-28-1	-	1727	150331	52593.4	136785	1.01248e+06	537590	1.09293e+06	671578	623878	772436	927006	1.34876e+06	2.9925e+06	15139.1	8912.5	13955.4	1.03989e+06	482624	863751	1.5671e+06	1.25411e+06	1.10953e+06	969158	830682	1.09139e+06	1.40019e+06	1.58018e+06	1.55881e+06	--	--
XMW1033	GC-MS	-	-	187	145	262.193	C17H26O2	-	trans-Valerenyl acetate	反式-戊烯基乙酸酯	Ester	酯	-	-	101527-74-6	-	1832	67775.2	10067.2	48377.7	28250.9	14296.9	26308.6	18408.9	19664.5	24264.2	32307.8	38275.2	82993.5	24548.1	25427.2	29310.9	17422.1	12365.9	16600.1	34585.9	33665.7	27147.4	33501.1	27228.1	35319	44365.9	32345.6	33434.5	--	--
NMW0298	GC-MS	-	-	129	57	258.183	C14H26O4	-	Hexanedioic acid, bis(2-methylpropyl) ester	己二酸双（2-甲基丙基）酯	Ester	酯	-	-	141-04-8	-	1695	74578	25560.8	53475.5	105428	43795	133201	65701.8	52217.7	104675	175806	113295	404379	5252.4	5312.34	12161.7	78717.7	62811.9	82614.8	118358	120456	97637.8	117957	120298	140451	140299	137348	156531	C14260	--
NMW0337	GC-MS	-	-	185	129	258.183	C14H26O4	-	Dibutyl adipate	己二酸二丁酯	Ester	酯	-	-	105-99-7	-	1766	3856.86	4380.08	2770.44	11380.3	8998.86	11296.2	6010.54	4730.11	5574.05	11596.2	10222.6	35351	2251.37	1586.76	3410.44	8343.67	4284.74	6609.05	12045.6	11024.4	8695.81	8694.38	8049.17	8727.53	9020.57	12606.7	8603.22	C14253	--
XMW0221	GC-MS	-	-	57	71	254.297	C18H38	-	Heptadecane, 7-methyl-	7-甲基-十七烷	Hydrocarbons	烃类	-	-	20959-33-5	-	1740	114302	58086.1	50199.4	397818	185953	379071	254260	213375	338866	385174	451989	1.03773e+06	63393.2	62280.4	454479	369376	179615	298133	544919	470649	384264	393754	331326	582508	600207	623138	630817	--	--
WMW0203	GC-MS	-	-	55	69	254.225	C16H30O2	-	Palmitoleic Acid	棕榈油酸	Acid	酸	-	-	373-49-9	-	1951	38144.5	33647.5	10741.4	30336	11651.3	32359.8	16448.7	13226.1	29228.3	51026.1	47604.3	208872	14191.7	9	9	19200.9	9142.52	16001.5	57906.8	40212.5	37076.6	55487.7	37173.4	50052.6	68328.8	57473.9	61695.6	--	--
D242	GC-MS	-	-	55	41	254.225	C16H30O2	-	9-Tetradecen-1-ol, acetate, (E)-	（E）-9-四氢萘-1-醇乙酸酯	Ester	酯	-	-	23192-82-7	-	1800	4917	3489.84	24152.4	42035.3	23438.3	89348	24987.5	18619.5	54691.6	49033.9	35801.6	77770.3	232315	126873	221630	33649.5	18141.6	23745.2	47830.2	43263.7	38522.8	59125.6	51817.7	53137.9	128712	108721	111468	--	--
D398	GC-MS	-	-	82	67	254.225	C16H30O2	-	5-Tetradecen-1-ol, acetate, (Z)-	Z-5-十四碳烯基乙酸酯	Ester	酯	-	-	35153-13-0	-	1790	11274.7	8681.34	10070.8	78205.4	36733.7	109598	42233.8	41865.6	63571	65826.9	64022.1	137970	186873	99539.9	171486	47619.1	29248.2	48383.5	78700.1	101353	60680.5	77767.4	59522.5	65190.9	165343	137706	140076	--	--
XMW1491	GC-MS	-	-	93	69	252.209	C16H28O2	-	Lavandulyl caproate	辛酸癸酸	Acid	酸	-	-	59550-36-6	-	1650	295787	218362	252400	782544	483223	1.03486e+06	383141	412384	834082	3.08219e+06	2.66852e+06	3.99145e+06	61364.7	22102.4	72042.3	987519	1.17932e+06	908848	930257	1.87997e+06	940350	1.82844e+06	3.48163e+06	1.85045e+06	1.55201e+06	1.3875e+06	1.33119e+06	--	--
XMW1258	GC-MS	-	-	133	119	252.173	C15H24O3	-	Acetic acid, (4,6,8,9-tetramethyl-3-oxabicyclo[3.3.1]non-6-en-1-yl)methyl ester	（4,6,8,9-四甲基-3-氧杂双环[3.3.1]非6-烯-1-基）乙酸甲酯	Terpenoids	萜类	-	-	309722-81-4	-	1667	429369	163338	353109	8.58065e+06	3.97631e+06	9.9215e+06	3.84599e+06	2.5756e+06	5.03566e+06	4.02003e+06	4.19104e+06	1.22808e+07	32481.9	22763.4	25472.5	5.6307e+06	2.91227e+06	4.12347e+06	7.6323e+06	5.98506e+06	5.6924e+06	3.34629e+06	3.06507e+06	4.28714e+06	6.7691e+06	8.34966e+06	8.35479e+06	--	--
NMW0333	GC-MS	-	-	71	70	247.157	C15H21NO2	-	Meperidine	哌替啶	Heterocyclic compound	杂环化合物	-	-	57-42-1	-	1758	23830.4	7653.86	16358.1	13764.4	3528.12	10852.7	7001.49	6550.89	11821.1	18607.8	10670	74526.8	4164.85	2412.01	12187.8	8711.58	5887.59	8062.32	19606.8	16734.8	14603.6	16220.6	17126.9	13354.6	25871.9	24862.9	25418.6	C07128	--
w14	GC-MS	-	-	57	71	242.261	C16H34O	-	Octane, 1,1'-oxybis-	1,1'-氧双-辛烷	Hydrocarbons	烃类	-	-	629-82-3	-	1688	19910	8497	10004	39045.2	22392	45948	35744.6	26951	47962	66324	58035	146422	9	9	9	31183.4	27646.7	36716.4	39053.9	44236.5	32161.3	41679.2	31956.7	40694.4	46200	44076	42842	--	--
XMW1046	GC-MS	-	-	113	85	242.188	C14H26O3	-	Heptanoic acid, anhydride	庚酰基庚酸酯	Ester	酯	-	-	626-27-7	-	1676	21269.9	13250.2	13215.8	46648.6	33113.9	47869.4	42867.8	37534.6	40828.7	49269	59840	83678.7	9657.5	9006.39	9104.06	37768.4	28377.9	37491.8	37980.6	41425	35675.8	33308.6	37864.5	34925.5	48411.6	40365.3	38940.9	--	--
XMW0265	GC-MS	-	-	57	71	240.282	C17H36	-	Tetradecane, 2,6,10-trimethyl-	2,6,10-三甲基十四烷	Hydrocarbons	烃类	-	-	14905-56-7	-	1539	12541.6	55820.5	12830.5	41299.5	114344	49833.4	38929.5	127437	56739.4	110466	329509	128840	1760.84	9	9	11898.8	8988.56	7645.8	38176.3	27906.8	43353.7	38046.5	28802.8	27478.4	66198.3	55378.1	50488.2	--	--
NMW0297	GC-MS	-	-	41	82	240.245	C16H32O	-	Oxirane, tetradecyl-	十四烷基-环氧乙烷	Hydrocarbons	烃类	-	-	7320-37-8	-	1676	113939	55901	92008.5	1.66762e+06	882856	1.87939e+06	848656	600387	1.08323e+06	933461	953182	2.61902e+06	20327	14989.7	18179.1	1.32768e+06	899791	1.55325e+06	1.67558e+06	1.57558e+06	1.45464e+06	711882	841900	1.18403e+06	1.4538e+06	1.82069e+06	1.87806e+06	C14499	--
D130	GC-MS	-	-	104	91	240.115	C16H16O2	-	Benzeneacetic acid, 2-phenylethyl ester	苯乙酸2-苯乙基酯	Ester	酯	-	-	102-20-5	-	1922	1312	4592	203	9	9	9	9	9	9	9	3048.36	9	23234	18922.7	28405	5334	12428	8357	16315	27043	15188	10088	45296	26378	30199	20670	17764	--	--
NMW0362	GC-MS	-	-	91	148	239.167	C17H21N	-	BenzphetAmine	苯丙胺	Amine	胺	-	-	156-08-1	-	1830	60541.3	78764.4	124204	209824	74457.4	179151	103113	88037.8	158235	342034	213773	800215	6660938	6489089	7260410	224139	96987.2	142422	280934	239658	221563	391840	267951	306304	2.49252e+06	1.86703e+06	1.88221e+06	C07538	--
D441	GC-MS	-	-	69	41	238.193	C15H26O2	-	Butanoic acid, 3-methyl-, 3,7-dimethyl-2,6-octadienyl ester, (Z)-	异戊酸内酯	Ester	酯	-	-	3915-83-1	-	1582	47989	35710.6	43030.3	425480	165007	187742	175719	230256	133499	2.36874e+06	1.47362e+06	1.1612e+06	57557.2	34758.3	35784.8	295651	266024	471988	361812	527946	462174	608188	1.08712e+06	862786	560730	449670	409930	--	--
XMW1264	GC-MS	-	-	136	163	238.193	C15H26O2	-	Acetic acid, 1-methyl-3-(2,6,6-trimethylcyclohex-1-enyl)propyl ester	4-（2,6,6-三甲基环己烯-1-基）丁烷-2-基乙酸酯	Ester	酯	-	-	86756-12-9	-	1615	72398.5	87497.3	82018.6	833031	404169	729907	339180	446586	466752	3.8674e+06	1.34796e+06	2.28412e+06	10905.7	7716.29	18504.3	1.88685e+06	1.90772e+06	3.47458e+06	1.44903e+06	2.91791e+06	2.10205e+06	1.41076e+06	3.056e+06	3.93437e+06	1.24518e+06	1.2858e+06	1.23072e+06	--	--
KMW0638	GC-MS	-	-	69	41	238.193	C15H26O2	-	Geranyl isovalerate	异戊酸香叶基酯	Ester	酯	-	-	109-20-6	-	1606	48841	52740.4	54459.8	929575	342457	466109	360372	295462	390633	897103	567122	1.01975e+06	13146.5	12691	44070.2	1.6784e+06	1.6358e+06	3.35708e+06	1.50633e+06	2.58321e+06	2.25321e+06	1.63255e+06	2.24529e+06	2.42736e+06	1.05255e+06	1.34429e+06	1.43304e+06	--	--
NMW0280	GC-MS	-	-	143	85	238.193	C15H26O2	-	2-Furanmethanol, tetrahydro-.alpha.,.alpha.,5-trimethyl-5-(4-methyl-3-cyclohexen-1-yl)-, [2S-[2.alpha.,5.beta.(R*)]]-	[2S-[2α，5bR*）]]-四氢-α，α，5-三甲基-5-（4-甲基-3-环己烯-1-基）-2-呋喃甲醇	Terpenoids	萜类	-	-	26184-88-3	-	1655	18603.7	25767.4	13879.1	67152.5	52045.8	71686	42510.1	44522	51992.1	67413.2	98874	129310	11072	6997.5	3846.21	21514	13683.8	17808.7	39779.9	31596.3	30928.5	38673.7	31739.6	33435.5	60618.7	48647.9	46467.5	C16774	--
XMW0111	GC-MS	-	-	123	109	236.178	C15H24O2	-	Spiro[4.5]decan-7-one, 1,8-dimethyl-8,9-epoxy-4-isopropyl-	1,8-二甲基-8,9-环氧-4-异丙基-螺癸烷	Terpenoids	萜类	-	-	61050-91-7	-	1626	680075	440661	814827	2.45594e+06	1.27501e+06	3.68163e+06	1.28736e+06	1.10012e+06	2.32832e+06	3.01465e+06	2.38098e+06	8.30498e+06	41314.7	33192.5	19563.9	2.25721e+06	962095	1.72281e+06	3.47799e+06	2.5345e+06	2.1639e+06	2.82986e+06	2.19907e+06	2.5813e+06	2.63729e+06	2.94924e+06	2.87344e+06	--	--
XMW0972	GC-MS	-	-	133	91	234.198	C16H26O	-	Khusimyl methyl ether	苦参基甲基醚	Ether	醚	-	-	300349-20-6	-	1680	399162	189441	329110	8.56022e+06	3.94691e+06	1.00609e+07	3.90271e+06	3.09372e+06	5.11835e+06	4.07982e+06	5.19991e+06	1.40561e+07	33034.5	22530	25313.6	5.5713e+06	3.44565e+06	4.49193e+06	7.71811e+06	6.04638e+06	5.741e+06	3.40787e+06	3.10807e+06	4.34011e+06	6.85073e+06	8.26671e+06	8.28615e+06	--	--
NMW0318	GC-MS	-	-	105	133	234.162	C15H22O2	-	Curcumenol	姜黄烯醇	Terpenoids	萜类	-	-	19431-84-6	-	1735	650640	218133	419693	5.61326e+06	2.50104e+06	5.14328e+06	3.6061e+06	2.81352e+06	4.71821e+06	5.0755e+06	6.06307e+06	1.59669e+07	149094	32506.8	218138	5.78149e+06	2.47641e+06	5.98242e+06	8.02344e+06	6.58699e+06	7.2809e+06	4.05008e+06	3.93785e+06	6.23171e+06	7.98484e+06	8.39726e+06	8.35591e+06	C16942	--
NMW0277	GC-MS	-	-	132	150	234.089	C13H14O4	-	(S)-4-(1-Acetoxyallyl)phenyl acetate	（S）-4-（1-乙酰氧基烯丙基）苯乙酸酯	Ester	酯	-	-	52946-22-2	-	1650	36686.3	32736.5	31616.8	73002.9	86226.3	130140	56793.5	80240	108636	538855	564375	818124	6675.98	2743.62	6157.34	91029	50338.1	60574.1	123696	150221	113859	276666	482160	253362	302794	250636	240103	C10426	--
XMW1441	GC-MS	-	-	134	135	233.099	C12H15N3S	-	Thiazol-2-Amine, N-(4-dimethylaminobenzyl)-	N-（4-二甲基氨基苄基）-噻唑-2-胺	Amine	胺	-	-	13159-95-0	-	1966	45363.4	38745.9	11300.9	23228.2	6181.54	21583.6	7722.2	8822.76	18716.7	36001.4	28804.2	137700	9	9	9	14089	3077.14	7036.98	39280.9	21914.9	19701.7	40394.4	23922.3	33019.8	57604.3	40722.7	39859.9	--	--
NMW0287	GC-MS	-	-	79	67	232.219	C17H28	-	1,8,11,14-Heptadecatetraene, (Z,Z,Z)-	（Z，Z，Z）-1,8,11,14-庚二烯	Hydrocarbons	烃类	-	-	10482-53-8	-	1664	389988	163842	305313	7.20183e+06	3.46866e+06	8.14126e+06	3.34131e+06	2.41621e+06	4.26301e+06	3.76346e+06	4.19447e+06	1.10896e+07	38585	29358.3	34580	4.80489e+06	3.04166e+06	5.40572e+06	6.57582e+06	5.56029e+06	5.19396e+06	2.84866e+06	2.85789e+06	4.29211e+06	5.85111e+06	7.23203e+06	7.12589e+06	C17535	--
XMW1184	GC-MS	-	-	115	130	232.146	C15H20O2	-	Butanoic acid, 3-methyl-, 8-decene-4,6-diynyl ester, (Z)-	（Z）-8-癸烯-4,6-二炔-1-基3-甲基丁酸酯	Ester	酯	-	-	126693-81-0	-	1832	9	9	9	23747	12505	23013.2	9239.12	7874	13691	20163	22807	55052.3	9	9	9	9500	4143	6383.01	19466	13099	14253	14316	9875	15361	35967	27956	30400	--	--
XMW0622	GC-MS	-	-	101	57	230.152	C12H22O4	-	Butanedioic acid, bis(2-methylpropyl) ester	丁二酸双（2-甲基丙基）酯	Ester	酯	-	-	925-06-4	-	1420	6420.24	137150	5479.14	11362.7	199608	10926	7186.14	264127	15508	57259.8	763107	76961.8	2234.88	1236.22	3053.04	8625.96	4070.24	3696.96	46913.7	24730.3	36956.1	45584.3	28746.1	39963.6	166523	124974	117692	--	--
D347	GC-MS	-	-	56	57	228.209	C14H28O2	-	n-Capric acid isobutyl ester	正癸酸异丁酯	Ester	酯	-	-	30673-38-2	-	1546	13535.5	30005.9	12568.7	32267.6	63474.7	36420.4	25470.1	72076.5	42159.3	84857.7	181173	96053.7	2108.99	9	548.335	7248.32	5251.01	4939.37	28355.2	21159.7	30286.8	28158.8	20901	23003.9	44518.3	39112.8	34466.9	--	--
KMW0642	GC-MS	-	-	57	71	226.266	C16H34	-	Hexadecane	十六烷	Hydrocarbons	烃类	-	-	544-76-3	-	1600	3815.63	2698.43	6050.02	41468.8	23649	68562.3	14216.8	11957.4	38302.3	42554.8	27118.1	82771.9	9	9	1062.04	23146.9	14151.9	21559.1	30518.5	26943.6	28317.2	54865.5	37538.5	40606.8	29773.9	32558.2	27135.4	--	--
XMW0259	GC-MS	-	-	57	41	226.266	C16H34	-	Pentadecane, 2-methyl-	2-甲基-十五烷	Hydrocarbons	烃类	-	-	1560-93-6	-	1563	7769.41	67629.7	5218.02	18381.9	106779	22153.7	11181.9	105370	19507.8	45620.4	266951	63055.5	4162.31	3445.35	3947.12	38307.5	22193.2	17424.8	28433	18096.1	25213	28438.3	29249	30041.4	40033.3	32195.4	29432.3	--	--
XMW0159	GC-MS	-	-	57	71	226.266	C16H34	-	2,6,10-Trimethyltridecane	2,6,10-三甲基十三烷	Hydrocarbons	烃类	-	-	3891-99-4	-	1449	95686.6	185558	43910.2	1.45764e+06	558754	551815	805396	823955	797689	4.03777e+06	2.2526e+06	2.14189e+06	38109.8	36937.7	57431.9	1.99721e+06	1.77636e+06	1.97152e+06	3.79413e+06	4.44259e+06	5.42366e+06	2.62579e+06	4.03987e+06	5.54345e+06	2.78603e+06	2.27173e+06	2.17146e+06	--	--
D397	GC-MS	-	-	67	82	226.193	C14H26O2	-	11-Dodecen-1-yl acetate	11-十二烷基-1-基乙酸酯	Ester	酯	-	-	35153-10-7	-	1604	48184.2	34151.7	79305	549067	289075	894363	189178	153637	510463	514906	213450	1.09487e+06	3430.34	1581.45	3801.82	315406	186849	284802	410321	340609	363166	653750	436022	528410	388254	410950	357142	--	--
KMW0585	GC-MS	-	-	81	95	226.193	C14H26O2	-	Citronellyl isobutyrate	异丁酸香茅酯	Ester	酯	-	-	97-89-2	-	1483	227952	255733	209492	2.15501e+06	950176	1.48878e+06	1.27306e+06	1.24092e+06	2.08157e+06	1.60855e+08	9.58307e+07	9.80914e+07	36741.6	29813.5	25391.9	3.10796e+06	3.48796e+06	1.81048e+06	7.31621e+06	1.09989e+07	7.16508e+06	8.65574e+07	1.04753e+08	5.46931e+06	4.86146e+06	4.21936e+06	3.724e+06	--	--
D314	GC-MS	-	-	67	82	226.193	C14H26O2	-	8-Dodecen-1-ol, acetate, (Z)-	（Z）-8-十二烯-1-醇乙酸酯	Ester	酯	-	-	28079-04-1	-	1605	44907.7	55431.5	51139.4	534721	229869	324175	281342	233849	315935	759009	490407	894408	13368.2	9935.29	50701.6	948193	856020	1.73347e+06	1.0997e+06	1.6023e+06	1.51468e+06	1.14832e+06	1.22535e+06	1.57569e+06	676568	783351	815797	--	--
XMW1308	GC-MS	-	-	69	55	226.118	C10H17F3O2	-	1-Octyl trifluoroacetate	1-辛基三氟乙酸酯	Ester	酯	-	-	2561-21-9	-	1059	17821.2	14897.2	53148.3	795510	706791	802646	685839	1.22307e+06	1.52246e+06	4.10812e+06	2.69684e+06	5.15464e+06	13152.5	28187.2	32869.7	1.69853e+06	947522	1.04712e+06	5.02897e+06	3.87753e+06	6.1414e+06	5.78809e+06	4.58846e+06	6.12953e+06	2.32623e+06	1.77901e+06	1.71645e+06	--	--
XMW0916	GC-MS	-	-	91	92	226.036	C11H15Br	-	(5-bromopentyl)-Benzene,	（5-溴戊基）-苯	Halogenated hydrocarbons	卤代烃	-	-	14469-83-1	-	1487	522938	634728	493587	5.31446e+06	2.15572e+06	3.15858e+06	2.96712e+06	2.95582e+06	4.86568e+06	1.96396e+08	1.16599e+08	1.1904e+08	89936.8	69313.9	57116.6	9.02763e+06	1.01548e+07	5.34198e+06	2.25519e+07	3.2063e+07	2.08403e+07	1.08965e+08	1.39604e+08	1.54963e+07	1.30231e+07	1.07663e+07	9.62627e+06	--	--
KMW0619	GC-MS	-	-	69	71	224.178	C14H24O2	-	Butanoic acid, 3,7-dimethyl-2,6-octadienyl ester, (E)-	丁酸香叶酯	Ester	酯	-	-	106-29-6	-	1562	45207.5	436607	35877	116376	656359	159287	90508.6	654884	134257	245842	1.65074e+06	253748	19360	13541.5	16112.9	230517	118926	98570.4	162625	103934	128203	150272	139898	140136	266513	212461	197160	--	--
KMW0558	GC-MS	-	-	93	41	224.178	C14H24O2	-	1,5-Dimethyl-1-vinyl-4-hexenyl butyrate	丁酸芳基酯	Ester	酯	-	-	78-36-4	-	1418	5.599e+06	2.81186e+07	4.72088e+06	4.51705e+06	3.77489e+07	4.84659e+06	3.33119e+06	4.7916e+07	6.53206e+06	1.81251e+07	1.24331e+08	2.8277e+07	2.79137e+06	1.23625e+06	4.07304e+06	2.86725e+06	1.81663e+06	1.33298e+06	1.48735e+07	9.93582e+06	1.09517e+07	1.36736e+07	1.03864e+07	1.04261e+07	3.36317e+07	2.50794e+07	2.48788e+07	--	--
KMW0591	GC-MS	-	-	71	95	224.178	C14H24O2	-	Butanoic acid, 1,7,7-trimethylbicyclo[2.2.1]hept-2-yl ester, endo-	丁酸冰片酯	Ester	酯	-	-	13109-70-1	-	1476	53073.7	35344.5	36254.4	92042.5	64379.3	100845	124887	79580.8	84675.8	1.69536e+07	1.03169e+07	1.08932e+07	22894.7	16661.9	14638.3	107653	81192.3	104323	839163	1.74657e+06	3.08724e+06	9.45491e+06	1.07419e+07	7.47062e+06	5.07197e+06	4.02072e+06	3.62108e+06	--	--
D246	GC-MS	-	-	69	93	224.178	C14H24O2	-	Propanoic acid, 2-methyl-, 3,7-dimethyl-2,6-octadienyl ester, (Z)-	[（2Z）-3,7-二甲基辛基-2,6-二烯基] 2-甲基丙酸酯	Ester	酯	-	-	2345-24-6	-	1475	1.29491e+06	1.38724e+06	1.09764e+06	2.51556e+06	1.78059e+06	2.78299e+06	3.53928e+06	2.30208e+06	2.32612e+06	4.58533e+08	2.77469e+08	2.92816e+08	610129	434325	444724	4.16364e+06	2.34579e+06	3.41611e+06	1.41077e+07	4.6629e+07	8.02785e+07	2.50845e+08	2.87883e+08	1.96543e+08	1.35798e+08	1.08253e+08	9.77723e+07	--	--
KMW0647	GC-MS	-	-	83	41	224.141	C13H20O3	-	Methyl jasmonate	茉莉酸甲酯	Ester	酯	-	-	1211-29-6	-	1638	43336.5	30564.6	36799.8	156167	74868.1	180043	74414.5	74431.8	157725	301170	242963	587893	9	9	9	200707	249018	189122	215194	401910	182319	281838	568387	319910	239764	226470	219969	C11512	ko00592,ko01110
XMW0646	GC-MS	-	-	165	95	224.141	C13H20O3	-	2-Benzofurancarboxylic acid, 2,4,5,6,7,7a-hexahydro-4,4,7a-trimethyl-, methyl ester, cis-	顺式2,4,5,6,7,7a-六氢-4,4,7a-三甲基-2-苯并呋喃羧酸甲酯	Ester	酯	-	-	77383-92-7	-	1517	369497	318112	358304	363757	333142	324482	352193	342557	270220	78303.7	102913	79056.7	231653	214605	255205	542589	713421	494935	106358	310767	146239	98577.1	226780	170506	226119	259433	211311	--	--
XMW0749	GC-MS	-	-	67	81	222.235	C16H30	-	8-Hexadecyne	8-十六烷	Hydrocarbons	烃类	-	-	19781-86-3	-	1695	110275	57799.6	78842.9	349956	115155	328985	200396	172567	274908	514729	365552	988667	10991.8	8517.13	9	281429	213016	311510	235107	360183	259258	375578	365222	395564	331240	247424	233501	--	--
D241	GC-MS	-	-	69	41	222.198	C15H26O	-	3-Cyclohexene-1-methanol, .alpha.,4-dimethyl-.alpha.-(4-methyl-3-pentenyl)-, [R-(R*,R*)]-	[R-（R *，R *）]-α，4-二甲基-α-（4-甲基-3-戊烯基）-3-环己烯-1-甲醇	Terpenoids	萜类	-	-	23178-88-3	-	1625	56097.8	82762.1	72740.2	1.27453e+06	444570	905972	399230	444596	502813	2.40351e+06	1.81486e+06	2.31687e+06	19522.8	17588.6	41883.9	3.4107e+06	3.56485e+06	6.50845e+06	2.05714e+06	4.85648e+06	3.47194e+06	2.03878e+06	5.30931e+06	7.10144e+06	1.97731e+06	2.07597e+06	1.99448e+06	--	--
XMW0389	GC-MS	-	-	111	123	222.198	C15H26O	-	Caryophyllenyl alcohol	石竹烯醇	Terpenoids	萜类	-	-	913176-41-7	-	1574	14824.2	20032.1	7603.34	31017.1	48821.5	47117.3	11650.9	10103.1	18636.5	28280.8	31678.6	50269.2	10558.3	10554.7	10141.6	65411.7	21343.7	47016.2	37095.1	12479.1	25130	29189.1	15327.8	46115.8	37546.3	28597.1	28219.9	--	--
KMW0687	GC-MS	-	-	109	69	222.198	C15H26O	-	1H-Cycloprop[e]azulen-4-ol, decahydro-1,1,4,7-tetramethyl-, [1aR-(1a.alpha.,4.beta.,4a.beta.,7.alpha.,7a.beta.,7b.alpha.)]-	（+）-香豆素醇	Terpenoids	萜类	-	-	552-02-3	-	1591	32197.1	28317.6	52604.9	351290	213407	571053	127394	127167	312103	339292	246698	692026	2202.31	1204.77	1748.96	200911	117323	185413	248353	218546	211967	397279	276656	329627	253507	271930	235641	--	--
KMW0652	GC-MS	-	-	119	41	222.198	C15H26O	-	Cubenol	（-）-小茴香酚	Phenol	酚	-	-	21284-22-0	-	1642	159720	157266	124622	234959	362084	383136	143356	258331	284169	994604	1.29581e+06	1.94577e+06	25814.7	14066.6	37626.7	408887	342898	361799	505266	711464	470720	692926	1.10943e+06	754681	728736	687987	623239	--	--
D319	GC-MS	-	-	119	93	222.198	C15H26O	-	.beta.-Acorenol	β-阿可诺尔	Terpenoids	萜类	-	-	28400-11-5	-	1649	195070	157266	138012	353796	483097	495960	200543	405491	408699	986279	1.71927e+06	1.7362e+06	34914.8	14017.8	49366.8	402565	330131	333631	485493	697209	464400	749750	1.13955e+06	881290	730432	701101	670836	--	--
KMW0671	GC-MS	-	-	69	119	222.198	C15H26O	-	(1R,4R)-1-methyl-4-(6-Methylhept-5-en-2-yl)cyclohex-2-enol	姜油烯醇	Alcohol	醇	-	-	58334-55-7	-	1616	60656.9	89595.3	78507.4	1.31041e+06	479680	935776	459536	418464	559966	3.50641e+06	1.98294e+06	2.52759e+06	21341.6	17856.4	46815.4	3.56663e+06	3.72052e+06	6.72149e+06	2.20298e+06	5.23538e+06	3.76224e+06	2.26512e+06	5.61024e+06	7.72901e+06	2.03959e+06	2.15673e+06	2.00228e+06	--	--
XMW0842	GC-MS	-	-	41	55	222.198	C15H26O	-	Palustrol (Ledum)	喇叭茶醇	Terpenoids	萜类	-	-	5986-49-2	-	1568	34803.7	41702.6	38073.7	93741.5	36966.1	102931	74649.8	63931.5	116736	244773	146371	225209	9871.95	2838.79	1729.51	15433.2	12719.1	13868	74355.5	43950.2	96876.2	71615.6	49217.2	66387.7	81187.1	58770.1	48907.5	--	--
XMW0558	GC-MS	-	-	204	85	222.198	C15H26O	-	1,4-Methanoazulen-9-ol, decahydro-1,5,5,8a-tetramethyl-, [1R-(1.alpha.,3a.beta.,4.alpha.,8a.beta.,9S*)]-	[1R-（1α，3aβ，4α，8aβ，9S *） ]-十氢-1,5,5,8a-四甲基-1,4-甲烷七氮烯-9-醇	Terpenoids	萜类	-	-	465-24-7	-	1592	15728	16024	13139	28482	21541	27089	31683	45085	35076	68912	58255	62451	6866	2510	12926	14639	10831	11887	43146	30021	42066	32706	28364	27479	41187	29068	25385	--	--
WMW0075	GC-MS	-	-	41	69	222.198	C15H26O	-	1,6,10-Dodecatrien-3-ol, 3,7,11-trimethyl-	3,7,11-三甲基-1,6,10-十二碳三烯-3-醇	Terpenoids	萜类	-	-	7212-44-4	-	1563	25387.2	323463	23685.8	75510	499016	94375.5	62787.2	505331	91851.8	167417	1.2112e+06	185303	10763.8	5780.56	8257.12	117265	60765	55238.6	99425.6	66643.6	83296.6	90267.3	86206.5	86079.3	181913	150781	133804	C09704	ko00909,ko01100
KMW0685	GC-MS	-	-	41	69	222.198	C15H26O	-	trans-Farnesol	（E）-法尼醇	Terpenoids	萜类	-	-	106-28-5	-	1722	176470	62735.2	89137.5	1.62228e+06	750557	1.53577e+06	1.05504e+06	854676	1.41346e+06	1.42851e+06	1.76333e+06	4.32869e+06	31417.1	16639.7	99924.4	1.63565e+06	717721	1.5084e+06	2.37881e+06	1.96853e+06	1.86412e+06	1.16419e+06	1.17108e+06	1.66667e+06	2.23623e+06	2.53975e+06	2.52733e+06	C01126	ko00900,ko00909,ko01110
XMW0027	GC-MS	-	-	161	122	222.198	C15H26O	-	Ledol	勒多尔	Terpenoids	萜类	-	-	577-27-5	-	1565	743658	609362	770133	2.42157e+06	1.16949e+06	2.72513e+06	2.12982e+06	1.81499e+06	3.11201e+06	8.08679e+06	4.75288e+06	7.61331e+06	162184	54077.5	25636.7	548500	425085	422395	2.3765e+06	1.78657e+06	2.86709e+06	2.3693e+06	1.79988e+06	2.08929e+06	2.91723e+06	2.12374e+06	1.83022e+06	C09698	--
XMW0843	GC-MS	-	-	81	123	222.198	C15H26O	-	(2E,4S,7E)-4-Isopropyl-1,7-dimethylcyclodeca-2,7-dienol	（2E，4S，7E）-4-异丙基-1,7-二甲基环癸-2,7-二烯醇	Alcohol	醇	-	-	198991-79-6	-	1574	9629	13795.1	4515.43	21758.2	13854.2	50478.8	55762.4	25461.6	130816	227108	92930.8	271356	8997.52	8356.58	5859.1	20546.2	11469.9	24700.6	64868.6	77833.7	150538	142300	248580	141630	79577.4	61669.8	55542.2	--	--
KMW0661	GC-MS	-	-	109	119	222.198	C15H26O	-	.alpha.-Bisabolol	Α-没药醇	Alcohol	醇	-	-	515-69-5	-	1684	259112	157361	197016	3.324e+06	1.72877e+06	3.65411e+06	1.67611e+06	1.35683e+06	2.04357e+06	2.02566e+06	2.41711e+06	5.29043e+06	45429.3	34457.1	43873.7	2.41011e+06	1.61986e+06	2.9374e+06	3.04079e+06	2.97268e+06	2.56178e+06	1.45071e+06	1.63851e+06	2.29685e+06	2.91754e+06	3.41847e+06	3.39638e+06	C09621	ko01100
KMW0656	GC-MS	-	-	59	149	222.198	C15H26O	-	2-Naphthalenemethanol, decahydro-.alpha.,.alpha.,4a-trimethyl-8-methylene-, [2R-(2.alpha.,4a.alpha.,8a.beta.)]-	β-乙醛	Terpenoids	萜类	-	-	473-15-4	-	1649	2097.97	1456.23	1396.2	7223.4	3861.08	9778.8	2478.99	3911.07	6875.57	38820.3	39333.4	54334.4	629.064	381.196	648.85	15783.5	29142.9	19496.7	13831.4	34825.5	16213.4	27017	64620.3	31638.5	23465.6	18657.3	17460.3	C09664	--
KMW0667	GC-MS	-	-	95	121	222.198	C15H26O	-	.tau.-Muurolol	丁三醇	Alcohol	醇	-	-	19912-62-0	-	1642	215420	131760	186106	695660	347290	806922	285510	271074	624991	1.07502e+06	876920	1.98599e+06	44032.2	19315.9	63808.7	710609	913164	675246	696595	1.40892e+06	620564	936632	1.79122e+06	1.14818e+06	810098	753019	731987	--	--
D244	GC-MS	-	-	161	105	222.198	C15H26O	-	(3S,3aR,3bR,4S,7R,7aR)-4-Isopropyl-3,7-dimethyloctahydro-1H-cyclopenta[1,3]cyclopropa[1,2]benzen-3-ol	（3S，3aR，3bR，4S，7R，7aR）-4-异丙基-3,7-二甲基八氢-1H-环戊[1,3]环丙烷[1,2]苯-3-3-醇	Terpenoids	萜类	-	-	23445-02-5	-	1515	1.88311e+08	1.59363e+08	1.88169e+08	4.95226e+08	2.86572e+08	4.77823e+08	4.15337e+08	3.86803e+08	5.45266e+08	1.24895e+09	8.70453e+08	1.45427e+09	2.6449e+07	2.44999e+07	8.28767e+06	3.14714e+08	1.82065e+08	2.05524e+08	1.04099e+09	7.1089e+08	8.84804e+08	9.04858e+08	6.78936e+08	8.10019e+08	7.60033e+08	6.17302e+08	5.70178e+08	C20172	--
KMW0673	GC-MS	-	-	95	121	222.198	C15H26O	-	.alpha.-Cadinol	α-卡迪诺	Terpenoids	萜类	-	-	481-34-5	-	1653	206758	127365	183994	695660	347499	808185	285510	271263	624991	1.07804e+06	883137	1.98614e+06	39139.5	19082.6	50845.9	696447	911114	668643	675675	1.39203e+06	588186	953497	1.76034e+06	1.07273e+06	777821	708627	693055	--	--
NMW0310	GC-MS	-	-	69	41	222.198	C15H26O	-	2,6,10-Dodecatrien-1-ol, 3,7,11-trimethyl-	3,7,11-三甲基-2,6,10-十二碳三烯-1-醇	Terpenoids	萜类	-	-	4602-84-0	-	1714	208550	49502.2	118625	2.07057e+06	966755	1.91697e+06	1.26246e+06	1.02955e+06	1.67204e+06	1.74957e+06	2.20078e+06	5.53964e+06	26573.4	12912.4	84310	2.01982e+06	891821	1.73749e+06	2.92536e+06	2.43034e+06	2.14214e+06	1.38703e+06	1.41843e+06	1.81739e+06	2.81879e+06	3.09919e+06	3.08228e+06	C01126	ko00900,ko00909,ko01110
XMW0854	GC-MS	-	-	119	161	222.198	C15H26O	-	4a(2H)-Naphthalenol, 1,3,4,5,6,8a-hexahydro-4,7-dimethyl-1-(1-methylethyl)-, (1S,4S,4aS,8aR)-	（1S，4S，4aS，8aR）-1,3,4,5,6,8a-六氢-4,7-二甲基-1-（1-甲基乙基）-4a（2H）-萘	Terpenoids	萜类	-	-	73365-77-2	-	1614	85705.8	117270	110342	1.08043e+06	477169	848445	485450	465884	554292	1.23744e+06	1.00488e+06	1.47341e+06	20802.2	16195.1	45056	2.84785e+06	2.67036e+06	5.14252e+06	1.93169e+06	3.7936e+06	2.95803e+06	1.76193e+06	3.77174e+06	5.47127e+06	1.38611e+06	1.46218e+06	1.3932e+06	--	--
XMW0705	GC-MS	-	-	59	149	222.198	C15H26O	-	2-Naphthalenemethanol, 1,2,3,4,4a,5,6,8a-octahydro-.alpha.,.alpha.,4a,8-tetramethyl-, [2R-(2.alpha.,4a.alpha.,8a.beta.)]-	[2R-（2α，4a ，8aβ]]-1,2,3,4,4a，5,6,8a-八氢-α，α，4a，8-四甲基-2-萘甲醇	Terpenoids	萜类	-	-	473-16-5	-	1653	3211.93	1843.21	2407.35	22009.5	10386.9	17990.4	9532.84	8898.3	11480.1	26028.2	29810.8	53812.1	1464.08	1251.81	1203.03	5466.62	2919.63	4110.28	13992.7	9339.12	9056.76	14133	14023.5	13347.4	25529.3	16520.9	16761.6	C09663	--
WMW0149	GC-MS	-	-	95	150	222.198	C15H26O	-	Cedrol	雪松	Terpenoids	萜类	-	-	77-53-2	-	1600	75967.9	79782.7	81536	673514	342037	692638	484697	286571	579344	1.33274e+06	689296	1.58111e+06	13625.1	11683.4	65050.7	856233	696829	1.51404e+06	1.34018e+06	1.58961e+06	1.76424e+06	1.85034e+06	1.15234e+06	1.65793e+06	768552	800102	841359	C09631	--
NMW0350	GC-MS	-	-	124	41	222.126	C13H18O3	-	(S,E)-4-Hydroxy-3,5,5-trimethyl-4-(3-oxobut-1-en-1-yl)cyclohex-2-enone	（S，E）-4-羟基-3,5,5-三甲基-4-（3-氧代丁-1-烯-1-基）环己-2-烯酮	Terpenoids	萜类	-	-	39763-33-2	-	1800	7118.39	3463.9	5856.8	19221.3	6380.36	17446.2	5416.83	3241.09	13017.3	27568.2	9282.46	62446.9	1580.08	557.466	1574.47	7885.15	3319.07	5471.43	19330.6	13381.8	10234.8	29609	21894.1	23698.7	18921.1	12870.4	14319.8	C02533	--
XMW0627	GC-MS	-	-	149	177	222.089	C12H14O4	-	Diethyl Phthalate	邻苯二甲酸二乙酯	Ester	酯	-	-	84-66-2	-	1594	68381.3	49365	110596	701413	377482	1184367	242307	173966	645598	653837	346127	1.42601e+06	5959.08	3109.25	3522.57	410416	244324	378974	470148	438895	374835	810948	557303	670961	481114	518176	451522	C14175	--
XMW1017	GC-MS	-	-	67	82	220.219	C16H28	-	1,E-11,Z-13-Hexadecatriene	Z-13-十六碳三烯-E-11-1	Hydrocarbons	烃类	-	-	80634-97-5	-	1618	89887.9	133824	119578	1.38827e+06	619723	1.1216e+06	562956	591290	739188	2.5466e+06	1.60849e+06	2.48577e+06	29527.9	20112.9	51551.2	3.07697e+06	3.12106e+06	5.58719e+06	2.16949e+06	4.40901e+06	3.25795e+06	2.10948e+06	4.46268e+06	6.18617e+06	1.75846e+06	1.84851e+06	1.77143e+06	--	--
XMW1167	GC-MS	-	-	109	67	220.183	C15H24O	-	(1R,3E,7E,11R)-1,5,5,8-Tetramethyl-12-oxabicyclo[9.1.0]dodeca-3,7-diene	（1R，3E，7E，11R）-1,5,5,8-四甲基-12-氧杂双环[9.1.0]十二烷基-3,7-二烯	Terpenoids	萜类	-	-	19888-34-7	-	1606	46004.9	48937.4	47553.5	594160	228179	326483	334036	247665	346405	827981	540007	1.13592e+06	8782.69	9897.3	38572.1	1.12168e+06	1.01884e+06	2.08164e+06	1.39703e+06	1.98845e+06	2.01119e+06	1.49386e+06	1.53576e+06	2.05854e+06	828048	897370	942237	--	--
D337	GC-MS	-	-	205	220	220.183	C15H24O	-	2H-2a,7-Methanoazuleno[5,6-b]oxirene, octahydro-3,6,6,7a-tetramethyl-	α-雪松烯环氧化物	Terpenoids	萜类	-	-	29597-36-2	-	1585	14714.1	12668	9563.65	66318	26606.9	63795.2	26788.9	23330.3	43694.3	137245	90703.8	195454	9	9	2707.42	105865	87134.8	170453	88031.7	152419	111506	115147	184263	227718	86747.9	82752.1	80916.4	--	--
XMW0054	GC-MS	-	-	41	119	220.183	C15H24O	-	Farnesene epoxide, E-	E-法呢烯环氧化物	Terpenoids	萜类	-	-	83637-40-5	-	1624	42433.7	49715.8	54033.1	726437	303655	588020	273058	326651	391800	2.66555e+06	1.16075e+06	1.74998e+06	12127.6	14702.7	29459.8	1.92035e+06	1.98041e+06	3.4987e+06	1.30351e+06	2.77121e+06	1.99101e+06	1.30656e+06	2.96818e+06	3.86858e+06	1.0941e+06	1.1789e+06	1.1134e+06	--	--
XMW1180	GC-MS	-	-	118	105	220.183	C15H24O	-	(1R,1aR,2aS,5R,6R,6aS,7aS)-1,6,6a-trimethyldecahydro-1,2a-methanocyclopropa[b]naphthalen-5-ol	（1R，1aR，2aS，5R，6R，6aS，7aS）-1,6,6a-三甲基十氢-1,2-a-甲基环丙烷[b]萘-5-醇	Terpenoids	萜类	-	-	860769-47-7	-	1431	2.44532e+07	6.47149e+06	2.20391e+07	25254.7	73643.7	47044.3	8798.87	20272.1	65576.4	23818.2	72906.8	67544.4	1.01339e+07	4.3525e+06	1.35122e+07	47222.8	19488.4	21037.1	24380.8	19892.7	30367.9	25130.5	6710.77	7827	4.25127e+06	2.98762e+06	3.0315e+06	--	--
D177	GC-MS	-	-	110	95	220.183	C15H24O	-	(1aR,1bS,2aS,5S,5aS,7aS)-2,2,5,7a-Tetramethyldecahydrocyclopenta[2',3']cyclobuta[1',2':3,4]benzo[1,2-b]oxirene	（1aR，1bS，2aS，5S，5aS，7aS）-2,2,2,5,7a-四甲基十氢环戊[2'，3']环丁[1'，2'：3,4]苯并[1,2-b]环氧乙烷	Terpenoids	萜类	-	-	104188-24-1	-	1549	11463.3	21153.1	11732.2	36006.6	60610.9	36870.3	23556.5	51924.4	25036.8	59942.5	115780	60186.1	4093.42	2678.02	19633.1	54272.2	31595.9	58028.5	73190.7	36334	51540.1	63437.3	55487.8	68205.2	48383.2	42182.3	38409	--	--
w05	GC-MS	-	-	69	41	220.183	C15H24O	-	2,6,10-Dodecatrienal, 3,7,11-trimethyl-	3,7,11-三甲基-2,6,10-十二烷基	Terpenoids	萜类	-	-	19317-11-4	-	1656	10500	5226.13	10552.2	163756	47727.4	198013	66613.2	30338.4	91458.3	272292	193468	521464	9	9	9	9	9	21649.5	93873.6	94464	60530	117167	214551	117685	164641	138197	132440	C03461	ko00900,ko00909,ko01110
XMW0288	GC-MS	-	-	136	121	220.183	C15H24O	-	Cyclopenta[c]pentalen-3(3aH)-one, octahydro-1,2,3a,6-tetramethyl-	八氢-1,2,3a，6-四甲基-环戊[c]戊烯-3（3aH）-酮	Ketone	酮	-	-	120052-69-9	-	1564	8938.29	58940.1	4146.69	23819.4	96436.3	28447.5	13292.7	85169.5	18655.7	53464.9	238214	41206	3648.98	2987.58	3515.88	67294.2	24798.9	23590.6	36714	26663	30333.6	45650.3	62576	56663	49268.9	36491.9	31837.4	--	--
NMW0319	GC-MS	-	-	69	41	220.183	C15H24O	-	2,6,10-Dodecatrienal, 3,7,11-trimethyl-, (E,E)-	（E，E）-3,7,11-三甲基-2,6,10-十二烷基	Hydrocarbons	烃类	-	-	502-67-0	-	1737	198164	76123	99502.1	2.06112e+06	960414	1.91684e+06	1.26222e+06	1.02541e+06	1.68232e+06	1.76815e+06	2.17762e+06	5.54138e+06	25064.5	12605	84359.9	2.00516e+06	891045	1.70624e+06	2.86773e+06	2.43263e+06	2.09596e+06	1.45117e+06	1.45774e+06	1.91115e+06	2.81293e+06	3.08886e+06	3.06786e+06	C03461	ko00900,ko00909,ko01110
XMW0050	GC-MS	-	-	119	91	220.183	C15H24O	-	Isospathulenol	异芦丁烯醇	Terpenoids	萜类	-	-	88395-46-4	-	1638	30491	56383	29263	9526.92	171532	61505	13026	184832	33093	9	438602	90823	26091	43901	52215	21089	6128.88	31287	51533	66305	99104	15731.7	9	90815	55343	48820	52584	--	--
KMW0636	GC-MS	-	-	95	41	220.183	C15H24O	-	1H-3a,7-Methanoazulen-5-ol, octahydro-3,8,8-trimethyl-6-methylene-	雪松醇	Alcohol	醇	-	-	28231-03-0	-	1610	65128.6	71880.4	75147.3	596755	271904	442451	343017	272350	457970	910434	609710	1.36806e+06	14324.2	11832.8	63067.6	1.03924e+06	895819	1.81498e+06	1.43233e+06	1.90067e+06	1.93651e+06	1.59582e+06	1.48233e+06	2.05376e+06	775728	855614	902133	--	--
XMW1177	GC-MS	-	-	136	69	220.183	C15H24O	-	11,11-Dimethyl-4,8-dimethylenebicyclo[7.2.0]undecan-3-ol	11,11-二甲基-4,8-​​二亚甲基双环[7.2.0]十一碳三醇	Alcohol	醇	-	-	79580-01-1	-	1646	82401.7	59791.3	69780.3	187430	127019	285187	99545.2	95362.9	209587	395820	237887	651164	15230.9	7343.45	19284.2	191454	157019	151375	222565	300453	193443	278027	320498	271548	213822	218465	213519	--	--
D318	GC-MS	-	-	177	107	220.183	C15H24O	-	.beta.-Oplopenone	β-奥普拉酮	Terpenoids	萜类	-	-	28305-60-4	-	1606	116067	71435.3	148912	1.0464e+06	398601	1.245e+06	384524	190088	1.00184e+06	812116	423563	1.12166e+06	14158.3	10984.6	43957.4	514135	371098	664503	624569	745303	648432	898377	745726	977602	664003	675950	640073	--	--
D428	GC-MS	-	-	119	91	220.183	C15H24O	-	6-Methyl-2-(4-methylcyclohex-3-en-1-yl)hepta-1,5-dien-4-ol	6-甲基-2-（4-甲基环己-3-烯-1-基）庚-1,5-二烯-4-醇	Terpenoids	萜类	-	-	38142-56-2	-	1608	260795	201753	245721	1.19094e+06	580120	1.01642e+06	733147	616140	1.04218e+06	1.57086e+06	1.15051e+06	2.8764e+06	51031.6	38930	248265	2.09794e+06	1.52477e+06	3.06099e+06	2.88021e+06	3.45302e+06	3.36334e+06	3.24504e+06	2.66988e+06	3.65014e+06	1.50335e+06	1.80736e+06	1.78142e+06	--	--
XMW1035	GC-MS	-	-	205	41	220.183	C15H24O	-	(-)-Spathulenol	（-）-芦丁烯醇	Terpenoids	萜类	-	-	77171-55-2	-	1577	1954.87	9	9	23707.6	10752.2	51589.6	37344.4	29289.4	82401.8	75375	58205.2	151401	9	9	2471.67	15295.9	7023.94	17653.8	36787	25895.4	81107.7	50832.7	43268.1	49093.2	34842.7	30900.9	27927.8	--	--
D419	GC-MS	-	-	94	122	220.183	C15H24O	-	2-Penten-1-ol, 2-methyl-5-(2-methyl-3-methylenebicyclo[2.2.1]hept-2-yl)-, [1S-[1.alpha.,2.alpha.(E),4.alpha.]]-	反β-檀香醇	Terpenoids	萜类	-	-	37172-32-0	-	1741	141143	43909.6	57422.4	1.46367e+06	635698	1.33301e+06	908454	738137	1.20088e+06	1.26936e+06	1.55932e+06	4.09336e+06	22800.6	9167.47	35847.2	1.30123e+06	606238	1.25321e+06	1.9806e+06	1.71173e+06	1.55229e+06	999974	1.04937e+06	1.34242e+06	1.99396e+06	2.12244e+06	2.10184e+06	--	--
WMW0022	GC-MS	-	-	123	81	220.183	C15H24O	-	Salvial-4(14)-en-1-one	丹参酮	Terpenoids	萜类	-	-	73809-82-2	-	1595	174775	115935	281346	1.82972e+06	955123	3.12428e+06	648813	469397	1.71725e+06	1.79109e+06	983858	3.78084e+06	12373.6	5625.09	10431.6	1.06607e+06	634910	1.01066e+06	1.19552e+06	1.13922e+06	991369	2.14462e+06	1.50062e+06	1.79311e+06	1.27146e+06	1.40097e+06	1.20718e+06	--	--
D254	GC-MS	-	-	164	41	220.183	C15H24O	-	2H-2,4a-Methanonaphthalen-8(5H)-one, 1,3,4,6,7,8a-hexahydro-1,1,5,5-tetramethyl-	1，1,3,4,6,7,8a-六氢-1,1,5,5-四甲基-2H-2,4a-甲烷萘-8（5H）酮	Terpenoids	萜类	-	-	23787-90-8	-	1613	35634.1	30869.7	40803.6	399302	149052	331357	140539	125696	228396	570939	289534	724708	6480.43	6830.28	6351.12	961461	974041	1.67494e+06	737503	1.36637e+06	964319	690419	1.27906e+06	1.79123e+06	458213	522884	496851	--	--
XMW0203	GC-MS	-	-	220	205	220.146	C14H20O2	-	2,5-di-tert-Butyl-1,4-benzoquinone	1,5-二叔丁基-1,4-苯醌	Aromatics	芳烃	-	-	2460-77-7	-	1602	17561.6	21186.1	27848.3	169350	102342	288556	56980.8	42207.5	155390	155749	97306.7	346458	1135.2	480.314	919.045	100308	58140.5	91579.6	113149	106263	90103.6	201381	135005	167913	115002	128297	108285	--	--
XMW0479	GC-MS	-	-	121	120	220.11	C13H16O3	-	cis-3-Hexenyl salicylate	顺-3-己烯基水杨酸酯	Ester	酯	-	-	65405-77-8	-	1670	221857	246381	171779	3.3103e+06	2.24352e+06	3.55397e+06	2.08773e+06	1.98029e+06	2.22027e+06	2.33578e+06	4.11444e+06	5.46631e+06	34532.9	23632.9	45598.1	2.00842e+06	1.34644e+06	2.5618e+06	2.42011e+06	2.37022e+06	2.43832e+06	1.21358e+06	1.15335e+06	1.64847e+06	2.75826e+06	3.03296e+06	2.89353e+06	--	--
XMW1421	GC-MS	-	-	91	57	220.11	C13H16O3	-	3,4-Hexanedione, 1-(phenylmethoxy)-	1-（苯甲氧基）-3,4-己二酮	Ketone	酮	-	-	118006-73-8	-	1738	930557	278067	556906	9.03319e+06	3.89083e+06	8.21779e+06	5.59519e+06	4.4961e+06	7.4557e+06	7.70782e+06	9.50582e+06	2.49156e+07	214753	48381.3	334941	8.88569e+06	3.6774e+06	9.34304e+06	1.30824e+07	1.04853e+07	1.13686e+07	6.18242e+06	6.08943e+06	9.47921e+06	1.27817e+07	1.34869e+07	1.33661e+07	--	--
NMW0247	GC-MS	-	-	69	81	218.167	C15H22O	-	Furan, 3-(4,8-dimethyl-3,7-nonadienyl)-, (E)-	（E）-3-（4,8-二甲基-3,7-壬二烯基）-呋喃	Terpenoids	萜类	-	-	23262-34-2	-	1574	11322.8	16265	5350.21	28426	40585	47499.6	24574.8	30522.3	56060.4	426900	105386	216468	5057.27	4962.23	4514.63	49117	22203.3	40033.5	94904.7	139293	113780	222273	509612	226184	97262.3	78732	74650.9	C16779	--
NMW0308	GC-MS	-	-	93	55	218.167	C15H22O	-	2,6,9,11-Dodecatetraenal, 2,6,10-trimethyl-	2,6,10-三甲基-2,6,9,11-十二碳烯醛	Terpenoids	萜类	-	-	4955-32-2	-	1712	594019	146237	261186	5.76202e+06	2.51617e+06	5.31909e+06	3.58988e+06	2.89644e+06	4.79715e+06	5.17144e+06	6.24888e+06	1.65874e+07	55292.5	12935.6	64488.4	5.28334e+06	2.02829e+06	4.62926e+06	8.22624e+06	6.58941e+06	6.09634e+06	4.16743e+06	3.89269e+06	5.4063e+06	8.15877e+06	8.63201e+06	8.58123e+06	C09729	--
XMW0754	GC-MS	-	-	135	107	218.167	C15H22O	-	Methanol, (cyclohexyl)(2,3-dimethylphenyl)-	（环己基）（2,3-二甲基苯基）-甲醇	Alcohol	醇	-	-	349498-47-1	-	1842	9	33566	9	95067.4	35798.1	85657	44496.8	39771.2	73801.7	143827	104958	373785	764223	710444	840534	72252	34946.6	54412.8	128291	109629	91598.7	189036	125280	154206	389869	293170	299322	--	--
XMW1000	GC-MS	-	-	93	121	218.167	C15H22O	-	(E)-5-((1R,3R,6S)-2,3-Dimethyltricyclo[2.2.1.02,6]heptan-3-yl)-2-methylpent-2-enal	（E）-5-（（（1R，3R，6S）-2,3-二甲基三环[2.2.1.02,6]庚基-3-基）-2-甲基-戊-2-烯	Terpenoids	萜类	-	-	19903-70-9	-	1679	337687	147340	330711	5381961	2.79645e+06	6181941	2576896	2356708	3330893	2.90476e+06	4392499	8.49891e+06	53533.1	36651.7	45621.3	3380453	2086731	3404983	4766798	3869549	3686291	2158399	1941937	2825150	4302991	5215353	5148510	--	--
D438	GC-MS	-	-	69	41	218.167	C15H22O	-	Sesquirosefuran	倍半乳糖呋喃	Heterocyclic compound	杂环化合物	-	-	39007-93-7	-	1557	46913.5	55478.8	13314.3	50463.6	71771.1	56329.1	42131.2	60472.2	85720.7	1.35052e+06	347764	683051	2252.23	2773.03	1849.58	28300.5	41433.6	37038.3	79357.1	432657	91572.5	567191	1.41095e+06	495290	301882	268719	253510	--	--
D325	GC-MS	-	-	121	93	218.167	C15H22O	-	(3R,3aR,7S,8aS)-3,6,8,8-Tetramethyl-4,7,8,8a-tetrahydro-1H-3a,7-methanoazulen-2(3H)-one	（3R，3aR，7S，8aS）-3,6,8,8-四甲基-4,7,8,8a-四氢-1H-3a，7-甲基氮杂烯-2(3H)-酮	Terpenoids	萜类	-	-	288249-25-2	-	1640	41570.7	78499.7	41966.4	11911.5	229570	64133.3	27484.5	276225	28777.9	62090	903064	171620	163995	277192	280792	81501.6	31760.2	80196.5	153830	139170	209726	128559	148050	169335	224701	170092	162007	--	--
XMW1022	GC-MS	-	-	107	135	218.167	C15H22O	-	3,7-Cyclodecadien-1-one, 3,7-dimethyl-10-(1-methylethylidene)-, (E,E)-	（E，E）-3,7-二甲基-10-（1-甲基亚乙基）-3,7-环十二烷基-1-酮	Terpenoids	萜类	-	-	6902-91-6	-	1694	169199	101314	126288	491238	229892	524909	345842	247749	421599	691428	525833	1.55079e+06	16472.7	10866.8	25611.9	497236	449180	626417	503097	675322	464969	674252	673978	743979	526247	465721	435593	C16966	--
XMW0205	GC-MS	-	-	218	219	218.084	C15H10N2	-	Benzimidazo[2,1-a]isoquinoline	苯并咪唑[2,1-a]异喹啉	Heterocyclic compound	杂环化合物	-	-	239-44-1	-	1835	5833.33	9620.58	6057.61	40133.3	21844.1	44031.2	22467.3	23025.3	37624.3	65583.6	49374.9	120225	11007.1	10622.9	15218.8	21634.1	12827.4	17484.1	53880.2	40728.2	42378.4	82618.5	57578.2	60088.8	45168	47395.1	46591.1	--	--
XMW0617	GC-MS	-	-	71	56	216.173	C12H24O3	-	Propanoic acid, 2-methyl-, 3-hydroxy-2,2,4-trimethylpentyl ester	2,2,4-三甲基戊烷-1,3-二醇单异丁酸酯	Ester	酯	-	-	77-68-9	-	1374	7739.29	131036	34185.7	5362.25	109983	8811.85	6598.55	142957	9426.45	17824.6	341633	17358.6	4422.88	4069.71	3336.85	4741.61	5932.31	5140.93	7533.86	9954.68	10039.5	7078.39	5390.88	6600.48	51459.1	37842.9	35466.7	--	--
w44	GC-MS	-	-	71	41	216.136	C11H20O4	-	Butanoic acid, 2-butoxy-1-methyl-2-oxoethyl ester	丁酸2-丁氧基-1-甲基-2-氧乙酯	Ester	酯	-	-	7492-70-8	-	1356	4463.54	2896.99	18032	92816.5	24409.3	78254.3	45788.7	14466.1	19995.7	35148.7	11614.9	23349.3	3513.61	6224.1	12341.7	1.31457e+06	1.86944e+06	1.26464e+06	214624	362092	169181	207513	414386	269980	171214	137972	136890	--	--
w42	GC-MS	-	-	57	41	214.23	C14H30O	-	2-Ethyl-1-dodecanol	2-乙基-1-十二烷醇	Alcohol	醇	-	-	19780-33-7	-	1591	3911.19	2949.33	6442.29	46006.6	24227.1	72886.2	14255.2	12343.4	41096.5	43819.6	27310.2	83080.7	9	972.811	1142.89	25007	16158.3	21559.1	30631.1	28604.5	28643.8	55127.8	39346.8	41497.6	32370.9	34708.4	28294.1	--	--
KMW0726	GC-MS	-	-	55	69	214.23	C14H30O	-	1-Tetradecanol	十四醇	Alcohol	醇	-	-	112-72-1	-	1676	137631	60316.6	108716	2.13833e+06	1.09273e+06	2.56121e+06	1.06059e+06	763556	1.36235e+06	1.15325e+06	1.30348e+06	3.42663e+06	16976.5	11973.9	13279.8	1.5245e+06	997701	1.60447e+06	2.02029e+06	1.78888e+06	1.53658e+06	908966	945706	1.29806e+06	1.83815e+06	2.30123e+06	2.30094e+06	--	--
XMW1099	GC-MS	-	-	99	117	214.193	C13H26O2	-	Hexanoic acid, 1-methylhexyl ester	1-甲基己酯-己酸	Ester	酯	-	-	6624-58-4	-	1417	8247.63	15248.2	47362.3	8253.31	21413.5	10220	9537.3	24986.4	8702.95	14451.7	65518	13784.1	10591.3	8671.34	15163.3	17300.6	11199.4	9585.69	15351.3	13132.9	13752	21330.1	18872.4	18574.3	21292.2	16380.6	15181.5	--	--
XMW1253	GC-MS	-	-	71	41	214.193	C13H26O2	-	Butanoic acid, 1-methyloctyl ester	1-甲基辛酯-丁酸	Ester	酯	-	-	69727-42-0	-	1417	88986.8	1.57861e+06	294614	179188	2.2166e+06	188240	152974	2.7656e+06	236133	613369	6.8408e+06	838173	69845.4	57235.3	104320	197128	97072.7	83655.3	551957	331033	400873	568067	360372	430384	1.83261e+06	1.40391e+06	1.40327e+06	--	--
D204	GC-MS	-	-	70	145	214.193	C13H26O2	-	Pentyl octanoate	辛酸戊酯	Ester	酯	-	-	638-25-5	-	1484	81075.9	96200.7	66892.4	163108	128665	181409	233178	164302	152833	3.38958e+07	2.01737e+07	2.07284e+07	38800.8	27439.9	29451.7	213095	156476	197750	695379	3.06163e+06	5.27726e+06	1.80898e+07	2.11083e+07	1.40714e+07	9.5324e+06	7.34733e+06	6.5857e+06	C04780	ko00592,ko01100,ko01110
XMW1345	GC-MS	-	-	70	127	214.193	C13H26O2	-	Octanoic acid, 3-methylbutyl ester	3-甲基丁酯辛酸	Ester	酯	-	-	2035-99-6	-	1446	100166	175867	88169.6	1.68849e+06	590315	568793	884534	909012	821041	4.99242e+06	2.61535e+06	2.2545e+06	31639.4	31735.4	59265.3	2.39051e+06	2.10442e+06	2.35652e+06	4.71175e+06	5.59822e+06	6.90567e+06	3.10843e+06	5.03226e+06	7.04168e+06	3.37144e+06	2.66596e+06	2.55755e+06	--	--
XMW1242	GC-MS	-	-	99	71	214.157	C12H22O3	-	Hexanoic acid, anhydride	己酸己酯	Ester	酯	-	-	2051-49-2	-	1517	255221	236147	345019	23313.5	13810.7	21430.2	13147.2	11463	33910.2	78069.1	54597.8	74067.7	148227	269339	1.4783e+06	27480.8	13378.1	47773.7	36676.3	40464.8	42691.6	65021.3	98253.6	300298	182364	185379	177592	--	--
XMW0419	GC-MS	-	-	57	71	212.25	C15H32	-	Tetradecane, 2-methyl-	二甲基十六烷	Hydrocarbons	烃类	-	-	1560-95-8	-	1463	26984.5	29872.5	25649.1	107879	53999.2	114584	79525.7	81018.4	146323	383517	223440	464206	2634.11	1479.51	787.471	40749.3	17242.2	22482.8	228531	117009	158795	195372	121397	132235	164545	136940	124602	--	--
XMW0200	GC-MS	-	-	71	57	212.25	C15H32	-	Tetradecane, 4-methyl-	四甲基十四烷	Hydrocarbons	烃类	-	-	25117-24-2	-	1459	26435.7	29999.6	24368.4	100796	47948.2	106567	76481.7	76482.9	139770	370104	211368	444727	2406.26	1547.76	2263.57	32477	18397.8	19766.7	208729	105551	150254	186571	124228	126098	154377	130286	115368	--	--
D399	GC-MS	-	-	55	82	212.214	C14H28O	-	cis-9-Tetradecen-1-ol	豆蔻醇	Alcohol	醇	-	-	35153-15-2	-	1666	132904	58806.6	106528	2.23505e+06	1.08438e+06	2.56033e+06	1.04689e+06	778562	1.3559e+06	1.15325e+06	1.29334e+06	3.38764e+06	17208.3	15369.2	15724.6	1.55647e+06	991651	1.75146e+06	2.00621e+06	1.77658e+06	1.68314e+06	937698	962990	1.39701e+06	1.82181e+06	2.28638e+06	2.2808e+06	--	--
KMW0640	GC-MS	-	-	57	82	212.214	C14H28O	-	Tetradecanal	十四烷基醛	Aldehyde	醛	-	-	124-25-4	-	1613	8810.99	8532.12	6763.59	39667.4	19298.4	32722.4	27188	24648.7	33735.6	71991.6	53142.8	121084	9	9	7590.16	71255	53720.1	109034	109549	130596	135576	138342	124915	148385	57352.3	63405.8	64044.5	--	--
D382	GC-MS	-	-	55	82	212.214	C14H28O	-	Myristoleyl Alcohol	麦里斯托利醇	Alcohol	醇	-	-	34010-15-6	-	1678	137631	60626	109459	2.21772e+06	1.1011e+06	2.57814e+06	1.0673e+06	778409	1.38958e+06	1.16096e+06	1.30964e+06	3.49322e+06	17390.6	11973.9	14372.4	1.53795e+06	1.00494e+06	1.55205e+06	2.03553e+06	1.80413e+06	1.5447e+06	933958	966012	1.17663e+06	1.85476e+06	2.32065e+06	2.3206e+06	--	--
WMW0130	GC-MS	-	-	41	55	210.235	C15H30	-	1-Pentadecene	1-十五碳烯	Hydrocarbons	烃类	-	-	13360-61-7	-	1492	47200.9	50922.5	62423.4	162069	121069	171527	153536	194205	255677	524619	495719	538833	18870.5	27003.5	149061	68259.7	33972.4	34050.3	364597	220847	330622	265710	170931	243925	228364	205468	186151	--	--
XMW0062	GC-MS	-	-	109	69	210.162	C13H22O2	-	2-Propenoic acid, 2-methyl-, 3,3,5-trimethylcyclohexyl ester	甲基丙烯酸 3,3,5-三甲基环己酯	Ester	酯	-	-	7779-31-9	-	1353	9	9	9	50969.3	26669.7	41021.8	56633.1	65348.9	51453.6	72804.7	41482.6	76479.5	9	9	9	236015	333027	214098	88883.7	89260.7	68001.8	74667.9	96044.6	78961.6	59252.6	52872.3	51405.4	--	--
D354	GC-MS	-	-	136	79	210.162	C13H22O2	-	3-Cyclohexene-1-carboxAldehyde, 4-(4-hydroxy-4-methylpentyl)-	4-（4-羟基-4-甲基戊基）-3-环己烯-1-甲醛	Aldehyde	醛	-	-	31906-04-4	-	1687	161063	106015	118679	2.60445e+06	1.05132e+06	1.67721e+06	1.10077e+06	918571	1.04359e+06	1.72133e+06	1.68658e+06	2.66078e+06	49074.2	43264.5	48313	4.61918e+06	4.0456e+06	9.76458e+06	3.53192e+06	7.15791e+06	4.87563e+06	1.40873e+06	3.64401e+06	5.86894e+06	3.59877e+06	3.86563e+06	4.16405e+06	--	--
XMW1113	GC-MS	-	-	99	55	210.118	C9H20FO2P	-	2-Octyl methylphosphonofluoridate	2-辛基甲基氟膦酸酯	Ester	酯	-	-	22925-97-9	-	1306	72211.9	74607.5	47591.1	31397.3	25000.1	24238.3	13624.2	17677.4	15626.6	70100.5	62486.5	118961	41752.7	29288	78837.9	55059.7	63271.5	56635	134187	125270	104043	123936	93891.1	215741	62111	55277.7	62965.2	--	--
XMW0133	GC-MS	-	-	123	124	208.146	C13H20O2	-	6-Methyl-6-(5-methylfuran-2-yl)heptan-2-one	6-甲基-6-（5-甲基呋喃-2-基）庚烷-2-酮	Ketone	酮	-	-	50464-95-4	-	1433	328457	300228	203851	100328	159464	127826	33121.6	49872	15106.3	28028.2	134172	62473.8	554931	2.01692e+06	658371	378757	122153	108101	162152	23146.3	47872.8	117249	16103	146891	424786	321812	302311	--	--
KMW0639	GC-MS	-	-	123	41	208.146	C13H20O2	-	3-Buten-2-one, 4-(2,2,6-trimethyl-7-oxabicyclo[4.1.0]hept-1-yl)-	环氧-β-紫罗兰酮	Terpenoids	萜类	-	-	23267-57-4	-	1473	94463.9	120307	62452.9	68875.8	56282.6	71271	96215.3	72160.6	67131.2	1.846e+07	1.14848e+07	1.21526e+07	45253.1	27693.6	55942.8	96096.8	58840.6	85778.4	3.49183e+06	1.38636e+06	2.23818e+06	1.16005e+07	1.60667e+07	7.40598e+06	4.6102e+06	3.4755e+06	3.10822e+06	--	--
NMW0258	GC-MS	-	-	121	150	207.126	C12H17NO2	-	Fenobucarb	异丁威	Ester	酯	-	-	3766-81-2	-	1608	92361.3	91308.2	100353	768560	318097	595386	461758	344245	598788	1.04795e+06	743575	1.80173e+06	18547.1	16122.7	84127.3	1.22723e+06	1.01061e+06	2.03734e+06	1.72092e+06	2.19611e+06	2.20172e+06	1.8967e+06	1.71277e+06	2.37481e+06	998719	1.07315e+06	1.07877e+06	C14425	--
XMW1336	GC-MS	-	-	91	92	207.09	C11H13NO3	-	N-Benzyloxy-2-carbomethoxyaziridine	1-苯基甲氧基氮丙啶-2-羧酸甲酯	Ester	酯	-	-	53084-33-6	-	1550	1.55143e+06	6.37608e+06	1.29999e+06	4.06884e+06	9.935e+06	4.36614e+06	3.30332e+06	1.00902e+07	4.73725e+06	1.26563e+07	2.79374e+07	1.37567e+07	306877	314407	342625	1.87136e+06	833993	1.14274e+06	8.84468e+06	4.62228e+06	7.20625e+06	7.05859e+06	4.24999e+06	5.81397e+06	8.05088e+06	5.87872e+06	5.2759e+06	--	--
XMW0195	GC-MS	-	-	41	67	206.203	C15H26	-	1H-Cycloprop[e]azulene, decahydro-1,1,4,7-tetramethyl-, [1aR-(1a.alpha.,4.beta.,4a.beta.,7.beta.,7a.beta.,7b.alpha.)]-	十氢-1,1,4,7-四甲基-1H-环丙烯腈	Terpenoids	萜类	-	-	28580-43-0	-	1373	30360.5	1.66332e+06	29036.6	50946	1.46657e+06	67409.9	37090.6	1.86994e+06	86277.2	218646	4.40201e+06	242537	4068.53	3950.9	7613.87	11845.4	9	9	81272.5	48971.5	78820.7	96205.8	53276.7	61140.2	668890	495695	477390	--	--
XMW1364	GC-MS	-	-	135	93	206.203	C15H26	-	7-Octylidenebicyclo[4.1.0]heptane	7-辛二烯双环[4.1.0]庚烷	Terpenoids	萜类	-	-	82253-11-0	-	1522	1.05496e+06	1.50767e+06	869523	2.57871e+06	3.23272e+06	2.35131e+06	2.47711e+06	5.12498e+06	3.19476e+06	1.50444e+07	1.5493e+07	1.27523e+07	405034	246333	614082	1.14662e+06	601174	776052	8.11028e+06	5.43295e+06	7.34169e+06	8.24373e+06	8.38761e+06	6.93528e+06	6.61895e+06	5.00125e+06	4.56986e+06	--	--
D216	GC-MS	-	-	121	93	206.167	C14H22O	-	.alpha.-Irone	甲基Α-紫罗兰酮	Ketone	酮	-	-	79-69-6	-	1526	8.04996e+06	1.09194e+07	7.19706e+06	2.94449e+07	1.71309e+07	2.45732e+07	3.0892e+07	3.7018e+07	3.67886e+07	1.0006e+08	8.49145e+07	1.20253e+08	3.6767e+06	2.90944e+06	6.67746e+06	1.54619e+07	6.24022e+06	9.09495e+06	1.01935e+08	5.67469e+07	8.45262e+07	8.69104e+07	6.32459e+07	7.15336e+07	6.4311e+07	4.73855e+07	4.29314e+07	C09690	--
D352	GC-MS	-	-	107	123	206.167	C14H22O	-	2-Butenal, 2-methyl-4-(2,6,6-trimethyl-1-cyclohexen-1-yl)-	2-甲基-4-（2,6,6-三甲基-1-环己烯-1-基）-2-丁烯醛	Aldehyde	醛	-	-	3155-71-3	-	1584	69686.7	62838.2	61851.7	521017	172587	369552	196752	203779	238200	2.25152e+06	1.48984e+06	1.68823e+06	41307.9	27154.4	29269	541907	452447	846618	523042	862977	718731	1.00393e+06	1.64039e+06	1.46678e+06	731066	635027	589511	--	--
XMW0473	GC-MS	-	-	105	123	206.131	C13H18O2	-	Benzoic acid, hexyl ester	苯甲酸己酯	Ester	酯	-	-	6789-88-4	-	1580	71696	124519	52432.1	308055	190383	320167	102889	136583	173939	1.21667e+06	1.01678e+06	1.29681e+06	9	9	9	447315	388068	719131	353684	654060	515989	804534	1.4863e+06	1.21484e+06	562469	500202	470546	--	--
[truncated: 675 more rows]
