# Supplementary material for: Metabolomics Analysis Reveals the Differences Between Bupleurum chinense DC. and Bupleurum scorzonerifolium Willd.
Source: Frontiers journal article supplement (doi:10.3389/fpls.2022.933849), 2022-07-13
Supplement: Table_2.XLSX [file Table_2.XLSX]

## Sheet: Sheet1
Index	Platform	Formula	Compounds	物质	Class I	物质一级分类	Class II	物质二级分类	CAS	BcR1	BcR2	BcR3	BsR1	BsR2	BsR3	VIP	p_value	FDR	Fold_Change	Log2FC	Type
pme3033	UPLC-MS/MS	C4H9NO2	N,N-Dimethylglycine	N,N-二甲基甘氨酸	Amino acids and derivatives	氨基酸及其衍生物	Amino acids and derivatives	氨基酸及其衍生物	1118-68-9	2823300	1308900	4304300	1201600	1051400	1497900	1.01387	0.210487	0.442149	0.444604	-1.16941	down
Lmbn000193	UPLC-MS/MS	C3H4O4	Tartronate semialdehyde	羟基丙二酸半醛	Organic acids	有机酸	Organic acids	有机酸	2480-77-5	6171600	6391500	6303400	312260	241440	473060	1.4471	3.91782e-07	0.000678958	0.0544224	-4.19966	down
ML10172161	UPLC-MS/MS	C3H4O4	Hydroxypyruvic acid	羟基丙酮酸	Organic acids	有机酸	Organic acids	有机酸	1113-60-6	8083500	9065900	8410200	457720	343650	624810	1.45003	0.000610616	0.0495291	0.0557982	-4.16364	down
mws0576	UPLC-MS/MS	C4H8O3	3-Hydroxybutyric acid	3-羟基丁酸	Organic acids	有机酸	Organic acids	有机酸	300-85-6	41316000	45844000	41328000	3186500	2755000	4599200	1.44894	0.000443796	0.0488722	0.0820365	-3.60759	down
pme1975	UPLC-MS/MS	C3H4O4	Malonic acid	丙二酸	Organic acids	有机酸	Organic acids	有机酸	141-82-2	33789000	38126000	32601000	2352600	1824700	4015200	1.43499	0.000861528	0.0561511	0.0783851	-3.67328	down
MWS2076	UPLC-MS/MS	C6H7NO	2-Aminophenol	2-氨基苯酚	Alkaloids	生物碱	Alkaloids	生物碱	95-55-6	7209.5	2925.6	5035.4	3633.2	1639.5	1568.7	1.07696	0.140588	0.36821	0.450967	-1.14891	down
mws0491	UPLC-MS/MS	C8H11N	Phenethylamine	2-苯乙胺	Alkaloids	生物碱	Alkaloids	生物碱	64-04-0	57654	53674	48118	6262.9	9	9	1.22641	0.000195815	0.0407197	0.039392	-4.66595	down
MWSmce706	UPLC-MS/MS	C5H8N2O2	Cyclo(Ala-Gly)	环(甘氨酰-L-丙氨酰)	Amino acids and derivatives	氨基酸及其衍生物	Amino acids and derivatives	氨基酸及其衍生物	4526-77-6	148420	128060	76560	55220	52821	42051	1.29882	0.0822499	0.301676	0.425142	-1.23398	down
MWS1926	UPLC-MS/MS	C6H13NO2	DL-Leucine	DL-亮氨酸	Amino acids and derivatives	氨基酸及其衍生物	Amino acids and derivatives	氨基酸及其衍生物	328-39-2	2380800	3352900	6731300	1649600	1404500	1528400	1.20981	0.184122	0.414932	0.367629	-1.44368	down
pme3034	UPLC-MS/MS	C5H8O4	Ethylmalonic acid	乙基丙二酸	Organic acids	有机酸	Organic acids	有机酸	601-75-2	9	9	9	11553	9	28364	1.03925	0.247565	0.471462	1478.74	10.5302	up
pme0243	UPLC-MS/MS	C5H8O4	Glutaric acid	戊二酸	Organic acids	有机酸	Organic acids	有机酸	110-94-1	139570	178400	166890	387030	303770	903440	1.25282	0.186989	0.417692	3.28804	1.71723	up
mws0275	UPLC-MS/MS	C4H6O5	L-Malic acid	L-苹果酸	Organic acids	有机酸	Organic acids	有机酸	97-67-6	3338600	3336000	4676200	8799300	5606000	8633800	1.29586	0.0477424	0.251482	2.02973	1.02129	up
mws0889	UPLC-MS/MS	C4H8O5	D-Threonic Acid	D-苏糖酸	Others	其它类	Saccharides and Alcohols	糖及醇类	3909-12-4	137950	107910	225280	299040	220960	493160	1.13213	0.14204	0.369603	2.15044	1.10463	up
pme1173	UPLC-MS/MS	C5H4N4O	Allopurinol	别嘌呤醇	Nucleotides and derivatives	核苷酸及其衍生物	Nucleotides and derivatives	核苷酸及其衍生物	315-30-0	20297	17572	19957	3716.1	5625.3	3661.2	1.43689	0.000242184	0.0418463	0.224857	-2.15292	down
pme0033	UPLC-MS/MS	C5H4N4O	Hypoxanthine	次黄嘌呤	Nucleotides and derivatives	核苷酸及其衍生物	Nucleotides and derivatives	核苷酸及其衍生物	68-94-0	29111	14065	32224	7919.7	5010.2	3211	1.32752	0.0645708	0.279246	0.21407	-2.22384	down
pma0948	UPLC-MS/MS	C8H11NO	Phenylethanolamine	苯基乙醇胺	Alkaloids	生物碱	Alkaloids	生物碱	7568-93-6	9	10066	117210	9	9	9	1.02067	0.375403	0.571388	0.000212122	-12.2028	down
pme1002	UPLC-MS/MS	C8H11NO	L-Tyramine	L-酪胺	Amino acids and derivatives	氨基酸及其衍生物	Amino acids and derivatives	氨基酸及其衍生物	51-67-2	9	16969	424930	9	9	9	1.01408	0.400083	0.577188	6.10987e-05	-13.9985	down
mws0749	UPLC-MS/MS	C7H6O3	4-Hydroxybenzoic acid	4-羟基苯甲酸	Phenolic acids	酚酸类	Phenolic acids	酚酸类	99-96-7	135430	181570	308210	52692	42581	40053	1.38641	0.0863524	0.30281	0.216449	-2.2079	down
Hmsp000364	UPLC-MS/MS	C7H13NO2	L-Cyclopentylglycine	环戊基甘氨酸	Amino acids and derivatives	氨基酸及其衍生物	Amino acids and derivatives	氨基酸及其衍生物	2521-84-8	254930	275080	184970	826740	496770	513020	1.33178	0.0655964	0.280688	2.56865	1.36101	up
pmp000966	UPLC-MS/MS	C7H13NO2	Stachydrine	水苏碱	Alkaloids	生物碱	Pyrrole alkaloids	吡咯类生物碱	471-87-4	86194	94712	109420	313740	163210	158530	1.22364	0.150363	0.3795	2.18885	1.13017	up
Rfmb320	UPLC-MS/MS	C7H13NO2	1-Methylpiperidine-2-carboxylic acid	1-甲基哌啶-2-羧酸	Amino acids and derivatives	氨基酸及其衍生物	Amino acids and derivatives	氨基酸及其衍生物	7730-87-2	105560	101850	50849	313430	130450	131280	1.02932	0.219332	0.447002	2.22707	1.15514	up
Rfmb318	UPLC-MS/MS	C7H14NO2+	D-Proline betaine	脯氨酸甜菜碱	Amino acids and derivatives	氨基酸及其衍生物	Amino acids and derivatives	氨基酸及其衍生物	1195-94-4	26318	28686	24312	146830	35383	56647	1.07226	0.259712	0.485303	3.0115	1.59048	up
mws2213	UPLC-MS/MS	C9H8O2	Cinnamic acid	肉桂酸	Phenolic acids	酚酸类	Phenolic acids	酚酸类	140-10-3	3708	7143.9	161340	2614.9	546.32	1230.7	1.0569	0.394476	0.577188	0.025506	-5.29302	down
Lmgp000796	UPLC-MS/MS	C8H7NO2	4-Hydroxymandelonitrile	4-羟基扁桃腈	Alkaloids	生物碱	Phenolamine	酚胺	13093-65-7	3674700	2407600	8664900	2594300	866960	898990	1.1175	0.205303	0.436793	0.295666	-1.75796	down
pme1210	UPLC-MS/MS	C5H11NO2S	L-Methionine	L-甲硫氨酸	Amino acids and derivatives	氨基酸及其衍生物	Amino acids and derivatives	氨基酸及其衍生物	63-68-3	3386100	1973100	7693300	2289500	774100	699560	1.10556	0.207481	0.439834	0.28831	-1.79431	down
mws0847	UPLC-MS/MS	C6H7N5	1-Methyladenine	1-甲基腺嘌呤	Nucleotides and derivatives	核苷酸及其衍生物	Nucleotides and derivatives	核苷酸及其衍生物	5142-22-3	68061	40446	154340	37868	20278	17623	1.15283	0.207608	0.439834	0.288263	-1.79454	down
pme0183	UPLC-MS/MS	C5H5N5O	Isoguanine	异鸟嘌呤	Nucleotides and derivatives	核苷酸及其衍生物	Nucleotides and derivatives	核苷酸及其衍生物	3373-53-3	143230	65342	172850	58306	45965	43268	1.19454	0.132811	0.357941	0.386813	-1.37029	down
pme2589	UPLC-MS/MS	C6H8O5	2-Oxoadipic acid	2-氧代己二酸	Organic acids	有机酸	Organic acids	有机酸	3184-35-8	9	9	9	110040	33682	179100	1.45616	0.124515	0.352589	11956.4	13.5455	up
mws1346	UPLC-MS/MS	C6H11NO4	DL-2-Aminoadipic acid	DL-2-氨基己二酸	Alkaloids	生物碱	Alkaloids	生物碱	542-32-5	125700	129220	147780	3036400	1844200	2916700	1.45415	0.0228087	0.204806	19.3626	4.2752	up
Hmqn002118	UPLC-MS/MS	C9H6O3	Umbelliferone	伞形酮	Lignans and Coumarins	木脂素和香豆素	Coumarins	香豆素	93-35-6	776360	1438700	535920	36517	15071	291560	1.20039	0.0849266	0.30281	0.124737	-3.00304	down
pme2914	UPLC-MS/MS	C6H10O5	3-Hydroxy-3-methylpentane-1,5-dioic acid	3-羟基-3-甲基谷氨酸	Amino acids and derivatives	氨基酸及其衍生物	Amino acids and derivatives	氨基酸及其衍生物	503-49-1	298020	300650	562460	13352000	528300	4132500	1.07872	0.279056	0.505863	15.5132	3.95542	up
Lmbp000123	UPLC-MS/MS	C6H13NO2S	L-Homomethionine	L-高甲硫氨酸	Amino acids and derivatives	氨基酸及其衍生物	Amino acids and derivatives	氨基酸及其衍生物	25148-30-5	8564.2	11783	48897	1211.4	721.12	2010.5	1.3238	0.23452	0.45563	0.0569437	-4.13432	down
pme1419	UPLC-MS/MS	C6H13NO2S	L-Methionine methyl ester	L-甲硫氨酸甲酯	Amino acids and derivatives	氨基酸及其衍生物	Amino acids and derivatives	氨基酸及其衍生物	10332-17-9	15218	24448	21092	9243.6	5066.7	8476.2	1.32393	0.0264182	0.213353	0.375037	-1.4149	down
pmc0274	UPLC-MS/MS	C6H6N4S	6-Methylmercaptopurine	6-甲基巯嘌呤	Nucleotides and derivatives	核苷酸及其衍生物	Nucleotides and derivatives	核苷酸及其衍生物	50-66-8	8316100	6038900	13999000	7061400	2454500	4259500	1.01568	0.167229	0.397543	0.485836	-1.04146	down
mws0344	UPLC-MS/MS	C5H10O6	D-Xylonic acid	D-木糖酸	Others	其它类	Saccharides and Alcohols	糖及醇类	526-91-0	2413400	1929400	3352100	6184700	4648300	14188000	1.22249	0.187925	0.417952	3.25163	1.70116	up
Lmrn003000	UPLC-MS/MS	C9H10O3	2-Hydroxy-3-phenylpropanoic acid	2-羟基-3-苯基丙酸	Phenolic acids	酚酸类	Phenolic acids	酚酸类	7326-19-4	1231000	1377200	1885500	2844400	3815500	2523000	1.30614	0.037682	0.242405	2.04351	1.03105	up
Lmgp002595	UPLC-MS/MS	C9H10O3	Acetovanillone	香荚兰乙酮	Phenolic acids	酚酸类	Phenolic acids	酚酸类	498-02-2	218720	272580	113660	40595	75707	25052	1.28724	0.068755	0.28342	0.233658	-2.09753	down
Lmbn005172	UPLC-MS/MS	C9H10O3	2,6-Dimethoxybenzaldehyde	2,6-二甲氧基苯甲醛	Phenolic acids	酚酸类	Phenolic acids	酚酸类	3392-97-0	461760	558840	466690	1040200	2276200	1129400	1.30811	0.130611	0.357941	2.9892	1.57976	up
MWS0274	UPLC-MS/MS	C9H10O3	DL-3-Phenyllactic acid	DL-3-苯基乳酸	Organic acids	有机酸	Organic acids	有机酸	828-01-3	209400	292760	234790	567350	1323400	589960	1.29785	0.142786	0.370341	3.36618	1.75111	up
mws0467	UPLC-MS/MS	C9H10O3	3-(4-Hydroxyphenyl)-propionic acid	3-(4-羟基苯基)丙酸	Phenolic acids	酚酸类	Phenolic acids	酚酸类	501-97-3	591290	788110	622580	1340300	3388500	1543400	1.26922	0.159417	0.386296	3.133	1.64754	up
MWSmce165	UPLC-MS/MS	C6H14O5	L-Fucitol	L-岩藻糖醇	Others	其它类	Saccharides and Alcohols	糖及醇类	13074-06-1	181480	146930	234240	500270	320560	1116000	1.21462	0.196356	0.42433	3.44234	1.78339	up
mws0851	UPLC-MS/MS	C8H15NaO2	Sodium Valproate	丙戊酸钠	Others	其它类	Others	其它	1069-66-5	440160	493230	502830	1120100	864960	1270600	1.40579	0.0331423	0.235704	2.26683	1.18067	up
pme2598	UPLC-MS/MS	C8H8O4	3,4-Dihydroxybenzeneacetic acid	3,4-二羟基苯乙酸	Phenolic acids	酚酸类	Phenolic acids	酚酸类	102-32-9	93656	41240	88119	33126	9	9	1.10967	0.0411236	0.242405	0.148618	-2.75032	down
pme3186	UPLC-MS/MS	C3H7O6P	DL-Glyceraldehyde-3-phosphate	DL-甘油醛-3-磷酸	Organic acids	有机酸	Organic acids	有机酸	591-59-3	943490	177960	624320	31280	66880	24993	1.32954	0.134666	0.359594	0.0705437	-3.82534	down
pme2550	UPLC-MS/MS	C6H6O6	Cis-Aconitic acid	顺式乌头酸	Organic acids	有机酸	Organic acids	有机酸	585-84-2	14693	8959.7	15978	6060.8	4343.9	5484.1	1.32691	0.0601804	0.274454	0.400922	-1.31861	down
mws0154	UPLC-MS/MS	C7H10O5	Shikimic acid	莽草酸	Organic acids	有机酸	Organic acids	有机酸	138-59-0	49756	18679	61204	8766.2	23900	12712	1.073	0.146646	0.374835	0.350035	-1.51443	down
pme1651	UPLC-MS/MS	C10H9NO2	Indole 3-acetic acid (IAA)	吲哚-3-乙酸	Alkaloids	生物碱	Plumerane	吲哚类生物碱	87-51-4	30000	16754	29242	12806	9735.2	14760	1.21746	0.0826541	0.302193	0.490831	-1.0267	down
MWSmce690	UPLC-MS/MS	C6H8O6	Erythorbic Acid; Isoascorbic Acid	异抗坏血酸	Others	其它类	Vitamin	维生素	89-65-6	133830	92054	78634	180270	156400	283880	1.22267	0.098874	0.318462	2.03781	1.02702	up
Lmbn001754	UPLC-MS/MS	C7H12O5	3-Isopropylmalic Acid	3-异丙基苹果酸	Organic acids	有机酸	Organic acids	有机酸	921-28-8	114620	75866	172290	712190	534770	621250	1.4027	0.00292365	0.0833265	5.14976	2.36451	up
pmb3101	UPLC-MS/MS	C7H12O5	2-Isopropylmalic Acid	2-异丙基苹果酸	Organic acids	有机酸	Organic acids	有机酸	49601-06-1	84882	61145	125420	483610	426350	435850	1.41693	0.000159598	0.0407197	4.95791	2.30973	up
Zmgn001448	UPLC-MS/MS	C7H12O5	2-Propylmalic Acid	2-丙基苹果酸	Organic acids	有机酸	Organic acids	有机酸	-	137840	78036	162190	636440	563710	567710	1.40781	0.000179167	0.0407197	4.67606	2.22529	up
mws1013	UPLC-MS/MS	C9H6O4	Esculetin	秦皮乙素	Lignans and Coumarins	木脂素和香豆素	Coumarins	香豆素	305-01-1	1928000	7675600	3627000	295720	334540	268770	1.39676	0.137404	0.364656	0.0679508	-3.87937	down
pme0516	UPLC-MS/MS	C6H12O6	Inositol	肌醇	Others	其它类	Saccharides and Alcohols	糖及醇类	87-89-8	157990	112230	104280	222620	297090	253360	1.35353	0.00963129	0.146727	2.06427	1.04563	up
mws0093	UPLC-MS/MS	C10H12O3	Coniferyl alcohol	松柏醇	Phenolic acids	酚酸类	Phenolic acids	酚酸类	458-35-5	127730	144790	271040	70791	89300	63767	1.25649	0.13883	0.366411	0.411837	-1.27986	down
mws1350	UPLC-MS/MS	C9H10O4	Syringaldehyde; 4-Hydroxy-3,5-Dimethoxybenzaldehyde	丁香醛; 4-羟基-3,5-二甲氧基苯甲醛	Phenolic acids	酚酸类	Phenolic acids	酚酸类	134-96-3	28088	40494	26362	13261	18629	12174	1.32125	0.0453532	0.24716	0.464105	-1.10748	down
pme2237	UPLC-MS/MS	C6H14O6	Dulcitol	半乳糖醇	Others	其它类	Saccharides and Alcohols	糖及醇类	608-66-2	249970	248130	107370	514920	315940	915550	1.15034	0.156458	0.384577	2.88439	1.52826	up
mws0214	UPLC-MS/MS	C6H14O6	D-Sorbitol	D-山梨糖醇	Others	其它类	Saccharides and Alcohols	糖及醇类	50-70-4	217160	179150	61243	331410	294780	829010	1.11508	0.187034	0.417692	3.1804	1.66921	up
mws1155	UPLC-MS/MS	C6H14O6	D-Mannitol	D-甘露醇	Others	其它类	Saccharides and Alcohols	糖及醇类	69-65-8	68331	71813	38371	147510	127500	245640	1.30088	0.0789808	0.297237	2.91656	1.54427	up
pme0137	UPLC-MS/MS	C7H12N2O4	N-Acetyl-L-Glutamine	N-乙酰-L-谷氨酰胺	Amino acids and derivatives	氨基酸及其衍生物	Amino acids and derivatives	氨基酸及其衍生物	2490-97-3	305520	415960	322410	1379500	1078300	845920	1.39403	0.0343427	0.237115	3.16482	1.66212	up
mws0736	UPLC-MS/MS	C8H16N2O3	N-Glycyl-L-leucine	N-甘氨酰-L-亮氨酸	Amino acids and derivatives	氨基酸及其衍生物	Amino acids and derivatives	氨基酸及其衍生物	869-19-2	293820	476860	923750	168500	30607	87602	1.23813	0.123221	0.35007	0.169207	-2.56314	down
mws5041	UPLC-MS/MS	C8H16N2O3	L-Glycyl-L-isoleucine	L-甘氨酰-L-异亮氨酸	Amino acids and derivatives	氨基酸及其衍生物	Amino acids and derivatives	氨基酸及其衍生物	19461-38-2	300960	414220	645020	144090	39123	83639	1.30506	0.0589653	0.272246	0.196186	-2.34971	down
pmp001232	UPLC-MS/MS	C12H14O2	Neoligustilide	新藁本内脂	Others	其它类	Others	其它	-	7112.2	7789.7	8601.1	9	9	9	1.46281	0.00301126	0.0833265	0.00114879	-9.76567	down
MWSmce658	UPLC-MS/MS	C10H8O4	Noreugenin; 5,7-Dihydroxy-2-Methylchromone	去甲丁香色原酮; 5,7-二羟基-2-甲基色酮	Phenolic acids	酚酸类	Phenolic acids	酚酸类	1013-69-0	99498	510010	343400	4535.2	53893	18721	1.23345	0.131983	0.357941	0.0809619	-3.62661	down
Hmcp002123	UPLC-MS/MS	C10H8O4	Isoscopoletin (6-Hydroxy-7-Methoxycoumarin)	异莨菪亭	Lignans and Coumarins	木脂素和香豆素	Coumarins	香豆素	776-86-3	64726	145820	1902100	68976	20406	24030	1.01902	0.381958	0.575559	0.0536824	-4.21941	down
Lmdn003756	UPLC-MS/MS	C10H10O4	Methyl caffeate	咖啡酸甲酯	Phenolic acids	酚酸类	Phenolic acids	酚酸类	3843-74-1	4944.7	7896.1	7841.9	9	9	9	1.46161	0.0194648	0.192586	0.00130544	-9.58125	down
mws2104	UPLC-MS/MS	C7H14O6	D-Pinitol	D-松醇	Others	其它类	Saccharides and Alcohols	糖及醇类	10284-63-6	6871.8	12029	6125.2	29140	21059	43745	1.33971	0.0650409	0.279692	3.75386	1.90837	up
pme0534	UPLC-MS/MS	C6H12O7	Gluconic acid	葡萄糖酸	Others	其它类	Saccharides and Alcohols	糖及醇类	526-95-4	900180	1538900	954200	3000400	3028100	3982900	1.38321	0.00738278	0.13611	2.95036	1.56089	up
mws4173	UPLC-MS/MS	C11H10O4	5,7-Dimethoxycoumarin (Limettin)(Citropten)	5,7-二甲氧基香豆素 (柠檬内酯)(柠檬油素)	Lignans and Coumarins	木脂素和香豆素	Coumarins	香豆素	487-06-9	243180	11153000	14289000	110650	45789	312300	1.11257	0.186953	0.417692	0.0182494	-5.77601	down
Zmpn000199	UPLC-MS/MS	C6H10O8	D-Galactaric acid	D-半乳糖二酸	Others	其它类	Saccharides and Alcohols	糖及醇类	526-99-8	1232900	997350	504750	2104300	2281700	4583700	1.2571	0.112848	0.338935	3.2796	1.71352	up
Zmyn000108	UPLC-MS/MS	C6H10O8	D-Saccharic acid	D-蔗糖酸	Others	其它类	Saccharides and Alcohols	糖及醇类	87-73-0	1526000	1195400	1484900	4336200	3657600	6694600	1.4012	0.061171	0.275212	3.492	1.80405	up
Hmcn000192	UPLC-MS/MS	C7H14O7	Sedoheptulose	景天庚酮糖	Others	其它类	Saccharides and Alcohols	糖及醇类	3019-74-7	1096400	856510	866990	2193400	2147100	2675800	1.42977	0.00604071	0.126127	2.48814	1.31507	up
mws0863	UPLC-MS/MS	C5H11O7P	2-Deoxyribose-5'-phosphate	2-脱氧核糖-5'-磷酸	Nucleotides and derivatives	核苷酸及其衍生物	Nucleotides and derivatives	核苷酸及其衍生物	102916-66-5	86979	117390	93336	239200	187880	175360	1.36377	0.020326	0.196788	2.02361	1.01693	up
Hmln002597	UPLC-MS/MS	C10H9NaO4	Sodium ferulate	阿魏酸钠	Phenolic acids	酚酸类	Phenolic acids	酚酸类	24276-84-4	644230	1228600	1303700	206200	27776	316160	1.16966	0.0378188	0.242405	0.173188	-2.52959	down
mws0677	UPLC-MS/MS	C12H14N2O2	N-Acetyl-5-hydroxytryptamine	N-乙酰-5-羟基色胺	Alkaloids	生物碱	Plumerane	吲哚类生物碱	1210-83-9	18116	45783	56664	20105	9253	6028	1.15765	0.11887	0.344813	0.293506	-1.76854	down
pme1228	UPLC-MS/MS	C11H12N2O3	5-Hydroxy-L-tryptophan	5-羟基-L-色氨酸	Amino acids and derivatives	氨基酸及其衍生物	Amino acids and derivatives	氨基酸及其衍生物	56-69-9	31518	32027	47794	2963.5	8273.2	7063.8	1.36629	0.0210798	0.199595	0.164367	-2.605	down
mws4174	UPLC-MS/MS	C8H15NO6	N-Acetyl-D-mannosamine	N-乙酰-D-甘露糖胺	Others	其它类	Saccharides and Alcohols	糖及醇类	7772-94-3	74446	69424	51649	115870	250790	113730	1.2077	0.168525	0.398437	2.457	1.2969	up
mws1639	UPLC-MS/MS	C11H10O5	Isofraxidin	异嗪皮啶	Lignans and Coumarins	木脂素和香豆素	Coumarins	香豆素	486-21-5	331640	912700	1744300	228320	57899	139120	1.22041	0.170787	0.40067	0.142319	-2.8128	down
Lmjp002764	UPLC-MS/MS	C11H10O5	Umckalin (7-hydroxy-5,6-dimethoxycoumarin)	5,6-二甲氧基-7-羟基香豆素	Lignans and Coumarins	木脂素和香豆素	Coumarins	香豆素	43053-62-9	165560	589120	1141600	78480	38094	83631	1.24858	0.183099	0.414243	0.105578	-3.24362	down
pmp000284	UPLC-MS/MS	C11H10O5	Fraxidin (8-Hydroxy-6,7-dimethoxycoumarin)	秦皮啶	Lignans and Coumarins	木脂素和香豆素	Coumarins	香豆素	525-21-3	122190	354470	624540	81438	14736	51471	1.20543	0.157781	0.384577	0.134076	-2.89887	down
MWS4296	UPLC-MS/MS	C11H14N2O3	Glycylphenylalanine	甘氨酰苯基丙氨酸	Amino acids and derivatives	氨基酸及其衍生物	Amino acids and derivatives	氨基酸及其衍生物	3321-03-7	319730	364870	678060	105670	10728	51571	1.25851	0.064205	0.279243	0.123266	-3.02016	down
mws5042	UPLC-MS/MS	C11H14N2O3	L-Glycyl-L-phenylalanine	L-甘氨酰-L-苯丙氨酸	Amino acids and derivatives	氨基酸及其衍生物	Amino acids and derivatives	氨基酸及其衍生物	721-66-4	312760	399760	758490	111680	16902	53689	1.29204	0.0823386	0.301676	0.123909	-3.01265	down
Lmmp003517	UPLC-MS/MS	C13H20O3	Solatuberenol A	Solatuberenol A	Others	其它类	Others	其它	-	22432	42124	13556	368140	252660	442160	1.41237	0.0248502	0.209697	13.6082	3.7664	up
Cmsp002787	UPLC-MS/MS	C11H14O5	3,4'-Dihydroxy-3',5'-dimethoxypropiophenone	3,4'-二羟基-3',5'-二甲氧基苯乙酮	Phenolic acids	酚酸类	Phenolic acids	酚酸类	136196-47-9	25060	8039.2	6893	26854	60683	48130	1.20254	0.0630427	0.27659	3.39234	1.76228	up
pme1194	UPLC-MS/MS	C9H13N3O4	2'-Deoxycytidine	2'-脱氧胞苷	Nucleotides and derivatives	核苷酸及其衍生物	Nucleotides and derivatives	核苷酸及其衍生物	951-77-9	161010	150950	208910	85336	40071	54254	1.34428	0.00859185	0.144429	0.344925	-1.53565	down
Lmhp001461	UPLC-MS/MS	C11H20N2O3	L-Prolyl-L-Leucine	L-脯氨酰-L-亮氨酸	Amino acids and derivatives	氨基酸及其衍生物	Amino acids and derivatives	氨基酸及其衍生物	52899-07-7	330540	405060	953170	79815	10302	25762	1.32999	0.114621	0.341891	0.0686174	-3.86528	down
Lmhp001670	UPLC-MS/MS	C11H22N2O3	L-Valyl-L-Leucine	L-缬氨酰-L-亮氨酸	Amino acids and derivatives	氨基酸及其衍生物	Amino acids and derivatives	氨基酸及其衍生物	3989-97-7	1447900	1458100	3311000	13557	1814	7816.2	1.42654	0.0794117	0.297237	0.00372964	-8.06675	down
pmb0962	UPLC-MS/MS	C10H22N2O4	L-Lysine-Butanoic Acid	L-赖氨酸丁酸酯	Amino acids and derivatives	氨基酸及其衍生物	Amino acids and derivatives	氨基酸及其衍生物	80407-71-2	11352	10080	14265	3027.4	979.43	6843.9	1.13982	0.0208384	0.199519	0.303968	-1.71801	down
Hmlp006964	UPLC-MS/MS	C12H12O5	5,6,7-Trimethoxycoumarin	5,6,7-三甲氧基香豆素	Lignans and Coumarins	木脂素和香豆素	Coumarins	香豆素	55085-47-7	9	268510	79672	9	9	9	1.03547	0.282276	0.509249	7.75436e-05	-13.6546	down
MWSHY0202	UPLC-MS/MS	C16H12O2	6-Methylflavone	6-甲基黄酮	Flavonoids	黄酮	Flavones	黄酮	29976-75-8	28795	12041	10788	3309.1	3294.7	11217	1.07063	0.182144	0.414243	0.345204	-1.53448	down
mws4176	UPLC-MS/MS	C12H16N2O3	L-Alanyl-L-Phenylalanine	L-丙氨酰-L-苯丙氨酸	Amino acids and derivatives	氨基酸及其衍生物	Amino acids and derivatives	氨基酸及其衍生物	3061-90-3	229440	253470	499800	35027	1243.1	18360	1.25304	0.0681427	0.283268	0.0555913	-4.169	down
mws0221	UPLC-MS/MS	C6H12N2O4S2	L-Cystine	L-胱氨酸	Amino acids and derivatives	氨基酸及其衍生物	Amino acids and derivatives	氨基酸及其衍生物	56-89-3	13062	13405	6026	25517	25217	25826	1.27022	0.0252457	0.209697	2.3562	1.23646	up
Zmcp102602	UPLC-MS/MS	C17H22O	Bupleurynol	柴胡炔醇	Others	其它类	Others	其它	-	5100400	12469000	6585000	16713000	14243000	17792000	1.19112	0.0496526	0.256095	2.01818	1.01306	up
mws0359	UPLC-MS/MS	C15H30O2	Pentadecanoic Acid	十五烷酸	Lipids	脂质	Free fatty acids	游离脂肪酸	1002-84-2	51040	81427	147240	39438	55123	36824	1.05149	0.220492	0.447002	0.469724	-1.09012	down
MWS2430	UPLC-MS/MS	C15H30O2	13-methylmyristic acid	13-甲基十四烷酸	Lipids	脂质	Free fatty acids	游离脂肪酸	2485-71-4	74362	102530	177840	26973	24351	22695	1.38521	0.0936337	0.309846	0.208662	-2.26076	down
pme2266	UPLC-MS/MS	C10H16N2O3S	Biotin	D-生物素	Others	其它类	Vitamin	维生素	58-85-5	222090	176470	354370	74262	132470	52314	1.25074	0.0733492	0.292147	0.344051	-1.53931	down
Lmhp002031	UPLC-MS/MS	C12H24N2O3	L-Leucyl-L-Leucine	L-亮氨酰-L-亮氨酸	Amino acids and derivatives	氨基酸及其衍生物	Amino acids and derivatives	氨基酸及其衍生物	3303-31-9	470640	959130	1029100	9	9	9	1.46177	0.0429913	0.245995	1.09807e-05	-16.4747	down
Lmrj002087	UPLC-MS/MS	C10H18N2O5	L-Isoleucyl-L-Aspartate	L-异亮氨酰-L-天冬氨酸	Amino acids and derivatives	氨基酸及其衍生物	Amino acids and derivatives	氨基酸及其衍生物	-	181140	285750	575160	102270	81157	58740	1.29229	0.150543	0.3795	0.232395	-2.10535	down
pma3101	UPLC-MS/MS	C11H14NO6+	Nicotinate D-ribonucleoside	烟酸核糖核苷	Others	其它类	Vitamin	维生素	17720-18-2	17614000	16208000	9940300	28616000	30164000	30561000	1.31848	0.0183195	0.190106	2.04151	1.02963	up
pme3313	UPLC-MS/MS	C6H13O9P	D-Fructose 6-phosphate	D-果糖-6-磷酸	Others	其它类	Saccharides and Alcohols	糖及醇类	643-13-0	1736400	942190	1419400	541220	619590	635060	1.31931	0.0775723	0.296736	0.438232	-1.19023	down
Lmhp001732	UPLC-MS/MS	C14H18N2O3	L-Prolyl-L-Phenylalanine	L-脯氨酰-L-苯丙氨酸	Amino acids and derivatives	氨基酸及其衍生物	Amino acids and derivatives	氨基酸及其衍生物	13589-02-1	47706	51765	72671	30620	22306	29006	1.33827	0.0488057	0.252478	0.475956	-1.0711	down
Lmhp002001	UPLC-MS/MS	C14H20N2O3	L-Valyl-L-Phenylalanine	L-缬氨酰-L-苯丙氨酸	Amino acids and derivatives	氨基酸及其衍生物	Amino acids and derivatives	氨基酸及其衍生物	3918-92-1	473470	524750	885830	5288.3	1651.5	9332.6	1.42519	0.0407593	0.242405	0.00863693	-6.85527	down
pme1184	UPLC-MS/MS	C10H13N5O4	2'-Deoxyguanosine	2'-脱氧鸟苷	Nucleotides and derivatives	核苷酸及其衍生物	Nucleotides and derivatives	核苷酸及其衍生物	961-07-9	532100	468770	757760	376460	201750	111340	1.19484	0.039135	0.242405	0.392095	-1.35072	down
pme2890	UPLC-MS/MS	C8H16N2O4S2	L-Homocystine	L-高胱氨酸	Amino acids and derivatives	氨基酸及其衍生物	Amino acids and derivatives	氨基酸及其衍生物	626-72-2	59736	82265	74140	3666.5	8204.9	14708	1.36319	0.00374555	0.0950649	0.122973	-3.02359	down
Zmyn003693	UPLC-MS/MS	C16H12O4	6-Hydroxy-2'-methoxyflavone	6-羟基-2'-甲氧基黄酮	Flavonoids	黄酮	Flavones	黄酮	61546-59-6	9	9	9	11320	10743	9863.7	1.46253	0.0015818	0.0677987	1182.47	10.2076	up
mws1175	UPLC-MS/MS	C16H14O4	Pinostrobin	球松素	Flavonoids	黄酮	Flavanones	二氢黄酮	480-37-5	1285.7	4181.8	10096	9	9	9	1.43579	0.183836	0.414828	0.00173483	-9.17099	down
MWS20159	UPLC-MS/MS	C13H18O6	Phenyl-β-D-glucopyranoside	苄基 β-D-吡喃葡萄糖苷	Others	其它类	Others	其它	-	78513	52354	57618	12983	20807	30913	1.2956	0.0171468	0.180094	0.343279	-1.54255	down
MWSmce675	UPLC-MS/MS	C12H16O7	Arbutin	熊果苷	Phenolic acids	酚酸类	Phenolic acids	酚酸类	497-76-7	140810	122970	67155	43440	34889	32009	1.33157	0.076927	0.296254	0.333413	-1.58462	down
pmb1650	UPLC-MS/MS	C18H30O2	Octadeca-11E,13E,15Z-trienoic acid	十八碳-9E,13E,15Z-三烯酸	Lipids	脂质	Free fatty acids	游离脂肪酸	25575-00-2	2870800	2785900	3242200	1370500	1335900	1532700	1.43918	0.00302918	0.0833265	0.476362	-1.06987	down
mws0629	UPLC-MS/MS	C13H16N2O5	L-Aspartyl-L-Phenylalanine	L-天冬氨酰-L-苯丙氨酸	Amino acids and derivatives	氨基酸及其衍生物	Amino acids and derivatives	氨基酸及其衍生物	13433-09-5	72043	85502	234890	20834	8438	17616	1.33329	0.157348	0.384577	0.11948	-3.06516	down
mws0918	UPLC-MS/MS	C16H12O5	Prunetin (5,4'-Dihydroxy-7-methoxyisoflavone)	樱黄素	Flavonoids	黄酮	Isoflavones	异黄酮	552-59-0	9	9	9	9	6876.7	46036	1.04062	0.343768	0.551512	1960.06	10.9367	up
mws1068	UPLC-MS/MS	C15H10O6	Kaempferol (3,5,7,4'-Tetrahydroxyflavone)	山奈酚	Flavonoids	黄酮	Flavonols	黄酮醇	520-18-3	13252	56175	91993	26648	5976.3	6416	1.00493	0.208879	0.440885	0.241855	-2.04778	down
mws0054	UPLC-MS/MS	C15H14O6	Catechin	儿茶素	Flavonoids	黄酮	Flavanols	黄烷醇类	154-23-4	407750	1627100	275610	9	9	9	1.45658	0.215286	0.444156	1.1686e-05	-16.3849	down
pmb2792	UPLC-MS/MS	C18H30O3	13-Hydroxy-6,9,11-octadecatrienoic acid	13-羟基-6,9,11-十八碳三烯酸	Lipids	脂质	Free fatty acids	游离脂肪酸	74784-20-6	28160	38060	28986	73449	67421	71041	1.41921	0.00145434	0.0663258	2.22582	1.15433	up
Lmcn009539	UPLC-MS/MS	C19H34O2	E,E,Z-1,3,12-Nonadecatriene-5,14-diol	E,E,Z-1,3,12-十九碳三烯-5,14-二醇	Lipids	脂质	Free fatty acids	游离脂肪酸	-	6962.1	7286.9	13032	2613.9	4105.4	2450.6	1.32078	0.0833922	0.30281	0.336128	-1.57292	down
Lmqp000329	UPLC-MS/MS	C8H14N3O7P	5-Aminoimidazole ribonucleotide	5-氨基咪唑核糖核苷酸	Nucleotides and derivatives	核苷酸及其衍生物	Nucleotides and derivatives	核苷酸及其衍生物	25635-88-5	238840	590170	510810	139830	236410	197020	1.14219	0.130409	0.357941	0.427863	-1.22478	down
Hmtn001302	UPLC-MS/MS	C13H16O8	Glucosyloxybenzoic acid	葡萄糖氧基苯甲酸	Phenolic acids	酚酸类	Phenolic acids	酚酸类	-	34175000	26620000	44347000	22077000	9282800	11007000	1.2443	0.0352995	0.241686	0.402948	-1.31133	down
Lmsn002247	UPLC-MS/MS	C13H16O8	1-O-Salicyloyl-β-D-glucose	1-O-水杨酰-β-D-葡萄糖	Phenolic acids	酚酸类	Phenolic acids	酚酸类	60517-74-0	84558	144910	189220	83058	52217	52839	1.18968	0.115182	0.342385	0.449294	-1.15427	down
mws2367	UPLC-MS/MS	C14H20O7	Salidroside	红景天苷	Phenolic acids	酚酸类	Phenolic acids	酚酸类	10338-51-9	9	22229	10557	9	9	9	1.0365	0.230842	0.452979	0.000823296	-10.2463	down
pme2954	UPLC-MS/MS	C15H10O7	Quercetin	槲皮素	Flavonoids	黄酮	Flavonols	黄酮醇	117-39-5	63414	42602	70456	13973	7257	32151	1.20002	0.0219649	0.202611	0.30249	-1.72504	down
mws0463	UPLC-MS/MS	C16H14O6	Hesperetin	橙皮素	Flavonoids	黄酮	Flavanones	二氢黄酮	520-33-2	27960	76522	7037.1	9	9	9	1.4417	0.212707	0.442289	0.000242111	-12.012	down
Hmqn000843	UPLC-MS/MS	C13H18O8	Tachioside	它乔糖苷	Phenolic acids	酚酸类	Phenolic acids	酚酸类	109194-60-7	2530000	2774600	1861200	1362400	889830	1024200	1.34183	0.0244347	0.208598	0.457232	-1.129	down
Hmsn002598	UPLC-MS/MS	C13H18O8	Salirepin	柳匍匐次苷	Phenolic acids	酚酸类	Phenolic acids	酚酸类	26652-12-0	333960	266120	418770	166050	95324	107890	1.35527	0.0230632	0.206023	0.362432	-1.46422	down
mws0369	UPLC-MS/MS	C20H32O2	Arachidonic Acid	花生四烯酸	Lipids	脂质	Free fatty acids	游离脂肪酸	506-32-1	12360	26700	48302	9615.5	9	9	1.13387	0.121188	0.347402	0.110271	-3.18087	down
Lmlp004754	UPLC-MS/MS	C14H17NO7	Ehretioside B	2-(葡萄糖基氧基)-4-羟基苯乙腈	Alkaloids	生物碱	Alkaloids	生物碱	156368-84-2	28276	26468	87588	22803	13121	14964	1.06705	0.266977	0.491276	0.35753	-1.48386	down
Jmbn003691	UPLC-MS/MS	C15H20O7	3,4-dihydroxy-allylbenzene-3-O-β-D-glucopyranoside	3,4-二羟基烯丙基-3-O-β-D-葡萄吡喃糖苷	Others	其它类	Others	其它	-	75384	46428	78582	48203	18141	29370	1.12713	0.0620844	0.275212	0.477629	-1.06604	down
Lmbn004685	UPLC-MS/MS	C18H32O4	5S,8R-DiHODE; (5S,8R,9Z,12Z)-5,8-Dihydroxyoctadeca-9,12-dienoate	5,8-二羟基-9,12-十八碳二烯酸	Lipids	脂质	Free fatty acids	游离脂肪酸	-	4113.5	3348	4637.8	6111.2	10038	8613.5	1.31665	0.0550675	0.268823	2.04662	1.03325	up
mws1174	UPLC-MS/MS	C17H14O6	3-O-Acetylpinobanksin	3-O-乙酰短叶松黄烷酮	Flavonoids	黄酮	Flavanonols	二氢黄酮醇	52117-69-8	9	509.83	9	329390	697410	255910	1.40042	0.0887354	0.30281	2430.16	11.2468	up
Lmbn005487	UPLC-MS/MS	C18H34O4	12,13-DHOME; (9Z)-12,13-Dihydroxyoctadec-9-enoic acid	12,13-二羟基十八烷基-9-烯酸	Lipids	脂质	Free fatty acids	游离脂肪酸	263399-35-5	21285	13214	28150	36462	38455	63457	1.21062	0.0821287	0.301676	2.20872	1.14321	up
Hmtn001120	UPLC-MS/MS	C14H20O8	5-(2-Hydroxyethyl)-2-O-glucosylphenol	5-(2-羟乙基)-2-O-葡萄糖基苯酚	Phenolic acids	酚酸类	Phenolic acids	酚酸类	-	18858	89193	6029.2	389670	246960	52696	1.04354	0.182303	0.414243	6.04247	2.59514	up
pmb2221	UPLC-MS/MS	C18H39NO3	4-Hydroxysphinganine	4-羟基鞘氨醇	Lipids	脂质	Sphingolipids	鞘脂	554-62-1	130500	94462	129450	27259	6605.8	24177	1.3193	0.00476292	0.111542	0.163769	-2.61026	down
pme2074	UPLC-MS/MS	C18H29NO4	(-)-Jasmonoyl-L-Isoleucine	(-)-茉莉酰-L-异亮氨酸	Organic acids	有机酸	Organic acids	有机酸	120330-93-0	190200	63479	355480	49199	92869	39075	1.00168	0.23066	0.452979	0.297366	-1.74969	down
Hmhn003067	UPLC-MS/MS	C15H18O8	Phenylpropionic acid-O-β-D-glucopyranoside	苯基丙酸-O-β-D-吡喃葡萄糖苷	Phenolic acids	酚酸类	Phenolic acids	酚酸类	-	430130	327790	184010	1846600	1086600	1395300	1.36807	0.0269214	0.21575	4.59535	2.20018	up
Zmhn002301	UPLC-MS/MS	C15H18O8	p-Coumaric acid-4-O-glucoside	对香豆酸-4-O-葡萄糖苷	Phenolic acids	酚酸类	Phenolic acids	酚酸类	117405-48-8	385680	314970	180860	1433100	865850	1138300	1.36298	0.0241698	0.208389	3.89928	1.96321	up
Zmgp004718	UPLC-MS/MS	C20H22O4	1-(4-hydroxy-3-methoxyphenyl)-7-phenyl-3,5-diheptanone	1-(4-羟基-3-甲氧基苯基)-7-苯基-3,5-二庚酮	Others	其它类	Others	其它	-	27579	9928.1	36465	135630	194060	40784	1.13775	0.153726	0.381126	5.00829	2.32432	up
pmn001690	UPLC-MS/MS	C16H24O7	3-Hydroxy-4-isopropylbenzylalcohol-3-O-glucoside	3-羟基-4-异丙基苯甲醇-3-O-葡萄糖苷	Phenolic acids	酚酸类	Phenolic acids	酚酸类	-	167920	283120	352660	5532.4	3675.9	16791	1.4029	0.0398805	0.242405	0.0323495	-4.95011	down
Lmtn002565	UPLC-MS/MS	C14H18O9	1-O-Vanilloyl-D-Glucose	1-O-香草酰-D-葡萄糖	Phenolic acids	酚酸类	Phenolic acids	酚酸类	-	164220	338680	356550	20164	13514	8958	1.43147	0.0468452	0.250377	0.0496085	-4.33327	down
Zmhn001883	UPLC-MS/MS	C14H18O9	Vanillic acid-4-O-glucoside	香草酸-4-O-葡萄糖苷	Phenolic acids	酚酸类	Phenolic acids	酚酸类	32142-31-7	412280	1030100	290630	9	9	22091	1.22176	0.13021	0.357941	0.0127576	-6.2925	down
Lmmn003663	UPLC-MS/MS	C14H18O9	5-Glucosyloxy-2-Hydroxybenzoic acid methyl ester	5-葡萄糖氧基-2-羟基苯甲酸甲酯	Phenolic acids	酚酸类	Phenolic acids	酚酸类	-	151550	341870	452750	9	20691	9	1.22106	0.0716776	0.286215	0.0218872	-5.51377	down
pme3184	UPLC-MS/MS	C10H14N5O6P	2'-Deoxyadenosine-5'-monophosphate	2'-脱氧腺苷-5'-单磷酸	Nucleotides and derivatives	核苷酸及其衍生物	Nucleotides and derivatives	核苷酸及其衍生物	653-63-4	115770	70658	163560	64489	75421	32792	1.04828	0.145172	0.372165	0.493451	-1.01902	down
Zmhn001703	UPLC-MS/MS	C13H16O10	5-O-Galloyl-D-hamamelose	5-O-没食子酰-D-金缕梅糖	Phenolic acids	酚酸类	Phenolic acids	酚酸类	-	9	45225	9	2006600	1265800	877310	1.23315	0.0536432	0.264102	91.7205	6.51917	up
Lmfn000604	UPLC-MS/MS	C13H16O10	6-O-Galloyl-D-glucose	6-O-没食子酰-D-葡萄糖	Phenolic acids	酚酸类	Phenolic acids	酚酸类	13186-19-1	9	9	9	1864700	1213400	891700	1.46099	0.0437338	0.245995	147030	17.1657	up
Hmln000659	UPLC-MS/MS	C13H16O10	3-O-Galloyl-D-glucose	3-O-没食子酰-D-葡萄糖	Phenolic acids	酚酸类	Phenolic acids	酚酸类	-	9	36943	9	2049800	1288900	901070	1.24488	0.0532188	0.264037	114.709	6.84184	up
Jmwn002117	UPLC-MS/MS	C14H20O9	2-(3,4-dihydroxyphenyl)ethanediol 1-O-β-D-glucopyranoside	2-(3,4-二羟苯基)乙二醇-1-O-β-D-吡喃葡萄糖苷	Phenolic acids	酚酸类	Phenolic acids	酚酸类	-	425050	636750	448300	249320	196640	218940	1.38132	0.0461673	0.248347	0.440302	-1.18343	down
Cmcp007926	UPLC-MS/MS	C20H28O4	Pinusolidic acid	松内酯酸	Terpenoids	萜类	Ditepenoids	二萜	40433-82-7	9	9	9	69307	85084	61288	1.46225	0.00932344	0.14653	7988.11	12.9636	up
Lmqn000432	UPLC-MS/MS	C9H19O11P	1-(sn-Glycero-3-phospho)-1D-myo-inositol	1-(sn-甘油-3-磷酸)-1D-肌醇	Others	其它类	Saccharides and Alcohols	糖及醇类	-	126670	76654	91861	59763	51022	23551	1.17401	0.0481195	0.252085	0.455091	-1.13577	down
MWSmce232	UPLC-MS/MS	C19H12O6	Dicumarol	双香豆素	Lignans and Coumarins	木脂素和香豆素	Coumarins	香豆素	66-76-2	9	10030	9	108340	322380	89106	1.22509	0.150661	0.3795	51.7343	5.69305	up
MWSmce310	UPLC-MS/MS	C21H22O4	Bergamottin	佛手柑素	Lignans and Coumarins	木脂素和香豆素	Coumarins	香豆素	7380-40-7	213960	96233	118770	369880	474180	547800	1.34922	0.00938539	0.14653	3.24471	1.69809	up
Hmcn004128	UPLC-MS/MS	C16H20O8	P-Methoyxcinnamate glucoside	对甲氧基桂皮酸葡萄糖苷	Lignans and Coumarins	木脂素和香豆素	Coumarins	香豆素	-	1715800	1843100	2398300	982140	871700	741920	1.40099	0.0240499	0.208389	0.435735	-1.19848	down
Xmgp006913	UPLC-MS/MS	C20H20O5	2,4,2',4'-tetrahydroxy-3'-prenylchalcone	2,4,2',4'-四羟基-3'-异戊烯基查尔酮	Flavonoids	黄酮	Chalcones	查耳酮	-	1574900	1154400	1776400	298560	262100	210010	1.44078	0.0193382	0.192586	0.171043	-2.54757	down
MA10039641	UPLC-MS/MS	C12H22O11	Lactobiose	乳二糖	Others	其它类	Saccharides and Alcohols	糖及醇类	63-42-3	934780	339970	270650	903310	1185600	1330000	1.12231	0.0776171	0.296736	2.21231	1.14556	up
Hmjp006104	UPLC-MS/MS	C19H21NO5	N-Cis-Feruloyl-3'-O-methyldopamine	N-顺式阿魏酰基-3'-O-甲基多巴胺	Alkaloids	生物碱	Phenolamine	酚胺	-	2328800	2532500	1201800	12515	9	9	1.32229	0.0396015	0.242405	0.00206709	-8.91818	down
Lmyn000503	UPLC-MS/MS	C13H12O11	Mucic acid-1,4-lactone-2-O-gallate	粘酸-1,4-内酯-2-O-没食子酸酯	Phenolic acids	酚酸类	Phenolic acids	酚酸类	-	24758	63535	24137	367180	458920	191790	1.36628	0.0576946	0.272246	9.05354	3.17848	up
mws1474	UPLC-MS/MS	C18H16O7	5,7-Dihydroxy-3',4',5'-trimethoxyflavone	5,7-二羟基-3',4',5'-三甲氧基黄酮	Flavonoids	黄酮	Flavones	黄酮	18103-42-9	9	9	9	3117	8970.2	8175.4	1.45718	0.0665602	0.282718	750.467	9.55164	up
Lmmn004685	UPLC-MS/MS	C20H24O5	Nectandrin B	甘密树皮素 B	Lignans and Coumarins	木脂素和香豆素	Lignans	木脂素	74683-16-2	16086	81148	9	9	9	9	1.02846	0.321445	0.53667	0.000277655	-11.8144	down
Lmdn001560	UPLC-MS/MS	C15H22O9	6-DeoxyCatalpol	6-脱氧梓醇	Terpenoids	萜类	Monoterpenoids	倍萜	99499-99-7	8042.4	15815	4389.1	25417	39889	15767	1.12263	0.112283	0.338935	2.8702	1.52115	up
mws1629	UPLC-MS/MS	C15H22O9	Aucubin	桃叶珊瑚苷	Terpenoids	萜类	Sesquiterpenoids	倍半萜	479-98-1	7107.5	9	9	49175	18435	30011	1.16669	0.069592	0.283796	13.7002	3.77613	up
Cmrn003066	UPLC-MS/MS	C16H26O8	Kankanoside P	甘蓝苷 P	Terpenoids	萜类	Monoterpenoids	倍萜	-	9	9	9	16981	35737	9	1.01277	0.230769	0.452979	1952.85	10.9314	up
Lmhp011562	UPLC-MS/MS	C21H36O4	1-α-Linolenoyl-glycerol	1-α-亚麻酸甘油酯	Lipids	脂质	Glycerol ester	甘油酯	-	13146	13447	34139	3538.9	4835.6	2680.5	1.3429	0.13891	0.366411	0.182029	-2.45776	down
MWSmce024	UPLC-MS/MS	C16H18O9	Scopoletin-7-O-glucoside (Scopolin)	东莨菪内酯-7-O-葡萄糖苷 (东莨菪苷)	Lignans and Coumarins	木脂素和香豆素	Coumarins	香豆素	531-44-2	257330	1214300	7373300	380110	54900	192180	1.00625	0.344145	0.551512	0.0709095	-3.81788	down
pme1816	UPLC-MS/MS	C16H18O9	Neochlorogenic acid (5-O-Caffeoylquinic acid)*	新绿原酸 (5-O-咖啡酰奎宁酸)*	Phenolic acids	酚酸类	Phenolic acids	酚酸类	906-33-2	51017	44626	55925	10138	10554	26478	1.29257	0.00901699	0.14653	0.311213	-1.68402	down
mws2108	UPLC-MS/MS	C16H18O9	Cryptochlorogenic acid (4-O-Caffeoylquinic acid)*	隐绿原酸 (4-O-咖啡酰奎宁酸)*	Phenolic acids	酚酸类	Phenolic acids	酚酸类	905-99-7	5226400	7542800	2442300	544310	114300	1493700	1.18558	0.0889136	0.30281	0.141492	-2.8212	down
mws0178	UPLC-MS/MS	C16H18O9	Chlorogenic acid (3-O-Caffeoylquinic acid)*	绿原酸 (3-O-咖啡酰奎宁酸)*	Phenolic acids	酚酸类	Phenolic acids	酚酸类	327-97-9	5449800	7727700	2408700	621150	115600	1565700	1.16823	0.0935992	0.309846	0.147724	-2.75903	down
Lmgp008453	UPLC-MS/MS	C20H18O6	Albanin A	Albanin A	Flavonoids	黄酮	Flavones	黄酮	73343-42-7	9	9	42852	84372	159770	194130	1.12664	0.0391649	0.242405	10.2233	3.35379	up
Lmhp012042	UPLC-MS/MS	C21H38O4	2-Linoleoylglycerol	2-亚油酰甘油酯	Lipids	脂质	Glycerol ester	甘油酯	3443-82-1	158560	255840	622730	146560	106210	136720	1.03499	0.265706	0.490381	0.375546	-1.41294	down
Lmhp112042	UPLC-MS/MS	C21H38O4	1-Linoleoylglycerol	1-亚油酰甘油酯	Lipids	脂质	Glycerol ester	甘油酯	2277-28-3	82843	86397	321670	36799	20815	34653	1.22749	0.234328	0.45563	0.187951	-2.41157	down
Zmhn002422	UPLC-MS/MS	C16H20O9	1-O-Feruloyl-β-D-glucose	1-O-阿魏酰-β-D-葡萄糖	Phenolic acids	酚酸类	Phenolic acids	酚酸类	7196-71-6	25118	10936	9010.5	3652.9	1525.4	2740.1	1.31857	0.133014	0.357941	0.175713	-2.50871	down
Zmhn003082	UPLC-MS/MS	C15H18O10	5-O-Galloyl-methyl quinine ester	5-O-没食子酰-奎宁酸甲酯	Phenolic acids	酚酸类	Phenolic acids	酚酸类	-	9	9	9	27079	37123	13790	1.45712	0.0614423	0.275212	2888.59	11.4962	up
Zmdp006307	UPLC-MS/MS	C20H22O6	sanshodiol	sanshodiol	Lignans and Coumarins	木脂素和香豆素	Lignans	木脂素	-	439100	314570	430530	2795200	8154800	10299000	1.40809	0.0955689	0.313939	17.9438	4.16541	up
Hmlp003129	UPLC-MS/MS	C20H22O6	Matairesinol	罗汉松树脂醇	Lignans and Coumarins	木脂素和香豆素	Lignans	木脂素	580-72-3	397390	295270	396280	2563800	8264400	10125000	1.40381	0.100496	0.320577	19.2418	4.26617	up
Lmdn004267	UPLC-MS/MS	C20H22O6	Epipinoresinol	表松脂醇	Lignans and Coumarins	木脂素和香豆素	Lignans	木脂素	24404-50-0	98822	113240	342800	30306	20597	34880	1.31014	0.186143	0.417317	0.154602	-2.69337	down
Lmsp004450	UPLC-MS/MS	C20H22O6	Dehydrodiconiferyl alcohol	脱氢双松柏醇	Phenolic acids	酚酸类	Phenolic acids	酚酸类	97465-82-2	412030	371520	502180	147960	174710	148200	1.43248	0.0157646	0.174816	0.366228	-1.44919	down
mws0097	UPLC-MS/MS	C20H22O6	Pinoresinol	松脂醇	Lignans and Coumarins	木脂素和香豆素	Lignans	木脂素	487-36-5	106860	106400	347060	63660	37356	37499	1.21261	0.220355	0.447002	0.247207	-2.01621	down
pmb3107	UPLC-MS/MS	C15H20O10	Glucosyringic Acid	葡萄糖基丁香酸	Phenolic acids	酚酸类	Phenolic acids	酚酸类	-	289630	574070	227360	985480	583790	739800	1.14627	0.0628231	0.276326	2.11635	1.08158	up
Lmyn000716	UPLC-MS/MS	C13H14O12	2-O-Galloylmucic acid	2-O-没食子酰基粘酸	Phenolic acids	酚酸类	Phenolic acids	酚酸类	-	630020	581790	280050	2018300	760040	2813700	1.17525	0.145486	0.372418	3.74837	1.90626	up
mws5040	UPLC-MS/MS	C12H21O11Na	Turanose	松二糖	Others	其它类	Saccharides and Alcohols	糖及醇类	547-25-1	643320	363910	601200	908090	1515400	813920	1.16204	0.118336	0.344813	2.01278	1.00919	up
pmb0964	UPLC-MS/MS	C16H23N5O5	Isopentenyladenine-7-N-glucoside	异戊烯基腺苷-7-N-葡萄糖苷	Nucleotides and derivatives	核苷酸及其衍生物	Nucleotides and derivatives	核苷酸及其衍生物	-	60937	59623	23030	88702	116700	87973	1.1187	0.0363159	0.241686	2.04314	1.03079	up
Lmgp003270	UPLC-MS/MS	C16H16O10	Scopoletin-7-O-glucuronide	东莨菪内酯-7-O-葡萄糖醛酸苷	Lignans and Coumarins	木脂素和香豆素	Coumarins	香豆素	132752-65-9	2647500	3255500	3153400	149380	67346	307090	1.39864	0.00171517	0.0707711	0.0578393	-4.11181	down
pmb0752	UPLC-MS/MS	C17H20O9	3-O-Feruloylquinic acid*	3-O-阿魏酰奎宁酸*	Phenolic acids	酚酸类	Phenolic acids	酚酸类	1899-29-2	1478200	434630	713630	26994	31724	114700	1.34246	0.118732	0.344813	0.0660273	-3.92079	down
Lmgn003073	UPLC-MS/MS	C17H20O9	5-O-Feruloylquinic acid*	5-O-阿魏酰奎尼酸*	Phenolic acids	酚酸类	Phenolic acids	酚酸类	-	101240	145500	134640	9	9	9	1.46271	0.0107984	0.152144	7.07955e-05	-13.786	down
pma3724	UPLC-MS/MS	C17H20O9	1-O-Feruloylquinic acid*	1-O-阿魏酰奎宁酸*	Phenolic acids	酚酸类	Phenolic acids	酚酸类	-	2250400	2704800	2456400	111030	75548	213560	1.42875	0.00149868	0.0665951	0.0539881	-4.21122	down
MWSmce025	UPLC-MS/MS	C16H18O10	Fraxetin-8-O-glucoside (Fraxin)	秦皮苷	Lignans and Coumarins	木脂素和香豆素	Coumarins	香豆素	524-30-1	758630	499220	1167000	193120	30511	38026	1.31599	0.0568797	0.272246	0.107906	-3.21215	down
Hmgn004693	UPLC-MS/MS	C20H20O7	(8'R,7'S)-(-)-8-Hydroxy-α-conidendrin	羟基铁杉脂素	Lignans and Coumarins	木脂素和香豆素	Lignans	木脂素	-	49236	376730	30542	9	9	9	1.44345	0.308539	0.527836	5.91446e-05	-14.0454	down
pmp000674	UPLC-MS/MS	C21H24O6	Phillygenin	连翘脂素	Lignans and Coumarins	木脂素和香豆素	Lignans	木脂素	487-39-8	9	9	18664	75366	527350	217350	1.20221	0.18301	0.414243	43.896	5.45602	up
Hmln003558	UPLC-MS/MS	C21H24O6	Arctigenin	牛蒡子苷元	Lignans and Coumarins	木脂素和香豆素	Lignans	木脂素	7770-78-7	6886	3441.5	35876	183710	1225700	578610	1.33977	0.166623	0.396645	43.0275	5.42719	up
mws1574	UPLC-MS/MS	C16H22O10	Geniposidic acid	京尼平苷酸	Terpenoids	萜类	Monoterpenoids	倍萜	27741-01-1	995540	742150	982610	29553	26058	35916	1.45679	0.00866275	0.144429	0.0336459	-4.89342	down
Lmdn001501	UPLC-MS/MS	C16H22O10	Gardoside	栀子新苷	Terpenoids	萜类	Monoterpenoids	倍萜	54835-76-6	951210	729780	967650	40893	9	46072	1.04442	0.00643351	0.132729	0.0328372	-4.92852	down
Cmlp002163	UPLC-MS/MS	C16H22O10	Gentioflavoside	龙胆黄苷	Terpenoids	萜类	Monoterpenoids	倍萜	34239-17-3	342410	350310	49335	35744	54641	46412	1.05996	0.178168	0.408961	0.184349	-2.43949	down
mws0232	UPLC-MS/MS	C17H20N4O6	Riboflavin (Vitamin B2)	核黄素 (维生素 B2)	Others	其它类	Vitamin	维生素	83-88-5	3519600	4562600	7581300	340880	1806600	371080	1.2789	0.0541114	0.264901	0.160792	-2.63674	down
Zmcp102801	UPLC-MS/MS	C17H20O10	Saikochromoside A	柴胡色原酮苷A	Others	其它类	Others	其它	-	4987900	45774000	19143000	14990	41617	15746	1.43106	0.190924	0.417952	0.00103502	-9.91613	down
Zmcp001750	UPLC-MS/MS	C17H20O10	Eleutheroside B1	刺五加苷 B1	Lignans and Coumarins	木脂素和香豆素	Coumarins	香豆素	16845-16-2	211720	1049500	326290	19585	22103	9	1.08561	0.188305	0.417952	0.0262657	-5.25068	down
Lmbp003208	UPLC-MS/MS	C17H20O10	Fraxidin-8-O-glucoside	秦皮啶-8-O-葡萄糖苷	Lignans and Coumarins	木脂素和香豆素	Coumarins	香豆素	-	156070	856990	224550	10130	24314	6480.2	1.36646	0.215631	0.444339	0.0330671	-4.91846	down
pme1286	UPLC-MS/MS	C14H20N6O5S	S-(5'-Adenosy)-L-homocysteine	S-(5-腺苷)-L-高半胱氨酸	Amino acids and derivatives	氨基酸及其衍生物	Amino acids and derivatives	氨基酸及其衍生物	979-92-0	140000	22978	102670	14869	7131.7	10497	1.23646	0.152591	0.381039	0.122334	-3.03111	down
pmb3062	UPLC-MS/MS	C17H22O10	1-O-Eudesmoylquinic acid	1-O-菊酯酰奎宁酸	Phenolic acids	酚酸类	Phenolic acids	酚酸类	-	17173	4176.2	6190.6	9	9	9	1.4509	0.151156	0.380192	0.000980399	-9.99434	down
HJN003	UPLC-MS/MS	C17H22O10	1-O-Sinapoyl-D-glucose	1-O-芥子酰-D-葡萄糖	Phenolic acids	酚酸类	Phenolic acids	酚酸类	-	31666	20047	9843.2	53885	28729	46414	1.05864	0.0845053	0.30281	2.0961	1.06771	up
Zmbp010005	UPLC-MS/MS	C21H22O7	Pteryxin	Pteryxin	Lignans and Coumarins	木脂素和香豆素	Coumarins	香豆素	13161-75-6	9	9	9	28564	58010	41730	1.46168	0.037453	0.242405	4752	12.2143	up
Lmzp006972	UPLC-MS/MS	C22H26O6	Dimethylmatairesinol	二甲基罗汉松树脂酚	Lignans and Coumarins	木脂素和香豆素	Lignans	木脂素	25488-59-9	9	9	16522	172470	335340	294780	1.22887	0.0318136	0.230682	48.5242	5.60063	up
Smgp009046	UPLC-MS/MS	C22H26O6	Pinoresinol dimethy ether	松脂醇二甲醚	Lignans and Coumarins	木脂素和香豆素	Lignans	木脂素	29106-36-3	9	9	9	140720	312890	290070	1.4621	0.0443092	0.245995	27543.7	14.7494	up
pme2735	UPLC-MS/MS	C15H22N6O5S	S-Adenosyl-L-methionine	S-腺苷-L-蛋氨酸	Amino acids and derivatives	氨基酸及其衍生物	Amino acids and derivatives	氨基酸及其衍生物	29908-03-0	33057	85046	114150	1530.6	2877.8	5259.8	1.38613	0.0884817	0.30281	0.0416279	-4.58631	down
pmd0153	UPLC-MS/MS	C19H39O7P	LysoPA 16:0	溶血卵磷脂酸 16:0	Lipids	脂质	Glycerol ester	甘油酯	22002-85-3	149560	285030	161930	9	9	9	1.46201	0.0441881	0.245995	4.52625e-05	-14.4313	down
Lmhn001773	UPLC-MS/MS	C19H13NO10	Caffeoylnicotinoyltartaric acid	咖啡酰烟酰酒石酸	Phenolic acids	酚酸类	Phenolic acids	酚酸类	-	127810	68303	90869	4627.7	4812	29025	1.2769	0.0255468	0.209823	0.134032	-2.89935	down
Cmbn003192	UPLC-MS/MS	C18H24O11	Regaloside K	王百合苷K	Phenolic acids	酚酸类	Phenolic acids	酚酸类	138772-00-6	102580	278970	138950	9	10125	9	1.23952	0.0864807	0.30281	0.019487	-5.68134	down
Smgp109120	UPLC-MS/MS	C23H28O7	epimagnolin	epimagnolin	Lignans and Coumarins	木脂素和香豆素	Lignans	木脂素	-	9	9	9	1153900	1369300	762620	1.46156	0.0252916	0.209697	121697	16.8929	up
Lmbp003668	UPLC-MS/MS	C20H18O10	Kaempferol-3-O-arabinoside	山奈酚-3-O-阿拉伯糖苷	Flavonoids	黄酮	Flavonols	黄酮醇	-	9	12595	14012	9	9	9	1.03813	0.18466	0.415606	0.00101443	-9.94512	down
Zmbp003590	UPLC-MS/MS	C20H24O10	Rutarin	Rutarin	Lignans and Coumarins	木脂素和香豆素	Coumarins	香豆素	20320-81-4	10158	8930.2	3583.7	28089	48791	8612.7	1.01174	0.210075	0.44182	3.77087	1.9149	up
Lmhp008337	UPLC-MS/MS	C19H40NO7P	LysoPE 14:0(2n isomer)	溶血磷脂酰乙醇胺 14:0(2n异构)	Lipids	脂质	LPE	溶血磷脂酰乙醇胺	-	28997	51654	49673	24467	8830.2	11385	1.24599	0.037397	0.242405	0.342855	-1.54433	down
pmb0864	UPLC-MS/MS	C19H40NO7P	LysoPE 14:0	溶血磷脂酰乙醇胺 14:0	Lipids	脂质	LPE	溶血磷脂酰乙醇胺	-	26894	49791	56196	29288	8783	18634	1.08438	0.0859342	0.30281	0.426735	-1.22859	down
Lmhn204620	UPLC-MS/MS	C22H18O9	Bis(p-Coumaroyl)malic acid	二对香豆酰苹果酸	Phenolic acids	酚酸类	Phenolic acids	酚酸类	-	147250	111430	141460	9	9	9	1.46261	0.00685739	0.135044	6.74764e-05	-13.8553	down
Lmhn104620	UPLC-MS/MS	C22H18O9	p-Coumaroylcinnamoyltartaric acid	对香豆酰肉桂酰酒石酸	Phenolic acids	酚酸类	Phenolic acids	酚酸类	-	163230	129500	117680	9	9	9	1.46259	0.00980618	0.146727	6.57879e-05	-13.8918	down
Cmbn003996	UPLC-MS/MS	C19H26O11	Regaloside G	王百合苷G	Phenolic acids	酚酸类	Phenolic acids	酚酸类	120601-64-1	27608	42167	37560	8202.4	13167	10149	1.3999	0.0191685	0.192357	0.293645	-1.76785	down
pme0321	UPLC-MS/MS	C21H20O10	Kaempferol-7-O-rhamnoside	山奈酚-7-O-鼠李糖苷	Flavonoids	黄酮	Flavonols	黄酮醇	20196-89-8	58033	142510	267610	32213	9	9	1.15233	0.135736	0.361338	0.0688472	-3.86046	down
mws0045	UPLC-MS/MS	C21H20O11	Quercetin-3-O-rhamnoside(Quercitrin)	槲皮素-3-O-鼠李糖苷(槲皮苷)	Flavonoids	黄酮	Flavonols	黄酮醇	522-12-3	9	5616.8	2986	9	9	9	1.03639	0.219337	0.447002	0.00313523	-8.31721	down
Lmhp008763	UPLC-MS/MS	C21H42NO7P	LysoPE 16:1(2n isomer)	溶血磷脂酰乙醇胺 16:1(2n异构)	Lipids	脂质	LPE	溶血磷脂酰乙醇胺	-	82657	123660	201370	30725	4042.3	20658	1.25236	0.0713725	0.286215	0.135951	-2.87885	down
pmb0876	UPLC-MS/MS	C21H44NO7P	LysoPE 16:0	溶血磷脂酰乙醇胺 16:0	Lipids	脂质	LPE	溶血磷脂酰乙醇胺	53862-35-4	10161000	16970000	17515000	11727000	2379100	6238500	1.01655	0.0888037	0.30281	0.455687	-1.13389	down
pmd0160	UPLC-MS/MS	C21H44NO7P	LysoPE 16:0(2n isomer)	溶血磷脂酰乙醇胺 16:0(2n异构)	Lipids	脂质	LPE	溶血磷脂酰乙醇胺	-	1105300	1163000	2457700	781710	93270	427050	1.09463	0.106567	0.329058	0.275504	-1.85986	down
Lmdn006811	UPLC-MS/MS	C30H48O3	Soyasapogenol E	大豆皂醇 E	Terpenoids	萜类	Triterpene	三萜	6750-59-0	4522.8	4861.6	3626.4	9	9	9	1.46243	0.00717106	0.135456	0.0020752	-8.91253	down
pmn001700	UPLC-MS/MS	C30H48O3	24,30-Dihydroxy-12(13)-enolupinol	24,30-二羟基-12(13)烯羽扇豆醇	Terpenoids	萜类	Triterpene	三萜	-	4372	3617.4	5319.6	2258	729.15	1537.3	1.25544	0.0117539	0.160389	0.339954	-1.55659	down
mad2085	UPLC-MS/MS	C22H18O11	Caffeoyl-p-coumaroyltartaric acid	咖啡酰对香豆酰酒石酸	Phenolic acids	酚酸类	Phenolic acids	酚酸类	-	10150	22354	9890.2	9	9	9	1.45946	0.0753246	0.296004	0.00063688	-10.6167	down
MWSHY0035	UPLC-MS/MS	C21H18O12	Scutellarein-7-O-glucuronide (Scutellarin)	野黄芩素-7-O-葡萄糖醛酸苷 (野黄芩苷)	Flavonoids	黄酮	Flavones	黄酮	27740-01-8	3314.2	5845	11991	15682	62825	23856	1.18669	0.200789	0.431615	4.83981	2.27495	up
Lmdp003171	UPLC-MS/MS	C22H22O11	Azalein (Azaleatin-3-O-rhamnoside)	杜鹃黄苷	Flavonoids	黄酮	Flavonols	黄酮醇	29028-02-2	9	10591	127530	9	9	9	1.02049	0.376882	0.571388	0.000195468	-12.3208	down
pmp001309	UPLC-MS/MS	C21H20O12	6-Hydroxykaempferol-7-O-glucoside	6-羟基山奈酚-7-O-葡萄糖苷	Flavonoids	黄酮	Flavonols	黄酮醇	-	6091.4	3030.9	2222.3	16861	9264.3	74106	1.1964	0.284466	0.511922	8.83516	3.14326	up
Zmhn002545	UPLC-MS/MS	C22H24O11	4-O-(6'-O-Glucosylcaffeoyl)-3,4-dihydroxybenzyl alcohol	4-O-(6'-O-葡萄糖基咖啡酰)-3,4-二羟基苄醇	Phenolic acids	酚酸类	Phenolic acids	酚酸类	-	9	40840	8701	9	9	9	1.03082	0.315092	0.533256	0.000544904	-10.8417	down
pmd0130	UPLC-MS/MS	C22H46NO7P	LysoPC 14:0	溶血磷脂酰胆碱 14:0	Lipids	脂质	LPC	溶血磷脂酰胆碱	20559-16-4	343320	611330	376260	256620	224090	157760	1.24575	0.0991749	0.318462	0.479724	-1.05972	down
Hmmp002121	UPLC-MS/MS	C23H16O11	Isorhamnetin-3-O-gallate	异鼠李素-3-O-没食子酸酯	Flavonoids	黄酮	Flavonols	黄酮醇	-	9	9	10029	5917.2	11824	9333.8	1.01742	0.228153	0.451357	2.69483	1.4302	up
pmn001704	UPLC-MS/MS	C30H46O4	2,3-Dihydroxy-5(6),12(13)-diene-ursolic acid	2,3-二羟基-5(6),12(13)-二烯熊果酸	Terpenoids	萜类	Triterpene	三萜	-	8780.3	1961.6	9	9	9	9	1.02262	0.31099	0.530569	0.00251142	-8.63728	down
Lmzn006169	UPLC-MS/MS	C30H48O4	Pomolic acid	坡模酸	Terpenoids	萜类	Triterpene	三萜	13849-91-7	305800	527940	437730	1066400	1703900	568650	1.12999	0.166606	0.396645	2.62605	1.3929	up
Lmzn206284	UPLC-MS/MS	C30H48O4	Terminic acid	Terminic acid	Terpenoids	萜类	Triterpene	三萜	-	426910	484010	510340	9	9	9	1.46293	0.00269078	0.0833265	1.89972e-05	-15.6839	down
pmn001705	UPLC-MS/MS	C30H48O4	3,24-Dihydroxy-17,21-semiacetal-12(13)oleanolic fruit	3,24-二羟基-17,21-半缩醛基-12(13)齐墩果	Terpenoids	萜类	Triterpene	三萜	-	285160	480070	473210	1106700	1673800	664540	1.2167	0.122151	0.34817	2.78176	1.476	up
Lmgp002501	UPLC-MS/MS	C20H27NO12	Dhurrin-6'-O-Glucoside	蜀黍苷-6'-O-葡萄糖苷	Flavonoids	黄酮	Flavones	黄酮	-	34102	38313	30722	12539	1948.5	11065	1.18126	0.0046308	0.109934	0.247753	-2.01303	down
pmb1912	UPLC-MS/MS	C20H23N7O7	10-Formyltetrahydrofolic Acid	10-甲酰四氢叶酸	Alkaloids	生物碱	Alkaloids	生物碱	2800-34-2	1117600	737010	776030	2750600	1690700	1606900	1.28767	0.078425	0.297237	2.29914	1.20109	up
Lmhp008233	UPLC-MS/MS	C23H40NO7P	LysoPE 18:4	溶血磷脂酰乙醇胺 18:4	Lipids	脂质	LPE	溶血磷脂酰乙醇胺	-	9	6018.4	10745	9	9	9	1.03659	0.214207	0.442983	0.00160979	-9.27891	down
mws1714	UPLC-MS/MS	C22H18O12	Chicoric Acid	菊苣酸	Phenolic acids	酚酸类	Phenolic acids	酚酸类	70831-56-0	373200	246860	780740	1646000	1716100	1666300	1.31837	0.0160294	0.174816	3.58966	1.84385	up
Lmtn001569	UPLC-MS/MS	C20H29NO12	2-Glucosyl-glucosyloxy-2-phenylacetic acid amide	2-葡糖基-葡萄糖-2-苯基乙酸酰胺	Alkaloids	生物碱	Alkaloids	生物碱	-	25644	24329	38359	12747	10440	7586.8	1.36806	0.0392496	0.242405	0.348388	-1.52123	down
Lmhp008801	UPLC-MS/MS	C23H42NO7P	LysoPE 18:3	溶血磷脂酰乙醇胺 18:3	Lipids	脂质	LPE	溶血磷脂酰乙醇胺	-	9	9	9	19780	9	8395.8	1.03507	0.24303	0.466989	1043.88	10.0277	up
Hmjp003123	UPLC-MS/MS	C21H18O13	Quercetin-5-O-glucuronide	槲皮素-5-O-葡萄糖醛酸苷	Flavonoids	黄酮	Flavonols	黄酮醇	-	10894	3556.2	9	39230	120930	58562	1.04346	0.107525	0.330391	15.1268	3.91904	up
Lmfn003760	UPLC-MS/MS	C21H18O13	Quercetin-4'-O-glucuronide	槲皮素-4'-O-葡萄糖醛酸苷	Flavonoids	黄酮	Flavonols	黄酮醇	201463-36-7	9	9	9	9	47843	23354	1.04694	0.227921	0.451357	2637.26	11.3648	up
Hmcp002207	UPLC-MS/MS	C22H22O12	Isorhamnetin-7-O-glucoside (Brassicin)	异鼠李素-7-O-葡萄糖苷 (蔓菁苷)	Flavonoids	黄酮	Flavonols	黄酮醇	6743-96-0	6387	14358	35004	273590	238700	34929	1.15235	0.157021	0.384577	9.81576	3.2951	up
Lmjp003044	UPLC-MS/MS	C22H22O12	Isorhamnetin-3-O-Glucoside	异鼠李素-3-O-葡萄糖苷	Flavonoids	黄酮	Flavonols	黄酮醇	5041-82-7	9676	19255	51891	296750	257600	51421	1.16018	0.144691	0.37183	7.49513	2.90595	up
Lmjp002906	UPLC-MS/MS	C22H22O12	Rhamnetin-3-O-Glucoside	鼠李素-3-O-葡萄糖苷	Flavonoids	黄酮	Flavonols	黄酮醇	27875-34-9	12554	18320	48110	313040	279730	34054	1.07857	0.17172	0.401606	7.93609	2.98843	up
Lmpp003296	UPLC-MS/MS	C21H19O13+	Delphinidin-3-O-glucuronide	飞燕草素-3-O-葡萄糖醛酸苷	Flavonoids	黄酮	Anthocyanidins	花青素	-	18261	2539	5212.5	35924	130120	57515	1.26434	0.143392	0.370341	8.59429	3.10338	up
pmb2260	UPLC-MS/MS	C23H46NO7P	LysoPC 15:1	溶血磷脂酰胆碱 15:1	Lipids	脂质	LPC	溶血磷脂酰胆碱	-	101510	176610	119380	77361	31888	32740	1.25889	0.0425213	0.245829	0.357205	-1.48518	down
pmb2319	UPLC-MS/MS	C23H48NO7P	LysoPC 15:0	溶血磷脂酰胆碱 15:0	Lipids	脂质	LPC	溶血磷脂酰胆碱	108273-89-8	2173800	4340500	3273700	2372300	1229800	1071100	1.14035	0.095399	0.313939	0.477442	-1.0666	down
Lmhp009129	UPLC-MS/MS	C23H48NO7P	LysoPC 15:0(2n isomer)	溶血磷脂酰胆碱 15:0(2n异构)	Lipids	脂质	LPC	溶血磷脂酰胆碱	-	160920	286850	401760	113240	36633	47322	1.27728	0.0760122	0.296193	0.232122	-2.10704	down
pmb0883	UPLC-MS/MS	C23H48NO7P	LysoPE 18:0	溶血磷脂酰乙醇胺 18:0	Lipids	脂质	LPE	溶血磷脂酰乙醇胺	69747-55-3	67650	128700	137170	77037	23186	56278	1.02133	0.100658	0.320577	0.46924	-1.0916	down
pmb3066	UPLC-MS/MS	C22H26O12	5-O-p-Coumaroylshikimic acid O-glucoside	5-O-对香豆酰莽草酸-O-葡萄糖苷	Phenolic acids	酚酸类	Phenolic acids	酚酸类	-	11283	4553.5	5476.6	6790.1	9	9	1.04078	0.192999	0.420714	0.319433	-1.64642	down
Lmhp010254	UPLC-MS/MS	C27H34O8	Kadsuralignan J	日本南五味子木脂素 J	Lignans and Coumarins	木脂素和香豆素	Lignans	木脂素	-	9	9	9	22643	260740	50302	1.44458	0.277158	0.504532	12358.7	13.5932	up
pmp001142	UPLC-MS/MS	C24H29NO10	Cimicifugamide A	升麻酰胺 A	Alkaloids	生物碱	Phenolamine	酚胺	-	52896	38460	86307	158070	131910	117290	1.26727	0.0153454	0.171571	2.29237	1.19684	up
pmp001270	UPLC-MS/MS	C24H48NO7P	LysoPC 16:1	溶血磷脂酰胆碱 16:1	Lipids	脂质	LPC	溶血磷脂酰胆碱	76790-27-7	551750	647190	868690	311500	167390	239250	1.35194	0.0261764	0.212975	0.347325	-1.52564	down
Lmhp008833	UPLC-MS/MS	C24H48NO7P	LysoPC 16:1(2n isomer)	溶血磷脂酰胆碱 16:1(2n异构)	Lipids	脂质	LPC	溶血磷脂酰胆碱	-	475070	739480	1194200	64294	62742	145480	1.37443	0.0746976	0.295085	0.113136	-3.14387	down
Lmsn002937	UPLC-MS/MS	C22H22O13	1-O-Caffeoyl-6-O-galloyl-β-D-glucose	1-O-咖啡酰-6-O-没食子酰-β-D-葡萄糖	Phenolic acids	酚酸类	Phenolic acids	酚酸类	-	7792.2	8589.4	104450	331070	113070	178350	1.14545	0.105318	0.329058	5.15172	2.36505	up
pmd0132	UPLC-MS/MS	C24H50NO7P	LysoPC 16:0(2n isomer)	溶血磷脂酰胆碱 16:0(2n异构)	Lipids	脂质	LPC	溶血磷脂酰胆碱	-	2423900	2856700	5678900	1545300	675060	1028100	1.26317	0.120727	0.347402	0.296406	-1.75435	down
Lmgp003989	UPLC-MS/MS	C25H22O11	Dicaffeoylshikimic acid	二咖啡酰基莽草酸	Phenolic acids	酚酸类	Phenolic acids	酚酸类	-	10509000	21852000	11505000	972440	264520	3789200	1.23979	0.0601767	0.274454	0.11458	-3.12557	down
Lmsn002288	UPLC-MS/MS	C21H28O14	1-O-Caffeoyl-(6-O-glucosyl)-β-D-glucose	1-O-咖啡酰-6-O-葡萄糖基-β-D-葡萄糖	Phenolic acids	酚酸类	Phenolic acids	酚酸类	-	254190	298840	447270	217700	112980	109810	1.22966	0.064615	0.279246	0.440358	-1.18325	down
pme2125	UPLC-MS/MS	C18H32O16	Raffinose	棉子糖	Others	其它类	Saccharides and Alcohols	糖及醇类	512-69-6	137000	222370	132980	232860	322240	432870	1.20554	0.0852028	0.30281	2.00664	1.00478	up
mws1589	UPLC-MS/MS	C18H32O16	D-Panose	D-潘糖	Others	其它类	Saccharides and Alcohols	糖及醇类	33401-87-5	52918	34619	65013	77350	104800	143020	1.22477	0.0762566	0.296193	2.13156	1.09191	up
pmp001141	UPLC-MS/MS	C25H31NO10	Cimicifugamide	升麻酰胺	Alkaloids	生物碱	Phenolamine	酚胺	-	4281.5	6406.8	1240.4	25581	72481	18727	1.27374	0.173452	0.404021	9.79059	3.2914	up
Lmhp008718	UPLC-MS/MS	C25H48NO7P	LysoPC 17:2	溶血磷脂酰胆碱 17:2	Lipids	脂质	LPC	溶血磷脂酰胆碱	-	90164	198630	95792	82071	38945	48878	1.12808	0.169595	0.399874	0.441758	-1.17867	down
Hmln002199	UPLC-MS/MS	C23H22O13	Quercetin-3-O-(6''-O-acetyl)galactoside	槲皮素-3-O-(6''-O-乙酰)半乳糖苷	Flavonoids	黄酮	Flavonols	黄酮醇	-	168120	43395	133940	10508	37780	15274	1.21385	0.12121	0.347402	0.183995	-2.44226	down
pmb2406	UPLC-MS/MS	C25H52NO7P	LysoPC 17:0	溶血磷脂酰胆碱 17:0	Lipids	脂质	LPC	溶血磷脂酰胆碱	50930-23-9	45194	86574	115710	18386	10041	21413	1.32807	0.0806238	0.299617	0.201392	-2.31192	down
Lmhp010515	UPLC-MS/MS	C25H52NO7P	LysoPC 17:0(2n isomer)	溶血磷脂酰胆碱 17:0(2n异构)	Lipids	脂质	LPC	溶血磷脂酰胆碱	-	44148	92967	91041	26151	19581	22101	1.34054	0.0767851	0.296254	0.29731	-1.74996	down
Lmhp009773	UPLC-MS/MS	C27H46O9	1-α-Linolenoyl-glycerol-3-O-glucoside	1-α-亚麻酸甘油酯-3-O-葡萄糖苷	Lipids	脂质	Glycerol ester	甘油酯	-	8258.1	3642.2	5567.2	9	2065.6	9	1.15019	0.0425554	0.245829	0.119284	-3.06752	down
Hmqp006235	UPLC-MS/MS	C26H46NO7P	LysoPC 18:4	溶血磷脂酰胆碱 18:4	Lipids	脂质	LPC	溶血磷脂酰胆碱	-	84427	187470	284480	18539	11265	20582	1.38141	0.0996402	0.31918	0.0905609	-3.46497	down
MWSmce346	UPLC-MS/MS	C25H24O12	1,3-O-Dicaffeoylquinic Acid (Cynarin)	1,3-O-双咖啡酰奎宁酸(洋蓟酸)	Phenolic acids	酚酸类	Phenolic acids	酚酸类	30964-13-7	30960000	47510000	22938000	2129600	840560	9076600	1.26123	0.0419252	0.243814	0.118795	-3.07345	down
MWSmce328	UPLC-MS/MS	C25H24O12	Isochlorogenic acid C	异绿原酸 C	Phenolic acids	酚酸类	Phenolic acids	酚酸类	57378-72-0	31272000	46885000	23725000	2067400	809350	8922200	1.26501	0.035355	0.241686	0.11581	-3.11017	down
Li512115	UPLC-MS/MS	C25H24O12	Isochlorogenic acid B	异绿原酸 B	Phenolic acids	酚酸类	Phenolic acids	酚酸类	14534-61-3	1228600	3298000	1058000	94454	17802	385340	1.21584	0.139571	0.36648	0.0891015	-3.48841	down
pmn001382	UPLC-MS/MS	C25H24O12	Isochlorogenic acid A	异绿原酸 A	Phenolic acids	酚酸类	Phenolic acids	酚酸类	2450-53-5	1493800	3342400	1249300	94643	28781	518790	1.22275	0.104141	0.327545	0.105532	-3.24425	down
Lmhp010334	UPLC-MS/MS	C27H48O9	2-Linoleoylglycerol-1-O-glucoside	2-亚油酰甘油酯-1-O-葡萄糖苷	Lipids	脂质	Glycerol ester	甘油酯	-	33609	37641	19449	4930.4	7654	9378.8	1.35492	0.0469548	0.250377	0.242155	-2.046	down
Lmhp010573	UPLC-MS/MS	C27H48O9	1-Linoleoylglycerol-3-O-glucoside	1-亚油酰甘油酯-3-O-葡萄糖苷	Lipids	脂质	Glycerol ester	甘油酯	-	7758.6	19305	19336	6333.9	2022.7	4527.4	1.20185	0.0895327	0.304122	0.277675	-1.84853	down
pmb0865	UPLC-MS/MS	C26H48NO7P	LysoPC 18:3(2n isomer)	溶血磷脂酰胆碱 18:3(2n异构)	Lipids	脂质	LPC	溶血磷脂酰胆碱	-	234310	248430	119800	91558	34301	93941	1.15549	0.0699254	0.283796	0.364789	-1.45487	down
pmb0854	UPLC-MS/MS	C26H48NO7P	LysoPC 18:3	溶血磷脂酰胆碱 18:3	Lipids	脂质	LPC	溶血磷脂酰胆碱	-	259740	427730	252710	145580	20713	73582	1.17908	0.0340449	0.237115	0.255137	-1.97065	down
pmp000531	UPLC-MS/MS	C26H30O11	Phellamurin	黄柏苷	Flavonoids	黄酮	Flavanonols	二氢黄酮醇	52589-11-4	876020	365610	878030	81323	105620	69164	1.39841	0.0671915	0.283268	0.120825	-3.04901	down
Smhp002357	UPLC-MS/MS	C26H30O11	tortoside f	tortoside f	Lignans and Coumarins	木脂素和香豆素	Lignans	木脂素	-	377240	239870	411980	37034	51492	30911	1.43357	0.0273889	0.21575	0.116061	-3.10705	down
pmp001251	UPLC-MS/MS	C26H50NO7P	LysoPC 18:2(2n isomer)	溶血磷脂酰胆碱 18:2(2n异构)	Lipids	脂质	LPC	溶血磷脂酰胆碱	-	48001000	79621000	69250000	24357000	22015000	17876000	1.40018	0.0370082	0.242405	0.326344	-1.61553	down
Li512111	UPLC-MS/MS	C24H24O13	Isorhamnetin-3-O-(6''-acetylglucoside)	异鼠李素-3-O-(6''-乙酰)葡萄糖苷	Flavonoids	黄酮	Flavonols	黄酮醇	-	100970	206280	869520	8466000	10668000	1443300	1.24139	0.144645	0.37183	17.4863	4.12815	up
Zmcp102703	UPLC-MS/MS	C26H32O11	saikolignanoside D	柴胡木脂素苷D	Lignans and Coumarins	木脂素和香豆素	Lignans	木脂素	-	11082000	6416300	6261900	1824900	1550700	1886900	1.41165	0.0593568	0.272852	0.221484	-2.17473	down
Cmsp003083	UPLC-MS/MS	C26H32O11	Dehydrodiconiferyl alcohol-4-O-glucoside	脱氢二十二烷醇-4-O-葡萄糖苷	Others	其它类	Others	其它	107870-88-2	9787600	6766800	7076800	1765200	1320400	1978300	1.42644	0.0198089	0.193948	0.214289	-2.22237	down
Lmsp003655	UPLC-MS/MS	C26H32O11	Dehydrodiconiferyl alcohol-gamma'-O-glucoside	脱氢二松柏醇-γ'-O-葡萄糖苷	Phenolic acids	酚酸类	Phenolic acids	酚酸类	-	9803400	6258500	6940200	1998900	1657700	1914100	1.43061	0.0322316	0.232739	0.242182	-2.04584	down
pmn001710	UPLC-MS/MS	C24H26O13	Rosmarinic acid-3'-O-glucoside	迷迭香酸-3'-O-葡萄糖苷	Phenolic acids	酚酸类	Phenolic acids	酚酸类	910028-78-3	174820	101660	76328	52895	55978	58103	1.1887	0.170499	0.40067	0.473277	-1.07924	down
Cmsp005051	UPLC-MS/MS	C26H34O11	Isolariciresinol-9-O-glucoside	异落叶松脂素-9-O-葡萄糖苷	Lignans and Coumarins	木脂素和香豆素	Lignans	木脂素	-	304470	343020	398690	94349	119170	116220	1.43607	0.00866738	0.144429	0.315184	-1.66573	down
Jmzn003343	UPLC-MS/MS	C26H34O11	Saikolignanoside A	Saikolignanoside A	Lignans and Coumarins	木脂素和香豆素	Lignans	木脂素	-	187280	54369	46364	416100	127720	550280	1.08833	0.153024	0.381126	3.79879	1.92554	up
Lmtn003096	UPLC-MS/MS	C26H36O11	Secoisolariciresinol 4-O-glucoside	开环异落叶松脂酚-4-O-葡萄糖苷	Lignans and Coumarins	木脂素和香豆素	Lignans	木脂素	-	628300	697740	880360	605680	232110	165210	1.1273	0.0799866	0.298743	0.454587	-1.13737	down
Lmjp003822	UPLC-MS/MS	C26H26O12	3,5-O-Dicaffeoylquinic Acid Methyl Ester	3,5-O-双咖啡酰奎宁酸甲酯	Phenolic acids	酚酸类	Phenolic acids	酚酸类	159934-13-1	4842500	9836300	3807600	70673	50967	469190	1.35558	0.0843304	0.30281	0.0319603	-4.96758	down
Zmcn005156	UPLC-MS/MS	C26H26O12	4,5-O-Dicaffeoylquinic Acid Methyl Ester	4,5-二咖啡酰奎宁酸甲酯	Phenolic acids	酚酸类	Phenolic acids	酚酸类	-	1906900	4866700	1757300	31197	34152	121030	1.40378	0.110762	0.337348	0.0218475	-5.51639	down
Lmjp003731	UPLC-MS/MS	C26H26O12	3,4-O-Dicaffeoylquinic Acid Methyl Ester	3,4-O-双咖啡酰奎宁酸甲酯	Phenolic acids	酚酸类	Phenolic acids	酚酸类	-	4071600	7802900	4129200	75272	48479	454560	1.35826	0.0516113	0.261637	0.0361361	-4.79042	down
MWStz043	UPLC-MS/MS	C26H26O12	3,4-Di-O-caffeoylquinic acid methyl ester	3,4-O-二咖啡酰基奎宁酸甲酯	Phenolic acids	酚酸类	Phenolic acids	酚酸类	114637-83-1	1309200	3057900	1280700	34607	18352	33197	1.44241	0.0874964	0.30281	0.0152548	-6.03459	down
Lmhp007598	UPLC-MS/MS	C27H52NO7P	LysoPC 19:2(2n isomer)	溶血磷脂酰胆碱 19:2(2n异构)	Lipids	脂质	LPC	溶血磷脂酰胆碱	-	56139	188020	152050	3519.8	5616.8	3826.5	1.42389	0.083205	0.30281	0.0327178	-4.93378	down
Lmhp007840	UPLC-MS/MS	C27H52NO7P	LysoPC 19:2	溶血磷脂酰胆碱 19:2	Lipids	脂质	LPC	溶血磷脂酰胆碱	-	38839	93469	111340	8917.8	16005	3890.9	1.32947	0.0779933	0.296736	0.11826	-3.07997	down
Lmhp010908	UPLC-MS/MS	C27H54NO7P	LysoPC 19:1	溶血磷脂酰胆碱 19:1	Lipids	脂质	LPC	溶血磷脂酰胆碱	-	363310	373520	370080	130320	82597	95528	1.43519	0.00200912	0.0745784	0.278654	-1.84345	down
pmn001375	UPLC-MS/MS	C26H32O12	1-Hydroxypinoresinol-1-O-Glucoside	1-羟基松脂醇-1-O-葡萄糖苷	Lignans and Coumarins	木脂素和香豆素	Lignans	木脂素	81495-71-8	200180	232740	162910	110690	9	9	1.0929	0.0293083	0.224076	0.185805	-2.42814	down
Hmln002100	UPLC-MS/MS	C26H32O12	Nortrachelogenin-4-O-glucoside	去甲络石苷元-4-O-葡萄糖苷	Lignans and Coumarins	木脂素和香豆素	Lignans	木脂素	33464-78-7	302840	259050	522360	65869	20676	245770	1.05601	0.0802317	0.299014	0.306493	-1.70607	down
Lmdn001925	UPLC-MS/MS	C26H34O12	Olivil-4'-O-glucoside	橄榄树脂素-4'-O-葡萄糖苷	Lignans and Coumarins	木脂素和香豆素	Lignans	木脂素	76880-93-8	24678	40886	63695	3144.5	3572.2	4990.2	1.41274	0.0738933	0.293037	0.0905693	-3.46483	down
Lmhp008742	UPLC-MS/MS	C28H48NO7P	LysoPC 20:5	溶血磷脂酰胆碱 20:5	Lipids	脂质	LPC	溶血磷脂酰胆碱	162440-04-2	106880	383920	216610	63354	15954	8272.7	1.2644	0.118511	0.344813	0.123805	-3.01386	down
pmc0960	UPLC-MS/MS	C28H50NO7P	LysoPC 20:4	溶血磷脂酰胆碱 20:4	Lipids	脂质	LPC	溶血磷脂酰胆碱	-	107950	866340	683740	101310	19426	41891	1.18569	0.159494	0.386296	0.0980845	-3.34983	down
pmp000589	UPLC-MS/MS	C24H22O15	Quercetin-7-O-(6''-malonyl)glucoside	槲皮素-7-O-(6''-丙二酰)葡萄糖苷	Flavonoids	黄酮	Flavonols	黄酮醇	-	468920	162190	260230	36837	146500	28270	1.18331	0.114332	0.341615	0.237403	-2.07459	down
mws1138	UPLC-MS/MS	C24H26N2O13	Betanin (Betanidin-5-O-glucoside)	甜菜红苷 (甜菜苷-5-O-葡萄糖苷)	Alkaloids	生物碱	Plumerane	吲哚类生物碱	7659-95-2	520700	147340	252480	41038	119250	30872	1.21272	0.153553	0.381126	0.207665	-2.26767	down
pmn001365	UPLC-MS/MS	C27H24O13	Salvianolic acid K	丹酚酸 K	Phenolic acids	酚酸类	Phenolic acids	酚酸类	203733-40-8	97194	30108	77846	250140	198490	152570	1.21708	0.0226951	0.204806	2.93057	1.55118	up
Rfmb25702	UPLC-MS/MS	C28H34O12	Pinoresinol-4-O-(6''-acetyl)glucoside	松脂醇-4-O-(6''-乙酰)葡萄糖苷	Lignans and Coumarins	木脂素和香豆素	Lignans	木脂素	-	36463	30265	29336	21096	6940.2	3625.5	1.18255	0.0415209	0.243094	0.32959	-1.60126	down
HJAP064	UPLC-MS/MS	C25H24O15	Isorhamnetin-3-O-(6''-malonyl)glucoside	异鼠李素-3-O-(6''-丙二酰)葡萄糖苷	Flavonoids	黄酮	Flavonols	黄酮醇	-	252240	1051200	2447700	19524000	23541000	2941700	1.16438	0.153723	0.381126	12.2647	3.61644	up
Zmhp005139	UPLC-MS/MS	C25H24O15	Tamarixetin-3-O-(6''-malonyl)glucoside	柽柳黄素-3-O-(6''-丙二酰)葡萄糖苷	Flavonoids	黄酮	Flavonols	黄酮醇	-	237310	1055600	2908000	19161000	24073000	3359200	1.1582	0.150116	0.3795	11.0912	3.47135	up
Lmnp202580	UPLC-MS/MS	C26H28O14	Apigenin-8-C-(2''-xylosyl)glucoside	芹菜素-8-C-(2''-木糖基)葡萄糖苷	Flavonoids	黄酮	Flavonoid carbonoside	黄酮碳糖苷	-	24154	51226	120240	28589	9	9	1.0963	0.182789	0.414243	0.146238	-2.77361	down
Lmnp102580	UPLC-MS/MS	C26H28O14	Apigenin-6-C-(2''-xylosyl)glucoside	芹菜素-6-C-(2''-木糖基)葡萄糖苷	Flavonoids	黄酮	Flavonoid carbonoside	黄酮碳糖苷	-	147100	317710	876040	156130	102710	12536	1.02475	0.244299	0.468329	0.202391	-2.30478	down
Lmmp006709	UPLC-MS/MS	C30H26O12	Kaempferol-3-O-(4''-p-coumaroyl)rhamnoside	山奈酚-3-O-(4''-对香豆酰基)鼠李糖苷	Flavonoids	黄酮	Flavonols	黄酮醇	-	9	9	9	6229.1	12256	10744	1.46139	0.0328928	0.235686	1082.56	10.0802	up
MWSHY0201	UPLC-MS/MS	C27H30O14	Kaempferol-3,7-O-dirhamnoside (Kaempferitrin)	山奈酚-3,7-O-二鼠李糖苷 (山奈苷)	Flavonoids	黄酮	Flavonols	黄酮醇	482-38-2	8060.8	5382.8	80592	1793	896.25	894.25	1.21619	0.34561	0.551512	0.0381079	-4.71377	down
HJAP148	UPLC-MS/MS	C26H28O15	Kaempferol-3-O-sambubioside	山奈酚-3-O-桑布双糖苷	Flavonoids	黄酮	Flavonols	黄酮醇	27661-51-4	28654	41491	310840	9	9	9	1.44349	0.301519	0.52149	7.08689e-05	-13.7845	down
Rfmb056	UPLC-MS/MS	C29H36O13	medioresinol-4'-O-(6'''-acetyl)glucoside	杜仲树脂酚-4'-O-(6'''-乙酰)葡萄糖苷	Lignans and Coumarins	木脂素和香豆素	Lignans	木脂素	-	125060	134280	52260	17343	49935	29851	1.17709	0.0967223	0.3152	0.311711	-1.68172	down
Lmdn004868	UPLC-MS/MS	C29H36O13	Jionoside C	焦地黄苯乙醇苷 C	Phenolic acids	酚酸类	Phenolic acids	酚酸类	120406-33-9	6014	9	5803.8	9	9	9	1.03019	0.183633	0.414828	0.00228295	-8.77488	down
mws1290	UPLC-MS/MS	C30H26O13	Kaempferol-3-O-(6''-p-Coumaroyl)glucoside (Tiliroside)	山奈酚-3-O-(6''-对香豆酰)葡萄糖苷 (银锻苷)	Flavonoids	黄酮	Flavones	黄酮	20316-62-5	6078.3	6176.1	15360	9	9	9	1.45705	0.0961352	0.314369	0.000977751	-9.99825	down
Zmcp003989	UPLC-MS/MS	C27H30O15	Kaempferol-3-O-rhamnosyl(1→2)glucoside	山奈酚-3-O-鼠李糖基(1→2)葡萄糖苷	Flavonoids	黄酮	Flavonols	黄酮醇	-	29293	72893	528900	17917	15079	9472.5	1.11311	0.344322	0.551512	0.0672943	-3.89337	down
pmp001106	UPLC-MS/MS	C27H30O15	Vitexin-2''-O-glucoside	牡荆素-2''-O-葡萄糖苷	Flavonoids	黄酮	Flavonoid carbonoside	黄酮碳糖苷	61360-94-9	32673	30577	22098	365020	190360	184440	1.4185	0.0660331	0.281168	8.66828	3.11575	up
Lmnp202682	UPLC-MS/MS	C27H30O15	5,7,4'-Trihydroxy-8-methoxyflavone-6-C-[Xylosyl-(1-2)]-glucoside	5,7,4'-三羟基-8-甲氧基黄酮-6-C-[木糖-(1-2)]-葡萄糖苷	Flavonoids	黄酮	Flavonoid carbonoside	黄酮碳糖苷	-	8667.8	9	28078	9	9	9	1.02569	0.278115	0.505212	0.000734598	-10.4108	down
mws1073	UPLC-MS/MS	C27H30O15	Apigenin-6,8-di-C-glucoside (Vicenin-2)	芹菜素-6,8-二-C-葡萄糖苷 (新西兰牡荆苷 II)	Flavonoids	黄酮	Flavonoid carbonoside	黄酮碳糖苷	23666-13-9	232190	184230	185570	2181400	1387400	1193900	1.43248	0.0439836	0.245995	7.91159	2.98397	up
Hmmp003156	UPLC-MS/MS	C27H30O15	Saponarin(Isovitexin-7-O-glucoside)	皂草苷(异牡荆素-7-O-葡萄糖苷)	Flavonoids	黄酮	Flavones	黄酮	20310-89-8	9	9	9	20204	42951	7670.5	1.44774	0.149635	0.3795	2623.17	11.3571	up
mws0791	UPLC-MS/MS	C28H34O14	Poncirin (Isosakuranetin-7-O-neohesperidoside)	枸橘苷	Flavonoids	黄酮	Flavanones	二氢黄酮	14941-08-3	3929.1	9432.9	9838.9	9	9	9	1.45758	0.0558254	0.26964	0.00116375	-9.74701	down
Lmjp002596	UPLC-MS/MS	C26H28O16	Quercetin-3-O-sambubioside	槲皮素-3-O-桑布双糖苷	Flavonoids	黄酮	Flavonols	黄酮醇	83048-35-5	7572.5	7027	34558	3314.2	3454	4675.7	1.08301	0.300624	0.520951	0.232801	-2.10283	down
pmp000686	UPLC-MS/MS	C28H34O15	Forsythiaside J	连翘酯苷 J	Phenolic acids	酚酸类	Phenolic acids	酚酸类	-	55783	34791	30165	9037.7	4413.2	621.04	1.25037	0.0362808	0.241686	0.116548	-3.101	down
Lhcp102425	UPLC-MS/MS	C36H58O8	Prosaikogenin G	前柴胡皂苷元G	Terpenoids	萜类	Triterpene Saponin	三萜皂苷	-	2245900	1722000	2262600	9	9	9	1.46272	0.0072241	0.135456	4.33352e-06	-17.816	down
Lhcp102427	UPLC-MS/MS	C36H58O8	3-O-β-D-Fucopyranosyl saikogenin F(iso-02)	前柴胡皂苷元F(iso-02)	Terpenoids	萜类	Triterpene Saponin	三萜皂苷	-	633140	992600	610600	9	9	9	1.46257	0.026469	0.213353	1.20733e-05	-16.3378	down
Rfmb26201	UPLC-MS/MS	C30H38O14	Syringaresinol-4'-O-(6''-acetyl)glucoside	丁香树脂酚-4'-O-(6''-乙酰)葡萄糖苷	Lignans and Coumarins	木脂素和香豆素	Lignans	木脂素	-	1289900	928720	554270	230330	270350	605140	1.12197	0.102643	0.324007	0.398797	-1.32627	down
HJN051	UPLC-MS/MS	C28H32O16	Tamarixetin-3-O-rutinoside	柽柳黄素-3-O-芸香糖苷	Flavonoids	黄酮	Flavonols	黄酮醇	-	22175	45006	708500	3029300	2643200	1380900	1.20936	0.0357043	0.241686	9.09317	3.18478	up
Hmlp004943	UPLC-MS/MS	C28H32O16	Nitensoside B	Nitensoside B	Lignans and Coumarins	木脂素和香豆素	Coumarins	香豆素	-	3422.2	6844.2	138690	482240	415860	297330	1.19619	0.00834788	0.143236	8.02537	3.00457	up
Lmsp003939	UPLC-MS/MS	C28H32O16	Isorhamnetin-3-O-galactoide-7-O-rhamnoside	异鼠李素-3-O-半乳糖苷-7-O-鼠李糖苷	Flavonoids	黄酮	Flavonols	黄酮醇	-	136410	378590	532770	1351000	782680	685270	1.10952	0.0853457	0.30281	2.69043	1.42784	up
Lmsp004045	UPLC-MS/MS	C28H32O16	Isorhamnetin-3-O-glucoside-7-O-rhamnoside	异鼠李素-3-O-葡萄糖苷-7-O-鼠李糖苷	Flavonoids	黄酮	Flavonols	黄酮醇	-	137050	340430	563980	1161500	579650	900890	1.09428	0.0683538	0.283268	2.53686	1.34304	up
pmb0603	UPLC-MS/MS	C28H32O16	Chrysoeriol-7,4'-di-O-glucoside	金圣草黄素-7,4'-二-O-葡萄糖苷	Flavonoids	黄酮	Flavones	黄酮	-	9	9	15394	49168	41936	42730	1.12931	0.00767004	0.136864	8.68375	3.11832	up
Lmmp002463	UPLC-MS/MS	C28H32O16	Sexangularetin-3-O-glucoside-7-O-rhamnoside	3,5,7,4'-四羟基-8-甲氧基黄酮-3-O-葡萄糖苷-7-O-鼠李糖苷	Flavonoids	黄酮	Flavonols	黄酮醇	-	2573.2	9384.2	111050	470280	453500	288910	1.21426	0.00990597	0.146727	9.85868	3.30139	up
Lmsp004721	UPLC-MS/MS	C28H32O16	Tamarixetin-3-O-glucoside-7-O-rhamnoside	柽柳黄素-3-O-葡萄糖苷-7-O-鼠李糖苷	Flavonoids	黄酮	Flavonols	黄酮醇	-	4287	13583	123270	452460	498770	285420	1.21796	0.0139216	0.164254	8.76187	3.13124	up
pme1540	UPLC-MS/MS	C28H32O16	Isorhamnetin-3-O-neohesperidoside	异鼠李素-3-O-新橙皮糖苷	Flavonoids	黄酮	Flavonols	黄酮醇	55033-90-4	32803	76870	91242	277070	163070	180920	1.24983	0.0397493	0.242405	3.09116	1.62815	up
MWSHY0135	UPLC-MS/MS	C28H32O16	Isorhamnetin-3-O-rutinoside (Narcissin)	异鼠李素-3-O-芸香糖苷 (水仙苷)	Flavonoids	黄酮	Flavones	黄酮	604-80-8	4274.8	5089	114610	436010	595290	301730	1.23621	0.0271726	0.21575	10.7525	3.4266	up
Lmhp003217	UPLC-MS/MS	C28H32O16	2'-Hydoxy,5-methoxyGenistein-O-rhamnosyl-glucoside	2'-羟基-5-甲氧基染料木素-O-鼠李糖-葡萄糖	Flavonoids	黄酮	Isoflavones	异黄酮	-	5146.5	1633	141140	436240	485990	322430	1.17888	0.00544691	0.122591	8.41444	3.07287	up
HJAP026	UPLC-MS/MS	C28H32O16	Chrysoeriol-6-C-glucoside-4'-O-glucoside	金圣草黄素-6-C-葡萄糖苷-4'-O-葡萄糖苷	Flavonoids	黄酮	Flavonoid carbonoside	黄酮碳糖苷	-	42404	82717	150750	380830	201990	270190	1.21201	0.0448217	0.246591	3.09206	1.62857	up
Lmcn005735	UPLC-MS/MS	C29H36O15	Methylhesperidin	甲基橙皮苷	Flavonoids	黄酮	Flavones	黄酮	11013-97-1	9	9	9	16141	9	18414	1.04012	0.185266	0.415889	1280.15	10.3221	up
pmp001311	UPLC-MS/MS	C27H30O17	6-Hydroxykaempferol-7,6'-O-Diglucoside	6-羟基山奈酚-7,6'-O-二葡萄糖苷	Flavonoids	黄酮	Flavonols	黄酮醇	-	20002	41027	20311	3691.9	14284	12114	1.07998	0.117841	0.344813	0.369927	-1.43469	down
pmb0645	UPLC-MS/MS	C28H34O16	Hesperetin-6-C-glucoside-7-O-glucoside	橙皮素-6-C-葡萄糖苷-7-O-葡萄糖苷	Flavonoids	黄酮	Flavonoid carbonoside	黄酮碳糖苷	-	9	9	9	7797.4	9	2097.1	1.02717	0.292834	0.518368	366.796	8.51884	up
Hmcp001578	UPLC-MS/MS	C28H32O17	Isorhamnetin-3,7-O-diglucoside	异鼠李素-3,7-O-二葡萄糖苷	Flavonoids	黄酮	Flavonols	黄酮醇	6758-51-6	5431.8	41124	80776	1160000	397710	72738	1.06508	0.259873	0.485303	12.8047	3.6786	up
Lmhp002800	UPLC-MS/MS	C28H32O17	2'-Hydoxy,5-methoxyGenistein-4',7-O-diglucoside	2'-羟基-5-甲氧基染料木素-4',7-O-二葡萄糖	Flavonoids	黄酮	Isoflavones	异黄酮	-	3685	7438.5	5457.5	25028	19554	9104.5	1.21276	0.111187	0.338048	3.23783	1.69503	up
Lmsp003252	UPLC-MS/MS	C28H32O17	Isorhamnetin-3-O-sophoroside	异鼠李素-3-O-槐糖苷	Flavonoids	黄酮	Flavonols	黄酮醇	-	8163.8	85395	132750	2552200	1089100	182450	1.12157	0.224255	0.449288	16.8962	4.07862	up
HJN102	UPLC-MS/MS	C34H30O15	3,4,5-Tricaffeoylquinic acid	3,4,5-三咖啡酰奎宁酸	Phenolic acids	酚酸类	Phenolic acids	酚酸类	86632-03-3	267420	768340	457630	12996	10469	32224	1.40575	0.081281	0.300341	0.0372903	-4.74505	down
Lmgn002250	UPLC-MS/MS	C31H34O17	Dicaffeoylquinic acid-O-glucoside	二咖啡酰基奎宁酸-O-葡萄糖苷	Phenolic acids	酚酸类	Phenolic acids	酚酸类	-	637380	383380	951970	296170	88320	384720	1.02471	0.118872	0.344813	0.389922	-1.35874	down
Lmyn006011	UPLC-MS/MS	C33H58O14	Gingerglycolipid B	姜糖脂 B	Lipids	脂质	Glycerol ester	甘油酯	88168-90-5	39178	54563	52380	210960	110620	211670	1.3693	0.0587742	0.272246	3.64937	1.86765	up
pmn001370	UPLC-MS/MS	C32H42O16	Pinoresinol-4,4'-O-di-O-glucoside	松脂醇-4,4'-O-二-O-葡萄糖苷	Lignans and Coumarins	木脂素和香豆素	Lignans	木脂素	63902-38-5	348200	222420	371220	139680	111570	99618	1.36679	0.0435796	0.245995	0.372535	-1.42455	down
Hmsn003050	UPLC-MS/MS	C37H58O12	Esculentoside D	商陆皂苷 D	Terpenoids	萜类	Triterpene Saponin	三萜皂苷	89808-50-4	401110	827920	93390	9	9	9	1.45242	0.174329	0.404402	2.04171e-05	-15.5799	down
Hmcp001947	UPLC-MS/MS	C31H34O19	Isorhamnetin-3-O-(6''-malonyl)glucoside-7-O-rhamnoside	异鼠李素-3-O-(6''-丙二酰)葡萄糖苷-7-O-鼠李糖苷	Flavonoids	黄酮	Flavonols	黄酮醇	-	114400	340660	365860	1228000	661200	630460	1.1748	0.0844091	0.30281	3.06931	1.61792	up
Hmcp001658	UPLC-MS/MS	C31H34O20	Isorhamnetin-3-O-(6''-malonyl)glucoside-7-O-glucoside	异鼠李素-3-O-(6''-丙二酰)葡萄糖苷-7-O-葡萄糖苷	Flavonoids	黄酮	Flavonols	黄酮醇	-	7191.9	204590	156470	2514800	1136000	216250	1.02785	0.222172	0.447028	10.5011	3.39247	up
Xmyp004678	UPLC-MS/MS	C32H38O19	Kaempferol-3-O-(2-O-Xylosyl-6-O-Rhamnosyl)Glucoside	山奈酚-3-O-(2''-O-木糖基-6''-O-鼠李糖基)葡萄糖苷	Flavonoids	黄酮	Flavonols	黄酮醇	-	2840.5	12167	11766	2847	9	9	1.14245	0.109536	0.33479	0.107009	-3.2242	down
mws1035	UPLC-MS/MS	C33H40O19	Kaempferol-3-O-robinoside-7-O-rhamnoside (Robinin)	山奈酚-3-O-刺槐糖苷-7-O-鼠李糖苷 (刺槐苷)	Flavonoids	黄酮	Flavonols	黄酮醇	301-19-9	19751	19037	34526	9018	9129.8	17656	1.12522	0.115467	0.342646	0.488362	-1.03398	down
pme2651	UPLC-MS/MS	C21H28N7O17P3	NADP (Nicotinamide adenine dinucleotide phosphate)	烟酰胺腺嘌呤二核苷酸磷酸	Nucleotides and derivatives	核苷酸及其衍生物	Nucleotides and derivatives	核苷酸及其衍生物	53-59-8	46911	55251	46764	98304	126220	138700	1.41981	0.0220615	0.202611	2.43896	1.28626	up
pmn001505	UPLC-MS/MS	C41H64O13	Oleanolic acid-3-O-xylosyl(1→3)glucuronide	齐墩果酸-3-O-木糖基(1→3)葡萄糖醛酸苷	Terpenoids	萜类	Triterpene Saponin	三萜皂苷	-	1589900	351600	768580	9	9	9	1.45816	0.131028	0.357941	9.96281e-06	-16.615	down
Zmcp102707	UPLC-MS/MS	C42H68O12	Saikosaponin E	柴胡皂苷E	Terpenoids	萜类	Triterpene Saponin	三萜皂苷	-	185770	195670	539570	9	9	9	1.45963	0.118565	0.344813	2.93156e-05	-15.058	down
HJAP119	UPLC-MS/MS	C34H42O20	Rhamnetin-3-O-Rutinoside-5-O-rhamnoside	鼠李素-3-O-芸香糖苷-5-O-鼠李糖苷	Flavonoids	黄酮	Flavonols	黄酮醇	-	14612	75929	70864	457620	230270	326330	1.26941	0.0404598	0.242405	6.2837	2.65161	up
pmb0592	UPLC-MS/MS	C34H42O20	Chrysoeriol-7-O-rutinoside-5-O-glucoside	金圣草黄素-7-O-芸香糖苷-5-O-葡萄糖苷	Flavonoids	黄酮	Flavones	黄酮	-	46191	128680	102900	671090	362910	420180	1.34154	0.0460943	0.248347	5.23518	2.38824	up
MWSHY0122	UPLC-MS/MS	C34H42O20	Typhaneoside	香蒲新苷	Flavonoids	黄酮	Flavones	黄酮	104472-68-6	24524	90357	114110	457470	321150	276690	1.2527	0.0212119	0.199595	4.60852	2.2043	up
Lmmp002334	UPLC-MS/MS	C33H40O21	Quercetin-3-O-rutinoside-7-O-glucoside	槲皮素-3-O-芸香糖苷-7-O-葡萄糖苷	Flavonoids	黄酮	Flavonols	黄酮醇	-	9009	3777.2	3841.2	1058.2	9	740.25	1.05513	0.0998827	0.319367	0.108703	-3.20153	down
pmn001331	UPLC-MS/MS	C42H66O13	16-Keto-saikosaponin A	16-羰基-柴胡皂苷 A	Terpenoids	萜类	Triterpene Saponin	三萜皂苷	-	62009	70753	52430	9	9	9	1.46275	0.00726912	0.135456	0.000145795	-12.7438	down
Lhcp102421	UPLC-MS/MS	C42H68O13	Saikosapanin B1	柴胡皂苷B1	Terpenoids	萜类	Triterpene Saponin	三萜皂苷	-	1558200	1890500	1615400	9	9	9	1.46296	0.00367194	0.0949773	5.33165e-06	-17.517	down
mws2191	UPLC-MS/MS	C42H68O13	Saikosaponin G	柴胡皂苷 G	Terpenoids	萜类	Triterpene Saponin	三萜皂苷	99365-19-2	1239800	1559000	1654100	9	9	9	1.46287	0.00705041	0.135456	6.06346e-06	-17.3314	down
mws2190	UPLC-MS/MS	C42H68O13	Saikosaponin D	柴胡皂苷 D	Terpenoids	萜类	Triterpene	三萜	20874-52-6	567460	574750	749350	9	9	9	1.46276	0.00877417	0.144816	1.42739e-05	-16.0963	down
mws2188	UPLC-MS/MS	C42H68O13	Saikosaponin A	柴胡皂苷 A	Terpenoids	萜类	Triterpene	三萜	20736-09-8	3321900	3928300	3902700	9	9	9	1.46296	0.00282473	0.0833265	2.4209e-06	-18.656	down
Hmmp006067	UPLC-MS/MS	C42H68O13	Oleanolic acid-3-O-glucosyl(1→2)glucoside	齐墩果酸-3-O-葡萄糖基(1→2)葡萄糖苷	Terpenoids	萜类	Triterpene Saponin	三萜皂苷	-	2152	3197.7	9	9	9	9	1.03433	0.198768	0.42844	0.00503854	-7.63278	down
Hmcp001589	UPLC-MS/MS	C34H42O21	Isorhamnetin-3-O-rutinoside-4'-O-glucoside	异鼠李素-3-O-芸香糖苷-4'-O-葡萄糖苷	Flavonoids	黄酮	Flavonols	黄酮醇	111393-97-6	4075.8	18072	158320	973780	572410	298470	1.1922	0.0977134	0.316518	10.2215	3.35354	up
Lmsp003790	UPLC-MS/MS	C34H42O21	Isorhamnetin-3-O-sophoroside-7-O-rhamnoside	异鼠李素-3-O-槐糖苷-7-O-鼠李糖苷	Flavonoids	黄酮	Flavonols	黄酮醇	41328-75-0	8884	12278	12344	174050	130730	241070	1.44918	0.0334117	0.236002	16.2911	4.02601	up
mws1150	UPLC-MS/MS	C35H46O20	Echinacoside	松果菊苷	Phenolic acids	酚酸类	Phenolic acids	酚酸类	82854-37-3	9	9	9	12283	17839	29398	1.46172	0.0589589	0.272246	2204.44	11.1062	up
Cmdn004237	UPLC-MS/MS	C35H46O20	Betonyoside E	Betonyoside E	Phenolic acids	酚酸类	Phenolic acids	酚酸类	181301-30-4	9	9	9	42166	48200	72558	1.46306	0.0280447	0.218519	6034.22	12.559	up
Zmcp102709	UPLC-MS/MS	C42H68O14	Saikosaponin L	柴胡皂苷L	Terpenoids	萜类	Triterpene Saponin	三萜皂苷	-	862370	1518600	432610	9	9	9	1.46025	0.0971244	0.3152	9.59632e-06	-16.6691	down
mws2187	UPLC-MS/MS	C43H72O14	Saikosaponin B4	柴胡皂苷 B4	Terpenoids	萜类	Triterpene Saponin	三萜皂苷	58558-09-1	174070	248840	128890	9	9	9	1.46204	0.0343124	0.237115	4.89308e-05	-14.3189	down
mws2194	UPLC-MS/MS	C43H72O14	Saikosaponin B3	柴胡皂苷 B3	Terpenoids	萜类	Triterpene	三萜	58316-42-0	157110	312870	128490	9	9	9	1.4611	0.0735003	0.292147	4.5115e-05	-14.436	down
Zmcp102720	UPLC-MS/MS	C47H76O17	Bupleurumwenchuanense	2''-O-β-D-吡喃木糖基-柴胡皂苷b2	Terpenoids	萜类	Triterpene Saponin	三萜皂苷	-	160490	227460	158820	9	9	9	1.46269	0.0150407	0.169257	4.93809e-05	-14.3057	down
Zmcp102719	UPLC-MS/MS	C47H76O17	saikosaponin K	柴胡皂苷K	Terpenoids	萜类	Triterpene Saponin	三萜皂苷	-	281160	427580	222780	9	9	9	1.46216	0.0363994	0.241686	2.89849e-05	-15.0743	down
Zmcp102716	UPLC-MS/MS	C47H76O17	Rotundifolioside A	圆叶柴胡果苷A	Terpenoids	萜类	Triterpene Saponin	三萜皂苷	-	342370	302210	280820	9	9	9	1.46284	0.00340346	0.0911428	2.91766e-05	-15.0648	down
Zmcp102715	UPLC-MS/MS	C47H76O17	Rotundifolioside H	圆叶柴胡果苷H	Terpenoids	萜类	Triterpene Saponin	三萜皂苷	-	161070	423340	305650	9	9	9	1.4611	0.0595728	0.273121	3.0335e-05	-15.0087	down
Zmcp102804	UPLC-MS/MS	C48H78O17	saikosaponin C	柴胡皂苷C	Terpenoids	萜类	Triterpene Saponin	三萜皂苷	-	1925900	801990	808900	9	9	9	1.4609	0.0874078	0.30281	7.63404e-06	-16.9991	down
Lhcp102415	UPLC-MS/MS	C48H78O17	Saikosaponin BK1	柴胡皂苜BK1	Terpenoids	萜类	Triterpene Saponin	三萜皂苷	110352-77-7	1078000	743520	992800	9	9	9	1.46256	0.0112511	0.155985	9.59379e-06	-16.6695	down
Zmcp102701	UPLC-MS/MS	C48H80O17	Rotundifolioside C	圆叶柴胡果苷C	Terpenoids	萜类	Triterpene Saponin	三萜皂苷	-	797420	651720	538900	9	9	9	1.46261	0.0125123	0.162707	1.35812e-05	-16.168	down
Lhcp102414	UPLC-MS/MS	C48H80O17	Saikosaponin F	柴胡皂苷F	Terpenoids	萜类	Triterpene Saponin	三萜皂苷	62687-63-2	926690	549670	571450	9	9	9	1.46214	0.0305889	0.226541	1.31848e-05	-16.2108	down
Lmsp004090	UPLC-MS/MS	C43H48O23	Isorhamnetin-3-O-(6''-O-p-coumarol)sophoroside-7-O-rhamnoside	异鼠李素-3-O-(6''-O-对香豆酰)槐糖苷-7-O-鼠李糖苷	Flavonoids	黄酮	Flavonols	黄酮醇	-	838.5	3363.5	1729	28956	17116	47338	1.38236	0.0791216	0.297237	15.7495	3.97723	up
Cmhp005343	UPLC-MS/MS	C48H78O18	Cussonoside A	Cussonoside A	Terpenoids	萜类	Triterpene Saponin	三萜皂苷	57539-70-5	392550	619920	85619	9	9	9	1.45348	0.141804	0.369603	2.45882e-05	-15.3117	down
Lhcp102410	UPLC-MS/MS	C48H78O18	Saikosaponin N	柴胡皂苷N	Terpenoids	萜类	Triterpene Saponin	三萜皂苷	161068-50-4	474470	658480	1398700	9	9	9	1.46071	0.0961429	0.314369	1.0665e-05	-16.5168	down
Lhcp102411	UPLC-MS/MS	C48H78O18	Saikosaponin S	柴胡皂苷S	Terpenoids	萜类	Triterpene Saponin	三萜皂苷	-	198390	490760	449240	9	9	9	1.4611	0.0533344	0.264037	2.37177e-05	-15.3637	down
Lmmn005092	UPLC-MS/MS	C47H72O20	Medicagenic acid-3-O-glucuronide-28-O-rhamnosyl(1,2)-arabinoside	苜蓿酸-3-O-葡萄糖醛酸苷-28-O-鼠李糖基(1,2)-阿拉伯糖苷	Terpenoids	萜类	Triterpene Saponin	三萜皂苷	-	39107	750280	106880	9	9	9	1.44125	0.318122	0.533694	3.0125e-05	-15.0187	down
Lmmn005003	UPLC-MS/MS	C52H80O24	Medicagenic acid-3-O-glucuronide-28-O-xylosyl(1,4)-rhamnosyl(1,2)-arabinoside	苜蓿酸-3-O-葡萄糖醛酸苷-28-O-木糖基(1,4)-鼠李糖基(1,2)-阿拉伯糖苷	Terpenoids	萜类	Triterpene Saponin	三萜皂苷	128192-15-4	1147300	259330	237040	9	9	9	1.45588	0.209122	0.440885	1.64267e-05	-15.8936	down
XMW0757	GC-MS	C18H36O2	Hexadecanoic acid, 15-methyl-, methyl ester	十六酸十五甲酯	Ester	酯	-	-	6929-04-0	3239.09	1915.49	2128.9	12100.9	9032.9	14421.2	1.41853	0.0206438	0.198754	4.88158	2.28735	up
KMW0719	GC-MS	C20H42	Eicosane	二十烷	Hydrocarbons	烃类	-	-	112-95-8	16502	16514.6	5714.59	9	9	9	1.45595	0.0697352	0.283796	0.000697113	-10.4863	down
XMW0958	GC-MS	C11H23I	1-Iodoundecane	1-碘十一烷	Hydrocarbons	烃类	-	-	4282-44-4	98684	101945	67332.6	42852.6	21623.4	69389.7	1.06161	0.0678316	0.283268	0.49957	-1.00124	down
XMW0755	GC-MS	C20H32	m-Camphorene	间樟脑	Terpenoids	萜类	-	-	20016-73-3	27240.9	24376.2	9289.85	7579.81	9	9	1.13098	0.0679162	0.283268	0.124745	-3.00295	down
XMW0017	GC-MS	C17H34O2	Hexadecanoic acid, methyl ester	十六酸甲酯	Ester	酯	-	-	112-39-0	3214.56	2309.49	1733.48	12026.4	9001.11	14635	1.41122	0.0223218	0.203599	4.91387	2.29686	up
XMW0230	GC-MS	C19H40	Pentadecane, 2,6,10,14-tetramethyl-	2,6,10,14-四甲基-十五烷	Hydrocarbons	烃类	-	-	1921-70-6	19634.2	12299.8	12618	9	9	9	1.4615	0.0250358	0.209697	0.000606033	-10.6883	down
XMW0636	GC-MS	C10H21I	1-iodo-Decane	1-碘-癸烷	Others	其它类	-	-	2050-77-3	472575	351914	266830	958918	3.40802e+06	1.13867e+06	1.26276	0.202262	0.432741	5.04491	2.33483	up
KMW0713	GC-MS	C17H28O2	2,6,10-Dodecatrien-1-ol, 3,7,11-trimethyl-, acetate, (E,E)-	（E，E）-醋酸法呢酯	Ester	酯	-	-	4128-17-0	9	10666.4	9	311297	297445	342657	1.26166	0.000982011	0.0607795	89.0459	6.47648	up
XMW1486	GC-MS	C17H28O2	5-Azulenemethanol, 1,2,3,4,5,6,7,8-octahydro-.alpha.,.alpha.,3,8-tetramethyl-, acetate, [3S-(3.alpha.,5.alpha.,8.alpha.)]-	[3S-（3α，5α。，8α。）]-5-天青烯乙醇，1,2,3,4,5,6,7,8-八氢-α，α，3,8-四甲基-乙酸酯	Ester	酯	-	-	134-28-1	150331	52593.4	136785	15139.1	8912.5	13955.4	1.3772	0.0807392	0.299617	0.111881	-3.15996	down
NMW0298	GC-MS	C14H26O4	Hexanedioic acid, bis(2-methylpropyl) ester	己二酸双（2-甲基丙基）酯	Ester	酯	-	-	141-04-8	74578	25560.8	53475.5	5252.4	5312.34	12161.7	1.32785	0.0879566	0.30281	0.147945	-2.75687	down
WMW0203	GC-MS	C16H30O2	Palmitoleic Acid	棕榈油酸	Acid	酸	-	-	373-49-9	38144.5	33647.5	10741.4	14191.7	9	9	1.09326	0.0970887	0.3152	0.172169	-2.53811	down
D242	GC-MS	C16H30O2	9-Tetradecen-1-ol, acetate, (E)-	（E）-9-四氢萘-1-醇乙酸酯	Ester	酯	-	-	23192-82-7	4917	3489.84	24152.4	232315	126873	221630	1.36463	0.0281187	0.218519	17.8388	4.15695	up
D398	GC-MS	C16H30O2	5-Tetradecen-1-ol, acetate, (Z)-	Z-5-十四碳烯基乙酸酯	Ester	酯	-	-	35153-13-0	11274.7	8681.34	10070.8	186873	99539.9	171486	1.44623	0.0337308	0.236662	15.2497	3.9307	up
XMW1491	GC-MS	C16H28O2	Lavandulyl caproate	辛酸癸酸	Acid	酸	-	-	59550-36-6	295787	218362	252400	61364.7	22102.4	72042.3	1.33111	0.00274339	0.0833265	0.202869	-2.30138	down
XMW1258	GC-MS	C15H24O3	Acetic acid, (4,6,8,9-tetramethyl-3-oxabicyclo[3.3.1]non-6-en-1-yl)methyl ester	（4,6,8,9-四甲基-3-氧杂双环[3.3.1]非6-烯-1-基）乙酸甲酯	Terpenoids	萜类	-	-	309722-81-4	429369	163338	353109	32481.9	22763.4	25472.5	1.41497	0.0674902	0.283268	0.0853421	-3.5506	down
w14	GC-MS	C16H34O	Octane, 1,1'-oxybis-	1,1'-氧双-辛烷	Hydrocarbons	烃类	-	-	629-82-3	19910	8497	10004	9	9	9	1.45869	0.0701413	0.284007	0.000702924	-10.4743	down
XMW0265	GC-MS	C17H36	Tetradecane, 2,6,10-trimethyl-	2,6,10-三甲基十四烷	Hydrocarbons	烃类	-	-	14905-56-7	12541.6	55820.5	12830.5	1760.84	9	9	1.26035	0.206792	0.439179	0.0219089	-5.51234	down
NMW0297	GC-MS	C16H32O	Oxirane, tetradecyl-	十四烷基-环氧乙烷	Hydrocarbons	烃类	-	-	7320-37-8	113939	55901	92008.5	20327	14989.7	18179.1	1.40197	0.0534347	0.264037	0.204301	-2.29123	down
D130	GC-MS	C16H16O2	Benzeneacetic acid, 2-phenylethyl ester	苯乙酸2-苯乙基酯	Ester	酯	-	-	102-20-5	1312	4592	203	23234	18922.7	28405	1.25759	0.00667867	0.135034	11.5542	3.53035	up
NMW0362	GC-MS	C17H21N	BenzphetAmine	苯丙胺	Amine	胺	-	-	156-08-1	60541.3	78764.4	124204	6660938	6489089	7260410	1.45641	0.00113445	0.062084	77.4561	6.27531	up
XMW1264	GC-MS	C15H26O2	Acetic acid, 1-methyl-3-(2,6,6-trimethylcyclohex-1-enyl)propyl ester	4-（2,6,6-三甲基环己烯-1-基）丁烷-2-基乙酸酯	Ester	酯	-	-	86756-12-9	72398.5	87497.3	82018.6	10905.7	7716.29	18504.3	1.40718	0.000395825	0.0488722	0.153469	-2.70398	down
KMW0638	GC-MS	C15H26O2	Geranyl isovalerate	异戊酸香叶基酯	Ester	酯	-	-	109-20-6	48841	52740.4	54459.8	13146.5	12691	44070.2	1.10462	0.106204	0.329058	0.448007	-1.15841	down
NMW0280	GC-MS	C15H26O2	2-Furanmethanol, tetrahydro-.alpha.,.alpha.,5-trimethyl-5-(4-methyl-3-cyclohexen-1-yl)-, [2S-[2.alpha.,5.beta.(R*)]]-	[2S-[2α，5bR*）]]-四氢-α，α，5-三甲基-5-（4-甲基-3-环己烯-1-基）-2-呋喃甲醇	Terpenoids	萜类	-	-	26184-88-3	18603.7	25767.4	13879.1	11072	6997.5	3846.21	1.22266	0.0513107	0.261534	0.376234	-1.4103	down
XMW0111	GC-MS	C15H24O2	Spiro[4.5]decan-7-one, 1,8-dimethyl-8,9-epoxy-4-isopropyl-	1,8-二甲基-8,9-环氧-4-异丙基-螺癸烷	Terpenoids	萜类	-	-	61050-91-7	680075	440661	814827	41314.7	33192.5	19563.9	1.44122	0.0299764	0.225866	0.0486014	-4.36286	down
XMW0972	GC-MS	C16H26O	Khusimyl methyl ether	苦参基甲基醚	Ether	醚	-	-	300349-20-6	399162	189441	329110	33034.5	22530	25313.6	1.43212	0.0451983	0.247093	0.0881302	-3.50422	down
NMW0318	GC-MS	C15H22O2	Curcumenol	姜黄烯醇	Terpenoids	萜类	-	-	19431-84-6	650640	218133	419693	149094	32506.8	218138	1.03142	0.126853	0.356774	0.310244	-1.68853	down
NMW0277	GC-MS	C13H14O4	(S)-4-(1-Acetoxyallyl)phenyl acetate	（S）-4-（1-乙酰氧基烯丙基）苯乙酸酯	Ester	酯	-	-	52946-22-2	36686.3	32736.5	31616.8	6675.98	2743.62	6157.34	1.40101	0.000178204	0.0407197	0.154167	-2.69744	down
XMW1441	GC-MS	C12H15N3S	Thiazol-2-Amine, N-(4-dimethylaminobenzyl)-	N-（4-二甲基氨基苄基）-噻唑-2-胺	Amine	胺	-	-	13159-95-0	45363.4	38745.9	11300.9	9	9	9	1.45424	0.092831	0.308783	0.000282988	-11.787	down
NMW0287	GC-MS	C17H28	1,8,11,14-Heptadecatetraene, (Z,Z,Z)-	（Z，Z，Z）-1,8,11,14-庚二烯	Hydrocarbons	烃类	-	-	10482-53-8	389988	163842	305313	38585	29358.3	34580	1.41434	0.0618774	0.275212	0.119332	-3.06695	down
XMW0622	GC-MS	C12H22O4	Butanedioic acid, bis(2-methylpropyl) ester	丁二酸双（2-甲基丙基）酯	Ester	酯	-	-	925-06-4	6420.24	137150	5479.14	2234.88	1236.22	3053.04	1.0245	0.390839	0.577188	0.0437718	-4.51385	down
D347	GC-MS	C14H28O2	n-Capric acid isobutyl ester	正癸酸异丁酯	Ester	酯	-	-	30673-38-2	13535.5	30005.9	12568.7	2108.99	9	548.335	1.1639	0.0860282	0.30281	0.0475196	-4.39533	down
KMW0642	GC-MS	C16H34	Hexadecane	十六烷	Hydrocarbons	烃类	-	-	544-76-3	3815.63	2698.43	6050.02	9	9	1062.04	1.1733	0.0475023	0.251267	0.0859626	-3.54015	down
D397	GC-MS	C14H26O2	11-Dodecen-1-yl acetate	11-十二烷基-1-基乙酸酯	Ester	酯	-	-	35153-10-7	48184.2	34151.7	79305	3430.34	1581.45	3801.82	1.41569	0.0618901	0.275212	0.0545258	-4.19692	down
KMW0585	GC-MS	C14H26O2	Citronellyl isobutyrate	异丁酸香茅酯	Ester	酯	-	-	97-89-2	227952	255733	209492	36741.6	29813.5	25391.9	1.45578	0.00293184	0.0833265	0.132646	-2.91435	down
XMW0916	GC-MS	C11H15Br	(5-bromopentyl)-Benzene,	（5-溴戊基）-苯	Halogenated hydrocarbons	卤代烃	-	-	14469-83-1	522938	634728	493587	89936.8	69313.9	57116.6	1.45105	0.00596479	0.126127	0.131032	-2.93201	down
KMW0619	GC-MS	C14H24O2	Butanoic acid, 3,7-dimethyl-2,6-octadienyl ester, (E)-	丁酸香叶酯	Ester	酯	-	-	106-29-6	45207.5	436607	35877	19360	13541.5	16112.9	1.0697	0.358349	0.560486	0.094679	-3.40081	down
KMW0558	GC-MS	C14H24O2	1,5-Dimethyl-1-vinyl-4-hexenyl butyrate	丁酸芳基酯	Ester	酯	-	-	78-36-4	5.599e+06	2.81186e+07	4.72088e+06	2.79137e+06	1.23625e+06	4.07304e+06	1.02625	0.317061	0.533658	0.210743	-2.24644	down
KMW0591	GC-MS	C14H24O2	Butanoic acid, 1,7,7-trimethylbicyclo[2.2.1]hept-2-yl ester, endo-	丁酸冰片酯	Ester	酯	-	-	13109-70-1	53073.7	35344.5	36254.4	22894.7	16661.9	14638.3	1.34087	0.0393384	0.242405	0.434698	-1.20192	down
D246	GC-MS	C14H24O2	Propanoic acid, 2-methyl-, 3,7-dimethyl-2,6-octadienyl ester, (Z)-	[（2Z）-3,7-二甲基辛基-2,6-二烯基] 2-甲基丙酸酯	Ester	酯	-	-	2345-24-6	1.29491e+06	1.38724e+06	1.09764e+06	610129	434325	444724	1.41499	0.00295217	0.0833265	0.393984	-1.34379	down
KMW0647	GC-MS	C13H20O3	Methyl jasmonate	茉莉酸甲酯	Ester	酯	-	-	1211-29-6	43336.5	30564.6	36799.8	9	9	9	1.46237	0.00984276	0.146727	0.000243901	-12.0014	down
XMW0749	GC-MS	C16H30	8-Hexadecyne	8-十六烷	Hydrocarbons	烃类	-	-	19781-86-3	110275	57799.6	78842.9	10991.8	8517.13	9	1.02793	0.0331862	0.235704	0.0790463	-3.66116	down
D241	GC-MS	C15H26O	3-Cyclohexene-1-methanol, .alpha.,4-dimethyl-.alpha.-(4-methyl-3-pentenyl)-, [R-(R*,R*)]-	[R-（R *，R *）]-α，4-二甲基-α-（4-甲基-3-戊烯基）-3-环己烯-1-甲醇	Terpenoids	萜类	-	-	23178-88-3	56097.8	82762.1	72740.2	19522.8	17588.6	41883.9	1.26307	0.0159403	0.174816	0.373324	-1.4215	down
KMW0687	GC-MS	C15H26O	1H-Cycloprop[e]azulen-4-ol, decahydro-1,1,4,7-tetramethyl-, [1aR-(1a.alpha.,4.beta.,4a.beta.,7.alpha.,7a.beta.,7b.alpha.)]-	（+）-香豆素醇	Terpenoids	萜类	-	-	552-02-3	32197.1	28317.6	52604.9	2202.31	1204.77	1748.96	1.44309	0.0409514	0.242405	0.0455804	-4.45544	down
KMW0652	GC-MS	C15H26O	Cubenol	（-）-小茴香酚	Phenol	酚	-	-	21284-22-0	159720	157266	124622	25814.7	14066.6	37626.7	1.38444	0.00188684	0.0726642	0.175513	-2.51035	down
D319	GC-MS	C15H26O	.beta.-Acorenol	β-阿可诺尔	Terpenoids	萜类	-	-	28400-11-5	195070	157266	138012	34914.8	14017.8	49366.8	1.32697	0.00503694	0.116387	0.200468	-2.31855	down
KMW0671	GC-MS	C15H26O	(1R,4R)-1-methyl-4-(6-Methylhept-5-en-2-yl)cyclohex-2-enol	姜油烯醇	Alcohol	醇	-	-	58334-55-7	60656.9	89595.3	78507.4	21341.6	17856.4	46815.4	1.24261	0.018842	0.192077	0.375999	-1.4112	down
XMW0842	GC-MS	C15H26O	Palustrol (Ledum)	喇叭茶醇	Terpenoids	萜类	-	-	5986-49-2	34803.7	41702.6	38073.7	9871.95	2838.79	1729.51	1.34803	0.000663451	0.0495291	0.126028	-2.98819	down
WMW0075	GC-MS	C15H26O	1,6,10-Dodecatrien-3-ol, 3,7,11-trimethyl-	3,7,11-三甲基-1,6,10-十二碳三烯-3-醇	Terpenoids	萜类	-	-	7212-44-4	25387.2	323463	23685.8	10763.8	5780.56	8257.12	1.09846	0.36474	0.56437	0.0665747	-3.90888	down
XMW0027	GC-MS	C15H26O	Ledol	勒多尔	Terpenoids	萜类	-	-	577-27-5	743658	609362	770133	162184	54077.5	25636.7	1.34923	0.000744296	0.0515946	0.113934	-3.13373	down
KMW0661	GC-MS	C15H26O	.alpha.-Bisabolol	Α-没药醇	Alcohol	醇	-	-	515-69-5	259112	157361	197016	45429.3	34457.1	43873.7	1.42951	0.0299583	0.225866	0.201732	-2.30949	down
KMW0656	GC-MS	C15H26O	2-Naphthalenemethanol, decahydro-.alpha.,.alpha.,4a-trimethyl-8-methylene-, [2R-(2.alpha.,4a.alpha.,8a.beta.)]-	β-乙醛	Terpenoids	萜类	-	-	473-15-4	2097.97	1456.23	1396.2	629.064	381.196	648.85	1.35904	0.0272692	0.21575	0.335147	-1.57713	down
KMW0667	GC-MS	C15H26O	.tau.-Muurolol	丁三醇	Alcohol	醇	-	-	19912-62-0	215420	131760	186106	44032.2	19315.9	63808.7	1.3004	0.0160391	0.174816	0.23844	-2.0683	down
D244	GC-MS	C15H26O	(3S,3aR,3bR,4S,7R,7aR)-4-Isopropyl-3,7-dimethyloctahydro-1H-cyclopenta[1,3]cyclopropa[1,2]benzen-3-ol	（3S，3aR，3bR，4S，7R，7aR）-4-异丙基-3,7-二甲基八氢-1H-环戊[1,3]环丙烷[1,2]苯-3-3-醇	Terpenoids	萜类	-	-	23445-02-5	1.88311e+08	1.59363e+08	1.88169e+08	2.6449e+07	2.44999e+07	8.28767e+06	1.3994	0.000479416	0.0488722	0.110548	-3.17725	down
KMW0673	GC-MS	C15H26O	.alpha.-Cadinol	α-卡迪诺	Terpenoids	萜类	-	-	481-34-5	206758	127365	183994	39139.5	19082.6	50845.9	1.34988	0.01796	0.187498	0.210508	-2.24805	down
XMW0854	GC-MS	C15H26O	4a(2H)-Naphthalenol, 1,3,4,5,6,8a-hexahydro-4,7-dimethyl-1-(1-methylethyl)-, (1S,4S,4aS,8aR)-	（1S，4S，4aS，8aR）-1,3,4,5,6,8a-六氢-4,7-二甲基-1-（1-甲基乙基）-4a（2H）-萘	Terpenoids	萜类	-	-	73365-77-2	85705.8	117270	110342	20802.2	16195.1	45056	1.32402	0.00424005	0.103493	0.261885	-1.93299	down
WMW0149	GC-MS	C15H26O	Cedrol	雪松	Terpenoids	萜类	-	-	77-53-2	75967.9	79782.7	81536	13625.1	11683.4	65050.7	1.09538	0.105947	0.329058	0.380802	-1.39289	down
NMW0350	GC-MS	C13H18O3	(S,E)-4-Hydroxy-3,5,5-trimethyl-4-(3-oxobut-1-en-1-yl)cyclohex-2-enone	（S，E）-4-羟基-3,5,5-三甲基-4-（3-氧代丁-1-烯-1-基）环己-2-烯酮	Terpenoids	萜类	-	-	39763-33-2	7118.39	3463.9	5856.8	1580.08	557.466	1574.47	1.28969	0.0475565	0.251267	0.225804	-2.14686	down
XMW0627	GC-MS	C12H14O4	Diethyl Phthalate	邻苯二甲酸二乙酯	Ester	酯	-	-	84-66-2	68381.3	49365	110596	5959.08	3109.25	3522.57	1.43257	0.0575304	0.272246	0.0551404	-4.18075	down
XMW1017	GC-MS	C16H28	1,E-11,Z-13-Hexadecatriene	Z-13-十六碳三烯-E-11-1	Hydrocarbons	烃类	-	-	80634-97-5	89887.9	133824	119578	29527.9	20112.9	51551.2	1.31904	0.00922494	0.14653	0.294771	-1.76233	down
XMW1167	GC-MS	C15H24O	(1R,3E,7E,11R)-1,5,5,8-Tetramethyl-12-oxabicyclo[9.1.0]dodeca-3,7-diene	（1R，3E，7E，11R）-1,5,5,8-四甲基-12-氧杂双环[9.1.0]十二烷基-3,7-二烯	Terpenoids	萜类	-	-	19888-34-7	46004.9	48937.4	47553.5	8782.69	9897.3	38572.1	1.1112	0.0992285	0.318462	0.401781	-1.31552	down
D337	GC-MS	C15H24O	2H-2a,7-Methanoazuleno[5,6-b]oxirene, octahydro-3,6,6,7a-tetramethyl-	α-雪松烯环氧化物	Terpenoids	萜类	-	-	29597-36-2	14714.1	12668	9563.65	9	9	2707.42	1.17099	0.00552886	0.12284	0.073768	-3.76086	down
XMW0054	GC-MS	C15H24O	Farnesene epoxide, E-	E-法呢烯环氧化物	Terpenoids	萜类	-	-	83637-40-5	42433.7	49715.8	54033.1	12127.6	14702.7	29459.8	1.27203	0.0140469	0.164254	0.385067	-1.37682	down
w05	GC-MS	C15H24O	2,6,10-Dodecatrienal, 3,7,11-trimethyl-	3,7,11-三甲基-2,6,10-十二烷基	Terpenoids	萜类	-	-	19317-11-4	10500	5226.13	10552.2	9	9	9	1.45915	0.0384296	0.242405	0.00102746	-9.9267	down
NMW0319	GC-MS	C15H24O	2,6,10-Dodecatrienal, 3,7,11-trimethyl-, (E,E)-	（E，E）-3,7,11-三甲基-2,6,10-十二烷基	Hydrocarbons	烃类	-	-	502-67-0	198164	76123	99502.1	25064.5	12605	84359.9	1.05491	0.141953	0.369603	0.326466	-1.61499	down
KMW0636	GC-MS	C15H24O	1H-3a,7-Methanoazulen-5-ol, octahydro-3,8,8-trimethyl-6-methylene-	雪松醇	Alcohol	醇	-	-	28231-03-0	65128.6	71880.4	75147.3	14324.2	11832.8	63067.6	1.06287	0.129297	0.357941	0.420561	-1.24961	down
XMW1177	GC-MS	C15H24O	11,11-Dimethyl-4,8-dimethylenebicyclo[7.2.0]undecan-3-ol	11,11-二甲基-4,8-​​二亚甲基双环[7.2.0]十一碳三醇	Alcohol	醇	-	-	79580-01-1	82401.7	59791.3	69780.3	15230.9	7343.45	19284.2	1.37084	0.00433644	0.104376	0.197471	-2.34029	down
D318	GC-MS	C15H24O	.beta.-Oplopenone	β-奥普拉酮	Terpenoids	萜类	-	-	28305-60-4	116067	71435.3	148912	14158.3	10984.6	43957.4	1.26823	0.040431	0.242405	0.205402	-2.28347	down
D419	GC-MS	C15H24O	2-Penten-1-ol, 2-methyl-5-(2-methyl-3-methylenebicyclo[2.2.1]hept-2-yl)-, [1S-[1.alpha.,2.alpha.(E),4.alpha.]]-	反β-檀香醇	Terpenoids	萜类	-	-	37172-32-0	141143	43909.6	57422.4	22800.6	9167.47	35847.2	1.11498	0.190043	0.417952	0.279679	-1.83816	down
WMW0022	GC-MS	C15H24O	Salvial-4(14)-en-1-one	丹参酮	Terpenoids	萜类	-	-	73809-82-2	174775	115935	281346	12373.6	5625.09	10431.6	1.42345	0.0642919	0.279243	0.0496985	-4.33065	down
D254	GC-MS	C15H24O	2H-2,4a-Methanonaphthalen-8(5H)-one, 1,3,4,6,7,8a-hexahydro-1,1,5,5-tetramethyl-	1，1,3,4,6,7,8a-六氢-1,1,5,5-四甲基-2H-2,4a-甲烷萘-8（5H）酮	Terpenoids	萜类	-	-	23787-90-8	35634.1	30869.7	40803.6	6480.43	6830.28	6351.12	1.4559	0.00936822	0.14653	0.183229	-2.44828	down
XMW0203	GC-MS	C14H20O2	2,5-di-tert-Butyl-1,4-benzoquinone	1,5-二叔丁基-1,4-苯醌	Aromatics	芳烃	-	-	2460-77-7	17561.6	21186.1	27848.3	1135.2	480.314	919.045	1.4409	0.0189841	0.192357	0.0380588	-4.71563	down
XMW0479	GC-MS	C13H16O3	cis-3-Hexenyl salicylate	顺-3-己烯基水杨酸酯	Ester	酯	-	-	65405-77-8	221857	246381	171779	34532.9	23632.9	45598.1	1.41995	0.010091	0.148201	0.162127	-2.62481	down
NMW0247	GC-MS	C15H22O	Furan, 3-(4,8-dimethyl-3,7-nonadienyl)-, (E)-	（E）-3-（4,8-二甲基-3,7-壬二烯基）-呋喃	Terpenoids	萜类	-	-	23262-34-2	11322.8	16265	5350.21	5057.27	4962.23	4514.63	1.08419	0.191009	0.417952	0.441256	-1.18031	down
NMW0308	GC-MS	C15H22O	2,6,9,11-Dodecatetraenal, 2,6,10-trimethyl-	2,6,10-三甲基-2,6,9,11-十二碳烯醛	Terpenoids	萜类	-	-	4955-32-2	594019	146237	261186	55292.5	12935.6	64488.4	1.22989	0.162033	0.389464	0.132525	-2.91566	down
XMW0754	GC-MS	C15H22O	Methanol, (cyclohexyl)(2,3-dimethylphenyl)-	（环己基）（2,3-二甲基苯基）-甲醇	Alcohol	醇	-	-	349498-47-1	9	33566	9	764223	710444	840534	1.2312	0.00121351	0.0637276	68.9375	6.10722	up
XMW1000	GC-MS	C15H22O	(E)-5-((1R,3R,6S)-2,3-Dimethyltricyclo[2.2.1.02,6]heptan-3-yl)-2-methylpent-2-enal	（E）-5-（（（1R，3R，6S）-2,3-二甲基三环[2.2.1.02,6]庚基-3-基）-2-甲基-戊-2-烯	Terpenoids	萜类	-	-	19903-70-9	337687	147340	330711	53533.1	36651.7	45621.3	1.38448	0.0671261	0.283268	0.166482	-2.58656	down
D438	GC-MS	C15H22O	Sesquirosefuran	倍半乳糖呋喃	Heterocyclic compound	杂环化合物	-	-	39007-93-7	46913.5	55478.8	13314.3	2252.23	2773.03	1849.58	1.38357	0.106084	0.329058	0.0594161	-4.073	down
D325	GC-MS	C15H22O	(3R,3aR,7S,8aS)-3,6,8,8-Tetramethyl-4,7,8,8a-tetrahydro-1H-3a,7-methanoazulen-2(3H)-one	（3R，3aR，7S，8aS）-3,6,8,8-四甲基-4,7,8,8a-四氢-1H-3a，7-甲基氮杂烯-2(3H)-酮	Terpenoids	萜类	-	-	288249-25-2	41570.7	78499.7	41966.4	163995	277192	280792	1.378	0.0302647	0.226072	4.45565	2.15564	up
XMW1022	GC-MS	C15H22O	3,7-Cyclodecadien-1-one, 3,7-dimethyl-10-(1-methylethylidene)-, (E,E)-	（E，E）-3,7-二甲基-10-（1-甲基亚乙基）-3,7-环十二烷基-1-酮	Terpenoids	萜类	-	-	6902-91-6	169199	101314	126288	16472.7	10866.8	25611.9	1.40242	0.0243405	0.208598	0.133446	-2.90568	down
XMW0617	GC-MS	C12H24O3	Propanoic acid, 2-methyl-, 3-hydroxy-2,2,4-trimethylpentyl ester	2,2,4-三甲基戊烷-1,3-二醇单异丁酸酯	Ester	酯	-	-	77-68-9	7739.29	131036	34185.7	4422.88	4069.71	3336.85	1.16216	0.2882	0.51537	0.0683937	-3.86999	down
KMW0726	GC-MS	C14H30O	1-Tetradecanol	十四醇	Alcohol	醇	-	-	112-72-1	137631	60316.6	108716	16976.5	11973.9	13279.8	1.41053	0.0590677	0.272246	0.137709	-2.86031	down
D204	GC-MS	C13H26O2	Pentyl octanoate	辛酸戊酯	Ester	酯	-	-	638-25-5	81075.9	96200.7	66892.4	38800.8	27439.9	29451.7	1.39866	0.016743	0.17801	0.391911	-1.3514	down
XMW1345	GC-MS	C13H26O2	Octanoic acid, 3-methylbutyl ester	3-甲基丁酯辛酸	Ester	酯	-	-	2035-99-6	100166	175867	88169.6	31639.4	31735.4	59265.3	1.27542	0.0869444	0.30281	0.336735	-1.57031	down
XMW0419	GC-MS	C15H32	Tetradecane, 2-methyl-	二甲基十六烷	Hydrocarbons	烃类	-	-	1560-95-8	26984.5	29872.5	25649.1	2634.11	1479.51	787.471	1.42969	0.000562223	0.0495291	0.0594028	-4.07333	down
XMW0200	GC-MS	C15H32	Tetradecane, 4-methyl-	四甲基十四烷	Hydrocarbons	烃类	-	-	25117-24-2	26435.7	29999.6	24368.4	2406.26	1547.76	2263.57	1.45288	0.00360532	0.0946671	0.0769468	-3.7	down
D399	GC-MS	C14H28O	cis-9-Tetradecen-1-ol	豆蔻醇	Alcohol	醇	-	-	35153-15-2	132904	58806.6	106528	17208.3	15369.2	15724.6	1.40828	0.0614596	0.275212	0.161958	-2.62631	down
KMW0640	GC-MS	C14H28O	Tetradecanal	十四烷基醛	Aldehyde	醛	-	-	124-25-4	8810.99	8532.12	6763.59	9	9	7590.16	1.0195	0.154735	0.382612	0.315603	-1.66381	down
D382	GC-MS	C14H28O	Myristoleyl Alcohol	麦里斯托利醇	Alcohol	醇	-	-	34010-15-6	137631	60626	109459	17390.6	11973.9	14372.4	1.40809	0.0589096	0.272246	0.142134	-2.81467	down
D354	GC-MS	C13H22O2	3-Cyclohexene-1-carboxAldehyde, 4-(4-hydroxy-4-methylpentyl)-	4-（4-羟基-4-甲基戊基）-3-环己烯-1-甲醛	Aldehyde	醛	-	-	31906-04-4	161063	106015	118679	49074.2	43264.5	48313	1.41283	0.0376973	0.242405	0.364611	-1.45557	down
XMW0133	GC-MS	C13H20O2	6-Methyl-6-(5-methylfuran-2-yl)heptan-2-one	6-甲基-6-（5-甲基呋喃-2-基）庚烷-2-酮	Ketone	酮	-	-	50464-95-4	328457	300228	203851	554931	2.01692e+06	658371	1.18686	0.231269	0.452979	3.87998	1.95605	up
KMW0639	GC-MS	C13H20O2	3-Buten-2-one, 4-(2,2,6-trimethyl-7-oxabicyclo[4.1.0]hept-1-yl)-	环氧-β-紫罗兰酮	Terpenoids	萜类	-	-	23267-57-4	94463.9	120307	62452.9	45253.1	27693.6	55942.8	1.1742	0.0792737	0.297237	0.464929	-1.10492	down
NMW0258	GC-MS	C12H17NO2	Fenobucarb	异丁威	Ester	酯	-	-	3766-81-2	92361.3	91308.2	100353	18547.1	16122.7	84127.3	1.06624	0.129746	0.357941	0.418267	-1.25751	down
XMW1336	GC-MS	C11H13NO3	N-Benzyloxy-2-carbomethoxyaziridine	1-苯基甲氧基氮丙啶-2-羧酸甲酯	Ester	酯	-	-	53084-33-6	1.55143e+06	6.37608e+06	1.29999e+06	306877	314407	342625	1.30633	0.23731	0.460021	0.10446	-3.25897	down
XMW0195	GC-MS	C15H26	1H-Cycloprop[e]azulene, decahydro-1,1,4,7-tetramethyl-, [1aR-(1a.alpha.,4.beta.,4a.beta.,7.beta.,7a.beta.,7b.alpha.)]-	十氢-1,1,4,7-四甲基-1H-环丙烯腈	Terpenoids	萜类	-	-	28580-43-0	30360.5	1.66332e+06	29036.6	4068.53	3950.9	7613.87	1.10563	0.405726	0.577188	0.00907479	-6.78392	down
XMW1364	GC-MS	C15H26	7-Octylidenebicyclo[4.1.0]heptane	7-辛二烯双环[4.1.0]庚烷	Terpenoids	萜类	-	-	82253-11-0	1.05496e+06	1.50767e+06	869523	405034	246333	614082	1.24948	0.0418954	0.243814	0.368704	-1.43946	down
XMW0473	GC-MS	C13H18O2	Benzoic acid, hexyl ester	苯甲酸己酯	Ester	酯	-	-	6789-88-4	71696	124519	52432.1	9	9	9	1.46095	0.0614428	0.275212	0.000108587	-13.1689	down
NMW0265	GC-MS	C13H18O2	Ibuprofen	布洛芬	Acid	酸	-	-	15687-27-1	115057	178613	117931	28769.5	22302.6	68365.1	1.27118	0.0224764	0.203935	0.290177	-1.785	down
D156	GC-MS	C13H18O2	Propanoic acid, 2-methyl-, 3-phenylpropyl ester	2-甲基-丙酸3-苯基丙基酯	Ester	酯	-	-	103-58-2	194650	4.50353e+06	171150	68859.7	35856.4	97806.5	1.01764	0.393028	0.577188	0.0415915	-4.58757	down
XMW0040	GC-MS	C12H14O3	Phenol, 2-methoxy-4-(1-propenyl)-, acetate	乙酸异丁香酚酯	Ester	酯	-	-	93-29-8	29538.1	26764	35442.2	4629.74	4717.96	6351.12	1.44347	0.00773723	0.136864	0.171115	-2.54696	down
XMW1153	GC-MS	C15H24	1R,4R,7R,11R-1,3,4,7-Tetramethyltricyclo[5.3.1.0(4,11)]undec-2-ene	1R，4R，7R，11R-1,3,4,7-四甲基三环[5.3.1.0（4,11）]十一烷基-2-烯	Terpenoids	萜类	-	-	137235-59-7	656865	1.0218e+06	551071	345878	147138	502360	1.07158	0.0858454	0.30281	0.44641	-1.16356	down
XMW0197	GC-MS	C15H24	(1S,4S,4aS)-1-Isopropyl-4,7-dimethyl-1,2,3,4,4a,5-hexahydronaphthalene	（1S，4S，4aS）-1-异丙基-4,7-二甲基-1,2,3,4,4a，5-六氢萘	Terpenoids	萜类	-	-	267665-20-3	4.02514e+06	4.24825e+06	3.76995e+06	430576	256590	123135	1.42384	7.47606e-05	0.0407197	0.0672821	-3.89363	down
KMW0559	GC-MS	C15H24	Bicyclo[7.2.0]undec-4-ene, 4,11,11-trimethyl-8-methylene-,[1R-(1R*,4Z,9S*)]-	异烟碱	Terpenoids	萜类	-	-	118-65-0	195219	1.84376e+06	202909	25616.9	20689.7	37408.4	1.27837	0.319826	0.535516	0.0373413	-4.74308	down
KMW0582	GC-MS	C15H24	.beta.-Guaiene	β-番石榴烯	Terpenoids	萜类	-	-	88-84-6	2.95888e+06	3.70978e+06	3.69893e+06	482915	302726	245645	1.44411	0.00378504	0.0950649	0.0994721	-3.32956	down
XMW0264	GC-MS	C15H24	Bicyclo[4.4.0]dec-1-ene, 2-isopropyl-5-methyl-9-methylene-	2-异丙基-5-甲基-9-亚甲基-双环[4.4.0]癸-1-烯	Terpenoids	萜类	-	-	150320-52-8	1.88311e+08	1.59378e+08	1.88169e+08	2.64309e+07	2.4489e+07	8.28833e+06	1.3995	0.00047895	0.0488722	0.110492	-3.17798	down
XMW0468	GC-MS	C15H24	Bicyclo[3.1.1]hept-2-ene, 2,6-dimethyl-6-(4-methyl-3-pentenyl)-	2,6-二甲基-6-（4-甲基-3-戊烯基）-双环[3.1.1]庚-2-烯	Terpenoids	萜类	-	-	17699-05-7	1.23374e+08	1.13869e+08	9.02083e+07	3.13214e+07	3.68922e+07	4.07009e+07	1.42473	0.0129238	0.162707	0.332613	-1.58808	down
w38	GC-MS	C15H24	1H-3a,7-Methanoazulene, octahydro-3,8,8-trimethyl-6-methylene-, [3R-(3.alpha.,3a.beta.,7.beta.,8a.alpha.)]-	Β-雪松烯	Terpenoids	萜类	-	-	546-28-1	8.44272e+06	2.43673e+08	7.97513e+06	1.94349e+06	1.1981e+06	2.57231e+06	1.10346	0.392953	0.577188	0.0219689	-5.5084	down
D300	GC-MS	C15H24	Aristolochene	马兜铃属	Terpenoids	萜类	-	-	26620-71-3	370866	437872	308379	73885.3	62334.2	67215.9	1.45124	0.0141751	0.164254	0.182107	-2.45714	down
XMW0382	GC-MS	C15H24	isoledene	（-)-异喇叭烯	Terpenoids	萜类	-	-	95910-36-4	770121	4.4069e+07	643540	81874.4	115182	138631	1.11282	0.407131	0.577188	0.00738056	-7.08205	down
GMW0078	GC-MS	C15H24	.beta.-Bisabolene	β-红没药烯	Terpenoids	萜类	-	-	495-61-4	7.76779e+06	6.88087e+06	8.27841e+06	1.26408e+06	1.1203e+06	497575	1.41734	0.000540653	0.0495291	0.125701	-2.99193	down
XMW0743	GC-MS	C15H24	(-)-Aristolene	（-）-马兜铃烯	Terpenoids	萜类	-	-	6831-16-9	1.92337e+07	2.28167e+07	1.39603e+07	6.60133e+06	3.90648e+06	1.19893e+07	1.18071	0.0335005	0.236002	0.401656	-1.31597	down
XMW0549	GC-MS	C15H24	(1S,4aR,7R)-1,4a-Dimethyl-7-(prop-1-en-2-yl)-1,2,3,4,4a,5,6,7-octahydronaphthalene	（1S，4aR，7R）-1,4a-二甲基-7-（丙烯基）-1,2,3,4,4a，5,6,7-八氢萘	Terpenoids	萜类	-	-	52026-55-8	593536	914767	489475	194442	138373	327073	1.27547	0.0563075	0.270307	0.330311	-1.5981	down
XMW0182	GC-MS	C15H24	(3S,3aS,6R,8aS)-3,8,8-Trimethyl-7-methyleneoctahydro-1H-3a,6-methanoazulene	吡嗪烯	Terpenoids	萜类	-	-	31145-21-8	7.46075e+06	1.10011e+07	6.0221e+06	2.58823e+06	1.89856e+06	4.45159e+06	1.25291	0.0529122	0.264037	0.365072	-1.45375	down
XMW0469	GC-MS	C15H24	(1R,3aS,8aS)-7-Isopropyl-1,4-dimethyl-1,2,3,3a,6,8a-hexahydroazulene	愈创木6,9-二烯	Terpenoids	萜类	-	-	36577-33-0	1.92363e+07	2.28127e+07	1.40229e+07	6.60287e+06	3.9078e+06	1.19981e+07	1.18166	0.0329117	0.235686	0.401426	-1.31679	down
WMW0012	GC-MS	C15H24	(+)-epi-Bicyclosesquiphellandrene	（+）-表-双环倍半萜类烯	Terpenoids	萜类	-	-	54274-73-6	529666	485659	519132	57312.2	45451.3	36891.3	1.45743	0.000122648	0.0407197	0.0910125	-3.45779	down
XMW0234	GC-MS	C15H24	cis-.alpha.-Bergamotene	顺式-α-香柠檬烯	Terpenoids	萜类	-	-	18252-46-5	3.24971e+06	5.63342e+07	2.84503e+06	1.26068e+06	612632	1.8205e+06	1.01436	0.385267	0.575809	0.0591683	-4.07903	down
D353	GC-MS	C15H24	(S,1Z,6Z)-8-Isopropyl-1-methyl-5-methylenecyclodeca-1,6-diene	（1Z，6Z，8S）-1-甲基-5-亚甲基-8-丙-2-基环癸-1,6-二烯	Terpenoids	萜类	-	-	317819-80-0	1.04457e+07	1.31997e+07	8.67901e+06	3.2191e+06	2.01427e+06	5.42025e+06	1.28502	0.0139064	0.164254	0.329584	-1.60128	down
WMW0052	GC-MS	C15H24	(E)-1-Methyl-4-(6-methylhept-5-en-2-ylidene)cyclohex-1-ene	（E）-1-甲基-4-（6-甲基庚-5-烯-2-亚烷基）环己-1-烯	Terpenoids	萜类	-	-	53585-13-0	8.9284e+06	1.10867e+07	6.65287e+06	3.11588e+06	2.11475e+06	4.96279e+06	1.25981	0.0294803	0.224076	0.382235	-1.38747	down
D338	GC-MS	C15H24	1-methyl-4-(1,2,2-trimethylcyclopentyl)cyclohexa-1,3-diene	1-甲基-4-(1,2,2-三甲基环戊基)环己-1,3-二烯	Terpenoids	萜类	-	-	29621-78-1	6.0849e+07	4.88526e+07	5.81027e+07	8.09899e+06	7.49337e+06	2.94417e+06	1.41284	0.00160401	0.0677987	0.110465	-3.17834	down
KMW0548	GC-MS	C15H24	[1aR-(1a.alpha.,4.alpha.,4a.beta.,7b.alpha.)]-1a,2,3,4,4a,5,6,7b-octahydro-1,1,4,7-tetramethyl-1H-Cycloprop[e]azulene	(-)-alpha-古芸烯	Terpenoids	萜类	-	-	489-40-7	1.02813e+06	1.19101e+07	1.14572e+06	133589	94103.1	115616	1.29747	0.331992	0.543383	0.024376	-5.3584	down
XMW0147	GC-MS	C15H24	1-Methyl-4-(6-methylhept-5-en-2-yl)cyclohexa-1,3-diene	1-甲基-4-（6-甲基庚-5-烯-2-基）环己-1,3-二烯	Terpenoids	萜类	-	-	451-55-8	285587	344585	248690	67165.8	58360.5	66527.8	1.44933	0.0138426	0.164254	0.218526	-2.19412	down
KMW0509	GC-MS	C15H24	Cyclohexene, 4-ethenyl-4-methyl-3-(1-methylethenyl)-1-(1-methylethyl)-, (3R-trans)-	δ-榄香烯	Terpenoids	萜类	-	-	20307-84-0	163820	170320	270193	82363	24177.7	97466.6	1.15461	0.0391307	0.242405	0.337574	-1.56672	down
WMW0008	GC-MS	C15H24	Longifolene	长叶烯	Terpenoids	萜类	-	-	475-20-7	5.13496e+06	5.98649e+07	5.60444e+06	664946	469943	435328	1.3038	0.332793	0.543383	0.0222397	-5.49072	down
XMW0388	GC-MS	C15H24	(4aR,8aR)-5,8a-dimethyl-3-propan-2-ylidene-1,2,4,4a,7,8-hexahydronaphthalene	（4aR，8aR）-5,8a-二甲基-3-丙烷-2-亚烷基-1,2,4,4a，7,8-六氢萘	Terpenoids	萜类	-	-	6813-21-4	4.85608e+06	7.46208e+06	4.37181e+06	936314	382373	349365	1.40865	0.0307846	0.22702	0.0999434	-3.32275	down
XMW1408	GC-MS	C15H24	1H-Cyclopropa[a]naphthalene, 1a,2,3,3a,4,5,6,7b-octahydro-1,1,3a,7-tetramethyl-, [1aR-(1a.alpha.,3a.alpha.,7b.alpha.)]-	[1aR-（1aα。，3a。 ，7b.α。）]-1a，2,3,3a，4,5,6,7b-八氢-1,1,3a，7-四甲基-1H-环丙烷[a]萘	Terpenoids	萜类	-	-	489-29-2	430126	3.31501e+06	505248	76347.2	39840.2	112295	1.27233	0.293383	0.518809	0.0537558	-4.21744	down
D341	GC-MS	C15H24	Naphthalene, decahydro-1,6-bis(methylene)-4-(1-methylethyl)-, (4.alpha.,4a.alpha.,8a.alpha.)-	十氢-1,6-双（亚甲基）-4-（1-甲基乙基）-，（4α，4aα，8aα）-萘	Terpenoids	萜类	-	-	30021-46-6	353286	359084	305161	41051.4	22949	22064.7	1.44701	0.00114639	0.062084	0.0845824	-3.5635	down
XMW0825	GC-MS	C15H24	Bicyclo[3.1.1]heptane, 6-methyl-2-methylene-6-(4-methyl-3-pentenyl)-, [1R-(1.alpha.,5.alpha.,6.beta.)]-	[1R-（1α，5α，6β）]-6-甲基-2-亚甲基-6-（4-甲基-3-戊烯基）-双环[3.1.1]庚烷	Terpenoids	萜类	-	-	55123-21-2	6.07398e+06	7.75235e+06	4.79633e+06	2.02943e+06	1.31816e+06	3.63005e+06	1.23399	0.0259036	0.21175	0.374685	-1.41625	down
KMW0622	GC-MS	C15H24	Cyclohexene, 3-(1,5-dimethyl-4-hexenyl)-6-methylene-, [S-(R*,S*)]-	β-倍半萜类烯	Terpenoids	萜类	-	-	20307-83-9	696419	933930	545587	257033	150699	372928	1.26265	0.0341688	0.237115	0.35877	-1.47887	down
KMW0614	GC-MS	C15H24	Cubenene	卡丁二烯	Terpenoids	萜类	-	-	29837-12-5	4.10571e+06	4.7282e+06	3.13269e+06	1.55655e+06	1.06738e+06	2.49267e+06	1.23875	0.0220967	0.202611	0.427574	-1.22575	down
NMW0206	GC-MS	C15H24	(1R,9R,E)-4,11,11-Trimethyl-8-methylenebicyclo[7.2.0]undec-4-ene	（1R，9R，E）-4,11,11-三甲基-8-亚甲基双环[7.2.0]十一烷基-4-烯	Terpenoids	萜类	-	-	68832-35-9	9.90491e+06	1.57828e+07	8.01403e+06	3.53572e+06	1.98049e+06	6.5267e+06	1.17687	0.0705105	0.284174	0.357338	-1.48464	down
XMW0629	GC-MS	C15H24	3H-3a,7-Methanoazulene, 2,4,5,6,7,8-hexahydro-1,4,9,9-tetramethyl-, [3aR-(3a.alpha.,4.beta.,7.alpha.)]-	莎草烯	Terpenoids	萜类	-	-	2387-78-2	902995	1.16361e+07	1.01602e+06	123482	85034.9	9	1.03383	0.337723	0.546985	0.0153835	-6.02247	down
KMW0603	GC-MS	C15H24	Germacrene D	大根香叶烯D	Terpenoids	萜类	-	-	23986-74-5	1.20053e+06	3.43874e+06	630922	322190	219490	213262	1.26193	0.220943	0.447002	0.143248	-2.80342	down
D293	GC-MS	C15H24	Cyclohexene, 4-[(1E)-1,5-dimethyl-1,4-hexadien-1-yl]-1-methyl-	4-[（（1E）-1,5-二甲基-1,4-己二-1-基] -1-甲基-环己烯	Terpenoids	萜类	-	-	25532-79-0	3.12258e+07	2.62972e+07	3.18842e+07	4.47892e+06	4.13162e+06	1.79912e+06	1.42026	0.00111108	0.062084	0.11643	-3.10247	down
WMW0053	GC-MS	C15H24	Benzene, 1-(1,5-dimethylhexyl)-4-methyl-	1-（1,5-二甲基己基）-4-甲基-苯	Terpenoids	萜类	-	-	1461-02-5	5.90169e+06	7.47539e+06	4.50007e+06	1.94714e+06	1.27399e+06	3.50819e+06	1.22782	0.0294173	0.224076	0.37642	-1.40959	down
XMW0948	GC-MS	C15H24	Valerena-4,7(11)-diene	（4S，7R，7aR）-2,4,5,6,7,7a-六氢-3,7-二甲基-4-（2-甲基-1-丙烯-1-基）-1H-茚	Terpenoids	萜类	-	-	351222-66-7	1.16398e+06	1.15744e+06	1.0366e+06	123884	66785.8	67987	1.44814	0.00029699	0.0428902	0.0770264	-3.6985	down
WMW0004	GC-MS	C15H24	Ylangene	衣兰烯	Terpenoids	萜类	-	-	14912-44-8	791584	4.4147e+07	660853	85058.1	117789	133045	1.11845	0.406659	0.577188	0.00736615	-7.08487	down
KMW0556	GC-MS	C15H24	Naphthalene, decahydro-4a-methyl-1-methylene-7-(1-methylethenyl)-, [4aR-(4a.alpha.,7.alpha.,8a.beta.)]-	β-芹子烯	Terpenoids	萜类	-	-	17066-67-0	96630.5	130629	97011.1	16633.9	13096.8	15898.4	1.45181	0.0137743	0.164254	0.140713	-2.82917	down
XMW0009	GC-MS	C15H24	Naphthalene, 1,2,4a,5,8,8a-hexahydro-4,7-dimethyl-1-(1-methylethyl)-, [1S-(1.alpha.,4a.beta.,8a.alpha.)]-	Β-卡丁烯	Terpenoids	萜类	-	-	523-47-7	1.87991e+08	1.57283e+08	1.87602e+08	2.63463e+07	2.44257e+07	8.22938e+06	1.39873	0.000669074	0.0495291	0.110723	-3.17498	down
XMW0143	GC-MS	C15H24	1H-3a,7-Methanoazulene, 2,3,4,7,8,8a-hexahydro-3,6,8,8-tetramethyl-, [3R-(3.alpha.,3a.beta.,7.beta.,8a.alpha.)]-	（-)-α-柏木烯	Terpenoids	萜类	-	-	469-61-4	3.25089e+06	5.63188e+07	2.84144e+06	1.26068e+06	615323	1.82218e+06	1.01392	0.38531	0.575809	0.0592552	-4.07691	down
XMW0131	GC-MS	C15H24	Di-epi-.alpha.-cedrene	双表-α-雪松烯	Terpenoids	萜类	-	-	50894-66-1	4.12115e+06	4.90058e+07	4.39521e+06	516998	390730	340620	1.30139	0.335492	0.545411	0.021702	-5.52603	down
KMW0478	GC-MS	C15H24	cis-.beta.-Farnesene	（Z）-β-法呢烯	Terpenoids	萜类	-	-	28973-97-9	918217	1.42418e+06	878468	346321	263538	598396	1.26571	0.0414451	0.243094	0.375133	-1.41452	down
WMW0223	GC-MS	C15H24	Cedrene	雪松烯	Terpenoids	萜类	-	-	11028-42-5	661188	5.57551e+06	637017	329716	155769	480309	1.01286	0.353183	0.55654	0.140505	-2.8313	down
KMW0596	GC-MS	C15H24	Alloaromadendrene	阿古玛烯	Terpenoids	萜类	-	-	25246-27-9	6.53984e+07	1.07604e+08	5.5889e+07	2.36862e+07	1.27734e+07	4.34137e+07	1.18135	0.0684877	0.283268	0.348957	-1.51888	down
XMW0033	GC-MS	C15H24	(1R,3aS,4aS,8aS)-1,4,4,6-Tetramethyl-1,2,3,3a,4,4a,7,8-octahydrocyclopenta[1,4]cyclobuta[1,2]benzene	（1R，3aS，4aS，8aS）-1,4,4,6-四甲基-1,2,3,3a，4,4a，7,8-八氢环戊[1,4]环丁[1,2]苯	Terpenoids	萜类	-	-	94535-52-1	4.23121e+06	4.92309e+07	4.61842e+06	539018	417847	351144	1.30334	0.332711	0.543383	0.0225206	-5.47261	down
KMW0537	GC-MS	C15H24	Cyclohexane, 1-ethenyl-1-methyl-2,4-bis(1-methylethenyl)-, (1.alpha.,2.beta.,4.beta.)-	β-榄香烯	Terpenoids	萜类	-	-	33880-83-0	746825	8.0188e+06	779104	72517	64974.8	61993.3	1.3186	0.326668	0.541219	0.0209	-5.58035	down
XMW0975	GC-MS	C15H24	4-(1,5-dimethyl-1,4-hexadienyl)-1-methyl-Cyclohexene	4-（1,5-二甲基-1,4-己二烯基）-1-甲基-环己烯	Terpenoids	萜类	-	-	17627-44-0	3.11827e+07	2.59176e+07	3.17704e+07	4.46419e+06	4.11438e+06	1.74667e+06	1.41771	0.00142754	0.0663258	0.116183	-3.10553	down
WMW0003	GC-MS	C15H24	Eremophilene	佛术烯	Terpenoids	萜类	-	-	10219-75-7	74621.2	139939	91827.8	7293.56	6420.06	4391.31	1.44627	0.0387427	0.242405	0.0590915	-4.08091	down
XMW0742	GC-MS	C15H24	10,10-Dimethyl-2,6-dimethylenebicyclo[7.2.0]undecane	10,10-二甲基-2,6-二亚甲基双环[7.2.0]十一烷	Terpenoids	萜类	-	-	357414-37-0	2.75297e+06	3.62622e+06	2.66941e+06	523097	471936	701515	1.4361	0.0119924	0.161107	0.187493	-2.41509	down
D119	GC-MS	C14H20O	2-Benzylidene-1-heptanol	2-苄叉基-1-庚醇	Alcohol	醇	-	-	101-85-9	633656	270553	509416	43581.8	29059.1	27102.4	1.42847	0.0540804	0.264901	0.0705586	-3.82503	down
XMW0552	GC-MS	C13H16O2	2,2'-Isopropylidenebis(5-methylfuran)	2,2'-异亚丙基双（5-甲基呋喃）	Heterocyclic compound	杂环化合物	-	-	59212-75-8	6.8493e+06	8.7472e+06	5.39997e+06	2.4678e+06	1.429e+06	4.359e+06	1.19341	0.0311214	0.227665	0.393199	-1.34667	down
XMW1176	GC-MS	C13H16O2	Benzeneacetic Acid, .alpha.-cyclopentyl-	α-环戊基-苯乙酸	Acid	酸	-	-	3900-93-4	222932	78035.4	127559	13579.3	7043.9	13474.9	1.39832	0.0902236	0.304197	0.0795706	-3.65162	down
WMW0059	GC-MS	C13H16O2	E-2-Hexenyl benzoate	E-2-己烯基苯甲酸酯	Ester	酯	-	-	76841-70-8	71696	125842	51661.1	11390.2	6477.21	19813.3	1.338	0.0819771	0.301676	0.151207	-2.7254	down
XMW0841	GC-MS	C13H16O2	1-Penten-3-one, 1-(4-methoxyphenyl)-4-methyl-	1-（4-甲氧基苯基）-4-甲基-1-戊烯-3-酮	Ketone	酮	-	-	103-13-9	339616	7.44873e+06	414270	100790	51001.6	42353.7	1.18875	0.374956	0.571388	0.0236688	-5.40087	down
XMW0861	GC-MS	C11H12N2O2	7-Methoxy-4-methyl-1,3-dihydro-2H-1,5-benzodiazepin-2-one	7-甲氧基-4-甲基-1,3-二氢-2H-1,5-苯并二氮杂-2-酮	Ketone	酮	-	-	64376-03-0	33723	11002	21403.2	1710	851.995	2107.71	1.38717	0.0887482	0.30281	0.070616	-3.82386	down
D327	GC-MS	C15H22	(4R,4aR)-4,4a-Dimethyl-6-(prop-1-en-2-yl)-1,2,3,4,4a,7-hexahydronaphthalene	（4R，4aR）-4,4a-二甲基-6-（丙-1-烯-2-基）-1,2,3,4,4a，7-六氢萘	Terpenoids	萜类	-	-	28908-26-1	59213.5	47118	43809.7	13941.6	10532.1	35951.3	1.16575	0.0431119	0.245995	0.402455	-1.3131	down
KMW0626	GC-MS	C15H22	Naphthalene, 1,2,3,4-tetrahydro-1,6-dimethyl-4-(1-methylethyl)-, (1S-cis)-	去氢白菖烯	Terpenoids	萜类	-	-	483-77-2	2.60907e+06	2.19417e+06	2.70166e+06	433119	384950	185553	1.42175	0.0013164	0.0651805	0.133729	-2.90262	down
KMW0620	GC-MS	C15H22	Benzene, 1-(1,5-dimethyl-4-hexenyl)-4-methyl-	α-姜黄素	Terpenoids	萜类	-	-	644-30-4	285587	323275	248690	67335.6	58633.2	75452.7	1.44618	0.00721249	0.135456	0.23488	-2.09001	down
XMW0227	GC-MS	C15H22	aR-Himachalene	aR-雪松烯	Terpenoids	萜类	-	-	19419-67-1	57694	43618.1	40947.2	12734.8	9445.22	33417.3	1.16496	0.0400005	0.242405	0.390816	-1.35544	down
XMW0992	GC-MS	C15H22	(2R,8R,8aS)-8,8a-Dimethyl-2-(prop-1-en-2-yl)-1,2,3,7,8,8a-hexahydronaphthalene	（2R，8R，8aS）-8,8a-二甲基-2-（丙-1-烯-2-基）-1,2,3,7,8,8a-六氢萘	Terpenoids	萜类	-	-	5090-61-9	725509	753237	606147	67859.9	41238.6	27394	1.44153	0.00299517	0.0833265	0.0654674	-3.93308	down
XMW0386	GC-MS	C15H22	cis-Calamenene	顺式卡拉曼烯	Terpenoids	萜类	-	-	72937-55-4	123529	86422.8	98103.3	34759.9	22103.5	65968.5	1.20682	0.0233744	0.206636	0.398733	-1.32651	down
D310	GC-MS	C15H22	(8R,8aS)-8,8a-Dimethyl-2-(propan-2-ylidene)-1,2,3,7,8,8a-hexahydronaphthalene	（8R，8aS）-8,8a-二甲基-2-（丙烷-2-亚烷基）-1,2,3,7,8,8a-六氢萘	Terpenoids	萜类	-	-	27840-40-0	336484	276636	214505	75889.6	63545.8	242305	1.05332	0.106711	0.329058	0.461249	-1.11638	down
KMW0542	GC-MS	C12H24O2	Decanoic acid, ethyl ester	癸酸乙酯	Ester	酯	-	-	110-38-3	1466.61	15340.4	9	9	9	9	1.01024	0.370597	0.569366	0.00160561	-9.28266	down
KMW0704	GC-MS	C15H20	.alpha.-Calacorene	Α-二去氢菖蒲烯	Terpenoids	萜类	-	-	21391-99-1	14562.1	31900.6	14687.4	3146.18	1639.8	3033.14	1.3892	0.0898376	0.304122	0.127868	-2.96727	down
XMW0136	GC-MS	C15H20	4-Isopropyl-6-methyl-1-methylene-1,2,3,4-tetrahydronaphthalene	4-异丙基-6-甲基-1-亚甲基-1,2,3,4-四氢萘	Terpenoids	萜类	-	-	50277-34-4	582602	816999	404907	282759	109918	78453.7	1.26947	0.0450877	0.247093	0.261085	-1.93741	down
NMW0366	GC-MS	C13H12O2	3-phenoxy-Benzenemethanol	3-苯氧基-苯甲醇	Alcohol	醇	-	-	13826-35-2	9	9	9	37686	35732	40563	1.46311	0.00136157	0.0655446	4221.52	12.0435	up
XMW1163	GC-MS	C9H12O3S	Ethyl 2-hydroxybenzyl sulfone	2-羟基苄基砜-乙基	Phenol	酚	-	-	53380-27-1	583956	187292	296732	33564.8	15769.4	26680.9	1.39634	0.1074	0.330391	0.0711764	-3.81246	down
KMW0551	GC-MS	C14H30	Tetradecane	十四烷	Hydrocarbons	烃类	-	-	629-59-4	27640.3	286036	35001.7	3267.84	3489.36	4537.41	1.29695	0.316522	0.533592	0.0323927	-4.94819	down
w10	GC-MS	C13H26O	2-Undecanone, 6,10-dimethyl-	6,10-二甲基-2-十一烷酮	Ketone	酮	-	-	1604-34-8	6255.62	60881.5	6146.03	490.057	1092.69	354.392	1.29825	0.321898	0.536909	0.0264336	-5.24148	down
XMW1354	GC-MS	C12H22O2	cis-5-Dodecenoic Acid	顺-5-十二碳烯酸	Acid	酸	-	-	2430-94-6	38602.6	400707	28674.3	14660.1	10605.5	12315	1.07869	0.361838	0.562697	0.0803031	-3.6384	down
D153	GC-MS	C14H14O	Benzene, 1,1'-[oxybis(methylene)]bis-	1,1'-[氧双（亚甲基）]双-苯	Aromatics	芳烃	-	-	103-50-4	61522.7	49441.4	53041.5	13082.6	3910.8	14791.7	1.314	0.00087483	0.0561511	0.193805	-2.36732	down
XMW1179	GC-MS	C8H16Cl2O	Butane, 1,1'-oxybis[4-chloro-	双（4-氯丁基）醚	Halogenated hydrocarbons	卤代烃	-	-	6334-96-9	9	9	9	326458	179237	9	1.01305	0.216052	0.444537	18729.8	14.193	up
w45	GC-MS	C14H28	2-Tetradecene, (E)-	（E）-2-十四碳烯	Hydrocarbons	烃类	-	-	35953-54-9	195125	2.01008e+06	213317	26933.7	21504.4	27717.7	1.29078	0.324083	0.538997	0.0314885	-4.98903	down
XMW1260	GC-MS	C13H24O	1-Cyclohexene-1-propanol, .alpha.,2,6,6-tetramethyl-	α，2,6,6-四甲基-1-环己烯-1-丙醇	Alcohol	醇	-	-	3293-47-8	244693	424138	240407	80519.2	71374.4	132484	1.32445	0.063945	0.279243	0.312765	-1.67685	down
KMW0518	GC-MS	C12H20O2	2,6-Octadien-1-ol, 3,7-dimethyl-, acetate, (Z)-	乙酸橙花酯	Ester	酯	-	-	141-12-8	21478.7	21965.6	51780.4	9462.94	5605.29	15908.8	1.16392	0.157586	0.384577	0.325304	-1.62014	down
WMW0175	GC-MS	C12H20O2	.delta.-Terpineol, acetate	δ-松油醇，醋酸盐	Terpenoids	萜类	-	-	93836-50-1	1.45848e+06	519500	333494	9	9	9	1.45819	0.157363	0.384577	1.16809e-05	-16.3855	down
WMW0089	GC-MS	C13H22O	5,9-Undecadien-2-one, 6,10-dimethyl-	6,10-二甲基-5,9-十一碳烯-2-酮	Ketone	酮	-	-	689-67-8	1.00586e+06	2.27854e+06	1.43071e+06	358770	399960	575521	1.32967	0.0904916	0.304509	0.282973	-1.82126	down
KMW0563	GC-MS	C13H22O	5,9-Undecadien-2-one, 6,10-dimethyl-, (E)-	（E）-6,10-二甲基-5,9-十一碳烯-2-酮	Ketone	酮	-	-	3796-70-1	1.00586e+06	2.27854e+06	1.43071e+06	362041	390824	561551	1.33543	0.0900256	0.304122	0.278766	-1.84287	down
w39	GC-MS	C13H22O	2-Butanone, 4-(2,6,6-trimethyl-2-cyclohexen-1-yl)-	4-（2,6,6-三甲基-2-环己烯-1-基）-2-丁酮	Ketone	酮	-	-	31499-72-6	790583	6.32466e+06	755965	69665.6	50492.4	58972.7	1.34564	0.300157	0.520951	0.0227577	-5.4575	down
XMW0198	GC-MS	C13H22O	3-Buten-2-ol, 4-(2,6,6-trimethyl-2-cyclohexen-1-yl)-, (3E)-	（3E）-4-（2,6,6-三甲基-2-环己烯-1-基）-3-丁烯-2-醇	Alcohol	醇	-	-	25312-34-9	1.15639e+06	1.64223e+06	1.00838e+06	362339	268843	658765	1.28276	0.0280907	0.218519	0.338835	-1.56134	down
XMW0423	GC-MS	C13H22O	6,8-Nonadien-2-one, 8-methyl-5-(1-methylethyl)-, (E)-	（E）-8-甲基-5-（1-甲基乙基）-6,8-壬二烯-2-酮	Ketone	酮	-	-	54868-48-3	180064	9.77107e+06	148760	30015.7	44459.5	46922.4	1.0437	0.408039	0.577188	0.0120197	-6.37846	down
D393	GC-MS	C12H18O2	1,3-Cyclohexadiene-1-carboxylic acid, 2,6,6-trimethyl-, ethyl ester	1,3-环己二烯-1-羧酸，2,6,6-三甲基-乙酯	Ester	酯	-	-	35044-59-8	3.24736e+07	3.00677e+07	2.3374e+07	7.52158e+06	9.11429e+06	9.8332e+06	1.42609	0.0140719	0.164254	0.308083	-1.69861	down
XMW0951	GC-MS	C12H18O2	2-Cyclohexen-1-ol, 2-methyl-5-(1-methylethenyl)-, acetate, (1R-cis)-	（1S-顺式）-2-甲基-5-（1-甲基乙烯基）-2-环己烯-1-基乙酸酯	Ester	酯	-	-	7111-29-7	9	9	9	138385	78823.6	9	1.01301	0.212576	0.442289	8045.09	12.9739	up
D249	GC-MS	C11H14O3	Ethanol, 2-phenoxy-, propanoate	丙酸2-苯氧乙酯	Ester	酯	-	-	23495-12-7	335839	145802	288785	123544	67234.3	162848	1.05693	0.119857	0.346187	0.459001	-1.12343	down
D362	GC-MS	C10H10O4	3,4-Methylenedioxybenzyl acetate	3,4-亚甲基二氧苄基乙酸酯	Ester	酯	-	-	326-61-4	1.44696e+06	1.28791e+06	1.527e+06	250772	31399.2	78924.4	1.34799	0.000181032	0.0407197	0.0847271	-3.56103	down
NMW0291	GC-MS	C13H20O	Phenol, 4-heptyl-	4-庚基-苯酚	Phenol	酚	-	-	1987-50-4	237058	86024.4	178377	27783.4	19440.7	21688.4	1.38696	0.0812555	0.300341	0.137424	-2.86329	down
XMW1256	GC-MS	C13H20O	2-Butanone, 4-(2,6,6-trimethyl-1,3-cyclohexadien-1-yl)-	4-（2,6,6-三甲基-1,3-环己二烯-1-基）-2-丁酮	Ketone	酮	-	-	20483-36-7	3.21349e+06	5.57482e+07	2.83114e+06	1.26115e+06	611940	1.81843e+06	1.01257	0.385368	0.575809	0.0597403	-4.06515	down
D425	GC-MS	C13H20O	3-Cyclohexene-1-carboxAldehyde, 4-(4-methyl-3-pentenyl)-	4-（4-甲基-3-戊烯基）-3-环己烯-1-甲醛	Aldehyde	醛	-	-	37677-14-8	148569	273615	130672	21810.3	12438.5	7737.97	1.41299	0.0620181	0.275212	0.0759454	-3.71889	down
KMW0554	GC-MS	C13H20O	.alpha.-Ionone	α-紫罗兰酮	Terpenoids	萜类	-	-	127-41-3	2.952e+06	1.20793e+07	2.4345e+06	1.49888e+06	647521	2.19425e+06	1.02911	0.29639	0.519927	0.248523	-2.00855	down
NMW0184	GC-MS	C13H20O	Ionone	紫罗兰酮	Terpenoids	萜类	-	-	8013-90-9	2.921e+06	1.20261e+07	2.4345e+06	1.49888e+06	646356	2.19425e+06	1.02702	0.297175	0.519927	0.24966	-2.00197	down
D388	GC-MS	C12H16O2	Butanoic acid, 1-phenylethyl ester	丁酸1-苯乙基酯	Ester	酯	-	-	3460-44-4	788856	4.41446e+07	659573	83414.2	116217	148250	1.11248	0.406812	0.577188	0.00763013	-7.03408	down
XMW0813	GC-MS	C12H17NO	Pentanal O-benzyloxime	邻苄基肟戊醛	Nitrogen compounds	含氮化合物	-	-	72399-21-4	75225.3	71236.7	57463.4	10966.4	11206.4	26907.8	1.34485	0.00237998	0.0808725	0.240679	-2.05482	down
XMW0097	GC-MS	C14H22	1,5-Cycloundecadiene, 8,8-dimethyl-9-methylene-	8,8-二甲基-9-亚甲基-1,5-环癸二烯	Hydrocarbons	烃类	-	-	62338-54-9	2.19664e+06	3.42242e+06	1.159e+06	447578	319880	182291	1.35605	0.0951794	0.313939	0.140121	-2.83525	down
NMW0281	GC-MS	C12H14O2	3-Butylisobenzofuran-1(3H)-one	3-丁基异苯并呋喃-1（3H）-酮	Heterocyclic compound	杂环化合物	-	-	6066-49-5	17156.3	7611.03	17132.7	5310.26	5047.05	9177.47	1.07265	0.129765	0.357941	0.466223	-1.10091	down
XMW0971	GC-MS	C12H14O2	Benzyl angelate	苯甲酸苄酯	Ester	酯	-	-	37526-87-7	7.13565e+06	9.44203e+06	5.84502e+06	2.32278e+06	1.63416e+06	4.20013e+06	1.25725	0.025349	0.209697	0.363786	-1.45884	down
NMW0357	GC-MS	C11H10O3	7-Ethoxycoumarin	7-乙氧基香豆素	Heterocyclic compound	杂环化合物	-	-	31005-02-4	16622.7	5655.18	15125.6	1.68591e+06	1.59567e+06	1.84572e+06	1.45041	0.00181534	0.0714996	137.081	7.09888	up
XMW0940	GC-MS	C13H16O	Benzenemethanol, .alpha.-2-cyclohexen-1-yl-	α.-2-环己烯-1-基-苯甲醇	Alcohol	醇	-	-	5723-89-7	71057.2	60872.2	113771	4625.13	2510.74	4384.68	1.43955	0.0402878	0.242405	0.0468887	-4.41462	down
NMW0255	GC-MS	C11H8O3	Plumbagin	白花丹醌	Phenol	酚	-	-	481-42-5	14854.1	14332	21626.9	3210.72	2732.6	11981.3	1.14135	0.0484892	0.252085	0.352757	-1.50325	down
KMW0629	GC-MS	C12H26O	1-Dodecanol	月桂醇	Alcohol	醇	-	-	112-53-8	207107	200132	144785	94332.1	65530	95322.2	1.33961	0.0216365	0.201592	0.462271	-1.11319	down
NMW0363	GC-MS	C11H6O3	Ficusin	呋喃香豆素	Heterocyclic compound	杂环化合物	-	-	66-97-7	627.432	484.806	3478.07	81352.5	75649.4	88814	1.40861	0.00130062	0.0651805	53.551	5.74284	up
XMW0099	GC-MS	C13H28	Decane, 2,3,5-trimethyl-	2,3,5-三甲基-癸烷	Hydrocarbons	烃类	-	-	62238-11-3	157398	1.57187e+06	378276	116144	82048.3	167890	1.01665	0.317177	0.533658	0.173701	-2.52532	down
KMW0488	GC-MS	C13H28	Tridecane	十三烷	Hydrocarbons	烃类	-	-	629-50-5	38240	49452.4	39903.7	101943	171671	318147	1.33451	0.135428	0.361071	4.63776	2.21343	up
KMW0545	GC-MS	C12H24O	Dodecanal	月桂醛	Aldehyde	醛	-	-	112-54-9	668475	5.57517e+06	637841	330357	158494	480150	1.01485	0.352559	0.55654	0.140813	-2.82815	down
KMW0674	GC-MS	C12H24O	trans-2-Dodecen-1-ol	（E）-2-十二烯-1-醇	Alcohol	醇	-	-	69064-37-5	46838.1	49385.2	38032.4	21711.2	16324.9	21115.3	1.40281	0.00789752	0.136864	0.440587	-1.1825	down
NMW0209	GC-MS	C11H20O2	Undecylenic Acid	十一碳烯酸	Acid	酸	-	-	112-38-9	67089.5	93041.7	66890.6	8997.64	7267.24	18404.6	1.39096	0.00966663	0.146727	0.152714	-2.71109	down
WMW0181	GC-MS	C11H20O2	4-Decenoic acid, methyl ester, Z-	Z-4-癸烯酸甲酯	Ester	酯	-	-	7367-83-1	4621.03	2026.16	6260.11	1103.61	1817.54	1774.68	1.13319	0.152368	0.381029	0.363812	-1.45873	down
KMW0637	GC-MS	C11H20O2	2H-Pyran-2-one, 6-hexyltetrahydro-	δ-十一内酯	Ester	酯	-	-	710-04-3	7065.41	7590.41	5849.27	1938.02	1616.92	5369.83	1.13576	0.0677993	0.283268	0.435247	-1.2001	down
XMW0128	GC-MS	C10H17NS	2-Butyl-5-propylthiazole	2-丁基-5-丙基噻唑	Heterocyclic compound	杂环化合物	-	-	52414-86-5	63775.8	1.19245e+06	66719.1	24020.8	11985.4	32458.2	1.05363	0.381578	0.575522	0.0517514	-4.27226	down
KMW0449	GC-MS	C11H18O2	Bicyclo[2.2.1]heptan-2-ol, 1,7,7-trimethyl-, formate, endo-	甲酸冰片	Acid	酸	-	-	7492-41-3	9	107803	135117	9	9	9	1.03804	0.188617	0.417952	0.000111144	-13.1353	down
NMW0215	GC-MS	C5H11NS3	N,N-Dimethyl-1,2,3-trithian-5-Amine	N，N-二甲基-1,2,3-三噻吩-5-胺	Amine	胺	-	-	31895-21-3	15603.4	9208.37	9348.63	17065.6	22305.3	106762	1.03	0.327582	0.542216	4.27785	2.09689	up
XMW1129	GC-MS	C10H12O3	Ethyl mandelate	扁桃酸乙酯	Ester	酯	-	-	774-40-3	4.00127e+06	1.73364e+07	3.3793e+06	2.0315e+06	887404	2.95402e+06	1.03275	0.300907	0.520951	0.237607	-2.07335	down
XMW0280	GC-MS	C10H12O3	Carbonic acid, phenyl propyl ester	碳酸苯丙酯	Ester	酯	-	-	13183-16-9	86858.9	95436.4	145568	22047.2	5678.57	15591.4	1.35463	0.028819	0.22197	0.13212	-2.92008	down
NMW0353	GC-MS	C9H9NO3	Hippuric Acid	N-苯甲酰甘氨酸	Acid	酸	-	-	495-69-2	49076	26770	16580	1077193	583135	1233600	1.43002	0.0410583	0.242405	31.3108	4.96859	up
KMW0511	GC-MS	C11H14O2	Butyl benzoate	苯甲酸丁酯	Ester	酯	-	-	136-60-7	778551	4.41171e+07	643969	80244.4	114017	137144	1.11574	0.406997	0.577188	0.00727731	-7.10238	down
XMW0553	GC-MS	C10H10O3	2-Acetoxyacetophenone	2-乙酰氧基苯乙酮	Aromatics	芳烃	-	-	7250-94-4	807369	6.29733e+06	742181	77611.5	70117	88710.7	1.3255	0.302124	0.522015	0.0301316	-5.05258	down
KMW0574	GC-MS	C11H12O2	2-Propenoic acid, 3-phenyl-, ethyl ester	肉桂酸乙酯	Ester	酯	-	-	103-36-6	1.93039e+06	3.03728e+06	1.55949e+06	696072	416996	1.26098e+06	1.18937	0.0688965	0.28342	0.363719	-1.45911	down
NMW0272	GC-MS	C10H7NO2	Naphthalene, 2-nitro-	2-硝基-萘	Phenol	酚	-	-	581-89-5	6269.97	6287.66	4523.12	9	9	2832	1.09633	0.0187377	0.192077	0.166855	-2.58334	down
KMW0523	GC-MS	C11H24O	1-Undecanol	十一烷醇	Alcohol	醇	-	-	112-42-5	36666.2	1.91996e+06	35901.7	3940.91	4547.42	3708.01	1.17249	0.403401	0.577188	0.00612103	-7.35201	down
D141	GC-MS	C10H20O2	Acetic acid, 2-ethylhexyl ester	乙酸2-乙基己酯	Ester	酯	-	-	103-09-3	8309.52	14943.5	19461.6	3636.75	1182.18	6781.86	1.14856	0.065868	0.281156	0.271589	-1.8805	down
XMW1226	GC-MS	C10H20O2	Hexanoic acid, 2-methylpropyl ester	2-甲基丙酯-己酸	Ester	酯	-	-	105-79-3	13157.2	3667.05	4795.06	23424.4	20992	16810	1.21295	0.0272743	0.21575	2.83202	1.50183	up
D313	GC-MS	C10H20O2	3-Hexene, 1-(1-ethoxyethoxy)-, (Z)-	（Z）-1-（1-乙氧基乙氧基）己-3-烯	Aldehyde	醛	-	-	28069-74-1	1951.09	1910.77	1932.46	9	9	1894.91	1.01678	0.175777	0.404402	0.330135	-1.59887	down
KMW0366	GC-MS	C10H18O2	Butanoic acid, 3-hexenyl ester, (Z)-	（Z）-3-己烯基丁酸酯	Ester	酯	-	-	16491-36-4	34358	9	9	59193.3	32630	79796.8	1.07632	0.0639832	0.279243	4.99244	2.31974	up
NMW0162	GC-MS	C10H18O2	8-Methyl-6-nonenoic Acid	8-甲基-6-壬烯酸	Acid	酸	-	-	21382-25-2	34359.7	2.01078e+06	33202.5	5445.73	9	9	1.22213	0.404431	0.577188	0.00262889	-8.57133	down
NMW0127	GC-MS	C10H18O2	6-Octenoic Acid, 3,7-dimethyl-	3,7-二甲基-6-辛烯酸	Acid	酸	-	-	502-47-6	5.82003e+06	2.17472e+06	1.48343e+06	9	9	9	1.45966	0.143318	0.370341	2.84865e-06	-18.4213	down
XMW0246	GC-MS	C10H16O2	OxiranecarboxAldehyde, 3-methyl-3-(4-methyl-3-pentenyl)-	3-甲基-3-（4-甲基-3-戊烯基）-环氧乙烷甲醛	Aldehyde	醛	-	-	16996-12-6	203200	269517	218948	976598	788785	1.68057e+06	1.40449	0.076614	0.296254	4.98211	2.31676	up
D344	GC-MS	C11H18O	(E,E)-2,4-Undecadienal	（E，E）-2,4-十一烯醛	Aldehyde	醛	-	-	30361-29-6	4.70539e+06	2.60725e+07	4.07042e+06	2.29973e+06	1.07442e+06	3.31837e+06	1.03414	0.323539	0.538611	0.192047	-2.38047	down
XMW0424	GC-MS	C11H18O	2,6-Dimethyl-1-nonen-3-yn-5-ol	2,6-二甲基-1-壬烯基-5-醇	Alcohol	醇	-	-	19780-98-4	20202.1	16166.5	24865.7	54608.2	44758.9	46873.7	1.39515	0.00215171	0.0745784	2.38822	1.25594	up
NMW0151	GC-MS	C10H14O2	Bicyclo[3.1.1]hept-2-ene-2-carboxylic acid, 6,6-dimethyl-	6,6-二甲基-双环[3.1.1]庚-2-烯-2-羧酸	Terpenoids	萜类	-	-	19250-17-0	137724	158925	119495	47096.3	36210.3	77907.2	1.30843	0.00751022	0.136864	0.387399	-1.36811	down
XMW0472	GC-MS	C9H10O3	1,2-Ethanediol, monobenzoate	1,2-乙二醇单苯甲酸酯	Ester	酯	-	-	94-33-7	3.61459e+06	4.07123e+07	3.88289e+06	456554	332279	337833	1.30381	0.330758	0.542807	0.0233701	-5.41919	down
XMW1439	GC-MS	C9H11NO2	Benzene, (1-nitropropyl)-	（1-硝基丙基）-苯	Nitrogen compounds	含氮化合物	-	-	5279-14-1	1.56535e+06	508399	360893	165721	56395.2	205567	1.18328	0.218545	0.447002	0.175666	-2.5091	down
D359	GC-MS	C10H16N2	Pyrazine, 2,3-dimethyl-5-(1-methylpropyl)-	2,3-二甲基-5-（1-甲基丙基）-吡嗪	Heterocyclic compound	杂环化合物	-	-	32263-00-6	9	9	9	15352.5	10357.6	34594.1	1.45891	0.112797	0.338935	2233.49	11.1251	up
D343	GC-MS	C10H12O2	3-Methoxyphenyl acetone	3-甲氧苯基丙酮	Ketone	酮	-	-	3027-13-2	60461.3	240701	53741.1	32481.6	12716.6	49803.6	1.01201	0.291403	0.517102	0.267683	-1.9014	down
KMW0601	GC-MS	C10H12O2	2-Butanone, 4-(4-hydroxyphenyl)-	覆盆子酮	Ketone	酮	-	-	5471-51-2	387453	1.33583e+06	318606	81818.2	44040.5	122748	1.28147	0.209662	0.441488	0.121753	-3.03797	down
D143	GC-MS	C10H12O2	Benzenepropanoic acid, methyl ester	苯丙酸甲酯	Ester	酯	-	-	103-25-3	1379.05	1810.32	9	25256.4	4906.79	30960.6	1.08559	0.133997	0.358603	19.1109	4.25632	up
XMW1406	GC-MS	C10H12O2	2'-Ethoxyacetophenone	2'-乙氧基苯乙酮	Ketone	酮	-	-	2142-67-8	340997	333555	227636	151990	76668.9	92733.7	1.33538	0.0162331	0.175824	0.356236	-1.48909	down
NMW0264	GC-MS	C9H8O3	2-Propenoic Acid, 3-(3-hydroxyphenyl)-	3-（3-羟苯基）-2-丙酸	Acid	酸	-	-	588-30-7	28171.5	26716.2	37077.3	4629.74	5677.18	6365.32	1.44108	0.014525	0.166701	0.181289	-2.46364	down
XMW0786	GC-MS	C12H18	Benzene, 1,3,5-triethyl-	1,3,5-三乙基-苯	Aromatics	芳烃	-	-	102-25-0	22928.6	11031.7	22269.6	9	1217.58	4969.26	1.01512	0.0361354	0.241686	0.110188	-3.18197	down
XMW0470	GC-MS	C10H14N2	1-ButanAmine, N-(2-pyridinylmethylene)-	N-（2-吡啶基亚甲基）-1-丁胺	Amine	胺	-	-	7032-24-8	4.21148e+06	4.91594e+07	4.5423e+06	516998	391917	352805	1.30483	0.333304	0.543383	0.0217864	-5.52043	down
D102	GC-MS	C11H14O	1-Pentanone, 1-phenyl-	1-苯基-1-戊酮	Ketone	酮	-	-	1009-14-9	770840	4.41471e+07	642249	81874.4	115193	138631	1.11258	0.407166	0.577188	0.00736823	-7.08447	down
XMW0805	GC-MS	C10H10S	Benzo[b]thiophene, 2-ethyl-	2-乙基-苯并[b]噻吩	Heterocyclic compound	杂环化合物	-	-	1196-81-2	752372	8.97226e+06	850217	117900	83422.1	94119.9	1.28096	0.335372	0.545411	0.0279382	-5.16162	down
XMW1310	GC-MS	C9H18O2	Isobutyl isovalerate	异戊酸异丁酯	Ester	酯	-	-	589-59-3	22031.5	17637.4	27145.7	104440	33421.2	31940.1	1.00188	0.287076	0.514481	2.54138	1.34561	up
WMW0087	GC-MS	C9H18O2	Butanoic Acid, 3-methylbutyl ester	丁酸异戊酯	Acid	酸	-	-	106-27-4	8794.05	8838.33	15613.4	9	9	9	1.46081	0.0394118	0.242405	0.000812133	-10.266	down
XMW0449	GC-MS	C8H14O3	Butanoic acid, anhydride	丁酸酸酐	Others	其它类	-	-	106-31-0	4513.88	4945.07	9349.82	9	9	9	1.45933	0.0558574	0.26964	0.0014355	-9.44423	down
XMW0403	GC-MS	C11H24	Nonane, 2,5-dimethyl-	2,5-二甲基壬烷	Hydrocarbons	烃类	-	-	17302-27-1	133917	175723	209687	1.04586e+06	722725	903882	1.4319	0.0129648	0.162707	5.14601	2.36345	up
D440	GC-MS	C10H20O	Cyclohexanol, 1-methyl-4-(1-methylethyl)-, cis-	1-甲基-4-（1-甲基乙基）-环己醇	Terpenoids	萜类	-	-	3901-95-9	47566	45206.9	111337	24951	14202.7	38300.4	1.10163	0.182658	0.414243	0.379472	-1.39794	down
D202	GC-MS	C9H16O2	3-Hexen-1-ol, propanoate, (Z)-	（Z）-3-己基丙酸酯	Ester	酯	-	-	33467-74-2	57245.5	43395.7	40851.3	191495	1.07473e+06	610153	1.34636	0.151491	0.380484	13.2613	3.72915	up
NMW0098	GC-MS	C8H13NO2	Arecoline	槟榔碱	Heterocyclic compound	杂环化合物	-	-	63-75-2	2945.24	3632.64	6982.46	11308.5	9967.86	20147.7	1.26607	0.0857099	0.30281	3.0548	1.61108	up
XMW1472	GC-MS	C11H22	Cyclohexane, 1-ethyl-2-propyl-	1-乙基-2-丙基-环己烷	Hydrocarbons	烃类	-	-	62238-33-9	34855.7	36668	65765.2	19824.3	13577.9	29922.4	1.14208	0.117041	0.344813	0.461251	-1.11638	down
D401	GC-MS	C10H18O	2-Isopropyl-5-methylhex-2-enal	2-异丙基-5-甲基己烯醛	Aldehyde	醛	-	-	35158-25-9	26543.1	17237.7	21020.1	78538	230356	174079	1.38295	0.0873906	0.30281	7.45318	2.89786	up
XMW0896	GC-MS	C10H18O	5-Nonen-4-one, 6-methyl-	6-甲基-5-壬烯-4-酮	Ketone	酮	-	-	7036-98-8	69143.5	69499.6	118798	32102.8	20380.1	53240.6	1.18274	0.0715507	0.286215	0.410671	-1.28394	down
XMW1126	GC-MS	C10H18O	2-Cyclohexen-1-ol, 1-methyl-4-(1-methylethyl)-, trans-	反式-1-甲基-4-（1-甲基乙基）-2-环己烯-1-醇	Terpenoids	萜类	-	-	29803-81-4	95394.5	96482.4	159133	51321.7	31777.2	71772.8	1.19539	0.069846	0.283796	0.441217	-1.18044	down
XMW1131	GC-MS	C8H10O3	2,5-Furandione, 3-methyl-4-propyl-	3-甲基-4-丙基-2,5-呋喃二酮	Ketone	酮	-	-	16493-20-2	9	9	9	9	1006.69	2167.06	1.04707	0.233667	0.454994	117.88	6.88117	up
NMW0234	GC-MS	C7H6O4	Patulin	帕特林	Alcohol	醇	-	-	149-29-1	130234	261308	107833	17652	9	3800.47	1.08943	0.0778624	0.296736	0.0429768	-4.5403	down
XMW0663	GC-MS	C9H16N2	3,5-Dimethyl-1-butylpyrazole	3,5-二甲基-1-丁基吡唑	Heterocyclic compound	杂环化合物	-	-	2655-37-0	156489	102184	87707	259248	145664	448430	1.10831	0.190698	0.417952	2.4636	1.30077	up
XMW1137	GC-MS	C10H16O	Ethanone, 1-(1,3-dimethyl-3-cyclohexen-1-yl)-	1-（1,3-二甲基-3-环己烯-1-基）-乙酮	Terpenoids	萜类	-	-	51733-68-7	9	9	17483.9	21676.6	22554.1	440127	1.11429	0.380221	0.573975	27.6745	4.79049	up
XMW1448	GC-MS	C10H16O	3,6-Dimethyl-2,3,3a,4,5,7a-hexahydrobenzofuran	3,6-二甲基-2,3,3a，4,5,7a-六氢苯并呋喃	Heterocyclic compound	杂环化合物	-	-	70786-44-6	269025	216599	191110	733389	452014	1.27444e+06	1.30761	0.131552	0.357941	3.63487	1.8619	up
XMW0725	GC-MS	C10H16O	(-)-cis-Isopiperitenol	（-）-顺式异胡椒醇	Terpenoids	萜类	-	-	96555-02-1	84487.8	77548.5	139702	37888.2	27264.1	74487.6	1.10399	0.0967909	0.3152	0.462785	-1.11158	down
XMW0166	GC-MS	C10H16O	3,7-Nonadien-2-one, 8-methyl-, (E)-	（E）-8-甲基-3,7-壬二烯-2-酮	Ketone	酮	-	-	35408-14-1	25664	8576.08	16532.7	50987.4	38492.2	33485.7	1.19168	0.0285643	0.220991	2.42188	1.27612	up
KMW0181	GC-MS	C10H16O	2,3-Dehydro-1,8-cineole	2,3-脱氢-1,8-桉树脑	Terpenoids	萜类	-	-	92760-25-3	35611.2	2502.22	16839.1	61110.7	44665.4	314727	1.08053	0.29743	0.519927	7.65213	2.93586	up
XMW0764	GC-MS	C10H16O	(S)-(-)-(4-Isopropenyl-1-cyclohexenyl)methanol	（S）-（-）-（4-异丙烯基-1-环己烯基）甲醇	Terpenoids	萜类	-	-	18457-55-1	1.75784e+06	639848	430461	9	9	9	1.45872	0.149373	0.3795	9.54688e-06	-16.6765	down
NMW0236	GC-MS	C8H8O3	Benzeneacetic Acid, 4-hydroxy-	4-羟基-苯乙酸	Acid	酸	-	-	156-38-7	368885	1.29316e+06	307256	80833.1	43246.3	122727	1.274	0.213035	0.442289	0.125327	-2.99623	down
NMW0197	GC-MS	C8H8O3	Benzoic Acid, 4-methoxy-	4-甲氧基苯甲酸	Aromatics	芳烃	-	-	100-09-4	808888	1.26903e+06	647265	258347	207732	438810	1.28278	0.0682337	0.283268	0.332047	-1.59054	down
XMW1316	GC-MS	C8H9NO2	4-Methoxyformanilide	4-甲氧基甲酰苯胺	Amine	胺	-	-	5470-34-8	1207.54	54554.3	2678.13	9	9	9	1.37831	0.382599	0.575559	0.000462012	-11.0798	down
XMW0738	GC-MS	C8H9NO2	Benzoic acid, 4-amino-, methyl ester	苯甲酸4-氨基甲酯	Ester	酯	-	-	619-45-4	229283	1.34759e+07	192632	27737.3	33956.6	50963.2	1.09378	0.407849	0.577188	0.00810611	-6.94677	down
XMW0088	GC-MS	C6H5N3O2	Pyrolo[3,2-d]pyrimidin-2,4(1H,3H)-dione	吡咯并[3,2-d]嘧啶-2,4（1H，3H）-二酮	Ketone	酮	-	-	65996-50-1	22195	17969	23755.3	10465.7	8917.1	12454.2	1.3671	0.0105378	0.15149	0.498081	-1.00555	down
XMW1139	GC-MS	C11H18	Naphthalene, 1,2,3,4,4a,5,6,7-octahydro-4a-methyl-	1,2,3,4,4a，5,6,7-八氢-4a-甲基-萘	Aromatics	芳烃	-	-	13943-77-6	16776.7	9	9	37435.3	13571.7	368138	1.11715	0.361824	0.562697	24.957	4.64137	up
NMW0093	GC-MS	C10H14O	D-Verbenone	D-马鞭草酮	Terpenoids	萜类	-	-	18309-32-5	35480.7	32768.8	31682.8	114905	88382.8	393897	1.27333	0.231923	0.452979	5.9759	2.57915	up
XMW0968	GC-MS	C10H14O	4,7,7-Trimethylbicyclo[4.1.0]hept-3-en-2-one	4,7,7-三甲基双环[4.1.0] 庚-3-烯-2-酮	Ketone	酮	-	-	81800-50-2	3.15582e+06	1.14116e+06	721166	9	9	9	1.45879	0.155925	0.383832	5.38047e-06	-17.5038	down
XMW0615	GC-MS	C10H14O	Phenol, m-tert-butyl-	间叔丁基-苯酚	Phenol	酚	-	-	585-34-2	9	22010.8	9	40001.6	16885.1	59757.1	1.06836	0.109313	0.334698	5.29506	2.40465	up
NMW0052	GC-MS	C10H14O	2-Methyl-6-methyleneocta-2,7-dien-4-one	2-甲基-6-亚甲基辛基-2,7-二烯酮	Terpenoids	萜类	-	-	539-70-8	14548.3	5780.3	20914.6	37582.7	30778.4	25947.6	1.11804	0.0361477	0.241686	2.28665	1.19323	up
XMW1252	GC-MS	C10H14O	2(1H)-Naphthalenone, 3,4,5,6,7,8-hexahydro-	3,4,5,6,7,8-六氢-2（1H）-萘酮	Ketone	酮	-	-	13837-12-2	3.33818e+06	1.19032e+06	756244	10156.4	6877.22	16550.2	1.42989	0.159601	0.386296	0.00635485	-7.29793	down
NMW0153	GC-MS	C10H14O	Phenol, 4-butyl-	4-丁基-苯酚	Phenol	酚	-	-	1638-22-8	152736	185325	131903	58776.7	46956.7	106283	1.2317	0.0236551	0.207042	0.451132	-1.14838	down
KMW0408	GC-MS	C10H14O	Benzenemethanol, .alpha.,.alpha.,4-trimethyl-	对苯三酚	Terpenoids	萜类	-	-	1197-01-9	17795.7	9	9	37487.2	14751.8	367279	1.11579	0.360736	0.562191	23.5502	4.55767	up
NMW0128	GC-MS	C10H14O	Phenol, 4-(1-methylpropyl)-	4-（1-甲基）苯酚	Phenol	酚	-	-	99-71-8	513928	189912	125936	9	9	9	1.45771	0.147843	0.376783	3.25389e-05	-14.9075	down
XMW1088	GC-MS	C9H10O2	4-Hydroxy-2-methylacetophenone	4-羟基-2-甲基苯乙酮	Ketone	酮	-	-	875-59-2	32455.1	35676.3	36064.5	9	9	9	1.46296	0.0010836	0.062084	0.000259127	-11.9141	down
XMW0535	GC-MS	C9H10O2	p-Tolylacetic Acid	对甲苯甲酸	Aromatics	芳烃	-	-	622-47-9	120653	150897	101468	39872.4	28206.7	60282.1	1.32696	0.0129225	0.162707	0.344115	-1.53904	down
D355	GC-MS	C10H15N	2,6-Octadienenitrile, 3,7-dimethyl-, (Z)-	（2Z）-3,7-二甲基辛基-2,6-二烯腈	Nitrogen compounds	含氮化合物	-	-	31983-27-4	26822.9	41209.8	33594.1	150805	125663	253040	1.40652	0.065584	0.280688	5.21032	2.38137	up
NMW0156	GC-MS	C8H7NS	Benzene, (isothiocyanatomethyl)-	苯异硫氰酸酯	Heterocyclic compound	杂环化合物	-	-	622-78-6	153026	171507	127077	41300.1	40345.2	88910.6	1.28161	0.0115291	0.158571	0.377661	-1.40483	down
NMW0135	GC-MS	C8H7NS	Thiocyanic acid, phenylmethyl ester	苯甲基酯硫氰酸	Sulfur compounds	含硫化合物	-	-	3012-37-1	98803.1	93581.8	154372	47523.3	15449.2	28206.3	1.30461	0.0313312	0.228139	0.262947	-1.92715	down
XMW0931	GC-MS	C10H12O	8,9-Dehydrothymol	8,9-脱氢百里酚	Phenol	酚	-	-	18612-99-2	40206.1	19911.2	40475.4	4511.6	2508.31	8476.2	1.33255	0.0456059	0.247758	0.154048	-2.69855	down
D290	GC-MS	C10H12O	2-Butanone, 4-phenyl-	4-苯基-2-丁酮	Ketone	酮	-	-	2550-26-7	1714.46	2633.51	3563.76	1345.55	954.811	1144.03	1.26444	0.10227	0.32342	0.435352	-1.19974	down
KMW0452	GC-MS	C10H12O	4-(1-methylethyl)-Benzaldehyde	4-异丙基苯甲醛	Terpenoids	萜类	-	-	122-03-2	182193	18284.6	26148	13789.9	8054.43	8758.87	1.04424	0.345482	0.551512	0.135039	-2.88856	down
XMW0550	GC-MS	C7H8N4	N-Cyanomethyl-2-cyanimino-pyrrolidine	N-氰基甲基-2-氰基亚氨基吡咯烷	Heterocyclic compound	杂环化合物	-	-	134881-46-2	10809.1	12305.9	16475.9	1975.02	502.701	287.448	1.37116	0.0124716	0.162707	0.0698435	-3.83973	down
XMW1221	GC-MS	C6H12O2S	Acetic acid, (propylthio)-, methyl ester	乙酸（丙硫基）甲酯	Ester	酯	-	-	20600-65-1	573882	973846	969970	142308	62869.1	209605	1.3444	0.0251982	0.209697	0.164747	-2.60168	down
NMW0070	GC-MS	C9H8O2	1,2-Propanedione, 1-phenyl-	1-苯基-1,2-丙二酮	Ketone	酮	-	-	579-07-7	23150.1	11661.1	27231.4	17958	9	9	1.05434	0.129088	0.357941	0.289737	-1.78719	down
XMW1383	GC-MS	C5H9Br	bromo-Cyclopentane	溴-环戊烷	Halogenated hydrocarbons	卤代烃	-	-	137-43-9	49796.2	53768.4	58146.6	96404.1	102905	190381	1.30485	0.128055	0.357941	2.40979	1.26891	up
D455	GC-MS	C7H14O3	Pentanoic acid, 2-hydroxy-4-methyl-, methyl ester	2-羟基-4-甲基-戊酸甲酯	Ester	酯	-	-	40348-72-9	2.88407e+06	189147	1.4074e+06	5.07968e+06	3.88054e+06	2.40629e+07	1.08666	0.282017	0.509249	7.37022	2.88171	up
KMW0560	GC-MS	C9H6O2	Coumarin	香豆素	Heterocyclic compound	杂环化合物	-	-	91-64-5	350249	416098	275890	123545	76794.4	218362	1.21205	0.0232401	0.206539	0.401733	-1.31569	down
GMW0113	GC-MS	C6H10S2	Diallyl disulphide	二烯丙基二硫化物	Sulfur compounds	含硫化合物	-	-	2179-57-9	26898.6	16744.5	25242.2	70911.2	52943.1	63429.4	1.38719	0.00560262	0.122903	2.71878	1.44296	up
NMW0355	GC-MS	C9H7NO	1H-Indole-3-carboxaldehyde	1H-吲哚-3-甲醛	Heterocyclic compound	杂环化合物	-	-	487-89-8	28079.6	7149.23	16223.7	382561	377182	419592	1.42354	0.00021147	0.0407197	22.9208	4.51859	up
KMW0344	GC-MS	C9H20O	1-Nonanol	壬醇	Alcohol	醇	-	-	143-08-8	31239.5	39551.5	35559.1	100759	53597.2	78199.4	1.29559	0.0865289	0.30281	2.1867	1.12875	up
WMW0109	GC-MS	C8H16O2	Propanoic acid, 2-methyl-, 2-methylpropyl ester	异丁酸异丁酯	Ester	酯	-	-	97-85-8	279750	346926	474516	936192	828654	1.19493e+06	1.37447	0.0147026	0.167491	2.68779	1.42642	up
KMW0204	GC-MS	C8H16O2	Acetic acid, hexyl ester	乙酸己酯	Ester	酯	-	-	142-92-7	100736	136035	160266	823208	562215	708445	1.43051	0.0138134	0.164254	5.27374	2.39883	up
D137	GC-MS	C9H21N	N,N-dipropyl-1-PropanAmine	N，N-二丙基-1-丙胺	Amine	胺	-	-	102-69-2	11615.6	15740.7	21787.6	45546.8	37510.7	42372.7	1.36004	0.00301547	0.0833265	2.5523	1.3518	up
XMW1299	GC-MS	C10H22	Heptane, 3,3,5-trimethyl-	3,3,5-三甲基-庚烷	Hydrocarbons	烃类	-	-	7154-80-5	280019	347174	474233	937475	828293	1.19545e+06	1.37473	0.0147871	0.167491	2.68853	1.42682	up
WMW0100	GC-MS	C9H18O	3-Nonen-1-ol, (E)-	（E）-3-壬-1-醇	Alcohol	醇	-	-	10339-61-4	19073.9	7509.18	17810.2	26693.7	22710.3	47882.8	1.08693	0.138764	0.366411	2.19147	1.1319	up
w15	GC-MS	C9H18O	2-Nonen-1-ol	2-壬烯-1-醇	Alcohol	醇	-	-	22104-79-6	66074.6	48809.8	39551.5	235717	1.09545e+06	661383	1.36493	0.132152	0.357941	12.9021	3.68954	up
WMW0028	GC-MS	C9H18O	4-Heptanone, 2,6-dimethyl-	2,6-二甲基-4-庚酮	Ketone	酮	-	-	108-83-8	9320.31	6024.37	10196.5	30861.7	16229.5	22253.1	1.30818	0.0648141	0.27941	2.715	1.44095	up
D229	GC-MS	C8H14O2	Allyl isovalerate	异戊酸烯丙酯	Ester	酯	-	-	2835-39-4	391716	468783	626776	1.20344e+06	1.06357e+06	2.07583e+06	1.33227	0.0889383	0.30281	2.92	1.54597	up
D309	GC-MS	C8H14O2	Ethyl 2-hexenoate, trans-	2-己酸乙酯	Ester	酯	-	-	27829-72-7	9458.33	5323.08	6609.43	1780.9	4292.49	4296.09	1.08644	0.0763882	0.296193	0.484762	-1.04465	down
XMW0638	GC-MS	C8H14O2	2,3'-Bifuran, octahydro-	八氢-2,3'-双呋喃	Heterocyclic compound	杂环化合物	-	-	73373-15-6	19571.5	12808.4	25981.1	76278.3	80387.4	67937.9	1.39884	0.000469373	0.0488722	3.84852	1.9443	up
w07	GC-MS	C11H10	1H-Indene, 1-ethylidene-	1-亚乙基-1H-茚	Hydrocarbons	烃类	-	-	2471-83-2	9	9	80768.1	26521.4	177104	132919	1.03261	0.192888	0.420714	4.16587	2.05862	up
NMW0097	GC-MS	C8H15NO	8-Azabicyclo[3.2.1]octan-3-ol, 8-methyl-, exo-	8-甲基-8-氮杂双环[3.2.1]-3-辛烷醇	Alcohol	醇	-	-	135-97-7	359003	424008	336290	1.46414e+06	1.14976e+06	2.54496e+06	1.39559	0.0853968	0.30281	4.60901	2.20446	up
WMW0057	GC-MS	C9H16O	6-Nonenal, (Z)-	（Z）-6-壬醛	Aldehyde	醛	-	-	2277-19-2	24207	14678.7	16709.8	72960.9	219922	150747	1.38296	0.0922517	0.308039	7.9796	2.99632	up
XMW0181	GC-MS	C9H16O	5-Hepten-2-one, 4,6-dimethyl-	4,6-二甲基-5-庚-2-酮	Ketone	酮	-	-	31162-48-8	8489.11	10128.8	9087.65	2281.24	1202.01	3086.4	1.36466	0.00068592	0.0495291	0.237124	-2.07629	down
WMW0056	GC-MS	C9H16O	4-Nonenal, (E)-	（E）-4-壬醛	Aldehyde	醛	-	-	2277-16-9	26419.2	17237.7	21012	78538	230356	174079	1.3833	0.0873571	0.30281	7.4684	2.9008	up
XMW0168	GC-MS	C8H12S	3-Butylthiophene	3-丁基噻吩	Heterocyclic compound	杂环化合物	-	-	34722-01-5	2994.24	1170.92	3991.55	5556.23	3764.93	9241.19	1.02957	0.151934	0.381029	2.27572	1.18632	up
XMW0528	GC-MS	C8H12S	Thiophene, 2-butyl-	2-丁基噻吩	Heterocyclic compound	杂环化合物	-	-	1455-20-5	154282	79143.5	111017	40882.1	26371.2	42683.6	1.33586	0.06261	0.276326	0.319173	-1.64759	down
XMW0048	GC-MS	C6H5NO3	Phenol, 2-nitro-	2-硝基苯酚	Phenol	酚	-	-	88-75-5	95394.5	96381.7	159359	51321.7	31769.9	71785	1.19483	0.0704889	0.284174	0.441074	-1.18091	down
XMW0202	GC-MS	C10H18	cis-2,6-Dimethyl-2,6-octadiene	顺式-2,6-二甲基-2,6-辛二烯	Hydrocarbons	烃类	-	-	2492-22-0	41921.5	5660.59	49669.2	110024	123816	943061	1.13291	0.321267	0.53667	12.1016	3.59713	up
XMW0902	GC-MS	C10H18	2,6-Dimethyl-2-trans-6-octadiene	2,6-二甲基-2-反式-6-辛二烯	Terpenoids	萜类	-	-	2609-23-6	2.84527e+06	189019	1.40715e+06	5.07915e+06	3.88011e+06	2.40637e+07	1.08894	0.281581	0.509249	7.43519	2.89437	up
XMW0034	GC-MS	C8H14N2	2-Dimethylamino-4-methyl-pent-4-enenitrile	2-二甲基氨基-4-甲基-戊-4-烯腈	Others	其它类	-	-	94492-10-1	12551.2	17117.7	19738.9	110588	79642.3	95424.9	1.43707	0.00959584	0.146727	5.78157	2.53146	up
XMW0008	GC-MS	C9H14O	Isophorone	异佛尔酮	Ketone	酮	-	-	78-59-1	189718	135023	123525	19243.2	14042.2	27192.7	1.42155	0.0210375	0.199595	0.134916	-2.88987	down
NMW0061	GC-MS	C7H7NO2	1-methyl-2-nitro-Benzene	1-甲基-2-硝基苯	Aromatics	芳烃	-	-	88-72-2	9	9	9	1381.83	1501.36	26889.2	1.40122	0.362919	0.562906	1102.68	10.1068	up
KMW0199	GC-MS	C10H16	.beta.-Myrcene	月桂烯	Terpenoids	萜类	-	-	123-35-3	1.47185e+06	110334	747967	2.60815e+06	2.01162e+06	1.17218e+07	1.09319	0.274587	0.501433	7.0131	2.81005	up
XMW0678	GC-MS	C10H16	1,3-Cyclohexadiene, 1,5,5,6-tetramethyl-	1,5,5,6-四甲基-1,3-环己二烯	Terpenoids	萜类	-	-	514-94-3	50738.1	4428.3	60583.7	155845	161754	1.26524e+06	1.13285	0.315939	0.533592	13.6746	3.77343	up
KMW0148	GC-MS	C10H16	.alpha.-Pinene	α-蒎烯	Terpenoids	萜类	-	-	80-56-8	121899	17372.7	153657	292335	365028	3.08524e+06	1.11241	0.337345	0.546884	12.7765	3.67542	up
KMW0178	GC-MS	C10H16	Bicyclo[3.1.0]hexane, 4-methylene-1-(1-methylethyl)-	沙宾烯	Terpenoids	萜类	-	-	3387-41-5	9	8338.7	6648.86	9	9	9	1.03807	0.188657	0.417952	0.00180041	-9.11746	down
XMW0521	GC-MS	C10H16	1,7-Octadiene, 2-methyl-6-methylene-	2-甲基-6-亚甲基-1,7-辛二烯	Terpenoids	萜类	-	-	1686-30-2	4427.96	2061.24	5809.07	14675.1	18122.4	116146	1.22342	0.304342	0.523758	12.1109	3.59824	up
XMW0583	GC-MS	C8H8O2	Ethanone, 1-(3-hydroxyphenyl)-	1-（3-羟苯基）-乙酮	Ketone	酮	-	-	121-71-1	3.28553e+07	3.05678e+07	2.38565e+07	7.57632e+06	9.15719e+06	9.90858e+06	1.42758	0.0131423	0.162707	0.30525	-1.71194	down
XMW0019	GC-MS	C8H8O2	Acetophenone, 4'-hydroxy-	4'-羟基-苯乙酮	Ketone	酮	-	-	99-93-4	1.57092e+06	2.47927e+06	1.42116e+06	492938	396863	838799	1.31234	0.0482165	0.252085	0.315936	-1.66229	down
NMW0157	GC-MS	C8H9NO	Acetamide, N-phenyl-	N-苯基-乙酰胺	Amine	胺	-	-	103-84-4	250882	281477	205511	107362	68830.2	185669	1.14872	0.0461573	0.248347	0.490413	-1.02793	down
NMW0176	GC-MS	C8H9NO	Benzeneacetamide	苯乙酰胺	Amine	胺	-	-	103-81-1	1.23312e+06	1.34262e+07	1.3214e+06	160288	130410	140219	1.29622	0.328977	0.542314	0.0269649	-5.21278	down
XMW0206	GC-MS	C5H5N5	1H-Pyrazolo[3,4-d]pyrimidin-4-amine	1H-吡唑并[3,4-d]嘧啶-4-胺	Heterocyclic compound	杂环化合物	-	-	2380-63-4	39487.1	36664.3	69879.6	3335.42	2333.37	3935.15	1.43542	0.0503033	0.257916	0.0657664	-3.92651	down
D173	GC-MS	C9H10O	BenzeneacetAldehyde, 4-methyl-	4-甲基-苯乙醛	Aldehyde	醛	-	-	104-09-6	4704.03	4241.55	4291.3	2495.39	1263.24	1658.95	1.34781	0.0102522	0.149304	0.40928	-1.28884	down
KMW0487	GC-MS	C9H10O	2-Propen-1-ol, 3-phenyl-	桂醇	Alcohol	醇	-	-	104-54-1	323887	88852.8	49835.5	34122.5	17802.6	50832.5	1.0321	0.295553	0.519927	0.222142	-2.17044	down
XMW0717	GC-MS	C9H10O	Ethanone, 1-(2-methylphenyl)-	1-（2-甲基苯基）-乙酮	Ketone	酮	-	-	577-16-2	70811	32875.8	32251.1	9	9	9	1.4599	0.0708909	0.285044	0.00019862	-12.2977	down
KMW0202	GC-MS	C8H18O	3-Octanol	3-辛醇	Alcohol	醇	-	-	589-98-0	11962.7	1732.91	6919.87	20361.8	16436.5	97521.9	1.10984	0.286911	0.514481	6.51549	2.70387	up
KMW0105	GC-MS	C7H14O2	1-Butanol, 3-methyl-, acetate	乙酸异戊酯	Ester	酯	-	-	123-92-2	1948.93	1691.74	1581.81	6813.75	14132.6	14356.7	1.41728	0.0557274	0.26964	6.75984	2.75699	up
KMW0137	GC-MS	C9H20	Nonane	壬烷	Hydrocarbons	烃类	-	-	111-84-2	386010	467160	654879	1.23943e+06	1.06476e+06	2.12542e+06	1.321	0.0899164	0.304122	2.93731	1.5545	up
WMW0058	GC-MS	C8H16O	5-Hepten-2-ol, 6-methyl-	6-甲基-5-庚-2-醇	Alcohol	醇	-	-	1569-60-4	415431	91953.3	213166	636212	485900	3.01212e+06	1.10087	0.298215	0.519927	5.7376	2.52045	up
w01	GC-MS	C8H16O	Cyclooctyl Alcohol	环辛醇	Alcohol	醇	-	-	696-71-9	2476.33	2272.01	12124.5	9	9	9	1.44013	0.22623	0.44992	0.00160021	-9.28753	down
XMW1237	GC-MS	C7H12O2	3-Pentenoic Acid, 2,2-dimethyl-	2,2-二甲基-3-戊烯酸	Acid	酸	-	-	16642-52-7	9516.82	10308.7	7498.54	2645.54	2017.06	3059.81	1.41828	0.00923361	0.14653	0.282624	-1.82305	down
w30	GC-MS	C7H12O2	2-Buten-1-ol, 3-methyl-, acetate	3-甲基-乙酸2-丁-1-醇	Alcohol	醇	-	-	1191-16-8	18600.5	12615.8	14240.3	15317.3	4452.81	2812.01	1.00699	0.1818	0.414243	0.496784	-1.00931	down
NMW0766	GC-MS	C7H12O2	2-Propenoic acid, butyl ester	2-丙酸丁酯	Ester	酯	-	-	141-32-2	42036.5	40457.6	50838.1	71807.1	90131.3	152554	1.28189	0.129769	0.357941	2.35871	1.238	up
NMW0230	GC-MS	C5H8N2O2	5,6-Dihydro-5-methyluracil	5,6-二氢-5-甲基尿嘧啶	Heterocyclic compound	杂环化合物	-	-	696-04-8	67143.6	94454.7	49641.3	27583	13412.1	40200.3	1.17369	0.0587178	0.272246	0.384376	-1.37941	down
KMW0207	GC-MS	C6H8OS	2-Furanmethanethiol, 5-methyl-	甲基糠基硫醇	Heterocyclic compound	杂环化合物	-	-	59303-05-8	415841	92964.5	214597	637768	486160	3.0124e+06	1.10068	0.298214	0.519927	5.71788	2.51548	up
XMW1471	GC-MS	C8H17N	1-ButanAmine, N-methyl-N-2-propenyl-	N-甲基-N-2-丙烯基-1-丁胺	Amine	胺	-	-	24209-62-9	3385.71	2928.12	3712.51	6170.61	8390.52	12637.1	1.34324	0.0924758	0.308193	2.71268	1.43972	up
KMW0184	GC-MS	C6H9NS	Thiazole, 2,4,5-trimethyl-	三甲基噻唑	Heterocyclic compound	杂环化合物	-	-	13623-11-5	856.092	1282.77	747.284	424.252	269.113	203.496	1.34341	0.0410763	0.242405	0.310747	-1.68619	down
XMW1454	GC-MS	C6H6O3	Isomaltol	1-（3-羟基呋喃-2-基）乙酮	Ketone	酮	-	-	3420-59-5	22492.2	24066.8	19326.1	6609.65	5879.18	8254.41	1.42947	0.00252562	0.0833265	0.314839	-1.66731	down
XMW0883	GC-MS	C9H16	1,5-Heptadiene, 2,6-dimethyl-	2,6-二甲基-1,5-庚二烯	Hydrocarbons	烃类	-	-	6709-39-3	51418	52920.7	59568.3	95352.3	101104	188117	1.29491	0.13287	0.357941	2.34628	1.23038	up
WMW0047	GC-MS	C8H12O	5-Ethylcyclopent-1-enecarboxAldehyde	5-乙基环戊-1-烯甲醛	Aldehyde	醛	-	-	36431-60-4	39748.4	37761.3	63414.8	22058.9	10679.6	35418.3	1.04848	0.0916048	0.306469	0.483641	-1.04799	down
KMW0293	GC-MS	C8H12O	2,4-Octadienal, (E,E)-	2,4-辛二烯醛	Aldehyde	醛	-	-	30361-28-5	979297	849561	729461	419535	349638	485367	1.37241	0.0122432	0.162707	0.490377	-1.02804	down
KMW0703	GC-MS	C8H10O	Phenol, 4-ethyl-	对氢乙苯	Aromatics	芳烃	-	-	123-07-9	16039.4	14381.2	27711.8	6011.51	6213.83	7949.84	1.33743	0.0915703	0.306469	0.347056	-1.52676	down
XMW0522	GC-MS	C8H11N	Pyridine, 3-propyl-	3-丙基吡啶	Heterocyclic compound	杂环化合物	-	-	4673-31-8	106089	11858.9	121492	272832	302539	2.32072e+06	1.12301	0.321287	0.53667	12.0953	3.59637	up
NMW0012	GC-MS	C9H12	Benzene, 1,2,3-trimethyl-	1,2,3-三甲基苯	Aromatics	芳烃	-	-	526-73-8	11879	11504.1	20050.3	82507.8	17153.7	62749.3	1.09404	0.174578	0.404402	3.7393	1.90277	up
KMW0150	GC-MS	C9H12	Benzene, 1,2,4-trimethyl-	甲基对二甲苯	Aromatics	芳烃	-	-	95-63-6	541760	30384.4	258331	929196	701450	4.81195e+06	1.07212	0.295247	0.519927	7.75771	2.95563	up
NMW0774	GC-MS	C6H14O2	Ethanol, 2-butoxy-	2-丁氧基乙醇	Alcohol	醇	-	-	111-76-2	388587	446655	625136	1.21891e+06	1.0664e+06	2.07342e+06	1.33715	0.084406	0.30281	2.98466	1.57757	up
XMW0291	GC-MS	C5H9NO2	N-Acetylisoxazolidine	N-乙酰乙二唑烷	Heterocyclic compound	杂环化合物	-	-	115615-36-6	1308.37	233.031	1691.75	2872.66	3893.51	32129.5	1.10528	0.340668	0.549188	12.0303	3.58859	up
KMW0079	GC-MS	C8H18	Octane	辛烷	Hydrocarbons	烃类	-	-	111-65-9	49281.1	51440.7	75500.1	96694.3	94040.5	174095	1.21867	0.128503	0.357941	2.07029	1.04983	up
KMW0122	GC-MS	C7H14O	Heptanal	庚醛	Aldehyde	醛	-	-	111-71-7	902484	1.18098e+06	1.57087e+06	3.20748e+06	2.82187e+06	3.2499e+06	1.38179	0.00214305	0.0745784	2.53924	1.3444	up
KMW0100	GC-MS	C7H12O	1-Hepten-3-one	3-庚酮	Ketone	酮	-	-	2918-13-0	15635.3	15440.8	18182.3	86993.6	183184	162131	1.43189	0.0483879	0.252085	8.77635	3.13362	up
XMW0276	GC-MS	C7H12O	4-Hexen-3-one, 5-methyl-	5-甲基-4-己烯-3-酮	Ketone	酮	-	-	13905-10-7	27950.1	25301.6	44276.3	59272.8	59031.6	89293.4	1.2781	0.0462874	0.248347	2.1286	1.0899	up
XMW1467	GC-MS	C6H10N2	1H-Pyrazole, 1,3,5-trimethyl-	1,3,5-三甲基-1H-吡唑	Heterocyclic compound	杂环化合物	-	-	1072-91-9	23419.1	13652.8	23697.6	70549.9	21912.8	97157.4	1.0552	0.188146	0.417952	3.12032	1.64169	up
XMW0884	GC-MS	C7H10O	5-Hexenal, 4-methylene-	4-亚甲基-5-己烯	Hydrocarbons	烃类	-	-	17844-21-2	13004.7	13371.8	22904.8	129325	91873.7	318573	1.38339	0.144827	0.37183	10.9529	3.45324	up
NMW0013	GC-MS	C7H9N	Benzylamine	苄胺	Aromatics	芳烃	-	-	100-46-9	4295.69	4307.88	6414.39	61231.1	13672.8	41192.7	1.31122	0.134088	0.358603	7.73051	2.95056	up
KMW0070	GC-MS	C8H10	Benzene, 1,3-dimethyl-	间二甲苯	Aromatics	芳烃	-	-	108-38-3	3902.51	3249.95	14349.6	8269.03	35878.4	42094.7	1.05244	0.163895	0.393393	4.01088	2.00392	up
KMW0426	GC-MS	C7H5N	Benzonitrile	氰化苯	Aromatics	芳烃	-	-	100-47-0	8821.88	1479.4	8863.88	23485.7	27876.7	206595	1.16997	0.3177	0.533675	13.4597	3.75057	up
KMW0102	GC-MS	C6H14O	1-Hexanol	己醇	Alcohol	醇	-	-	111-27-3	23813.1	30257.9	34630.9	199766	414659	366238	1.43419	0.0444296	0.245995	11.0557	3.46672	up
KMW0107	GC-MS	C6H12O	2-Hexen-1-ol, (Z)-	2-己烯醇	Alcohol	醇	-	-	928-94-9	2070.65	2576.28	3844.78	16043.7	30909.3	31890.5	1.41997	0.043318	0.245995	9.28477	3.21487	up
XMW1116	GC-MS	C6H12O	4-Hexen-1-ol, (E)-	（E）-4-己烯-1-醇	Alcohol	醇	-	-	928-92-7	9	9	9	2571.55	1574.52	2153.88	1.46076	0.0185818	0.191681	233.331	7.86624	up
KMW0111	GC-MS	C6H12O	2-Hexen-1-ol, (E)-	（E）-2-己烯醇	Alcohol	醇	-	-	928-95-0	19264	19533.9	21634.4	44589	56920.5	73370.4	1.41489	0.0435897	0.245995	2.89381	1.53297	up
XMW0001	GC-MS	C6H12O	Cyclohexanol	环己醇	Alcohol	醇	-	-	108-93-0	2704.37	2801.75	5170.54	16103.3	33179.7	33469.8	1.40053	0.0501335	0.257808	7.75081	2.95435	up
KMW0098	GC-MS	C6H12O	3-Hexen-1-ol, (Z)-	（Z）-3-己烯醇	Alcohol	醇	-	-	928-96-1	9634.38	3743.2	13097.3	3438.41	1305.94	2684.14	1.15194	0.139538	0.36648	0.280586	-1.83349	down
KMW0225	GC-MS	C6H12O	3-Hexen-1-ol, (E)-	（E）-3-己烯醇	Alcohol	醇	-	-	928-97-2	11183.2	13101.3	10480.4	30800.7	31336.2	77569.3	1.3298	0.152306	0.381029	4.0186	2.00669	up
NMW0790	GC-MS	C5H8O2	2H-Pyran-2-one, tetrahydro-	四氢-2H-吡喃-2-酮	Ketone	酮	-	-	542-28-9	8799.47	5622.91	9948.99	11603	18561.3	25622.6	1.20491	0.111512	0.338441	2.28903	1.19474	up
XMW0710	GC-MS	CH4N6	1H-Tetrazole-1,5-diAmine	1H-四唑-1,5-二胺	Amine	胺	-	-	2165-21-1	6.93656e+06	5.76698e+06	6.7088e+06	1.23005e+06	1.0884e+06	520110	1.41732	0.000577068	0.0495291	0.146225	-2.77374	down
XMW1120	GC-MS	C4H5NS	Thiocyanic acid, 2-propenyl ester	硫氰酸烯丙酯	Ester	酯	-	-	764-49-8	282682	365844	489877	994903	880717	1.18387e+06	1.38003	0.00579314	0.125494	2.68753	1.42628	up
XMW0430	GC-MS	C5H10N2	2-Piperidinimine	2-哌啶亚胺	Heterocyclic compound	杂环化合物	-	-	22780-54-7	107695	81945.8	91673.8	70721.6	12737.6	44104.8	1.01868	0.0748152	0.295085	0.453456	-1.14097	down
XMW0201	GC-MS	C6H10O	4-Hexen-3-one	4-己烯-3-酮	Ketone	酮	-	-	2497-21-4	49804.4	52806.5	60766.1	93801.5	92918	184221	1.26394	0.148235	0.377227	2.27046	1.18298	up
KMW0088	GC-MS	C6H10O	2-Hexenal, (E)-	(E)-2-己醛	Aldehyde	醛	-	-	6728-26-3	10733.3	13101.3	10195.6	33114.1	31347	85206.4	1.32772	0.160518	0.387435	4.39808	2.13687	up
XMW1115	GC-MS	C6H10O	Isopropenyl ethyl ketone	异丙烯基乙基酮	Ketone	酮	-	-	25044-01-3	3052.3	4152.12	7117.77	17243.3	9517.48	33228	1.24122	0.157467	0.384577	4.18852	2.06644	up
KMW0095	GC-MS	C6H10O	2-Hexenal	2-己醛	Aldehyde	醛	-	-	505-57-7	10984.9	14691.2	10302.1	39398	32523.3	79391.5	1.35465	0.117952	0.344813	4.20569	2.07234	up
KMW0092	GC-MS	C5H6O2	2-Furanmethanol	糠醇	Alcohol	醇	-	-	98-00-0	16315.5	15685	20541.8	27065.7	33213.8	71171.1	1.19638	0.195447	0.42433	2.5018	1.32297	up
KMW0129	GC-MS	C6H8O	2,4-Hexadienal, (E,E)-	2,4-己二醛	Aldehyde	醛	-	-	142-83-6	339047	440564	584985	1.19788e+06	1.0525e+06	1.12931e+06	1.3804	0.00294576	0.0833265	2.47669	1.30842	up
KMW0048	GC-MS	C5H12O	1-Butanol, 3-methyl-	3-甲基-1-丁醇	Alcohol	醇	-	-	123-51-3	24189.7	31415.6	40441.2	95525.5	49623.5	165274	1.20816	0.16513	0.394719	3.23201	1.69243	up
XMW0655	GC-MS	C4H8O2	2-Butene-1,4-diol, (Z)-	（Z）-2-丁烯-1,4-二醇	Alcohol	醇	-	-	6117-80-2	234446	318872	424698	860775	766877	920334	1.3751	0.00210697	0.0745784	2.60526	1.38143	up
XMW0042	GC-MS	C2H3N3O	3H-1,2,4-Triazol-3-one, 1,2-dihydro-	1,2-二氢-3H-1,2,4-三唑-3-酮	Heterocyclic compound	杂环化合物	-	-	930-33-6	52329.7	71538.8	88228	440655	303457	380139	1.42699	0.0123203	0.162707	5.30066	2.40617	up
XMW1388	GC-MS	C4H8N2	1H-Imidazole, 4,5-dihydro-2-methyl-	1H-咪唑，4,5-二氢-2-甲基-	Heterocyclic compound	杂环化合物	-	-	534-26-9	407682	525249	698766	1.40862e+06	1.25474e+06	1.49626e+06	1.38499	0.00177832	0.0714996	2.54926	1.35008	up
XMW0650	GC-MS	C5H8O	2-Butenal, 3-methyl-	3-甲基-2-丁醛	Aldehyde	醛	-	-	107-86-8	6624.76	12245.2	12533	4275.04	3431.3	5346.54	1.26575	0.0763983	0.296193	0.415657	-1.26653	down
KMW0047	GC-MS	C5H8O	2-Butenal, 2-methyl-	甲基-2-丁烯醛	Aldehyde	醛	-	-	1115-11-3	26822.3	31701.5	41127.7	96517.2	49257.8	185902	1.18265	0.19212	0.419854	3.32837	1.73482	up
XMW0132	GC-MS	C5H9N	Pyridine, 2,3,4,5-tetrahydro-	2,3,4,5-四氢吡啶	Heterocyclic compound	杂环化合物	-	-	505-18-0	27665.8	28364.9	40626.8	91120.6	48966.8	178126	1.19201	0.190278	0.417952	3.29218	1.71904	up
XMW1208	GC-MS	CH2N4	1H-Tetrazole	1H-四唑	Heterocyclic compound	杂环化合物	-	-	288-94-8	3126.23	2042.14	4807.58	9506.82	3704.6	8618.87	1.03064	0.147049	0.375312	2.18829	1.1298	up
D207	GC-MS	C2H5NO	Acetamide	乙酰胺	Amine	胺	-	-	60-35-5	4904.88	4721.63	6685.67	12452.1	10748.6	12995.4	1.40031	0.00203075	0.0745784	2.21896	1.14989	up
